# Supplementary material for: Targeting Hodgkin and Reed–Sternberg Cells with an Inhibitor of Heat-Shock Protein 90: Molecular Pathways of Response and Potential Mechanisms of Resistance
Source: MDPI journal article supplement (doi:10.3390/ijms19030836), 2018-03-13
Supplement: s1 [file s1]

**Targeting Hodgkin and Reed-Sternberg cells with an inhibitor of heat-shock protein 90: Molecular pathways of response and potential mechanisms of resistance**

Priscilla Segges<sup>a</sup>, Stephany Corrêa<sup>b</sup>, Bárbara Du Rocher<sup>b,c</sup>, Gabriela Vera-Lozada<sup>a</sup>, Flavia Krsticevic<sup>a,d</sup>, Debora Arce<sup>d,e</sup>, Cinthya Sternberg<sup>f,g</sup>, Eliana Abdelhay<sup>b</sup>, Rocio Hassan<sup>a</sup>

<sup>a</sup>Oncovirology Laboratory, Bone Marrow Transplantation Center (CEMO), Instituto Nacional de Câncer (INCA), Rio de Janeiro, Brazil; <sup>b</sup>Laboratório Célula-Tronco, CEMO, Instituto Nacional de Câncer (INCA), Rio de Janeiro, Brazil; <sup>c</sup>Laboratório de Pesquisa sobre o Timo, FIOCRUZ, Rio de Janeiro, Brazil; <sup>d</sup>CIFASIS - Centro Internacional Franco Argentino de Ciencias de la Información y de Sistemas, Rosario, Argentina; <sup>e</sup>IICAR-CONICET Instituto de Ciencias Agrarias de Rosario, Rosario, Argentina; <sup>f</sup>Laboratório de Pesquisa Translacional, Instituto Nacional de Câncer (INCA), Rio de Janeiro, Brazil; <sup>g</sup>current addres: Programa de Pós-Graduação em Anatomia Patológica, Faculdade de Medicina da Universidade Federal do Rio de Janeiro, Brazil.

**CORRESPONDENCE TO:** Priscilla Segges.

Instituto Nacional de Câncer, Praça Cruz Vermelha, n° 23, 6° andar, ala C, CEMO, Laboratório de Oncovirologia, CEP: 20230130, Rio de Janeiro, RJ, Brazil.

Telephone: 5521-3207-1874 Fax: 5521-3207-2121

Email: psegges@inca.gov.br

## Supplementary File S7

**Table S7** Representative Biological process modulated in KM-H2 and L428 cell lines.

| #                      | Biological processes                                                | FDR       | N# proteins in total | N# proteins identified |
|------------------------|---------------------------------------------------------------------|-----------|----------------------|------------------------|
| <b>KM-H2 cell line</b> |                                                                     |           |                      |                        |
| 1                      | posttranscriptional regulation of gene expression                   | 5,542E-13 | 669                  | 39                     |
| 2                      | chromosome organization                                             | 9,420E-12 | 1344                 | 53                     |
| 3                      | organelle organization                                              | 9,420E-12 | 4189                 | 103                    |
| 4                      | regulation of organelle organization                                | 1,119E-11 | 1713                 | 60                     |
| 5                      | regulation of cellular component organization                       | 1,189E-11 | 3298                 | 88                     |
| 6                      | cellular protein metabolic process                                  | 1,189E-11 | 4577                 | 108                    |
| 7                      | Fc receptor signaling pathway                                       | 1,316E-11 | 361                  | 27                     |
| 8                      | cellular component organization or biogenesis                       | 1,316E-11 | 7183                 | 144                    |
| 9                      | cell cycle                                                          | 7,472E-11 | 1770                 | 59                     |
| 10                     | cellular metabolic process                                          | 7,518E-11 | 10816                | 186                    |
| <b>L428 cell line</b>  |                                                                     |           |                      |                        |
| 1                      | translational initiation                                            | 1,170E-24 | 173                  | 32                     |
| 2                      | SRP-dependent cotranslational protein targeting to membrane         | 1,079E-20 | 103                  | 24                     |
| 3                      | protein localization to endoplasmic reticulum                       | 1,080E-20 | 148                  | 27                     |
| 4                      | viral gene expression                                               | 1,553E-20 | 136                  | 26                     |
| 5                      | nuclear-transcribed mRNA catabolic process, nonsense-mediated decay | 1,553E-20 | 137                  | 26                     |
| 6                      | viral transcription                                                 | 1,691E-20 | 124                  | 25                     |
| 7                      | cotranslational protein targeting to membrane                       | 1,691E-20 | 110                  | 24                     |
| 8                      | protein targeting to ER                                             | 7,170E-20 | 117                  | 24                     |
| 9                      | establishment of protein localization to endoplasmic reticulum      | 1,841E-19 | 122                  | 24                     |
| 10                     | cellular component biogenesis                                       | 9,278E-19 | 3351                 | 106                    |

\*Process listed in the table are those statistically most relevant using the Metacore Analysis.  
FDR: *False discovery rate*.
