# Supplementary material for: Targeting Hodgkin and Reed–Sternberg Cells with an Inhibitor of Heat-Shock Protein 90: Molecular Pathways of Response and Potential Mechanisms of Resistance
Source: MDPI journal article supplement (doi:10.3390/ijms19030836), 2018-03-13
Supplement: s1 [file s1]

**Targeting Hodgkin and Reed-Sternberg cells with an inhibitor of heat-shock protein 90: Molecular pathways of response and potential mechanisms of resistance**

Priscilla Segges<sup>a</sup>, Stephany Corrêa<sup>b</sup>, Bárbara Du Rocher<sup>b,c</sup>, Gabriela Vera-Lozada<sup>a</sup>, Flavia Krsticevic<sup>a,d</sup>, Debora Arce<sup>d,e</sup>, Cinthya Sternberg<sup>f,g</sup>, Eliana Abdelhay<sup>b</sup>, Rocio Hassan<sup>a</sup>

<sup>a</sup>Oncovirology Laboratory, Bone Marrow Transplantation Center (CEMO), Instituto Nacional de Câncer (INCA), Rio de Janeiro, Brazil; <sup>b</sup>Laboratório Célula-Tronco, CEMO, Instituto Nacional de Câncer (INCA), Rio de Janeiro, Brazil; <sup>c</sup>Laboratório de Pesquisa sobre o Timo, FIOCRUZ, Rio de Janeiro, Brazil; <sup>d</sup>CIFASIS - Centro Internacional Franco Argentino de Ciencias de la Información y de Sistemas, Rosario, Argentina; <sup>e</sup>IICAR-CONICET Instituto de Ciencias Agrarias de Rosario, Rosario, Argentina; <sup>f</sup>Laboratório de Pesquisa Translacional, Instituto Nacional de Câncer (INCA), Rio de Janeiro, Brazil; <sup>g</sup>current addres: Programa de Pós-Graduação em Anatomia Patológica, Faculdade de Medicina da Universidade Federal do Rio de Janeiro, Brazil.

**CORRESPONDENCE TO:** Priscilla Segges.

Instituto Nacional de Câncer, Praça Cruz Vermelha, n° 23, 6° andar, ala C, CEMO, Laboratório de Oncovirologia, CEP: 20230130, Rio de Janeiro, RJ, Brazil. Telephone: 5521-3207-1874 Fax: 5521-3207-2121 Email: psegges@inca.gov.br

## Supplementary File 1

### Reagents

All reagents and solvents employed were commercially available and used as recommended by the manufacturers. RPMI 1640, streptomycin/penicillin for cell culture, 0.4% trypan blue vital stain, propidium iodide (PI), RNase and dimethyl sulfoxide (DMSO) were purchased from Sigma-Aldrich Co. (St. Louis, MO). 4-[3-(4-iodophenyl)-2-(4-nitrophenyl)-2H-5-tetrazolio]-1,3-benzene disulfonate (WST-1), protease inhibitor cocktail and ECL Plus® for western blot were purchased from Roche (Mannheim, Germany). Fetal bovine serum (FBS) was obtained from Gibco Life Technologies (Grand Island, NY). Annexin V-FITC Apoptosis Detection Kit and Caspase-Glo® 3/7 Assay Kit and ReliaPrep™ were purchased from BD Biosciences (Franklin Lakes, NJ) and Promega Corporation (Madison WI), respectively.

Antibodies against phospho-p44/42 (p-ERK1/2, D13.14.4E), p44/42 (ERK1/2), RAS (27H5), HSP70, HSF-1, HSP27 (G31), and anti-rabbit or mouse IgG HRP-linked were purchased from Cell Signaling Technology, Inc (Beverly, MA). Anti-actin and phospho-c-Fos antibodies were obtained from Santa Cruz Biotechnology (Santa Cruz, Calif) and Abcam (Cambridge, MA), respectively.

Celastrol with purity greater than 98% was purchased from Cayman Chemical (Ann Arbor, MI, USA).
