# Supplementary material for: Targeting Hodgkin and Reed–Sternberg Cells with an Inhibitor of Heat-Shock Protein 90: Molecular Pathways of Response and Potential Mechanisms of Resistance
Source: Int J Mol Sci. 2018 Mar 13;19(3):836. doi: 10.3390/ijms19030836 (PMC5877697; doi:10.3390/ijms19030836)
Supplement: Supplementary file 1 [file ijms-19-00836-s001.zip › Supplementary Table S1.xlsx]

## Sheet: 20140319_KHM2_NT_1_2D58MIN_01_I
protein.key	protein.Entry	protein.Accession	protein.Description	protein.dataBaseType	protein.score	protein.falsePositiveRate	protein.avgMass	protein.MatchedProducts	protein.matchedPeptides	protein.digestPeps	protein.seqCover(%)	protein.MatchedPeptideIntenSum	protein.top3MatchedPeptideIntenSum	protein.MatchedProductIntenSum	protein.fmolOnColumn	protein.ngramOnColumn	protein.AutoCurate	protein.Key_ForHomologs
387	P60709	ACTB_HUMAN	Actin cytoplasmic 1 OS Homo sapiens GN ACTB PE 1 SV 1	Regular	47358.1	0	42079	308	21	34	70.4	4801320	1641460	1406746	384.584	16.1829	Green	389 388 13462
389	P63261	ACTG_HUMAN	Actin cytoplasmic 2 OS Homo sapiens GN ACTG1 PE 1 SV 1	Regular	47358.1	0	42135.1	308	21	34	70.4	4801320	0	1406746			Green	388 387 13462
13712	P07737	PROF1_HUMAN	Profilin 1 OS Homo sapiens GN PFN1 PE 1 SV 2	Regular	38728.1	0	15225.3	96	8	16	60.71	1115562	722767	287450	169.34	2.5783	Green
6615	P04406	G3P_HUMAN	Glyceraldehyde 3 phosphate dehydrogenase OS Homo sapiens GN GAPDH PE 1 SV 3	Regular	34741.2	0	36224.4	194	18	21	59.7	2115472	962524	717666	225.513	8.1691	Green
5431	P06733	ENOA_HUMAN	Alpha enolase OS Homo sapiens GN ENO1 PE 1 SV 2	Regular	32962.4	0	47511.2	244	24	31	62.67	2915038	870138	856144	203.868	9.686	Green	5434
9183	P14618	KPYM_HUMAN	Pyruvate kinase isozymes M1 M2 OS Homo sapiens GN PKM PE 1 SV 4	Regular	31176	0	58507.3	352	33	43	68.74	3107240	682835	867627	159.984	9.3602	Green	35151 9184
3625	P23528	COF1_HUMAN	Cofilin 1 OS Homo sapiens GN CFL1 PE 1 SV 3	Regular	30633.4	0	18730.6	118	13	19	77.11	764127	365024	243594	85.5227	1.6019	Green	3626
14699	P62987	RL40_HUMAN	Ubiquitin 60S ribosomal protein L40 OS Homo sapiens GN UBA52 PE 1 SV 2	Regular	29392.7	0	15013.5	71	7	9	46.09	1199435	823801	357385	193.011	2.8978	Green
7876	P07900	HS90A_HUMAN	Heat shock protein HSP 90 alpha OS Homo sapiens GN HSP90AA1 PE 1 SV 5	Regular	27975.8	0	85059.1	406	46	92	62.57	4233965	501623	1088326	117.527	9.9967	Green	7516 7874 7877 2267 5466
7877	P08238	HS90B_HUMAN	Heat shock protein HSP 90 beta OS Homo sapiens GN HSP90AB1 PE 1 SV 4	Regular	25324.5	0	83606.5	359	41	67	57.6	3786424	447490	1003835	104.844	8.7656	Green	5439 7516 7874 2267 5466 7876
17921	P60174	TPIS_HUMAN	Triosephosphate isomerase OS Homo sapiens GN TPI1 PE 1 SV 3	Regular	24119.8	0	31076.2	152	17	26	74.13	1040369	356189	331954	83.4528	2.5934	Green
7899	P11142	HSP7C_HUMAN	Heat shock cognate 71 kDa protein OS Homo sapiens GN HSPA8 PE 1 SV 1	Regular	22340.6	0	71126.3	309	32	50	60.22	2190873	409510	666542	95.9456	6.8243	Green	7349 7894 7871 7897
0	P00330	ADH1_YEAST	Alcohol dehydrogenase 1 OS Saccharomyces cerevisiae strain ATCC 204508 S288c GN ADH1 PE 1 SV 5	Regular	21202.8	0	37305.4	170	20	25	61.21	2341357	853630	606184	200	7.4611	Green
9510	P07195	LDHB_HUMAN	L lactate dehydrogenase B chain OS Homo sapiens GN LDHB PE 1 SV 2	Regular	20847.1	0	36923.7	138	15	25	47.01	1124808	318474	253482	74.6164	2.7551	Green	9511 9509 9507
9509	P00338	LDHA_HUMAN	L lactate dehydrogenase A chain OS Homo sapiens GN LDHA PE 1 SV 2	Regular	20431.2	0	36973.9	136	19	31	63.86	1160417	299173	236940	70.0943	2.5917	Green	9510 9511 9507
12997	P18669	PGAM1_HUMAN	Phosphoglycerate mutase 1 OS Homo sapiens GN PGAM1 PE 1 SV 2	Regular	20314.4	0	28918	132	11	20	61.81	579892	268349	175014	62.8724	1.8181	Green
13020	P00558	PGK1_HUMAN	Phosphoglycerate kinase 1 OS Homo sapiens GN PGK1 PE 1 SV 3	Regular	19018.3	0	45014	215	23	33	63.79	1237363	379080	365906	88.8159	3.998	Green	13021 25721
13526	P62937	PPIA_HUMAN	Peptidyl prolyl cis trans isomerase A OS Homo sapiens GN PPIA PE 1 SV 2	Regular	18809.9	0	18240.6	102	14	12	80.61	1341822	605090	330002	141.769	2.586	Green	14304
14184	P62826	RAN_HUMAN	GTP binding nuclear protein Ran OS Homo sapiens GN RAN PE 1 SV 3	Regular	18224.2	0	24594.2	93	10	17	47.69	728844	261852	160061	61.3502	1.5089	Green
661	P04075	ALDOA_HUMAN	Fructose bisphosphate aldolase A OS Homo sapiens GN ALDOA PE 1 SV 2	Regular	17486.2	0	39876.3	194	23	31	79.67	1181623	286220	302338	67.0595	2.6741	Green	663 662
388	P68032	ACTC_HUMAN	Actin alpha cardiac muscle 1 OS Homo sapiens GN ACTC1 PE 1 SV 1	Regular	16547.9	0	42361.2	139	13	34	39.79	2494550	652977	708338	152.988	6.4808	Green	389 387 13462
5226	P68104	EF1A1_HUMAN	Elongation factor 1 alpha 1 OS Homo sapiens GN EEF1A1 PE 1 SV 1	Regular	16040.3	0	50483.1	185	17	32	48.92	1691494	594395	383648	139.263	7.0304	Green	5227
13462	Q6S8J3	POTEE_HUMAN	POTE ankyrin domain family member E OS Homo sapiens GN POTEE PE 1 SV 3	Regular	15437.5	0	122961	123	16	100	20.93	2133610	1014300	533117	237.644	29.2208	Green	389 388 387
11230	P22392	NDKB_HUMAN	Nucleoside diphosphate kinase B OS Homo sapiens GN NME2 PE 1 SV 1	Regular	14941	0	17412.1	64	9	14	56.58	583371	221483	108513	51.8921	0.9036	Green	11229
17082	P07437	TBB5_HUMAN	Tubulin beta chain OS Homo sapiens GN TUBB PE 1 SV 2	Regular	14423.5	0	50127.2	179	18	30	57.21	1009594	311361	281691	72.9499	3.6568	Green	17085 17081
7516	Q58FF8	H90B2_HUMAN	Putative heat shock protein HSP 90 beta 2 OS Homo sapiens GN HSP90AB2P PE 1 SV 2	Regular	13361.2	0	44520.1	117	15	44	38.32	1373102	204894	317229	48.0052	2.1372	Green	5439 7877 7876
10490	P14174	MIF_HUMAN	Macrophage migration inhibitory factor OS Homo sapiens GN MIF PE 1 SV 4	Regular	12766.4	0	12647.4	23	4	6	71.3	404472	397344	91619	93.0951	1.1774	Green
13668	Q06830	PRDX1_HUMAN	Peroxiredoxin 1 OS Homo sapiens GN PRDX1 PE 1 SV 1	Regular	12107.5	0	22338.5	92	13	18	73.37	858535	318210	165102	74.5546	1.6654	Green	13671
12669	Q99497	PARK7_HUMAN	Protein DJ 1 OS Homo sapiens GN PARK7 PE 1 SV 2	Regular	11748.5	0	20062.2	82	9	27	49.74	355466	178064	129496	41.7193	0.837	Green
7901	P04792	HSPB1_HUMAN	Heat shock protein beta 1 OS Homo sapiens GN HSPB1 PE 1 SV 2	Regular	11619	0	22839.6	77	10	15	73.17	376606	218987	138497	51.3072	1.1718	Green
15076	P08865	RSSA_HUMAN	40S ribosomal protein SA OS Homo sapiens GN RPSA PE 1 SV 4	Regular	11196.7	0	32968.2	60	6	25	30.17	200383	126380	68772	29.61	0.9762	Green
13918	P06454	PTMA_HUMAN	Prothymosin alpha OS Homo sapiens GN PTMA PE 1 SV 2	Regular	11172.5	0	12203	46	5	10	23.42	289446	266539	52076	62.4484	0.7621	Green
7	P27348	1433T_HUMAN	14 3 3 protein theta OS Homo sapiens GN YWHAQ PE 1 SV 1	Regular	10723	0	28049.4	105	14	24	55.51	598784	133334	131026	31.2393	0.8762	Green	2 5 8 3
17067	P68363	TBA1B_HUMAN	Tubulin alpha 1B chain OS Homo sapiens GN TUBA1B PE 1 SV 1	Regular	10547.7	0	50836	94	11	34	38.14	710092	370330	243138	86.7659	4.4108	Green	17072
3	P62258	1433E_HUMAN	14 3 3 protein epsilon OS Homo sapiens GN YWHAE PE 1 SV 1	Regular	10203.9	0	29345	76	10	29	46.67	491463	163286	110244	38.2568	1.1226	Green	2 5 7 8
17081	P68371	TBB4B_HUMAN	Tubulin beta 4B chain OS Homo sapiens GN TUBB4B PE 1 SV 1	Regular	10008	0	50287.4	133	17	30	51.46	687714	54031.5	182819	12.6592	0.6366	Green	17082 17085
7493	O60814	H2B1K_HUMAN	Histone H2B type 1 K OS Homo sapiens GN HIST1H2BK PE 1 SV 3	Regular	9663.41	0	13890.2	44	5	11	41.27	253170	197074	52794	46.1732	0.6414	Green
7473	Q99878	H2A1J_HUMAN	Histone H2A type 1 J OS Homo sapiens GN HIST1H2AJ PE 1 SV 3	Regular	9382.69	0	13936.3	28	3	7	27.34	270336	265317	58226	62.1621	0.8663	Green
11229	P15531	NDKA_HUMAN	Nucleoside diphosphate kinase A OS Homo sapiens GN NME1 PE 1 SV 1	Regular	9222.54	0	17319.8	46	7	15	43.42	389610	137813	73669	32.2887	0.5592	Green	11230
2083	P62158	CALM_HUMAN	Calmodulin OS Homo sapiens GN CALM1 PE 1 SV 2	Regular	7790.07	0	16837.7	44	6	23	44.3	211857	163173	67871	38.2304	0.6437	Green
14887	P09651	ROA1_HUMAN	Heterogeneous nuclear ribonucleoprotein A1 OS Homo sapiens GN HNRNPA1 PE 1 SV 5	Regular	7730.85	0	38860.8	95	13	29	40.05	506669	262016	111744	61.3887	2.3856	Green	14889
7802	P61978	HNRPK_HUMAN	Heterogeneous nuclear ribonucleoprotein K OS Homo sapiens GN HNRNPK PE 1 SV 1	Regular	7455.41	0	51261.5	114	18	38	49.46	493349	140024	124699	32.8067	1.6817	Green
13342	P13796	PLSL_HUMAN	Plastin 2 OS Homo sapiens GN LCP1 PE 1 SV 6	Regular	7235.43	0	70858.8	214	35	54	64.91	1058099	199064	244791	46.6394	3.3048	Green	13343 13341
5434	P09104	ENOG_HUMAN	Gamma enolase OS Homo sapiens GN ENO2 PE 1 SV 3	Regular	6969.69	0	47610.8	55	9	30	33.87	602763	69202.8	241768	16.2138	0.772	Green	5431
7871	P34931	HS71L_HUMAN	Heat shock 70 kDa protein 1 like OS Homo sapiens GN HSPA1L PE 1 SV 2	Regular	6730.31	0	70774.3	68	7	48	12.79	613447	0	198538			Green	7349 7899 7894 7897
12810	P12004	PCNA_HUMAN	Proliferating cell nuclear antigen OS Homo sapiens GN PCNA PE 1 SV 1	Regular	6475.75	0	29111	56	7	23	34.1	183919	102121	48081	23.9263	0.6965	Green
2086	P27797	CALR_HUMAN	Calreticulin OS Homo sapiens GN CALR PE 1 SV 1	Regular	6371.47	0	48312.7	104	14	47	38.61	620572	256182	128426	60.0218	2.8998	Green
7395	P09211	GSTP1_HUMAN	Glutathione S transferase P OS Homo sapiens GN GSTP1 PE 1 SV 2	Regular	6366.29	0	23584	62	8	15	55.24	343625	198167	87500	46.4293	1.095	Green
3626	Q9Y281	COF2_HUMAN	Cofilin 2 OS Homo sapiens GN CFL2 PE 1 SV 1	Regular	6031.8	0	18850.7	29	6	18	43.37	241833	12134.4	56471	2.843	0.0536	Green	3625
17238	Q15185	TEBP_HUMAN	Prostaglandin E synthase 3 OS Homo sapiens GN PTGES3 PE 1 SV 1	Regular	5968.77	0	18982.6	46	6	15	41.88	234743	152174	47515	35.6534	0.6768	Green
8440	Q15181	IPYR_HUMAN	Inorganic pyrophosphatase OS Homo sapiens GN PPA1 PE 1 SV 2	Regular	5914.59	0	33116.3	89	12	26	61.25	397773	133013	103328	31.1641	1.032	Green
17028	P37802	TAGL2_HUMAN	Transgelin 2 OS Homo sapiens GN TAGLN2 PE 1 SV 3	Regular	5911.88	0	22562.6	66	12	25	72.86	400734	174430	77050	40.8678	0.9221	Green
7349	P11021	GRP78_HUMAN	78 kDa glucose regulated protein OS Homo sapiens GN HSPA5 PE 1 SV 2	Regular	5869.69	0	72447.1	112	18	52	32.11	554608	82219	169622	19.2634	1.3956	Green	7899 7894 7871
10086	P43358	MAGA4_HUMAN	Melanoma associated antigen 4 OS Homo sapiens GN MAGEA4 PE 1 SV 2	Regular	5812.69	0	35127.4	93	11	21	34.38	727569	311877	186634	73.0708	2.5668	Green	10103 10096 10090 10083
17275	P55072	TERA_HUMAN	Transitional endoplasmic reticulum ATPase OS Homo sapiens GN VCP PE 1 SV 4	Regular	5747.74	0	90006.3	217	32	69	59.93	670266	129046	199372	30.2347	2.7213	Green
8	P63104	1433Z_HUMAN	14 3 3 protein zeta delta OS Homo sapiens GN YWHAZ PE 1 SV 1	Regular	5587.36	0	27916.2	71	13	25	54.29	523725	81121	106050	19.0061	0.5306	Green	2 5 7 3
14711	P05386	RLA1_HUMAN	60S acidic ribosomal protein P1 OS Homo sapiens GN RPLP1 PE 1 SV 1	Regular	5516.77	0	11628	12	2	7	51.75	41090	61635	10972	14.4407	0.1679	Green
17398	P10599	THIO_HUMAN	Thioredoxin OS Homo sapiens GN TXN PE 1 SV 3	Regular	5507.22	0	12022.7	26	4	9	40	244897	216923	52693	50.8237	0.611	Green
7894	P08107	HSP71_HUMAN	Heat shock 70 kDa protein 1A 1B OS Homo sapiens GN HSPA1A PE 1 SV 5	Regular	5502.36	0	70337.5	109	20	49	38.22	753379	111074	184409	26.0238	1.8304	Green	7349 7899 7871 7897
5439	P14625	ENPL_HUMAN	Endoplasmin OS Homo sapiens GN HSP90B1 PE 1 SV 1	Regular	5465.63	0	92754.2	145	24	82	32.38	687565	167617	174538	39.2716	3.6426	Green	7516 7877
5227	Q05639	EF1A2_HUMAN	Elongation factor 1 alpha 2 OS Homo sapiens GN EEF1A2 PE 1 SV 1	Regular	5449.16	0	50812.4	89	12	32	38.44	856838	69082	165995	16.1855	0.8224	Green	5226
18462	P61088	UBE2N_HUMAN	Ubiquitin conjugating enzyme E2 N OS Homo sapiens GN UBE2N PE 1 SV 1	Regular	5239.99	0	17194.9	36	8	13	51.32	126893	78715	31951	18.4424	0.3171	Green
752	P39687	AN32A_HUMAN	Acidic leucine rich nuclear phosphoprotein 32 family member A OS Homo sapiens GN ANP32A PE 1 SV 1	Regular	5136.65	0	28699.5	44	8	15	26.91	259720	139880	54453	32.7729	0.9406	Green	753 881
15742	Q01105	SET_HUMAN	Protein SET OS Homo sapiens GN SET PE 1 SV 3	Regular	5052.1	0	33488.9	48	6	17	26.21	243232	158157	64641	37.0552	1.2409	Green
18431	P68036	UB2L3_HUMAN	Ubiquitin conjugating enzyme E2 L3 OS Homo sapiens GN UBE2L3 PE 1 SV 1	Regular	5044.39	0	18032.7	32	7	12	53.9	181829	117987	30075	27.6436	0.4985	Green
5306	O60739	EIF1B_HUMAN	Eukaryotic translation initiation factor 1b OS Homo sapiens GN EIF1B PE 1 SV 2	Regular	5006.24	0	12937.7	13	1	9	14.16	20316	60948	9022	14.2797	0.1847	Green
6518	Q16658	FSCN1_HUMAN	Fascin OS Homo sapiens GN FSCN1 PE 1 SV 3	Regular	4988.66	0	55157.3	149	18	42	40.97	632529	200362	175547	46.9435	2.5893	Green
13673	P30041	PRDX6_HUMAN	Peroxiredoxin 6 OS Homo sapiens GN PRDX6 PE 1 SV 3	Regular	4863.64	0	25149.1	53	9	28	51.79	238452	119062	61198	27.8955	0.7015	Green
6838	P52565	GDIR1_HUMAN	Rho GDP dissociation inhibitor 1 OS Homo sapiens GN ARHGDIA PE 1 SV 3	Regular	4850.04	0	23264.2	33	7	17	34.8	138424	105247	36532	24.6587	0.5737	Green	6839
12929	P30086	PEBP1_HUMAN	Phosphatidylethanolamine binding protein 1 OS Homo sapiens GN PEBP1 PE 1 SV 3	Regular	4802.01	0	21170.9	48	7	13	59.36	184021	106465	40775	24.9441	0.5281	Green
5	P61981	1433G_HUMAN	14 3 3 protein gamma OS Homo sapiens GN YWHAG PE 1 SV 2	Regular	4544.48	0	28473.7	50	10	25	44.13	389341	44642	84759	10.4593	0.2978	Green	2 8 7 3
663	P09972	ALDOC_HUMAN	Fructose bisphosphate aldolase C OS Homo sapiens GN ALDOC PE 1 SV 2	Regular	4442.83	0	39855.1	53	11	33	37.91	208367	88357	83379	20.7015	0.8251	Green	662 661
14888	P22626	ROA2_HUMAN	Heterogeneous nuclear ribonucleoproteins A2 B1 OS Homo sapiens GN HNRNPA2B1 PE 1 SV 2	Regular	4417.04	0	37486.8	81	16	29	47.59	568262	230759	99439	54.0654	2.0267	Green
7512	P62805	H4_HUMAN	Histone H4 OS Homo sapiens GN HIST1H4A PE 1 SV 2	Regular	4376.66	0	11367.4	33	6	11	58.25	143302	112307	31526	26.3128	0.2991	Green
2	P31946	1433B_HUMAN	14 3 3 protein beta alpha OS Homo sapiens GN YWHAB PE 1 SV 3	Regular	4271.55	0	28196.5	53	9	22	43.09	430554	62994.2	95896	14.7591	0.4162	Green	5 8 7 3
17085	Q3ZCM7	TBB8_HUMAN	Tubulin beta 8 chain OS Homo sapiens GN TUBB8 PE 1 SV 2	Regular	4133.29	0	50289.4	58	8	30	23.42	207836	38288	69220	8.9706	0.4511	Green	17082 17081
16214	P00441	SODC_HUMAN	Superoxide dismutase Cu Zn OS Homo sapiens GN SOD1 PE 1 SV 2	Regular	3930.31	0	16163.9	42	6	13	61.69	205366	130912	38923	30.6718	0.4958	Green
18441	P22314	UBA1_HUMAN	Ubiquitin like modifier activating enzyme 1 OS Homo sapiens GN UBA1 PE 1 SV 3	Regular	3922.82	0	118933	165	24	68	32.42	547430	142394	160497	33.362	3.9678	Green
5234	P13639	EF2_HUMAN	Elongation factor 2 OS Homo sapiens GN EEF2 PE 1 SV 4	Regular	3881.16	0	96307.8	208	40	69	51.4	1208824	209630	218180	49.115	4.7302	Green	18406
11621	P06748	NPM_HUMAN	Nucleophosmin OS Homo sapiens GN NPM1 PE 1 SV 2	Regular	3871.12	0	32746.2	52	8	22	35.03	205779	109681	46532	25.6976	0.8415	Green
14712	P05387	RLA2_HUMAN	60S acidic ribosomal protein P2 OS Homo sapiens GN RPLP2 PE 1 SV 1	Regular	3836.73	0	11665	18	2	9	45.22	53111	78291	19953	18.3431	0.214	Green
753	Q92688	AN32B_HUMAN	Acidic leucine rich nuclear phosphoprotein 32 family member B OS Homo sapiens GN ANP32B PE 1 SV 1	Regular	3798.02	0	28958.8	31	7	14	27.89	199649	56261.5	40474	13.1817	0.3817	Green	881 752
13021	P07205	PGK2_HUMAN	Phosphoglycerate kinase 2 OS Homo sapiens GN PGK2 PE 1 SV 3	Regular	3638.01	0	45195.4	55	10	34	20.62	382281	16256.4	76904	3.8088	0.1721	Green	25721 13020
13979	P22234	PUR6_HUMAN	Multifunctional protein ADE2 OS Homo sapiens GN PAICS PE 1 SV 3	Regular	3575.57	0	47820.6	80	20	35	49.18	249895	64519	53804	15.1164	0.7229	Green
11582	P55209	NP1L1_HUMAN	Nucleosome assembly protein 1 like 1 OS Homo sapiens GN NAP1L1 PE 1 SV 1	Regular	3533.54	0	45659.3	42	5	25	22.51	193613	146002	70592	34.2073	1.5619	Green
8129	P60842	IF4A1_HUMAN	Eukaryotic initiation factor 4A I OS Homo sapiens GN EIF4A1 PE 1 SV 1	Regular	3479.21	0	46382.2	75	14	46	38.67	268786	111549	62048	26.1352	1.2122	Green
6753	P63244	GBLP_HUMAN	Guanine nucleotide binding protein subunit beta 2 like 1 OS Homo sapiens GN GNB2L1 PE 1 SV 3	Regular	3420.82	0	35533	57	11	27	53.94	194971	93867	38090	21.9924	0.7815	Green
10297	P40925	MDHC_HUMAN	Malate dehydrogenase cytoplasmic OS Homo sapiens GN MDH1 PE 1 SV 4	Regular	3394.52	0	36654.3	65	13	34	37.43	248343	122759	67461	28.7616	1.0542	Green
7897	P17066	HSP76_HUMAN	Heat shock 70 kDa protein 6 OS Homo sapiens GN HSPA6 PE 1 SV 2	Regular	3159.13	0	71484.5	43	15	56	27.06	350843	17397.3	93022	4.0761	0.2914	Green	7899 7871 7894
9507	Q6ZMR3	LDH6A_HUMAN	L lactate dehydrogenase A like 6A OS Homo sapiens GN LDHAL6A PE 2 SV 1	Regular	3113.82	0	36849.6	31	9	24	26.2	293330	60543.6	82944	14.185	0.5227	Green	9510 9511 9509
7807	Q00839	HNRPU_HUMAN	Heterogeneous nuclear ribonucleoprotein U OS Homo sapiens GN HNRNPU PE 1 SV 6	Regular	3105.85	0	91325.9	115	18	55	28.61	725072	305024	178269	71.4652	6.5266	Green
15022	P62249	RS16_HUMAN	40S ribosomal protein S16 OS Homo sapiens GN RPS16 PE 1 SV 2	Regular	3024.34	0	16559.4	25	5	18	38.36	79728	67588	20880	15.8354	0.2622	Green
16669	P16949	STMN1_HUMAN	Stathmin OS Homo sapiens GN STMN1 PE 1 SV 3	Regular	2978.93	0	17302.5	31	7	24	39.6	184634	135530	30981	31.7538	0.5494	Green
7750	P26583	HMGB2_HUMAN	High mobility group protein B2 OS Homo sapiens GN HMGB2 PE 1 SV 2	Regular	2975.07	0	24204.9	40	8	17	38.76	195566	109566	34186	25.6707	0.6214	Green	7749
4383	P04080	CYTB_HUMAN	Cystatin B OS Homo sapiens GN CSTB PE 1 SV 2	Regular	2953.96	0	11196.6	13	4	7	70.41	60594	57376	5837	13.4428	0.1505	Green
17195	P53999	TCP4_HUMAN	Activated RNA polymerase II transcriptional coactivator p15 OS Homo sapiens GN SUB1 PE 1 SV 3	Regular	2913.37	0	14395.4	20	5	15	39.37	99889	78710	20666	18.4413	0.2655	Green
9511	P07864	LDHC_HUMAN	L lactate dehydrogenase C chain OS Homo sapiens GN LDHC PE 2 SV 4	Regular	2895.89	0	36653.5	16	4	27	22.59	275263	126410	80208	29.6171	1.0856	Green	9510 9509 9507
15042	P23396	RS3_HUMAN	40S ribosomal protein S3 OS Homo sapiens GN RPS3 PE 1 SV 2	Regular	2872.87	0	26859.4	44	11	26	44.44	158161	72070	36264	16.8855	0.4535	Green	30837
302	P07108	ACBP_HUMAN	Acyl CoA binding protein OS Homo sapiens GN DBI PE 1 SV 2	Regular	2859.3	0	10044.4	24	4	6	39.08	95078	90051	19095	21.0984	0.2119	Green
11750	P61970	NTF2_HUMAN	Nuclear transport factor 2 OS Homo sapiens GN NUTF2 PE 1 SV 1	Regular	2803.62	0	14649.6	17	4	8	50.39	103733	90175	11970	21.1274	0.3095	Green
14183	P43487	RANG_HUMAN	Ran specific GTPase activating protein OS Homo sapiens GN RANBP1 PE 1 SV 1	Regular	2792.95	0	23481.2	27	6	14	50.75	154525	118483	40853	27.7598	0.6518	Green
7874	Q58FG1	HS904_HUMAN	Putative heat shock protein HSP 90 alpha A4 OS Homo sapiens GN HSP90AA4P PE 5 SV 1	Regular	2602.84	0	47826	34	8	36	15.79	283329	3137.18	57074	0.735	0.0352	Green	7877 7876
7749	P09429	HMGB1_HUMAN	High mobility group protein B1 OS Homo sapiens GN HMGB1 PE 1 SV 3	Regular	2410.02	0	25064.9	54	8	17	33.02	238217	72494	43230	16.9849	0.4257	Green	7750
12880	P13667	PDIA4_HUMAN	Protein disulfide isomerase A4 OS Homo sapiens GN PDIA4 PE 1 SV 2	Regular	2387.75	0	73274.7	121	26	69	39.84	465160	139071	115718	32.5834	2.3875	Green
7509	P84243	H33_HUMAN	Histone H3 3 OS Homo sapiens GN H3F3A PE 1 SV 2	Regular	2301.33	0	15385	27	4	12	22.06	111894	82390	24745	19.3035	0.297	Green	7510
5229	P24534	EF1B_HUMAN	Elongation factor 1 beta OS Homo sapiens GN EEF1B2 PE 1 SV 3	Regular	2266.4	0	24934.8	36	6	19	41.33	169195	117443	38252	27.5161	0.6861	Green
881	P08758	ANXA5_HUMAN	Annexin A5 OS Homo sapiens GN ANXA5 PE 1 SV 2	Regular	2212.93	0	35993.9	52	12	29	42.19	162450	70067	39439	16.4163	0.5909	Green	753 752
1029	P84077	ARF1_HUMAN	ADP ribosylation factor 1 OS Homo sapiens GN ARF1 PE 1 SV 2	Regular	2182.55	0	20753.8	30	7	14	48.62	82458	47418.3	16760	11.1098	0.2306	Green	1031
7800	Q14103	HNRPD_HUMAN	Heterogeneous nuclear ribonucleoprotein D0 OS Homo sapiens GN HNRNPD PE 1 SV 1	Regular	2144.27	0	38605.3	42	9	24	24.23	170172	113209	34028	26.5241	1.024	Green	7792
17494	P29401	TKT_HUMAN	Transketolase OS Homo sapiens GN TKT PE 1 SV 3	Regular	2079.2	0	68562.1	68	13	42	31.14	226049	90650	70536	21.2387	1.4562	Green
10083	P43355	MAGA1_HUMAN	Melanoma associated antigen 1 OS Homo sapiens GN MAGEA1 PE 1 SV 1	Regular	2042.21	0	34627.2	24	5	23	12.62	243450	8485.42	56518	1.9881	0.0688	Green	10103 10096 10086
5094	P33316	DUT_HUMAN	Deoxyuridine 5 triphosphate nucleotidohydrolase mitochondrial OS Homo sapiens GN DUT PE 1 SV 4	Regular	2010.76	0	26848.4	31	10	18	31.75	101319	69349	34010	16.248	0.4362	Green
6059	Q01469	FABP5_HUMAN	Fatty acid binding protein epidermal OS Homo sapiens GN FABP5 PE 1 SV 3	Regular	1991.44	0	15506.6	31	7	14	55.56	144469	87153	26609	20.4194	0.3166	Green
5232	P26641	EF1G_HUMAN	Elongation factor 1 gamma OS Homo sapiens GN EEF1G PE 1 SV 3	Regular	1950.91	0	50461	59	12	37	31.81	275084	131941	54881	30.9129	1.5599	Green
13981	P31939	PUR9_HUMAN	Bifunctional purine biosynthesis protein PURH OS Homo sapiens GN ATIC PE 1 SV 3	Regular	1922.11	0	65129.2	73	19	55	44.76	182622	52684	52957	12.3435	0.8039	Green
7457	P16403	H12_HUMAN	Histone H1 2 OS Homo sapiens GN HIST1H1C PE 1 SV 2	Regular	1779.49	0	21364.8	36	6	20	26.76	278166	148612	55367	34.8188	0.7439	Green
664	P15121	ALDR_HUMAN	Aldose reductase OS Homo sapiens GN AKR1B1 PE 1 SV 3	Regular	1767.72	0	36252.6	44	10	22	33.86	161696	67515.6	26573	15.8185	0.5735	Green	599
7741	Q01581	HMCS1_HUMAN	Hydroxymethylglutaryl CoA synthase cytoplasmic OS Homo sapiens GN HMGCS1 PE 1 SV 2	Regular	1739.06	0	57864	65	14	40	35.58	302238	113891	60896	26.6839	1.544	Green	7742
12558	Q9UQ80	PA2G4_HUMAN	Proliferation associated protein 2G4 OS Homo sapiens GN PA2G4 PE 1 SV 3	Regular	1719.18	0	44129.1	50	13	32	39.85	178167	71150	36610	16.67	0.7356	Green
7793	P31943	HNRH1_HUMAN	Heterogeneous nuclear ribonucleoprotein H OS Homo sapiens GN HNRNPH1 PE 1 SV 4	Regular	1716.52	0	49514.7	42	9	27	29.62	132088	42152.6	30594	9.8761	0.489	Green	7794 7801
12720	Q15366	PCBP2_HUMAN	Poly rC binding protein 2 OS Homo sapiens GN PCBP2 PE 1 SV 1	Regular	1700.02	0	38979.4	29	8	24	24.93	132401	57069	22556	13.3709	0.5212	Green	12719
5231	P29692	EF1D_HUMAN	Elongation factor 1 delta OS Homo sapiens GN EEF1D PE 1 SV 5	Regular	1697.81	0	31235.9	31	7	26	30.96	85493	53297	23136	12.4871	0.39	Green	5119
12719	Q15365	PCBP1_HUMAN	Poly rC binding protein 1 OS Homo sapiens GN PCBP1 PE 1 SV 2	Regular	1647.53	0	38011.1	28	6	24	23.31	104078	69585.9	27560	16.3035	0.6197	Green	12720
9184	P30613	KPYR_HUMAN	Pyruvate kinase isozymes R L OS Homo sapiens GN PKLR PE 1 SV 2	Regular	1625.09	0	62229.5	38	7	47	14.11	270224	21751.6	82925	5.0963	0.3171	Green	9183
950	P27695	APEX1_HUMAN	DNA apurinic or apyrimidinic site lyase OS Homo sapiens GN APEX1 PE 1 SV 2	Regular	1620.57	0	35953.7	32	9	21	36.16	78204	34894	22826	8.1754	0.2939	Green
574	O95433	AHSA1_HUMAN	Activator of 90 kDa heat shock protein ATPase homolog 1 OS Homo sapiens GN AHSA1 PE 1 SV 1	Regular	1613.52	0	38445.5	32	7	29	28.99	110787	91142	21967	21.354	0.821	Green
15018	P62277	RS13_HUMAN	40S ribosomal protein S13 OS Homo sapiens GN RPS13 PE 1 SV 2	Regular	1587.84	0	17222.3	15	3	13	25.17	37288	49038	6517	11.4893	0.1979	Green
12879	P30101	PDIA3_HUMAN	Protein disulfide isomerase A3 OS Homo sapiens GN PDIA3 PE 1 SV 4	Regular	1567.63	0	57181.6	65	17	49	33.86	212067	81739	52365	19.1509	1.0951	Green
13343	P13797	PLST_HUMAN	Plastin 3 OS Homo sapiens GN PLS3 PE 1 SV 4	Regular	1556.77	0	71324.4	59	13	56	23.17	228487	23145.3	64957	5.4228	0.3868	Green	13341 13342
17035	P37837	TALDO_HUMAN	Transaldolase OS Homo sapiens GN TALDO1 PE 1 SV 2	Regular	1540.36	0	37711.3	46	14	29	36.2	142432	62302	27543	14.597	0.5505	Green
2115	Q01518	CAP1_HUMAN	Adenylyl cyclase associated protein 1 OS Homo sapiens GN CAP1 PE 1 SV 5	Regular	1488.95	0	52357.8	58	17	44	37.47	198732	63502	50984	14.8781	0.779	Green
6240	P39748	FEN1_HUMAN	Flap endonuclease 1 OS Homo sapiens GN FEN1 PE 1 SV 1	Regular	1425.56	0	42935.2	37	7	26	21.58	96189	54443	24874	12.7556	0.5477	Green
11792	P19338	NUCL_HUMAN	Nucleolin OS Homo sapiens GN NCL PE 1 SV 3	Regular	1406.59	0	76671.5	68	17	59	20.85	298777	95920	58284	22.4734	1.7231	Green	21624 17291
7801	P52597	HNRPF_HUMAN	Heterogeneous nuclear ribonucleoprotein F OS Homo sapiens GN HNRNPF PE 1 SV 3	Regular	1405.57	0	46014.1	33	8	26	18.31	79040	22699.5	27479	5.3183	0.2447	Green	7794 7793
7510	Q6NXT2	H3C_HUMAN	Histone H3 3C OS Homo sapiens GN H3F3C PE 1 SV 3	Regular	1386.95	0	15327.8	20	3	11	17.04	89600	0	19119			Green	7509
6627	P06744	G6PI_HUMAN	Glucose 6 phosphate isomerase OS Homo sapiens GN GPI PE 1 SV 4	Regular	1374.67	0	63375.4	53	13	40	27.78	251061	88330	40166	20.6952	1.3116	Green
17204	P50990	TCPQ_HUMAN	T complex protein 1 subunit theta OS Homo sapiens GN CCT8 PE 1 SV 4	Regular	1357.83	0	60191	66	17	52	33.76	185244	55384	46517	12.9761	0.781	Green
5108	Q13838	DX39B_HUMAN	Spliceosome RNA helicase DDX39B OS Homo sapiens GN DDX39B PE 1 SV 1	Regular	1340.68	0	49447.7	56	12	37	32.01	369954	83617	74671	19.5909	0.9687	Green
1031	P18085	ARF4_HUMAN	ADP ribosylation factor 4 OS Homo sapiens GN ARF4 PE 1 SV 3	Regular	1338.89	0	20624.9	14	4	15	28.89	31512	8059.98	9394	1.8884	0.0389	Green	1029
145	P52209	6PGD_HUMAN	6 phosphogluconate dehydrogenase decarboxylating OS Homo sapiens GN PGD PE 1 SV 3	Regular	1283.88	0	53653.3	42	9	36	23.4	151645	74549	37331	17.4664	0.9371	Green
9882	P33241	LSP1_HUMAN	Lymphocyte specific protein 1 OS Homo sapiens GN LSP1 PE 1 SV 1	Regular	1278.65	0	37419.7	32	8	26	43.07	130921	76989	31986	18.038	0.675	Green
15026	P39019	RS19_HUMAN	40S ribosomal protein S19 OS Homo sapiens GN RPS19 PE 1 SV 2	Regular	1256.19	0	16060.5	29	8	17	35.86	89650	64266	22227	15.0571	0.2418	Green	20451
13864	Q06323	PSME1_HUMAN	Proteasome activator complex subunit 1 OS Homo sapiens GN PSME1 PE 1 SV 1	Regular	1246.21	0	28894.2	32	8	26	27.31	130861	76487	18686	17.9204	0.5178	Green	9301
15046	P46782	RS5_HUMAN	40S ribosomal protein S5 OS Homo sapiens GN RPS5 PE 1 SV 4	Regular	1232.59	0	23047.5	19	5	16	27.45	50124	38350	13749	8.9852	0.2071	Green
13671	Q13162	PRDX4_HUMAN	Peroxiredoxin 4 OS Homo sapiens GN PRDX4 PE 1 SV 1	Regular	1213.69	0	30768	17	5	20	27.68	136696	11142.4	38657	2.6106	0.0803	Green	13668
16650	P31948	STIP1_HUMAN	Stress induced phosphoprotein 1 OS Homo sapiens GN STIP1 PE 1 SV 1	Regular	1192.48	0	63266.7	52	15	64	26.7	162207	65420	36774	15.3275	0.9697	Green
13817	O14818	PSA7_HUMAN	Proteasome subunit alpha type 7 OS Homo sapiens GN PSMA7 PE 1 SV 1	Regular	1165.4	0	28058	19	7	23	35.89	73760	49227	13738	11.5336	0.3236	Green
7794	P55795	HNRH2_HUMAN	Heterogeneous nuclear ribonucleoprotein H2 OS Homo sapiens GN HNRNPH2 PE 1 SV 1	Regular	1164.94	0	49548.8	30	6	27	14.03	99310	46985.2	19642	11.0083	0.5454	Green	7801 7793
3371	O00299	CLIC1_HUMAN	Chloride intracellular channel protein 1 OS Homo sapiens GN CLIC1 PE 1 SV 4	Regular	1161.25	0	27264.9	24	9	20	39.42	102812	43032	25119	10.0821	0.2749	Green
15050	P46781	RS9_HUMAN	40S ribosomal protein S9 OS Homo sapiens GN RPS9 PE 1 SV 3	Regular	1133.91	0	22648.5	22	6	17	25.77	91033	53682	20910	12.5774	0.2849	Green
17072	Q9H853	TBA4B_HUMAN	Putative tubulin like protein alpha 4B OS Homo sapiens GN TUBA4B PE 5 SV 2	Regular	1123.97	0	27836.4	18	4	17	16.6	170037	120188	43327	28.1593	0.7839	Green	17067
16779	P49588	SYAC_HUMAN	Alanine tRNA ligase cytoplasmic OS Homo sapiens GN AARS PE 1 SV 2	Regular	1074.45	0	107552	73	22	82	25.1	239339	77813	54691	18.2311	1.9608	Green	10445
10090	P43362	MAGA9_HUMAN	Melanoma associated antigen 9 OS Homo sapiens GN MAGEA9 PE 2 SV 1	Regular	1061.67	0	35316.5	27	6	21	22.86	141745	21638.5	57913	5.0698	0.179	Green	10086
14710	P05388	RLA0_HUMAN	60S acidic ribosomal protein P0 OS Homo sapiens GN RPLP0 PE 1 SV 1	Regular	1038.63	0	34444.7	21	6	20	23.97	58999	43866	14151	10.2775	0.354	Green
19126	P12956	XRCC6_HUMAN	X ray repair cross complementing protein 6 OS Homo sapiens GN XRCC6 PE 1 SV 2	Regular	1025.16	0	70128.3	53	14	56	28.74	174616	74156	31610	17.3743	1.2184	Green
16067	P62314	SMD1_HUMAN	Small nuclear ribonucleoprotein Sm D1 OS Homo sapiens GN SNRPD1 PE 1 SV 1	Regular	1000.37	0	13281.6	11	3	6	27.73	16878	16878	7786	3.9544	0.0525	Green
10096	O15480	MAGB3_HUMAN	Melanoma associated antigen B3 OS Homo sapiens GN MAGEB3 PE 2 SV 2	Regular	995.601	0	39381.8	15	3	34	8.38	128722	8734.04	38594	2.0463	0.0806	Green	10103 10086 10083
7896	P34932	HSP74_HUMAN	Heat shock 70 kDa protein 4 OS Homo sapiens GN HSPA4 PE 1 SV 4	Regular	989.219	0	95186.5	52	13	74	18.21	118669	49067	32338	11.4961	1.0943	Green	7860
15049	P62241	RS8_HUMAN	40S ribosomal protein S8 OS Homo sapiens GN RPS8 PE 1 SV 2	Regular	964.703	0	24490.3	23	9	16	47.12	63194	40233	17413	9.4263	0.2309	Green
10103	Q96M61	MAGBI_HUMAN	Melanoma associated antigen B18 OS Homo sapiens GN MAGEB18 PE 1 SV 2	Regular	954.101	0	38760.9	20	5	26	11.95	133257	9224.9	38632	2.1613	0.0838	Green	10096 10086 10083
7860	Q92598	HS105_HUMAN	Heat shock protein 105 kDa OS Homo sapiens GN HSPH1 PE 1 SV 1	Regular	936.634	0	97777.6	63	16	70	24.24	167145	56244	43372	13.1776	1.2885	Green	7896
2659	Q16543	CDC37_HUMAN	Hsp90 co chaperone Cdc37 OS Homo sapiens GN CDC37 PE 1 SV 1	Regular	926.256	0	44981.6	20	6	31	20.9	60314	33506	14794	7.8502	0.3531	Green
17196	P17987	TCPA_HUMAN	T complex protein 1 subunit alpha OS Homo sapiens GN TCP1 PE 1 SV 1	Regular	901.776	0	60856.9	46	16	46	28.96	173448	64963	33009	15.2204	0.9263	Green
6837	P50395	GDIB_HUMAN	Rab GDP dissociation inhibitor beta OS Homo sapiens GN GDI2 PE 1 SV 2	Regular	900.573	0	51119.6	29	11	42	26.97	115753	50023	25299	11.7201	0.5991	Green
394	P12814	ACTN1_HUMAN	Alpha actinin 1 OS Homo sapiens GN ACTN1 PE 1 SV 2	Regular	896.334	0	103628	80	18	76	22.87	261642	51256.7	57335	12.0091	1.2445	Green	397 395 396
2987	P61604	CH10_HUMAN	10 kDa heat shock protein mitochondrial OS Homo sapiens GN HSPE1 PE 1 SV 2	Regular	876.338	0	10931.7	10	3	12	32.35	32677	24469	9264	5.7329	0.0627	Green
15048	P62081	RS7_HUMAN	40S ribosomal protein S7 OS Homo sapiens GN RPS7 PE 1 SV 1	Regular	813.444	0	22126.9	17	5	21	26.29	56480	46415	6447	10.8747	0.2406	Green
6118	P49327	FAS_HUMAN	Fatty acid synthase OS Homo sapiens GN FASN PE 1 SV 3	Regular	800.381	0	276050	170	44	178	21.51	463178	66393	131760	15.5555	4.2941	Green
397	O43707	ACTN4_HUMAN	Alpha actinin 4 OS Homo sapiens GN ACTN4 PE 1 SV 2	Regular	799.98	0	105310	60	16	86	20.53	231372	32155.3	50012	7.5338	0.7934	Green	395 394 396
8124	P41091	IF2G_HUMAN	Eukaryotic translation initiation factor 2 subunit 3 OS Homo sapiens GN EIF2S3 PE 1 SV 3	Regular	798.152	0	51679.8	21	7	33	21.61	47709	21358	11297	5.004	0.2586	Green
10298	P40926	MDHM_HUMAN	Malate dehydrogenase mitochondrial OS Homo sapiens GN MDH2 PE 1 SV 3	Regular	792.401	0	35959.6	22	7	28	20.41	89611	53726	12353	12.5877	0.4526	Green
810	Q99873	ANM1_HUMAN	Protein arginine N methyltransferase 1 OS Homo sapiens GN PRMT1 PE 1 SV 2	Regular	773.139	0	42085.9	25	5	31	16.62	87115	64453	23447	15.1009	0.6355	Green
17197	P78371	TCPB_HUMAN	T complex protein 1 subunit beta OS Homo sapiens GN CCT2 PE 1 SV 4	Regular	759.175	0	57830.5	41	11	47	21.12	95685	54920	24157	12.8674	0.7441	Green
3478	P62633	CNBP_HUMAN	Cellular nucleic acid binding protein OS Homo sapiens GN CNBP PE 1 SV 1	Regular	730.803	0	20717.3	7	2	25	15.82	11919	17878.5	6787	4.1888	0.0868	Green
7806	O43390	HNRPR_HUMAN	Heterogeneous nuclear ribonucleoprotein R OS Homo sapiens GN HNRNPR PE 1 SV 1	Regular	715.841	0	71228.3	44	15	51	21.48	175926	75653	32288	17.725	1.2625	Green
6839	P52566	GDIR2_HUMAN	Rho GDP dissociation inhibitor 2 OS Homo sapiens GN ARHGDIB PE 1 SV 3	Regular	713.717	0	23045.1	19	5	21	29.35	66504	36229	14323	8.4882	0.1956	Green	6838
13810	P25786	PSA1_HUMAN	Proteasome subunit alpha type 1 OS Homo sapiens GN PSMA1 PE 1 SV 1	Regular	708.409	0	29840.8	35	11	25	29.66	112211	35460	25486	8.308	0.2479	Green
17200	P49368	TCPG_HUMAN	T complex protein 1 subunit gamma OS Homo sapiens GN CCT3 PE 1 SV 4	Regular	692.822	0	61104.3	51	17	48	32.48	149827	51877	30458	12.1545	0.7427	Green
15039	P15880	RS2_HUMAN	40S ribosomal protein S2 OS Homo sapiens GN RPS2 PE 1 SV 2	Regular	682.419	0	31609.6	30	9	27	22.87	99516	40293	19173	9.4404	0.2984	Green	4549
13504	P24666	PPAC_HUMAN	Low molecular weight phosphotyrosine protein phosphatase OS Homo sapiens GN ACP1 PE 1 SV 3	Regular	681.615	0	18498.7	14	3	14	20.89	37292	33538	11151	7.8577	0.1454	Green
15033	P62854	RS26_HUMAN	40S ribosomal protein S26 OS Homo sapiens GN RPS26 PE 1 SV 3	Regular	680.724	0	13300.6	7	2	6	20.87	27136	39504	6479	9.2555	0.1231	Green
659	P02768	ALBU_HUMAN	Serum albumin OS Homo sapiens GN ALB PE 1 SV 2	Regular	679.504	0	71362.7	47	10	55	14.12	401246	210398	83529	49.2949	3.5178	Green
10517	P28482	MK01_HUMAN	Mitogen activated protein kinase 1 OS Homo sapiens GN MAPK1 PE 1 SV 3	Regular	673.939	0	41789	14	6	28	19.17	33153	23129	8248	5.419	0.2265	Green	10518
18668	Q86UX7	URP2_HUMAN	Fermitin family homolog 3 OS Homo sapiens GN FERMT3 PE 1 SV 1	Regular	669.406	0	76523.2	44	14	45	24.59	78406	33961	19640	7.9568	0.6089	Green
7792	O14979	HNRDL_HUMAN	Heterogeneous nuclear ribonucleoprotein D like OS Homo sapiens GN HNRPDL PE 1 SV 3	Regular	645.026	0	46608.7	21	4	30	8.1	82315	51655.6	19062	12.1026	0.5641	Green	7800
6700	Q14697	GANAB_HUMAN	Neutral alpha glucosidase AB OS Homo sapiens GN GANAB PE 1 SV 3	Regular	641.169	0	107330	50	13	69	16.21	115571	42935	28210	10.0594	1.0797	Green
14889	P51991	ROA3_HUMAN	Heterogeneous nuclear ribonucleoprotein A3 OS Homo sapiens GN HNRNPA3 PE 1 SV 2	Regular	639.105	0	39823.1	20	6	32	15.34	96551	53900	10890	12.6284	0.5029	Green	14887
12882	Q15084	PDIA6_HUMAN	Protein disulfide isomerase A6 OS Homo sapiens GN PDIA6 PE 1 SV 1	Regular	635.109	0	48520.6	32	10	35	21.82	141713	55531	16581	13.0106	0.6313	Green
14304	P49792	RBP2_HUMAN	E3 SUMO protein ligase RanBP2 OS Homo sapiens GN RANBP2 PE 1 SV 2	Regular	629.863	0	362591	46	27	264	5.61	142007	25982	57275	6.0874	2.2072	Green	13526
1864	P11586	C1TC_HUMAN	C 1 tetrahydrofolate synthase cytoplasmic OS Homo sapiens GN MTHFD1 PE 1 SV 3	Regular	625.774	0	102244	64	20	73	19.79	189571	58102	46496	13.6129	1.3918	Green
14330	Q9P258	RCC2_HUMAN	Protein RCC2 OS Homo sapiens GN RCC2 PE 1 SV 2	Regular	617.246	0	56826	44	11	44	22.99	167857	65290	31562	15.297	0.8693	Green
15015	P46783	RS10_HUMAN	40S ribosomal protein S10 OS Homo sapiens GN RPS10 PE 1 SV 1	Regular	601.106	0	18897.8	10	4	18	18.18	30919	26765	4359	6.2709	0.1185	Green
6345	Q02790	FKBP4_HUMAN	Peptidyl prolyl cis trans isomerase FKBP4 OS Homo sapiens GN FKBP4 PE 1 SV 3	Regular	593.132	0	52089.8	30	13	40	27.02	111227	43238	22772	10.1304	0.5277	Green
8333	Q14974	IMB1_HUMAN	Importin subunit beta 1 OS Homo sapiens GN KPNB1 PE 1 SV 2	Regular	587	0	98482	36	12	62	18.84	113954	42965	24177	10.0664	0.9914	Green
1492	O00154	BACH_HUMAN	Cytosolic acyl coenzyme A thioester hydrolase OS Homo sapiens GN ACOT7 PE 1 SV 3	Regular	583.978	0	42480.4	17	7	26	19.21	31136	22186	6659	5.198	0.2208	Green
756	Q9BTT0	AN32E_HUMAN	Acidic leucine rich nuclear phosphoprotein 32 family member E OS Homo sapiens GN ANP32E PE 1 SV 1	Regular	582.081	0	30920.6	20	4	11	19.78	56086	43116	18171	10.1018	0.3124	Green
11122	P49321	NASP_HUMAN	Nuclear autoantigenic sperm protein OS Homo sapiens GN NASP PE 1 SV 2	Regular	565.273	0	85523	53	16	78	31.35	152658	53117	43785	12.445	1.0643	Green
10632	P26038	MOES_HUMAN	Moesin OS Homo sapiens GN MSN PE 1 SV 3	Regular	562.875	0	67934.2	42	16	63	20.8	157727	50995.1	26717	11.9478	0.8117	Green	5669
13977	P22102	PUR2_HUMAN	Trifunctional purine biosynthetic protein adenosine 3 OS Homo sapiens GN GART PE 1 SV 1	Regular	557.626	0	109022	64	18	77	22.67	136539	42482	37892	9.9533	1.0851	Green
9454	P05455	LA_HUMAN	Lupus La protein OS Homo sapiens GN SSB PE 1 SV 2	Regular	557.116	0	47008.2	36	11	46	28.43	89954	39588	15442	9.2752	0.436	Green
3369	Q00610	CLH1_HUMAN	Clathrin heavy chain 1 OS Homo sapiens GN CLTC PE 1 SV 5	Regular	543.591	0	193383	99	28	133	19.88	265058	53112.7	61992	12.444	2.4064	Green	3370
13886	P26599	PTBP1_HUMAN	Polypyrimidine tract binding protein 1 OS Homo sapiens GN PTBP1 PE 1 SV 1	Regular	531.921	0	57392.5	38	10	34	21.85	97793	52977	24598	12.4122	0.7124	Green
336	P53396	ACLY_HUMAN	ATP citrate synthase OS Homo sapiens GN ACLY PE 1 SV 3	Regular	530.918	0	121752	42	17	92	11.17	90804	37041	23545	8.6785	1.0566	Green
1025	O15143	ARC1B_HUMAN	Actin related protein 2 3 complex subunit 1B OS Homo sapiens GN ARPC1B PE 1 SV 3	Regular	524.718	0	41748.2	23	8	28	22.85	53759	17846	18945	4.1812	0.1746	Green
16422	P52788	SPSY_HUMAN	Spermine synthase OS Homo sapiens GN SMS PE 1 SV 2	Regular	489.185	0	41724.5	15	6	31	25.68	21174	15459	5965	3.6219	0.1511	Green
11807	Q9Y266	NUDC_HUMAN	Nuclear migration protein nudC OS Homo sapiens GN NUDC PE 1 SV 1	Regular	471.593	0	38300	19	7	31	21.75	88985	60431	14980	14.1586	0.5423	Green
4986	Q16555	DPYL2_HUMAN	Dihydropyrimidinase related protein 2 OS Homo sapiens GN DPYSL2 PE 1 SV 1	Regular	463.044	0	62749.9	26	8	43	21.85	60477	31024	16972	7.2687	0.4561	Green
8318	Q12906	ILF3_HUMAN	Interleukin enhancer binding factor 3 OS Homo sapiens GN ILF3 PE 1 SV 3	Regular	437.777	0	95737.7	34	10	57	11.74	116636	36412	21770	8.5311	0.8167	Green
13341	Q14651	PLSI_HUMAN	Plastin 1 OS Homo sapiens GN PLS1 PE 1 SV 2	Regular	432.732	0	70652.8	20	8	51	9.06	118335	10031	36192	2.3502	0.166	Green	13343 13342
13861	Q15008	PSMD6_HUMAN	26S proteasome non ATPase regulatory subunit 6 OS Homo sapiens GN PSMD6 PE 1 SV 1	Regular	400.623	0	45816.6	23	7	40	11.83	53516	21115	11995	4.9471	0.2267	Green
723	Q9H4A4	AMPB_HUMAN	Aminopeptidase B OS Homo sapiens GN RNPEP PE 1 SV 2	Regular	399.165	0	73280.2	24	10	49	12.31	50646	22798	14513	5.3414	0.3914	Green
13813	P25789	PSA4_HUMAN	Proteasome subunit alpha type 4 OS Homo sapiens GN PSMA4 PE 1 SV 1	Regular	398.748	0	29769	11	4	25	23.75	16772	11604	6981	2.7187	0.0809	Yellow
6294	Q08830	FGL1_HUMAN	Fibrinogen like protein 1 OS Homo sapiens GN FGL1 PE 1 SV 3	Regular	392.537	0	36664.7	11	5	21	7.69	314674	283547	49166	66.4332	2.4358	Green
13744	P60891	PRPS1_HUMAN	Ribose phosphate pyrophosphokinase 1 OS Homo sapiens GN PRPS1 PE 1 SV 2	Regular	371.404	0	35347.5	11	3	22	10.06	36801	23115	4602	5.4157	0.1914	Green	13745
395	P35609	ACTN2_HUMAN	Alpha actinin 2 OS Homo sapiens GN ACTN2 PE 1 SV 1	Regular	370.692	0	104424	46	12	79	13.65	110003	3752.97	26461	0.8793	0.0918	Green	397 394 396
6539	Q92945	FUBP2_HUMAN	Far upstream element binding protein 2 OS Homo sapiens GN KHSRP PE 1 SV 4	Regular	366.822	0	73400.6	32	9	48	14.49	82942	35947.8	18940	8.4223	0.6182	Green	6538
8335	P12268	IMDH2_HUMAN	Inosine 5 monophosphate dehydrogenase 2 OS Homo sapiens GN IMPDH2 PE 1 SV 2	Regular	363.058	0.46	56261.3	37	13	41	19.26	121603	29815.1	20626	6.9855	0.393	Green	37348 31792 16018 1067 8602
13745	P11908	PRPS2_HUMAN	Ribose phosphate pyrophosphokinase 2 OS Homo sapiens GN PRPS2 PE 1 SV 2	Regular	356.164	0.46	35168.4	12	4	23	16.35	120128	20054	7128	4.6985	0.1652	Green	13744
5669	P15311	EZRI_HUMAN	Ezrin OS Homo sapiens GN EZR PE 1 SV 4	Regular	353.504	0.45	69527	37	15	74	17.06	132183	36062.9	30111	8.4493	0.5875	Green	10632
17199	P48643	TCPE_HUMAN	T complex protein 1 subunit epsilon OS Homo sapiens GN CCT5 PE 1 SV 1	Regular	344.111	0.45	60127.4	23	11	49	19.41	81166	37757	25697	8.8462	0.5319	Green
18814	Q9BXE9	VN1R3_HUMAN	Vomeronasal type 1 receptor 3 OS Homo sapiens GN VN1R3 PE 2 SV 1	Regular	339.885	0.45	35340.5	3	1	17	3.86	9788	29364	4235	6.8798	0.2431	Green
19125	P13010	XRCC5_HUMAN	X ray repair cross complementing protein 5 OS Homo sapiens GN XRCC5 PE 1 SV 3	Regular	339.778	0.45	83275	27	10	62	7.65	112896	56223	21386	13.1727	1.097	Green
16879	P23381	SYWC_HUMAN	Tryptophan tRNA ligase cytoplasmic OS Homo sapiens GN WARS PE 1 SV 2	Regular	332.179	0.45	53507.7	16	6	44	19.32	39066	31518	10332	7.3845	0.3951	Green
17393	Q9BWD1	THIC_HUMAN	Acetyl CoA acetyltransferase cytosolic OS Homo sapiens GN ACAT2 PE 1 SV 2	Regular	323.23	0.44	41864.2	22	7	27	14.86	39558	17833	9099	4.1782	0.1749	Yellow
13825	P28070	PSB4_HUMAN	Proteasome subunit beta type 4 OS Homo sapiens GN PSMB4 PE 1 SV 4	Regular	323.021	0.44	29261.4	13	4	16	17.42	32731	26395	5352	6.1842	0.181	Green	3437 16073
16794	P14868	SYDC_HUMAN	Aspartate tRNA ligase cytoplasmic OS Homo sapiens GN DARS PE 1 SV 2	Regular	318.585	0.44	57535.5	28	13	49	20.96	110412	25943	24637	6.0783	0.3497	Yellow
15038	P62273	RS29_HUMAN	40S ribosomal protein S29 OS Homo sapiens GN RPS29 PE 1 SV 2	Regular	317.841	0.44	6904.89	7	1	5	19.64	13559	25773	2489	6.0384	0.0417	Yellow
599	C9JRZ8	AK1BF_HUMAN	Aldo keto reductase family 1 member B15 OS Homo sapiens GN AKR1B15 PE 2 SV 1	Regular	307.383	0.44	39631.4	12	6	27	6.69	61081	8055.58	8162	1.8874	0.0748	Green	664
16823	O43776	SYNC_HUMAN	Asparagine tRNA ligase cytoplasmic OS Homo sapiens GN NARS PE 1 SV 1	Regular	292.152	0.87	63798.4	25	10	45	10.4	90524	29932	24312	7.0129	0.4474	Green
14299	P38159	RBMX_HUMAN	RNA binding motif protein X chromosome OS Homo sapiens GN RBMX PE 1 SV 3	Regular	291.988	0.86	42331.9	15	7	99	15.6	65230	35605	9225	8.342	0.3531	Green
396	Q08043	ACTN3_HUMAN	Alpha actinin 3 OS Homo sapiens GN ACTN3 PE 1 SV 2	Regular	287.222	0.86	103983	34	13	79	8.66	100606	5136.18	31699	1.2034	0.1251	Green	397 395 394
8427	O00410	IPO5_HUMAN	Importin 5 OS Homo sapiens GN IPO5 PE 1 SV 4	Regular	286.261	0.85	125113	21	9	78	10.57	51891	29130	14319	6.825	0.8539	Green
15750	Q15393	SF3B3_HUMAN	Splicing factor 3B subunit 3 OS Homo sapiens GN SF3B3 PE 1 SV 4	Regular	285.531	0.85	136661	36	12	72	8.3	85258	30772	20513	7.2097	0.9853	Green
5140	P00374	DYR_HUMAN	Dihydrofolate reductase OS Homo sapiens GN DHFR PE 1 SV 2	Regular	274.628	0.85	21509.8	13	6	19	25.13	28448	22179	9377	5.1964	0.1118	Green
12989	Q9UHV9	PFD2_HUMAN	Prefoldin subunit 2 OS Homo sapiens GN PFDN2 PE 1 SV 1	Regular	271.523	0.84	16704.9	6	1	19	9.09	11177	33531	2327	7.8561	0.1312	Yellow
16812	Q15046	SYK_HUMAN	Lysine tRNA ligase OS Homo sapiens GN KARS PE 1 SV 3	Regular	261.755	1.26	68504.4	32	11	45	15.91	159851	34633	31828	8.1143	0.5559	Yellow
17506	Q9Y490	TLN1_HUMAN	Talin 1 OS Homo sapiens GN TLN1 PE 1 SV 3	Regular	260.559	1.25	271935	79	28	208	12.83	198705	36302	58618	8.5053	2.3129	Green	17507
8021	P07099	HYEP_HUMAN	Epoxide hydrolase 1 OS Homo sapiens GN EPHX1 PE 1 SV 1	Regular	257.101	1.24	53177.1	12	4	39	1.54	10851	7824	5807	1.8331	0.0975	Green
18266	A6NLP5	TTC36_HUMAN	Tetratricopeptide repeat protein 36 OS Homo sapiens GN TTC36 PE 2 SV 1	Regular	256.729	1.24	21010.6	7	5	17	16.4	88300	71014	10907	16.6381	0.3496	Yellow
18406	Q15029	U5S1_HUMAN	116 kDa U5 small nuclear ribonucleoprotein component OS Homo sapiens GN EFTUD2 PE 1 SV 1	Regular	253.835	1.23	110405	16	7	73	2.47	76077	4250.66	21399	0.9959	0.11	Green	5234
4743	Q08211	DHX9_HUMAN	ATP dependent RNA helicase A OS Homo sapiens GN DHX9 PE 1 SV 4	Regular	251.208	1.23	142270	33	11	99	10.87	73566	31748	19943	7.4384	1.0583	Green
7742	P54868	HMCS2_HUMAN	Hydroxymethylglutaryl CoA synthase mitochondrial OS Homo sapiens GN HMGCS2 PE 1 SV 1	Regular	249.636	1.22	57148.8	14	5	33	3.74	46774	4404.47	9685	1.0319	0.059	Green	7741
5119	Q8TE73	DYH5_HUMAN	Dynein heavy chain 5 axonemal OS Homo sapiens GN DNAH5 PE 1 SV 3	Regular	243.626	1.22	532843	35	17	386	1.82	89205	18887	27640	4.4251	2.3579	Green	5122 5231
7024	P14314	GLU2B_HUMAN	Glucosidase 2 subunit beta OS Homo sapiens GN PRKCSH PE 1 SV 2	Regular	236.084	1.21	60395	20	8	41	15.34	44800	18031	22458	4.2245	0.2551	Green
16876	P26640	SYVC_HUMAN	Valine tRNA ligase OS Homo sapiens GN VARS PE 1 SV 4	Regular	231.649	1.21	141731	49	22	90	14.4	105902	26495	35879	6.2076	0.8798	Green
2991	P10809	CH60_HUMAN	60 kDa heat shock protein mitochondrial OS Homo sapiens GN HSPD1 PE 1 SV 2	Regular	229.717	1.2	61225.9	18	6	53	10.12	33790	27431	12447	6.4269	0.3935	Yellow
662	P05062	ALDOB_HUMAN	Fructose bisphosphate aldolase B OS Homo sapiens GN ALDOB PE 1 SV 2	Regular	227.214	1.2	39986.3	12	6	31	9.89	63111	4485.12	12967	1.0508	0.042	Green	663 661
9302	P51812	KS6A3_HUMAN	Ribosomal protein S6 kinase alpha 3 OS Homo sapiens GN RPS6KA3 PE 1 SV 1	Regular	217.574	1.98	84078.3	26	13	69	16.35	77632	29401	28947	6.8885	0.5792	Yellow	9301 9300
597	P14550	AK1A1_HUMAN	Alcohol dehydrogenase NADP OS Homo sapiens GN AKR1A1 PE 1 SV 3	Regular	213.286	1.97	36915.3	9	3	29	6.77	33890	49249.5	4203	11.5388	0.426	Yellow
19110	O14980	XPO1_HUMAN	Exportin 1 OS Homo sapiens GN XPO1 PE 1 SV 1	Regular	213.107	1.96	124527	34	12	87	10.74	170950	23697	38477	5.5521	0.6914	Yellow
10518	P27361	MK03_HUMAN	Mitogen activated protein kinase 3 OS Homo sapiens GN MAPK3 PE 1 SV 4	Regular	213.077	1.95	43477.8	7	5	33	7.65	15533	6577.8	6290	1.5411	0.067	Green	10517
7803	P14866	HNRPL_HUMAN	Heterogeneous nuclear ribonucleoprotein L OS Homo sapiens GN HNRNPL PE 1 SV 2	Regular	213.067	1.95	64760.2	28	8	34	9.85	64921	48800	14535	11.4335	0.7404	Yellow
12877	P07237	PDIA1_HUMAN	Protein disulfide isomerase OS Homo sapiens GN P4HB PE 1 SV 3	Regular	211.062	1.94	57515.6	26	9	50	10.83	58679	22158	12959	5.1915	0.2986	Yellow
10266	P25205	MCM3_HUMAN	DNA replication licensing factor MCM3 OS Homo sapiens GN MCM3 PE 1 SV 3	Regular	206.752	2.31	91608.3	18	9	78	11.88	37260	22115	23297	5.1814	0.4747	Yellow
11135	Q6BCY4	NB5R2_HUMAN	NADH cytochrome b5 reductase 2 OS Homo sapiens GN CYB5R2 PE 1 SV 1	Regular	204.173	2.3	31515.4	7	3	26	2.9	10791	24831	3487	5.8177	0.1833	Green
10269	Q14566	MCM6_HUMAN	DNA replication licensing factor MCM6 OS Homo sapiens GN MCM6 PE 1 SV 1	Regular	202.947	2.29	93858.9	35	12	74	13.52	74152	24295	25197	5.6922	0.5343	Yellow
15020	P62244	RS15A_HUMAN	40S ribosomal protein S15a OS Homo sapiens GN RPS15A PE 1 SV 2	Regular	202.661	2.28	14953.6	11	5	12	23.08	37642	30676	4305	7.1872	0.1075	Red
10267	P33991	MCM4_HUMAN	DNA replication licensing factor MCM4 OS Homo sapiens GN MCM4 PE 1 SV 5	Regular	197.606	2.27	97128.4	30	13	69	13.56	59371	20631	20368	4.8337	0.4695	Yellow
7288	Q4V328	GRAP1_HUMAN	GRIP1 associated protein 1 OS Homo sapiens GN GRIPAP1 PE 1 SV 1	Regular	190.56	2.63	96331.8	15	11	90	9.87	61519	38112	13721	8.9294	0.8602	Green
15713	Q9Y617	SERC_HUMAN	Phosphoserine aminotransferase OS Homo sapiens GN PSAT1 PE 1 SV 2	Regular	188.846	2.62	40821.9	14	5	29	10.81	18778	15000	8494	3.5144	0.1435	Yellow
1184	Q8WXJ9	ASB17_HUMAN	Ankyrin repeat and SOCS box protein 17 OS Homo sapiens GN ASB17 PE 2 SV 2	Regular	186.163	2.61	34909.6	9	4	25	11.53	15621	11963	5295	2.8029	0.0978	Yellow
5318	Q13347	EIF3I_HUMAN	Eukaryotic translation initiation factor 3 subunit I OS Homo sapiens GN EIF3I PE 1 SV 1	Regular	181.441	2.6	36901.1	10	5	29	15.38	16053	17197.5	5135	4.0293	0.1487	Red
1678	P12645	BMP3_HUMAN	Bone morphogenetic protein 3 OS Homo sapiens GN BMP3 PE 1 SV 2	Regular	181.032	2.59	54056.8	23	10	40	8.05	47399	23705	17559	5.5539	0.3002	Yellow
3402	Q92989	CLP1_HUMAN	Polyribonucleotide 5 hydroxyl kinase Clp1 OS Homo sapiens GN CLP1 PE 1 SV 1	Regular	177.579	2.58	48101.8	7	3	32	5.65	9992	13306.5	3159	3.1176	0.15	Yellow
12800	Q15645	PCH2_HUMAN	Pachytene checkpoint protein 2 homolog OS Homo sapiens GN TRIP13 PE 1 SV 2	Regular	176.934	2.57	48893	9	3	32	5.09	114588	32805	26524	7.686	0.3758	Green
9779	Q8N1G4	LRC47_HUMAN	Leucine rich repeat containing protein 47 OS Homo sapiens GN LRRC47 PE 1 SV 1	Regular	175.309	2.56	64043.3	26	8	48	9.95	66418	16394	17247	3.841	0.246	Yellow
16592	Q9Y2H1	ST38L_HUMAN	Serine threonine protein kinase 38 like OS Homo sapiens GN STK38L PE 1 SV 3	Regular	172.768	2.55	54231.1	12	3	46	2.8	216178	33261	20153	7.7928	0.4226	Yellow
880	P09525	ANXA4_HUMAN	Annexin A4 OS Homo sapiens GN ANXA4 PE 1 SV 4	Regular	170.985	2.55	36110.9	24	10	31	13.48	47237	12994	14528	3.0444	0.1099	Red
86	P30153	2AAA_HUMAN	Serine threonine protein phosphatase 2A 65 kDa regulatory subunit A alpha isoform OS Homo sapiens GN	Regular	170.881	2.54	66107.1	17	7	50	6.45	39140	24830	12870	5.8175	0.3846	Yellow
16799	P07814	SYEP_HUMAN	Bifunctional glutamate proline tRNA ligase OS Homo sapiens GN EPRS PE 1 SV 5	Regular	170.38	2.53	172188	36	19	128	7.74	81220	31457	18011	7.3702	1.2691	Yellow
9688	Q6ZN17	LN28B_HUMAN	Protein lin 28 homolog B OS Homo sapiens GN LIN28B PE 1 SV 1	Regular	167.716	2.87	27654	8	5	26	7.6	21459	21309	6422	4.9926	0.1381	Yellow
18321	Q5TAX3	TUT4_HUMAN	Terminal uridylyltransferase 4 OS Homo sapiens GN ZCCHC11 PE 1 SV 3	Regular	165.906	2.86	188131	31	14	162	4.14	147576	81006	32121	18.9792	3.5706	Green
5688	Q8NFI4	F10A5_HUMAN	Putative protein FAM10A5 OS Homo sapiens GN ST13P5 PE 5 SV 1	Regular	164.889	3.19	41605.9	12	7	26	8.13	46070	20692	9802	4.848	0.2017	Yellow
7825	P84074	HPCA_HUMAN	Neuron specific calcium binding protein hippocalcin OS Homo sapiens GN HPCA PE 1 SV 2	Regular	163.742	3.18	22541.5	7	4	21	8.81	4522	2421	3452	0.5672	0.0128	Red
10055	Q9NTJ4	MA2C1_HUMAN	Alpha mannosidase 2C1 OS Homo sapiens GN MAN2C1 PE 1 SV 1	Regular	162.464	3.17	117033	14	6	65	2.5	139805	178062	24444	41.7188	4.8825	Green
13833	O00231	PSD11_HUMAN	26S proteasome non ATPase regulatory subunit 11 OS Homo sapiens GN PSMD11 PE 1 SV 3	Regular	161.112	3.16	47749	17	8	38	8.77	40962	18071	10416	4.2339	0.2022	Yellow
8722	P35900	K1C20_HUMAN	Keratin type I cytoskeletal 20 OS Homo sapiens GN KRT20 PE 1 SV 1	Regular	156.393	3.48	48543.7	11	8	39	13.68	33098	14548	10519	3.4085	0.1655	Red
5466	Q09472	EP300_HUMAN	Histone acetyltransferase p300 OS Homo sapiens GN EP300 PE 1 SV 2	Regular	156.32	3.47	267070	13	6	122	1.41	154083	8533	43397	1.9992	0.5339	Green	7877 2267 7876
20198	Q9BUG6	ZSA5A_HUMAN	Zinc finger and SCAN domain containing protein 5A OS Homo sapiens GN ZSCAN5A PE 2 SV 1	Regular	154.237	3.79	56891.9	16	7	54	8.67	34164	14658	11186	3.4343	0.1954	Yellow
9301	Q15349	KS6A2_HUMAN	Ribosomal protein S6 kinase alpha 2 OS Homo sapiens GN RPS6KA2 PE 1 SV 2	Regular	149.102	3.78	83695.1	16	9	75	6.28	43036	10284	14771	2.4095	0.2017	Green	13864 9302 9300
16439	Q01082	SPTB2_HUMAN	Spectrin beta chain non erythrocytic 1 OS Homo sapiens GN SPTBN1 PE 1 SV 2	Regular	141.347	5.39	275408	69	32	240	7.91	155807	23509	52310	5.508	1.5169	Yellow
14136	Q9H5N1	RABE2_HUMAN	Rab GTPase binding effector protein 2 OS Homo sapiens GN RABEP2 PE 1 SV 2	Regular	139.57	5.69	63999.1	10	5	59	3.34	19311	16624.5	6861	3.895	0.2493	Yellow
10270	P33993	MCM7_HUMAN	DNA replication licensing factor MCM7 OS Homo sapiens GN MCM7 PE 1 SV 4	Regular	138.324	5.67	81935.4	19	10	66	5.84	51122	20181	9127	4.7283	0.3874	Yellow
6142	P22087	FBRL_HUMAN	rRNA 2 O methyltransferase fibrillarin OS Homo sapiens GN FBL PE 1 SV 2	Regular	136.936	5.65	33898.3	7	5	27	15.26	22507	13130	7256	3.0763	0.1043	Yellow
14630	P13489	RINI_HUMAN	Ribonuclease inhibitor OS Homo sapiens GN RNH1 PE 1 SV 2	Regular	136.929	5.63	51798.4	10	4	38	5.42	34276	27733.5	7057	6.4978	0.3366	Yellow
10989	O94832	MYO1D_HUMAN	Unconventional myosin Id OS Homo sapiens GN MYO1D PE 1 SV 2	Regular	136.327	5.92	117001	42	16	89	10.04	105937	36100	38100	8.458	0.9896	Red
4583	Q92499	DDX1_HUMAN	ATP dependent RNA helicase DDX1 OS Homo sapiens GN DDX1 PE 1 SV 2	Regular	134.156	5.9	83401.7	16	8	63	8.78	52450	9004	9292	2.1096	0.1759	Yellow
5625	Q92817	EVPL_HUMAN	Envoplakin OS Homo sapiens GN EVPL PE 1 SV 3	Regular	130.96	6.8	232916	21	16	210	2.46	137016	90291	23445	21.1546	4.9272	Green	35522
1561	Q9P287	BCCIP_HUMAN	BRCA2 and CDKN1A interacting protein OS Homo sapiens GN BCCIP PE 1 SV 1	Regular	130.811	6.77	36321.7	9	4	32	12.42	34023	18117	12959	4.2447	0.1542	Red
9025	O43896	KIF1C_HUMAN	Kinesin like protein KIF1C OS Homo sapiens GN KIF1C PE 1 SV 3	Regular	129.681	6.75	123802	26	11	107	7.43	60818	19146.2	19158	4.4858	0.5554	Yellow	18417 9024 3549
14241	Q8IUD2	RB6I2_HUMAN	ELKS Rab6 interacting CAST family member 1 OS Homo sapiens GN ERC1 PE 1 SV 1	Regular	128.408	6.73	128315	24	14	132	2.24	152184	12111.2	35629	2.8376	0.3641	Green	5520
3788	P51589	CP2J2_HUMAN	Cytochrome P450 2J2 OS Homo sapiens GN CYP2J2 PE 1 SV 2	Regular	128.12	7.01	57895.9	11	5	55	8.96	14556	11622	7678	2.723	0.1576	Yellow
16828	O15061	SYNEM_HUMAN	Synemin OS Homo sapiens GN SYNM PE 1 SV 2	Regular	123.513	8.15	173110	36	17	164	5.11	138807	41544	41191	9.7335	1.685	Green
3983	Q5TZA2	CROCC_HUMAN	Rootletin OS Homo sapiens GN CROCC PE 1 SV 1	Regular	122.401	8.13	228923	47	28	219	6.99	205898	33690	42850	7.8934	1.807	Yellow
7725	Q2TB90	HKDC1_HUMAN	Putative hexokinase HKDC1 OS Homo sapiens GN HKDC1 PE 2 SV 3	Regular	118.239	8.39	103857	24	12	76	7.74	141255	90930	25217	21.3043	2.2126	Yellow
4679	Q9Y6T7	DGKB_HUMAN	Diacylglycerol kinase beta OS Homo sapiens GN DGKB PE 2 SV 2	Regular	114.453	10.57	92192.3	12	8	48	9.08	26907	11386	8774	2.6677	0.2459	Red
16444	Q13813	SPTN1_HUMAN	Spectrin alpha chain non erythrocytic 1 OS Homo sapiens GN SPTAN1 PE 1 SV 3	Regular	114.195	10.54	285338	59	33	272	6.07	163723	37728	50196	8.8394	2.5222	Yellow
9300	Q15418	KS6A1_HUMAN	Ribosomal protein S6 kinase alpha 1 OS Homo sapiens GN RPS6KA1 PE 1 SV 2	Regular	113.177	10.51	83122.3	15	6	70	5.17	29012	0	9516			Yellow	9301 9302
14102	Q8WUD1	RAB2B_HUMAN	Ras related protein Rab 2B OS Homo sapiens GN RAB2B PE 1 SV 1	Regular	110.712	11.01	24442.5	3	2	25	5.56	4032	4371	2448	1.0241	0.025	Red
9618	Q8ND30	LIPB2_HUMAN	Liprin beta 2 OS Homo sapiens GN PPFIBP2 PE 1 SV 3	Regular	110.567	10.98	99114.1	17	7	70	2.63	20198	8577	13726	2.0095	0.1992	Red
3762	Q66GS9	CP135_HUMAN	Centrosomal protein of 135 kDa OS Homo sapiens GN CEP135 PE 1 SV 2	Regular	110.09	11.21	133947	53	21	150	7.54	139057	13528	47735	3.1695	0.4245	Red
10674	Q9HCE1	MOV10_HUMAN	Putative helicase MOV 10 OS Homo sapiens GN MOV10 PE 1 SV 2	Regular	109.903	11.18	114584	21	10	78	5.98	41212	16571	16435	3.8825	0.4449	Yellow
8320	Q9H0C8	ILKAP_HUMAN	Integrin linked kinase associated serine threonine phosphatase 2C OS Homo sapiens GN ILKAP PE 1 SV 1	Regular	109.798	11.14	43476.9	6	4	36	6.12	22920	29332.5	6337	6.8724	0.2988	Red
6148	Q9Y297	FBW1A_HUMAN	F box WD repeat containing protein 1A OS Homo sapiens GN BTRC PE 1 SV 1	Regular	108.227	11.63	70292.6	10	8	52	7.6	65155	19604	8192	4.5931	0.3229	Yellow
5375	Q6ZMW3	EMAL6_HUMAN	Echinoderm microtubule associated protein like 6 OS Homo sapiens GN EML6 PE 2 SV 2	Regular	108.06	11.85	220409	30	17	169	2.5	82358	20074	24755	4.7032	1.0366	Green
19439	Q7Z570	Z804A_HUMAN	Zinc finger protein 804A OS Homo sapiens GN ZNF804A PE 1 SV 3	Regular	107.26	12.07	138713	14	9	94	5.79	77771	44767	13266	10.4886	1.4549	Red
12606	Q13177	PAK2_HUMAN	Serine threonine protein kinase PAK 2 OS Homo sapiens GN PAK2 PE 1 SV 3	Regular	106.327	12.29	58327.9	14	6	43	12.02	78413	13042	12486	3.0557	0.1782	Red
12567	Q9BRP4	PAAF1_HUMAN	Proteasomal ATPase associated factor 1 OS Homo sapiens GN PAAF1 PE 1 SV 2	Regular	106.091	12.5	43159.5	8	3	30	7.65	27604	25126	9648	5.8869	0.2541	Red
5051	Q8TDB6	DTX3L_HUMAN	E3 ubiquitin protein ligase DTX3L OS Homo sapiens GN DTX3L PE 1 SV 1	Regular	105.441	12.46	84638	19	11	60	1.76	37672	11916	13749	2.7918	0.2363	Red
5883	Q16877	F264_HUMAN	6 phosphofructo 2 kinase fructose 2 6 bisphosphatase 4 OS Homo sapiens GN PFKFB4 PE 2 SV 6	Regular	104.878	12.43	54724.2	8	4	44	4.9	13935	3448.5	6600	0.808	0.0442	Red
17499	Q04726	TLE3_HUMAN	Transducin like enhancer protein 3 OS Homo sapiens GN TLE3 PE 1 SV 2	Regular	101.77	12.39	84215.2	12	8	51	7.12	81149	57719	10699	13.5232	1.1389	Red
3771	Q9BV73	CP250_HUMAN	Centrosome associated protein CEP250 OS Homo sapiens GN CEP250 PE 1 SV 2	Regular	101.763	12.36	282050	57	29	280	5.45	227867	167111	109760	39.153	11.0431	Yellow
277	P19801	ABP1_HUMAN	Amiloride sensitive amine oxidase copper containing OS Homo sapiens GN ABP1 PE 1 SV 4	Regular	101.531	12.57	85776.9	8	3	48	2.4	23508	30685.5	6807	7.1894	0.6167	Yellow
6380	Q96PY5	FMNL2_HUMAN	Formin like protein 2 OS Homo sapiens GN FMNL2 PE 1 SV 3	Regular	100.864	12.78	123777	21	13	86	4.51	76272	24434	20270	5.7247	0.7086	Yellow
10374	Q9H1K6	MESD1_HUMAN	Mesoderm development candidate 1 OS Homo sapiens GN MESDC1 PE 1 SV 1	Regular	99.7978	13.22	38556.7	6	3	24	4.7	18012	35673	10888	8.358	0.3223	Red
7310	P42262	GRIA2_HUMAN	Glutamate receptor 2 OS Homo sapiens GN GRIA2 PE 1 SV 3	Regular	99.4991	13.19	99448.6	23	10	64	8.61	69430	40761.8	28431	9.5502	0.9498	Red	7312
5520	O15083	ERC2_HUMAN	ERC protein 2 OS Homo sapiens GN ERC2 PE 1 SV 3	Regular	99.4845	13.15	110729	18	12	119	6.27	82663	27337	36295	6.4049	0.7092	Yellow	14241
16480	Q9C0H9	SRCN1_HUMAN	SRC kinase signaling inhibitor 1 OS Homo sapiens GN SRCIN1 PE 1 SV 3	Regular	98.417	13.82	112739	24	12	96	4.74	47981	19767	22689	4.6313	0.5221	Red
8126	O60841	IF2P_HUMAN	Eukaryotic translation initiation factor 5B OS Homo sapiens GN EIF5B PE 1 SV 4	Regular	97.4251	13.78	139283	11	7	103	4.92	65610	11763	10145	2.756	0.3839	Yellow
20085	Q5JPB2	ZN831_HUMAN	Zinc finger protein 831 OS Homo sapiens GN ZNF831 PE 2 SV 4	Regular	97.2167	13.75	179888	21	9	118	2.62	34825	7481	17691	1.7528	0.3153	Yellow
18855	Q9P253	VPS18_HUMAN	Vacuolar protein sorting associated protein 18 homolog OS Homo sapiens GN VPS18 PE 1 SV 2	Regular	96.1826	13.94	111554	15	7	80	3.8	53907	8512	9562	1.9943	0.2225	Yellow	18175
3370	P53675	CLH2_HUMAN	Clathrin heavy chain 2 OS Homo sapiens GN CLTCL1 PE 1 SV 2	Regular	95.859	14.13	189140	32	15	133	5.98	99624	6466.28	22595	1.515	0.2865	Green	3369
751	Q9BXX2	AN30B_HUMAN	Ankyrin repeat domain containing protein 30B OS Homo sapiens GN ANKRD30B PE 2 SV 3	Regular	95.1855	14.1	159589	28	14	137	5.32	94098	31349	30515	7.3449	1.1722	Yellow	750
11148	Q96M43	NBPF4_HUMAN	Neuroblastoma breakpoint family member 4 OS Homo sapiens GN NBPF4 PE 2 SV 2	Regular	94.442	14.29	72793.9	11	6	49	1.25	15860	12888	8856	3.0196	0.2198	Red
16057	Q9NTJ3	SMC4_HUMAN	Structural maintenance of chromosomes protein 4 OS Homo sapiens GN SMC4 PE 1 SV 2	Regular	93.7388	14.47	147867	33	16	137	7.61	76563	20560	19867	4.8171	0.7123	Yellow
18417	Q9BZF9	UACA_HUMAN	Uveal autoantigen with coiled coil domains and ankyrin repeats OS Homo sapiens GN UACA PE 1 SV 2	Regular	91.6371	14.88	163646	23	17	161	2.82	70257	10414	20345	2.4399	0.3993	Red	9025 3549
4175	P26232	CTNA2_HUMAN	Catenin alpha 2 OS Homo sapiens GN CTNNA2 PE 1 SV 5	Regular	91.4953	14.84	106112	23	12	77	8.71	46005	10851	20792	2.5423	0.2698	Red
13990	Q96PZ0	PUS7_HUMAN	Pseudouridylate synthase 7 homolog OS Homo sapiens GN PUS7 PE 1 SV 2	Regular	91.42	14.81	75377.8	12	6	61	5.9	26623	16950	15658	3.9713	0.2993	Red
7312	P48058	GRIA4_HUMAN	Glutamate receptor 4 OS Homo sapiens GN GRIA4 PE 2 SV 2	Regular	90.9267	14.77	101613	13	6	62	3.22	60699	15007.7	22614	3.5162	0.3573	Yellow	7310
10920	P53602	MVD1_HUMAN	Diphosphomevalonate decarboxylase OS Homo sapiens GN MVD PE 1 SV 1	Regular	90.2588	14.95	43917.9	4	2	35	3.25	8206	6699	1846	1.5695	0.0689	Red
6538	Q96AE4	FUBP1_HUMAN	Far upstream element binding protein 1 OS Homo sapiens GN FUBP1 PE 1 SV 3	Regular	90.0997	14.91	67731.6	14	7	45	6.21	44492	17387.2	9685	4.0737	0.2759	Yellow	6539
8011	P52789	HXK2_HUMAN	Hexokinase 2 OS Homo sapiens GN HK2 PE 1 SV 2	Regular	89.4749	15.09	103806	17	8	71	7.63	25753	16168	8466	3.7881	0.3932	Red
5490	P54762	EPHB1_HUMAN	Ephrin type B receptor 1 OS Homo sapiens GN EPHB1 PE 1 SV 1	Regular	89.3935	15.27	111368	12	9	79	7.32	48178	13752.5	14159	3.2221	0.3588	Red	5492
6797	Q92616	GCN1L_HUMAN	Translational activator GCN1 OS Homo sapiens GN GCN1L1 PE 1 SV 6	Regular	89.2978	15.23	295154	39	20	225	6.21	48342	15175	27268	3.5554	1.0494	Yellow
6476	A0AVI2	FR1L5_HUMAN	Fer 1 like protein 5 OS Homo sapiens GN FER1L5 PE 2 SV 2	Regular	88.8985	15.4	244130	21	14	175	3.3	43891	18591	18272	4.3558	1.0634	Yellow
8621	Q96N16	JKIP1_HUMAN	Janus kinase and microtubule interacting protein 1 OS Homo sapiens GN JAKMIP1 PE 1 SV 1	Regular	88.4699	15.58	73551.4	15	7	64	3.99	203012	225264	38128	52.7779	3.8819	Yellow
8584	Q14573	ITPR3_HUMAN	Inositol 1 4 5 trisphosphate receptor type 3 OS Homo sapiens GN ITPR3 PE 1 SV 2	Regular	88.354	15.54	307016	30	15	202	3.14	100663	59183	17940	13.8662	4.2571	Yellow	38509 33929 8582 8583
1922	Q86UF4	CA110_HUMAN	Coiled coil domain containing protein C1orf110 OS Homo sapiens GN C1orf110 PE 2 SV 2	Regular	88.338	15.5	34502.1	10	5	28	4.3	15161	4272	4999	1.0009	0.0345	Red
18372	P19971	TYPH_HUMAN	Thymidine phosphorylase OS Homo sapiens GN TYMP PE 1 SV 2	Regular	87.6539	15.46	50354.8	12	5	33	8.3	11540	5956	5283	1.3955	0.0703	Red
4025	Q86XI8	CS068_HUMAN	Uncharacterized protein C19orf68 OS Homo sapiens GN C19orf68 PE 1 SV 2	Regular	86.648	16.05	71042.5	10	5	51	4.47	47867	27363	10683	6.411	0.4555	Red	15675 11326
8980	Q07666	KHDR1_HUMAN	KH domain containing RNA binding signal transduction associated protein 1 OS Homo sapiens GN KHDRB	Regular	85.7366	16.22	48341.5	10	3	21	5.19	23851	21499.5	5044	5.0372	0.2435	Red
18549	Q5T4S7	UBR4_HUMAN	E3 ubiquitin protein ligase UBR4 OS Homo sapiens GN UBR4 PE 1 SV 1	Regular	85.0765	16.79	580913	53	26	368	1.39	105073	32909	34007	7.7104	4.4791	Yellow	25459
5310	Q14152	EIF3A_HUMAN	Eukaryotic translation initiation factor 3 subunit A OS Homo sapiens GN EIF3A PE 1 SV 1	Regular	84.9568	16.75	166969	25	13	250	3.84	176650	47389	41820	11.1029	1.8538	Red
19822	P59923	ZN445_HUMAN	Zinc finger protein 445 OS Homo sapiens GN ZNF445 PE 2 SV 1	Regular	84.7747	16.91	121358	17	8	88	6.4	43747	27656	10307	6.4796	0.7864	Red
618	Q99996	AKAP9_HUMAN	A kinase anchor protein 9 OS Homo sapiens GN AKAP9 PE 1 SV 3	Regular	84.6187	16.87	456006	72	39	411	4.78	152798	29842	55045	6.9918	3.1883	Red	21745 12812
12760	Q9Y5E9	PCDBE_HUMAN	Protocadherin beta 14 OS Homo sapiens GN PCDHB14 PE 2 SV 1	Regular	84.4459	16.83	88061.2	16	8	57	3.38	67762	7206	20802	1.6883	0.1487	Red	12749 12758 12748
16447	Q9NRC6	SPTN5_HUMAN	Spectrin beta chain non erythrocytic 5 OS Homo sapiens GN SPTBN5 PE 1 SV 1	Regular	84.1852	16.79	419516	48	28	327	3.1	205820	27668	34171	6.4824	2.7195	Yellow
7016	A6NH11	GLTD2_HUMAN	Glycolipid transfer protein domain containing protein 2 OS Homo sapiens GN GLTPD2 PE 1 SV 2	Regular	84.0185	16.75	31983.8	9	5	24	7.9	10467	2995.5	3636	0.7018	0.0224	Red
16785	P49589	SYCC_HUMAN	Cysteine tRNA ligase cytoplasmic OS Homo sapiens GN CARS PE 1 SV 3	Regular	83.8813	16.71	86157.8	20	7	63	4.41	25832	9759	8971	2.2865	0.197	Red
9503	Q6UWM7	LCTL_HUMAN	Lactase like protein OS Homo sapiens GN LCTL PE 1 SV 2	Regular	83.542	16.67	65601.7	11	8	45	9.88	50684	10201	6100	2.39	0.1568	Red
4369	Q7L576	CYFP1_HUMAN	Cytoplasmic FMR1 interacting protein 1 OS Homo sapiens GN CYFIP1 PE 1 SV 1	Regular	83.1261	16.82	146837	19	9	95	5.91	63963	20721.3	14170	4.8549	0.7129	Red	4370
13819	P55786	PSA_HUMAN	Puromycin sensitive aminopeptidase OS Homo sapiens GN NPEPPS PE 1 SV 2	Regular	82.4858	17.18	103961	16	8	68	6.64	52453	22966	14367	5.3808	0.5594	Red
5125	Q8NCM8	DYHC2_HUMAN	Cytoplasmic dynein 2 heavy chain 1 OS Homo sapiens GN DYNC2H1 PE 1 SV 4	Regular	82.1598	17.33	496101	63	31	346	2.95	148472	15749	44810	3.6899	1.8306	Red
15123	Q9NQC3	RTN4_HUMAN	Reticulon 4 OS Homo sapiens GN RTN4 PE 1 SV 2	Regular	81.6626	17.48	130331	20	7	90	3.44	39236	17573	9214	4.1172	0.5366	Red
17254	Q9BXF9	TEKT3_HUMAN	Tektin 3 OS Homo sapiens GN TEKT3 PE 1 SV 1	Regular	81.6414	17.44	57149.3	4	4	38	1.84	25743	10647	5408	2.4945	0.1426	Yellow
17379	Q8TBB0	THAP6_HUMAN	THAP domain containing protein 6 OS Homo sapiens GN THAP6 PE 2 SV 1	Regular	81.2017	17.59	26318	5	2	18	6.31	5634	11865	3147	2.7799	0.0732	Red
15944	Q9NXA8	SIR5_HUMAN	NAD dependent protein deacylase sirtuin 5 mitochondrial OS Homo sapiens GN SIRT5 PE 1 SV 2	Regular	81.0632	17.55	34565.3	6	3	26	11.29	6553	6553	2165	1.5353	0.0531	Red
16341	Q8NA61	SPERT_HUMAN	Spermatid associated protein OS Homo sapiens GN SPERT PE 2 SV 1	Regular	81.0547	17.51	51969.7	21	10	44	12.05	65104	16007	14734	3.7503	0.1949	Red
18539	Q93009	UBP7_HUMAN	Ubiquitin carboxyl terminal hydrolase 7 OS Homo sapiens GN USP7 PE 1 SV 2	Regular	81.0385	17.47	129386	16	8	98	9.35	20845	11166	8728	2.6161	0.3385	Red
14479	Q9H0H5	RGAP1_HUMAN	Rac GTPase activating protein 1 OS Homo sapiens GN RACGAP1 PE 1 SV 1	Regular	81.0318	17.43	71711	7	4	51	3.64	43225	49248	6731	11.5385	0.8274	Red
2957	Q0VF96	CGNL1_HUMAN	Cingulin like protein 1 OS Homo sapiens GN CGNL1 PE 1 SV 2	Regular	79.7675	17.95	149650	21	14	135	4.84	76892	23565	24592	5.5211	0.8262	Yellow
11729	Q08J23	NSUN2_HUMAN	tRNA cytosine 34 C 5 methyltransferase OS Homo sapiens GN NSUN2 PE 1 SV 2	Regular	79.66	17.91	87269.3	14	6	70	7.82	26739	12056	13182	2.8246	0.2465	Red
8459	P46940	IQGA1_HUMAN	Ras GTPase activating like protein IQGAP1 OS Homo sapiens GN IQGAP1 PE 1 SV 1	Regular	79.5079	17.87	189880	20	10	116	5.49	69733	41924	12115	9.8225	1.8651	Red
2763	Q8N8E3	CE112_HUMAN	Centrosomal protein of 112 kDa OS Homo sapiens GN CEP112 PE 1 SV 2	Regular	79.1989	18.02	113262	21	13	104	4.08	49467	11120	19796	2.6053	0.2951	Red
9775	Q9Y546	LRC42_HUMAN	Leucine rich repeat containing protein 42 OS Homo sapiens GN LRRC42 PE 1 SV 1	Regular	79.1706	17.98	49312.8	9	5	39	6.31	37309	18880.5	9426	4.4236	0.2181	Red
16434	O00267	SPT5H_HUMAN	Transcription elongation factor SPT5 OS Homo sapiens GN SUPT5H PE 1 SV 1	Regular	78.894	18.12	121399	20	8	87	1.66	22973	3045	9980	0.7134	0.0866	Red
16023	Q8IYM2	SLN12_HUMAN	Schlafen family member 12 OS Homo sapiens GN SLFN12 PE 1 SV 2	Regular	78.4421	18.26	67942.1	8	5	55	8.65	14575	11852	5913	2.7768	0.1887	Red
13232	Q8IWE5	PKHM2_HUMAN	Pleckstrin homology domain containing family M member 2 OS Homo sapiens GN PLEKHM2 PE 1 SV 2	Regular	78.1435	18.22	114491	15	6	66	4.12	19727	8217	11923	1.9252	0.2204	Yellow
7109	Q14789	GOGB1_HUMAN	Golgin subfamily B member 1 OS Homo sapiens GN GOLGB1 PE 1 SV 2	Regular	78.1247	18.18	377445	56	33	362	4.08	260688	25636	74548	6.0064	2.2671	Yellow	5794
10008	Q6P0N0	M18BP_HUMAN	Mis18 binding protein 1 OS Homo sapiens GN MIS18BP1 PE 1 SV 1	Regular	75.4613	19.39	129998	11	10	104	4.68	28998	12743	10863	2.9856	0.3881	Red
19297	Q96TA2	YMEL1_HUMAN	ATP dependent zinc metalloprotease YME1L1 OS Homo sapiens GN YME1L1 PE 1 SV 2	Regular	75.4035	19.7	86740.6	18	7	62	3.62	20843	8737	7817	2.047	0.1776	Red
10157	Q16644	MAPK3_HUMAN	MAP kinase activated protein kinase 3 OS Homo sapiens GN MAPKAPK3 PE 1 SV 1	Regular	75.3632	19.65	43500.3	8	4	44	2.09	9651	5466	4451	1.2806	0.0557	Red
720	Q9Y2J4	AMOL2_HUMAN	Angiomotin like protein 2 OS Homo sapiens GN AMOTL2 PE 1 SV 3	Regular	75.3041	19.61	85992.6	11	8	57	2.44	34547	15921	9399	3.7302	0.3208	Red	719
19653	Q9UII5	ZN107_HUMAN	Zinc finger protein 107 OS Homo sapiens GN ZNF107 PE 2 SV 1	Regular	75.2089	19.74	93524	16	12	57	4.6	56396	5780	9849	1.3542	0.1267	Red
3767	Q16678	CP1B1_HUMAN	Cytochrome P450 1B1 OS Homo sapiens GN CYP1B1 PE 1 SV 2	Regular	75.1879	19.7	61302.2	12	6	46	1.47	19899	14190	4357	3.3246	0.2038	Red
18175	Q9UJT2	TSKS_HUMAN	Testis specific serine kinase substrate OS Homo sapiens GN TSKS PE 1 SV 3	Regular	75.1524	19.66	65791.6	9	4	47	2.7	35002	2832	11697	0.6635	0.0437	Yellow	18855
10958	Q9Y2K3	MYH15_HUMAN	Myosin 15 OS Homo sapiens GN MYH15 PE 1 SV 5	Regular	75.1079	19.62	226045	36	19	170	3.03	122054	33716	24535	7.8994	1.7856	Red
11205	O60502	NCOAT_HUMAN	Bifunctional protein NCOAT OS Homo sapiens GN MGEA5 PE 1 SV 2	Regular	75.0742	19.57	103999	13	7	77	2.18	69933	67420.5	10776	15.7962	1.6428	Yellow
6850	P06396	GELS_HUMAN	Gelsolin OS Homo sapiens GN GSN PE 1 SV 1	Regular	74.4386	20.04	86096.8	12	7	51	3.45	56192	58677	18084	13.7476	1.1836	Red
17108	Q0IIM8	TBC8B_HUMAN	TBC1 domain family member 8B OS Homo sapiens GN TBC1D8B PE 2 SV 2	Regular	74.2085	20.17	130192	16	6	92	2.86	11551	2803.5	8237	0.6568	0.0855	Red
3549	Q7Z7A1	CNTRL_HUMAN	Centriolin OS Homo sapiens GN CNTRL PE 1 SV 2	Regular	72.7123	20.63	270027	36	18	220	2.92	229624	17518	58354	4.1044	1.1083	Yellow	9025 18417
17016	Q92750	TAF4B_HUMAN	Transcription initiation factor TFIID subunit 4B OS Homo sapiens GN TAF4B PE 1 SV 2	Regular	72.1932	20.91	91889	8	4	66	3.6	32682	13441	6065	3.1491	0.2894	Red	16625
16018	Q9H2G2	SLK_HUMAN	STE20 like serine threonine protein kinase OS Homo sapiens GN SLK PE 1 SV 1	Regular	72.4645	20.87	143322	16	11	123	6.88	86612	19819.8	12415	4.6436	0.6655	Red	37348 31792 8335 1067 8602 20219
18801	Q76NI1	VKIND_HUMAN	Protein very KIND OS Homo sapiens GN KNDC1 PE 2 SV 2	Regular	72.1488	20.82	193621	21	11	116	1.6	95277	54365	20125	12.7374	2.4662	Yellow
12673	P09874	PARP1_HUMAN	Poly ADP ribose polymerase 1 OS Homo sapiens GN PARP1 PE 1 SV 4	Regular	71.8596	20.94	113882	16	7	83	1.97	32798	14326.5	19133	3.3566	0.3823	Yellow
12569	P11940	PABP1_HUMAN	Polyadenylate binding protein 1 OS Homo sapiens GN PABPC1 PE 1 SV 2	Regular	71.0899	21.22	70899.1	16	8	45	2.99	46746	9027	11597	2.115	0.1499	Red	12572
6606	Q9UM11	FZR_HUMAN	Fizzy related protein homolog OS Homo sapiens GN FZR1 PE 1 SV 2	Regular	70.8492	21.18	55578.6	7	3	42	2.02	5774	7626	1939	1.7867	0.0993	Red
10966	P13535	MYH8_HUMAN	Myosin 8 OS Homo sapiens GN MYH8 PE 1 SV 3	Regular	70.5861	21.62	223732	32	22	158	3.77	323126	25246	29196	5.915	1.3234	Red	10962 10961 10956 10964 10960 10959 10965
882	P08133	ANXA6_HUMAN	Annexin A6 OS Homo sapiens GN ANXA6 PE 1 SV 3	Regular	70.3374	21.73	76215.6	13	6	69	1.63	50513	10323	8846	2.4186	0.1843	Red
11043	Q86UW6	N4BP2_HUMAN	NEDD4 binding protein 2 OS Homo sapiens GN N4BP2 PE 1 SV 2	Regular	69.7442	21.84	200569	17	10	130	4.75	148926	102637	15050	24.0472	4.8231	Red
870	P01008	ANT3_HUMAN	Antithrombin III OS Homo sapiens GN SERPINC1 PE 1 SV 1	Regular	69.7185	21.8	53058.8	15	8	37	5.39	47523	13941	11676	3.2663	0.1733	Red
19685	O15231	ZN185_HUMAN	Zinc finger protein 185 OS Homo sapiens GN ZNF185 PE 1 SV 3	Regular	69.4198	21.91	74438	4	3	73	3.63	17077	21304.5	5948	4.9915	0.3716	Red
6546	P07954	FUMH_HUMAN	Fumarate hydratase mitochondrial OS Homo sapiens GN FH PE 1 SV 3	Regular	69.3709	21.87	54808.2	15	8	31	6.86	70315	8034	7900	1.8823	0.1032	Red
1142	P59998	ARPC4_HUMAN	Actin related protein 2 3 complex subunit 4 OS Homo sapiens GN ARPC4 PE 1 SV 3	Regular	69.347	21.83	19781.1	4	3	15	11.31	15834	16981.5	2169	3.9787	0.0787	Red
10690	Q2M385	MPEG1_HUMAN	Macrophage expressed gene 1 protein OS Homo sapiens GN MPEG1 PE 2 SV 1	Regular	69.2718	21.78	79613.7	15	6	50	4.33	65039	50493	12859	11.8302	0.9418	Red
2468	Q9Y698	CCG2_HUMAN	Voltage dependent calcium channel gamma 2 subunit OS Homo sapiens GN CACNG2 PE 1 SV 1	Regular	69.2641	21.74	36308.1	7	3	25	5.26	9459	9459	4122	2.2162	0.0805	Red
7686	C9JL84	HHLA1_HUMAN	HERV H LTR associating protein 1 OS Homo sapiens GN HHLA1 PE 2 SV 1	Regular	69.1466	21.7	59152.1	8	5	31	5.27	24596	12897	7224	3.0217	0.1787	Red
10509	Q8IXI2	MIRO1_HUMAN	Mitochondrial Rho GTPase 1 OS Homo sapiens GN RHOT1 PE 1 SV 2	Regular	69.002	21.81	71810.8	8	4	42	4.69	12433	8014.5	4334	1.8777	0.1348	Red
1052	Q9NR81	ARHG3_HUMAN	Rho guanine nucleotide exchange factor 3 OS Homo sapiens GN ARHGEF3 PE 2 SV 1	Regular	68.9344	21.76	60581.1	5	3	46	3.23	11601	15211.5	3157	3.564	0.2159	Red
3403	Q9H078	CLPB_HUMAN	Caseinolytic peptidase B protein homolog OS Homo sapiens GN CLPB PE 1 SV 1	Regular	68.8957	21.72	79242.2	9	7	59	2.69	34630	12570	10090	2.9451	0.2334	Red
5211	Q6P2E9	EDC4_HUMAN	Enhancer of mRNA decapping protein 4 OS Homo sapiens GN EDC4 PE 1 SV 1	Regular	68.7591	21.68	153087	12	10	84	3.71	55424	24319	12231	5.6978	0.8723	Red
11712	Q9BZ95	NSD3_HUMAN	Histone lysine N methyltransferase NSD3 OS Homo sapiens GN WHSC1L1 PE 1 SV 1	Regular	68.7246	21.64	165434	17	7	107	3.06	60483	34529	13833	8.0899	1.3383	Red
10960	Q9UKX2	MYH2_HUMAN	Myosin 2 OS Homo sapiens GN MYH2 PE 1 SV 1	Regular	68.0645	22.05	224071	28	20	162	2.32	286785	6927	19409	1.623	0.3637	Red	10962 10961 10966 10956 10964 10959 10965
18947	Q96S15	WDR24_HUMAN	WD repeat containing protein 24 OS Homo sapiens GN WDR24 PE 1 SV 1	Regular	67.9275	22.01	103986	13	5	76	3.59	18839	8083.5	5928	1.8939	0.1969	Red
16998	P40200	TACT_HUMAN	T cell surface protein tactile OS Homo sapiens GN CD96 PE 1 SV 2	Regular	67.5668	22.41	66432	10	5	36	2.39	34970	11493	7963	2.6927	0.1789	Red
7010	Q86SR1	GLT10_HUMAN	Polypeptide N acetylgalactosaminyltransferase 10 OS Homo sapiens GN GALNT10 PE 1 SV 2	Regular	67.202	22.81	69733.3	11	5	46	11.61	11799	8063	8672	1.8891	0.1317	Red
4192	O14578	CTRO_HUMAN	Citron Rho interacting kinase OS Homo sapiens GN CIT PE 1 SV 2	Regular	66.7157	23.21	233484	37	19	184	2.96	211545	31534	43765	7.3882	1.725	Yellow
8949	Q9ULH0	KDIS_HUMAN	Kinase D interacting substrate of 220 kDa OS Homo sapiens GN KIDINS220 PE 1 SV 3	Regular	66.5033	23.16	198139	26	17	145	5.42	48146	9940	20416	2.3289	0.4614	Red
12655	Q460N5	PAR14_HUMAN	Poly ADP ribose polymerase 14 OS Homo sapiens GN PARP14 PE 1 SV 3	Regular	66.4608	23.12	204853	39	22	168	6.16	86831	21751	21927	5.0961	1.044	Red
6146	Q5XX13	FBW10_HUMAN	F box WD repeat containing protein 10 OS Homo sapiens GN FBXW10 PE 2 SV 2	Regular	66.2641	23.36	121271	15	10	92	3.9	28827	9445	10576	2.2129	0.2684	Red
3669	P35606	COPB2_HUMAN	Coatomer subunit beta OS Homo sapiens GN COPB2 PE 1 SV 2	Regular	66.16	23.46	103343	12	6	70	3.09	20796	5167.5	6354	1.2107	0.1251	Red
4802	Q8TDM6	DLG5_HUMAN	Disks large homolog 5 OS Homo sapiens GN DLG5 PE 1 SV 4	Regular	66.0949	23.42	215579	30	15	196	2.55	78943	23472	25634	5.4993	1.1855	Red
273	P42684	ABL2_HUMAN	Abelson tyrosine protein kinase 2 OS Homo sapiens GN ABL2 PE 1 SV 1	Regular	65.862	23.66	129370	13	8	89	3.81	152118	11477	16480	2.689	0.3479	Red
16284	Q96R06	SPAG5_HUMAN	Sperm associated antigen 5 OS Homo sapiens GN SPAG5 PE 1 SV 2	Regular	65.6998	23.76	135791	20	10	102	6.45	49060	13497	19838	3.1623	0.4294	Red
213	O95477	ABCA1_HUMAN	ATP binding cassette sub family A member 1 OS Homo sapiens GN ABCA1 PE 1 SV 3	Regular	65.653	23.85	256527	39	20	158	5.4	100195	15106	24452	3.5392	0.9079	Red
12641	Q9BWT3	PAPOG_HUMAN	Poly A polymerase gamma OS Homo sapiens GN PAPOLG PE 1 SV 2	Regular	65.5326	23.95	83144.9	14	8	59	3.67	35710	7378.5	10061	1.7287	0.1437	Red
4644	A2RUS2	DEND3_HUMAN	DENN domain containing protein 3 OS Homo sapiens GN DENND3 PE 2 SV 2	Regular	65.5205	23.91	137829	23	11	99	3.26	77168	11784	19652	2.7609	0.3805	Red
6804	Q9BSJ2	GCP2_HUMAN	Gamma tubulin complex component 2 OS Homo sapiens GN TUBGCP2 PE 1 SV 2	Regular	65.5201	23.86	103162	12	9	70	0.89	42513	6510	16233	1.5253	0.1573	Red
12749	Q9Y5E6	PCDB3_HUMAN	Protocadherin beta 3 OS Homo sapiens GN PCDHB3 PE 2 SV 1	Regular	65.4385	23.82	87172.1	8	5	45	2.51	17344	8250	7821	1.9329	0.1685	Red	12760 12758 12748
12758	Q9Y5F1	PCDBC_HUMAN	Protocadherin beta 12 OS Homo sapiens GN PCDHB12 PE 2 SV 1	Regular	65.0701	24.05	87226.2	9	5	57	1.64	35017	2607	4501	0.6108	0.0533	Red	12749 12760 12748
4729	O43143	DHX15_HUMAN	Putative pre mRNA splicing factor ATP dependent RNA helicase DHX15 OS Homo sapiens GN DHX15 PE 1 SV	Regular	64.9958	24.01	91731.4	10	6	84	1.13	33741	23346	9333	5.4698	0.5018	Red
13948	P10586	PTPRF_HUMAN	Receptor type tyrosine protein phosphatase F OS Homo sapiens GN PTPRF PE 1 SV 2	Regular	64.7247	24.37	214077	32	18	132	4.4	100734	37178	22603	8.7106	1.8647	Red	13946 13958
1272	Q01814	AT2B2_HUMAN	Plasma membrane calcium transporting ATPase 2 OS Homo sapiens GN ATP2B2 PE 1 SV 2	Regular	64.713	24.33	138074	23	12	89	2.57	64812	8255	13574	1.9341	0.267	Red	1273
18489	Q6ZU65	UBN2_HUMAN	Ubinuclein 2 OS Homo sapiens GN UBN2 PE 1 SV 2	Regular	64.6017	24.29	146716	9	5	103	2.15	30565	15742	5802	3.6882	0.5411	Red
10366	Q16819	MEP1A_HUMAN	Meprin A subunit alpha OS Homo sapiens GN MEP1A PE 1 SV 2	Regular	64.4739	24.24	85502.6	6	3	49	6.3	15465	5925	3029	1.3882	0.1187	Red
5286	Q8N3D4	EH1L1_HUMAN	EH domain binding protein 1 like protein 1 OS Homo sapiens GN EHBP1L1 PE 1 SV 2	Regular	64.1058	24.6	162653	21	11	113	4.01	35311	14866	11094	3.483	0.5665	Red
18631	Q70J99	UN13D_HUMAN	Protein unc 13 homolog D OS Homo sapiens GN UNC13D PE 1 SV 1	Regular	64.0003	24.69	124366	11	7	80	4.31	41849	13079	13575	3.0643	0.3811	Red
5705	Q9NZB2	F120A_HUMAN	Constitutive coactivator of PPAR gamma like protein 1 OS Homo sapiens GN FAM120A PE 1 SV 2	Regular	63.9315	24.78	123085	9	5	70	5.72	26415	18429	6652	4.3178	0.5315	Yellow	11559
5618	Q03112	EVI1_HUMAN	MDS1 and EVI1 complex locus protein EVI1 OS Homo sapiens GN MECOM PE 1 SV 2	Regular	63.218	25.52	119759	12	6	74	1.62	50100	60324	9530	14.1335	1.6926	Yellow
20219	Q9P217	ZSWM5_HUMAN	Zinc finger SWIM domain containing protein 5 OS Homo sapiens GN ZSWIM5 PE 2 SV 2	Regular	63.0482	25.48	132402	15	6	77	0.51	28710	53403	16390	12.512	1.6566	Yellow	16018
16100	P53814	SMTN_HUMAN	Smoothelin OS Homo sapiens GN SMTN PE 1 SV 7	Regular	62.8466	25.69	99572.1	15	9	84	4.91	46082	6405	9807	1.5007	0.1494	Red	20761
17281	A2RU30	TESP1_HUMAN	Protein TESPA1 OS Homo sapiens GN TESPA1 PE 1 SV 2	Regular	62.7693	25.65	60068.8	4	3	40	3.84	4996	3871.5	2790	0.9071	0.0545	Red
8801	Q8WYB5	KAT6B_HUMAN	Histone acetyltransferase KAT6B OS Homo sapiens GN KAT6B PE 1 SV 3	Regular	62.0058	26.36	234287	28	15	139	4.2	116251	56711	53302	13.287	3.113	Red	8800
11498	Q14957	NMDE3_HUMAN	Glutamate NMDA receptor subunit epsilon 3 OS Homo sapiens GN GRIN2C PE 2 SV 3	Regular	61.7968	26.32	135692	20	10	78	3.81	36580	10364	14407	2.4282	0.3295	Red
12572	Q13310	PABP4_HUMAN	Polyadenylate binding protein 4 OS Homo sapiens GN PABPC4 PE 1 SV 1	Regular	61.7203	26.4	71125.2	11	5	47	1.55	35153	0	8216			Red	12569
4506	Q8WV16	DCAF4_HUMAN	DDB1 and CUL4 associated factor 4 OS Homo sapiens GN DCAF4 PE 1 SV 3	Regular	61.5508	26.48	56492	4	3	32	2.63	20708	21286.5	6751	4.9873	0.2817	Red
4769	Q155Q3	DIXC1_HUMAN	Dixin OS Homo sapiens GN DIXDC1 PE 1 SV 2	Regular	61.3448	26.43	77934.4	9	6	69	2.49	42917	13093.5	7033	3.0677	0.2391	Red
4370	Q96F07	CYFP2_HUMAN	Cytoplasmic FMR1 interacting protein 2 OS Homo sapiens GN CYFIP2 PE 1 SV 2	Regular	61.3401	26.39	150395	18	11	99	4.15	81859	6877.66	12420	1.6114	0.2423	Red	4369
13365	Q8TBY8	PMFBP_HUMAN	Polyamine modulated factor 1 binding protein 1 OS Homo sapiens GN PMFBP1 PE 2 SV 1	Regular	61.1721	26.71	120573	13	9	129	3.13	24778	8011	6828	1.8769	0.2263	Red
15001	Q9NYV6	RRN3_HUMAN	RNA polymerase I specific transcription initiation factor RRN3 OS Homo sapiens GN RRN3 PE 1 SV 1	Regular	60.8338	26.91	74905.8	7	6	55	4.15	24031	4828.5	8810	1.1313	0.0847	Red
8430	Q96P70	IPO9_HUMAN	Importin 9 OS Homo sapiens GN IPO9 PE 1 SV 3	Regular	60.8204	26.87	116933	13	6	61	4.32	86686	7932	15393	1.8584	0.2173	Red
12061	Q01968	OCRL_HUMAN	Inositol polyphosphate 5 phosphatase OCRL 1 OS Homo sapiens GN OCRL PE 1 SV 3	Regular	60.7788	26.82	105459	11	6	74	3.22	24867	5743.5	5958	1.3457	0.1419	Red
2810	Q9NYQ6	CELR1_HUMAN	Cadherin EGF LAG seven pass G type receptor 1 OS Homo sapiens GN CELSR1 PE 1 SV 1	Regular	60.6288	26.9	334562	44	25	200	2.95	197746	17681	56831	4.1425	1.3859	Red	2811
17873	Q02880	TOP2B_HUMAN	DNA topoisomerase 2 beta OS Homo sapiens GN TOP2B PE 1 SV 3	Regular	60.4715	26.85	184237	17	13	139	2.34	35978	11566	15258	2.7098	0.4993	Yellow	17872
17817	Q9H2K2	TNKS2_HUMAN	Tankyrase 2 OS Homo sapiens GN TNKS2 PE 1 SV 1	Regular	60.0774	27.17	128572	21	10	104	6.26	59009	19873	20517	4.6561	0.5986	Red	17816
13315	Q9H4B4	PLK3_HUMAN	Serine threonine protein kinase PLK3 OS Homo sapiens GN PLK3 PE 1 SV 2	Regular	59.8643	27.6	72256.7	14	7	46	6.04	34775	11445	6358	2.6815	0.1938	Red
3777	P11509	CP2A6_HUMAN	Cytochrome P450 2A6 OS Homo sapiens GN CYP2A6 PE 1 SV 3	Regular	59.8412	27.55	56672.6	7	3	46	5.67	12255	9954	4274	2.3322	0.1322	Red
1576	Q86UU0	BCL9L_HUMAN	B cell CLL lymphoma 9 like protein OS Homo sapiens GN BCL9L PE 1 SV 1	Regular	59.654	27.74	157529	7	5	64	3.07	12581	8035	4523	1.8825	0.2966	Red
14151	Q92878	RAD50_HUMAN	DNA repair protein RAD50 OS Homo sapiens GN RAD50 PE 1 SV 1	Regular	59.1881	28.16	154919	27	17	138	4.88	68728	12431	21368	2.9125	0.4512	Red
10149	P46821	MAP1B_HUMAN	Microtubule associated protein 1B OS Homo sapiens GN MAP1B PE 1 SV 2	Regular	59.1312	28.34	271832	23	14	173	2.19	70592	18075.3	24545	4.2349	1.1512	Red	4752
5492	P54753	EPHB3_HUMAN	Ephrin type B receptor 3 OS Homo sapiens GN EPHB3 PE 1 SV 2	Regular	59.1221	28.3	111927	12	5	75	3.61	47139	3887.19	15136	0.9107	0.1019	Red	5490
3437	Q8N3K9	CMYA5_HUMAN	Cardiomyopathy associated protein 5 OS Homo sapiens GN CMYA5 PE 1 SV 3	Regular	58.877	28.37	451036	54	26	347	2.8	103080	15245	34356	3.5718	1.611	Red	13825 16073
4662	P15924	DESP_HUMAN	Desmoplakin OS Homo sapiens GN DSP PE 1 SV 3	Regular	58.8615	28.32	334227	45	24	266	2.19	146641	35576	42326	8.3352	2.7859	Red
7301	Q3V6T2	GRDN_HUMAN	Girdin OS Homo sapiens GN CCDC88A PE 1 SV 2	Regular	58.8576	28.28	216726	39	19	178	3.1	81014	29863	35086	6.9967	1.5164	Red
12748	Q9Y5E7	PCDB2_HUMAN	Protocadherin beta 2 OS Homo sapiens GN PCDHB2 PE 1 SV 1	Regular	58.6743	28.46	87767.2	12	7	46	3.26	37490	12674	7880	2.9694	0.2606	Red	12749 12758 12760
8556	P16144	ITB4_HUMAN	Integrin beta 4 OS Homo sapiens GN ITGB4 PE 1 SV 5	Regular	58.1342	28.53	205874	27	16	140	2.63	98042	36260	29489	8.4955	1.749	Red
11367	O94856	NFASC_HUMAN	Neurofascin OS Homo sapiens GN NFASC PE 1 SV 4	Regular	58.0009	28.59	150882	23	10	96	3.49	44805	18245	18260	4.2747	0.645	Red
11011	Q5VU43	MYOME_HUMAN	Myomegalin OS Homo sapiens GN PDE4DIP PE 2 SV 1	Regular	57.7968	28.77	266506	42	23	217	5.07	103155	14826	37938	3.4736	0.9257	Yellow	7106
3808	Q6ZWL3	CP4V2_HUMAN	Cytochrome P450 4V2 OS Homo sapiens GN CYP4V2 PE 1 SV 2	Regular	57.4073	28.95	61180.4	9	4	44	5.14	9181	7882.5	3110	1.8468	0.113	Red
17184	Q9BT92	TCHP_HUMAN	Trichoplein keratin filament binding protein OS Homo sapiens GN TCHP PE 1 SV 1	Regular	57.2473	29.01	61185.9	4	3	59	4.82	8154	7758	3646	1.8176	0.1112	Red
4160	O15320	CTGE5_HUMAN	Cutaneous T cell lymphoma associated antigen 5 OS Homo sapiens GN CTAGE5 PE 1 SV 4	Regular	57.1514	29.19	91281.6	11	6	72	5.6	55707	10390	11435	2.4343	0.2222	Red
11287	O76041	NEBL_HUMAN	Nebulette OS Homo sapiens GN NEBL PE 1 SV 1	Regular	57.0002	29.36	116682	16	10	102	5.23	39673	19462	8137	4.5598	0.532	Red
19566	Q9H2Y7	ZF106_HUMAN	Zinc finger protein 106 homolog OS Homo sapiens GN ZFP106 PE 1 SV 1	Regular	56.9541	29.31	210822	14	14	152	2.5	69507	31055	15996	7.276	1.5339	Red
3644	Q5KU26	COL12_HUMAN	Collectin 12 OS Homo sapiens GN COLEC12 PE 1 SV 3	Regular	56.8622	29.27	82085.5	19	8	65	1.08	58127	3645	12401	0.854	0.0701	Red	4967
13269	Q9NQ66	PLCB1_HUMAN	1 phosphatidylinositol 4 5 bisphosphate phosphodiesterase beta 1 OS Homo sapiens GN PLCB1 PE 1 SV 1	Regular	56.7565	29.22	139423	13	7	95	0.82	24677	19746	10384	4.6264	0.645	Red
17866	O94826	TOM70_HUMAN	Mitochondrial import receptor subunit TOM70 OS Homo sapiens GN TOMM70A PE 1 SV 1	Regular	56.7168	29.29	68139.3	7	4	50	4.44	39715	35180	4758	8.2424	0.5616	Red
16019	Q14BN4	SLMAP_HUMAN	Sarcolemmal membrane associated protein OS Homo sapiens GN SLMAP PE 1 SV 1	Regular	56.3013	29.77	96053.8	20	9	102	2.78	53133	5431.5	14355	1.2726	0.1222	Red
15425	Q14151	SAFB2_HUMAN	Scaffold attachment factor B2 OS Homo sapiens GN SAFB2 PE 1 SV 1	Regular	56.16	29.84	107987	8	5	98	6.93	21157	10565	14377	2.4753	0.2673	Red
14610	Q5UIP0	RIF1_HUMAN	Telomere associated protein RIF1 OS Homo sapiens GN RIF1 PE 1 SV 2	Regular	56.1132	29.79	276633	17	13	176	3.48	67884	41234	18420	9.6609	2.6725	Yellow	17816
16445	O15020	SPTN2_HUMAN	Spectrin beta chain non erythrocytic 2 OS Homo sapiens GN SPTBN2 PE 1 SV 3	Regular	56.0701	29.96	272694	32	17	221	2.01	133534	20537	24380	4.8117	1.3121	Red
13591	Q5THK1	PR14L_HUMAN	Protein PRR14L OS Homo sapiens GN PRR14L PE 1 SV 1	Regular	56.0451	29.91	241292	25	15	215	3.81	137428	35609	42032	8.343	2.0131	Red
5796	Q6ZUX3	F179A_HUMAN	Protein FAM179A OS Homo sapiens GN FAM179A PE 2 SV 2	Regular	55.8924	30.07	112066	11	7	92	3.93	41257	29316	13562	6.8686	0.7697	Red
4967	O75417	DPOLQ_HUMAN	DNA polymerase theta OS Homo sapiens GN POLQ PE 1 SV 2	Regular	55.8875	30.03	292471	42	22	214	3.55	177856	85404	47667	20.0096	5.8522	Red	3644
16870	Q96C24	SYTL4_HUMAN	Synaptotagmin like protein 4 OS Homo sapiens GN SYTL4 PE 1 SV 2	Regular	55.6212	30.19	76651	11	8	59	6.86	74111	4741.5	10251	1.1109	0.0852	Red
11383	Q6P4R8	NFRKB_HUMAN	Nuclear factor related to kappa B binding protein OS Homo sapiens GN NFRKB PE 1 SV 2	Regular	55.5822	30.15	139458	15	7	84	0.92	65411	4785	9331	1.1211	0.1563	Red	18131
14936	P30876	RPB2_HUMAN	DNA directed RNA polymerase II subunit RPB2 OS Homo sapiens GN POLR2B PE 1 SV 1	Regular	55.356	30.21	135323	13	8	102	2.47	22698	12672	8574	2.969	0.4018	Red
8699	Q9BY89	K1671_HUMAN	Uncharacterized protein KIAA1671 OS Homo sapiens GN KIAA1671 PE 1 SV 2	Regular	55.3462	30.16	197738	21	14	165	4.1	111482	20959	17530	4.9106	0.971	Red
10959	P12882	MYH1_HUMAN	Myosin 1 OS Homo sapiens GN MYH1 PE 1 SV 3	Regular	55.1202	30.32	224115	23	20	162	3.76	272597	5403	18749	1.2659	0.2837	Red	10962 10961 10966 10956 10964 10960 10965
18040	Q9NQ86	TRI36_HUMAN	E3 ubiquitin protein ligase TRIM36 OS Homo sapiens GN TRIM36 PE 2 SV 2	Regular	55.0992	30.28	84610.3	7	3	65	5.91	10586	7719	3670	1.8085	0.153	Red
2820	Q02224	CENPE_HUMAN	Centromere associated protein E OS Homo sapiens GN CENPE PE 1 SV 2	Regular	54.8183	30.23	317784	38	25	342	3.07	137225	26518	32622	6.213	1.9744	Red
19599	Q96KR1	ZFR_HUMAN	Zinc finger RNA binding protein OS Homo sapiens GN ZFR PE 1 SV 2	Regular	54.8105	30.19	118153	20	9	71	7.54	162973	146117	27656	34.2343	4.0449	Red
16634	Q9NUL3	STAU2_HUMAN	Double stranded RNA binding protein Staufen homolog 2 OS Homo sapiens GN STAU2 PE 1 SV 1	Regular	54.347	30.45	62868.8	7	7	52	11.58	27763	11502	6150	2.6948	0.1694	Red
8758	P08729	K2C7_HUMAN	Keratin type II cytoskeletal 7 OS Homo sapiens GN KRT7 PE 1 SV 5	Regular	54.3281	30.4	51442.8	10	6	38	4.05	14079	6774	9522	1.5871	0.0816	Red
10962	Q9Y623	MYH4_HUMAN	Myosin 4 OS Homo sapiens GN MYH4 PE 1 SV 2	Regular	54.2676	30.36	224041	27	20	163	3.51	284561	10377	27167	2.4313	0.5447	Red	10961 10966 10956 10964 10960 10959 10965
6245	P07332	FES_HUMAN	Tyrosine protein kinase Fes Fps OS Homo sapiens GN FES PE 1 SV 3	Regular	54.1844	30.32	94181	19	11	64	6.08	60127	15687	13573	3.6754	0.3461	Red
1079	P29374	ARI4A_HUMAN	AT rich interactive domain containing protein 4A OS Homo sapiens GN ARID4A PE 1 SV 3	Regular	54.1031	30.37	143721	18	9	113	2.47	120658	86385	32511	20.2395	2.9088	Red
12077	Q02218	ODO1_HUMAN	2 oxoglutarate dehydrogenase mitochondrial OS Homo sapiens GN OGDH PE 1 SV 3	Regular	54.0724	30.43	117133	14	8	71	6.26	39566	15350	6958	3.5964	0.4213	Red
18997	Q6ZQQ6	WDR87_HUMAN	WD repeat containing protein 87 OS Homo sapiens GN WDR87 PE 2 SV 3	Regular	53.9284	30.48	335467	35	19	293	2.33	92745	25495	30078	5.9733	2.0038	Red
4925	P09172	DOPO_HUMAN	Dopamine beta hydroxylase OS Homo sapiens GN DBH PE 1 SV 3	Regular	53.738	30.74	69920.5	5	3	43	1.94	28965	8130	1588	1.9048	0.1332	Red
14509	O14924	RGS12_HUMAN	Regulator of G protein signaling 12 OS Homo sapiens GN RGS12 PE 1 SV 1	Regular	53.6901	30.69	157897	24	15	99	8.36	72854	19555	20826	4.5816	0.7234	Red
12515	O00443	P3C2A_HUMAN	Phosphatidylinositol 4 phosphate 3 kinase C2 domain containing subunit alpha OS Homo sapiens GN PIK3	Regular	53.4342	30.75	192277	21	9	150	0.71	44386	24063	21791	5.6378	1.084	Red
120	P08195	4F2_HUMAN	4F2 cell surface antigen heavy chain OS Homo sapiens GN SLC3A2 PE 1 SV 3	Regular	53.2183	30.8	68222.2	14	6	47	1.75	28654	3771	9256	0.8835	0.0603	Red
1291	O43520	AT8B1_HUMAN	Probable phospholipid transporting ATPase IC OS Homo sapiens GN ATP8B1 PE 1 SV 3	Regular	53.1304	30.76	144893	19	11	86	6.08	80546	7688	11360	1.8012	0.261	Red
12386	Q13415	ORC1_HUMAN	Origin recognition complex subunit 1 OS Homo sapiens GN ORC1 PE 1 SV 2	Regular	52.8471	30.81	98433.4	10	8	67	3.14	41586	5536.94	6065	1.2973	0.1277	Red	18114
1613	Q13515	BFSP2_HUMAN	Phakinin OS Homo sapiens GN BFSP2 PE 1 SV 1	Regular	52.5268	31.06	46221.8	6	5	36	6.51	9511	2565	4983	0.601	0.0278	Red
6807	Q96RT8	GCP5_HUMAN	Gamma tubulin complex component 5 OS Homo sapiens GN TUBGCP5 PE 1 SV 1	Regular	52.1388	31.21	119176	16	10	83	3.03	34735	6704	10084	1.5707	0.1872	Red
7678	P14210	HGF_HUMAN	Hepatocyte growth factor OS Homo sapiens GN HGF PE 1 SV 2	Regular	51.9925	31.16	85472	8	5	54	3.16	125249	83851.5	17699	19.6459	1.6792	Red
8582	Q14643	ITPR1_HUMAN	Inositol 1 4 5 trisphosphate receptor type 1 OS Homo sapiens GN ITPR1 PE 1 SV 2	Regular	51.8448	31.22	317367	30	19	238	4.31	91460	25338	22164	5.9365	1.8841	Red	8584 8583
5656	Q8NEV8	EXPH5_HUMAN	Exophilin 5 OS Homo sapiens GN EXPH5 PE 1 SV 3	Regular	51.8073	31.17	223888	26	16	175	2.87	82264	19253	32667	4.5109	1.0099	Red
18868	Q9P1Q0	VPS54_HUMAN	Vacuolar protein sorting associated protein 54 OS Homo sapiens GN VPS54 PE 1 SV 2	Regular	51.6852	31.13	111616	13	8	68	5.94	44482	30038	14358	7.0377	0.7855	Red
8809	Q96EK5	KBP_HUMAN	KIF1 binding protein OS Homo sapiens GN KIAA1279 PE 1 SV 1	Regular	51.6812	31.09	72498.5	6	5	51	6.92	12187	3161	3766	0.7406	0.0537	Red
1590	A6H8Y1	BDP1_HUMAN	Transcription factor TFIIIB component B homolog OS Homo sapiens GN BDP1 PE 1 SV 3	Regular	51.2715	31.33	295539	40	20	255	3.2	79771	20841	29172	4.8829	1.4431	Red
3652	Q8NFW1	COMA1_HUMAN	Collagen alpha 1 XXII chain OS Homo sapiens GN COL22A1 PE 1 SV 2	Regular	51.2621	31.28	162172	22	12	109	3.2	52706	16353	12573	3.8314	0.6213	Red	3595
10117	Q5TCQ9	MAGI3_HUMAN	Membrane associated guanylate kinase WW and PDZ domain containing protein 3 OS Homo sapiens GN MAGI	Regular	51.0806	31.24	166520	18	12	117	5.64	91110	51784	15650	12.1327	2.0203	Red
17872	P11388	TOP2A_HUMAN	DNA topoisomerase 2 alpha OS Homo sapiens GN TOP2A PE 1 SV 3	Regular	51.039	31.29	175127	16	10	132	5.23	40901	22998	14846	5.3883	0.9436	Red	17873
6158	O75426	FBX24_HUMAN	F box only protein 24 OS Homo sapiens GN FBXO24 PE 2 SV 2	Regular	51.0297	31.25	66200.8	10	5	54	3.45	31389	24561	6870	5.7545	0.381	Red
6965	Q9Y223	GLCNE_HUMAN	Bifunctional UDP N acetylglucosamine 2 epimerase N acetylmannosamine kinase OS Homo sapiens GN GNE P	Regular	51.0151	31.21	80244.3	14	6	53	7.06	19656	12001	8814	2.8118	0.2256	Red
10148	P78559	MAP1A_HUMAN	Microtubule associated protein 1A OS Homo sapiens GN MAP1A PE 1 SV 6	Regular	50.9127	31.17	306968	24	11	232	2.53	139026	33903	74533	7.9433	2.4383	Red
2811	Q9HCU4	CELR2_HUMAN	Cadherin EGF LAG seven pass G type receptor 2 OS Homo sapiens GN CELSR2 PE 2 SV 1	Regular	50.8753	31.12	322414	22	14	181	1.51	70818	11306	22132	2.6489	0.8541	Red	2810
14982	Q5VT52	RPRD2_HUMAN	Regulation of nuclear pre mRNA domain containing protein 2 OS Homo sapiens GN RPRD2 PE 1 SV 1	Regular	50.3743	31.36	156476	14	10	111	3.9	70334	14844	10317	3.4779	0.5442	Red
8704	Q9C0B2	K1751_HUMAN	Uncharacterized protein KIAA1751 OS Homo sapiens GN KIAA1751 PE 2 SV 2	Regular	50.2047	31.78	87583.2	17	6	70	1.97	49364	26913	15718	6.3055	0.5523	Red
15172	Q92736	RYR2_HUMAN	Ryanodine receptor 2 OS Homo sapiens GN RYR2 PE 1 SV 3	Regular	50.1866	31.73	569701	55	35	397	3.22	274882	29595	56279	6.9339	3.9503	Red	15173 15171
4906	Q9H7D0	DOCK5_HUMAN	Dedicator of cytokinesis protein 5 OS Homo sapiens GN DOCK5 PE 1 SV 3	Regular	50.1494	31.69	216336	25	13	156	2.35	114714	73648	18872	17.2553	3.7329	Red
15147	Q8N2Y8	RUSC2_HUMAN	Iporin OS Homo sapiens GN RUSC2 PE 1 SV 3	Regular	50.1145	31.74	163336	22	13	80	5.21	52722	27601	20317	6.4667	1.0562	Red
10071	Q8WXG6	MADD_HUMAN	MAP kinase activating death domain protein OS Homo sapiens GN MADD PE 1 SV 2	Regular	50.0089	31.88	184615	16	7	120	1.58	56855	55714.5	10538	13.0536	2.4099	Red
18116	Q96Q11	TRNT1_HUMAN	CCA tRNA nucleotidyltransferase 1 mitochondrial OS Homo sapiens GN TRNT1 PE 1 SV 2	Regular	49.8686	31.84	50355.8	8	3	43	2.76	10793	14466	4262	3.3893	0.1707	Red
8615	Q15652	JHD2C_HUMAN	Probable JmjC domain containing histone demethylation protein 2C OS Homo sapiens GN JMJD1C PE 1 SV 2	Regular	49.811	31.79	286578	24	15	202	2.56	130390	16105	22086	3.7733	1.0813	Red
8944	Q6ZWB6	KCTD8_HUMAN	BTB POZ domain containing protein KCTD8 OS Homo sapiens GN KCTD8 PE 2 SV 1	Regular	49.7102	31.84	52896.1	6	3	40	3.38	15401	4776	1251	1.119	0.0592	Red
11674	Q86VF7	NRAP_HUMAN	Nebulin related anchoring protein OS Homo sapiens GN NRAP PE 2 SV 2	Regular	49.6455	31.89	198044	34	18	168	2.2	104852	10665	35603	2.4987	0.4949	Red
9416	Q13753	LAMC2_HUMAN	Laminin subunit gamma 2 OS Homo sapiens GN LAMC2 PE 1 SV 2	Regular	49.5268	32.03	134854	16	10	82	2.18	39147	26452.5	14131	6.1977	0.8358	Red
16438	P11277	SPTB1_HUMAN	Spectrin beta chain erythrocytic OS Homo sapiens GN SPTB PE 1 SV 5	Regular	49.2459	32.51	247324	26	16	217	3.51	68023	10402	18729	2.4371	0.6028	Red
13311	Q96Q06	PLIN4_HUMAN	Perilipin 4 OS Homo sapiens GN PLIN4 PE 2 SV 2	Regular	49.2125	32.47	135287	19	10	137	3.76	41598	8935	12704	2.0934	0.2832	Red
841	O15084	ANR28_HUMAN	Serine threonine protein phosphatase 6 regulatory ankyrin repeat subunit A OS Homo sapiens GN ANKRD2	Regular	49.1246	32.52	114677	14	5	61	4.18	25119	22725	8669	5.3243	0.6106	Red
10925	Q9NR99	MXRA5_HUMAN	Matrix remodeling associated protein 5 OS Homo sapiens GN MXRA5 PE 2 SV 3	Regular	49.1156	32.47	314261	25	18	205	3.18	98018	23618	29675	5.5335	1.739	Red
2770	O15078	CE290_HUMAN	Centrosomal protein of 290 kDa OS Homo sapiens GN CEP290 PE 1 SV 2	Regular	48.6179	33.04	291071	51	30	293	3.99	233157	74917	45976	17.5526	5.109	Red	23872
4961	Q9UHN1	DPOG2_HUMAN	DNA polymerase subunit gamma 2 mitochondrial OS Homo sapiens GN POLG2 PE 1 SV 1	Regular	48.4764	33.08	55538.4	5	5	44	7.42	31388	14230	3250	3.334	0.1852	Red
8991	Q96Q89	KI20B_HUMAN	Kinesin like protein KIF20B OS Homo sapiens GN KIF20B PE 1 SV 3	Regular	48.4482	33.04	211998	26	13	197	3.35	56384	16305	25072	3.8202	0.8099	Red
14167	P46060	RAGP1_HUMAN	Ran GTPase activating protein 1 OS Homo sapiens GN RANGAP1 PE 1 SV 1	Regular	48.0652	33.5	63998.3	6	3	41	4.26	7220	7588.5	3027	1.7779	0.1138	Red
14912	P56715	RP1_HUMAN	Oxygen regulated protein 1 OS Homo sapiens GN RP1 PE 1 SV 1	Regular	47.9627	33.54	243513	31	15	159	2.37	68221	16859	19819	3.95	0.9619	Red
2372	Q8NDH2	CC168_HUMAN	Coiled coil domain containing protein 168 OS Homo sapiens GN CCDC168 PE 2 SV 2	Regular	47.9465	33.58	279776	54	29	221	4.24	141024	13705	44590	3.211	0.8984	Red	12466
18370	P29597	TYK2_HUMAN	Non receptor tyrosine protein kinase TYK2 OS Homo sapiens GN TYK2 PE 1 SV 3	Regular	47.9464	33.54	135475	15	10	96	3.96	29320	10635	15848	2.4917	0.3376	Red
1176	Q8TDY4	ASAP3_HUMAN	Arf GAP with SH3 domain ANK repeat and PH domain containing protein 3 OS Homo sapiens GN ASAP3 PE 1	Regular	47.9151	33.5	100239	10	9	61	4.98	62128	4093.5	13375	0.9591	0.0961	Red
4070	P13611	CSPG2_HUMAN	Versican core protein OS Homo sapiens GN VCAN PE 1 SV 3	Regular	47.913	33.46	374816	27	12	199	2.5	137787	45211	21688	10.5927	3.9703	Red
2390	A6NC98	CC88B_HUMAN	Coiled coil domain containing protein 88B OS Homo sapiens GN CCDC88B PE 1 SV 1	Regular	47.8995	33.42	165266	22	12	154	1.83	61246	36925	16744	8.6513	1.4298	Red	31374
10965	P12883	MYH7_HUMAN	Myosin 7 OS Homo sapiens GN MYH7 PE 1 SV 5	Regular	47.8797	33.46	223896	27	22	161	2.79	292714	29985.6	24135	7.0254	1.573	Red	10962 10961 10966 10956 10964 10960 10959
7448	Q7Z2Y8	GVIN1_HUMAN	Interferon induced very large GTPase 1 OS Homo sapiens GN GVINP1 PE 2 SV 2	Regular	47.8302	33.5	282128	35	20	194	5.37	139298	27470	23854	6.436	1.8158	Red
16765	O95425	SVIL_HUMAN	Supervillin OS Homo sapiens GN SVIL PE 1 SV 2	Regular	47.7666	33.46	249572	30	20	185	4.29	85706	17959	19716	4.2077	1.0501	Red
12976	O43933	PEX1_HUMAN	Peroxisome biogenesis factor 1 OS Homo sapiens GN PEX1 PE 1 SV 1	Regular	47.7072	33.5	143894	11	6	97	0.78	35932	12774	11746	2.9929	0.4307	Red
16577	O60284	ST18_HUMAN	Suppression of tumorigenicity 18 protein OS Homo sapiens GN ST18 PE 1 SV 1	Regular	47.7032	33.46	116923	14	8	95	4.2	38208	16067	10740	3.7644	0.4401	Red
10776	P52701	MSH6_HUMAN	DNA mismatch repair protein Msh6 OS Homo sapiens GN MSH6 PE 1 SV 2	Regular	47.6242	33.5	154611	18	12	98	6.54	32171	8303	12606	1.9453	0.3008	Red
9047	Q9BVG8	KIFC3_HUMAN	Kinesin like protein KIFC3 OS Homo sapiens GN KIFC3 PE 1 SV 4	Regular	47.5621	33.54	93459.4	14	8	66	4.2	19412	9182	8888	2.1513	0.2011	Red
846	Q8N283	ANR35_HUMAN	Ankyrin repeat domain containing protein 35 OS Homo sapiens GN ANKRD35 PE 2 SV 2	Regular	47.4733	33.58	110878	18	10	87	5.29	38553	6224	13746	1.4582	0.1617	Red
9406	P25391	LAMA1_HUMAN	Laminin subunit alpha 1 OS Homo sapiens GN LAMA1 PE 1 SV 2	Regular	47.3752	33.54	346551	29	16	223	2.34	76413	18620	20779	4.3625	1.5118	Red
18695	P46939	UTRO_HUMAN	Utrophin OS Homo sapiens GN UTRN PE 1 SV 2	Regular	47.3452	33.5	396691	53	31	280	2.33	107569	14651	40277	3.4326	1.3617	Red	4829
13272	Q15147	PLCB4_HUMAN	1 phosphatidylinositol 4 5 bisphosphate phosphodiesterase beta 4 OS Homo sapiens GN PLCB4 PE 1 SV 3	Regular	47.143	33.54	135604	18	10	115	3.49	86325	27377	13832	6.4143	0.8698	Red
19536	Q9HCK1	ZDBF2_HUMAN	DBF4 type zinc finger containing protein 2 OS Homo sapiens GN ZDBF2 PE 1 SV 3	Regular	47.1265	33.5	268755	20	10	182	2.12	170343	46011	27413	10.7801	2.8972	Red
17879	Q8N9V7	TOPZ1_HUMAN	Testis and ovary specific PAZ domain containing protein 1 OS Homo sapiens GN TOPAZ1 PE 2 SV 3	Regular	46.9636	33.54	193436	12	8	149	3.78	33850	24097	5456	5.6458	1.0921	Red
9959	O60449	LY75_HUMAN	Lymphocyte antigen 75 OS Homo sapiens GN LY75 PE 1 SV 3	Regular	46.9401	33.5	201961	15	9	130	2.09	32754	8978	8209	2.1035	0.4248	Red
6955	Q7Z4J2	GL6D1_HUMAN	Glycosyltransferase 6 domain containing protein 1 OS Homo sapiens GN GLT6D1 PE 2 SV 1	Regular	46.9182	33.45	36330.9	5	3	24	5.84	8373	10920	2936	2.5585	0.093	Red
2121	Q6IMN6	CAPR2_HUMAN	Caprin 2 OS Homo sapiens GN CAPRIN2 PE 1 SV 1	Regular	46.8892	33.41	126552	12	6	81	2.93	31498	10560	13745	2.4741	0.3131	Red
10135	Q8IZL2	MAML2_HUMAN	Mastermind like protein 2 OS Homo sapiens GN MAML2 PE 1 SV 2	Regular	46.8876	33.37	125482	8	6	53	2.51	15612	6795	5989	1.592	0.1998	Red
13578	Q9H7J1	PPR3E_HUMAN	Protein phosphatase 1 regulatory subunit 3E OS Homo sapiens GN PPP1R3E PE 2 SV 2	Regular	46.8843	33.33	30757.6	10	4	22	6.45	9312	8604	7272	2.0159	0.062	Red
10706	Q99550	MPP9_HUMAN	M phase phosphoprotein 9 OS Homo sapiens GN MPHOSPH9 PE 1 SV 3	Regular	46.8327	33.29	116705	12	6	83	2.33	154870	293676	15346	68.8064	8.03	Red
11627	Q12980	NPRL3_HUMAN	Nitrogen permease regulator 3 like protein OS Homo sapiens GN NPRL3 PE 1 SV 1	Regular	46.8196	33.25	64175.4	10	4	38	5.62	67081	26199	5002	6.1383	0.3939	Red
15753	A8K8P3	SFI1_HUMAN	Protein SFI1 homolog OS Homo sapiens GN SFI1 PE 1 SV 2	Regular	46.5929	33.45	149032	19	9	102	2.01	44182	7069	24258	1.6562	0.2468	Red
10955	P35749	MYH11_HUMAN	Myosin 11 OS Homo sapiens GN MYH11 PE 1 SV 3	Regular	46.5902	33.41	228195	30	19	161	3.7	59171	10632	16964	2.491	0.5684	Red	10957 10954 10967
4549	Q14203	DCTN1_HUMAN	Dynactin subunit 1 OS Homo sapiens GN DCTN1 PE 1 SV 3	Regular	46.563	33.37	142436	14	7	105	4.93	22778	15060	21787	3.5285	0.5026	Yellow	15039
6405	Q9P278	FNIP2_HUMAN	Folliculin interacting protein 2 OS Homo sapiens GN FNIP2 PE 1 SV 2	Regular	46.4522	33.33	123712	5	4	81	3.05	14127	10650	3915	2.4952	0.3087	Red
10449	O43451	MGA_HUMAN	Maltase glucoamylase intestinal OS Homo sapiens GN MGAM PE 1 SV 5	Regular	46.3999	33.45	211164	22	10	108	2.37	47758	8395	16638	1.9669	0.4153	Red
10062	Q6ZN28	MACC1_HUMAN	Metastasis associated in colon cancer protein 1 OS Homo sapiens GN MACC1 PE 1 SV 2	Regular	46.3604	33.41	97437.7	8	5	65	1.41	23656	21675	6263	5.0783	0.4948	Red
520	Q8N4X5	AF1L2_HUMAN	Actin filament associated protein 1 like 2 OS Homo sapiens GN AFAP1L2 PE 1 SV 1	Regular	46.3421	33.37	92212.2	8	7	63	3.18	18299	6084	6636	1.4254	0.1314	Red
10360	Q14D04	MELT_HUMAN	Ventricular zone expressed PH domain containing protein homolog 1 OS Homo sapiens GN VEPH1 PE 1 SV 1	Regular	46.258	33.49	95543.9	12	4	65	4.08	12455	12637.5	9242	2.9609	0.2829	Red
13347	O75051	PLXA2_HUMAN	Plexin A2 OS Homo sapiens GN PLXNA2 PE 1 SV 4	Regular	46.1996	33.61	214355	15	12	128	1.53	61821	10559	9836	2.4739	0.5303	Red
9804	Q9C099	LRCC1_HUMAN	Leucine rich repeat and coiled coil domain containing protein 1 OS Homo sapiens GN LRRCC1 PE 2 SV 2	Regular	46.1869	33.57	120794	17	8	110	2.52	95156	55992	10191	13.1186	1.5846	Red
10043	Q8IVH8	M4K3_HUMAN	Mitogen activated protein kinase kinase kinase kinase 3 OS Homo sapiens GN MAP4K3 PE 1 SV 1	Regular	45.8939	34	102514	10	6	65	3.13	11344	4512	11681	1.0571	0.1084	Red
8687	Q8NCU4	K1407_HUMAN	Coiled coil domain containing protein KIAA1407 OS Homo sapiens GN KIAA1407 PE 2 SV 1	Regular	45.845	33.96	111081	16	8	82	3.1	85386	57019.5	18989	13.3593	1.484	Red
15657	Q14563	SEM3A_HUMAN	Semaphorin 3A OS Homo sapiens GN SEMA3A PE 2 SV 1	Regular	45.5734	33.99	89973	11	6	67	0.78	26570	8442	7134	1.9779	0.178	Red
14267	Q5T481	RBM20_HUMAN	Probable RNA binding protein 20 OS Homo sapiens GN RBM20 PE 1 SV 3	Regular	45.5433	33.95	135498	11	4	94	0.9	17132	21942	7222	5.1409	0.6966	Red
5123	Q9NYC9	DYH9_HUMAN	Dynein heavy chain 9 axonemal OS Homo sapiens GN DNAH9 PE 1 SV 3	Regular	45.5034	33.99	515927	70	40	367	2.34	256492	81361	50350	19.0624	9.8348	Red	36307 5112 5115
11818	Q14980	NUMA1_HUMAN	Nuclear mitotic apparatus protein 1 OS Homo sapiens GN NUMA1 PE 1 SV 2	Regular	45.4735	33.95	239343	28	17	209	2.93	72995	16037	19044	3.7574	0.8993	Red
1121	Q7L311	ARMX2_HUMAN	Armadillo repeat containing X linked protein 2 OS Homo sapiens GN ARMCX2 PE 2 SV 1	Regular	44.9867	34.44	65968.7	3	2	38	3.8	48273	72409.5	1660	16.9651	1.1192	Red
9535	Q8NC56	LEMD2_HUMAN	LEM domain containing protein 2 OS Homo sapiens GN LEMD2 PE 1 SV 1	Regular	44.8452	34.48	57374.4	6	4	45	5.96	6540	4292	4797	1.0056	0.0577	Red
9408	Q16787	LAMA3_HUMAN	Laminin subunit alpha 3 OS Homo sapiens GN LAMA3 PE 1 SV 2	Regular	44.8044	34.44	375888	31	17	257	1.74	88702	8644	22183	2.0252	0.7613	Red
13525	Q8NEY8	PPHLN_HUMAN	Periphilin 1 OS Homo sapiens GN PPHLN1 PE 1 SV 2	Regular	44.7463	34.55	52851.2	3	4	51	4.37	20834	7404	19565	1.7347	0.0917	Red
9039	Q12840	KIF5A_HUMAN	Kinesin heavy chain isoform 5A OS Homo sapiens GN KIF5A PE 1 SV 2	Regular	44.6195	34.73	118234	11	7	95	3.78	174334	19401	40169	4.5455	0.5374	Red
11489	Q86UT6	NLRX1_HUMAN	NLR family member X1 OS Homo sapiens GN NLRX1 PE 1 SV 1	Regular	44.6016	34.69	108643	13	7	72	1.54	38715	6828	8012	1.5998	0.1738	Red
13836	A5PKW4	PSD1_HUMAN	PH and SEC7 domain containing protein 1 OS Homo sapiens GN PSD PE 2 SV 2	Regular	44.5674	34.65	110170	13	6	69	4.79	62113	7494	14720	1.7558	0.1934	Red
15675	Q8NFY4	SEM6D_HUMAN	Semaphorin 6D OS Homo sapiens GN SEMA6D PE 1 SV 1	Regular	44.2658	35.06	121127	15	5	75	3.82	18882	7695	10511	1.8029	0.2184	Red	11326 4025
15121	O95197	RTN3_HUMAN	Reticulon 3 OS Homo sapiens GN RTN3 PE 1 SV 2	Regular	44.0156	35.23	113238	19	7	84	7.27	37237	26245	13207	6.149	0.6963	Red
6070	Q96K12	FACR2_HUMAN	Fatty acyl CoA reductase 2 OS Homo sapiens GN FAR2 PE 2 SV 1	Regular	43.7947	35.41	59894.8	8	3	38	4.47	18584	23091	7012	5.4101	0.324	Red
14168	Q9P0K7	RAI14_HUMAN	Ankycorbin OS Homo sapiens GN RAI14 PE 1 SV 2	Regular	43.7917	35.37	110669	12	7	96	2.35	31617	10933.5	9353	2.5616	0.2835	Red
18019	Q07283	TRHY_HUMAN	Trichohyalin OS Homo sapiens GN TCHH PE 1 SV 2	Regular	43.6783	35.48	254382	23	12	224	2.88	69804	29370	15128	6.8812	1.7505	Red
17037	Q9C0D5	TANC1_HUMAN	Protein TANC1 OS Homo sapiens GN TANC1 PE 1 SV 3	Regular	43.6219	35.44	204387	23	12	129	2.04	121044	20337	15347	4.7648	0.9739	Red
750	Q9BXX3	AN30A_HUMAN	Ankyrin repeat domain containing protein 30A OS Homo sapiens GN ANKRD30A PE 1 SV 3	Regular	43.4836	35.4	160546	20	10	134	0.5	44836	7224	19531	1.6925	0.2717	Yellow	751
787	Q01484	ANK2_HUMAN	Ankyrin 2 OS Homo sapiens GN ANK2 PE 1 SV 4	Regular	43.209	35.5	436224	41	27	326	2.6	172912	42329	33941	9.9174	4.3262	Red	788
13281	P19174	PLCG1_HUMAN	1 phosphatidylinositol 4 5 bisphosphate phosphodiesterase gamma 1 OS Homo sapiens GN PLCG1 PE 1 SV 1	Regular	43.1866	35.46	149844	12	7	96	2.02	22703	9936	10778	2.3279	0.3488	Red
12812	O95613	PCNT_HUMAN	Pericentrin OS Homo sapiens GN PCNT PE 1 SV 4	Regular	42.9686	35.92	380832	51	28	342	2.04	179485	20495	42308	4.8018	1.8287	Red	618 21745
17946	Q4KMQ1	TPRN_HUMAN	Taperin OS Homo sapiens GN TPRN PE 2 SV 2	Regular	42.8827	36.16	75841	12	9	50	2.81	67399	3214	13366	0.753	0.0571	Red
18405	O75643	U520_HUMAN	U5 small nuclear ribonucleoprotein 200 kDa helicase OS Homo sapiens GN SNRNP200 PE 1 SV 2	Regular	42.767	36.26	246162	23	16	177	2.11	86204	9383	19670	2.1984	0.5412	Red
631	Q12802	AKP13_HUMAN	A kinase anchor protein 13 OS Homo sapiens GN AKAP13 PE 1 SV 2	Regular	42.6785	36.49	310573	25	15	272	1.96	163077	11939	19254	2.7972	0.8687	Red
17286	O43151	TET3_HUMAN	Methylcytosine dioxygenase TET3 OS Homo sapiens GN TET3 PE 2 SV 3	Regular	42.6009	36.45	181118	18	11	117	3.13	73704	6336	13080	1.4845	0.2689	Red	17285
6551	Q6P4F1	FUT10_HUMAN	Alpha 1 3 fucosyltransferase 10 OS Homo sapiens GN FUT10 PE 2 SV 2	Regular	42.4211	36.48	56664.7	8	5	42	4.18	8681	7792.5	4826	1.8257	0.1035	Red
8020	Q4G0P3	HYDIN_HUMAN	Hydrocephalus inducing protein homolog OS Homo sapiens GN HYDIN PE 1 SV 3	Regular	42.4118	36.44	581311	40	25	346	2.15	78115	10811	22463	2.5329	1.4724	Red
12866	P51160	PDE6C_HUMAN	Cone cGMP specific 3 5 cyclic phosphodiesterase subunit alpha OS Homo sapiens GN PDE6C PE 1 SV 2	Regular	42.2884	36.4	99831.3	6	7	86	2.45	24728	4359	6429	1.0213	0.102	Red
5118	Q8TD57	DYH3_HUMAN	Dynein heavy chain 3 axonemal OS Homo sapiens GN DNAH3 PE 2 SV 1	Regular	42.2857	36.36	474080	39	21	343	2.75	138064	14065.4	22122	3.2954	1.5623	Red	5116
10557	Q03164	MLL1_HUMAN	Histone lysine N methyltransferase MLL OS Homo sapiens GN MLL PE 1 SV 5	Regular	42.2009	36.32	436327	36	16	260	1.06	88943	37628	25274	8.816	3.8467	Yellow	10560
3586	P0C0L5	CO4B_HUMAN	Complement C4 B OS Homo sapiens GN C4B PE 1 SV 1	Regular	42.1487	36.42	194333	22	11	118	2.64	73095	46779	15523	10.96	2.1299	Red
5852	Q5VWN6	F208B_HUMAN	Protein FAM208B OS Homo sapiens GN FAM208B PE 1 SV 1	Regular	42.1484	36.38	271865	20	13	180	2.22	31891	13115	15989	3.0728	0.8354	Red
19745	O60281	ZN292_HUMAN	Zinc finger protein 292 OS Homo sapiens GN ZNF292 PE 1 SV 3	Regular	41.9286	36.55	309720	19	13	190	2.2	40526	17689	20864	4.1444	1.2836	Red
13946	P23468	PTPRD_HUMAN	Receptor type tyrosine protein phosphatase delta OS Homo sapiens GN PTPRD PE 1 SV 2	Regular	41.8908	36.51	215787	23	14	131	2.88	89772	11753	13799	2.7537	0.5942	Red	13948 13958
13282	P16885	PLCG2_HUMAN	1 phosphatidylinositol 4 5 bisphosphate phosphodiesterase gamma 2 OS Homo sapiens GN PLCG2 PE 1 SV 4	Regular	41.8112	36.47	149068	16	10	107	2.37	91473	3669	12368	0.8596	0.1281	Red
2769	Q8TEP8	CE192_HUMAN	Centrosomal protein of 192 kDa OS Homo sapiens GN CEP192 PE 1 SV 2	Regular	41.702	36.5	215313	18	8	124	2.11	81980	20337	9976	4.7648	1.0259	Red
11000	Q13402	MYO7A_HUMAN	Unconventional myosin VIIa OS Homo sapiens GN MYO7A PE 1 SV 1	Regular	41.6853	36.53	256574	28	16	173	3.3	118477	11684	18792	2.7375	0.7024	Red
862	A6NC57	ANR62_HUMAN	Ankyrin repeat domain containing protein 62 OS Homo sapiens GN ANKRD62 PE 2 SV 4	Regular	41.6663	36.55	107758	10	5	99	3.49	9282	5167.5	8016	1.2107	0.1305	Red
10909	Q2TAK8	MUM1_HUMAN	PWWP domain containing protein MUM1 OS Homo sapiens GN MUM1 PE 1 SV 3	Regular	41.6414	36.58	79719.8	14	8	52	1.27	39255	4308	14716	1.0093	0.0805	Red
8400	Q96HW7	INT4_HUMAN	Integrator complex subunit 4 OS Homo sapiens GN INTS4 PE 1 SV 2	Regular	41.6118	36.61	109141	20	8	87	1.77	131969	211098	25441	49.4589	5.398	Red
18613	Q9NYU1	UGGG2_HUMAN	UDP glucose glycoprotein glucosyltransferase 2 OS Homo sapiens GN UGGT2 PE 1 SV 4	Regular	41.5903	36.64	175363	20	15	128	2.64	46998	13872	12676	3.2501	0.57	Red
7930	Q7Z6Z7	HUWE1_HUMAN	E3 ubiquitin protein ligase HUWE1 OS Homo sapiens GN HUWE1 PE 1 SV 3	Regular	41.5017	36.67	485826	43	24	305	2.67	140797	19795	24148	4.6378	2.2532	Red
17373	Q6YHU6	THADA_HUMAN	Thyroid adenoma associated protein OS Homo sapiens GN THADA PE 1 SV 1	Regular	41.4724	36.69	223029	13	12	134	4.4	118951	12267	22620	2.8741	0.641	Red
11100	Q86W28	NALP8_HUMAN	NACHT LRR and PYD domains containing protein 8 OS Homo sapiens GN NLRP8 PE 2 SV 2	Regular	41.4441	36.66	121939	5	7	71	3.63	20285	10631	8037	2.4908	0.3037	Red
8602	P23458	JAK1_HUMAN	Tyrosine protein kinase JAK1 OS Homo sapiens GN JAK1 PE 1 SV 2	Regular	41.6633	36.62	135102	18	9	109	1.3	98910	3028.74	10204	0.7096	0.0959	Red	37348 31792 8335 16018 1067
14528	A5PLK6	RGSL_HUMAN	Regulator of G protein signaling protein like OS Homo sapiens GN RGSL1 PE 2 SV 1	Regular	41.3884	36.58	126886	9	8	85	2.6	20939	15498	9521	3.6311	0.4607	Red
7320	Q16478	GRIK5_HUMAN	Glutamate receptor ionotropic kainate 5 OS Homo sapiens GN GRIK5 PE 2 SV 2	Regular	41.3562	36.54	110406	9	6	74	6.33	22041	17022	8467	3.9881	0.4403	Red
10560	Q9UMN6	MLL4_HUMAN	Histone lysine N methyltransferase MLL4 OS Homo sapiens GN WBP7 PE 1 SV 1	Regular	41.3274	36.5	297849	31	13	193	4.57	68377	14817	16421	3.4715	1.034	Red	10557
8586	Q9NZM3	ITSN2_HUMAN	Intersectin 2 OS Homo sapiens GN ITSN2 PE 1 SV 3	Regular	41.1883	36.53	194545	29	15	135	2.47	80085	8434	16523	1.976	0.3844	Red
17816	O95271	TNKS1_HUMAN	Tankyrase 1 OS Homo sapiens GN TNKS PE 1 SV 2	Regular	41.1367	36.49	143808	18	8	100	1.51	64858	35500.5	8953	8.3175	1.1961	Red	17817 14610
13956	Q9UMZ3	PTPRQ_HUMAN	Phosphotidylinositol phosphatase PTPRQ OS Homo sapiens GN PTPRQ PE 1 SV 2	Regular	41.1076	36.46	262293	23	11	132	2.4	86593	6795	17301	1.592	0.4176	Red
3632	Q9UP83	COG5_HUMAN	Conserved oligomeric Golgi complex subunit 5 OS Homo sapiens GN COG5 PE 1 SV 3	Regular	40.9415	36.42	93199.2	10	5	68	4.17	79902	69429	9319	16.2668	1.5161	Red
14033	Q04671	P_HUMAN	P protein OS Homo sapiens GN OCA2 PE 1 SV 2	Regular	40.7678	36.58	93705.2	8	3	46	2.51	7982	6714	7154	1.573	0.1474	Red
7106	Q13439	GOGA4_HUMAN	Golgin subfamily A member 4 OS Homo sapiens GN GOLGA4 PE 1 SV 1	Regular	40.7217	36.61	262053	45	23	278	2.15	172114	12275	32435	2.876	0.7537	Red	11011
11006	Q9NZM1	MYOF_HUMAN	Myoferlin OS Homo sapiens GN MYOF PE 1 SV 1	Regular	40.7085	36.57	236249	23	14	164	3.74	56575	21386	14078	5.0106	1.1837	Red
530	Q9UHB7	AFF4_HUMAN	AF4 FMR2 family member 4 OS Homo sapiens GN AFF4 PE 1 SV 1	Regular	40.7015	36.6	127859	9	7	105	9.11	43737	29108	14561	6.8198	0.872	Red
9699	P18054	LOX12_HUMAN	Arachidonate 12 lipoxygenase 12S type OS Homo sapiens GN ALOX12 PE 1 SV 4	Regular	40.5722	36.69	76663.7	10	5	56	5.88	39935	5752	6079	1.3477	0.1033	Red
3593	P12111	CO6A3_HUMAN	Collagen alpha 3 VI chain OS Homo sapiens GN COL6A3 PE 1 SV 5	Regular	40.5444	36.71	345381	46	23	237	2.83	129953	46874	31346	10.9823	3.7931	Red
13420	Q7Z5L7	PODN_HUMAN	Podocan OS Homo sapiens GN PODN PE 1 SV 2	Regular	40.4955	36.68	69204	6	6	48	4.89	51393	41706	7179	9.7714	0.6762	Red
2441	Q6ZRK6	CCD73_HUMAN	Coiled coil domain containing protein 73 OS Homo sapiens GN CCDC73 PE 1 SV 2	Regular	40.4555	36.64	125124	14	8	125	3.99	109485	14181	20609	3.3225	0.4157	Red
13695	P78527	PRKDC_HUMAN	DNA dependent protein kinase catalytic subunit OS Homo sapiens GN PRKDC PE 1 SV 3	Regular	40.4186	36.79	474051	54	28	352	3.03	111891	30581	36586	7.1649	3.3965	Red	18825
13935	P35236	PTN7_HUMAN	Tyrosine protein phosphatase non receptor type 7 OS Homo sapiens GN PTPN7 PE 1 SV 3	Regular	40.3765	36.76	40985.5	4	4	28	4.44	43614	13291.5	5716	3.1141	0.1276	Red
10705	Q99549	MPP8_HUMAN	M phase phosphoprotein 8 OS Homo sapiens GN MPHOSPH8 PE 1 SV 2	Regular	40.2777	36.72	97695.6	10	6	63	3.14	42639	5248.5	6118	1.2297	0.1201	Red
5121	Q8WXX0	DYH7_HUMAN	Dynein heavy chain 7 axonemal OS Homo sapiens GN DNAH7 PE 1 SV 2	Regular	40.2472	36.75	464696	43	26	327	1.49	134166	15135	40583	3.546	1.6478	Yellow
9972	P07948	LYN_HUMAN	Tyrosine protein kinase Lyn OS Homo sapiens GN LYN PE 1 SV 3	Regular	40.2379	36.71	59030.4	4	4	44	2.54	20999	22839	10687	5.351	0.3159	Red
17291	Q8IWB6	TEX14_HUMAN	Inactive serine threonine protein kinase TEX14 OS Homo sapiens GN TEX14 PE 1 SV 2	Regular	40.1958	36.67	169213	19	7	123	1.2	53544	39094.5	24591	9.1596	1.5499	Red	21624 11792
17113	Q15814	TBCC_HUMAN	Tubulin specific chaperone C OS Homo sapiens GN TBCC PE 1 SV 2	Regular	40.0818	36.76	39761.4	9	5	36	8.38	12788	6300	7076	1.476	0.0587	Red
942	O95996	APC2_HUMAN	Adenomatous polyposis coli protein 2 OS Homo sapiens GN APC2 PE 1 SV 1	Regular	39.996	36.73	246116	31	17	203	1.22	80084	11942	27774	2.7979	0.6886	Red	948
6147	Q6X9E4	FBW12_HUMAN	F box WD repeat containing protein 12 OS Homo sapiens GN FBXW12 PE 2 SV 2	Regular	39.9091	36.75	53968.7	6	3	36	6.25	8119	10158	3453	2.38	0.1284	Red
18285	P33981	TTK_HUMAN	Dual specificity protein kinase TTK OS Homo sapiens GN TTK PE 1 SV 2	Regular	39.8161	36.78	98041.9	14	6	68	3.85	43981	12918	10398	3.0266	0.2967	Red
5200	Q5VYK3	ECM29_HUMAN	Proteasome associated protein ECM29 homolog OS Homo sapiens GN ECM29 PE 1 SV 2	Regular	39.6593	36.81	206116	22	13	138	2.22	61584	25017	14189	5.8613	1.2081	Red
18666	Q5DID0	UROL1_HUMAN	Uromodulin like 1 OS Homo sapiens GN UMODL1 PE 2 SV 2	Regular	39.4775	36.83	146803	8	6	66	2.96	43650	9365	19548	2.1942	0.3221	Red
17448	Q96MW7	TIGD1_HUMAN	Tigger transposable element derived protein 1 OS Homo sapiens GN TIGD1 PE 2 SV 1	Regular	39.4695	36.8	67470.4	10	8	48	1.69	44079	6675	11487	1.5639	0.1055	Red
18772	P17948	VGFR1_HUMAN	Vascular endothelial growth factor receptor 1 OS Homo sapiens GN FLT1 PE 1 SV 2	Regular	39.4224	36.76	152651	17	12	118	4.41	46401	5728	13203	1.342	0.2049	Yellow	18774
9018	Q96FN5	KIF12_HUMAN	Kinesin like protein KIF12 OS Homo sapiens GN KIF12 PE 2 SV 3	Regular	39.2561	37.03	71857.8	11	5	52	1.39	86598	6594	9740	1.5449	0.111	Red
9024	O60333	KIF1B_HUMAN	Kinesin like protein KIF1B OS Homo sapiens GN KIF1B PE 1 SV 5	Regular	39.2186	37	205902	17	8	154	2.48	40714	13251.8	7779	3.1048	0.6393	Red	9025
15540	Q9BY12	SCAPE_HUMAN	S phase cyclin A associated protein in the endoplasmic reticulum OS Homo sapiens GN SCAPER PE 1 SV 1	Regular	39.0031	37.02	159810	6	6	116	1.93	45327	12680	7177	2.9708	0.4748	Red
15566	Q99250	SCN2A_HUMAN	Sodium channel protein type 2 subunit alpha OS Homo sapiens GN SCN2A PE 1 SV 3	Regular	38.809	37.23	230142	14	6	128	1.5	60389	13089	9489	3.0667	0.7058	Red	15575
8796	Q92830	KAT2A_HUMAN	Histone acetyltransferase KAT2A OS Homo sapiens GN KAT2A PE 1 SV 3	Regular	38.7337	37.2	94895.2	14	7	59	3.7	56613	31321	9491	7.3383	0.6964	Red
17316	Q12789	TF3C1_HUMAN	General transcription factor 3C polypeptide 1 OS Homo sapiens GN GTF3C1 PE 1 SV 4	Regular	38.6613	37.16	241213	20	12	171	2.75	143403	38953	19398	9.1264	2.2014	Red
9777	Q96CN5	LRC45_HUMAN	Leucine rich repeat containing protein 45 OS Homo sapiens GN LRRC45 PE 2 SV 1	Regular	38.5282	37.18	76521.6	19	8	63	1.79	55109	13086	14420	3.066	0.2346	Red
18823	Q7Z7G8	VP13B_HUMAN	Vacuolar protein sorting associated protein 13B OS Homo sapiens GN VPS13B PE 1 SV 2	Regular	38.4928	37.21	454596	30	19	262	2.34	82424	28477	22117	6.672	3.0331	Red
1173	Q9NR71	ASAH2_HUMAN	Neutral ceramidase OS Homo sapiens GN ASAH2 PE 1 SV 2	Regular	38.4284	37.17	86029.2	7	4	40	4.49	9148	3783	4366	0.8863	0.0763	Red
8120	Q9Y6M1	IF2B2_HUMAN	Insulin like growth factor 2 mRNA binding protein 2 OS Homo sapiens GN IGF2BP2 PE 1 SV 2	Regular	38.3194	37.2	66235.6	6	5	47	3.51	9977	8302.5	4943	1.9452	0.1288	Red	2764
13960	Q92729	PTPRU_HUMAN	Receptor type tyrosine protein phosphatase U OS Homo sapiens GN PTPRU PE 1 SV 2	Regular	38.1788	37.4	164363	12	10	89	1.66	51858	5859	10335	1.3727	0.2256	Red
789	Q7Z5J8	ANKAR_HUMAN	Ankyrin and armadillo repeat containing protein OS Homo sapiens GN ANKAR PE 2 SV 3	Regular	38.0608	37.61	163908	20	8	113	0.84	79137	17091	17831	4.0043	0.6563	Red
4960	P54098	DPOG1_HUMAN	DNA polymerase subunit gamma 1 OS Homo sapiens GN POLG PE 1 SV 1	Regular	37.9475	37.69	140703	17	11	94	1.61	44559	16426.5	15106	3.8486	0.5415	Red
19961	Q9H582	ZN644_HUMAN	Zinc finger protein 644 OS Homo sapiens GN ZNF644 PE 1 SV 2	Regular	37.8244	37.83	151447	21	9	106	3.84	63454	13988	17839	3.2773	0.4963	Yellow
18676	O75445	USH2A_HUMAN	Usherin OS Homo sapiens GN USH2A PE 1 SV 3	Regular	37.7795	37.8	586664	40	25	290	1.9	104078	7541	34577	1.7668	1.0365	Red
7573	Q9Y5Z7	HCFC2_HUMAN	Host cell factor 2 OS Homo sapiens GN HCFC2 PE 1 SV 1	Regular	37.6367	37.88	87748.6	4	3	62	4.04	9723	4881	1645	1.1436	0.1003	Red
12388	Q9UBD5	ORC3_HUMAN	Origin recognition complex subunit 3 OS Homo sapiens GN ORC3 PE 1 SV 1	Regular	37.6271	37.84	83337.8	7	4	65	1.97	9248	6147	4802	1.4402	0.12	Red
20024	A6NN14	ZN729_HUMAN	Zinc finger protein 729 OS Homo sapiens GN ZNF729 PE 2 SV 3	Regular	37.5925	37.81	140081	6	3	90	1.28	12094	4575	5095	1.0719	0.1502	Red
5122	Q96JB1	DYH8_HUMAN	Dynein heavy chain 8 axonemal OS Homo sapiens GN DNAH8 PE 1 SV 2	Regular	37.5574	37.77	518315	41	28	367	2.32	124855	38800	33311	9.0906	4.7118	Red	5119
6819	Q8TB36	GDAP1_HUMAN	Ganglioside induced differentiation associated protein 1 OS Homo sapiens GN GDAP1 PE 1 SV 3	Regular	37.4486	37.97	41573.9	10	4	22	6.98	30316	18565	8377	4.3497	0.1808	Red
4910	Q9BZ29	DOCK9_HUMAN	Dedicator of cytokinesis protein 9 OS Homo sapiens GN DOCK9 PE 1 SV 2	Regular	37.4389	37.93	238670	41	22	167	3.91	74650	22267	27352	5.217	1.2451	Red	4898 4899
15595	Q14160	SCRIB_HUMAN	Protein scribble homolog OS Homo sapiens GN SCRIB PE 1 SV 4	Regular	37.3234	37.96	175855	17	11	116	3.62	44432	5167	11315	1.2106	0.2129	Red
3628	Q8WTW3	COG1_HUMAN	Conserved oligomeric Golgi complex subunit 1 OS Homo sapiens GN COG1 PE 1 SV 1	Regular	37.1344	38.1	110176	8	6	75	2.04	23179	13036.5	5584	3.0544	0.3365	Red
2140	Q6TDU7	CASC1_HUMAN	Cancer susceptibility candidate protein 1 OS Homo sapiens GN CASC1 PE 2 SV 2	Regular	37.076	38.06	83787.7	4	3	59	2.51	13073	11688	2642	2.7384	0.2294	Red
2767	Q9UPV0	CE164_HUMAN	Centrosomal protein of 164 kDa OS Homo sapiens GN CEP164 PE 1 SV 3	Regular	37.0627	38.02	164827	19	11	146	2.26	37051	10238	12130	2.3987	0.3954	Red
788	Q12955	ANK3_HUMAN	Ankyrin 3 OS Homo sapiens GN ANK3 PE 1 SV 3	Regular	37.0138	38.05	482692	75	39	361	3.2	232109	63060	57560	14.7746	7.1316	Red	787
14566	Q9P227	RHG23_HUMAN	Rho GTPase activating protein 23 OS Homo sapiens GN ARHGAP23 PE 1 SV 2	Regular	37.0119	38.01	163447	23	11	122	1.68	101987	13810.5	16286	3.2357	0.5289	Red
9019	Q15058	KIF14_HUMAN	Kinesin like protein KIF14 OS Homo sapiens GN KIF14 PE 1 SV 1	Regular	37.0101	37.98	187861	22	8	141	1.94	35121	11945	12424	2.7986	0.5258	Red
15806	Q562F6	SGOL2_HUMAN	Shugoshin like 2 OS Homo sapiens GN SGOL2 PE 1 SV 2	Regular	36.98	38	145880	9	8	138	3	46065	9425	14628	2.2082	0.3221	Yellow
19004	Q8NDM7	WDR96_HUMAN	WD repeat containing protein 96 OS Homo sapiens GN WDR96 PE 2 SV 3	Regular	36.9779	37.96	193809	17	12	155	2.4	38718	10120	14138	2.3711	0.4595	Red
10964	A7E2Y1	MYH7B_HUMAN	Myosin 7B OS Homo sapiens GN MYH7B PE 2 SV 3	Regular	36.8219	37.99	222529	42	18	162	1.75	101830	23361	30263	5.4733	1.218	Red	10962 10961 10966 10956 10960 10959 10965
13299	Q15149	PLEC_HUMAN	Plectin OS Homo sapiens GN PLEC PE 1 SV 3	Regular	36.6969	38.01	533787	68	38	468	3.1	313217	110797	65899	25.959	13.8566	Red
4968	O60673	DPOLZ_HUMAN	DNA polymerase zeta catalytic subunit OS Homo sapiens GN REV3L PE 1 SV 2	Regular	36.6948	37.97	356198	31	27	222	3.29	65074	9278	37525	2.1738	0.7743	Red
4898	Q96BY6	DOC10_HUMAN	Dedicator of cytokinesis protein 10 OS Homo sapiens GN DOCK10 PE 1 SV 3	Regular	36.5903	37.99	251984	28	15	167	2.15	240964	10899	18660	2.5536	0.6435	Yellow	4910 4899
13383	Q96T60	PNKP_HUMAN	Bifunctional polynucleotide phosphatase kinase OS Homo sapiens GN PNKP PE 1 SV 1	Regular	36.5218	38.19	57589.7	4	3	44	1.92	29224	30342	2878	7.1089	0.4094	Red
2821	P49454	CENPF_HUMAN	Centromere protein F OS Homo sapiens GN CENPF PE 1 SV 2	Regular	36.4031	38.26	371073	44	25	346	2.77	142241	29790	40262	6.9796	2.5899	Red
6788	Q8IWJ2	GCC2_HUMAN	GRIP and coiled coil domain containing protein 2 OS Homo sapiens GN GCC2 PE 1 SV 4	Regular	36.3917	38.23	196993	15	13	203	4.16	71564	4363	9045	1.0222	0.2014	Red
12727	Q96QU1	PCD15_HUMAN	Protocadherin 15 OS Homo sapiens GN PCDH15 PE 1 SV 2	Regular	36.2674	38.25	217438	13	9	121	2.97	49430	35339	15565	8.2797	1.8003	Red
10961	P11055	MYH3_HUMAN	Myosin 3 OS Homo sapiens GN MYH3 PE 1 SV 3	Regular	36.2206	38.22	224989	24	15	158	3.09	247652	8851	24326	2.0737	0.4666	Red	10962 10966 10956 10964 10960 10959 10965
1305	Q5T2N8	ATD3C_HUMAN	ATPase family AAA domain containing protein 3C OS Homo sapiens GN ATAD3C PE 1 SV 2	Regular	36.1659	38.24	46664.8	7	6	39	5.84	39327	18831	7188	4.412	0.2059	Red
1019	Q8WZ64	ARAP2_HUMAN	Arf GAP with Rho GAP domain ANK repeat and PH domain containing protein 2 OS Homo sapiens GN ARAP2	Regular	36.0511	38.2	195220	9	6	144	1.82	21771	8390	6131	1.9657	0.3837	Red
10954	P35580	MYH10_HUMAN	Myosin 10 OS Homo sapiens GN MYH10 PE 1 SV 3	Regular	36.0018	38.17	229969	33	21	164	2.13	238653	63870.4	32755	14.9644	3.4414	Red	10955 10957 10967
16605	Q9NY15	STAB1_HUMAN	Stabilin 1 OS Homo sapiens GN STAB1 PE 1 SV 3	Regular	35.9916	38.13	287116	25	13	153	2.72	123147	41172	23500	9.6463	2.7696	Red
4752	Q9NSV4	DIAP3_HUMAN	Protein diaphanous homolog 3 OS Homo sapiens GN DIAPH3 PE 1 SV 4	Regular	35.9747	38.1	138238	14	10	104	1.51	34251	9616.04	6702	2.253	0.3114	Red	10149
16218	Q9Y4B5	SOGA2_HUMAN	Protein SOGA2 OS Homo sapiens GN SOGA2 PE 1 SV 5	Regular	35.8502	38.23	210781	29	18	170	2.89	123396	69840	16634	16.3631	3.449	Red
5117	Q9P225	DYH2_HUMAN	Dynein heavy chain 2 axonemal OS Homo sapiens GN DNAH2 PE 1 SV 3	Regular	35.8399	38.2	511121	56	34	364	1.4	177588	32661	41054	7.6523	3.9112	Red
13958	Q13332	PTPRS_HUMAN	Receptor type tyrosine protein phosphatase S OS Homo sapiens GN PTPRS PE 1 SV 3	Regular	35.8381	38.16	218296	18	11	123	2.36	54059	10768.6	10044	2.523	0.5508	Red	13948 13946
2747	Q6NTE8	CE045_HUMAN	UPF0544 protein C5orf45 OS Homo sapiens GN C5orf45 PE 2 SV 2	Regular	35.8296	38.13	38427.6	2	2	28	4.37	4452	7506	3628	1.7586	0.0676	Red
5368	Q8WYP5	ELYS_HUMAN	Protein ELYS OS Homo sapiens GN AHCTF1 PE 1 SV 3	Regular	35.6995	38.32	254381	20	14	163	2.12	86841	20261	22030	4.747	1.2075	Red
968	P04114	APOB_HUMAN	Apolipoprotein B 100 OS Homo sapiens GN APOB PE 1 SV 2	Regular	35.6295	38.5	516974	42	30	351	1.91	111854	18178	29113	4.259	2.2018	Red
13860	Q16401	PSMD5_HUMAN	26S proteasome non ATPase regulatory subunit 5 OS Homo sapiens GN PSMD5 PE 1 SV 3	Regular	35.6293	38.47	56595	6	5	33	2.58	33513	52263	4884	12.2449	0.693	Red
12954	O60437	PEPL_HUMAN	Periplakin OS Homo sapiens GN PPL PE 1 SV 4	Regular	35.4988	38.65	205317	31	18	197	3.13	82260	20283	27644	4.7522	0.9757	Red
4493	O43237	DC1L2_HUMAN	Cytoplasmic dynein 1 light intermediate chain 2 OS Homo sapiens GN DYNC1LI2 PE 1 SV 1	Regular	35.3878	38.62	54384.5	5	5	47	9.55	30394	13565	6779	3.1782	0.1728	Red
8138	O43432	IF4G3_HUMAN	Eukaryotic translation initiation factor 4 gamma 3 OS Homo sapiens GN EIF4G3 PE 1 SV 2	Regular	35.3534	38.58	177793	20	11	142	2.65	45046	13712	11075	3.2126	0.5712	Red
19780	Q8N895	ZN366_HUMAN	Zinc finger protein 366 OS Homo sapiens GN ZNF366 PE 1 SV 1	Regular	35.1338	38.71	86818.4	3	2	63	1.21	4430	7845	896	1.838	0.1596	Red
7713	O00291	HIP1_HUMAN	Huntingtin interacting protein 1 OS Homo sapiens GN HIP1 PE 1 SV 5	Regular	34.9685	39	117305	11	9	104	3.66	21208	4035	8169	0.9454	0.1109	Red
2920	P13569	CFTR_HUMAN	Cystic fibrosis transmembrane conductance regulator OS Homo sapiens GN CFTR PE 1 SV 3	Regular	34.9684	38.97	169168	13	8	106	2.36	41439	11193	14453	2.6224	0.4436	Red
14491	Q8N1W1	RGNEF_HUMAN	Rho guanine nucleotide exchange factor OS Homo sapiens GN RGNEF PE 1 SV 3	Regular	34.836	39.09	194001	14	12	129	1.94	65437	14401	24294	3.3741	0.6546	Red
11189	O14513	NCKP5_HUMAN	Nck associated protein 5 OS Homo sapiens GN NCKAP5 PE 2 SV 2	Regular	34.6904	39.27	210362	14	12	149	0.63	30169	4923	14115	1.1534	0.2426	Red
18550	O95071	UBR5_HUMAN	E3 ubiquitin protein ligase UBR5 OS Homo sapiens GN UBR5 PE 1 SV 2	Regular	34.5947	39.34	312546	19	15	205	3.25	101095	41032	30236	9.6135	3.0047	Red
9749	P50851	LRBA_HUMAN	Lipopolysaccharide responsive and beige like anchor protein OS Homo sapiens GN LRBA PE 1 SV 4	Regular	34.5685	39.36	321789	18	12	205	1.99	91072	16323	16084	3.8244	1.2306	Red
19370	Q56UN5	YSK4_HUMAN	SPS1 STE20 related protein kinase YSK4 OS Homo sapiens GN YSK4 PE 1 SV 1	Regular	34.3882	39.48	152077	7	6	123	3.24	39900	10232	7619	2.3973	0.3646	Red
4777	O75165	DJC13_HUMAN	DnaJ homolog subfamily C member 13 OS Homo sapiens GN DNAJC13 PE 1 SV 5	Regular	34.3834	39.45	256696	24	13	179	1.87	186737	30421	23273	7.1274	1.8296	Red
14957	Q9Y4G8	RPGF2_HUMAN	Rap guanine nucleotide exchange factor 2 OS Homo sapiens GN RAPGEF2 PE 1 SV 1	Regular	34.3427	39.52	168273	15	9	115	0.8	38691	10086	10892	2.3631	0.3976	Red
9127	Q96PQ7	KLHL5_HUMAN	Kelch like protein 5 OS Homo sapiens GN KLHL5 PE 2 SV 3	Regular	34.3068	39.48	85826.1	8	4	57	1.06	28531	35856	6932	8.4008	0.721	Red	9126
8583	Q14571	ITPR2_HUMAN	Inositol 1 4 5 trisphosphate receptor type 2 OS Homo sapiens GN ITPR2 PE 1 SV 2	Regular	34.1132	39.66	311258	30	17	217	1.67	78879	7765.88	19444	1.8195	0.5663	Red	8584 8582
6595	Q9Y2I7	FYV1_HUMAN	1 phosphatidylinositol 3 phosphate 5 kinase OS Homo sapiens GN PIKFYVE PE 1 SV 3	Regular	33.887	39.68	239760	26	16	176	3.19	356572	31425	65435	7.3627	1.7653	Red
11704	Q9P2S2	NRX2A_HUMAN	Neurexin 2 alpha OS Homo sapiens GN NRXN2 PE 2 SV 1	Regular	33.8852	39.64	187092	19	9	113	1.64	38949	14953.5	17268	3.5035	0.6555	Red
15886	O43166	SI1L1_HUMAN	Signal induced proliferation associated 1 like protein 1 OS Homo sapiens GN SIPA1L1 PE 1 SV 4	Regular	33.7172	39.76	201226	25	13	144	3.16	97326	15739	23644	3.6875	0.742	Red
7672	A2PYH4	HFM1_HUMAN	Probable ATP dependent DNA helicase HFM1 OS Homo sapiens GN HFM1 PE 1 SV 2	Regular	33.6178	39.78	163808	23	13	129	1.39	112768	47874	19054	11.2166	1.8374	Red
9831	Q07954	LRP1_HUMAN	Prolow density lipoprotein receptor related protein 1 OS Homo sapiens GN LRP1 PE 1 SV 2	Regular	33.6084	39.8	523483	35	22	301	2.13	77750	18091	22977	4.2386	2.2188	Red
18792	Q6PFW1	VIP1_HUMAN	Inositol hexakisphosphate and diphosphoinositol pentakisphosphate kinase 1 OS Homo sapiens GN PPIP5K	Regular	33.5372	39.97	161346	11	5	88	0.7	27647	31422	5276	7.362	1.1878	Red
1174	Q9ULH1	ASAP1_HUMAN	Arf GAP with SH3 domain ANK repeat and PH domain containing protein 1 OS Homo sapiens GN ASAP1 PE 1	Regular	33.5306	39.93	126468	14	8	80	3.72	89601	8156	11655	1.9109	0.2417	Red
18992	Q562E7	WDR81_HUMAN	WD repeat containing protein 81 OS Homo sapiens GN WDR81 PE 1 SV 2	Regular	33.4556	40	213522	18	9	121	0.98	54765	14337	10344	3.3591	0.7172	Red
18142	Q9Y4A5	TRRAP_HUMAN	Transformation transcription domain associated protein OS Homo sapiens GN TRRAP PE 1 SV 3	Regular	33.2863	40.12	442049	32	20	318	3.14	66620	20039	31156	4.695	2.0754	Red
690	Q8TCU4	ALMS1_HUMAN	Alstrom syndrome protein 1 OS Homo sapiens GN ALMS1 PE 1 SV 3	Regular	33.283	40.08	463360	43	33	329	3.17	205906	45725	61804	10.7131	4.964	Red
15459	P07602	SAP_HUMAN	Proactivator polypeptide OS Homo sapiens GN PSAP PE 1 SV 2	Regular	33.1256	40.2	59937.6	2	4	47	7.06	14266	12529	1448	2.9355	0.1759	Red
11520	Q8NC60	NOA1_HUMAN	Nitric oxide associated protein 1 OS Homo sapiens GN NOA1 PE 1 SV 2	Regular	33.1231	40.17	79028.2	11	6	65	4.58	41655	18195	7358	4.263	0.3369	Red	23671
3015	Q3L8U1	CHD9_HUMAN	Chromodomain helicase DNA binding protein 9 OS Homo sapiens GN CHD9 PE 1 SV 2	Regular	32.9229	40.23	328189	31	17	189	1	72941	23900	30197	5.5996	1.8377	Red	3014
1555	O75815	BCAR3_HUMAN	Breast cancer anti estrogen resistance protein 3 OS Homo sapiens GN BCAR3 PE 1 SV 1	Regular	32.8934	40.2	93535.2	6	5	67	5.7	9881	3735	4873	0.8751	0.0819	Red
9069	Q6P597	KLC3_HUMAN	Kinesin light chain 3 OS Homo sapiens GN KLC3 PE 1 SV 2	Regular	32.8009	40.46	55592.4	11	4	48	5.16	14182	7219.5	7034	1.6915	0.094	Red
4600	Q9NQI0	DDX4_HUMAN	Probable ATP dependent RNA helicase DDX4 OS Homo sapiens GN DDX4 PE 2 SV 2	Regular	32.7874	40.43	80163.1	11	6	70	2.49	55277	12741	12924	2.9851	0.2393	Red
12889	Q15120	PDK3_HUMAN	Pyruvate dehydrogenase lipoamide kinase isozyme 3 mitochondrial OS Homo sapiens GN PDK3 PE 1 SV	Regular	32.6785	40.49	47110.1	7	3	32	10.84	4801	4801	6480	1.1248	0.053	Red
18114	O15050	TRNK1_HUMAN	TPR and ankyrin repeat containing protein 1 OS Homo sapiens GN TRANK1 PE 2 SV 4	Regular	32.5906	40.46	340556	32	17	256	1.85	116667	38143	18809	8.9367	3.0434	Red	12386
18514	Q8NFA0	UBP32_HUMAN	Ubiquitin carboxyl terminal hydrolase 32 OS Homo sapiens GN USP32 PE 1 SV 1	Regular	32.5079	40.57	183937	12	6	121	0.31	21026	4203	6000	0.9847	0.1811	Red
5023	O60469	DSCAM_HUMAN	Down syndrome cell adhesion molecule OS Homo sapiens GN DSCAM PE 1 SV 2	Regular	32.466	40.59	224028	16	10	146	3.23	40727	14830	16726	3.4746	0.7784	Red
5148	Q86Y13	DZIP3_HUMAN	E3 ubiquitin protein ligase DZIP3 OS Homo sapiens GN DZIP3 PE 1 SV 2	Regular	32.4116	40.6	140144	10	6	115	1.66	41491	39552	19433	9.2668	1.2987	Red
17176	Q9UGU0	TCF20_HUMAN	Transcription factor 20 OS Homo sapiens GN TCF20 PE 1 SV 3	Regular	32.3073	40.62	213254	22	11	140	2.91	213236	20107	20589	4.7109	1.0046	Red
16121	Q8TER0	SNED1_HUMAN	Sushi nidogen and EGF like domain containing protein 1 OS Homo sapiens GN SNED1 PE 1 SV 2	Regular	32.1955	40.64	158306	6	5	90	3.47	14628	7503	5379	1.7579	0.2783	Red
12962	P05164	PERM_HUMAN	Myeloperoxidase OS Homo sapiens GN MPO PE 1 SV 1	Regular	31.8333	40.75	84838.2	15	10	62	2.82	50166	7734	22015	1.812	0.1537	Red
18692	O75691	UTP20_HUMAN	Small subunit processome component 20 homolog OS Homo sapiens GN UTP20 PE 1 SV 3	Regular	31.7333	40.81	321009	29	17	208	2.59	113880	24685	27493	5.7835	1.8566	Red
16625	Q9P2P6	STAR9_HUMAN	StAR related lipid transfer protein 9 OS Homo sapiens GN STARD9 PE 1 SV 3	Regular	31.7033	40.87	522161	30	20	377	1.74	115702	24934	15747	5.8419	3.0504	Red	17016
4525	P19113	DCHS_HUMAN	Histidine decarboxylase OS Homo sapiens GN HDC PE 2 SV 2	Regular	31.6947	40.84	75224.2	7	3	54	1.96	11375	10804.5	2410	2.5314	0.1904	Red
1507	Q9P281	BAHC1_HUMAN	BAH and coiled coil domain containing protein 1 OS Homo sapiens GN BAHCC1 PE 1 SV 3	Regular	31.665	40.81	279726	32	17	169	0.31	109874	4587	21563	1.0747	0.3006	Red
13080	Q86SQ0	PHLB2_HUMAN	Pleckstrin homology like domain family B member 2 OS Homo sapiens GN PHLDB2 PE 1 SV 2	Regular	31.5532	40.96	142900	10	6	114	1.92	38806	14956.5	5241	3.5042	0.5008	Red
4956	Q07864	DPOE1_HUMAN	DNA polymerase epsilon catalytic subunit A OS Homo sapiens GN POLE PE 1 SV 5	Regular	31.5439	40.93	264199	21	13	169	1.62	65884	11958	11171	2.8017	0.7402	Red
10937	O75592	MYCB2_HUMAN	Probable E3 ubiquitin protein ligase MYCBP2 OS Homo sapiens GN MYCBP2 PE 1 SV 3	Regular	31.4913	40.95	518183	38	22	330	2.09	66824	13780	29073	3.2286	1.673	Red
569	Q8N157	AHI1_HUMAN	Jouberin OS Homo sapiens GN AHI1 PE 1 SV 1	Regular	31.4231	40.96	138256	16	7	104	2.76	29706	19480.5	9783	4.5642	0.631	Red
11692	Q7Z2Y5	NRK_HUMAN	Nik related protein kinase OS Homo sapiens GN NRK PE 2 SV 2	Regular	31.3445	40.97	179620	13	7	120	0.57	51479	59811	9993	14.0133	2.5171	Red
9161	P50748	KNTC1_HUMAN	Kinetochore associated protein 1 OS Homo sapiens GN KNTC1 PE 1 SV 1	Regular	31.3408	40.94	253372	19	12	173	2.76	84451	18583	21279	4.3539	1.1032	Red
15562	Q9UQR0	SCML2_HUMAN	Sex comb on midleg like protein 2 OS Homo sapiens GN SCML2 PE 1 SV 1	Regular	31.1976	41.1	78112.3	5	5	63	7	21219	6455	4365	1.5124	0.1181	Red
5021	Q02487	DSC2_HUMAN	Desmocollin 2 OS Homo sapiens GN DSC2 PE 1 SV 1	Regular	31.1501	41.06	101387	12	6	62	4.11	37033	15042	9290	3.5242	0.3573	Red
19080	O00308	WWP2_HUMAN	NEDD4 like E3 ubiquitin protein ligase WWP2 OS Homo sapiens GN WWP2 PE 1 SV 2	Regular	31.0894	41.08	99482.5	10	5	68	3.79	9824	3913.5	5046	0.9169	0.0912	Red
13350	O43157	PLXB1_HUMAN	Plexin B1 OS Homo sapiens GN PLXNB1 PE 1 SV 3	Regular	31.0574	41.05	235549	16	10	120	2.95	40743	12997	12714	3.0451	0.7173	Red
12435	Q9HC10	OTOF_HUMAN	Otoferlin OS Homo sapiens GN OTOF PE 1 SV 3	Regular	31.0537	41.01	228350	20	14	149	2.55	45784	4548	29339	1.0656	0.2433	Red
1734	P51587	BRCA2_HUMAN	Breast cancer type 2 susceptibility protein OS Homo sapiens GN BRCA2 PE 1 SV 2	Regular	31.0498	40.98	388560	34	15	290	2.87	89035	31860	27882	7.4646	2.9004	Red
10774	O15457	MSH4_HUMAN	MutS protein homolog 4 OS Homo sapiens GN MSH4 PE 2 SV 2	Regular	30.9771	41.04	105839	11	6	67	2.03	18570	6903	5769	1.6173	0.1712	Red
4597	Q7L014	DDX46_HUMAN	Probable ATP dependent RNA helicase DDX46 OS Homo sapiens GN DDX46 PE 1 SV 2	Regular	30.9497	41.01	117876	18	10	98	1.07	89297	2460	11217	0.5764	0.0679	Red
16446	Q9H254	SPTN4_HUMAN	Spectrin beta chain non erythrocytic 4 OS Homo sapiens GN SPTBN4 PE 1 SV 2	Regular	30.9466	40.98	290183	22	12	245	3.2	47829	11939	15398	2.7972	0.8117	Red
18900	Q502W6	VWA3B_HUMAN	von Willebrand factor A domain containing protein 3B OS Homo sapiens GN VWA3B PE 2 SV 3	Regular	30.8888	40.94	147117	14	8	117	4.56	38876	15750	14423	3.6901	0.5429	Red
17222	Q587J7	TDR12_HUMAN	Tudor domain containing protein 12 OS Homo sapiens GN TDRD12 PE 2 SV 2	Regular	30.8672	40.91	134802	15	9	90	4.67	33385	7464	8055	1.7488	0.2357	Red
10151	P11137	MAP2_HUMAN	Microtubule associated protein 2 OS Homo sapiens GN MAP2 PE 1 SV 4	Regular	30.8164	40.88	199983	11	12	186	1.92	48443	11050.5	9693	2.5891	0.5178	Red
17019	Q15542	TAF5_HUMAN	Transcription initiation factor TFIID subunit 5 OS Homo sapiens GN TAF5 PE 1 SV 3	Regular	30.6925	40.89	87343.6	5	5	55	2.13	26193	18132	8980	4.2482	0.3711	Red
3841	Q10570	CPSF1_HUMAN	Cleavage and polyadenylation specificity factor subunit 1 OS Homo sapiens GN CPSF1 PE 1 SV 2	Regular	30.685	40.86	162139	4	6	109	0.55	21249	21060	3283	4.9342	0.8	Red
9994	Q99698	LYST_HUMAN	Lysosomal trafficking regulator OS Homo sapiens GN LYST PE 1 SV 3	Regular	30.6826	40.83	434443	16	14	273	3.13	52526	23082	11571	5.408	2.3495	Red
4829	P11532	DMD_HUMAN	Dystrophin OS Homo sapiens GN DMD PE 1 SV 3	Regular	30.6765	40.8	428803	46	32	318	2.42	110900	17698	35408	4.1465	1.778	Red	18695
11322	Q99435	NELL2_HUMAN	Protein kinase C binding protein NELL2 OS Homo sapiens GN NELL2 PE 1 SV 1	Regular	30.615	40.81	96421.9	8	3	50	4.78	9460	8044	3832	1.8847	0.1817	Red
6475	A9Z1Z3	FR1L4_HUMAN	Fer 1 like protein 4 OS Homo sapiens GN FER1L4 PE 2 SV 1	Regular	30.596	40.78	202292	5	5	114	1.51	24724	13665	3025	3.2016	0.6477	Red
6779	O00591	GBRP_HUMAN	Gamma aminobutyric acid receptor subunit pi OS Homo sapiens GN GABRP PE 1 SV 1	Regular	30.4196	40.75	51039.5	7	3	30	5.91	7419	8335.5	4303	1.953	0.0997	Red
5115	Q9UFH2	DYH17_HUMAN	Dynein heavy chain 17 axonemal OS Homo sapiens GN DNAH17 PE 2 SV 2	Regular	30.3586	40.72	515609	56	32	374	1.78	207969	15021	40962	3.5193	1.8146	Red	5112 5123
16883	Q5T011	SZT2_HUMAN	Protein SZT2 OS Homo sapiens GN SZT2 PE 2 SV 3	Regular	30.341	40.82	382021	24	10	216	0.93	57945	8061	11453	1.8886	0.7215	Red
8552	P20702	ITAX_HUMAN	Integrin alpha X OS Homo sapiens GN ITGAX PE 1 SV 3	Regular	30.2899	40.88	129027	6	5	73	1.46	18228	5082	6553	1.1907	0.1536	Red
19093	A4UGR9	XIRP2_HUMAN	Xin actin binding repeat containing protein 2 OS Homo sapiens GN XIRP2 PE 1 SV 2	Regular	30.1878	40.94	384125	44	27	302	3.08	183523	13818	27261	3.2375	1.2436	Red	38504
706	Q5JTC6	AMER1_HUMAN	APC membrane recruitment protein 1 OS Homo sapiens GN FAM123B PE 1 SV 2	Regular	30.1308	40.96	125170	9	4	97	0.7	21733	49365	7721	11.5659	1.4477	Red
17285	Q6N021	TET2_HUMAN	Methylcytosine dioxygenase TET2 OS Homo sapiens GN TET2 PE 1 SV 3	Regular	30.125	40.93	226378	15	9	146	2.15	25097	5621	6788	1.317	0.2981	Red	17286
10500	Q96T58	MINT_HUMAN	Msx2 interacting protein OS Homo sapiens GN SPEN PE 1 SV 1	Regular	30.0833	40.94	403275	26	19	286	1.83	102223	27958	20481	6.5504	2.6416	Red
3597	Q02388	CO7A1_HUMAN	Collagen alpha 1 VII chain OS Homo sapiens GN COL7A1 PE 1 SV 2	Regular	30.0145	41	296189	30	13	194	1.46	103992	10276	20353	2.4076	0.7131	Red
16063	O60264	SMCA5_HUMAN	SWI SNF related matrix associated actin dependent regulator of chromatin subfamily A member 5 OS Hom	Regular	29.9994	41.01	122590	8	7	94	1.71	75790	14914.5	6118	3.4944	0.4284	Red
2580	Q5M9N0	CD158_HUMAN	Coiled coil domain containing protein 158 OS Homo sapiens GN CCDC158 PE 2 SV 2	Regular	29.9985	40.98	127654	5	6	116	1.08	29581	4641	6381	1.0874	0.1388	Red
5112	Q96DT5	DYH11_HUMAN	Dynein heavy chain 11 axonemal OS Homo sapiens GN DNAH11 PE 1 SV 3	Regular	29.9739	40.95	525207	49	34	354	3.16	164897	11493	36418	2.6927	1.4142	Red	5123 5115
8985	Q9H1H9	KI13A_HUMAN	Kinesin like protein KIF13A OS Homo sapiens GN KIF13A PE 1 SV 2	Regular	29.8855	41.06	203963	12	9	150	1.5	43329	9699	15698	2.2724	0.4635	Red
5902	Q5VVP1	F75A6_HUMAN	Protein FAM75A6 OS Homo sapiens GN FAM75A6 PE 1 SV 1	Regular	29.8852	41.02	149529	7	4	94	0.97	16673	23475	2714	5.5	0.8224	Red	11002 29164
17295	Q8N6G2	TEX26_HUMAN	Testis expressed sequence 26 protein OS Homo sapiens GN TEX26 PE 2 SV 1	Regular	29.8005	41.08	33880.3	7	3	25	5.19	71921	54652.5	7365	12.8047	0.4338	Red
16628	P52630	STAT2_HUMAN	Signal transducer and activator of transcription 2 OS Homo sapiens GN STAT2 PE 1 SV 1	Regular	29.7564	41.14	98657.7	4	3	58	1.29	9885	11946	3178	2.7989	0.2761	Red
19604	Q68DK2	ZFY26_HUMAN	Zinc finger FYVE domain containing protein 26 OS Homo sapiens GN ZFYVE26 PE 1 SV 3	Regular	29.705	41.11	289310	26	13	211	2.6	40893	21897	16082	5.1303	1.4843	Red
2771	Q5VT06	CE350_HUMAN	Centrosome associated protein 350 OS Homo sapiens GN CEP350 PE 1 SV 1	Regular	29.68	41.08	352527	31	20	278	1.03	93601	32516	20772	7.6183	2.6857	Red
9846	Q6ZRR7	LRRC9_HUMAN	Leucine rich repeat containing protein 9 OS Homo sapiens GN LRRC9 PE 2 SV 2	Regular	29.6279	41.09	168907	15	10	111	0.62	57913	24294	10748	5.6919	0.9614	Red
15575	Q15858	SCN9A_HUMAN	Sodium channel protein type 9 subunit alpha OS Homo sapiens GN SCN9A PE 1 SV 3	Regular	29.6182	41.06	228483	21	10	127	2.62	106644	70444	19525	16.5046	3.771	Red	15566
8585	Q15811	ITSN1_HUMAN	Intersectin 1 OS Homo sapiens GN ITSN1 PE 1 SV 3	Regular	29.603	41.12	196277	20	12	120	1.34	84705	12562.5	24900	2.9433	0.5777	Red
10182	P48740	MASP1_HUMAN	Mannan binding lectin serine protease 1 OS Homo sapiens GN MASP1 PE 1 SV 3	Regular	29.4677	41.31	80900.6	5	3	56	3.43	10925	8436	5662	1.9765	0.1599	Red
3573	P02452	CO1A1_HUMAN	Collagen alpha 1 I chain OS Homo sapiens GN COL1A1 PE 1 SV 5	Regular	29.4498	41.28	139968	12	7	93	2.25	37490	9718	6111	2.2769	0.3187	Red
13083	O60346	PHLP1_HUMAN	PH domain leucine rich repeat containing protein phosphatase 1 OS Homo sapiens GN PHLPP1 PE 1 SV 3	Regular	29.3949	41.25	187068	11	8	114	2.56	25869	9839	11541	2.3052	0.4312	Red
12466	Q6IE36	OVOS2_HUMAN	Ovostatin homolog 2 OS Homo sapiens GN OVOS2 PE 2 SV 2	Regular	29.3611	41.26	162619	19	8	92	2.86	58961	17660	16772	4.1376	0.6729	Red	2372
1232	Q8IZT6	ASPM_HUMAN	Abnormal spindle like microcephaly associated protein OS Homo sapiens GN ASPM PE 1 SV 2	Regular	29.2713	41.32	413451	45	28	265	1.98	252664	44087	52369	10.3293	4.2707	Red
15484	A3KN83	SBNO1_HUMAN	Protein strawberry notch homolog 1 OS Homo sapiens GN SBNO1 PE 1 SV 1	Regular	29.154	41.46	154997	16	8	100	1.01	26083	3726	11427	0.873	0.1353	Red
15870	Q149N8	SHPRH_HUMAN	E3 ubiquitin protein ligase SHPRH OS Homo sapiens GN SHPRH PE 1 SV 2	Regular	29.1061	41.47	195703	17	13	130	3.57	69962	6008	18331	1.4076	0.2755	Red
8114	Q16666	IF16_HUMAN	Gamma interferon inducible protein 16 OS Homo sapiens GN IFI16 PE 1 SV 3	Regular	29.025	41.53	88712	7	4	60	2.93	11562	8027	6666	1.8807	0.1668	Red
8064	Q8WUF5	IASPP_HUMAN	RelA associated inhibitor OS Homo sapiens GN PPP1R13L PE 1 SV 4	Regular	28.992	41.54	89433.4	9	3	56	3.38	35905	25830	8153	6.0518	0.5412	Red
1260	P05023	AT1A1_HUMAN	Sodium potassium transporting ATPase subunit alpha 1 OS Homo sapiens GN ATP1A1 PE 1 SV 1	Regular	28.9677	41.56	114208	10	5	71	4.69	34406	30747	8023	7.2038	0.8227	Red
7358	A4D1B5	GSAP_HUMAN	Gamma secretase activating protein OS Homo sapiens GN PION PE 1 SV 2	Regular	28.9529	41.57	99056.3	10	6	55	3.63	16177	5509.5	8222	1.2908	0.1279	Red
8866	P22459	KCNA4_HUMAN	Potassium voltage gated channel subfamily A member 4 OS Homo sapiens GN KCNA4 PE 1 SV 2	Regular	28.9384	41.54	74112.8	3	2	43	1.38	12409	23889	4727	5.597	0.4148	Red
8990	O95235	KI20A_HUMAN	Kinesin like protein KIF20A OS Homo sapiens GN KIF20A PE 1 SV 1	Regular	28.9118	41.55	101305	7	5	78	2.13	40527	26484	5245	6.205	0.6286	Red
11497	Q13224	NMDE2_HUMAN	Glutamate NMDA receptor subunit epsilon 2 OS Homo sapiens GN GRIN2B PE 1 SV 3	Regular	28.8537	41.52	168078	10	6	108	1.68	27066	10929	7655	2.5606	0.4304	Red
233	Q09428	ABCC8_HUMAN	ATP binding cassette sub family C member 8 OS Homo sapiens GN ABCC8 PE 1 SV 6	Regular	28.7857	41.53	178589	11	8	103	2.28	64417	43753	10207	10.2511	1.8307	Red
1762	Q6RI45	BRWD3_HUMAN	Bromodomain and WD repeat containing protein 3 OS Homo sapiens GN BRWD3 PE 1 SV 2	Regular	28.7236	41.5	205366	25	12	129	1.17	73762	19647	19666	4.6032	0.9453	Red
13837	Q9BQI7	PSD2_HUMAN	PH and SEC7 domain containing protein 2 OS Homo sapiens GN PSD2 PE 2 SV 3	Regular	28.7118	41.47	85344.8	12	6	65	3.11	14252	4810.5	7010	1.1271	0.0962	Red
5120	Q9C0G6	DYH6_HUMAN	Dynein heavy chain 6 axonemal OS Homo sapiens GN DNAH6 PE 1 SV 3	Regular	28.6953	41.48	479975	35	25	314	1.92	79017	15465	26433	3.6234	1.7391	Red
14883	Q9BQ52	RNZ2_HUMAN	Zinc phosphodiesterase ELAC protein 2 OS Homo sapiens GN ELAC2 PE 1 SV 2	Regular	28.6859	41.45	93473.8	13	8	67	6.17	14550	6796	7125	1.5923	0.1488	Red
8548	P38570	ITAE_HUMAN	Integrin alpha E OS Homo sapiens GN ITGAE PE 1 SV 3	Regular	28.6743	41.42	131642	9	7	81	1.95	28626	12586.5	10142	2.9489	0.3882	Red
5116	Q9P2D7	DYH1_HUMAN	Dynein heavy chain 1 axonemal OS Homo sapiens GN DNAH1 PE 1 SV 4	Regular	28.5727	41.48	498003	34	22	323	1.15	128387	17158.7	18548	4.0202	2.0021	Red	5118
18536	Q70EL1	UBP54_HUMAN	Inactive ubiquitin carboxyl terminal hydrolase 54 OS Homo sapiens GN USP54 PE 1 SV 4	Regular	28.571	41.45	189727	14	7	132	0.59	32724	13347	6726	3.1271	0.5933	Red
16800	Q9HCS7	SYF1_HUMAN	Pre mRNA splicing factor SYF1 OS Homo sapiens GN XAB2 PE 1 SV 2	Regular	28.5011	41.55	100808	12	6	66	3.27	24191	7843.5	9170	1.8377	0.1853	Red
5124	Q14204	DYHC1_HUMAN	Cytoplasmic dynein 1 heavy chain 1 OS Homo sapiens GN DYNC1H1 PE 1 SV 5	Regular	28.46	41.6	535146	41	30	379	2.22	119328	16998	32870	3.9825	2.1312	Red
12652	Q53GL7	PAR10_HUMAN	Poly ADP ribose polymerase 10 OS Homo sapiens GN PARP10 PE 1 SV 2	Regular	28.335	41.61	110968	9	6	62	1.76	24540	4767	4862	1.1169	0.1239	Red
948	P25054	APC_HUMAN	Adenomatous polyposis coli protein OS Homo sapiens GN APC PE 1 SV 2	Regular	28.2407	41.67	313813	32	22	233	3.31	74763	11939	21620	2.7972	0.8778	Red	942
19832	Q96JG9	ZN469_HUMAN	Zinc finger protein 469 OS Homo sapiens GN ZNF469 PE 1 SV 3	Regular	28.2068	41.72	414422	24	16	252	2.32	80215	14785	19120	3.464	1.4356	Red
6514	Q5TBA9	FRY_HUMAN	Protein furry homolog OS Homo sapiens GN FRY PE 1 SV 1	Regular	28.1632	41.73	342297	21	16	217	2.09	71106	20588	23863	4.8236	1.6511	Red
13927	Q16825	PTN21_HUMAN	Tyrosine protein phosphatase non receptor type 21 OS Homo sapiens GN PTPN21 PE 1 SV 2	Regular	28.1543	41.7	134194	6	4	81	1.79	8877	6070.5	2168	1.4223	0.1909	Red
6138	P35556	FBN2_HUMAN	Fibrillin 2 OS Homo sapiens GN FBN2 PE 1 SV 3	Regular	27.9736	41.76	335476	14	10	171	0.52	21256	10296	6468	2.4123	0.8093	Red
6120	Q9NYQ8	FAT2_HUMAN	Protocadherin Fat 2 OS Homo sapiens GN FAT2 PE 1 SV 2	Regular	27.9701	41.73	482397	41	22	276	1.7	64761	17456	22209	4.0898	1.9729	Red
14825	Q5W0B1	RN219_HUMAN	RING finger protein 219 OS Homo sapiens GN RNF219 PE 1 SV 1	Regular	27.6627	41.95	82428.2	5	4	63	4.41	11098	6660	3552	1.5604	0.1286	Red
6630	Q99501	GA2L1_HUMAN	GAS2 like protein 1 OS Homo sapiens GN GAS2L1 PE 1 SV 2	Regular	27.652	41.92	73401.1	6	3	62	1.32	18045	4791	4084	1.1225	0.0824	Red
17272	P22105	TENX_HUMAN	Tenascin X OS Homo sapiens GN TNXB PE 1 SV 3	Regular	27.6297	41.89	471340	32	20	325	2.38	156727	71743	21820	16.8089	7.9227	Red
19874	Q9HCE3	ZN532_HUMAN	Zinc finger protein 532 OS Homo sapiens GN ZNF532 PE 1 SV 2	Regular	27.588	41.86	144091	12	6	110	1.69	53087	3664.5	10030	0.8586	0.1237	Red
6563	Q4VC44	FWCH1_HUMAN	FLYWCH type zinc finger containing protein 1 OS Homo sapiens GN FLYWCH1 PE 1 SV 2	Regular	27.5818	41.83	81306.1	6	4	52	2.93	41952	10290	5246	2.4109	0.196	Red
18918	Q2M389	WASH7_HUMAN	WASH complex subunit 7 OS Homo sapiens GN KIAA1033 PE 1 SV 2	Regular	27.3025	42.05	137430	18	11	100	1.62	44189	18304.5	8064	4.2886	0.5894	Red
4908	Q96N67	DOCK7_HUMAN	Dedicator of cytokinesis protein 7 OS Homo sapiens GN DOCK7 PE 1 SV 4	Regular	27.0235	42.18	244443	28	17	159	1.54	189209	8566	23783	2.007	0.4906	Red
16543	P28290	SSFA2_HUMAN	Sperm specific antigen 2 OS Homo sapiens GN SSFA2 PE 1 SV 3	Regular	26.9601	42.15	139641	8	8	95	1.11	24816	12843	4748	3.009	0.4202	Red
7321	Q7Z2K8	GRIN1_HUMAN	G protein regulated inducer of neurite outgrowth 1 OS Homo sapiens GN GPRIN1 PE 1 SV 2	Regular	26.8875	42.16	103198	18	12	113	1.49	45361	4573.5	13045	1.0715	0.1106	Red
17932	P29144	TPP2_HUMAN	Tripeptidyl peptidase 2 OS Homo sapiens GN TPP2 PE 1 SV 4	Regular	26.8446	42.13	139833	15	6	114	1.12	20868	16317	10451	3.823	0.5346	Red
2452	Q9NVE4	CCD87_HUMAN	Coiled coil domain containing protein 87 OS Homo sapiens GN CCDC87 PE 2 SV 2	Regular	26.8287	42.14	96801.5	12	5	72	2.83	610159	13746	65156	3.2206	0.3118	Red
13682	Q92954	PRG4_HUMAN	Proteoglycan 4 OS Homo sapiens GN PRG4 PE 1 SV 2	Regular	26.8112	42.11	152332	17	14	229	3.21	99356	12153	16547	2.8474	0.4337	Red
9126	Q9C0H6	KLHL4_HUMAN	Kelch like protein 4 OS Homo sapiens GN KLHL4 PE 2 SV 2	Regular	26.781	42.12	81158.1	8	4	54	1.39	12446	4578	4654	1.0726	0.087	Red	9127
10957	Q7Z406	MYH14_HUMAN	Myosin 14 OS Homo sapiens GN MYH14 PE 1 SV 2	Regular	26.7661	42.09	228840	28	16	171	4.21	104943	13518	20238	3.1672	0.7248	Red	10955 10954 10967
17869	Q96HA7	TONSL_HUMAN	Tonsoku like protein OS Homo sapiens GN TONSL PE 1 SV 2	Regular	26.746	42.11	153096	10	7	97	4.21	61399	24423	5649	5.7222	0.876	Red
13922	Q12923	PTN13_HUMAN	Tyrosine protein phosphatase non receptor type 13 OS Homo sapiens GN PTPN13 PE 1 SV 2	Regular	26.683	42.08	279016	21	11	192	1.33	74709	10386	17451	2.4334	0.6789	Red
9110	Q8NBE8	KLH23_HUMAN	Kelch like protein 23 OS Homo sapiens GN KLHL23 PE 2 SV 1	Regular	26.6291	42.09	65120.9	8	6	46	1.97	13269	6510	4808	1.5253	0.0993	Red
9410	O15230	LAMA5_HUMAN	Laminin subunit alpha 5 OS Homo sapiens GN LAMA5 PE 1 SV 8	Regular	26.4461	42.26	412284	23	12	235	0.87	58781	26725.5	21246	6.2616	2.5816	Red
10996	Q9Y4I1	MYO5A_HUMAN	Unconventional myosin Va OS Homo sapiens GN MYO5A PE 1 SV 2	Regular	26.4452	42.23	217116	22	15	161	2.91	41868	13692	16596	3.2079	0.6965	Red
18127	O94759	TRPM2_HUMAN	Transient receptor potential cation channel subfamily M member 2 OS Homo sapiens GN TRPM2 PE 1 SV 2	Regular	26.4066	42.2	172852	12	8	124	4.06	30502	21198	5948	4.9666	0.8585	Red
2812	Q9NYQ7	CELR3_HUMAN	Cadherin EGF LAG seven pass G type receptor 3 OS Homo sapiens GN CELSR3 PE 1 SV 2	Regular	26.2896	42.29	363090	35	17	226	0.82	97277	15870.5	37032	3.7184	1.3501	Red	7169 12728
867	Q92625	ANS1A_HUMAN	Ankyrin repeat and SAM domain containing protein 1A OS Homo sapiens GN ANKS1A PE 1 SV 4	Regular	26.2726	42.26	124078	7	5	82	1.23	34347	8895	2859	2.084	0.2586	Red
4803	O14490	DLGP1_HUMAN	Disks large associated protein 1 OS Homo sapiens GN DLGAP1 PE 1 SV 1	Regular	26.254	42.23	110185	6	5	67	2.66	51297	63049.5	8654	14.7721	1.6277	Red
14540	Q9BYZ6	RHBT2_HUMAN	Rho related BTB domain containing protein 2 OS Homo sapiens GN RHOBTB2 PE 2 SV 2	Regular	26.2219	42.24	83653	5	4	53	3.03	56592	3495	1758	0.8189	0.0685	Red
7647	O95714	HERC2_HUMAN	E3 ubiquitin protein ligase HERC2 OS Homo sapiens GN HERC2 PE 1 SV 2	Regular	26.0579	42.25	533844	35	20	337	2.34	81271	10424	19914	2.4423	1.3038	Red
3687	P31146	COR1A_HUMAN	Coronin 1A OS Homo sapiens GN CORO1A PE 1 SV 4	Regular	25.9924	42.27	51710.7	5	3	36	2.17	8044	10074	3220	2.3603	0.1221	Red
15631	Q5TEA6	SE1L2_HUMAN	Protein sel 1 homolog 2 OS Homo sapiens GN SEL1L2 PE 1 SV 2	Regular	25.8659	42.43	78192.2	5	4	57	2.62	10964	7386	4750	1.7305	0.1353	Red
14895	Q13464	ROCK1_HUMAN	Rho associated protein kinase 1 OS Homo sapiens GN ROCK1 PE 1 SV 1	Regular	25.8269	42.41	159201	18	10	144	2.58	94009	30807	25269	7.2179	1.1491	Red
18547	Q8IWV8	UBR2_HUMAN	E3 ubiquitin protein ligase UBR2 OS Homo sapiens GN UBR2 PE 1 SV 1	Regular	25.8125	42.38	203960	12	9	135	0.63	74958	146505	21929	34.3252	7.001	Red
8800	Q92794	KAT6A_HUMAN	Histone acetyltransferase KAT6A OS Homo sapiens GN KAT6A PE 1 SV 2	Regular	25.8016	42.35	227708	18	11	145	2.2	32608	8959	27453	2.099	0.478	Red	8801
10716	Q6WCQ1	MPRIP_HUMAN	Myosin phosphatase Rho interacting protein OS Homo sapiens GN MPRIP PE 1 SV 3	Regular	25.7957	42.32	117332	12	13	102	1.56	37951	8322	11599	1.9498	0.2288	Red
17507	Q9Y4G6	TLN2_HUMAN	Talin 2 OS Homo sapiens GN TLN2 PE 1 SV 4	Regular	25.7826	42.29	273952	23	19	201	2.05	128338	46727.9	29256	10.948	2.9992	Red	17506
11289	P29120	NEC1_HUMAN	Neuroendocrine convertase 1 OS Homo sapiens GN PCSK1 PE 1 SV 2	Regular	25.7304	42.34	84779	7	2	56	1.33	12253	19779	6992	4.6341	0.3929	Red
10445	Q8IWI9	MGAP_HUMAN	MAX gene associated protein OS Homo sapiens GN MGA PE 1 SV 2	Regular	25.7079	42.31	333990	24	10	234	1.78	111698	14130	26012	3.3106	1.1057	Green	16779
6484	Q5H8C1	FREM1_HUMAN	FRAS1 related extracellular matrix protein 1 OS Homo sapiens GN FREM1 PE 1 SV 3	Regular	25.563	42.36	245980	12	6	150	2.98	17783	10829	8155	2.5372	0.6241	Red
5639	O60645	EXOC3_HUMAN	Exocyst complex component 3 OS Homo sapiens GN EXOC3 PE 1 SV 2	Regular	25.5429	42.33	87358.2	5	5	74	3.04	6935	4156.5	3721	0.9738	0.0851	Red
7626	P42694	HELZ_HUMAN	Probable helicase with zinc finger domain OS Homo sapiens GN HELZ PE 1 SV 2	Regular	25.5399	42.3	220738	13	7	127	2.37	24902	8554	7109	2.0041	0.4424	Red
17320	Q9Y5Q8	TF3C5_HUMAN	General transcription factor 3C polypeptide 5 OS Homo sapiens GN GTF3C5 PE 1 SV 2	Regular	25.5349	42.27	60027.1	6	5	54	6.74	14574	6117	3035	1.4332	0.086	Red
19579	Q86UP3	ZFHX4_HUMAN	Zinc finger homeobox protein 4 OS Homo sapiens GN ZFHX4 PE 1 SV 1	Regular	25.4387	42.28	398407	20	13	254	1.63	57478	10423	9742	2.442	0.9729	Red
10930	Q8IUG5	MY18B_HUMAN	Unconventional myosin XVIIIb OS Homo sapiens GN MYO18B PE 1 SV 1	Regular	25.428	42.26	287352	21	15	236	1.25	74793	4997	15256	1.1708	0.3364	Red	24421 5111 39798 21254 25353
5998	Q75VX8	FA59B_HUMAN	Protein FAM59B OS Homo sapiens GN FAM59B PE 2 SV 3	Regular	25.4113	42.27	93851.9	4	3	62	4.69	5378	5971.5	1857	1.3991	0.1313	Red
11090	Q8IZF0	NALCN_HUMAN	Sodium leak channel non selective protein OS Homo sapiens GN NALCN PE 1 SV 1	Regular	25.3781	42.28	202328	14	9	106	2.47	32337	10904	11324	2.5547	0.5169	Red
3595	A6NMZ7	CO6A6_HUMAN	Collagen alpha 6 VI chain OS Homo sapiens GN COL6A6 PE 1 SV 2	Regular	25.3527	42.25	248828	19	11	179	1.99	81970	40552	10512	9.5011	2.3641	Red	3652
9851	Q38SD2	LRRK1_HUMAN	Leucine rich repeat serine threonine protein kinase 1 OS Homo sapiens GN LRRK1 PE 1 SV 3	Regular	25.2738	42.26	228530	19	9	143	0.84	27257	19677	17571	4.6102	1.0536	Red
195	P54646	AAPK2_HUMAN	5 AMP activated protein kinase catalytic subunit alpha 2 OS Homo sapiens GN PRKAA2 PE 1 SV 2	Regular	25.1998	42.27	62890	11	5	38	4.89	23551	7470	6318	1.7502	0.1101	Red
10983	Q9UKN7	MYO15_HUMAN	Unconventional myosin XV OS Homo sapiens GN MYO15A PE 1 SV 2	Regular	25.1257	42.24	397859	29	15	251	2.41	73637	17154	19735	4.0191	1.599	Red
19197	Q9ULM3	YETS2_HUMAN	YEATS domain containing protein 2 OS Homo sapiens GN YEATS2 PE 1 SV 2	Regular	24.7156	42.44	151694	10	7	99	0.77	19798	5688	6623	1.3327	0.2022	Red
8780	O60229	KALRN_HUMAN	Kalirin OS Homo sapiens GN KALRN PE 1 SV 2	Regular	24.6899	42.42	343311	29	17	246	1.47	317547	20401	38726	4.7798	1.641	Red
964	P06727	APOA4_HUMAN	Apolipoprotein A IV OS Homo sapiens GN APOA4 PE 1 SV 3	Regular	24.6533	42.43	45399.1	5	5	42	3.28	9603	5898	3573	1.3819	0.0627	Red
14935	P24928	RPB1_HUMAN	DNA directed RNA polymerase II subunit RPB1 OS Homo sapiens GN POLR2A PE 1 SV 2	Regular	24.567	42.4	218545	10	11	132	2.03	53328	16370	6534	3.8354	0.8382	Red
19839	Q8TF39	ZN483_HUMAN	Zinc finger protein 483 OS Homo sapiens GN ZNF483 PE 1 SV 3	Regular	24.5179	42.37	87037.1	7	6	66	4.44	38082	7825.5	5522	1.8335	0.1596	Red
10559	Q8NEZ4	MLL3_HUMAN	Histone lysine N methyltransferase MLL3 OS Homo sapiens GN MLL3 PE 1 SV 3	Regular	24.5109	42.34	548613	24	15	320	0.94	88027	30884	18316	7.2359	3.9697	Red
9171	Q02156	KPCE_HUMAN	Protein kinase C epsilon type OS Homo sapiens GN PRKCE PE 1 SV 1	Regular	24.4915	42.39	85042.6	8	4	62	1.22	17398	8841	8664	2.0714	0.1762	Red
3014	Q9HCK8	CHD8_HUMAN	Chromodomain helicase DNA binding protein 8 OS Homo sapiens GN CHD8 PE 1 SV 5	Regular	24.4288	42.48	292344	11	9	168	2.13	74783	6572	11238	1.5398	0.4501	Red	3015
5111	Q8IVF4	DYH10_HUMAN	Dynein heavy chain 10 axonemal OS Homo sapiens GN DNAH10 PE 1 SV 4	Regular	24.3586	42.52	518035	30	23	370	1.45	88662	19269	25876	4.5146	2.3387	Red	24421 10930 39798 21254 25353
8660	Q9Y4D8	K0614_HUMAN	Probable E3 ubiquitin protein ligase C12orf51 OS Homo sapiens GN C12orf51 PE 1 SV 5	Regular	24.3052	42.53	444990	22	13	277	0.58	49144	9645	11277	2.2598	1.0056	Red
8705	Q5JYT7	K1755_HUMAN	Uncharacterized protein KIAA1755 OS Homo sapiens GN KIAA1755 PE 2 SV 2	Regular	24.2973	42.51	132215	5	6	90	3.92	19127	10549	4037	2.4716	0.3268	Red
10478	Q29980	MICB_HUMAN	MHC class I polypeptide related sequence B OS Homo sapiens GN MICB PE 1 SV 1	Regular	24.1508	42.63	43159.4	7	3	24	4.44	23986	17824.5	3020	4.1762	0.1802	Red
2007	Q15878	CAC1E_HUMAN	Voltage dependent R type calcium channel subunit alpha 1E OS Homo sapiens GN CACNA1E PE 1 SV 3	Regular	24.1398	42.6	263785	12	8	134	1.25	89125	24169	8832	5.6626	1.4937	Red
14256	P28749	RBL1_HUMAN	Retinoblastoma like protein 1 OS Homo sapiens GN RBL1 PE 1 SV 3	Regular	24.1119	42.61	122216	10	5	91	0.84	18083	5448	7957	1.2764	0.156	Red
11530	Q99784	NOE1_HUMAN	Noelin OS Homo sapiens GN OLFM1 PE 1 SV 4	Regular	24.0485	42.7	55684.9	4	5	29	3.09	31920	4830	4147	1.1316	0.063	Red
11002	B2RTY4	MYO9A_HUMAN	Unconventional myosin IXa OS Homo sapiens GN MYO9A PE 1 SV 2	Regular	24.0267	42.67	295101	24	18	235	2.75	77052	18168	20175	4.2566	1.2561	Red	5902 29164
12733	Q6V1P9	PCD23_HUMAN	Protocadherin 23 OS Homo sapiens GN DCHS2 PE 2 SV 1	Regular	24.0237	42.64	323945	11	5	192	1.37	78899	67754	13392	15.8743	5.1424	Red
3185	Q7Z3E2	CJ118_HUMAN	Uncharacterized protein C10orf118 OS Homo sapiens GN C10orf118 PE 2 SV 2	Regular	23.8913	42.65	104371	9	6	97	4.68	23128	12265	7595	2.8736	0.2999	Red
13203	Q9NTG1	PKDRE_HUMAN	Polycystic kidney disease and receptor for egg jelly related protein OS Homo sapiens GN PKDREJ PE 2	Regular	23.8898	42.62	258073	14	9	149	1.29	51237	17760	15304	4.1611	1.0739	Red
9752	Q8TF66	LRC15_HUMAN	Leucine rich repeat containing protein 15 OS Homo sapiens GN LRRC15 PE 1 SV 2	Regular	23.8578	42.6	65278.7	5	3	30	2.75	39653	35850	4918	8.3994	0.5483	Red
5345	Q96JJ3	ELMO2_HUMAN	Engulfment and cell motility protein 2 OS Homo sapiens GN ELMO2 PE 1 SV 2	Regular	23.8329	42.57	83071.5	9	7	59	5.83	29604	23127	7114	5.4185	0.4501	Red
18293	Q14679	TTLL4_HUMAN	Tubulin polyglutamylase TTLL4 OS Homo sapiens GN TTLL4 PE 1 SV 2	Regular	23.7669	42.61	134690	10	6	83	1.33	18915	10719	7965	2.5114	0.3383	Red
8677	Q8WUJ3	K1199_HUMAN	Protein KIAA1199 OS Homo sapiens GN KIAA1199 PE 1 SV 2	Regular	23.7615	42.59	154538	20	12	90	1.62	49515	8701.5	10856	2.0387	0.3151	Red
11379	P19838	NFKB1_HUMAN	Nuclear factor NF kappa B p105 subunit OS Homo sapiens GN NFKB1 PE 1 SV 2	Regular	23.7417	42.6	105983	5	4	72	2.79	17020	7143	3048	1.6736	0.1774	Red
16347	Q6Q759	SPG17_HUMAN	Sperm associated antigen 17 OS Homo sapiens GN SPAG17 PE 1 SV 1	Regular	23.5865	42.76	252940	21	13	179	2.16	56418	12766	12460	2.991	0.7565	Red
3512	A5YKK6	CNOT1_HUMAN	CCR4 NOT transcription complex subunit 1 OS Homo sapiens GN CNOT1 PE 1 SV 2	Regular	23.458	42.8	269278	20	14	185	1.81	65210	8478	21503	1.9863	0.5349	Red
13200	P98161	PKD1_HUMAN	Polycystin 1 OS Homo sapiens GN PKD1 PE 1 SV 3	Regular	23.4071	42.77	467947	27	18	206	1.51	67297	11698	33818	2.7408	1.2825	Red
855	Q9ULJ7	ANR50_HUMAN	Ankyrin repeat domain containing protein 50 OS Homo sapiens GN ANKRD50 PE 1 SV 4	Regular	23.3692	42.78	157798	19	11	98	0.84	59640	23016	13868	5.3925	0.8509	Red
17878	Q9NS56	TOPRS_HUMAN	E3 ubiquitin protein ligase Topors OS Homo sapiens GN TOPORS PE 1 SV 1	Regular	23.3364	42.76	120224	9	5	87	1.05	39067	3615	7501	0.847	0.1018	Red
1377	Q13535	ATR_HUMAN	Serine threonine protein kinase ATR OS Homo sapiens GN ATR PE 1 SV 3	Regular	23.2074	42.73	304960	29	17	206	2.12	113008	22464	39858	5.2632	1.6051	Yellow
16477	Q6ZRS2	SRCAP_HUMAN	Helicase SRCAP OS Homo sapiens GN SRCAP PE 1 SV 3	Regular	23.141	42.74	345209	19	8	152	0.8	46399	11935.5	12032	2.7964	0.9653	Red
4745	Q8TF46	DI3L1_HUMAN	DIS3 like exonuclease 1 OS Homo sapiens GN DIS3L PE 1 SV 2	Regular	23.1075	42.71	122270	5	5	92	3.51	10365	7303	3159	1.711	0.2092	Red
6507	Q5JV73	FRPD3_HUMAN	FERM and PDZ domain containing protein 3 OS Homo sapiens GN FRMPD3 PE 2 SV 2	Regular	23.0046	42.79	200977	13	12	134	2.93	38167	12470	13772	2.9216	0.5872	Red
12728	Q96JQ0	PCD16_HUMAN	Protocadherin 16 OS Homo sapiens GN DCHS1 PE 2 SV 1	Regular	22.9472	42.8	346923	25	15	182	2.4	56540	8753.46	16855	2.0509	0.7115	Red	2812
15173	Q15413	RYR3_HUMAN	Ryanodine receptor 3 OS Homo sapiens GN RYR3 PE 1 SV 3	Regular	22.9368	42.77	558145	37	21	363	1.4	113233	20296	26198	4.7552	2.6541	Red	15172
15398	Q9H2J7	S6A15_HUMAN	Sodium dependent neutral amino acid transporter B 0 AT2 OS Homo sapiens GN SLC6A15 PE 1 SV 1	Regular	22.8892	42.82	82748.9	3	3	49	2.47	10359	3339	2010	0.7823	0.0647	Red
10187	O15021	MAST4_HUMAN	Microtubule associated serine threonine protein kinase 4 OS Homo sapiens GN MAST4 PE 1 SV 3	Regular	22.8276	42.9	286602	20	13	202	3.12	117470	77932	16384	18.259	5.2331	Red
10994	Q8NEV4	MYO3A_HUMAN	Myosin IIIa OS Homo sapiens GN MYO3A PE 1 SV 2	Regular	22.7505	42.91	187691	15	9	133	0.5	49828	17637	10412	4.1322	0.7756	Red
8781	Q14678	KANK1_HUMAN	KN motif and ankyrin repeat domain containing protein 1 OS Homo sapiens GN KANK1 PE 1 SV 3	Regular	22.6287	43.1	149114	6	6	98	2.59	15207	8971	9747	2.1018	0.3134	Red
10956	Q9UKX3	MYH13_HUMAN	Myosin 13 OS Homo sapiens GN MYH13 PE 1 SV 2	Regular	22.5659	43.11	224746	24	20	160	4.49	274844	10691	24588	2.5048	0.563	Red	10962 10961 10966 10964 10960 10959 10965
6360	P21333	FLNA_HUMAN	Filamin A OS Homo sapiens GN FLNA PE 1 SV 4	Regular	22.5614	43.08	283477	13	9	176	1.96	51910	12416	6155	2.909	0.8246	Red
9013	P46013	KI67_HUMAN	Antigen KI 67 OS Homo sapiens GN MKI67 PE 1 SV 2	Regular	22.4076	43.13	360918	42	23	333	2.92	93879	39562	33243	9.2691	3.3454	Red
18935	Q8IZQ1	WDFY3_HUMAN	WD repeat and FYVE domain containing protein 3 OS Homo sapiens GN WDFY3 PE 1 SV 2	Regular	22.3168	43.1	399764	22	16	258	1.05	60801	10823	17604	2.5358	1.0137	Red
17109	Q66K14	TBC9B_HUMAN	TBC1 domain family member 9B OS Homo sapiens GN TBC1D9B PE 1 SV 3	Regular	22.2115	43.11	141666	6	4	98	1.36	13868	3888	3477	0.9109	0.129	Red
18623	O75385	ULK1_HUMAN	Serine threonine protein kinase ULK1 OS Homo sapiens GN ULK1 PE 1 SV 2	Regular	22.1541	43.08	113658	6	4	63	2.29	33223	35641.1	9330	8.3505	0.9491	Red	18624
3630	Q96JB2	COG3_HUMAN	Conserved oligomeric Golgi complex subunit 3 OS Homo sapiens GN COG3 PE 1 SV 3	Regular	22.0638	43.09	95065.5	6	5	70	3.26	20746	4921.5	4318	1.1531	0.1096	Red
4441	Q9P219	DAPLE_HUMAN	Protein Daple OS Homo sapiens GN CCDC88C PE 1 SV 3	Regular	22.0015	43.1	229371	20	15	204	0.35	64336	15327	15699	3.591	0.8237	Red
17684	O94876	TMCC1_HUMAN	Transmembrane and coiled coil domains protein 1 OS Homo sapiens GN TMCC1 PE 1 SV 3	Regular	21.9567	43.11	72482.3	10	5	58	1.99	94252	18627	6831	4.3642	0.3163	Red
19329	A6NJU9	YP038_HUMAN	Putative NPIP like protein LOC613037 OS Homo sapiens PE 5 SV 4	Regular	21.9085	43.15	126819	18	7	73	2.64	42844	0	18390			Red	11625
17190	Q13428	TCOF_HUMAN	Treacle protein OS Homo sapiens GN TCOF1 PE 1 SV 3	Regular	21.7911	43.3	152334	20	13	101	2.49	53657	24653	16060	5.776	0.8799	Red
2257	Q96MI9	CBPC4_HUMAN	Cytosolic carboxypeptidase 4 OS Homo sapiens GN AGBL1 PE 2 SV 2	Regular	21.7895	43.28	121992	9	6	79	2.06	59982	38865	14328	9.1058	1.1108	Red
7116	Q3T8J9	GON4L_HUMAN	GON 4 like protein OS Homo sapiens GN GON4L PE 1 SV 1	Regular	21.7519	43.29	250617	15	9	169	1.65	15155	5044	9129	1.1818	0.2962	Red
3832	Q9HCH3	CPNE5_HUMAN	Copine 5 OS Homo sapiens GN CPNE5 PE 1 SV 2	Regular	21.6915	43.26	66361	4	4	46	1.69	6369	8469	3212	1.9842	0.1317	Red
225	Q86UQ4	ABCAD_HUMAN	ATP binding cassette sub family A member 13 OS Homo sapiens GN ABCA13 PE 2 SV 3	Regular	21.6698	43.23	580894	30	20	352	1.52	108258	8815	20811	2.0653	1.1997	Red
5797	Q9Y4F4	F179B_HUMAN	Protein FAM179B OS Homo sapiens GN FAM179B PE 1 SV 4	Regular	21.6279	43.24	190729	8	9	135	0.47	41076	3087	12142	0.7233	0.1379	Red
4059	Q7Z407	CSMD3_HUMAN	CUB and sushi domain containing protein 3 OS Homo sapiens GN CSMD3 PE 2 SV 3	Regular	21.405	43.35	414269	13	10	197	0.59	36408	8691	14011	2.0362	0.8436	Red
7650	Q9UII4	HERC5_HUMAN	E3 ISG15 protein ligase HERC5 OS Homo sapiens GN HERC5 PE 1 SV 2	Regular	21.2404	43.33	118278	10	9	90	1.17	29429	13911	10243	3.2593	0.3855	Red
5472	Q99814	EPAS1_HUMAN	Endothelial PAS domain containing protein 1 OS Homo sapiens GN EPAS1 PE 1 SV 3	Regular	21.2283	43.3	97713.9	13	7	52	1.03	63010	51501	10245	12.0664	1.1791	Red
1430	Q9UPN4	AZI1_HUMAN	5 azacytidine induced protein 1 OS Homo sapiens GN AZI1 PE 1 SV 3	Regular	21.2219	43.27	122605	11	9	111	1.39	63339	2847	7408	0.667	0.0818	Red
17846	Q9UPQ9	TNR6B_HUMAN	Trinucleotide repeat containing gene 6B protein OS Homo sapiens GN TNRC6B PE 1 SV 4	Regular	21.2189	43.28	194858	6	6	109	4.36	42062	34230	7089	8.0199	1.5627	Red
1582	Q6W2J9	BCOR_HUMAN	BCL 6 corepressor OS Homo sapiens GN BCOR PE 1 SV 1	Regular	21.143	43.29	193729	14	12	135	1.42	215653	6691.5	32059	1.5678	0.3037	Red
19000	Q96KV7	WDR90_HUMAN	WD repeat containing protein 90 OS Homo sapiens GN WDR90 PE 1 SV 2	Regular	21.1428	43.26	190802	13	6	103	1.2	30105	7077	5218	1.6581	0.3164	Red
15625	Q58EX2	SDK2_HUMAN	Protein sidekick 2 OS Homo sapiens GN SDK2 PE 1 SV 3	Regular	21.1369	43.24	240309	17	12	141	2.49	47553	24993	13777	5.8557	1.4072	Red
5114	Q0VDD8	DYH14_HUMAN	Dynein heavy chain 14 axonemal OS Homo sapiens GN DNAH14 PE 2 SV 3	Regular	20.953	43.24	404172	28	19	268	1.48	100747	47121	21290	11.0402	4.4621	Red
17876	Q92547	TOPB1_HUMAN	DNA topoisomerase 2 binding protein 1 OS Homo sapiens GN TOPBP1 PE 1 SV 3	Regular	20.9505	43.22	172789	15	6	121	0.92	39011	47856	6548	11.2124	1.9374	Red
12863	O76074	PDE5A_HUMAN	cGMP specific 3 5 cyclic phosphodiesterase OS Homo sapiens GN PDE5A PE 1 SV 2	Regular	20.9449	43.19	101411	8	3	81	2.29	7369	8388	5429	1.9653	0.1993	Red
719	Q8IY63	AMOL1_HUMAN	Angiomotin like protein 1 OS Homo sapiens GN AMOTL1 PE 1 SV 1	Regular	20.9421	43.17	106917	6	5	72	2.3	23215	13399.5	9086	3.1394	0.3357	Red	720
14972	O00411	RPOM_HUMAN	DNA directed RNA polymerase mitochondrial OS Homo sapiens GN POLRMT PE 1 SV 2	Regular	20.9051	43.21	140388	9	5	95	2.6	27255	33112.5	6434	7.758	1.0891	Red
19562	P15822	ZEP1_HUMAN	Zinc finger protein 40 OS Homo sapiens GN HIVEP1 PE 1 SV 3	Regular	20.8369	43.22	299488	20	15	171	1.8	101059	9037	18977	2.1173	0.6341	Red
285	O00763	ACACB_HUMAN	Acetyl CoA carboxylase 2 OS Homo sapiens GN ACACB PE 1 SV 3	Regular	20.7985	43.19	278537	13	13	182	2.73	54390	13439	12381	3.1487	0.877	Red
1789	Q96Q07	BTBD9_HUMAN	BTB POZ domain containing protein 9 OS Homo sapiens GN BTBD9 PE 2 SV 2	Regular	20.7768	43.16	70157.2	10	6	44	2.94	29536	16138.5	9191	3.7811	0.2653	Red
8468	P48200	IREB2_HUMAN	Iron responsive element binding protein 2 OS Homo sapiens GN IREB2 PE 1 SV 3	Regular	20.7463	43.14	106071	10	5	67	2.49	12356	7645.5	4286	1.7913	0.19	Red
4642	Q6IQ26	DEN5A_HUMAN	DENN domain containing protein 5A OS Homo sapiens GN DENND5A PE 1 SV 2	Regular	20.7398	43.11	148636	13	9	102	4.51	26336	4743	11540	1.1113	0.1652	Red	4643
1064	Q96PE2	ARHGH_HUMAN	Rho guanine nucleotide exchange factor 17 OS Homo sapiens GN ARHGEF17 PE 1 SV 1	Regular	20.6898	43.08	223783	14	10	149	1.99	33985	18659	9145	4.3717	0.9783	Red
11326	Q92859	NEO1_HUMAN	Neogenin OS Homo sapiens GN NEO1 PE 1 SV 2	Regular	20.3893	43.27	160758	6	4	88	1.37	18362	8598	4633	2.0145	0.3238	Red	15675 4025
9407	P24043	LAMA2_HUMAN	Laminin subunit alpha 2 OS Homo sapiens GN LAMA2 PE 1 SV 4	Regular	20.3626	43.31	353201	18	12	243	1.09	51084	10106	16097	2.3678	0.8363	Red
3574	P08123	CO1A2_HUMAN	Collagen alpha 2 I chain OS Homo sapiens GN COL1A2 PE 1 SV 7	Regular	20.3603	43.28	129827	13	7	88	0.66	35241	3006	7964	0.7043	0.0914	Red
2744	Q9H799	CE042_HUMAN	Uncharacterized protein C5orf42 OS Homo sapiens GN C5orf42 PE 1 SV 4	Regular	20.3578	43.26	365510	20	14	232	1.44	37664	12351	11304	2.8938	1.0577	Red
7651	Q8IVU3	HERC6_HUMAN	Probable E3 ubiquitin protein ligase HERC6 OS Homo sapiens GN HERC6 PE 2 SV 2	Regular	20.3072	43.26	116609	16	9	82	1.96	28206	5151	8318	1.2068	0.1407	Red
3531	Q96NU0	CNT3B_HUMAN	Contactin associated protein like 3B OS Homo sapiens GN CNTNAP3B PE 2 SV 2	Regular	20.2512	43.31	142635	14	7	83	2.41	25517	6304.5	8889	1.4771	0.2107	Red
18131	Q9BX84	TRPM6_HUMAN	Transient receptor potential cation channel subfamily M member 6 OS Homo sapiens GN TRPM6 PE 1 SV 2	Regular	20.1956	43.32	233875	17	10	143	1.04	30115	11298	76881	2.647	0.6191	Red	11383
7847	Q9BVR0	HRC23_HUMAN	Putative HERC2 like protein 3 OS Homo sapiens GN HERC2P3 PE 5 SV 2	Regular	20.1763	43.29	130768	4	3	69	1.47	26472	34369.5	5999	8.0526	1.053	Red
18825	Q5THJ4	VP13D_HUMAN	Vacuolar protein sorting associated protein 13D OS Homo sapiens GN VPS13D PE 1 SV 1	Regular	20.0917	43.33	495609	26	22	334	1.8	95577	25442	21666	5.9609	2.9543	Red	13695
12517	O75747	P3C2G_HUMAN	Phosphatidylinositol 4 phosphate 3 kinase C2 domain containing subunit gamma OS Homo sapiens GN PIK3	Regular	20.0806	43.31	167540	6	8	106	3.53	39286	24847	4721	5.8215	0.9753	Red
10183	O00187	MASP2_HUMAN	Mannan binding lectin serine protease 2 OS Homo sapiens GN MASP2 PE 1 SV 4	Regular	20.0579	43.28	77242.2	3	4	42	5.69	5481	3692	4863	0.865	0.0668	Red
10515	O75030	MITF_HUMAN	Microphthalmia associated transcription factor OS Homo sapiens GN MITF PE 1 SV 2	Regular	20.0041	43.25	59365.9	3	4	31	1.71	30006	18546	2593	4.3452	0.258	Red
9837	O75581	LRP6_HUMAN	Low density lipoprotein receptor related protein 6 OS Homo sapiens GN LRP6 PE 1 SV 2	Regular	19.8342	43.5	183452	10	7	105	0.68	20071	5037	6813	1.1801	0.2165	Red
18824	Q709C8	VP13C_HUMAN	Vacuolar protein sorting associated protein 13C OS Homo sapiens GN VPS13C PE 1 SV 1	Regular	19.7721	43.47	424729	23	19	295	1.76	78721	39428	18662	9.2377	3.9235	Red
12666	Q8TEW0	PARD3_HUMAN	Partitioning defective 3 homolog OS Homo sapiens GN PARD3 PE 1 SV 2	Regular	19.7028	43.45	151937	14	8	118	2.95	47909	34194	11238	8.0114	1.2172	Red
4419	Q9Y4D1	DAAM1_HUMAN	Disheveled associated activator of morphogenesis 1 OS Homo sapiens GN DAAM1 PE 1 SV 2	Regular	19.6633	43.42	124044	12	11	98	1.39	74767	14604	12567	3.4216	0.4244	Red
1728	Q12830	BPTF_HUMAN	Nucleosome remodeling factor subunit BPTF OS Homo sapiens GN BPTF PE 1 SV 3	Regular	19.5979	43.43	341000	31	17	225	0.59	147521	61801.5	24918	14.4797	4.9376	Red
18963	O94967	WDR47_HUMAN	WD repeat containing protein 47 OS Homo sapiens GN WDR47 PE 1 SV 1	Regular	19.5525	43.44	103489	11	5	62	1.63	14636	3570	7015	0.8364	0.0866	Red
6404	Q8TF40	FNIP1_HUMAN	Folliculin interacting protein 1 OS Homo sapiens GN FNIP1 PE 1 SV 3	Regular	19.5481	43.41	132552	11	6	95	2.23	17602	6253.5	5246	1.4652	0.1942	Red
1637	Q9Y6D6	BIG1_HUMAN	Brefeldin A inhibited guanine nucleotide exchange protein 1 OS Homo sapiens GN ARFGEF1 PE 1 SV 2	Regular	19.5314	43.38	210992	13	11	132	3.73	125843	95029	19608	22.2647	4.6977	Red	1638
16755	Q8IYB8	SUV3_HUMAN	ATP dependent RNA helicase SUPV3L1 mitochondrial OS Homo sapiens GN SUPV3L1 PE 1 SV 1	Regular	19.4962	43.36	88846.8	8	5	56	1.91	62813	6264	5714	1.4676	0.1304	Red
8657	O60303	K0556_HUMAN	Uncharacterized protein KIAA0556 OS Homo sapiens GN KIAA0556 PE 1 SV 4	Regular	19.4628	43.37	182058	8	6	125	1.79	32206	6966	6255	1.6321	0.2971	Red
6037	Q6ZRV2	FA83H_HUMAN	Protein FAM83H OS Homo sapiens GN FAM83H PE 1 SV 3	Regular	19.4388	43.37	127636	15	10	90	2.12	32308	4848	10619	1.1359	0.145	Red
3865	Q8IY85	CQ057_HUMAN	EF hand domain containing protein C17orf57 OS Homo sapiens GN C17orf57 PE 1 SV 2	Regular	19.3473	43.48	111213	6	5	95	3.6	40577	25877	2869	6.0628	0.6743	Red
4880	P18858	DNLI1_HUMAN	DNA ligase 1 OS Homo sapiens GN LIG1 PE 1 SV 1	Regular	19.3293	43.46	102364	8	5	88	4.57	18421	11857	2613	2.778	0.2844	Red
10554	Q9UHC1	MLH3_HUMAN	DNA mismatch repair protein Mlh3 OS Homo sapiens GN MLH3 PE 1 SV 3	Regular	19.2329	43.43	166164	7	7	126	0.55	33933	5403	6649	1.2659	0.2103	Red
10215	Q9P267	MBD5_HUMAN	Methyl CpG binding domain protein 5 OS Homo sapiens GN MBD5 PE 1 SV 3	Regular	19.1676	43.44	161264	7	4	77	2.07	24487	16386	4045	3.8391	0.6191	Red
3588	P05997	CO5A2_HUMAN	Collagen alpha 2 V chain OS Homo sapiens GN COL5A2 PE 1 SV 3	Regular	19.0675	43.55	145880	15	11	82	3.14	69167	9811	13085	2.2987	0.3353	Red
12916	O15018	PDZD2_HUMAN	PDZ domain containing protein 2 OS Homo sapiens GN PDZD2 PE 1 SV 4	Regular	19.0662	43.52	304151	18	8	216	1.9	31275	22180	10592	5.1966	1.5806	Red
4846	Q9Y485	DMXL1_HUMAN	DmX like protein 1 OS Homo sapiens GN DMXL1 PE 1 SV 3	Regular	18.9532	43.56	341660	11	9	196	2.11	95426	16487	7187	3.8628	1.3198	Red
6119	Q14517	FAT1_HUMAN	Protocadherin Fat 1 OS Homo sapiens GN FAT1 PE 1 SV 2	Regular	18.8368	43.57	509695	29	21	292	1.29	132291	67903	27540	15.9092	8.1089	Red
8954	Q9Y4C1	KDM3A_HUMAN	Lysine specific demethylase 3A OS Homo sapiens GN KDM3A PE 1 SV 4	Regular	18.7521	43.61	149565	17	11	117	1.82	46796	9307.5	14061	2.1807	0.3262	Yellow
3122	Q9P1Z9	CI174_HUMAN	Uncharacterized protein C9orf174 OS Homo sapiens GN C9orf174 PE 1 SV 2	Regular	18.7032	43.62	192526	27	15	155	1.28	82914	6807	31426	1.5948	0.307	Red
13204	Q96PX9	PKH4B_HUMAN	Pleckstrin homology domain containing family G member 4B OS Homo sapiens GN PLEKHG4B PE 2 SV 4	Regular	18.649	43.59	141664	14	5	100	0.55	8569	4452	4493	1.0431	0.1478	Red
214	Q9BZC7	ABCA2_HUMAN	ATP binding cassette sub family A member 2 OS Homo sapiens GN ABCA2 PE 1 SV 3	Regular	18.6422	43.57	272211	8	6	149	1.77	67630	62630	8725	14.6738	3.9944	Red
11496	Q12879	NMDE1_HUMAN	Glutamate NMDA receptor subunit epsilon 1 OS Homo sapiens GN GRIN2A PE 1 SV 1	Regular	18.6309	43.54	166594	15	9	103	2.46	46986	22243	13846	5.2114	0.8682	Red
6754	P32455	GBP1_HUMAN	Interferon induced guanylate binding protein 1 OS Homo sapiens GN GBP1 PE 1 SV 2	Regular	18.4153	43.65	68444.1	5	4	55	1.86	16768	4923	2654	1.1534	0.0789	Red
2764	Q8N960	CE120_HUMAN	Centrosomal protein of 120 kDa OS Homo sapiens GN CEP120 PE 2 SV 2	Regular	18.3763	43.62	113268	12	6	92	2.94	105174	42567	5824	9.9732	1.1296	Red	8120
7348	P38646	GRP75_HUMAN	Stress 70 protein mitochondrial OS Homo sapiens GN HSPA9 PE 1 SV 2	Regular	18.2667	43.6	73965.8	7	5	69	1.33	19263	5178	3631	1.2132	0.0897	Red
15171	P21817	RYR1_HUMAN	Ryanodine receptor 1 OS Homo sapiens GN RYR1 PE 1 SV 3	Regular	18.1944	43.6	570879	43	24	357	1.63	123185	7829	29176	1.8343	1.0472	Red	15172
10943	Q7Z401	MYCPP_HUMAN	C myc promoter binding protein OS Homo sapiens GN DENND4A PE 1 SV 2	Regular	18.1335	43.58	211925	20	8	133	1.83	120639	136362	23955	31.9487	6.7707	Red
7646	Q15751	HERC1_HUMAN	Probable E3 ubiquitin protein ligase HERC1 OS Homo sapiens GN HERC1 PE 1 SV 2	Regular	17.9994	43.62	539129	37	21	313	0.39	143609	5677	20987	1.3301	0.7171	Red
11559	P35228	NOS2_HUMAN	Nitric oxide synthase inducible OS Homo sapiens GN NOS2 PE 1 SV 2	Regular	17.9398	43.59	132657	10	5	90	3.64	22154	7578	4044	1.7755	0.2355	Red	5705
11207	Q9Y618	NCOR2_HUMAN	Nuclear receptor corepressor 2 OS Homo sapiens GN NCOR2 PE 1 SV 2	Regular	17.808	43.7	275546	14	10	226	1.19	40573	6991.5	10995	1.6381	0.4514	Red
15741	Q7Z333	SETX_HUMAN	Probable helicase senataxin OS Homo sapiens GN SETX PE 1 SV 4	Regular	17.7208	43.71	307214	22	16	234	2.2	140348	35771	20083	8.3809	2.5747	Red
8549	P20701	ITAL_HUMAN	Integrin alpha L OS Homo sapiens GN ITGAL PE 1 SV 3	Regular	17.6983	43.71	130024	7	4	69	1.45	24908	18349.5	9076	4.2992	0.559	Red
9051	P33176	KINH_HUMAN	Kinesin 1 heavy chain OS Homo sapiens GN KIF5B PE 1 SV 1	Regular	17.6787	43.72	110426	5	5	94	2.7	20478	3921	4121	0.9187	0.1014	Red
10250	O15068	MCF2L_HUMAN	Guanine nucleotide exchange factor DBS OS Homo sapiens GN MCF2L PE 1 SV 2	Regular	17.6401	43.73	129421	15	7	98	1.93	15375	9064.5	7779	2.1238	0.2749	Red
8664	Q8IV33	K0825_HUMAN	Uncharacterized protein KIAA0825 OS Homo sapiens GN KIAA0825 PE 2 SV 2	Regular	17.5567	43.74	149873	8	7	101	3.45	27227	7181	4200	1.6825	0.2522	Red
2032	Q9H251	CAD23_HUMAN	Cadherin 23 OS Homo sapiens GN CDH23 PE 1 SV 1	Regular	17.4696	43.78	370324	32	22	203	2.65	228901	9012	46516	2.1115	0.7819	Red
5794	Q8IX21	F178A_HUMAN	Protein FAM178A OS Homo sapiens GN FAM178A PE 1 SV 2	Regular	17.3134	43.81	132786	8	4	91	2.56	15875	10711.4	4494	2.5096	0.3332	Red	7109
224	Q86UK0	ABCAC_HUMAN	ATP binding cassette sub family A member 12 OS Homo sapiens GN ABCA12 PE 1 SV 3	Regular	17.2663	43.79	295575	17	10	177	1.7	132663	19332	18658	4.5294	1.3388	Red
10024	Q99683	M3K5_HUMAN	Mitogen activated protein kinase kinase kinase 5 OS Homo sapiens GN MAP3K5 PE 1 SV 1	Regular	17.2346	43.76	155849	9	6	112	1.02	18366	2847	9669	0.667	0.104	Red
4058	Q7Z408	CSMD2_HUMAN	CUB and sushi domain containing protein 2 OS Homo sapiens GN CSMD2 PE 1 SV 2	Regular	17.1649	43.74	387738	16	10	179	2.21	40668	14079	10785	3.2986	1.279	Red
10734	Q9Y2G1	MRF_HUMAN	Myelin gene regulatory factor OS Homo sapiens GN MRF PE 1 SV 3	Regular	17.1278	43.71	125481	6	5	66	1.74	28093	11146.5	6306	2.6116	0.3277	Red
1209	Q9NR48	ASH1L_HUMAN	Histone lysine N methyltransferase ASH1L OS Homo sapiens GN ASH1L PE 1 SV 2	Regular	17.0751	43.69	336383	25	15	241	1.41	70917	13670	19998	3.2028	1.0774	Red
8187	Q96LB3	IFT74_HUMAN	Intraflagellar transport protein 74 homolog OS Homo sapiens GN IFT74 PE 2 SV 1	Regular	16.8779	43.73	69353.5	6	5	53	4	17087	5863.5	5946	1.3738	0.0953	Red
8986	Q9NQT8	KI13B_HUMAN	Kinesin like protein KIF13B OS Homo sapiens GN KIF13B PE 1 SV 1	Regular	16.7762	43.8	204035	22	11	128	1.26	120878	14884.5	20515	3.4873	0.7115	Red
4643	Q6ZUT9	DEN5B_HUMAN	DENN domain containing protein 5B OS Homo sapiens GN DENND5B PE 1 SV 2	Regular	16.7686	43.77	146731	7	4	97	1.26	18852	0	4720			Red	4642
8458	Q9UPP2	IQEC3_HUMAN	IQ motif and SEC7 domain containing protein 3 OS Homo sapiens GN IQSEC3 PE 2 SV 3	Regular	16.7081	43.85	129161	8	5	92	0.85	55446	6396	7957	1.4985	0.1936	Red
18624	Q8IYT8	ULK2_HUMAN	Serine threonine protein kinase ULK2 OS Homo sapiens GN ULK2 PE 1 SV 3	Regular	16.7074	43.82	114348	6	4	68	1.25	15003	15714.4	3587	3.6818	0.421	Red	18623
744	Q86YJ7	AN13B_HUMAN	Ankyrin repeat domain containing protein 13B OS Homo sapiens GN ANKRD13B PE 2 SV 4	Regular	16.4874	43.8	70661.7	8	5	50	2.56	39832	9585	7774	2.2457	0.1587	Red
9830	Q9NZR2	LRP1B_HUMAN	Low density lipoprotein receptor related protein 1B OS Homo sapiens GN LRP1B PE 1 SV 2	Regular	16.4411	43.8	535173	17	10	302	0.33	52642	32377.5	8492	7.5858	4.0597	Red
5406	Q8NFI3	ENASE_HUMAN	Cytosolic endo beta N acetylglucosaminidase OS Homo sapiens GN ENGASE PE 1 SV 1	Regular	16.4329	43.78	85184.4	5	5	60	2.96	13366	5239.5	3794	1.2276	0.1046	Red
1273	Q16720	AT2B3_HUMAN	Plasma membrane calcium transporting ATPase 3 OS Homo sapiens GN ATP2B3 PE 1 SV 3	Regular	16.3327	43.88	135338	15	7	88	1.15	43860	28863	11315	6.7624	0.9152	Red	1272
6108	Q9NVI1	FANCI_HUMAN	Fanconi anemia group I protein OS Homo sapiens GN FANCI PE 1 SV 4	Regular	16.2966	43.86	150864	10	5	121	0.9	24433	45498	4997	10.6599	1.6082	Red
3590	P01031	CO5_HUMAN	Complement C5 OS Homo sapiens GN C5 PE 1 SV 4	Regular	16.2448	43.89	190016	9	5	135	0.6	11421	8802	4791	2.0623	0.3919	Red
16073	Q96Q15	SMG1_HUMAN	Serine threonine protein kinase SMG1 OS Homo sapiens GN SMG1 PE 1 SV 3	Regular	16.2313	43.9	414607	23	20	252	0.9	130337	6694	25763	1.5684	0.6503	Red	13825 3437
11206	O75376	NCOR1_HUMAN	Nuclear receptor corepressor 1 OS Homo sapiens GN NCOR1 PE 1 SV 2	Regular	16.2023	43.88	271123	12	9	206	0.66	29944	2316	7878	0.5426	0.1471	Red
17063	Q9C0C2	TB182_HUMAN	182 kDa tankyrase 1 binding protein OS Homo sapiens GN TNKS1BP1 PE 1 SV 4	Regular	16.1983	43.85	182822	14	9	149	3.35	75101	9942	13207	2.3293	0.4259	Red
12454	Q01804	OTUD4_HUMAN	OTU domain containing protein 4 OS Homo sapiens GN OTUD4 PE 1 SV 3	Regular	16.138	43.89	124772	11	5	90	1.35	32865	4827	5438	1.1309	0.1411	Red
13009	P98160	PGBM_HUMAN	Basement membrane specific heparan sulfate proteoglycan core protein OS Homo sapiens GN HSPG2 PE 1 S	Regular	16.1343	43.87	479552	31	17	260	1.02	134524	20905	26732	4.8979	2.3488	Yellow
19045	Q9BYP7	WNK3_HUMAN	Serine threonine protein kinase WNK3 OS Homo sapiens GN WNK3 PE 1 SV 3	Regular	16.1103	43.84	200298	6	6	120	0.72	10384	9484.5	3765	2.2222	0.4451	Red
8784	Q5T7N3	KANK4_HUMAN	KN motif and ankyrin repeat domain containing protein 4 OS Homo sapiens GN KANK4 PE 1 SV 1	Regular	16.0653	43.82	107969	7	4	72	1.71	11612	2964	5193	0.6944	0.075	Red
5666	Q5T1H1	EYS_HUMAN	Protein eyes shut homolog OS Homo sapiens GN EYS PE 1 SV 5	Regular	16.0164	43.85	363514	18	14	183	1.48	456005	17753	22623	4.1594	1.512	Red
13216	P08F94	PKHD1_HUMAN	Fibrocystin OS Homo sapiens GN PKHD1 PE 1 SV 1	Regular	15.9796	43.83	452405	18	12	217	1.33	53551	26992	11671	6.3241	2.861	Red
11142	Q6ZNJ1	NBEL2_HUMAN	Neurobeachin like protein 2 OS Homo sapiens GN NBEAL2 PE 1 SV 2	Regular	15.9441	43.84	305596	13	6	170	1.45	86344	15114	31969	3.5411	1.0822	Red
16494	O43295	SRGP3_HUMAN	SLIT ROBO Rho GTPase activating protein 3 OS Homo sapiens GN SRGAP3 PE 1 SV 3	Regular	15.9248	43.81	125474	10	8	92	1.36	153259	7776	19110	1.8219	0.2286	Red
19564	Q5T1R4	ZEP3_HUMAN	Transcription factor HIVEP3 OS Homo sapiens GN HIVEP3 PE 1 SV 1	Regular	15.8092	43.88	261290	24	10	163	2.12	40425	5949	11984	1.3938	0.3642	Red
5734	P00488	F13A_HUMAN	Coagulation factor XIII A chain OS Homo sapiens GN F13A1 PE 1 SV 4	Regular	15.7505	43.89	83780.7	5	4	58	3.83	7025	4044	3426	0.9475	0.0794	Red
474	Q8N7X0	ADGB_HUMAN	Androglobin OS Homo sapiens GN ADGB PE 2 SV 3	Regular	15.6732	43.96	190797	7	5	172	2.22	34299	7493	5200	1.7556	0.335	Red
10172	Q9H992	MARH7_HUMAN	E3 ubiquitin protein ligase MARCH7 OS Homo sapiens GN MARCH7 PE 1 SV 1	Regular	15.5613	43.93	78678.4	5	5	53	2.98	25725	6798	6046	1.5927	0.1253	Red
11003	Q13459	MYO9B_HUMAN	Unconventional myosin IXb OS Homo sapiens GN MYO9B PE 1 SV 3	Regular	15.4818	43.94	244998	17	15	192	0.74	53192	5847	13390	1.3699	0.3356	Red
18125	Q9HCX4	TRPC7_HUMAN	Short transient receptor potential channel 7 OS Homo sapiens GN TRPC7 PE 1 SV 1	Regular	15.3163	43.95	100304	10	6	58	1.97	19365	6025.5	10471	1.4117	0.1416	Red
11625	Q92617	NPPL3_HUMAN	Nuclear pore complex interacting protein like 3 OS Homo sapiens GN NPIPL3 PE 1 SV 5	Regular	15.2478	43.98	117760	12	6	69	4	44217	10308	15033	2.4151	0.2844	Red	19329
10967	P35579	MYH9_HUMAN	Myosin 9 OS Homo sapiens GN MYH9 PE 1 SV 4	Regular	14.836	44.11	227787	9	7	164	1.07	32225	2796.94	6370	0.6553	0.1493	Red	10955 10957 10954
19447	Q9Y493	ZAN_HUMAN	Zonadhesin OS Homo sapiens GN ZAN PE 2 SV 4	Regular	14.6976	44.21	314731	12	7	142	0.85	25163	14520	9767	3.4019	1.0707	Red
4545	Q5T197	DCST1_HUMAN	DC STAMP domain containing protein 1 OS Homo sapiens GN DCST1 PE 2 SV 1	Regular	14.3812	44.25	82194.9	3	3	48	1.27	8255	6162	2421	1.4437	0.1187	Red
13230	Q86WI1	PKHL1_HUMAN	Fibrocystin L OS Homo sapiens GN PKHD1L1 PE 2 SV 2	Regular	14.281	44.29	470582	29	16	220	1.01	43489	5598	23020	1.3116	0.6172	Red	24473
19737	Q8N554	ZN276_HUMAN	Zinc finger protein 276 OS Homo sapiens GN ZNF276 PE 1 SV 4	Regular	14.1934	44.29	68758.7	9	5	50	2.28	36146	34599	6744	8.1063	0.5574	Red
3008	O14647	CHD2_HUMAN	Chromodomain helicase DNA binding protein 2 OS Homo sapiens GN CHD2 PE 1 SV 2	Regular	14.1899	44.27	212313	10	9	150	0.44	28585	11238	9559	2.633	0.559	Red
4248	Q14999	CUL7_HUMAN	Cullin 7 OS Homo sapiens GN CUL7 PE 1 SV 2	Regular	14.0211	44.27	192929	7	6	118	1.24	13588	5451	3870	1.2771	0.2464	Red
4073	Q1MSJ5	CSPP1_HUMAN	Centrosome and spindle pole associated protein 1 OS Homo sapiens GN CSPP1 PE 1 SV 4	Regular	13.9439	44.25	145807	10	8	103	0.88	38405	14352	12056	3.3626	0.4903	Red
5253	Q5JVL4	EFHC1_HUMAN	EF hand domain containing protein 1 OS Homo sapiens GN EFHC1 PE 1 SV 1	Regular	13.939	44.23	74446.6	7	4	69	1.09	16325	11547	5748	2.7054	0.2014	Red
13441	Q9Y6A1	POMT1_HUMAN	Protein O mannosyl transferase 1 OS Homo sapiens GN POMT1 PE 1 SV 3	Regular	13.8888	44.26	85736.2	3	2	47	1.61	9001	9195	4052	2.1543	0.1847	Red
4847	Q8TDJ6	DMXL2_HUMAN	DmX like protein 2 OS Homo sapiens GN DMXL2 PE 1 SV 2	Regular	13.8545	44.3	343178	18	13	212	1.35	40846	6281	12557	1.4716	0.505	Red
15056	Q96T23	RSF1_HUMAN	Remodeling and spacing factor 1 OS Homo sapiens GN RSF1 PE 1 SV 2	Regular	13.7734	44.4	165360	10	6	131	2.01	20557	11976	5409	2.8059	0.464	Red
4899	Q5JSL3	DOC11_HUMAN	Dedicator of cytokinesis protein 11 OS Homo sapiens GN DOCK11 PE 1 SV 2	Regular	13.7544	44.37	240294	10	9	172	0.92	33712	12363	8138	2.8966	0.696	Red	4898 4910
13231	Q9Y4G2	PKHM1_HUMAN	Pleckstrin homology domain containing family M member 1 OS Homo sapiens GN PLEKHM1 PE 1 SV 3	Regular	13.5799	44.38	119439	3	2	69	2.27	31074	46611	2234	10.9207	1.3044	Red
3624	Q05707	COEA1_HUMAN	Collagen alpha 1 XIV chain OS Homo sapiens GN COL14A1 PE 1 SV 3	Regular	13.5693	44.35	194599	20	9	106	1.39	43068	3727.5	11808	0.8733	0.1699	Red
8812	Q8IY47	KBTB2_HUMAN	Kelch repeat and BTB domain containing protein 2 OS Homo sapiens GN KBTBD2 PE 2 SV 2	Regular	13.5031	44.33	72414.2	6	4	43	1.93	28064	4290	3809	1.0051	0.0728	Red
18632	Q9H3U1	UN45A_HUMAN	Protein unc 45 homolog A OS Homo sapiens GN UNC45A PE 1 SV 1	Regular	13.3529	44.31	104332	11	8	80	1.06	19544	8394	8712	1.9667	0.2052	Red
2267	Q92793	CBP_HUMAN	CREB binding protein OS Homo sapiens GN CREBBP PE 1 SV 3	Regular	157.286	44.28	268203	17	10	129	1.06	167616	8533	49636	1.9992	0.5362	Green	7877 5466 7876
7740	Q8NDA2	HMCN2_HUMAN	Hemicentin 2 OS Homo sapiens GN HMCN2 PE 2 SV 2	Regular	13.1898	44.32	550079	24	16	319	0.43	53265	7191	14953	1.6848	0.9268	Red
15686	Q96HI0	SENP5_HUMAN	Sentrin specific protease 5 OS Homo sapiens GN SENP5 PE 1 SV 3	Regular	13.1625	44.29	88004.8	4	3	62	3.44	6419	6419	2258	1.5039	0.1324	Red
13247	Q99569	PKP4_HUMAN	Plakophilin 4 OS Homo sapiens GN PKP4 PE 1 SV 2	Regular	13.087	44.3	132667	12	8	92	1.34	31333	18387	10415	4.308	0.5715	Red
4923	Q9Y3R5	DOP2_HUMAN	Protein dopey 2 OS Homo sapiens GN DOPEY2 PE 1 SV 5	Regular	13.0296	44.28	260512	8	8	173	1.09	33363	13746	8338	3.2206	0.839	Red
11771	Q5SRE5	NU188_HUMAN	Nucleoporin NUP188 homolog OS Homo sapiens GN NUP188 PE 1 SV 1	Regular	13.0051	44.25	198496	6	3	127	0.69	17992	6456	2468	1.5126	0.3002	Red
8674	Q2LD37	K1109_HUMAN	Uncharacterized protein KIAA1109 OS Homo sapiens GN KIAA1109 PE 1 SV 2	Regular	12.7328	44.29	559703	23	19	336	1.34	88774	28983	22241	6.7905	3.8007	Red
9043	Q9HAQ2	KIF9_HUMAN	Kinesin like protein KIF9 OS Homo sapiens GN KIF9 PE 1 SV 4	Regular	12.276	44.41	90328.8	3	4	80	1.65	69302	18624	6820	4.3635	0.3941	Red
18644	Q8N2C7	UNC80_HUMAN	Protein unc 80 homolog OS Homo sapiens GN UNC80 PE 2 SV 2	Regular	12.2588	44.39	367383	17	12	226	0.68	46102	7678.5	14409	1.799	0.6609	Red
3580	P08572	CO4A2_HUMAN	Collagen alpha 2 IV chain OS Homo sapiens GN COL4A2 PE 1 SV 4	Regular	12.0332	44.46	168751	24	9	103	0.88	45505	7590	10196	1.7783	0.3001	Red
2411	Q8N5R6	CCD33_HUMAN	Coiled coil domain containing protein 33 OS Homo sapiens GN CCDC33 PE 1 SV 3	Regular	12.0031	44.46	107615	9	6	70	1.88	24486	8619	4824	2.0194	0.2173	Red
3434	Q9Y6Y1	CMTA1_HUMAN	Calmodulin binding transcription activator 1 OS Homo sapiens GN CAMTA1 PE 1 SV 4	Regular	11.8366	44.47	185782	7	3	97	1.49	5513	4981.5	4535	1.1671	0.2168	Red
16758	Q15022	SUZ12_HUMAN	Polycomb protein SUZ12 OS Homo sapiens GN SUZ12 PE 1 SV 3	Regular	11.7749	44.47	83796.3	9	6	58	1.08	144565	17709	14081	4.1491	0.3477	Red
3589	P25940	CO5A3_HUMAN	Collagen alpha 3 V chain OS Homo sapiens GN COL5A3 PE 1 SV 3	Regular	11.7251	44.48	172805	15	9	108	0.69	25488	5478	9759	1.2835	0.2218	Red
3916	Q68DL7	CR063_HUMAN	Uncharacterized protein C18orf63 OS Homo sapiens GN C18orf63 PE 2 SV 2	Regular	11.572	44.46	78086.1	13	6	56	2.34	49207	8808	20518	2.0637	0.1611	Red
693	Q96L96	ALPK3_HUMAN	Alpha protein kinase 3 OS Homo sapiens GN ALPK3 PE 2 SV 2	Regular	11.4819	44.43	203553	26	14	129	1.94	136836	10938	19923	2.5627	0.5216	Red
7169	Q6PRD1	GP179_HUMAN	Probable G protein coupled receptor 179 OS Homo sapiens GN GPR179 PE 1 SV 2	Regular	11.48	44.41	260785	21	10	173	0.42	123705	176211	17477	41.2851	10.7666	Red	2812
8408	Q9Y283	INVS_HUMAN	Inversin OS Homo sapiens GN INVS PE 1 SV 2	Regular	11.3947	44.39	118910	9	5	71	1.78	29503	20862	8696	4.8878	0.5812	Red
13894	Q96EY7	PTCD3_HUMAN	Pentatricopeptide repeat containing protein 3 mitochondrial OS Homo sapiens GN PTCD3 PE 1 SV 3	Regular	11.1591	44.42	79234.2	5	5	59	1.45	18921	4926	3066	1.1541	0.0914	Red
9662	Q9Y468	LMBL1_HUMAN	Lethal 3 malignant brain tumor like protein 1 OS Homo sapiens GN L3MBTL1 PE 1 SV 3	Regular	11.1577	44.4	85024.3	3	5	47	5.19	89194	48267	9656	11.3087	0.9615	Red
1413	Q8WXX7	AUTS2_HUMAN	Autism susceptibility gene 2 protein OS Homo sapiens GN AUTS2 PE 1 SV 1	Regular	10.935	44.4	139382	8	4	117	0.71	19902	6186	5341	1.4493	0.202	Red
831	Q6UB99	ANR11_HUMAN	Ankyrin repeat domain containing protein 11 OS Homo sapiens GN ANKRD11 PE 1 SV 3	Regular	10.8268	44.44	299796	18	11	225	0.79	84892	8436	24253	1.9765	0.5925	Red
562	O00468	AGRIN_HUMAN	Agrin OS Homo sapiens GN AGRN PE 1 SV 4	Regular	10.5262	44.44	223001	9	9	123	0.68	40986	25344	8294	5.9379	1.3242	Red
3242	Q8WWK9	CKAP2_HUMAN	Cytoskeleton associated protein 2 OS Homo sapiens GN CKAP2 PE 1 SV 1	Regular	10.159	44.51	77557.1	6	2	67	1.46	29497	17145	9543	4.017	0.3115	Red
14850	Q9BXT8	RNF17_HUMAN	RING finger protein 17 OS Homo sapiens GN RNF17 PE 1 SV 3	Regular	10.0032	44.54	187324	9	7	122	0.74	50140	52221	58864	12.235	2.2919	Red
4856	Q96M86	DNHD1_HUMAN	Dynein heavy chain domain containing protein 1 OS Homo sapiens GN DNHD1 PE 1 SV 2	Regular	9.8203	44.58	539804	16	12	288	0.95	33607	4398	11206	1.0304	0.5562	Red
6485	Q5SZK8	FREM2_HUMAN	FRAS1 related extracellular matrix protein 2 OS Homo sapiens GN FREM2 PE 1 SV 2	Regular	9.7803	44.55	352811	8	4	197	0.95	14143	10083	4017	2.3624	0.8335	Red
11347	Q96JN8	NEUL4_HUMAN	Neuralized like protein 4 OS Homo sapiens GN NEURL4 PE 1 SV 2	Regular	9.7304	44.53	168675	6	5	93	2.24	81867	74802	10085	17.5256	2.9561	Red
15785	Q86YV5	SG223_HUMAN	Tyrosine protein kinase SgK223 OS Homo sapiens GN SGK223 PE 1 SV 3	Regular	9.5809	44.62	152049	10	4	105	1	35172	14325	5399	3.3563	0.5103	Red
1768	Q9UPA5	BSN_HUMAN	Protein bassoon OS Homo sapiens GN BSN PE 1 SV 4	Regular	9.5621	44.63	418580	26	15	276	0.87	128580	3450	21709	0.8083	0.3383	Red
20164	Q9P2E3	ZNFX1_HUMAN	NFX1 type zinc finger containing protein 1 OS Homo sapiens GN ZNFX1 PE 1 SV 2	Regular	9.4813	44.61	225245	15	9	152	1.2	66368	51312	22444	12.0221	2.7079	Red
16282	Q07617	SPAG1_HUMAN	Sperm associated antigen 1 OS Homo sapiens GN SPAG1 PE 1 SV 3	Regular	9.2352	44.64	104779	13	6	98	2.05	30476	5433	6127	1.2729	0.1334	Red
15441	Q8IVG5	SAM9L_HUMAN	Sterile alpha motif domain containing protein 9 like OS Homo sapiens GN SAMD9L PE 1 SV 2	Regular	9.0674	44.68	186244	7	7	146	1.01	53698	2343	23987	0.5489	0.1022	Red
1067	Q86VW2	ARHGP_HUMAN	Rho guanine nucleotide exchange factor 25 OS Homo sapiens GN ARHGEF25 PE 1 SV 2	Regular	9.1879	44.65	64641.1	6	3	38	0.69	44416	0	3826			Red	37348 31792 8335 16018 8602
4990	Q14117	DPYS_HUMAN	Dihydropyrimidinase OS Homo sapiens GN DPYS PE 1 SV 1	Regular	8.8725	44.66	57143.1	6	3	36	2.31	9677	8961	3723	2.0995	0.12	Red
1084	Q9Y4B4	ARIP4_HUMAN	Helicase ARIP4 OS Homo sapiens GN RAD54L2 PE 1 SV 4	Regular	8.7109	44.66	164138	5	6	104	1.3	17735	8676	3677	2.0327	0.3336	Red
16895	Q24JP5	T132A_HUMAN	Transmembrane protein 132A OS Homo sapiens GN TMEM132A PE 2 SV 1	Regular	8.3803	44.73	111079	3	2	60	0.98	6399	6342	2521	1.4859	0.1651	Red
18643	Q9P2D8	UNC79_HUMAN	Protein unc 79 homolog OS Homo sapiens GN UNC79 PE 2 SV 3	Regular	8.2776	44.73	299875	11	10	182	0.46	46532	4797	14952	1.1239	0.337	Red
13066	Q92576	PHF3_HUMAN	PHD finger protein 3 OS Homo sapiens GN PHF3 PE 1 SV 3	Regular	8.2729	44.71	231706	8	6	178	0.74	24117	3558	5028	0.8336	0.1932	Red
1376	P46100	ATRX_HUMAN	Transcriptional regulator ATRX OS Homo sapiens GN ATRX PE 1 SV 5	Regular	8.2044	44.69	285038	15	9	217	1.61	28945	8987	12564	2.1056	0.6002	Red
19656	P58317	ZN121_HUMAN	Zinc finger protein 121 OS Homo sapiens GN ZNF121 PE 2 SV 2	Regular	8.1843	44.66	46177.2	3	3	24	3.33	71135	181206	14019	42.4554	1.9605	Red
14575	A7KAX9	RHG32_HUMAN	Rho GTPase activating protein 32 OS Homo sapiens GN ARHGAP32 PE 1 SV 1	Regular	8.0138	44.67	232240	15	9	134	1.72	50298	30127.5	9519	7.0587	1.6393	Red
3511	Q96LI5	CNO6L_HUMAN	CCR4 NOT transcription complex subunit 6 like OS Homo sapiens GN CNOT6L PE 1 SV 2	Regular	8.0076	44.64	63514.8	4	2	47	1.44	5501	3909	952	0.9159	0.0582	Red
4755	Q9BTC0	DIDO1_HUMAN	Death inducer obliterator 1 OS Homo sapiens GN DIDO1 PE 1 SV 5	Regular	7.9209	44.65	245584	16	8	192	0.94	51615	7618.5	22629	1.785	0.4384	Red
6111	Q8IYD8	FANCM_HUMAN	Fanconi anemia group M protein OS Homo sapiens GN FANCM PE 1 SV 2	Regular	7.8647	44.63	234986	9	8	150	0.63	47700	12720	10047	2.9802	0.7003	Red
6301	P49789	FHIT_HUMAN	Bis 5 adenosyl triphosphatase OS Homo sapiens GN FHIT PE 1 SV 3	Regular	7.7092	44.63	16915.2	5	2	13	4.76	46132	108138	5112	25.336	0.4286	Red
9675	Q03252	LMNB2_HUMAN	Lamin B2 OS Homo sapiens GN LMNB2 PE 1 SV 3	Regular	7.4897	44.61	67803	5	3	65	3.33	5090	3153	3253	0.7387	0.0501	Red
11830	P52948	NUP98_HUMAN	Nuclear pore complex protein Nup98 Nup96 OS Homo sapiens GN NUP98 PE 1 SV 4	Regular	7.461	44.59	198720	12	5	105	1.43	29297	13585.5	8935	3.183	0.6325	Red
19043	Q9H4A3	WNK1_HUMAN	Serine threonine protein kinase WNK1 OS Homo sapiens GN WNK1 PE 1 SV 2	Regular	6.9574	44.65	251707	13	7	104	0.8	53999	32563.5	14867	7.6294	1.9204	Red	39008
1638	Q9Y6D5	BIG2_HUMAN	Brefeldin A inhibited guanine nucleotide exchange protein 2 OS Homo sapiens GN ARFGEF2 PE 1 SV 3	Regular	6.6591	44.68	204548	14	9	143	0.39	152806	0	30284			Red	1637
4928	Q8TEK3	DOT1L_HUMAN	Histone lysine N methyltransferase H3 lysine 79 specific OS Homo sapiens GN DOT1L PE 1 SV 2	Regular	5.8094	44.72	185652	11	6	112	0.46	39252	4605	6801	1.0789	0.2003	Red
13677	Q8TCU6	PREX1_HUMAN	Phosphatidylinositol 3 4 5 trisphosphate dependent Rac exchanger 1 protein OS Homo sapiens GN PREX1	Regular	5.7988	44.72	188884	8	4	130	0.78	13399	3723	4771	0.8723	0.1648	Red
3332	Q9UBD9	CLCF1_HUMAN	Cardiotrophin like cytokine factor 1 OS Homo sapiens GN CLCF1 PE 1 SV 1	Regular	5.5919	44.7	25404.1	4	3	15	4	15299	15261	4031	3.5756	0.0908	Red
6940	Q9NXP7	GIN1_HUMAN	Gypsy retrotransposon integrase like protein 1 OS Homo sapiens GN GIN1 PE 2 SV 3	Regular	5.414	44.68	60241.6	5	3	34	1.92	5310	2886	1901	0.6762	0.0407	Red
5497	P58107	EPIPL_HUMAN	Epiplakin OS Homo sapiens GN EPPK1 PE 1 SV 2	Regular	5.297	44.65	558017	23	13	438	0.59	35433	6162	19356	1.4437	0.8056	Red
17284	Q8NFU7	TET1_HUMAN	Methylcytosine dioxygenase TET1 OS Homo sapiens GN TET1 PE 1 SV 2	Regular	4.9095	44.69	238103	9	5	144	0.56	37560	8664	10593	2.0299	0.4833	Red
12416	Q9Y236	OSGI2_HUMAN	Oxidative stress induced growth inhibitor 2 OS Homo sapiens GN OSGIN2 PE 2 SV 1	Regular	4.7259	44.66	57185.3	4	3	32	1.98	20700	5088	2548	1.1921	0.0682	Red
13126	Q92508	PIEZ1_HUMAN	Piezo type mechanosensitive ion channel component 1 OS Homo sapiens GN PIEZO1 PE 1 SV 4	Regular	4.6134	44.64	290041	3	5	166	0.56	6855	3030	1947	0.7099	0.2059	Red
18774	P35916	VGFR3_HUMAN	Vascular endothelial growth factor receptor 3 OS Homo sapiens GN FLT4 PE 1 SV 3	Regular	3.6632	44.68	154868	11	6	99	0.81	23209	14481	8603	3.3928	0.5254	Red	18772
18546	Q8IWV7	UBR1_HUMAN	E3 ubiquitin protein ligase UBR1 OS Homo sapiens GN UBR1 PE 1 SV 1	Regular	3.3198	44.65	203576	9	6	129	0.86	13970	3006	3424	0.7043	0.1434	Red
11424	Q14112	NID2_HUMAN	Nidogen 2 OS Homo sapiens GN NID2 PE 1 SV 3	Regular	2.6348	44.63	154048	6	5	92	0.58	54076	8625	10381	2.0208	0.3113	Red
14273	Q9P2N5	RBM27_HUMAN	RNA binding protein 27 OS Homo sapiens GN RBM27 PE 1 SV 2	Regular	2.5604	44.61	119174	9	5	73	0.85	16022	8928	8027	2.0918	0.2493	Red
15424	Q15424	SAFB1_HUMAN	Scaffold attachment factor B1 OS Homo sapiens GN SAFB PE 1 SV 4	Regular	1.9576	44.61	103098	4	3	78	1.31	18005	28332	2873	6.638	0.6844	Red
35151	RANDOM14918	RANDOM14918	Random Sequence 14918	Random	13.2107	0	195527	3	1	143	0.23	29619	0	2076			Green	9183
25721	RANDOM5488	RANDOM5488	Random Sequence 5488	Random	54.4214	0	113035	3	1	81	0.5	29407	0	3265			Green	13021 13020
30837	RANDOM10604	RANDOM10604	Random Sequence 10604	Random	136.662	0	116498	4	1	86	0.49	20115	0	4558			Green	15042
21624	RANDOM1391	RANDOM1391	Random Sequence 1391	Random	24.6226	0	134656	3	1	76	0.41	24595	0	4009			Red	11792 17291
20451	RANDOM218	RANDOM218	Random Sequence 218	Random	20.5057	0	184634	2	1	129	0	2796	0	413			Yellow	15026
31792	RANDOM11559	RANDOM11559	Random Sequence 11559	Random	2.4027	0	160285	3	1	111	0.28	38466	0	1914			Red	37348 8335 16018 1067 8602
35522	RANDOM15289	RANDOM15289	Random Sequence 15289	Random	76.498	0	84588.2	5	1	65	0.81	30573	0	9157			Green	5625
38509	RANDOM18276	RANDOM18276	Random Sequence 18276	Random	60.6906	0	96031.2	4	1	71	0.59	30052	0	3206			Yellow	8584 33929
33929	RANDOM13696	RANDOM13696	Random Sequence 13696	Random	60.6906	0	464488	4	1	307	0.12	30052	0	3206			Yellow	38509 8584
25459	RANDOM5226	RANDOM5226	Random Sequence 5226	Random	56.7572	0	64226.2	4	1	48	0.88	22962	0	2589			Yellow	18549
21745	RANDOM1512	RANDOM1512	Random Sequence 1512	Random	0.1167	0	173606	0	1	122	0	3134	0	255			Red	618 12812
37348	RANDOM17115	RANDOM17115	Random Sequence 17115	Random	2.4027	0	132124	3	1	96	0.34	38466	0	1914			Red	31792 8335 16018 1067 8602
20761	RANDOM528	RANDOM528	Random Sequence 528	Random	6.8151	0	138168	3	1	103	0	6628	0	1597			Red	16100
23872	RANDOM3639	RANDOM3639	Random Sequence 3639	Random	2.7581	0	197628	2	1	130	0.29	100387	0	6713			Red	2770
31374	RANDOM11141	RANDOM11141	Random Sequence 11141	Random	5.8967	0	332795	2	1	237	0	6736	0	394			Red	2390
36307	RANDOM16074	RANDOM16074	Random Sequence 16074	Random	2.7095	0	410433	3	1	255	0.14	1813	0	923			Red	5123
39008	RANDOM18775	RANDOM18775	Random Sequence 18775	Random	0.1094	0	153944	0	1	99	0	2030	0	661			Red	19043
23671	RANDOM3438	RANDOM3438	Random Sequence 3438	Random	8.1562	0	457983	4	1	305	0.17	11067	0	2286			Red	11520
38504	RANDOM18271	RANDOM18271	Random Sequence 18271	Random	1.2838	0	307147	1	1	198	0	11696	0	971			Red	19093
29164	RANDOM8931	RANDOM8931	Random Sequence 8931	Random	5.5093	0	170774	2	1	114	0	6223	0	641			Red	11002 5902
24421	RANDOM4188	RANDOM4188	Random Sequence 4188	Random	1.0399	0	132621	2	1	92	0	3013	0	2078			Red	10930 5111 39798 21254 25353
39798	RANDOM19565	RANDOM19565	Random Sequence 19565	Random	1.0399	0	270941	2	1	189	0	3013	0	2078			Red	24421 10930 5111 21254 25353
21254	RANDOM1021	RANDOM1021	Random Sequence 1021	Random	1.0399	0	175487	2	1	116	0	3013	0	2078			Red	24421 10930 5111 39798 25353
25353	RANDOM5120	RANDOM5120	Random Sequence 5120	Random	1.0399	0	521387	2	1	365	0	3013	0	2078			Red	24421 10930 5111 39798 21254
24473	RANDOM4240	RANDOM4240	Random Sequence 4240	Random	0.5802	0	407244	1	1	293	0	2219	0	1038			Red	13230
