# Supplementary material for: Targeting Hodgkin and Reed–Sternberg Cells with an Inhibitor of Heat-Shock Protein 90: Molecular Pathways of Response and Potential Mechanisms of Resistance
Source: Int J Mol Sci. 2018 Mar 13;19(3):836. doi: 10.3390/ijms19030836 (PMC5877697; doi:10.3390/ijms19030836)
Supplement: Supplementary file 1 [file ijms-19-00836-s001.zip › Supplementary Table S2.xlsx]

## Sheet: 20140319_KHM2_T_1_2D58MIN_01_IA
protein.key	protein.Entry	protein.Accession	protein.Description	protein.dataBaseType	protein.score	protein.falsePositiveRate	protein.avgMass	protein.MatchedProducts	protein.matchedPeptides	protein.digestPeps	protein.seqCover(%)	protein.MatchedPeptideIntenSum	protein.top3MatchedPeptideIntenSum	protein.MatchedProductIntenSum	protein.fmolOnColumn	protein.ngramOnColumn	protein.AutoCurate	protein.Key_ForHomologs
389	P63261	ACTG_HUMAN	Actin cytoplasmic 2 OS Homo sapiens GN ACTG1 PE 1 SV 1	Regular	60393	0	42135.1	339	21	34	69.07	7786221	0	2435342			Green	13466 388 387 13462
387	P60709	ACTB_HUMAN	Actin cytoplasmic 1 OS Homo sapiens GN ACTB PE 1 SV 1	Regular	60393	0	42079	343	22	34	73.6	7784747	2533366	2438685	579.019	24.3645	Green	13466 389 388 13462
5431	P06733	ENOA_HUMAN	Alpha enolase OS Homo sapiens GN ENO1 PE 1 SV 2	Regular	48673	0	47511.2	277	26	31	65.21	3597157	1071848	1183666	244.978	11.6392	Green	5434 5432
7876	P07900	HS90A_HUMAN	Heat shock protein HSP 90 alpha OS Homo sapiens GN HSP90AA1 PE 1 SV 5	Regular	46504.2	0	85059.1	553	54	92	69.4	8011554	963791	2369711	220.281	18.7369	Green	6739 7516 7877
6615	P04406	G3P_HUMAN	Glyceraldehyde 3 phosphate dehydrogenase OS Homo sapiens GN GAPDH PE 1 SV 3	Regular	46266.1	0	36224.4	215	16	21	65.67	3290126	1377188	1244157	314.766	11.4022	Green
13712	P07737	PROF1_HUMAN	Profilin 1 OS Homo sapiens GN PFN1 PE 1 SV 2	Regular	44447.3	0	15225.3	105	10	16	73.57	1547202	1020244	434326	233.184	3.5503	Green
3625	P23528	COF1_HUMAN	Cofilin 1 OS Homo sapiens GN CFL1 PE 1 SV 3	Regular	42447.6	0	18730.6	121	11	19	59.64	1128822	538496	318567	123.077	2.3053	Green
9183	P14618	KPYM_HUMAN	Pyruvate kinase isozymes M1 M2 OS Homo sapiens GN PKM PE 1 SV 4	Regular	41664.6	0	58507.3	421	36	43	72.32	4717642	1035832	1539946	236.747	13.8514	Green	9184
7877	P08238	HS90B_HUMAN	Heat shock protein HSP 90 beta OS Homo sapiens GN HSP90AB1 PE 1 SV 4	Regular	40884.2	0	83606.5	424	42	67	61.6	6264559	694512	1935930	158.736	13.2713	Green	5439 7516 6739 7876
14699	P62987	RL40_HUMAN	Ubiquitin 60S ribosomal protein L40 OS Homo sapiens GN UBA52 PE 1 SV 2	Regular	34292.9	0	15013.5	74	6	9	41.41	1419894	1025835	477457	234.462	3.5201	Green
7899	P11142	HSP7C_HUMAN	Heat shock cognate 71 kDa protein OS Homo sapiens GN HSPA8 PE 1 SV 1	Regular	30894.1	0	71126.3	388	35	50	60.99	4328527	630683	1299762	144.147	10.2527	Green	7349 7894 7871 7895 7348 7897
17921	P60174	TPIS_HUMAN	Triosephosphate isomerase OS Homo sapiens GN TPI1 PE 1 SV 3	Regular	30031.3	0	31076.2	189	18	26	69.93	1430653	458168	527087	104.718	3.2542	Green
388	P68032	ACTC_HUMAN	Actin alpha cardiac muscle 1 OS Homo sapiens GN ACTC1 PE 1 SV 1	Regular	26565.5	0	42361.2	181	14	34	38.99	4651130	1863581	1367307	425.935	18.0431	Green	13466 389 387 13462
5226	P68104	EF1A1_HUMAN	Elongation factor 1 alpha 1 OS Homo sapiens GN EEF1A1 PE 1 SV 1	Regular	25176.8	0	50483.1	224	18	32	56.28	2579886	877826	671708	200.633	10.1286	Green	5227
12997	P18669	PGAM1_HUMAN	Phosphoglycerate mutase 1 OS Homo sapiens GN PGAM1 PE 1 SV 2	Regular	24577	0	28918	139	13	20	53.94	792883	342921	250241	78.377	2.2665	Green	12998
7894	P08107	HSP71_HUMAN	Heat shock 70 kDa protein 1A 1B OS Homo sapiens GN HSPA1A PE 1 SV 5	Regular	23409.5	0	70337.5	330	34	49	62.4	2754984	421503	861187	96.3376	6.7761	Green	7349 7899 7871 7895 7897
13526	P62937	PPIA_HUMAN	Peptidyl prolyl cis trans isomerase A OS Homo sapiens GN PPIA PE 1 SV 2	Regular	23333.8	0	18240.6	110	12	12	58.79	1718703	733258	440794	167.591	3.057	Green	14304 10958
9510	P07195	LDHB_HUMAN	L lactate dehydrogenase B chain OS Homo sapiens GN LDHB PE 1 SV 2	Regular	23200.5	0	36923.7	146	16	25	47.9	1684934	485772	410406	111.027	4.0995	Green	9511 9509 33316 9507
0	P00330	ADH1_YEAST	Alcohol dehydrogenase 1 OS Saccharomyces cerevisiae strain ATCC 204508 S288c GN ADH1 PE 1 SV 5	Regular	23099.9	0	37305.4	156	17	25	47.7	2292499	875055	630263	200	7.4611	Green
9509	P00338	LDHA_HUMAN	L lactate dehydrogenase A chain OS Homo sapiens GN LDHA PE 1 SV 2	Regular	21828	0	36973.9	173	23	31	67.17	1625080	373532	363168	85.3734	3.1566	Green	9510 9511 33316 9507
13668	Q06830	PRDX1_HUMAN	Peroxiredoxin 1 OS Homo sapiens GN PRDX1 PE 1 SV 1	Regular	19379.1	0	22338.5	134	15	18	76.88	1460462	532391	376567	121.682	2.7182	Green	13671
7516	Q58FF8	H90B2_HUMAN	Putative heat shock protein HSP 90 beta 2 OS Homo sapiens GN HSP90AB2P PE 1 SV 2	Regular	18686	0	44520.1	134	17	44	38.32	2413592	357742	592925	81.7644	3.6402	Green	5439 8408 7877 7876 7599 16796
13462	Q6S8J3	POTEE_HUMAN	POTE ankyrin domain family member E OS Homo sapiens GN POTEE PE 1 SV 3	Regular	17401.4	0	122961	125	14	100	14.05	3263487	470576	845837	107.553	13.2248	Green	13466 389 388 387
17082	P07437	TBB5_HUMAN	Tubulin beta chain OS Homo sapiens GN TUBB PE 1 SV 2	Regular	17235.2	0	50127.2	172	17	30	56.53	1058126	263898	324012	60.3157	3.0235	Green	17085 17078 17081
13020	P00558	PGK1_HUMAN	Phosphoglycerate kinase 1 OS Homo sapiens GN PGK1 PE 1 SV 3	Regular	17222	0	45014	199	20	33	58.03	1425191	453319	402586	103.609	4.6639	Green
11230	P22392	NDKB_HUMAN	Nucleoside diphosphate kinase B OS Homo sapiens GN NME2 PE 1 SV 1	Regular	17110.2	0	17412.1	77	10	14	56.58	808095	310490	171950	70.9646	1.2356	Green	11229
14184	P62826	RAN_HUMAN	GTP binding nuclear protein Ran OS Homo sapiens GN RAN PE 1 SV 3	Regular	17024.1	0	24594.2	96	12	17	50.46	945521	363728	229754	83.1326	2.0446	Green
7901	P04792	HSPB1_HUMAN	Heat shock protein beta 1 OS Homo sapiens GN HSPB1 PE 1 SV 2	Regular	16349.7	0	22839.6	93	11	15	81.46	620690	331651	210326	75.8012	1.7313	Green
17078	Q9BVA1	TBB2B_HUMAN	Tubulin beta 2B chain OS Homo sapiens GN TUBB2B PE 1 SV 1	Regular	16041.3	0	50409.4	154	15	30	49.66	860797	152848	232968	34.9345	1.761	Green	17082 17085 17081
3	P62258	1433E_HUMAN	14 3 3 protein epsilon OS Homo sapiens GN YWHAE PE 1 SV 1	Regular	15668.1	0	29345	89	11	29	44.31	717502	231755	168880	52.9693	1.5544	Green	2 5 7 8
661	P04075	ALDOA_HUMAN	Fructose bisphosphate aldolase A OS Homo sapiens GN ALDOA PE 1 SV 2	Regular	15473.9	0	39876.3	177	22	31	83.24	1447920	388930	398661	88.8927	3.5447	Green	663 662
12669	Q99497	PARK7_HUMAN	Protein DJ 1 OS Homo sapiens GN PARK7 PE 1 SV 2	Regular	15251.7	0	20062.2	86	9	27	49.74	541956	272771	188789	62.3437	1.2508	Green
17081	P68371	TBB4B_HUMAN	Tubulin beta 4B chain OS Homo sapiens GN TUBB4B PE 1 SV 1	Regular	14017.6	0	50287.4	143	16	30	55.96	775697	51797.8	232108	11.8387	0.5953	Green	17082 17085 17078
13673	P30041	PRDX6_HUMAN	Peroxiredoxin 6 OS Homo sapiens GN PRDX6 PE 1 SV 3	Regular	13798.5	0	25149.1	86	15	28	67.41	487418	175526	115771	40.1177	1.0089	Green
5434	P09104	ENOG_HUMAN	Gamma enolase OS Homo sapiens GN ENO2 PE 1 SV 3	Regular	13459	0	47610.8	80	14	30	46.54	779577	88187.2	330693	20.1558	0.9596	Green	5432 5431
13918	P06454	PTMA_HUMAN	Prothymosin alpha OS Homo sapiens GN PTMA PE 1 SV 2	Regular	13427.3	0	12203	46	5	10	23.42	324039	306278	58151	70.002	0.8542	Green
7871	P34931	HS71L_HUMAN	Heat shock 70 kDa protein 1 like OS Homo sapiens GN HSPA1L PE 1 SV 2	Regular	13371.9	0	70774.3	159	20	48	30.58	1682450	149728	489575	34.2213	2.422	Green	7349 7899 7895 7894 7897
7895	P54652	HSP72_HUMAN	Heat shock related 70 kDa protein 2 OS Homo sapiens GN HSPA2 PE 1 SV 1	Regular	13348.9	0	70306.2	159	18	50	23.94	1927279	30700.5	511718	7.0168	0.4933	Green	7349 7899 7871 7348 7897 7894
5432	P13929	ENOB_HUMAN	Beta enolase OS Homo sapiens GN ENO3 PE 1 SV 4	Regular	13263	0	47274	61	8	28	20.28	915914	5677.89	374102	1.2977	0.0613	Green	5434 5431
17028	P37802	TAGL2_HUMAN	Transgelin 2 OS Homo sapiens GN TAGLN2 PE 1 SV 3	Regular	12732.3	0	22562.6	82	12	25	72.36	593611	247361	141426	56.5361	1.2756	Green
17067	P68363	TBA1B_HUMAN	Tubulin alpha 1B chain OS Homo sapiens GN TUBA1B PE 1 SV 1	Regular	12678.5	0	50836	125	18	34	54.1	1109665	432402	325137	98.8285	5.0241	Green	17074 17072
12998	P15259	PGAM2_HUMAN	Phosphoglycerate mutase 2 OS Homo sapiens GN PGAM2 PE 1 SV 3	Regular	12503.9	0	28937.3	61	8	20	35.97	308160	15364	93074	3.5116	0.1016	Green	12997
17275	P55072	TERA_HUMAN	Transitional endoplasmic reticulum ATPase OS Homo sapiens GN VCP PE 1 SV 4	Regular	12147.3	0	90006.3	301	40	69	56.7	1239313	218289	366235	49.8915	4.4905	Green	11792 13788 16350 942
10490	P14174	MIF_HUMAN	Macrophage migration inhibitory factor OS Homo sapiens GN MIF PE 1 SV 4	Regular	11879.2	0	12647.4	27	3	6	65.22	484848	484848	133313	110.815	1.4015	Green
13342	P13796	PLSL_HUMAN	Plastin 2 OS Homo sapiens GN LCP1 PE 1 SV 6	Regular	11678.4	0	70858.8	252	35	54	70.02	1408074	245823	388860	56.1846	3.9812	Green	13343 13341
2083	P62158	CALM_HUMAN	Calmodulin OS Homo sapiens GN CALM1 PE 1 SV 2	Regular	11406.8	0	16837.7	54	7	23	47.65	386613	268946	137861	61.4695	1.035	Green
7	P27348	1433T_HUMAN	14 3 3 protein theta OS Homo sapiens GN YWHAQ PE 1 SV 1	Regular	11191.5	0	28049.4	98	13	24	52.24	762997	178001	175208	40.6834	1.1411	Green	2 3 5 8
13466	P0CG38	POTEI_HUMAN	POTE ankyrin domain family member I OS Homo sapiens GN POTEI PE 3 SV 1	Regular	10182.8	0	122936	92	14	99	13.12	2380962	282209	481772	64.5009	7.9295	Green	389 388 387 13462
14887	P09651	ROA1_HUMAN	Heterogeneous nuclear ribonucleoprotein A1 OS Homo sapiens GN HNRNPA1 PE 1 SV 5	Regular	9668.05	0	38860.8	118	14	29	40.86	710248	325136	183058	74.3121	2.8878	Green	14889
11229	P15531	NDKA_HUMAN	Nucleoside diphosphate kinase A OS Homo sapiens GN NME1 PE 1 SV 1	Regular	9580.95	0	17319.8	59	9	15	55.92	560243	185483	123299	42.3936	0.7342	Green	11230
18431	P68036	UB2L3_HUMAN	Ubiquitin conjugating enzyme E2 L3 OS Homo sapiens GN UBE2L3 PE 1 SV 1	Regular	9470.86	0	18032.7	49	6	12	50.65	209094	160013	50419	36.5721	0.6595	Green
8	P63104	1433Z_HUMAN	14 3 3 protein zeta delta OS Homo sapiens GN YWHAZ PE 1 SV 1	Regular	9439.23	0	27916.2	95	15	25	55.92	722444	124522	180232	28.4604	0.7945	Green	2 3 5 7
5227	Q05639	EF1A2_HUMAN	Elongation factor 1 alpha 2 OS Homo sapiens GN EEF1A2 PE 1 SV 1	Regular	9301.03	0	50812.4	117	14	32	48.16	1299363	109187	287526	24.9556	1.2681	Green	5226
15076	P08865	RSSA_HUMAN	40S ribosomal protein SA OS Homo sapiens GN RPSA PE 1 SV 4	Regular	8763.02	0	32968.2	73	8	25	37.97	329390	176418	129912	40.3216	1.3293	Green
16214	P00441	SODC_HUMAN	Superoxide dismutase Cu Zn OS Homo sapiens GN SOD1 PE 1 SV 2	Regular	8587.65	0	16163.9	60	8	13	66.23	427441	189445	99611	43.299	0.6999	Green
15742	Q01105	SET_HUMAN	Protein SET OS Homo sapiens GN SET PE 1 SV 3	Regular	8496.54	0	33488.9	55	6	17	25.52	325592	217541	101959	49.7205	1.6651	Green
7395	P09211	GSTP1_HUMAN	Glutathione S transferase P OS Homo sapiens GN GSTP1 PE 1 SV 2	Regular	8486.57	0	23584	58	7	15	40.48	435968	285663	123095	65.2903	1.5398	Green
7491	Q93079	H2B1H_HUMAN	Histone H2B type 1 H OS Homo sapiens GN HIST1H2BH PE 1 SV 3	Regular	8445.46	0	13892.1	37	5	11	41.27	282661	218157	58024	49.8613	0.6927	Green
7897	P17066	HSP76_HUMAN	Heat shock 70 kDa protein 6 OS Homo sapiens GN HSPA6 PE 1 SV 2	Regular	8203.02	0	71484.5	106	16	56	27.99	1102537	23777.7	381912	5.4346	0.3885	Green	7899 7871 7895 7894
12810	P12004	PCNA_HUMAN	Proliferating cell nuclear antigen OS Homo sapiens GN PCNA PE 1 SV 1	Regular	7884.2	0	29111	76	12	23	49.04	342814	156011	115853	35.6574	1.038	Green
5307	P41567	EIF1_HUMAN	Eukaryotic translation initiation factor 1 OS Homo sapiens GN EIF1 PE 1 SV 1	Regular	7808.69	0	12846.6	23	4	9	51.33	56665	52118	28753	11.9119	0.153	Green
17398	P10599	THIO_HUMAN	Thioredoxin OS Homo sapiens GN TXN PE 1 SV 3	Regular	7769.85	0	12022.7	20	2	9	20.95	218635	325438	75498	74.3813	0.8943	Green
10086	P43358	MAGA4_HUMAN	Melanoma associated antigen 4 OS Homo sapiens GN MAGEA4 PE 1 SV 2	Regular	7736.14	0	35127.4	109	13	21	38.8	916160	400116	267450	91.4493	3.2124	Green	10103 10090 10091
7802	P61978	HNRPK_HUMAN	Heterogeneous nuclear ribonucleoprotein K OS Homo sapiens GN HNRNPK PE 1 SV 1	Regular	7667.47	0	51261.5	122	17	38	45.79	683292	192655	196734	44.0327	2.2572	Green
17238	Q15185	TEBP_HUMAN	Prostaglandin E synthase 3 OS Homo sapiens GN PTGES3 PE 1 SV 1	Regular	7595.21	0	18982.6	61	8	15	60	370947	251347	96191	57.4471	1.0905	Green
7472	Q96KK5	H2A1H_HUMAN	Histone H2A type 1 H OS Homo sapiens GN HIST1H2AH PE 1 SV 3	Regular	7589.45	0	13906.3	25	3	7	27.34	263632	203898	65447	46.6023	0.6481	Green	7486
5234	P13639	EF2_HUMAN	Elongation factor 2 OS Homo sapiens GN EEF2 PE 1 SV 4	Regular	7358.2	0	96307.8	301	42	69	54.66	1720775	295790	442713	67.6049	6.5109	Green	18406
12929	P30086	PEBP1_HUMAN	Phosphatidylethanolamine binding protein 1 OS Homo sapiens GN PEBP1 PE 1 SV 3	Regular	7324.09	0	21170.9	66	9	13	66.84	246212	137857	86032	31.5082	0.6671	Green
16669	P16949	STMN1_HUMAN	Stathmin OS Homo sapiens GN STMN1 PE 1 SV 3	Regular	7271.43	0	17302.5	52	8	24	40.94	333537	196147	72553	44.8308	0.7757	Green
752	P39687	AN32A_HUMAN	Acidic leucine rich nuclear phosphoprotein 32 family member A OS Homo sapiens GN ANP32A PE 1 SV 1	Regular	7080.44	0	28699.5	62	10	15	36.95	430014	154415	109825	35.2926	1.0129	Green	753 754
7349	P11021	GRP78_HUMAN	78 kDa glucose regulated protein OS Homo sapiens GN HSPA5 PE 1 SV 2	Regular	6999.4	0	72447.1	109	16	52	32.26	822891	79309.7	229701	18.1268	1.3132	Green	7899 7895 7871 7894
753	Q92688	AN32B_HUMAN	Acidic leucine rich nuclear phosphoprotein 32 family member B OS Homo sapiens GN ANP32B PE 1 SV 1	Regular	6785.9	0	28958.8	64	11	14	33.86	467313	179082	120617	40.9304	1.1853	Green	14032 752
16739	Q6EEV6	SUMO4_HUMAN	Small ubiquitin related modifier 4 OS Homo sapiens GN SUMO4 PE 1 SV 2	Regular	6534.65	0	10742.2	14	1	5	12.63	69938	197211	19504	45.074	0.4842	Green
574	O95433	AHSA1_HUMAN	Activator of 90 kDa heat shock protein ATPase homolog 1 OS Homo sapiens GN AHSA1 PE 1 SV 1	Regular	6404.08	0	38445.5	71	11	29	38.17	293647	141839	64679	32.4183	1.2463	Green
8440	Q15181	IPYR_HUMAN	Inorganic pyrophosphatase OS Homo sapiens GN PPA1 PE 1 SV 2	Regular	6345.02	0	33116.3	90	14	26	59.17	497007	177378	147542	40.541	1.3426	Green
11750	P61970	NTF2_HUMAN	Nuclear transport factor 2 OS Homo sapiens GN NUTF2 PE 1 SV 1	Regular	6304.15	0	14649.6	34	5	8	56.69	238503	177543	38402	40.5787	0.5945	Green
6838	P52565	GDIR1_HUMAN	Rho GDP dissociation inhibitor 1 OS Homo sapiens GN ARHGDIA PE 1 SV 3	Regular	6223.58	0	23264.2	34	5	17	28.92	166680	131848	44521	30.1348	0.7011	Green
18441	P22314	UBA1_HUMAN	Ubiquitin like modifier activating enzyme 1 OS Homo sapiens GN UBA1 PE 1 SV 3	Regular	6156.8	0	118933	197	26	68	36.96	738630	194716	244317	44.5037	5.2929	Green
2	P31946	1433B_HUMAN	14 3 3 protein beta alpha OS Homo sapiens GN YWHAB PE 1 SV 3	Regular	5719.76	0	28196.5	57	10	22	50.81	569764	96146	134123	21.9749	0.6196	Green	3 5 7 8
18462	P61088	UBE2N_HUMAN	Ubiquitin conjugating enzyme E2 N OS Homo sapiens GN UBE2N PE 1 SV 1	Regular	5628.14	0	17194.9	42	6	13	43.42	165103	112577	42261	25.7303	0.4424	Green	18602
5229	P24534	EF1B_HUMAN	Elongation factor 1 beta OS Homo sapiens GN EEF1B2 PE 1 SV 3	Regular	5602.27	0	24934.8	63	10	19	52.89	410715	179247	105451	40.9682	1.0215	Green
5	P61981	1433G_HUMAN	14 3 3 protein gamma OS Homo sapiens GN YWHAG PE 1 SV 2	Regular	5514.43	0	28473.7	57	9	25	48.58	476688	59884.5	114998	13.687	0.3897	Green	2 3 7 8
17085	Q3ZCM7	TBB8_HUMAN	Tubulin beta 8 chain OS Homo sapiens GN TUBB8 PE 1 SV 2	Regular	5316.51	0	50289.4	54	6	30	18.02	228863	51237.5	75435	11.7107	0.5889	Green	17082 17078 17081
6518	Q16658	FSCN1_HUMAN	Fascin OS Homo sapiens GN FSCN1 PE 1 SV 3	Regular	5289.94	0	55157.3	151	18	42	46.86	765799	236419	192565	54.0352	2.9804	Green
5094	P33316	DUT_HUMAN	Deoxyuridine 5 triphosphate nucleotidohydrolase mitochondrial OS Homo sapiens GN DUT PE 1 SV 4	Regular	5101.07	0	26848.4	44	7	18	40.48	116788	94263	58789	21.5445	0.5784	Green
1029	P84077	ARF1_HUMAN	ADP ribosylation factor 1 OS Homo sapiens GN ARF1 PE 1 SV 2	Regular	4859.78	0	20753.8	44	8	14	49.72	161627	84492	43538	19.3112	0.4008	Green	1030
1030	P61204	ARF3_HUMAN	ADP ribosylation factor 3 OS Homo sapiens GN ARF3 PE 1 SV 2	Regular	4859.78	0	20657.8	44	8	14	49.72	161627	0	43538			Green	1029
14888	P22626	ROA2_HUMAN	Heterogeneous nuclear ribonucleoproteins A2 B1 OS Homo sapiens GN HNRNPA2B1 PE 1 SV 2	Regular	4745.69	0	37486.8	81	15	29	39.94	693191	287495	133674	65.709	2.4632	Green
6059	Q01469	FABP5_HUMAN	Fatty acid binding protein epidermal OS Homo sapiens GN FABP5 PE 1 SV 3	Regular	4598.51	0	15506.6	46	9	14	65.19	237934	125130	56759	28.5994	0.4435	Green
10297	P40925	MDHC_HUMAN	Malate dehydrogenase cytoplasmic OS Homo sapiens GN MDH1 PE 1 SV 4	Regular	4406.24	0	36654.3	56	9	34	29.34	319303	167528	78032	38.2897	1.4035	Green
15022	P62249	RS16_HUMAN	40S ribosomal protein S16 OS Homo sapiens GN RPS16 PE 1 SV 2	Regular	4367.76	0	16559.4	31	7	18	36.3	148916	93179	31159	21.2967	0.3527	Green
2086	P27797	CALR_HUMAN	Calreticulin OS Homo sapiens GN CALR PE 1 SV 1	Regular	4050.62	0	48312.7	69	11	47	30.22	327392	160719	76462	36.7335	1.7747	Green
7807	Q00839	HNRPU_HUMAN	Heterogeneous nuclear ribonucleoprotein U OS Homo sapiens GN HNRNPU PE 1 SV 6	Regular	3917.88	0	91325.9	144	27	55	28.97	995006	396149	264967	90.5427	8.2689	Green
14183	P43487	RANG_HUMAN	Ran specific GTPase activating protein OS Homo sapiens GN RANBP1 PE 1 SV 1	Regular	3873.23	0	23481.2	42	7	14	57.71	261485	153932	65183	35.1823	0.8261	Green
5439	P14625	ENPL_HUMAN	Endoplasmin OS Homo sapiens GN HSP90B1 PE 1 SV 1	Regular	3835.86	0	92754.2	102	20	82	27.52	544829	120527	136929	27.5474	2.5551	Green	7516 5438 7877
8129	P60842	IF4A1_HUMAN	Eukaryotic initiation factor 4A I OS Homo sapiens GN EIF4A1 PE 1 SV 1	Regular	3820.09	0	46382.2	93	19	46	46.31	501973	157847	105353	36.0771	1.6733	Green	8131
14712	P05387	RLA2_HUMAN	60S acidic ribosomal protein P2 OS Homo sapiens GN RPLP2 PE 1 SV 1	Regular	3777.77	0	11665	32	5	9	70.43	135751	96205	44165	21.9883	0.2565	Green
6753	P63244	GBLP_HUMAN	Guanine nucleotide binding protein subunit beta 2 like 1 OS Homo sapiens GN GNB2L1 PE 1 SV 3	Regular	3749.01	0	35533	67	13	27	58.68	273996	124017	57596	28.345	1.0072	Green
14711	P05386	RLA1_HUMAN	60S acidic ribosomal protein P1 OS Homo sapiens GN RPLP1 PE 1 SV 1	Regular	3634.1	0	11628	10	2	7	51.75	41346	62019	27520	14.1749	0.1648	Green
15037	P62857	RS28_HUMAN	40S ribosomal protein S28 OS Homo sapiens GN RPS28 PE 1 SV 1	Regular	3629.26	0	7898.07	16	2	6	30.43	64822	97233	20425	22.2233	0.1755	Green
13979	P22234	PUR6_HUMAN	Multifunctional protein ADE2 OS Homo sapiens GN PAICS PE 1 SV 3	Regular	3571.84	0	47820.6	86	18	35	45.18	382593	100000	94914	22.8557	1.093	Green
11582	P55209	NP1L1_HUMAN	Nucleosome assembly protein 1 like 1 OS Homo sapiens GN NAP1L1 PE 1 SV 1	Regular	3384.07	0	45659.3	51	9	25	31.71	313752	207795	88888	47.493	2.1685	Green	11585
881	P08758	ANXA5_HUMAN	Annexin A5 OS Homo sapiens GN ANXA5 PE 1 SV 2	Regular	3297.9	0	35993.9	72	16	29	53.13	207009	97344	61571	22.2487	0.8008	Green
17494	P29401	TKT_HUMAN	Transketolase OS Homo sapiens GN TKT PE 1 SV 3	Regular	3236.91	0	68562.1	84	15	42	29.37	367536	142700	106691	32.6151	2.2362	Green
7800	Q14103	HNRPD_HUMAN	Heterogeneous nuclear ribonucleoprotein D0 OS Homo sapiens GN HNRNPD PE 1 SV 1	Regular	3205.85	0	38605.3	61	12	24	32.11	344478	197749	92579	45.197	1.7448	Green	7792
9882	P33241	LSP1_HUMAN	Lymphocyte specific protein 1 OS Homo sapiens GN LSP1 PE 1 SV 1	Regular	3186.72	0	37419.7	52	9	26	52.8	230174	119376	72778	27.2842	1.021	Green
145	P52209	6PGD_HUMAN	6 phosphogluconate dehydrogenase decarboxylating OS Homo sapiens GN PGD PE 1 SV 3	Regular	3130.48	0	53653.3	40	7	36	17.6	185933	116208	56579	26.5602	1.425	Green
663	P09972	ALDOC_HUMAN	Fructose bisphosphate aldolase C OS Homo sapiens GN ALDOC PE 1 SV 2	Regular	3049.3	0	39855.1	45	10	33	31.32	286045	107414	116111	24.5503	0.9785	Green	662 661
13981	P31939	PUR9_HUMAN	Bifunctional purine biosynthesis protein PURH OS Homo sapiens GN ATIC PE 1 SV 3	Regular	2958.01	0	65129.2	93	22	55	43.41	340401	76543	112115	17.4944	1.1394	Green
7837	P00492	HPRT_HUMAN	Hypoxanthine guanine phosphoribosyltransferase OS Homo sapiens GN HPRT1 PE 1 SV 2	Regular	2876.12	0	24807.5	45	8	18	54.13	119770	78068	44800	17.843	0.4426	Green
5108	Q13838	DX39B_HUMAN	Spliceosome RNA helicase DDX39B OS Homo sapiens GN DDX39B PE 1 SV 1	Regular	2847.83	0	49447.7	89	16	37	44.86	358112	74118.2	80486	16.9402	0.8377	Green	5107
15027	P60866	RS20_HUMAN	40S ribosomal protein S20 OS Homo sapiens GN RPS20 PE 1 SV 1	Regular	2838.92	0	13486.8	23	4	6	31.93	109663	101552	20747	23.2104	0.313	Green
15026	P39019	RS19_HUMAN	40S ribosomal protein S19 OS Homo sapiens GN RPS19 PE 1 SV 2	Regular	2812.2	0	16060.5	30	7	17	43.45	100962	78271	33290	17.8894	0.2873	Green
11067	Q13765	NACA_HUMAN	Nascent polypeptide associated complex subunit alpha OS Homo sapiens GN NACA PE 1 SV 1	Regular	2764.58	0	23383.9	38	5	8	25.58	171178	143736	60245	32.8519	0.7682	Green
10091	P43363	MAGAA_HUMAN	Melanoma associated antigen 10 OS Homo sapiens GN MAGEA10 PE 2 SV 2	Regular	2735.99	0	41065.7	52	7	17	18.7	299509	52670.9	106747	12.0383	0.4944	Green	10103 10086 10090
4365	Q9HB71	CYBP_HUMAN	Calcyclin binding protein OS Homo sapiens GN CACYBP PE 1 SV 2	Regular	2729.78	0	26324	60	12	24	66.67	263317	122550	55116	28.0097	0.7373	Green
664	P15121	ALDR_HUMAN	Aldose reductase OS Homo sapiens GN AKR1B1 PE 1 SV 3	Regular	2729.71	0	36252.6	42	8	22	32.59	187652	97418	36857	22.2656	0.8072	Green
810	Q99873	ANM1_HUMAN	Protein arginine N methyltransferase 1 OS Homo sapiens GN PRMT1 PE 1 SV 2	Regular	2685.14	0	42085.9	67	13	31	34.35	180216	83960	68675	19.1897	0.8076	Green
13671	Q13162	PRDX4_HUMAN	Peroxiredoxin 4 OS Homo sapiens GN PRDX4 PE 1 SV 1	Regular	2667.48	0	30768	23	5	20	22.14	206126	10560.8	73572	2.4138	0.0743	Green	13668
12558	Q9UQ80	PA2G4_HUMAN	Proliferation associated protein 2G4 OS Homo sapiens GN PA2G4 PE 1 SV 3	Regular	2590.88	0	44129.1	63	17	32	44.67	327665	113293	68831	25.8939	1.1427	Green
5232	P26641	EF1G_HUMAN	Elongation factor 1 gamma OS Homo sapiens GN EEF1G PE 1 SV 3	Regular	2560.52	0	50461	98	14	37	34.1	628441	187228	122999	42.7923	2.1593	Green
17110	O75347	TBCA_HUMAN	Tubulin specific chaperone A OS Homo sapiens GN TBCA PE 1 SV 3	Regular	2559.54	0	12911.9	29	6	12	26.85	84616	62259	19657	14.2297	0.1837	Green
992	P07741	APT_HUMAN	Adenine phosphoribosyltransferase OS Homo sapiens GN APRT PE 1 SV 2	Regular	2559.14	0	19778.9	26	7	18	41.67	121983	94245	21410	21.5404	0.426	Green
13822	P20618	PSB1_HUMAN	Proteasome subunit beta type 1 OS Homo sapiens GN PSMB1 PE 1 SV 2	Regular	2523.38	0	26717.5	33	10	26	39.83	115747	62036	25753	14.1788	0.3788	Green
4383	P04080	CYTB_HUMAN	Cystatin B OS Homo sapiens GN CSTB PE 1 SV 2	Regular	2486.88	0	11196.6	15	3	7	45.92	79878	79878	14316	18.2567	0.2044	Green
15042	P23396	RS3_HUMAN	40S ribosomal protein S3 OS Homo sapiens GN RPS3 PE 1 SV 2	Regular	2473.3	0	26859.4	55	13	26	42.8	300757	104663	60338	23.9215	0.6425	Green	10996 18823 2128
13672	P30044	PRDX5_HUMAN	Peroxiredoxin 5 mitochondrial OS Homo sapiens GN PRDX5 PE 1 SV 4	Regular	2386.61	0	22314.6	35	8	18	54.21	120816	65571	27478	14.9867	0.3344	Green
9507	Q6ZMR3	LDH6A_HUMAN	L lactate dehydrogenase A like 6A OS Homo sapiens GN LDHAL6A PE 2 SV 1	Regular	2337.95	0	36849.6	27	7	24	18.98	360905	15346.2	93825	3.5075	0.1292	Green	9510 9511 9509
5107	O00148	DX39A_HUMAN	ATP dependent RNA helicase DDX39A OS Homo sapiens GN DDX39A PE 1 SV 2	Regular	2337.94	0	49642.9	72	12	37	32.55	329421	48992.8	70853	11.1977	0.5559	Green	5108
19126	P12956	XRCC6_HUMAN	X ray repair cross complementing protein 6 OS Homo sapiens GN XRCC6 PE 1 SV 2	Regular	2323.22	0	70128.3	88	19	56	33.33	339675	101441	82321	23.1851	1.6259	Green
950	P27695	APEX1_HUMAN	DNA apurinic or apyrimidinic site lyase OS Homo sapiens GN APEX1 PE 1 SV 2	Regular	2289.34	0	35953.7	41	11	21	45.91	128104	72469	31226	16.5633	0.5955	Green
6240	P39748	FEN1_HUMAN	Flap endonuclease 1 OS Homo sapiens GN FEN1 PE 1 SV 1	Regular	2227.44	0	42935.2	49	11	26	32.37	185875	109684	56009	25.0691	1.0763	Green
7750	P26583	HMGB2_HUMAN	High mobility group protein B2 OS Homo sapiens GN HMGB2 PE 1 SV 2	Regular	2224.14	0	24204.9	54	12	17	40.67	353610	144558	64386	33.0397	0.7997	Green	7749
17204	P50990	TCPQ_HUMAN	T complex protein 1 subunit theta OS Homo sapiens GN CCT8 PE 1 SV 4	Regular	2197.7	0	60191	88	21	52	43.98	368444	85806	90549	19.6116	1.1804	Green
16650	P31948	STIP1_HUMAN	Stress induced phosphoprotein 1 OS Homo sapiens GN STIP1 PE 1 SV 1	Regular	2194.38	0	63266.7	74	25	64	47.88	307637	105698	101322	24.158	1.5284	Green
13814	P28066	PSA5_HUMAN	Proteasome subunit alpha type 5 OS Homo sapiens GN PSMA5 PE 1 SV 3	Regular	2161.51	0	26582.2	14	3	16	19.92	53760	52969	11392	12.1064	0.3218	Green
16779	P49588	SYAC_HUMAN	Alanine tRNA ligase cytoplasmic OS Homo sapiens GN AARS PE 1 SV 2	Regular	2154.65	0	107552	111	26	82	34.3	457531	120884	122360	27.6289	2.9715	Green
12719	Q15365	PCBP1_HUMAN	Poly rC binding protein 1 OS Homo sapiens GN PCBP1 PE 1 SV 2	Regular	2127.2	0	38011.1	34	7	24	33.71	212957	149944	73922	34.2708	1.3027	Green	12720
17198	P50991	TCPD_HUMAN	T complex protein 1 subunit delta OS Homo sapiens GN CCT4 PE 1 SV 4	Regular	2107.77	0	58437.6	67	14	42	35.62	183239	79248	58246	18.1127	1.0585	Green
3371	O00299	CLIC1_HUMAN	Chloride intracellular channel protein 1 OS Homo sapiens GN CLIC1 PE 1 SV 4	Regular	2103.32	0	27264.9	48	11	20	59.75	169058	72834	61757	16.6467	0.4539	Green
756	Q9BTT0	AN32E_HUMAN	Acidic leucine rich nuclear phosphoprotein 32 family member E OS Homo sapiens GN ANP32E PE 1 SV 1	Regular	2081.73	0	30920.6	29	5	11	22.01	68202	65119.5	23669	14.8835	0.4602	Green
17072	Q9H853	TBA4B_HUMAN	Putative tubulin like protein alpha 4B OS Homo sapiens GN TUBA4B PE 5 SV 2	Regular	2073.51	0	27836.4	24	4	17	23.24	188964	149641	43976	34.2014	0.952	Green	17067
9511	P07864	LDHC_HUMAN	L lactate dehydrogenase C chain OS Homo sapiens GN LDHC PE 2 SV 4	Regular	2069.44	0	36653.5	22	5	27	12.35	807566	709821	143303	162.234	5.9465	Green	9510 9509 9507
15048	P62081	RS7_HUMAN	40S ribosomal protein S7 OS Homo sapiens GN RPS7 PE 1 SV 1	Regular	2060.87	0	22126.9	21	4	21	25.26	64800	59953	13865	13.7027	0.3032	Green
6837	P50395	GDIB_HUMAN	Rab GDP dissociation inhibitor beta OS Homo sapiens GN GDI2 PE 1 SV 2	Regular	2014.97	0	51119.6	52	13	42	37.53	172074	68789	54763	15.7222	0.8037	Green	6836
9184	P30613	KPYR_HUMAN	Pyruvate kinase isozymes R L OS Homo sapiens GN PKLR PE 1 SV 2	Regular	1959.38	0	62229.5	27	6	47	8.54	393285	20693.1	116715	4.7296	0.2943	Green	9183
2115	Q01518	CAP1_HUMAN	Adenylyl cyclase associated protein 1 OS Homo sapiens GN CAP1 PE 1 SV 5	Regular	1941.07	0	52357.8	65	16	44	39.37	224835	76047	66435	17.3811	0.91	Green
15025	P62269	RS18_HUMAN	40S ribosomal protein S18 OS Homo sapiens GN RPS18 PE 1 SV 3	Regular	1936.05	0	17718.7	28	8	16	48.03	85111	61327	22940	14.0167	0.2484	Green
12720	Q15366	PCBP2_HUMAN	Poly rC binding protein 2 OS Homo sapiens GN PCBP2 PE 1 SV 1	Regular	1899	0	38979.4	26	5	24	20.27	150586	83129	46016	18.9997	0.7406	Green	12719
14710	P05388	RLA0_HUMAN	60S acidic ribosomal protein P0 OS Homo sapiens GN RPLP0 PE 1 SV 1	Regular	1861.92	0	34444.7	21	8	20	35.02	37043	22508	21307	5.1444	0.1772	Green
8317	Q12905	ILF2_HUMAN	Interleukin enhancer binding factor 2 OS Homo sapiens GN ILF2 PE 1 SV 2	Regular	1814.89	0	43290.3	33	9	26	29.49	132486	75140	36646	17.1738	0.7435	Green
13343	P13797	PLST_HUMAN	Plastin 3 OS Homo sapiens GN PLS3 PE 1 SV 4	Regular	1792.18	0	71324.4	64	14	56	20.16	330442	13727	120510	3.1374	0.2238	Green	13341 13342
10090	P43362	MAGA9_HUMAN	Melanoma associated antigen 9 OS Homo sapiens GN MAGEA9 PE 2 SV 1	Regular	1754.92	0	35316.5	35	5	21	19.37	117469	20194	59252	4.6155	0.163	Green	10086 10091
17035	P37837	TALDO_HUMAN	Transaldolase OS Homo sapiens GN TALDO1 PE 1 SV 2	Regular	1707.71	0	37711.3	33	9	29	27.89	140879	87038	29451	19.8932	0.7502	Green
11807	Q9Y266	NUDC_HUMAN	Nuclear migration protein nudC OS Homo sapiens GN NUDC PE 1 SV 1	Regular	1697.91	0	38300	40	8	31	29	131957	88807	27781	20.2975	0.7774	Green
18602	Q5JXB2	UE2NL_HUMAN	Putative ubiquitin conjugating enzyme E2 N like OS Homo sapiens GN UBE2NL PE 1 SV 1	Regular	1638.9	0	17377	23	6	17	38.56	117561	0	30162			Green	18462
9377	Q16719	KYNU_HUMAN	Kynureninase OS Homo sapiens GN KYNU PE 1 SV 1	Regular	1618.29	0	52864.9	59	13	41	29.03	172153	56844	36195	12.9921	0.6868	Green
6345	Q02790	FKBP4_HUMAN	Peptidyl prolyl cis trans isomerase FKBP4 OS Homo sapiens GN FKBP4 PE 1 SV 3	Regular	1614.27	0	52089.8	67	17	40	48.8	169367	77617	57223	17.7399	0.9241	Green
14330	Q9P258	RCC2_HUMAN	Protein RCC2 OS Homo sapiens GN RCC2 PE 1 SV 2	Regular	1568.81	0	56826	72	14	44	32.18	261017	90585	79679	20.7038	1.1765	Green
8103	Q13907	IDI1_HUMAN	Isopentenyl diphosphate Delta isomerase 1 OS Homo sapiens GN IDI1 PE 1 SV 2	Regular	1559.37	0	26661.4	16	3	19	14.54	29250	28227	18639	6.4515	0.172	Green
754	O43423	AN32C_HUMAN	Acidic leucine rich nuclear phosphoprotein 32 family member C OS Homo sapiens GN ANP32C PE 2 SV 1	Regular	1555.13	0	26933	21	5	10	20.09	92733	16109.5	16990	3.6819	0.0992	Green	752
13810	P25786	PSA1_HUMAN	Proteasome subunit alpha type 1 OS Homo sapiens GN PSMA1 PE 1 SV 1	Regular	1545.97	0	29840.8	39	11	25	44.87	120225	61510	37039	14.0586	0.4195	Green
10298	P40926	MDHM_HUMAN	Malate dehydrogenase mitochondrial OS Homo sapiens GN MDH2 PE 1 SV 3	Regular	1525.93	0	35959.6	29	10	28	35.21	100263	50134	18057	11.4585	0.412	Green
17197	P78371	TCPB_HUMAN	T complex protein 1 subunit beta OS Homo sapiens GN CCT2 PE 1 SV 4	Regular	1511.47	0	57830.5	66	20	47	47.48	224495	69794	54929	15.9519	0.9225	Green
13745	P11908	PRPS2_HUMAN	Ribose phosphate pyrophosphokinase 2 OS Homo sapiens GN PRPS2 PE 1 SV 2	Regular	1506.57	0	35168.4	30	7	23	29.25	96561	40761.8	24871	9.3164	0.3276	Green	13746 13744
7793	P31943	HNRH1_HUMAN	Heterogeneous nuclear ribonucleoprotein H OS Homo sapiens GN HNRNPH1 PE 1 SV 4	Regular	1495.27	0	49514.7	40	7	27	15.37	134223	66127.3	39781	15.1139	0.7484	Green	7794 7801
13864	Q06323	PSME1_HUMAN	Proteasome activator complex subunit 1 OS Homo sapiens GN PSME1 PE 1 SV 1	Regular	1492.08	0	28894.2	30	7	26	26.1	184050	113430	43335	25.9252	0.7491	Green
7806	O43390	HNRPR_HUMAN	Heterogeneous nuclear ribonucleoprotein R OS Homo sapiens GN HNRNPR PE 1 SV 1	Regular	1456.63	0	71228.3	53	15	51	26.86	252633	94566.7	49359	21.6139	1.5395	Green	7805
6839	P52566	GDIR2_HUMAN	Rho GDP dissociation inhibitor 2 OS Homo sapiens GN ARHGDIB PE 1 SV 3	Regular	1448.51	0	23045.1	33	9	21	51.24	125788	60200	34434	13.7591	0.3171	Green
7896	P34932	HSP74_HUMAN	Heat shock 70 kDa protein 4 OS Homo sapiens GN HSPA4 PE 1 SV 4	Regular	1439.5	0	95186.5	72	21	74	25.83	239937	73777	74207	16.8623	1.6051	Green	7872 7860
15017	P25398	RS12_HUMAN	40S ribosomal protein S12 OS Homo sapiens GN RPS12 PE 1 SV 3	Regular	1429.84	0	14914.2	20	4	16	35.61	104929	100146	21958	22.8891	0.3414	Green
7749	P09429	HMGB1_HUMAN	High mobility group protein B1 OS Homo sapiens GN HMGB1 PE 1 SV 3	Regular	1405.99	0	25064.9	70	12	17	44.19	401312	85404	62323	19.5197	0.4893	Green	7750
7741	Q01581	HMCS1_HUMAN	Hydroxymethylglutaryl CoA synthase cytoplasmic OS Homo sapiens GN HMGCS1 PE 1 SV 2	Regular	1397.62	0	57864	54	12	40	32.31	319307	135581	52505	30.9881	1.7931	Green	7742
12880	P13667	PDIA4_HUMAN	Protein disulfide isomerase A4 OS Homo sapiens GN PDIA4 PE 1 SV 2	Regular	1393.73	0	73274.7	65	18	69	28.37	257776	76602	79592	17.5079	1.2829	Green
7486	P0C0S5	H2AZ_HUMAN	Histone H2A Z OS Homo sapiens GN H2AFZ PE 1 SV 2	Regular	1388.01	0	13552.8	17	4	7	20.31	226423	91821.9	48725	20.9866	0.2844	Green	7472
6836	P31150	GDIA_HUMAN	Rab GDP dissociation inhibitor alpha OS Homo sapiens GN GDI1 PE 1 SV 2	Regular	1386.64	0	51210.1	26	8	35	18.12	89817	25010.8	30620	5.7164	0.2927	Green	6837
7801	P52597	HNRPF_HUMAN	Heterogeneous nuclear ribonucleoprotein F OS Homo sapiens GN HNRNPF PE 1 SV 3	Regular	1378.23	0	46014.1	34	6	26	17.59	113678	35650.3	33355	8.1481	0.3749	Green	7794 7793
2659	Q16543	CDC37_HUMAN	Hsp90 co chaperone Cdc37 OS Homo sapiens GN CDC37 PE 1 SV 1	Regular	1362.93	0	44981.6	30	8	31	25.13	101959	73191	40789	16.7283	0.7525	Green
17200	P49368	TCPG_HUMAN	T complex protein 1 subunit gamma OS Homo sapiens GN CCT3 PE 1 SV 4	Regular	1351.15	0	61104.3	64	12	48	26.61	209898	81579	56015	18.6455	1.1393	Green
17208	P40227	TCPZ_HUMAN	T complex protein 1 subunit zeta OS Homo sapiens GN CCT6A PE 1 SV 3	Regular	1333.42	0	58480.5	43	15	41	25.99	164234	66391	48069	15.1741	0.8874	Green
15039	P15880	RS2_HUMAN	40S ribosomal protein S2 OS Homo sapiens GN RPS2 PE 1 SV 2	Regular	1317.21	0	31609.6	37	8	27	26.62	140023	77457	27038	17.7033	0.5596	Green
18945	O75083	WDR1_HUMAN	WD repeat containing protein 1 OS Homo sapiens GN WDR1 PE 1 SV 4	Regular	1314.64	0	66877.9	53	12	43	33	113727	40252	29874	9.1999	0.6153	Green
15046	P46782	RS5_HUMAN	40S ribosomal protein S5 OS Homo sapiens GN RPS5 PE 1 SV 4	Regular	1286.64	0	23047.5	20	5	16	11.76	64366	112293	23689	25.6654	0.5915	Green
6627	P06744	G6PI_HUMAN	Glucose 6 phosphate isomerase OS Homo sapiens GN GPI PE 1 SV 4	Regular	1246.22	0	63375.4	47	14	40	22.58	291046	111935	50964	25.5835	1.6214	Green	16439
17925	A6NL28	TPM3L_HUMAN	Putative tropomyosin alpha 3 chain like protein OS Homo sapiens PE 5 SV 2	Regular	1236.45	0	26611.6	16	3	26	12.11	67276	35611.5	16845	8.1393	0.2166	Green
7860	Q92598	HS105_HUMAN	Heat shock protein 105 kDa OS Homo sapiens GN HSPH1 PE 1 SV 1	Regular	1230.75	0	97777.6	102	21	70	29.84	331255	87232	95633	19.9375	1.9494	Green	7872 7896
15038	P62273	RS29_HUMAN	40S ribosomal protein S29 OS Homo sapiens GN RPS29 PE 1 SV 2	Regular	1223.23	0	6904.89	10	2	5	30.36	17921	26881.5	4081	6.144	0.0424	Green
481	P11766	ADHX_HUMAN	Alcohol dehydrogenase class 3 OS Homo sapiens GN ADH5 PE 1 SV 4	Regular	1210.75	0	40579.7	20	6	21	14.71	38640	32076	13716	7.3312	0.2975	Green
394	P12814	ACTN1_HUMAN	Alpha actinin 1 OS Homo sapiens GN ACTN1 PE 1 SV 2	Regular	1206.28	0	103628	112	28	76	31.95	361168	63392.6	88253	14.4888	1.5014	Green	397 395 1761 396 9431
6118	P49327	FAS_HUMAN	Fatty acid synthase OS Homo sapiens GN FASN PE 1 SV 3	Regular	1187.72	0	276050	202	44	178	21.59	673674	89388	207016	20.4303	5.6398	Green
8333	Q14974	IMB1_HUMAN	Importin subunit beta 1 OS Homo sapiens GN KPNB1 PE 1 SV 2	Regular	1140.56	0	98482	68	15	62	22.95	235023	79043	61504	18.0658	1.7792	Green
397	O43707	ACTN4_HUMAN	Alpha actinin 4 OS Homo sapiens GN ACTN4 PE 1 SV 2	Regular	1125.17	0	105310	94	25	86	30.85	375048	52517.4	79462	12.0032	1.2641	Green	395 394 1761 396 9431
14434	P35244	RFA3_HUMAN	Replication protein A 14 kDa subunit OS Homo sapiens GN RPA3 PE 1 SV 1	Regular	1123.46	0	13682.8	11	3	9	29.75	27323	32851.5	9112	7.5084	0.1027	Green
10632	P26038	MOES_HUMAN	Moesin OS Homo sapiens GN MSN PE 1 SV 3	Regular	1098.57	0	67934.2	86	21	63	38.47	364096	67976.9	81347	15.5366	1.0555	Green	5669 14158
17506	Q9Y490	TLN1_HUMAN	Talin 1 OS Homo sapiens GN TLN1 PE 1 SV 3	Regular	1097.36	0	271935	200	56	208	30.85	621625	131762	180408	30.1151	8.1893	Green	17507
4368	P99999	CYC_HUMAN	Cytochrome c OS Homo sapiens GN CYCS PE 1 SV 2	Regular	1090.75	0	11862.8	16	3	10	30.48	34364	32543	13246	7.4379	0.0882	Green
8140	P63241	IF5A1_HUMAN	Eukaryotic translation initiation factor 5A 1 OS Homo sapiens GN EIF5A PE 1 SV 2	Regular	1080.65	0	17060.4	41	7	14	35.71	181268	97091	43302	22.1908	0.3786	Green	8141
13813	P25789	PSA4_HUMAN	Proteasome subunit alpha type 4 OS Homo sapiens GN PSMA4 PE 1 SV 1	Regular	1080.54	0	29769	28	6	25	31.8	83759	60223	29618	13.7644	0.4098	Green
10103	Q96M61	MAGBI_HUMAN	Melanoma associated antigen B18 OS Homo sapiens GN MAGEB18 PE 1 SV 2	Regular	1061.51	0	38760.9	19	4	26	9.33	184596	17333.5	48115	3.9617	0.1536	Green	10086 10091
14093	Q92928	RAB1C_HUMAN	Putative Ras related protein Rab 1C OS Homo sapiens GN RAB1C PE 5 SV 2	Regular	1042.59	0	22245.1	19	5	18	27.36	54652	20995.9	16436	4.7988	0.1067	Green	14240 14234 14086 14092
8141	Q9GZV4	IF5A2_HUMAN	Eukaryotic translation initiation factor 5A 2 OS Homo sapiens GN EIF5A2 PE 1 SV 3	Regular	1037.73	0	17135.4	34	5	14	32.68	129978	0	35342			Green	8140
7792	O14979	HNRDL_HUMAN	Heterogeneous nuclear ribonucleoprotein D like OS Homo sapiens GN HNRPDL PE 1 SV 3	Regular	1037.58	0	46608.7	25	5	30	10.95	116222	78888.8	32906	18.0306	0.8404	Green	7800
17196	P17987	TCPA_HUMAN	T complex protein 1 subunit alpha OS Homo sapiens GN TCP1 PE 1 SV 1	Regular	997.403	0	60856.9	47	11	46	23.38	184896	70360	51766	16.0813	0.9787	Green
18668	Q86UX7	URP2_HUMAN	Fermitin family homolog 3 OS Homo sapiens GN FERMT3 PE 1 SV 1	Regular	982.418	0	76523.2	46	14	45	22.94	147833	54010	40090	12.3444	0.9446	Green
17926	P06753	TPM3_HUMAN	Tropomyosin alpha 3 chain OS Homo sapiens GN TPM3 PE 1 SV 1	Regular	975.446	0	32875.9	39	9	27	16.2	149529	91830.2	41754	20.9884	0.69	Green	17924
19125	P13010	XRCC5_HUMAN	X ray repair cross complementing protein 5 OS Homo sapiens GN XRCC5 PE 1 SV 3	Regular	971.46	0	83275	67	17	62	30.19	186765	67009	53756	15.3154	1.2754	Green
1798	P20290	BTF3_HUMAN	Transcription factor BTF3 OS Homo sapiens GN BTF3 PE 1 SV 1	Regular	950.788	0	22225	8	2	14	10.68	14892	25389	6696	5.8028	0.129	Green
14889	P51991	ROA3_HUMAN	Heterogeneous nuclear ribonucleoprotein A3 OS Homo sapiens GN HNRNPA3 PE 1 SV 2	Regular	949.128	0	39823.1	35	8	32	23.28	158099	82467	39208	18.8484	0.7506	Green	14887
3369	Q00610	CLH1_HUMAN	Clathrin heavy chain 1 OS Homo sapiens GN CLTC PE 1 SV 5	Regular	944.045	0	193383	129	32	133	21.85	392722	75737	117538	17.3102	3.3475	Green	3370
7596	P51858	HDGF_HUMAN	Hepatoma derived growth factor OS Homo sapiens GN HDGF PE 1 SV 1	Regular	941.915	0	26902.4	28	8	30	35.83	103075	59765	38055	13.6597	0.3675	Green	13855 7599
13746	P21108	PRPS3_HUMAN	Ribose phosphate pyrophosphokinase 3 OS Homo sapiens GN PRPS1L1 PE 1 SV 2	Regular	918.448	0	35409.7	19	7	20	22.96	78078	16793	20646	3.8382	0.1359	Green	13745 13744
16879	P23381	SYWC_HUMAN	Tryptophan tRNA ligase cytoplasmic OS Homo sapiens GN WARS PE 1 SV 2	Regular	915.642	0	53507.7	34	10	44	19.75	95908	48887	18325	11.1735	0.5979	Green
1492	O00154	BACH_HUMAN	Cytosolic acyl coenzyme A thioester hydrolase OS Homo sapiens GN ACOT7 PE 1 SV 3	Regular	913.407	0	42480.4	23	5	26	16.32	69540	54271	17910	12.404	0.5269	Green
7512	P62805	H4_HUMAN	Histone H4 OS Homo sapiens GN HIST1H4A PE 1 SV 2	Regular	912.55	0	11367.4	16	5	11	39.81	34958	30059	12616	6.8702	0.0781	Green
13833	O00231	PSD11_HUMAN	26S proteasome non ATPase regulatory subunit 11 OS Homo sapiens GN PSMD11 PE 1 SV 3	Regular	908.932	0	47749	33	8	38	22.51	77483	45640	25107	10.4313	0.4981	Green
5231	P29692	EF1D_HUMAN	Elongation factor 1 delta OS Homo sapiens GN EEF1D PE 1 SV 5	Regular	908.523	0	31235.9	17	4	26	17.08	54548	49798	22232	11.3817	0.3555	Green
13886	P26599	PTBP1_HUMAN	Polypyrimidine tract binding protein 1 OS Homo sapiens GN PTBP1 PE 1 SV 1	Regular	902.771	0	57392.5	47	12	34	28.25	141661	73581	40257	16.8175	0.9652	Green
13815	P60900	PSA6_HUMAN	Proteasome subunit alpha type 6 OS Homo sapiens GN PSMA6 PE 1 SV 1	Regular	900.331	0	27855.7	29	9	20	27.24	173125	77556	20306	17.726	0.4938	Green
2660	P60953	CDC42_HUMAN	Cell division control protein 42 homolog OS Homo sapiens GN CDC42 PE 1 SV 2	Regular	894.994	0	21600.8	13	4	13	24.61	54971	45058	9131	10.2983	0.2225	Green
336	P53396	ACLY_HUMAN	ATP citrate synthase OS Homo sapiens GN ACLY PE 1 SV 3	Regular	874.572	0	121752	77	22	92	24.34	174736	59779	50286	13.6629	1.6635	Green
5669	P15311	EZRI_HUMAN	Ezrin OS Homo sapiens GN EZR PE 1 SV 4	Regular	870.173	0	69527	72	22	74	30.03	324069	107765	73231	24.6304	1.7125	Green	10632 4595 14158
13744	P60891	PRPS1_HUMAN	Ribose phosphate pyrophosphokinase 1 OS Homo sapiens GN PRPS1 PE 1 SV 2	Regular	867.609	0	35347.5	23	7	22	25.16	75195	17032.2	23756	3.8928	0.1376	Green	13746 13745
14092	Q9H0U4	RAB1B_HUMAN	Ras related protein Rab 1B OS Homo sapiens GN RAB1B PE 1 SV 1	Regular	865.314	0	22342.3	13	3	18	16.92	46784	0	11878			Green	14240 14234 14086 14093
16823	O43776	SYNC_HUMAN	Asparagine tRNA ligase cytoplasmic OS Homo sapiens GN NARS PE 1 SV 1	Regular	853.908	0	63798.4	41	11	45	19.71	161615	47767	46371	10.9175	0.6965	Green
15152	Q9Y265	RUVB1_HUMAN	RuvB like 1 OS Homo sapiens GN RUVBL1 PE 1 SV 1	Regular	848.709	0	50570.3	23	8	34	24.56	84445	49683	15494	11.3554	0.5742	Green
14630	P13489	RINI_HUMAN	Ribonuclease inhibitor OS Homo sapiens GN RNH1 PE 1 SV 2	Regular	839.949	0	51798.4	30	8	38	29.5	59850	37725	27169	8.6223	0.4466	Green
4986	Q16555	DPYL2_HUMAN	Dihydropyrimidinase related protein 2 OS Homo sapiens GN DPYSL2 PE 1 SV 1	Regular	834.272	0	62749.9	47	13	43	27.27	96741	42143	31262	9.6321	0.6044	Green
662	P05062	ALDOB_HUMAN	Fructose bisphosphate aldolase B OS Homo sapiens GN ALDOB PE 1 SV 2	Regular	830.813	0	39986.3	20	4	31	13.46	110147	7343.62	28106	1.6784	0.0671	Green	663 661
7005	O76003	GLRX3_HUMAN	Glutaredoxin 3 OS Homo sapiens GN GLRX3 PE 1 SV 2	Regular	820.872	0	37717.2	18	8	26	20.6	67497	20957	16544	4.7899	0.1807	Green
15713	Q9Y617	SERC_HUMAN	Phosphoserine aminotransferase OS Homo sapiens GN PSAT1 PE 1 SV 2	Regular	807.143	0	40821.9	23	5	29	17.57	47803	33974	23619	7.765	0.317	Green
12604	Q8NC51	PAIRB_HUMAN	Plasminogen activator inhibitor 1 RNA binding protein OS Homo sapiens GN SERBP1 PE 1 SV 2	Regular	795.879	0	45022.5	37	11	40	19.12	86332	46297	23179	10.5815	0.4764	Green
1135	P61158	ARP3_HUMAN	Actin related protein 3 OS Homo sapiens GN ACTR3 PE 1 SV 3	Regular	788.542	0	47827.5	23	8	39	36.6	70595	41341	30115	9.4488	0.4519	Green
7794	P55795	HNRH2_HUMAN	Heterogeneous nuclear ribonucleoprotein H2 OS Homo sapiens GN HNRNPH2 PE 1 SV 1	Regular	779.366	0	49548.8	30	6	27	14.7	189521	0	44760			Green	7801 7793
8427	O00410	IPO5_HUMAN	Importin 5 OS Homo sapiens GN IPO5 PE 1 SV 4	Regular	758.353	0	125113	42	11	78	14.59	106623	48149	32619	11.0048	1.3768	Green
13811	P25787	PSA2_HUMAN	Proteasome subunit alpha type 2 OS Homo sapiens GN PSMA2 PE 1 SV 2	Regular	741.118	0	26012.7	20	4	15	28.63	38702	32426	13462	7.4112	0.1928	Green
1864	P11586	C1TC_HUMAN	C 1 tetrahydrofolate synthase cytoplasmic OS Homo sapiens GN MTHFD1 PE 1 SV 3	Regular	730.477	0	102244	59	20	73	22.46	225488	68678	50506	15.6968	1.6049	Green
11810	Q9UKK9	NUDT5_HUMAN	ADP sugar pyrophosphatase OS Homo sapiens GN NUDT5 PE 1 SV 1	Regular	718.88	0	24612.8	14	4	15	17.81	44992	41673	8287	9.5247	0.2344	Green
15018	P62277	RS13_HUMAN	40S ribosomal protein S13 OS Homo sapiens GN RPS13 PE 1 SV 2	Regular	700.818	0	17222.3	8	3	13	23.18	28805	34848	3924	7.9648	0.1372	Green
10270	P33993	MCM7_HUMAN	DNA replication licensing factor MCM7 OS Homo sapiens GN MCM7 PE 1 SV 4	Regular	684.128	0	81935.4	35	10	66	18.92	110412	52738	26771	12.0536	0.9876	Green
7805	O60506	HNRPQ_HUMAN	Heterogeneous nuclear ribonucleoprotein Q OS Homo sapiens GN SYNCRIP PE 1 SV 2	Regular	662.593	0	69830.8	27	6	50	12.68	115252	35428.3	21945	8.0974	0.5654	Green	7806
15429	P23526	SAHH_HUMAN	Adenosylhomocysteinase OS Homo sapiens GN AHCY PE 1 SV 4	Regular	638.436	0	48286.5	27	8	31	13.89	102020	62550	16035	14.2962	0.6903	Green
14234	Q96DA2	RB39B_HUMAN	Ras related protein Rab 39B OS Homo sapiens GN RAB39B PE 1 SV 1	Regular	636.836	0	24850.3	11	3	22	11.27	25928	10060.1	6205	2.2993	0.0571	Green	14240 14086 14093 14092
7510	Q6NXT2	H3C_HUMAN	Histone H3 3C OS Homo sapiens GN H3F3C PE 1 SV 3	Regular	631.859	0	15327.8	9	4	11	11.85	40189	44085	6558	10.0759	0.1544	Green	30791
17199	P48643	TCPE_HUMAN	T complex protein 1 subunit epsilon OS Homo sapiens GN CCT5 PE 1 SV 1	Regular	618.35	0	60127.4	36	10	49	22.37	105483	48947	32520	11.1872	0.6727	Green
14158	P35241	RADI_HUMAN	Radixin OS Homo sapiens GN RDX PE 1 SV 1	Regular	599.514	0	68678.1	52	17	61	15.27	229105	12286.1	50455	2.8081	0.1929	Green	10632 5669
3478	P62633	CNBP_HUMAN	Cellular nucleic acid binding protein OS Homo sapiens GN CNBP PE 1 SV 1	Regular	590.611	0	20717.3	9	2	25	12.99	24811	32262	6291	7.3737	0.1528	Green
6539	Q92945	FUBP2_HUMAN	Far upstream element binding protein 2 OS Homo sapiens GN KHSRP PE 1 SV 4	Regular	590.307	0	73400.6	49	14	48	20.25	165343	58343	41139	13.3347	0.9788	Green
16335	P19623	SPEE_HUMAN	Spermidine synthase OS Homo sapiens GN SRM PE 1 SV 1	Regular	571.149	0	34395	25	6	30	17.88	57109	45169	24035	10.3237	0.3551	Green
15423	Q9UBT2	SAE2_HUMAN	SUMO activating enzyme subunit 2 OS Homo sapiens GN UBA2 PE 1 SV 2	Regular	566.708	0	71794	26	11	46	23.75	84846	29664	21035	6.7799	0.4868	Green
13341	Q14651	PLSI_HUMAN	Plastin 1 OS Homo sapiens GN PLS1 PE 1 SV 2	Regular	563.401	0	70652.8	21	5	51	5.72	114815	39339	21682	8.9912	0.6353	Green	13343 13342
8131	P38919	IF4A3_HUMAN	Eukaryotic initiation factor 4A III OS Homo sapiens GN EIF4A3 PE 1 SV 4	Regular	560.562	0	47156.3	23	6	48	11.68	86260	18760	14738	4.2877	0.2022	Green	8129
9653	P09960	LKHA4_HUMAN	Leukotriene A 4 hydrolase OS Homo sapiens GN LTA4H PE 1 SV 2	Regular	551.79	0	69912.7	25	10	54	17.02	59923	32310	16374	7.3847	0.5163	Green
13773	P62333	PRS10_HUMAN	26S protease regulatory subunit 10B OS Homo sapiens GN PSMC6 PE 1 SV 1	Regular	551.32	0	44458.2	28	8	40	18.25	79624	31771.7	24494	7.2616	0.3228	Green	7646 13795
13795	P17980	PRS6A_HUMAN	26S protease regulatory subunit 6A OS Homo sapiens GN PSMC3 PE 1 SV 3	Regular	547.896	0	49488.8	25	8	41	14.58	84434	35010.4	28977	8.0019	0.396	Green	13773 7646
13977	P22102	PUR2_HUMAN	Trifunctional purine biosynthetic protein adenosine 3 OS Homo sapiens GN GART PE 1 SV 1	Regular	538.749	0	109022	43	9	77	12.28	114392	62871	31436	14.3696	1.5666	Green
13825	P28070	PSB4_HUMAN	Proteasome subunit beta type 4 OS Homo sapiens GN PSMB4 PE 1 SV 4	Regular	537.271	0	29261.4	20	7	16	20.83	120099	31902	20655	7.2914	0.2134	Green
8124	P41091	IF2G_HUMAN	Eukaryotic translation initiation factor 2 subunit 3 OS Homo sapiens GN EIF2S3 PE 1 SV 3	Regular	534.993	0	51679.8	19	6	33	18.64	47977	34429	13977	7.869	0.4067	Green
17924	P07951	TPM2_HUMAN	Tropomyosin beta chain OS Homo sapiens GN TPM2 PE 1 SV 1	Regular	528.714	0	32964.8	18	5	28	15.85	80523	36403.8	19294	8.3203	0.2743	Green	17926
4743	Q08211	DHX9_HUMAN	ATP dependent RNA helicase A OS Homo sapiens GN DHX9 PE 1 SV 4	Regular	523.869	0	142270	53	15	99	13.07	137747	55857	50662	12.7665	1.8163	Green
14086	P61106	RAB14_HUMAN	Ras related protein Rab 14 OS Homo sapiens GN RAB14 PE 1 SV 4	Regular	522.593	0	24125.1	16	5	21	15.81	48309	14600.3	16004	3.337	0.0805	Green	14240 14234 14093 14092
11585	Q99733	NP1L4_HUMAN	Nucleosome assembly protein 1 like 4 OS Homo sapiens GN NAP1L4 PE 1 SV 1	Regular	516.395	0	42994.6	16	5	23	18.67	46636	17594	9340	4.0212	0.1729	Green	11582
9454	P05455	LA_HUMAN	Lupus La protein OS Homo sapiens GN SSB PE 1 SV 2	Regular	516.089	0	47008.2	39	15	46	29.17	106815	49585	27592	11.333	0.5327	Green
5438	Q58FF3	ENPLL_HUMAN	Putative endoplasmin like protein OS Homo sapiens GN HSP90B2P PE 5 SV 1	Regular	504.543	0	46372.3	16	6	44	13.03	78312	13361.9	13647	3.054	0.1416	Green	5439
11122	P49321	NASP_HUMAN	Nuclear autoantigenic sperm protein OS Homo sapiens GN NASP PE 1 SV 2	Regular	498.13	0	85523	36	8	78	12.94	131560	72739	32071	16.625	1.4218	Green
1025	O15143	ARC1B_HUMAN	Actin related protein 2 3 complex subunit 1B OS Homo sapiens GN ARPC1B PE 1 SV 3	Regular	484.322	0	41748.2	23	9	28	26.61	49566	25645	16391	5.8613	0.2447	Yellow
17074	A6NHL2	TBAL3_HUMAN	Tubulin alpha chain like 3 OS Homo sapiens GN TUBAL3 PE 1 SV 2	Regular	475.455	0	50707.2	21	7	38	8.74	114962	5053.21	18551	1.1549	0.0586	Green	17067
9779	Q8N1G4	LRC47_HUMAN	Leucine rich repeat containing protein 47 OS Homo sapiens GN LRRC47 PE 1 SV 1	Regular	474.757	0	64043.3	25	8	48	15.61	149468	21267	36025	4.8607	0.3113	Green
16794	P14868	SYDC_HUMAN	Aspartate tRNA ligase cytoplasmic OS Homo sapiens GN DARS PE 1 SV 2	Regular	469.403	0	57535.5	32	10	49	20.96	94559	40114	28571	9.1683	0.5275	Green
11792	P19338	NUCL_HUMAN	Nucleolin OS Homo sapiens GN NCL PE 1 SV 3	Regular	465.893	0	76671.5	52	16	59	12.96	170788	71437	60758	16.3274	1.2518	Green	13788 17275 16350 942
8118	P05198	IF2A_HUMAN	Eukaryotic translation initiation factor 2 subunit 1 OS Homo sapiens GN EIF2S1 PE 1 SV 3	Regular	462.346	0	36397.4	26	8	31	25.4	39730	20331	13341	4.6468	0.1691	Yellow
18406	Q15029	U5S1_HUMAN	116 kDa U5 small nuclear ribonucleoprotein component OS Homo sapiens GN EFTUD2 PE 1 SV 1	Regular	455.423	0	110405	20	6	73	2.26	109115	7426.75	25739	1.6974	0.1874	Green	5234
5270	P49411	EFTU_HUMAN	Elongation factor Tu mitochondrial OS Homo sapiens GN TUFM PE 1 SV 2	Regular	455.329	0	49883.8	30	11	41	13.94	47819	22824	25025	5.2166	0.2602	Green
13866	P61289	PSME3_HUMAN	Proteasome activator complex subunit 3 OS Homo sapiens GN PSME3 PE 1 SV 1	Regular	435.069	0	29620.2	20	7	20	24.02	94219	55171	28034	12.6097	0.3735	Green
13788	P62191	PRS4_HUMAN	26S protease regulatory subunit 4 OS Homo sapiens GN PSMC1 PE 1 SV 1	Regular	428.652	0	49355.7	24	7	40	17.73	69216	29591	17924	6.7632	0.3338	Green	11792 17275 16350 942
14240	A6NDJ8	RB43L_HUMAN	Putative Rab 43 like protein ENSP00000330714 OS Homo sapiens PE 5 SV 3	Regular	410.831	0	20438	7	4	22	6.08	62098	0	8389			Green	14234 14086 14093 14092
10192	Q9NZL9	MAT2B_HUMAN	Methionine adenosyltransferase 2 subunit beta OS Homo sapiens GN MAT2B PE 1 SV 1	Regular	408.88	0	37894	15	7	30	17.66	41524	27839	8275	6.3628	0.2411	Green
13857	Q13200	PSMD2_HUMAN	26S proteasome non ATPase regulatory subunit 2 OS Homo sapiens GN PSMD2 PE 1 SV 3	Regular	407.539	0.36	100941	40	13	85	14.87	90601	44770	28080	10.2325	1.0329	Green
1140	O15144	ARPC2_HUMAN	Actin related protein 2 3 complex subunit 2 OS Homo sapiens GN ARPC2 PE 1 SV 1	Regular	404.459	0.36	34447.1	17	10	37	22	100434	66283	21999	15.1495	0.5219	Yellow
16520	Q07955	SRSF1_HUMAN	Serine arginine rich splicing factor 1 OS Homo sapiens GN SRSF1 PE 1 SV 2	Regular	395.936	0.36	27858.7	16	4	29	13.31	35740	22402	7569	5.1201	0.1426	Yellow
18461	P61086	UBE2K_HUMAN	Ubiquitin conjugating enzyme E2 K OS Homo sapiens GN UBE2K PE 1 SV 3	Regular	395.463	0.36	22520.7	5	2	17	6	14161	36957	4222	8.4468	0.1902	Green
14304	P49792	RBP2_HUMAN	E3 SUMO protein ligase RanBP2 OS Homo sapiens GN RANBP2 PE 1 SV 2	Regular	390.027	0.35	362591	44	25	264	3.19	289199	15925	90972	3.6398	1.3197	Green	14500 13526 10958
16876	P26640	SYVC_HUMAN	Valine tRNA ligase OS Homo sapiens GN VARS PE 1 SV 4	Regular	386.912	0.35	141731	52	18	90	13.29	112639	32414	37555	7.4084	1.05	Green
6739	Q92538	GBF1_HUMAN	Golgi specific brefeldin A resistance guanine nucleotide exchange factor 1 OS Homo sapiens GN GBF1 P	Regular	376.165	0.35	208499	21	10	133	3.87	277335	19797	70394	4.5247	0.9434	Green	7877 7876
15750	Q15393	SF3B3_HUMAN	Splicing factor 3B subunit 3 OS Homo sapiens GN SF3B3 PE 1 SV 4	Regular	371.497	0.35	136661	46	18	72	14.63	127155	42093	32995	9.6207	1.3148	Green
12450	Q96FW1	OTUB1_HUMAN	Ubiquitin thioesterase OTUB1 OS Homo sapiens GN OTUB1 PE 1 SV 2	Regular	366.202	0.7	31512.2	14	4	23	20.3	58816	37047	16265	8.4674	0.2668	Yellow
14299	P38159	RBMX_HUMAN	RNA binding motif protein X chromosome OS Homo sapiens GN RBMX PE 1 SV 3	Regular	363.317	0.69	42331.9	19	6	99	15.09	73829	54722	21794	12.5071	0.5294	Green
16815	P56192	SYMC_HUMAN	Methionine tRNA ligase cytoplasmic OS Homo sapiens GN MARS PE 1 SV 2	Regular	359.61	0.69	102313	32	10	51	13	111313	65408	24788	14.9495	1.5295	Green
7803	P14866	HNRPL_HUMAN	Heterogeneous nuclear ribonucleoprotein L OS Homo sapiens GN HNRNPL PE 1 SV 2	Regular	357.384	0.69	64760.2	20	7	34	6.79	76208	53985	16533	12.3387	0.7991	Green
10267	P33991	MCM4_HUMAN	DNA replication licensing factor MCM4 OS Homo sapiens GN MCM4 PE 1 SV 5	Regular	353.35	0.69	97128.4	48	15	69	17.96	103039	44694	34899	10.2151	0.9922	Yellow
12882	Q15084	PDIA6_HUMAN	Protein disulfide isomerase A6 OS Homo sapiens GN PDIA6 PE 1 SV 1	Regular	350.127	0.68	48520.6	24	7	35	12.27	51804	43762	13367	10.0021	0.4853	Green
396	Q08043	ACTN3_HUMAN	Alpha actinin 3 OS Homo sapiens GN ACTN3 PE 1 SV 2	Regular	349.727	0.68	103983	36	13	79	9.77	127227	30994	28974	7.0839	0.7366	Green	397 395 394 1761 9431
7435	P49915	GUAA_HUMAN	GMP synthase glutamine hydrolyzing OS Homo sapiens GN GMPS PE 1 SV 1	Regular	344.137	0.68	77456.9	27	11	68	11.69	125116	37346	25698	8.5357	0.6611	Yellow
10264	P49736	MCM2_HUMAN	DNA replication licensing factor MCM2 OS Homo sapiens GN MCM2 PE 1 SV 4	Regular	343.641	0.68	102581	36	13	76	11.84	96662	48402	26049	11.0626	1.1348	Green
15050	P46781	RS9_HUMAN	40S ribosomal protein S9 OS Homo sapiens GN RPS9 PE 1 SV 3	Regular	338.883	0.68	22648.5	10	4	17	18.04	52021	42647	4211	9.7473	0.2208	Yellow
395	P35609	ACTN2_HUMAN	Alpha actinin 2 OS Homo sapiens GN ACTN2 PE 1 SV 1	Regular	321.858	1.34	104424	43	15	79	10.51	156428	7720.69	28361	1.7646	0.1843	Green	397 394 1761 396 9431
1980	Q537H7	CA227_HUMAN	UPF0732 protein C1orf227 OS Homo sapiens GN C1orf227 PE 2 SV 1	Regular	308.986	1.33	11413.1	3	1	11	10.2	11896	35688	3598	8.1567	0.0931	Yellow
13861	Q15008	PSMD6_HUMAN	26S proteasome non ATPase regulatory subunit 6 OS Homo sapiens GN PSMD6 PE 1 SV 1	Regular	308.573	1.33	45816.6	18	7	40	6.94	46320	35593.5	12102	8.1351	0.3727	Yellow
11508	P30419	NMT1_HUMAN	Glycylpeptide N tetradecanoyltransferase 1 OS Homo sapiens GN NMT1 PE 1 SV 2	Regular	298.137	1.32	57148.5	18	7	31	9.88	48448	27893	14677	6.3751	0.3643	Yellow
8430	Q96P70	IPO9_HUMAN	Importin 9 OS Homo sapiens GN IPO9 PE 1 SV 3	Regular	297.017	1.32	116933	24	14	61	7.49	46700	17684	21777	4.0418	0.4726	Yellow
14244	Q09028	RBBP4_HUMAN	Histone binding protein RBBP4 OS Homo sapiens GN RBBP4 PE 1 SV 3	Regular	296.324	1.32	47940.9	14	4	26	11.29	60481	54278	13214	12.4056	0.5947	Yellow
1132	P61160	ARP2_HUMAN	Actin related protein 2 OS Homo sapiens GN ACTR2 PE 1 SV 1	Regular	294.586	1.31	45046	25	7	23	14.21	73945	44259	13099	10.1157	0.4557	Yellow
14550	Q07960	RHG01_HUMAN	Rho GTPase activating protein 1 OS Homo sapiens GN ARHGAP1 PE 1 SV 1	Regular	293.427	1.31	50492.8	16	5	34	13.9	24613	22047	13235	5.039	0.2544	Yellow
18939	Q9GZL7	WDR12_HUMAN	Ribosome biogenesis protein WDR12 OS Homo sapiens GN WDR12 PE 1 SV 2	Regular	293.39	1.3	48221.3	20	9	30	14.89	56743	17103	29826	3.909	0.1885	Yellow
13812	P25788	PSA3_HUMAN	Proteasome subunit alpha type 3 OS Homo sapiens GN PSMA3 PE 1 SV 2	Regular	291.574	1.3	28661.4	13	6	30	19.22	45232	38619	8325	8.8266	0.253	Yellow
3840	A6NMK7	CPS4L_HUMAN	Putative cleavage and polyadenylation specificity factor subunit 4 like protein OS Homo sapiens GN C	Regular	288.553	1.29	21582.8	8	3	14	5.03	24854	6657	5500	1.5215	0.0328	Yellow
1559	P54687	BCAT1_HUMAN	Branched chain amino acid aminotransferase cytosolic OS Homo sapiens GN BCAT1 PE 1 SV 3	Regular	287.25	1.61	43536.5	10	4	24	8.55	6273	6822	6147	1.5592	0.0679	Yellow
18537	P45974	UBP5_HUMAN	Ubiquitin carboxyl terminal hydrolase 5 OS Homo sapiens GN USP5 PE 1 SV 2	Regular	286.524	1.6	96698.9	23	9	62	10.61	31680	19632	15386	4.487	0.4339	Green
16522	P84103	SRSF3_HUMAN	Serine arginine rich splicing factor 3 OS Homo sapiens GN SRSF3 PE 1 SV 1	Regular	284.853	1.6	19557.7	12	3	14	14.02	49719	68899.5	10874	15.7475	0.308	Yellow
4610	P17844	DDX5_HUMAN	Probable ATP dependent RNA helicase DDX5 OS Homo sapiens GN DDX5 PE 1 SV 1	Regular	281.475	1.59	69661.4	34	12	59	11.07	88055	26377.3	23842	6.0287	0.42	Yellow	4581
7872	O95757	HS74L_HUMAN	Heat shock 70 kDa protein 4L OS Homo sapiens GN HSPA4L PE 1 SV 3	Regular	280.561	1.59	95539.2	19	8	70	2.38	64161	16600.6	13223	3.7942	0.3625	Green	7896 7860
16184	O95219	SNX4_HUMAN	Sorting nexin 4 OS Homo sapiens GN SNX4 PE 1 SV 1	Regular	278.124	1.58	52194.1	17	7	46	7.78	64458	40379	14032	9.2289	0.4817	Yellow
13547	P49593	PPM1F_HUMAN	Protein phosphatase 1F OS Homo sapiens GN PPM1F PE 1 SV 3	Regular	275.433	1.58	50002	15	4	34	11.45	28161	17713	12894	4.0484	0.2024	Yellow
4581	Q92841	DDX17_HUMAN	Probable ATP dependent RNA helicase DDX17 OS Homo sapiens GN DDX17 PE 1 SV 2	Regular	271.99	1.88	80956.9	34	13	67	8.23	68619	23357.1	27393	5.3384	0.4322	Yellow	4610
7599	Q9Y3E1	HDGR3_HUMAN	Hepatoma derived growth factor related protein 3 OS Homo sapiens GN HDGFRP3 PE 1 SV 1	Regular	262.371	2.48	22676.8	7	4	19	11.82	28850	6037.84	13042	1.38	0.0313	Green	7516 8408 13855 7596 16796
656	P49189	AL9A1_HUMAN	4 trimethylaminobutyraldehyde dehydrogenase OS Homo sapiens GN ALDH9A1 PE 1 SV 3	Regular	261.397	2.48	54714.5	15	7	42	8.5	37527	15327	12815	3.5031	0.1917	Yellow
2112	Q86VP6	CAND1_HUMAN	Cullin associated NEDD8 dissociated protein 1 OS Homo sapiens GN CAND1 PE 1 SV 2	Regular	257.569	2.47	138087	40	17	98	11.54	99989	28621	45133	6.5415	0.9033	Green
17132	Q9BZK7	TBL1R_HUMAN	F box like WD repeat containing protein TBL1XR1 OS Homo sapiens GN TBL1XR1 PE 1 SV 1	Regular	249.925	2.46	56222.3	18	8	33	15.37	205899	33157	39115	7.5783	0.4261	Red	17133
4063	Q9UNS2	CSN3_HUMAN	COP9 signalosome complex subunit 3 OS Homo sapiens GN COPS3 PE 1 SV 3	Regular	242.988	2.45	48443.5	10	3	32	13	8172	8172	6114	1.8678	0.0905	Yellow
10268	P33992	MCM5_HUMAN	DNA replication licensing factor MCM5 OS Homo sapiens GN MCM5 PE 1 SV 5	Regular	237.463	2.74	83084.1	25	10	57	7.63	100243	37609	23188	8.5958	0.7142	Yellow
10269	Q14566	MCM6_HUMAN	DNA replication licensing factor MCM6 OS Homo sapiens GN MCM6 PE 1 SV 1	Regular	237.243	2.74	93858.9	28	11	74	10.96	74832	28443	21841	6.5008	0.6102	Yellow
16809	P41252	SYIC_HUMAN	Isoleucine tRNA ligase cytoplasmic OS Homo sapiens GN IARS PE 1 SV 2	Regular	233.767	2.73	145810	33	12	98	9.83	48587	19516	21861	4.4605	0.6504	Yellow
18789	P08670	VIME_HUMAN	Vimentin OS Homo sapiens GN VIM PE 1 SV 4	Regular	229.855	3.01	53708.8	17	10	47	5.58	56506	40333.5	21170	9.2185	0.4951	Yellow	8745
10454	P61326	MGN_HUMAN	Protein mago nashi homolog OS Homo sapiens GN MAGOH PE 1 SV 1	Regular	224.868	3	17220.7	7	3	16	12.33	19387	8715	4463	1.9919	0.0343	Red
6360	P21333	FLNA_HUMAN	Filamin A OS Homo sapiens GN FLNA PE 1 SV 4	Regular	220.229	2.99	283477	55	23	176	6.88	127627	20264	39418	4.6315	1.3129	Green	6361 6362
1225	P08243	ASNS_HUMAN	Asparagine synthetase glutamine hydrolyzing OS Homo sapiens GN ASNS PE 1 SV 4	Regular	214.223	3.27	64940.3	21	10	48	8.02	61867	18664	23521	4.2658	0.277	Yellow
241	P61221	ABCE1_HUMAN	ATP binding cassette sub family E member 1 OS Homo sapiens GN ABCE1 PE 1 SV 1	Regular	212.367	3.26	68283.9	9	5	43	7.35	28574	24364.5	6810	5.5687	0.3803	Yellow
16439	Q01082	SPTB2_HUMAN	Spectrin beta chain non erythrocytic 1 OS Homo sapiens GN SPTBN1 PE 1 SV 2	Regular	208.527	3.54	275408	77	35	240	9.77	153217	19826	48000	4.5314	1.248	Green	16438 16445 6627
16881	P54577	SYYC_HUMAN	Tyrosine tRNA ligase cytoplasmic OS Homo sapiens GN YARS PE 1 SV 4	Regular	208.208	3.53	59485.7	22	11	51	8.14	49748	19681	15456	4.4982	0.2676	Yellow
17928	P51580	TPMT_HUMAN	Thiopurine S methyltransferase OS Homo sapiens GN TPMT PE 1 SV 1	Regular	204.54	3.52	28636.6	12	5	18	11.02	21026	12086	6470	2.7623	0.0791	Red
7799	P07910	HNRPC_HUMAN	Heterogeneous nuclear ribonucleoproteins C1 C2 OS Homo sapiens GN HNRNPC PE 1 SV 4	Regular	203.405	3.51	33727.1	13	5	34	3.59	44771	24846	11897	5.6787	0.1915	Yellow
6700	Q14697	GANAB_HUMAN	Neutral alpha glucosidase AB OS Homo sapiens GN GANAB PE 1 SV 3	Regular	203.056	3.5	107330	29	10	69	10.49	59418	31608	16629	7.2242	0.7754	Yellow
8428	O95373	IPO7_HUMAN	Importin 7 OS Homo sapiens GN IPO7 PE 1 SV 1	Regular	196.165	4.05	120828	19	5	69	8.96	60967	51992	15135	11.8831	1.4358	Yellow
12518	Q32P28	P3H1_HUMAN	Prolyl 3 hydroxylase 1 OS Homo sapiens GN LEPRE1 PE 1 SV 2	Regular	195.452	4.31	84249.5	25	9	59	10.73	26062	8236	14413	1.8824	0.1586	Yellow
11380	Q00653	NFKB2_HUMAN	Nuclear factor NF kappa B p100 subunit OS Homo sapiens GN NFKB2 PE 1 SV 4	Regular	191.21	4.3	97433.6	30	12	56	11.67	103167	29433	40979	6.7271	0.6554	Yellow
8025	Q9Y4L1	HYOU1_HUMAN	Hypoxia up regulated protein 1 OS Homo sapiens GN HYOU1 PE 1 SV 1	Regular	189.936	4.56	111564	23	13	88	15.22	63145	31122	21239	7.1132	0.7936	Red
18398	P26368	U2AF2_HUMAN	Splicing factor U2AF 65 kDa subunit OS Homo sapiens GN U2AF2 PE 1 SV 4	Regular	185.277	5.08	53843.3	17	4	26	8.21	35454	20495	12932	4.6843	0.2522	Yellow
5591	Q5XG92	EST4A_HUMAN	Carboxylesterase 4A OS Homo sapiens GN CES4A PE 2 SV 2	Regular	180.85	5.34	63928.2	6	3	38	1.96	22169	24645	9442	5.6328	0.3601	Yellow
18308	Q9BSA4	TTYH2_HUMAN	Protein tweety homolog 2 OS Homo sapiens GN TTYH2 PE 1 SV 3	Regular	180.407	5.59	59856	17	5	27	3.75	201543	275208	27367	62.9007	3.765	Yellow
17133	O60907	TBL1X_HUMAN	F box like WD repeat containing protein TBL1X OS Homo sapiens GN TBL1X PE 1 SV 3	Regular	179.357	5.57	63294.1	14	5	38	8.67	20373	11326	9655	2.5886	0.1638	Red	17132
16444	Q13813	SPTN1_HUMAN	Spectrin alpha chain non erythrocytic 1 OS Homo sapiens GN SPTAN1 PE 1 SV 3	Regular	178.391	5.56	285338	89	33	272	9.91	177639	31281	85573	7.1495	2.04	Yellow	17047
6346	Q13451	FKBP5_HUMAN	Peptidyl prolyl cis trans isomerase FKBP5 OS Homo sapiens GN FKBP5 PE 1 SV 2	Regular	177.977	5.54	51725.5	14	7	45	6.56	18827	8604	10476	1.9665	0.1017	Yellow
10763	P0C860	MS3L2_HUMAN	Putative male specific lethal 3 protein like 2 OS Homo sapiens GN MSL3P1 PE 5 SV 1	Regular	177.183	6.04	51525.9	14	8	42	8.28	39717	16490	8664	3.7689	0.1942	Yellow
18675	Q495M9	USH1G_HUMAN	Usher syndrome type 1G protein OS Homo sapiens GN USH1G PE 1 SV 1	Regular	176.87	6.03	51888.3	14	4	34	8.03	34628	34183.5	16464	7.8129	0.4054	Red
8842	Q16566	KCC4_HUMAN	Calcium calmodulin dependent protein kinase type IV OS Homo sapiens GN CAMK4 PE 1 SV 1	Regular	176.78	6.01	52381.8	18	10	42	14.16	72982	55716	12795	12.7343	0.667	Red
14329	P18754	RCC1_HUMAN	Regulator of chromosome condensation OS Homo sapiens GN RCC1 PE 1 SV 1	Regular	172.548	5.99	45425.3	15	5	26	17.58	22047	10771	13063	2.4618	0.1118	Red
9302	P51812	KS6A3_HUMAN	Ribosomal protein S6 kinase alpha 3 OS Homo sapiens GN RPS6KA3 PE 1 SV 1	Regular	171.494	5.98	84078.3	27	10	69	9.32	51451	23808	17208	5.4415	0.4575	Red
13142	P01833	PIGR_HUMAN	Polymeric immunoglobulin receptor OS Homo sapiens GN PIGR PE 1 SV 4	Regular	167.739	6.47	84481.2	20	7	62	3.4	47226	46446	13887	10.6156	0.8968	Yellow
17136	Q12788	TBL3_HUMAN	Transducin beta like protein 3 OS Homo sapiens GN TBL3 PE 1 SV 2	Regular	165.666	6.7	90403.4	26	9	61	9.53	44278	14875	24957	3.3998	0.3074	Red
8745	P12035	K2C3_HUMAN	Keratin type II cytoskeletal 3 OS Homo sapiens GN KRT3 PE 1 SV 3	Regular	164.631	6.68	64588.2	15	9	43	9.39	22043	6923	10270	1.5823	0.1022	Yellow	18789
12573	Q96DU9	PABP5_HUMAN	Polyadenylate binding protein 5 OS Homo sapiens GN PABPC5 PE 1 SV 1	Regular	164.431	6.67	43672.9	15	7	31	8.64	23088	6137	12526	1.4027	0.0613	Red
9673	P02545	LMNA_HUMAN	Prelamin A C OS Homo sapiens GN LMNA PE 1 SV 1	Regular	163.458	6.65	74424.7	23	11	73	7.68	67345	20386	14794	4.6594	0.3468	Yellow
10375	Q14696	MESD_HUMAN	LDLR chaperone MESD OS Homo sapiens GN MESDC2 PE 1 SV 2	Regular	162.108	6.63	26247.8	6	2	23	8.55	11255	16278	2299	3.7205	0.0977	Red
1526	Q9HBU1	BARX1_HUMAN	Homeobox protein BarH like 1 OS Homo sapiens GN BARX1 PE 1 SV 2	Regular	161.631	6.61	27412.5	4	3	18	5.91	20239	34248	4344	7.8276	0.2146	Red
10117	Q5TCQ9	MAGI3_HUMAN	Membrane associated guanylate kinase WW and PDZ domain containing protein 3 OS Homo sapiens GN MAGI	Regular	160.647	6.6	166520	23	15	117	6.24	73261	18664	21800	4.2658	0.7103	Yellow	35987
12673	P09874	PARP1_HUMAN	Poly ADP ribose polymerase 1 OS Homo sapiens GN PARP1 PE 1 SV 4	Regular	160.615	6.58	113882	22	9	83	4.54	61048	23606	22446	5.3953	0.6144	Yellow
14568	P42331	RHG25_HUMAN	Rho GTPase activating protein 25 OS Homo sapiens GN ARHGAP25 PE 1 SV 2	Regular	160.113	6.56	73948.6	31	13	62	9.46	68309	10691	31094	2.4435	0.1807	Yellow
2376	P0C7W6	CC172_HUMAN	Coiled coil domain containing protein 172 OS Homo sapiens GN CCDC172 PE 2 SV 1	Regular	158.589	6.54	31206.5	7	3	29	9.69	23894	23095.5	8561	5.2786	0.1647	Red
17420	Q9NXG2	THUM1_HUMAN	THUMP domain containing protein 1 OS Homo sapiens GN THUMPD1 PE 1 SV 2	Regular	158.356	6.53	39714.6	8	4	37	11.61	22660	16561	5520	3.7851	0.1503	Yellow
1529	P80723	BASP1_HUMAN	Brain acid soluble protein 1 OS Homo sapiens GN BASP1 PE 1 SV 2	Regular	156.884	6.51	22693.4	5	3	27	22.03	5811	3753	2568	0.8578	0.0195	Red
8099	O43837	IDH3B_HUMAN	Isocitrate dehydrogenase NAD subunit beta mitochondrial OS Homo sapiens GN IDH3B PE 1 SV 2	Regular	155.819	6.49	42468.9	13	4	28	12.47	26441	10377	8721	2.3717	0.1007	Red
7842	Q86YV9	HPS6_HUMAN	Hermansky Pudlak syndrome 6 protein OS Homo sapiens GN HPS6 PE 1 SV 1	Regular	153.762	6.48	83773.2	10	4	49	1.29	21867	34728	6735	7.9373	0.6649	Yellow
14883	Q9BQ52	RNZ2_HUMAN	Zinc phosphodiesterase ELAC protein 2 OS Homo sapiens GN ELAC2 PE 1 SV 2	Regular	153.458	6.46	93473.8	16	7	67	5.33	20410	7374	16315	1.6854	0.1575	Red
5310	Q14152	EIF3A_HUMAN	Eukaryotic translation initiation factor 3 subunit A OS Homo sapiens GN EIF3A PE 1 SV 1	Regular	152.717	6.92	166969	34	18	250	6.73	84392	22383	27653	5.1158	0.8542	Yellow
5981	A6NHR8	FA47D_HUMAN	Putative protein FAM47D OS Homo sapiens GN FAM47DP PE 5 SV 3	Regular	152.422	6.91	47270.7	18	8	35	6.55	35448	14061	15567	3.2137	0.1519	Yellow	5978
1260	P05023	AT1A1_HUMAN	Sodium potassium transporting ATPase subunit alpha 1 OS Homo sapiens GN ATP1A1 PE 1 SV 1	Regular	150.045	6.89	114208	20	9	71	3.42	59358	2173.39	13304	0.4967	0.0567	Red	1261 1262
2285	Q9HC52	CBX8_HUMAN	Chromobox protein homolog 8 OS Homo sapiens GN CBX8 PE 1 SV 3	Regular	148.38	6.87	43509.8	11	4	140	5.4	10628	13392	7478	3.0608	0.1332	Red
4585	Q9NR30	DDX21_HUMAN	Nucleolar RNA helicase 2 OS Homo sapiens GN DDX21 PE 1 SV 5	Regular	146.762	7.32	87857.8	20	8	75	5.87	58392	29170	21159	6.667	0.5857	Yellow
17488	Q5JTD0	TJAP1_HUMAN	Tight junction associated protein 1 OS Homo sapiens GN TJAP1 PE 1 SV 1	Regular	145.417	7.3	62163.5	10	4	46	5.57	13726	9330	6416	2.1324	0.1326	Red
4392	Q69YQ0	CYTSA_HUMAN	Cytospin A OS Homo sapiens GN SPECC1L PE 1 SV 2	Regular	145.392	7.29	125001	21	8	91	4.21	43703	17262	14683	3.9454	0.4932	Yellow
14558	Q8IWW6	RHG12_HUMAN	Rho GTPase activating protein 12 OS Homo sapiens GN ARHGAP12 PE 1 SV 1	Regular	143.689	7.27	96596.7	4	4	68	5.56	11774	6733.5	3892	1.539	0.1487	Red
8126	O60841	IF2P_HUMAN	Eukaryotic translation initiation factor 5B OS Homo sapiens GN EIF5B PE 1 SV 4	Regular	142.942	7.25	139283	27	12	103	11.07	46755	18953	18565	4.3318	0.6034	Red
7348	P38646	GRP75_HUMAN	Stress 70 protein mitochondrial OS Homo sapiens GN HSPA9 PE 1 SV 2	Regular	142.425	7.23	73965.8	28	15	69	3.39	187210	24958.6	60132	5.7045	0.4219	Green	7899 7895 26352 16445
19109	Q92889	XPF_HUMAN	DNA repair endonuclease XPF OS Homo sapiens GN ERCC4 PE 1 SV 3	Regular	140.444	7.21	105399	24	11	79	9.06	49567	22279	15352	5.092	0.5367	Red
6533	O95954	FTCD_HUMAN	Formimidoyltransferase cyclodeaminase OS Homo sapiens GN FTCD PE 1 SV 2	Regular	140.08	7.43	59611	10	4	46	11.28	16600	14441	9772	3.3006	0.1968	Red
15006	P56182	RRP1_HUMAN	Ribosomal RNA processing protein 1 homolog A OS Homo sapiens GN RRP1 PE 1 SV 1	Regular	140.063	7.41	53067.4	5	4	36	6.29	19040	23415	2845	5.3517	0.284	Red
19780	Q8N895	ZN366_HUMAN	Zinc finger protein 366 OS Homo sapiens GN ZNF366 PE 1 SV 1	Regular	138.182	8.07	86818.4	21	11	63	6.85	58688	22838	16494	5.2198	0.4532	Red
5391	Q9Y6C2	EMIL1_HUMAN	EMILIN 1 OS Homo sapiens GN EMILIN1 PE 1 SV 2	Regular	137.727	8.05	107979	20	9	63	7.38	51033	26458	13483	6.0472	0.653	Yellow
16476	Q14247	SRC8_HUMAN	Src substrate cortactin OS Homo sapiens GN CTTN PE 1 SV 2	Regular	137.177	8.03	61757.3	16	8	46	5.27	24146	5844	9490	1.3357	0.0825	Red
4431	Q14118	DAG1_HUMAN	Dystroglycan OS Homo sapiens GN DAG1 PE 1 SV 2	Regular	136.934	8.01	97783.8	7	6	65	5.59	9888	3820	5298	0.8731	0.0854	Yellow
17767	P28289	TMOD1_HUMAN	Tropomodulin 1 OS Homo sapiens GN TMOD1 PE 1 SV 1	Regular	136.685	8.21	40683.3	10	3	32	5.01	10339	12837	7069	2.934	0.1194	Red
3546	Q9C0A0	CNTP4_HUMAN	Contactin associated protein like 4 OS Homo sapiens GN CNTNAP4 PE 1 SV 3	Regular	135.844	8.63	147271	24	9	82	4.05	52601	24019	17689	5.4897	0.8085	Yellow	3545
13122	Q8WXW3	PIBF1_HUMAN	Progesterone induced blocking factor 1 OS Homo sapiens GN PIBF1 PE 2 SV 2	Regular	135.197	8.61	90089.9	21	10	95	9.91	93316	58029	14234	13.2629	1.1949	Yellow
6319	O43427	FIBP_HUMAN	Acidic fibroblast growth factor intracellular binding protein OS Homo sapiens GN FIBP PE 1 SV 3	Regular	132.4	9.03	42163.3	11	5	33	10.44	14261	11268	8224	2.5754	0.1086	Red
10152	P27816	MAP4_HUMAN	Microtubule associated protein 4 OS Homo sapiens GN MAP4 PE 1 SV 3	Regular	131.903	9	121518	24	11	133	4.25	89635	12899	18150	2.9482	0.3583	Yellow	40108 4059 1873 30551 30380 18695 24656 39347
12839	Q8WUM4	PDC6I_HUMAN	Programmed cell death 6 interacting protein OS Homo sapiens GN PDCD6IP PE 1 SV 1	Regular	131.17	8.98	96650.6	24	12	83	9.56	55213	20773	20713	4.7478	0.4589	Yellow
15865	A0MZ66	SHOT1_HUMAN	Shootin 1 OS Homo sapiens GN KIAA1598 PE 1 SV 4	Regular	130.633	8.96	72153.2	16	9	73	4.6	86640	9753	13733	2.2291	0.1608	Yellow
3545	Q9BZ76	CNTP3_HUMAN	Contactin associated protein like 3 OS Homo sapiens GN CNTNAP3 PE 2 SV 3	Regular	130.262	8.94	142857	25	9	86	4.74	41804	20679	17864	4.7263	0.6752	Yellow	3546
19784	Q8NA42	ZN383_HUMAN	Zinc finger protein 383 OS Homo sapiens GN ZNF383 PE 2 SV 1	Regular	129.055	9.77	56323.8	9	4	47	2.95	27483	32833.5	8196	7.5043	0.4227	Yellow
88	P63151	2ABA_HUMAN	Serine threonine protein phosphatase 2A 55 kDa regulatory subunit B alpha isoform OS Homo sapiens GN	Regular	128.606	9.74	52205.4	10	5	36	7.16	30262	17085	6850	3.9049	0.2039	Red
8765	Q01813	K6PP_HUMAN	6 phosphofructokinase type C OS Homo sapiens GN PFKP PE 1 SV 2	Regular	128.548	9.72	86508.7	20	8	51	7.78	56947	28744	12562	6.5696	0.5683	Red
9906	Q86TE4	LUZP2_HUMAN	Leucine zipper protein 2 OS Homo sapiens GN LUZP2 PE 2 SV 2	Regular	128.434	9.7	39299.9	12	7	33	5.49	32642	20122.5	12731	4.5991	0.1807	Red
10197	O95460	MATN4_HUMAN	Matrilin 4 OS Homo sapiens GN MATN4 PE 1 SV 3	Regular	126.009	10.5	70254.9	17	6	45	4.82	57251	20548.5	11556	4.6965	0.33	Yellow
10321	Q9NVC6	MED17_HUMAN	Mediator of RNA polymerase II transcription subunit 17 OS Homo sapiens GN MED17 PE 1 SV 2	Regular	125.314	10.48	73403.5	18	10	48	2.76	48610	17290.5	13146	3.9519	0.2901	Yellow
12118	O60313	OPA1_HUMAN	Dynamin like 120 kDa protein mitochondrial OS Homo sapiens GN OPA1 PE 1 SV 3	Regular	125.262	10.45	112201	22	11	87	7.08	115653	48051	26557	10.9824	1.2322	Yellow
12704	P49023	PAXI_HUMAN	Paxillin OS Homo sapiens GN PXN PE 1 SV 3	Regular	124.778	10.43	65988.1	8	5	45	9.14	14421	10515	7473	2.4033	0.1586	Red
6364	Q14254	FLOT2_HUMAN	Flotillin 2 OS Homo sapiens GN FLOT2 PE 1 SV 2	Regular	124.515	10.41	47463.4	9	6	42	3.04	91243	5691	7620	1.3007	0.0617	Red
360	P13798	ACPH_HUMAN	Acylamino acid releasing enzyme OS Homo sapiens GN APEH PE 1 SV 4	Regular	124.043	10.38	82194.1	13	4	40	3.96	76915	82878	15721	18.9424	1.557	Red
379	Q53FZ2	ACSM3_HUMAN	Acyl coenzyme A synthetase ACSM3 mitochondrial OS Homo sapiens GN ACSM3 PE 1 SV 2	Regular	122.99	10.36	66723.1	19	7	47	5.97	44314	23167.5	22968	5.2951	0.3533	Red
6103	Q8NB91	FANCB_HUMAN	Fanconi anemia group B protein OS Homo sapiens GN FANCB PE 1 SV 1	Regular	121.646	10.74	99494.3	17	6	83	3.61	108577	14346	21435	3.2789	0.3262	Red	18824 14564
5616	P57679	EVC_HUMAN	Ellis van Creveld syndrome protein OS Homo sapiens GN EVC PE 1 SV 1	Regular	121.068	10.71	112960	19	9	80	5.95	51095	12606	13048	2.8812	0.3255	Red
18101	Q9NUP7	TRM13_HUMAN	tRNA guanosine 2 O methyltransferase TRM13 homolog OS Homo sapiens GN CCDC76 PE 1 SV 2	Regular	121.028	10.69	55102.5	16	8	48	17.46	72757	38913	17358	8.8938	0.4901	Red
14572	Q52LW3	RHG29_HUMAN	Rho GTPase activating protein 29 OS Homo sapiens GN ARHGAP29 PE 1 SV 2	Regular	120.662	10.67	143604	44	23	107	4.84	93218	29080	38480	6.6464	0.9545	Red
19110	O14980	XPO1_HUMAN	Exportin 1 OS Homo sapiens GN XPO1 PE 1 SV 1	Regular	120.227	10.84	124527	19	7	87	6.07	66489	32783	12451	7.4928	0.9331	Red
4070	P13611	CSPG2_HUMAN	Versican core protein OS Homo sapiens GN VCAN PE 1 SV 3	Regular	119.723	11.01	374816	42	17	199	2.39	120626	32321	49015	7.3872	2.7688	Yellow
16350	Q9UQ90	SPG7_HUMAN	Paraplegin OS Homo sapiens GN SPG7 PE 1 SV 2	Regular	118.303	11.57	88463	11	5	69	2.52	57855	8595.59	13179	1.9646	0.1738	Green	11792 13788 17275 1638 942
7405	Q86UP8	GTD2A_HUMAN	General transcription factor II I repeat domain containing protein 2A OS Homo sapiens GN GTF2IRD2 PE	Regular	118.104	11.55	108600	13	7	63	5.9	64230	14858	9205	3.3959	0.3688	Red
9678	Q8WWI1	LMO7_HUMAN	LIM domain only protein 7 OS Homo sapiens GN LMO7 PE 1 SV 3	Regular	116.886	11.71	194122	30	15	173	6	102312	37888	26437	8.6596	1.681	Yellow
6788	Q8IWJ2	GCC2_HUMAN	GRIP and coiled coil domain containing protein 2 OS Homo sapiens GN GCC2 PE 1 SV 4	Regular	115.887	12.45	196993	41	20	203	6.35	251885	25178	43059	5.7546	1.1336	Yellow
3370	P53675	CLH2_HUMAN	Clathrin heavy chain 2 OS Homo sapiens GN CLTCL1 PE 1 SV 2	Regular	114.757	12.42	189140	31	9	133	2.68	77271	7700.15	27366	1.7599	0.3329	Green	3369
8993	O75037	KI21B_HUMAN	Kinesin like protein KIF21B OS Homo sapiens GN KIF21B PE 1 SV 2	Regular	113.517	13.32	184430	28	14	134	3.67	69097	19630	19184	4.4866	0.8275	Red	9030
18870	Q8N3P4	VPS8_HUMAN	Vacuolar protein sorting associated protein 8 homolog OS Homo sapiens GN VPS8 PE 1 SV 3	Regular	113.243	13.29	163807	35	18	110	7.14	125016	22053	24114	5.0404	0.8256	Red
9562	Q8N0V4	LGI2_HUMAN	Leucine rich repeat LGI family member 2 OS Homo sapiens GN LGI2 PE 1 SV 1	Regular	112.984	13.26	62982.8	10	6	44	5.32	25107	14625	8277	3.3426	0.2105	Red
7742	P54868	HMCS2_HUMAN	Hydroxymethylglutaryl CoA synthase mitochondrial OS Homo sapiens GN HMGCS2 PE 1 SV 1	Regular	112.346	13.42	57148.8	13	6	33	3.94	80810	5585.42	15350	1.2766	0.073	Green	7741
942	O95996	APC2_HUMAN	Adenomatous polyposis coli protein 2 OS Homo sapiens GN APC2 PE 1 SV 1	Regular	112.18	13.39	246116	20	9	203	1.61	83430	5098	20908	1.1652	0.2868	Green	11792 13788 17275 16350
14608	Q9NVN3	RIC8B_HUMAN	Synembryn B OS Homo sapiens GN RIC8B PE 1 SV 2	Regular	111.078	13.72	59623.2	16	5	41	5.19	151549	196719	37254	44.9615	2.6808	Red
1174	Q9ULH1	ASAP1_HUMAN	Arf GAP with SH3 domain ANK repeat and PH domain containing protein 1 OS Homo sapiens GN ASAP1 PE 1	Regular	110.939	13.69	126468	33	13	80	4.96	56706	23445	31195	5.3585	0.6777	Yellow
17507	Q9Y4G6	TLN2_HUMAN	Talin 2 OS Homo sapiens GN TLN2 PE 1 SV 4	Regular	110.852	13.66	273952	46	21	201	3.97	93562	8731	34006	1.9955	0.5467	Green	17506
13943	P18433	PTPRA_HUMAN	Receptor type tyrosine protein phosphatase alpha OS Homo sapiens GN PTPRA PE 1 SV 2	Regular	109.71	14.17	91512.5	12	7	65	6.98	53222	43182	14327	9.8696	0.9032	Red
6593	Q9BQS8	FYCO1_HUMAN	FYVE and coiled coil domain containing protein 1 OS Homo sapiens GN FYCO1 PE 1 SV 3	Regular	109.514	14.14	168694	27	13	150	4.33	49829	9261	23077	2.1167	0.3571	Red
7313	Q9ULK0	GRID1_HUMAN	Glutamate receptor delta 1 subunit OS Homo sapiens GN GRID1 PE 2 SV 2	Regular	107.869	14.46	113101	16	7	75	3.67	58588	16596	14398	3.7931	0.429	Red
6511	Q8WU20	FRS2_HUMAN	Fibroblast growth factor receptor substrate 2 OS Homo sapiens GN FRS2 PE 1 SV 4	Regular	107.232	14.78	57428.3	16	9	53	7.87	57540	18792	16503	4.295	0.2467	Red
8102	P48735	IDHP_HUMAN	Isocitrate dehydrogenase NADP mitochondrial OS Homo sapiens GN IDH2 PE 1 SV 2	Regular	107.164	14.75	51365.6	17	7	36	14.6	25845	13876	13638	3.1715	0.1629	Red
2102	P07384	CAN1_HUMAN	Calpain 1 catalytic subunit OS Homo sapiens GN CAPN1 PE 1 SV 1	Regular	107.073	14.89	82517.5	15	7	62	6.86	35597	10333	9355	2.3617	0.1949	Red
11641	O95502	NPTXR_HUMAN	Neuronal pentraxin receptor OS Homo sapiens GN NPTXR PE 2 SV 2	Regular	106.954	14.86	53302.5	7	4	34	8.8	24744	22800	4250	5.2111	0.2778	Red
6606	Q9UM11	FZR_HUMAN	Fizzy related protein homolog OS Homo sapiens GN FZR1 PE 1 SV 2	Regular	106.688	15.34	55578.6	12	3	42	10.28	19784	19784	8208	4.5218	0.2513	Red
9431	Q659C4	LAR1B_HUMAN	La related protein 1B OS Homo sapiens GN LARP1B PE 1 SV 2	Regular	106.352	15.31	105836	17	8	78	6.13	32207	14708	16601	3.3616	0.3558	Yellow	397 395 1761 396 394
11687	P48552	NRIP1_HUMAN	Nuclear receptor interacting protein 1 OS Homo sapiens GN NRIP1 PE 1 SV 2	Regular	106.04	15.61	127741	19	12	97	3.8	223698	174024	36079	39.7744	5.0808	Red
2449	Q8IWF9	CCD83_HUMAN	Coiled coil domain containing protein 83 OS Homo sapiens GN CCDC83 PE 2 SV 2	Regular	104.765	16.41	48964.7	7	4	50	4.36	53429	11721	4087	2.6789	0.1312	Red
20095	Q96IR2	ZN845_HUMAN	Zinc finger protein 845 OS Homo sapiens GN ZNF845 PE 2 SV 3	Regular	104.537	16.37	116782	9	5	75	4.85	34877	17040.5	8520	3.8947	0.4548	Red	19831 19774 20004
18126	Q7Z4N2	TRPM1_HUMAN	Transient receptor potential cation channel subfamily M member 1 OS Homo sapiens GN TRPM1 PE 1 SV 2	Regular	104.051	16.34	183547	24	10	126	4.68	66440	41768	20866	9.5464	1.7522	Yellow
10004	Q9Y250	LZTS1_HUMAN	Leucine zipper putative tumor suppressor 1 OS Homo sapiens GN LZTS1 PE 1 SV 3	Regular	103.264	16.31	67012.2	22	8	51	6.71	24753	11256	12992	2.5726	0.1724	Red
11008	P52179	MYOM1_HUMAN	Myomesin 1 OS Homo sapiens GN MYOM1 PE 1 SV 2	Regular	103.05	16.28	189109	41	14	148	4.09	87606	17185	22293	3.9278	0.7428	Yellow
5164	Q9Y2J2	E41L3_HUMAN	Band 4 1 like protein 3 OS Homo sapiens GN EPB41L3 PE 1 SV 2	Regular	102.315	16.41	121533	19	10	91	6.26	35134	10744	12354	2.4556	0.2984	Red
8459	P46940	IQGA1_HUMAN	Ras GTPase activating like protein IQGAP1 OS Homo sapiens GN IQGAP1 PE 1 SV 1	Regular	102.291	16.38	189880	38	18	116	9.23	193733	110369	31826	25.2256	4.7898	Red	2402 36109 25694
18937	O75717	WDHD1_HUMAN	WD repeat and HMG box DNA binding protein 1 OS Homo sapiens GN WDHD1 PE 1 SV 1	Regular	101.041	16.67	127450	12	9	82	3.37	31406	5911	19511	1.351	0.1722	Red
1261	P50993	AT1A2_HUMAN	Sodium potassium transporting ATPase subunit alpha 2 OS Homo sapiens GN ATP1A2 PE 1 SV 1	Regular	100.833	16.79	113577	17	9	76	5.98	48088	26157	21739	5.9784	0.679	Red	1260 1254 1262
15468	Q15020	SART3_HUMAN	Squamous cell carcinoma antigen recognized by T cells 3 OS Homo sapiens GN SART3 PE 1 SV 1	Regular	100.006	16.76	110790	18	9	75	3.12	43564	10300	9335	2.3541	0.2608	Red
1061	Q9NZN5	ARHGC_HUMAN	Rho guanine nucleotide exchange factor 12 OS Homo sapiens GN ARHGEF12 PE 1 SV 1	Regular	99.9085	17.05	174202	24	13	123	3.82	33972	13848	18636	3.1651	0.5514	Red
18603	Q8IX04	UEVLD_HUMAN	Ubiquitin conjugating enzyme E2 variant 3 OS Homo sapiens GN UEVLD PE 1 SV 2	Regular	99.3656	17.64	52549.2	10	6	40	4.25	13887	8118	12851	1.8554	0.0975	Red
2128	Q9BXL6	CAR14_HUMAN	Caspase recruitment domain containing protein 14 OS Homo sapiens GN CARD14 PE 1 SV 2	Regular	98.5155	17.91	114924	17	10	100	3.39	78313	6651	29468	1.5201	0.1747	Yellow	10996 18823 15042
4425	Q96NX9	DACH2_HUMAN	Dachshund homolog 2 OS Homo sapiens GN DACH2 PE 2 SV 1	Regular	98.1625	18.33	65665.2	10	4	42	4.67	7117	6100	6327	1.3942	0.0916	Red
6558	P51993	FUT6_HUMAN	Alpha 1 3 fucosyltransferase OS Homo sapiens GN FUT6 PE 1 SV 1	Regular	97.8445	18.45	42316.1	7	3	25	10.58	9430	9430	3451	2.1553	0.0912	Red
10360	Q14D04	MELT_HUMAN	Ventricular zone expressed PH domain containing protein homolog 1 OS Homo sapiens GN VEPH1 PE 1 SV 1	Regular	97.3452	18.57	95543.9	14	6	65	3.96	31056	12110	19306	2.7678	0.2644	Red
15485	Q9Y2G9	SBNO2_HUMAN	Protein strawberry notch homolog 2 OS Homo sapiens GN SBNO2 PE 2 SV 3	Regular	97.0758	18.53	151644	28	11	88	4.39	39127	11187.9	26825	2.5571	0.3878	Red	15484
7646	Q15751	HERC1_HUMAN	Probable E3 ubiquitin protein ligase HERC1 OS Homo sapiens GN HERC1 PE 1 SV 2	Regular	96.7521	18.8	539129	23	20	313	1.4	83319	14654.9	28770	3.3495	1.8058	Green	13773 13795
18109	Q9UJA5	TRM6_HUMAN	tRNA adenine 58 N 1 methyltransferase non catalytic subunit TRM6 OS Homo sapiens GN TRMT6 PE 1 S	Regular	93.6271	20.21	56084.5	9	4	43	4.83	30107	12307.5	13429	2.813	0.1578	Red
5675	Q5T8I3	F102B_HUMAN	Protein FAM102B OS Homo sapiens GN FAM102B PE 1 SV 2	Regular	93.5286	20.32	39935.7	5	3	29	10.28	15650	8512.5	4142	1.9456	0.0777	Red
7432	Q9NYZ3	GTSE1_HUMAN	G2 and S phase expressed protein 1 OS Homo sapiens GN GTSE1 PE 1 SV 3	Regular	93.3919	20.28	77158.1	15	8	58	3.19	21225	3579	12529	0.818	0.0631	Red
5644	Q8IYI6	EXOC8_HUMAN	Exocyst complex component 8 OS Homo sapiens GN EXOC8 PE 1 SV 2	Regular	93.2709	20.25	82483.6	19	8	70	4	25641	9743	16811	2.2268	0.1837	Red
934	O95704	APBB3_HUMAN	Amyloid beta A4 precursor protein binding family B member 3 OS Homo sapiens GN APBB3 PE 1 SV 2	Regular	92.0978	20.49	53497.6	5	2	37	3.91	17941	24322.5	2458	5.5591	0.2974	Red
912	Q13367	AP3B2_HUMAN	AP 3 complex subunit beta 2 OS Homo sapiens GN AP3B2 PE 1 SV 2	Regular	92.0524	20.46	119687	26	12	91	7.21	40998	22777	18318	5.2058	0.6231	Red	911
5200	Q5VYK3	ECM29_HUMAN	Proteasome associated protein ECM29 homolog OS Homo sapiens GN ECM29 PE 1 SV 2	Regular	91.8915	20.42	206116	43	20	138	7.7	191853	130770	52891	29.8884	6.1605	Red
4192	O14578	CTRO_HUMAN	Citron Rho interacting kinase OS Homo sapiens GN CIT PE 1 SV 2	Regular	91.7388	20.39	233484	34	22	184	5.13	69922	10651	45933	2.4344	0.5684	Red
9781	Q8IUZ0	LRC49_HUMAN	Leucine rich repeat containing protein 49 OS Homo sapiens GN LRRC49 PE 2 SV 2	Regular	90.6096	21.45	79407.5	14	9	50	3.79	47424	13158	15293	3.0074	0.2388	Red
11765	Q16288	NTRK3_HUMAN	NT 3 growth factor receptor OS Homo sapiens GN NTRK3 PE 1 SV 2	Regular	90.0734	21.55	95797	11	6	55	8.1	13823	5128	11261	1.172	0.1123	Red
15856	Q5VZ18	SHE_HUMAN	SH2 domain containing adapter protein E OS Homo sapiens GN SHE PE 2 SV 1	Regular	89.8253	21.78	54292.5	5	2	39	7.47	5205	7807.5	3424	1.7845	0.0969	Red
4437	P53355	DAPK1_HUMAN	Death associated protein kinase 1 OS Homo sapiens GN DAPK1 PE 1 SV 6	Regular	89.6093	21.88	162042	27	13	112	5.94	52863	26142	17254	5.9749	0.9682	Red
18791	O60504	VINEX_HUMAN	Vinexin OS Homo sapiens GN SORBS3 PE 1 SV 2	Regular	89.5548	21.98	75569.3	6	6	60	4.02	19609	6727.5	4963	1.5376	0.1162	Red
13720	O43490	PROM1_HUMAN	Prominin 1 OS Homo sapiens GN PROM1 PE 1 SV 1	Regular	89.0288	22.47	98456.8	16	8	62	5.78	36023	19970	17825	4.5643	0.4494	Red
3263	Q9HCM1	CL035_HUMAN	Uncharacterized protein C12orf35 OS Homo sapiens GN C12orf35 PE 1 SV 3	Regular	88.4142	22.69	196682	33	16	146	5.44	111298	33910	30781	7.7504	1.5244	Red
18269	P53804	TTC3_HUMAN	E3 ubiquitin protein ligase TTC3 OS Homo sapiens GN TTC3 PE 1 SV 2	Regular	88.3517	22.78	233006	37	17	144	5.83	60588	30796	26199	7.0386	1.64	Red
7109	Q14789	GOGB1_HUMAN	Golgin subfamily B member 1 OS Homo sapiens GN GOLGB1 PE 1 SV 2	Regular	88.3319	22.74	377445	68	41	362	5.28	542765	66773	123004	15.2614	5.7604	Red	2770
10998	Q9NQX4	MYO5C_HUMAN	Unconventional myosin Vc OS Homo sapiens GN MYO5C PE 1 SV 2	Regular	87.941	23.09	204122	34	18	147	6.72	144387	67777.4	36799	15.491	3.1621	Red	10996 10984 10997 10960 10959
4898	Q96BY6	DOC10_HUMAN	Dedicator of cytokinesis protein 10 OS Homo sapiens GN DOCK10 PE 1 SV 3	Regular	87.6692	23.18	251984	43	25	167	6.5	152103	22629	46749	5.172	1.3033	Red	4910 4899
5275	Q63HQ2	EGFLA_HUMAN	Pikachurin OS Homo sapiens GN EGFLAM PE 1 SV 2	Regular	87.0354	23.39	113039	22	10	74	4.52	30245	7264	13162	1.6602	0.1877	Red
783	Q9Y264	ANGP4_HUMAN	Angiopoietin 4 OS Homo sapiens GN ANGPT4 PE 1 SV 1	Regular	86.7608	23.61	57361.9	8	4	41	9.54	27164	24697	5773	5.6447	0.3238	Red
16649	Q9P246	STIM2_HUMAN	Stromal interaction molecule 2 OS Homo sapiens GN STIM2 PE 1 SV 2	Regular	86.2937	23.82	84826.7	12	7	55	7.77	19250	10340	11740	2.3633	0.2005	Red
2688	Q9BWU1	CDK19_HUMAN	Cyclin dependent kinase 19 OS Homo sapiens GN CDK19 PE 1 SV 1	Regular	86.2679	23.78	57087.5	5	3	40	2.39	12163	16260	3247	3.7163	0.2122	Red
16089	Q8TAQ2	SMRC2_HUMAN	SWI SNF complex subunit SMARCC2 OS Homo sapiens GN SMARCC2 PE 1 SV 1	Regular	85.9486	23.86	133279	23	9	101	5.68	41844	21012	21027	4.8024	0.6401	Red	16088
8224	Q8N9C0	IGS22_HUMAN	Immunoglobulin superfamily member 22 OS Homo sapiens GN IGSF22 PE 1 SV 2	Regular	85.7787	23.82	100971	13	6	76	5.87	21034	6703	7814	1.532	0.1547	Red
16445	O15020	SPTN2_HUMAN	Spectrin beta chain non erythrocytic 2 OS Homo sapiens GN SPTBN2 PE 1 SV 3	Regular	85.6476	23.79	272694	43	23	221	4.64	149445	52008	51278	11.8868	3.2415	Yellow	15173 11207 26352 18164 16439 7348
2452	Q9NVE4	CCD87_HUMAN	Coiled coil domain containing protein 87 OS Homo sapiens GN CCDC87 PE 2 SV 2	Regular	85.3098	23.87	96801.5	14	10	72	1.88	26320	3453	9148	0.7892	0.0764	Red
793	Q8NFD2	ANKK1_HUMAN	Ankyrin repeat and protein kinase domain containing protein 1 OS Homo sapiens GN ANKK1 PE 1 SV 1	Regular	85.1392	23.83	85431	9	4	52	5.49	26562	25786	8141	5.8936	0.5035	Red
5034	P32926	DSG3_HUMAN	Desmoglein 3 OS Homo sapiens GN DSG3 PE 1 SV 2	Regular	85.0997	23.79	108902	18	8	64	5.91	34356	7017	20901	1.6038	0.1747	Red
18090	Q8N9V2	TRIML_HUMAN	Probable E3 ubiquitin protein ligase TRIML1 OS Homo sapiens GN TRIML1 PE 1 SV 1	Regular	84.7517	23.88	53857.4	8	5	33	3.85	29132	7801.5	4990	1.7831	0.096	Red
14292	P78332	RBM6_HUMAN	RNA binding protein 6 OS Homo sapiens GN RBM6 PE 1 SV 5	Regular	84.7187	23.84	129271	23	15	152	4.99	57072	17609	17041	4.0247	0.5203	Red
3641	Q9P218	COKA1_HUMAN	Collagen alpha 1 XX chain OS Homo sapiens GN COL20A1 PE 1 SV 4	Regular	84.6065	24.04	136572	14	5	93	3.19	30393	24168	15290	5.5238	0.7544	Yellow
17087	Q9NVG8	TBC13_HUMAN	TBC1 domain family member 13 OS Homo sapiens GN TBC1D13 PE 1 SV 3	Regular	83.8573	24.13	47180.9	6	5	44	10.5	18298	11797	4800	2.6963	0.1272	Red
9852	Q5S007	LRRK2_HUMAN	Leucine rich repeat serine threonine protein kinase 2 OS Homo sapiens GN LRRK2 PE 1 SV 2	Regular	83.805	24.09	289753	36	17	195	3.32	391847	314848	86534	71.9607	20.8508	Red
10153	Q96JE9	MAP6_HUMAN	Microtubule associated protein 6 OS Homo sapiens GN MAP6 PE 1 SV 2	Regular	83.4977	24.05	86733.5	15	6	107	2.58	41294	4356	11859	0.9956	0.0864	Red
10958	Q9Y2K3	MYH15_HUMAN	Myosin 15 OS Homo sapiens GN MYH15 PE 1 SV 5	Regular	82.6497	24.96	226045	46	26	170	6.68	178563	27130	48745	6.2008	1.4016	Red	11002 10966 10956 10964 14304 10959 10962 10961 10963 13526 10960 10965
6797	Q92616	GCN1L_HUMAN	Translational activator GCN1 OS Homo sapiens GN GCN1L1 PE 1 SV 6	Regular	82.5814	24.92	295154	40	22	225	5.13	117757	52568	35686	12.0148	3.5462	Red
8893	Q9H252	KCNH6_HUMAN	Potassium voltage gated channel subfamily H member 6 OS Homo sapiens GN KCNH6 PE 1 SV 1	Regular	82.4587	24.88	111237	12	5	57	2.31	54260	38873	18152	8.8847	0.9883	Yellow
2123	Q86UW7	CAPS2_HUMAN	Calcium dependent secretion activator 2 OS Homo sapiens GN CADPS2 PE 1 SV 2	Regular	82.4413	24.84	148989	23	13	102	3.47	60184	7178	25226	1.6406	0.2444	Red	2122
6405	Q9P278	FNIP2_HUMAN	Folliculin interacting protein 2 OS Homo sapiens GN FNIP2 PE 1 SV 2	Regular	82.0349	24.81	123712	12	7	81	4.22	30774	9948	10829	2.2737	0.2813	Red
15676	O75326	SEM7A_HUMAN	Semaphorin 7A OS Homo sapiens GN SEMA7A PE 1 SV 1	Regular	82.0302	24.77	75907.4	14	7	49	8.41	45876	7506	16615	1.7155	0.1302	Red
13043	P00439	PH4H_HUMAN	Phenylalanine 4 hydroxylase OS Homo sapiens GN PAH PE 1 SV 1	Regular	82.0204	24.73	52375.4	14	6	40	3.32	69117	21865.5	17969	4.9975	0.2617	Red
14426	Q9UBZ9	REV1_HUMAN	DNA repair protein REV1 OS Homo sapiens GN REV1 PE 1 SV 1	Regular	81.9312	24.69	139446	27	12	86	5.92	101535	40549	25352	9.2678	1.2924	Red
1268	O14983	AT2A1_HUMAN	Sarcoplasmic endoplasmic reticulum calcium ATPase 1 OS Homo sapiens GN ATP2A1 PE 1 SV 1	Regular	81.826	24.77	111621	12	12	72	3.2	34936	8668.88	19026	1.9813	0.2212	Red	1270 1269
4662	P15924	DESP_HUMAN	Desmoplakin OS Homo sapiens GN DSP PE 1 SV 3	Regular	81.7977	24.73	334227	70	37	266	5.43	232419	71864	68341	16.425	5.4897	Red
3771	Q9BV73	CP250_HUMAN	Centrosome associated protein CEP250 OS Homo sapiens GN CEP250 PE 1 SV 2	Regular	81.7054	24.69	282050	39	20	280	5.65	179453	31063	40680	7.0997	2.0025	Yellow
16626	P49675	STAR_HUMAN	Steroidogenic acute regulatory protein mitochondrial OS Homo sapiens GN STAR PE 1 SV 2	Regular	81.181	24.89	32199.1	3	3	27	6.67	16051	2961	3237	0.6768	0.0218	Red
8186	Q9NWB7	IFT57_HUMAN	Intraflagellar transport protein 57 homolog OS Homo sapiens GN IFT57 PE 1 SV 1	Regular	81.0189	24.96	49279.5	10	5	30	11.66	38692	20943	7428	4.7867	0.2359	Red
17816	O95271	TNKS1_HUMAN	Tankyrase 1 OS Homo sapiens GN TNKS PE 1 SV 2	Regular	81.0109	24.92	143808	28	17	100	7.84	83381	14829	26156	3.3893	0.4874	Red
2374	Q8IYT3	CC170_HUMAN	Coiled coil domain containing protein 170 OS Homo sapiens GN CCDC170 PE 2 SV 3	Regular	80.3191	25.34	82904.2	13	7	84	2.66	22182	12015	8062	2.7461	0.2277	Red
13195	P42336	PK3CA_HUMAN	Phosphatidylinositol 4 5 bisphosphate 3 kinase catalytic subunit alpha isoform OS Homo sapiens GN PI	Regular	80.3005	25.3	126109	15	7	102	2.53	46940	18373	8037	4.1993	0.5296	Yellow
17893	Q8TEL6	TP4AP_HUMAN	Short transient receptor potential channel 4 associated protein OS Homo sapiens GN TRPC4AP PE 1 SV 2	Regular	80.1483	25.38	91821.7	12	6	66	7.28	33230	17035	10974	3.8935	0.3575	Red
18964	Q8TAF3	WDR48_HUMAN	WD repeat containing protein 48 OS Homo sapiens GN WDR48 PE 1 SV 1	Regular	79.6768	25.56	77066	10	5	51	4.28	28197	37129.5	19374	8.4862	0.654	Red
14607	Q9NPQ8	RIC8A_HUMAN	Synembryn A OS Homo sapiens GN RIC8A PE 1 SV 3	Regular	79.2924	25.52	60222.9	9	4	39	4.14	19231	4429.5	10534	1.0124	0.061	Red
19599	Q96KR1	ZFR_HUMAN	Zinc finger RNA binding protein OS Homo sapiens GN ZFR PE 1 SV 2	Regular	78.7019	25.82	118153	19	8	71	4.47	64518	14055	21307	3.2124	0.3796	Red
3300	O75122	CLAP2_HUMAN	CLIP associating protein 2 OS Homo sapiens GN CLASP2 PE 1 SV 2	Regular	78.5211	25.78	141931	23	14	112	6.88	52270	15664	16562	3.5801	0.5081	Red
18508	Q96RU2	UBP28_HUMAN	Ubiquitin carboxyl terminal hydrolase 28 OS Homo sapiens GN USP28 PE 1 SV 1	Regular	78.4976	25.74	123632	23	12	83	4.92	65520	8284	16960	1.8934	0.2341	Red
555	Q9UL18	AGO1_HUMAN	Protein argonaute 1 OS Homo sapiens GN EIF2C1 PE 1 SV 3	Regular	78.4432	25.7	98355	18	11	70	7.12	34369	21331	11847	4.8754	0.4795	Red	558
5978	Q5JRC9	FA47A_HUMAN	Protein FAM47A OS Homo sapiens GN FAM47A PE 1 SV 3	Regular	78.281	25.66	91619.1	9	6	61	2.91	15116	7423.5	6580	1.6967	0.1554	Red	5981
14241	Q8IUD2	RB6I2_HUMAN	ELKS Rab6 interacting CAST family member 1 OS Homo sapiens GN ERC1 PE 1 SV 1	Regular	78.2194	25.74	128315	30	15	132	1.7	58384	8845.5	17435	2.0217	0.2594	Red	5520
14018	P11217	PYGM_HUMAN	Glycogen phosphorylase muscle form OS Homo sapiens GN PYGM PE 1 SV 6	Regular	77.8813	25.92	97548.5	22	14	75	5.82	105706	15064	18695	3.443	0.3359	Red
10774	O15457	MSH4_HUMAN	MutS protein homolog 4 OS Homo sapiens GN MSH4 PE 2 SV 2	Regular	77.7413	26.09	105839	17	11	67	7.8	39367	16815	17044	3.8432	0.4068	Red
16888	Q9NUJ3	T11L1_HUMAN	T complex protein 11 like protein 1 OS Homo sapiens GN TCP11L1 PE 1 SV 1	Regular	77.5302	26.06	57377.2	13	4	42	6.88	36159	42223.5	12661	9.6505	0.5537	Red
19564	Q5T1R4	ZEP3_HUMAN	Transcription factor HIVEP3 OS Homo sapiens GN HIVEP3 PE 1 SV 1	Regular	77.3095	26.12	261290	23	8	163	3.41	24895	16165	27236	3.6946	0.9654	Red
5125	Q8NCM8	DYHC2_HUMAN	Cytoplasmic dynein 2 heavy chain 1 OS Homo sapiens GN DYNC2H1 PE 1 SV 4	Regular	76.9198	26.62	496101	66	32	346	3.3	166328	19652	52191	4.4916	2.2283	Red	39234 26594 18092 5122 31963 1302 968 13591 31173 38504 16651 9024 5119 17431
13066	Q92576	PHF3_HUMAN	PHD finger protein 3 OS Homo sapiens GN PHF3 PE 1 SV 3	Regular	76.6857	26.58	231706	17	14	178	3.43	56427	28856	22531	6.5952	1.5282	Red
3668	P53621	COPA_HUMAN	Coatomer subunit alpha OS Homo sapiens GN COPA PE 1 SV 2	Regular	76.5453	26.65	139886	20	12	101	3.35	87575	20319	14680	4.6441	0.6496	Red	30640 38977
19044	Q9Y3S1	WNK2_HUMAN	Serine threonine protein kinase WNK2 OS Homo sapiens GN WNK2 PE 1 SV 4	Regular	76.249	26.82	244444	28	14	129	5.09	77899	39994	23021	9.1409	2.2344	Red	19043
16655	Q9Y6E0	STK24_HUMAN	Serine threonine protein kinase 24 OS Homo sapiens GN STK24 PE 1 SV 1	Regular	76.1639	26.78	49593.2	5	4	40	4.51	14995	16438.5	9202	3.7571	0.1863	Red
4648	Q5TB30	DEP1A_HUMAN	DEP domain containing protein 1A OS Homo sapiens GN DEPDC1 PE 1 SV 2	Regular	75.8205	26.95	93986.2	17	6	66	3.7	29420	20262	8807	4.631	0.4353	Red
14972	O00411	RPOM_HUMAN	DNA directed RNA polymerase mitochondrial OS Homo sapiens GN POLRMT PE 1 SV 2	Regular	75.6359	27.32	140388	19	10	95	5.2	74931	57766	22684	13.2028	1.8535	Red
7570	Q99714	HCD2_HUMAN	3 hydroxyacyl CoA dehydrogenase type 2 OS Homo sapiens GN HSD17B10 PE 1 SV 3	Regular	75.3285	27.59	27151.2	5	3	17	16.48	7638	6596	3666	1.5076	0.0409	Red
15556	Q96I15	SCLY_HUMAN	Selenocysteine lyase OS Homo sapiens GN SCLY PE 1 SV 2	Regular	75.321	27.55	48434	9	5	36	8.54	29900	20330	8346	4.6466	0.2251	Red
3549	Q7Z7A1	CNTRL_HUMAN	Centriolin OS Homo sapiens GN CNTRL PE 1 SV 2	Regular	75.1546	27.51	270027	37	22	220	4.22	123535	25960	37089	5.9333	1.6022	Red
7676	Q04756	HGFA_HUMAN	Hepatocyte growth factor activator OS Homo sapiens GN HGFAC PE 1 SV 1	Regular	75.1367	27.48	72905.9	7	3	35	5.34	4386	4386	5062	1.0025	0.0731	Red
12728	Q96JQ0	PCD16_HUMAN	Protocadherin 16 OS Homo sapiens GN DCHS1 PE 2 SV 1	Regular	75.0916	27.44	346923	42	16	182	2.61	115457	17397.1	48835	3.9762	1.3794	Yellow	2812
8658	A3KMH1	K0564_HUMAN	Uncharacterized protein KIAA0564 OS Homo sapiens GN KIAA0564 PE 1 SV 2	Regular	75.0044	27.4	215851	32	14	176	2.2	135377	63242	46976	14.4544	3.12	Red
17949	P12270	TPR_HUMAN	Nucleoprotein TPR OS Homo sapiens GN TPR PE 1 SV 3	Regular	74.9987	27.36	267692	47	25	200	4.7	257468	61356	53548	14.0234	3.7539	Red
14511	O43566	RGS14_HUMAN	Regulator of G protein signaling 14 OS Homo sapiens GN RGS14 PE 1 SV 4	Regular	74.9867	27.32	61960.3	11	5	48	7.24	37453	13957	7305	3.19	0.1977	Red
18629	O14795	UN13B_HUMAN	Protein unc 13 homolog B OS Homo sapiens GN UNC13B PE 1 SV 2	Regular	74.816	27.39	182789	30	16	143	5.47	109327	26810	36013	6.1276	1.1201	Red
14021	P27708	PYR1_HUMAN	CAD protein OS Homo sapiens GN CAD PE 1 SV 3	Regular	74.6288	27.55	245322	31	18	141	6.11	107274	31369	31331	7.1696	1.7589	Red
15199	Q9UHW9	S12A6_HUMAN	Solute carrier family 12 member 6 OS Homo sapiens GN SLC12A6 PE 1 SV 2	Regular	74.2225	27.51	128701	20	8	78	5.22	51838	15179	14819	3.4693	0.4465	Red
19831	Q5VIY5	ZN468_HUMAN	Zinc finger protein 468 OS Homo sapiens GN ZNF468 PE 2 SV 1	Regular	73.9383	27.47	62340.7	9	3	47	4.21	23539	10608.2	9050	2.4246	0.1511	Red	20095 19774 20004
18900	Q502W6	VWA3B_HUMAN	von Willebrand factor A domain containing protein 3B OS Homo sapiens GN VWA3B PE 2 SV 3	Regular	73.8705	27.63	147117	20	11	117	3.63	48125	19385	15607	4.4306	0.6518	Red
8390	Q96T92	INSM2_HUMAN	Insulinoma associated protein 2 OS Homo sapiens GN INSM2 PE 1 SV 3	Regular	73.7675	27.6	60517.9	8	5	46	5.3	20588	4722	7138	1.0792	0.0653	Red
15845	Q9UPX8	SHAN2_HUMAN	SH3 and multiple ankyrin repeat domains protein 2 OS Homo sapiens GN SHANK2 PE 1 SV 3	Regular	73.3649	28.05	159335	14	8	102	4.01	66890	56359	29773	12.8813	2.0524	Red
2770	O15078	CE290_HUMAN	Centrosomal protein of 290 kDa OS Homo sapiens GN CEP290 PE 1 SV 2	Regular	73.2978	28.21	291071	56	33	293	4.2	150560	30228	47956	6.9088	2.011	Red	7109
19415	Q96LW1	Z354B_HUMAN	Zinc finger protein 354B OS Homo sapiens GN ZNF354B PE 2 SV 1	Regular	73.0663	28.17	72411.3	11	6	45	2.12	32526	5937	9075	1.3569	0.0983	Red
10964	A7E2Y1	MYH7B_HUMAN	Myosin 7B OS Homo sapiens GN MYH7B PE 2 SV 3	Regular	73.0231	28.13	222529	36	20	162	5.51	70631	22168	28965	5.0667	1.1275	Red	10962 11002 10966 10961 10956 10963 10960 10959 10958 10965
13695	P78527	PRKDC_HUMAN	DNA dependent protein kinase catalytic subunit OS Homo sapiens GN PRKDC PE 1 SV 3	Regular	73.0109	28.09	474051	79	38	352	4.36	139438	21491	64022	4.9119	2.3285	Red
1209	Q9NR48	ASH1L_HUMAN	Histone lysine N methyltransferase ASH1L OS Homo sapiens GN ASH1L PE 1 SV 2	Regular	72.8691	28.15	336383	39	19	241	3.33	103043	39179	33894	8.9546	3.0122	Red
5288	Q9H4M9	EHD1_HUMAN	EH domain containing protein 1 OS Homo sapiens GN EHD1 PE 1 SV 2	Regular	72.6148	28.11	60684	9	5	48	5.06	50477	45433	4633	10.384	0.6301	Red
11102	P43490	NAMPT_HUMAN	Nicotinamide phosphoribosyltransferase OS Homo sapiens GN NAMPT PE 1 SV 1	Regular	72.3126	28.17	55806.3	10	4	47	3.05	17925	9912	7062	2.2655	0.1264	Red
16232	Q07890	SOS2_HUMAN	Son of sevenless homolog 2 OS Homo sapiens GN SOS2 PE 1 SV 2	Regular	72.2644	28.13	154348	23	11	114	2.03	77432	41613	17466	9.5109	1.468	Red	16231
1803	Q06187	BTK_HUMAN	Tyrosine protein kinase BTK OS Homo sapiens GN BTK PE 1 SV 3	Regular	72.1519	28.19	76965.7	9	7	62	8.8	27866	18386	7723	4.2023	0.3234	Red
18092	O75962	TRIO_HUMAN	Triple functional domain protein OS Homo sapiens GN TRIO PE 1 SV 2	Regular	72.138	28.25	349980	32	18	249	2.26	243229	139754	34492	31.9418	11.179	Yellow	33880 39234 5125 26594 8780 31963 1302 968 13591 31173 38504 16651 17431
3983	Q5TZA2	CROCC_HUMAN	Rootletin OS Homo sapiens GN CROCC PE 1 SV 1	Regular	71.6385	28.78	228923	33	21	219	4.56	139222	35216	36201	8.0489	1.8426	Red
15966	O75563	SKAP2_HUMAN	Src kinase associated phosphoprotein 2 OS Homo sapiens GN SKAP2 PE 1 SV 1	Regular	71.6055	28.74	41445	7	4	32	5.29	23988	27189	10664	6.2142	0.2575	Red
17264	P24821	TENA_HUMAN	Tenascin OS Homo sapiens GN TNC PE 1 SV 3	Regular	71.4889	28.89	246499	29	15	153	4.27	96566	23442	20094	5.3578	1.3207	Red
18850	Q9Y4B6	VPRBP_HUMAN	Protein VPRBP OS Homo sapiens GN VPRBP PE 1 SV 3	Regular	71.4708	28.94	170775	13	8	105	6.1	49945	25333	24474	5.79	0.9888	Red
2434	Q8IXS2	CCD65_HUMAN	Coiled coil domain containing protein 65 OS Homo sapiens GN CCDC65 PE 1 SV 2	Regular	71.4385	29	57411	5	5	52	5.37	16491	8367	5304	1.9123	0.1098	Red
5806	Q8NB25	F184A_HUMAN	Protein FAM184A OS Homo sapiens GN FAM184A PE 2 SV 3	Regular	71.288	28.96	133193	21	13	130	9.04	68275	19403	14775	4.4347	0.5907	Red
4906	Q9H7D0	DOCK5_HUMAN	Dedicator of cytokinesis protein 5 OS Homo sapiens GN DOCK5 PE 1 SV 3	Regular	71.1694	28.92	216336	32	17	156	3.85	107758	10905	24072	2.4924	0.5392	Red
7930	Q7Z6Z7	HUWE1_HUMAN	E3 ubiquitin protein ligase HUWE1 OS Homo sapiens GN HUWE1 PE 1 SV 3	Regular	71.1373	28.89	485826	42	23	305	2.7	129181	21503	45349	4.9147	2.3877	Red
2346	Q96JN2	CC136_HUMAN	Coiled coil domain containing protein 136 OS Homo sapiens GN CCDC136 PE 2 SV 3	Regular	70.9227	28.94	135699	22	13	118	6.41	70905	25072	18926	5.7304	0.7776	Red
16826	Q6ZMZ3	SYNE3_HUMAN	Nesprin 3 OS Homo sapiens GN C14orf49 PE 1 SV 2	Regular	70.7634	28.9	112844	16	8	87	5.64	47409	9869	10268	2.2556	0.2545	Red
16498	P09132	SRP19_HUMAN	Signal recognition particle 19 kDa protein OS Homo sapiens GN SRP19 PE 1 SV 3	Regular	70.6453	28.87	16383.8	2	3	14	10.42	13798	2745	2425	0.6274	0.0103	Red
2254	Q9UPW5	CBPC1_HUMAN	Cytosolic carboxypeptidase 1 OS Homo sapiens GN AGTPBP1 PE 1 SV 3	Regular	70.5395	28.83	139874	26	13	94	4.08	112617	20262	38478	4.631	0.6478	Red
5823	Q9H7U1	F190B_HUMAN	Protein FAM190B OS Homo sapiens GN FAM190B PE 1 SV 2	Regular	70.1542	29.07	94232.2	15	8	49	4.8	33160	11469	8695	2.6213	0.247	Red
15362	Q9ULF5	S39AA_HUMAN	Zinc transporter ZIP10 OS Homo sapiens GN SLC39A10 PE 1 SV 2	Regular	69.9788	29.12	94987.5	10	4	42	3.97	32573	27285	16481	6.2362	0.5924	Red
8468	P48200	IREB2_HUMAN	Iron responsive element binding protein 2 OS Homo sapiens GN IREB2 PE 1 SV 3	Regular	69.7978	29.08	106071	12	6	67	4.15	91974	18774	9336	4.2909	0.4551	Red
6412	Q05932	FOLC_HUMAN	Folylpolyglutamate synthase mitochondrial OS Homo sapiens GN FPGS PE 1 SV 3	Regular	69.5261	29.49	65407.6	8	4	38	6.64	12340	5106	5244	1.167	0.0763	Red
14564	Q5T5U3	RHG21_HUMAN	Rho GTPase activating protein 21 OS Homo sapiens GN ARHGAP21 PE 1 SV 1	Regular	69.4624	29.46	218700	23	15	170	1.58	141804	29230	44711	6.6807	1.4611	Yellow	6103 18824
12654	Q9H0J9	PAR12_HUMAN	Poly ADP ribose polymerase 12 OS Homo sapiens GN PARP12 PE 1 SV 1	Regular	69.0777	29.6	80546.4	11	7	47	5.56	36433	21284	9487	4.8646	0.3918	Red
12088	Q9Y2G5	OFUT2_HUMAN	GDP fucose protein O fucosyltransferase 2 OS Homo sapiens GN POFUT2 PE 2 SV 3	Regular	69.0428	29.56	50261.1	12	6	40	9.32	16665	8087	8393	1.8483	0.0929	Red
1612	Q12934	BFSP1_HUMAN	Filensin OS Homo sapiens GN BFSP1 PE 1 SV 3	Regular	69.0196	29.52	74829.5	11	6	57	7.37	16131	6442.5	8326	1.4725	0.1102	Red
14540	Q9BYZ6	RHBT2_HUMAN	Rho related BTB domain containing protein 2 OS Homo sapiens GN RHOBTB2 PE 2 SV 2	Regular	68.9513	29.57	83653	15	8	53	6.88	113351	38072	13112	8.7016	0.7279	Red	14539
13639	Q9BXM0	PRAX_HUMAN	Periaxin OS Homo sapiens GN PRX PE 1 SV 2	Regular	68.8165	29.63	155247	16	11	92	5.27	48778	16030	15192	3.6638	0.5688	Red
19774	Q96SE7	ZN347_HUMAN	Zinc finger protein 347 OS Homo sapiens GN ZNF347 PE 1 SV 2	Regular	68.7701	29.59	98279.7	13	6	58	3.1	30046	15320	12603	3.5015	0.3441	Red	19831 20095 20004
18355	Q8N427	TXND3_HUMAN	Thioredoxin domain containing protein 3 OS Homo sapiens GN NME8 PE 1 SV 2	Regular	68.5804	29.73	67726.3	12	6	54	7.99	24279	6728	5907	1.5377	0.1041	Red
965	Q6Q788	APOA5_HUMAN	Apolipoprotein A V OS Homo sapiens GN APOA5 PE 1 SV 1	Regular	68.5263	29.69	41269.7	8	5	31	10.66	12432	6845	5335	1.5645	0.0646	Red
5121	Q8WXX0	DYH7_HUMAN	Dynein heavy chain 7 axonemal OS Homo sapiens GN DNAH7 PE 1 SV 2	Regular	68.3705	29.74	464696	65	29	327	2.96	143506	27276	61297	6.2341	2.897	Red
761	A6QL64	AN36A_HUMAN	Ankyrin repeat domain containing protein 36A OS Homo sapiens GN ANKRD36 PE 2 SV 3	Regular	68.0781	30.14	219290	38	20	216	3.61	149496	32583	29348	7.4471	1.6331	Red
19093	A4UGR9	XIRP2_HUMAN	Xin actin binding repeat containing protein 2 OS Homo sapiens GN XIRP2 PE 1 SV 2	Regular	68.026	30.27	384125	55	28	302	3.26	374180	110180	72345	25.1824	9.6732	Red
14966	Q92834	RPGR_HUMAN	X linked retinitis pigmentosa GTPase regulator OS Homo sapiens GN RPGR PE 1 SV 2	Regular	67.9679	30.23	114413	9	7	80	1.67	27907	5118	8981	1.1698	0.1338	Red
17431	Q13009	TIAM1_HUMAN	T lymphoma invasion and metastasis inducing protein 1 OS Homo sapiens GN TIAM1 PE 1 SV 2	Regular	67.9364	30.28	178820	27	13	134	4.27	148888	92101	21793	21.0503	3.7642	Red	39234 5125 26594 18092 31963 1302 968 13591 31173 38504 16651
20004	Q9NV72	ZN701_HUMAN	Zinc finger protein 701 OS Homo sapiens GN ZNF701 PE 2 SV 2	Regular	67.7316	30.33	55168.9	7	4	38	2.58	39568	0	24568			Red	19831 20095 19774
6973	P08151	GLI1_HUMAN	Zinc finger protein GLI1 OS Homo sapiens GN GLI1 PE 1 SV 1	Regular	67.7162	30.29	119672	11	7	74	6.06	22615	16584	19534	3.7904	0.4536	Red
6713	Q5JY77	GASP1_HUMAN	G protein coupled receptor associated sorting protein 1 OS Homo sapiens GN GPRASP1 PE 1 SV 3	Regular	67.603	30.26	158291	10	7	106	2.72	13287	6730	8399	1.5382	0.2435	Red
16054	Q8NDV3	SMC1B_HUMAN	Structural maintenance of chromosomes protein 1B OS Homo sapiens GN SMC1B PE 1 SV 2	Regular	67.3763	30.3	145163	21	11	120	3.08	56333	18848	27418	4.3078	0.6253	Red
14032	Q6ZMN7	PZRN4_HUMAN	PDZ domain containing RING finger protein 4 OS Homo sapiens GN PDZRN4 PE 1 SV 3	Regular	67.0595	30.35	118700	9	7	78	6.37	36193	19800.3	9315	4.5255	0.5372	Green	753
3628	Q8WTW3	COG1_HUMAN	Conserved oligomeric Golgi complex subunit 1 OS Homo sapiens GN COG1 PE 1 SV 1	Regular	66.9206	30.31	110176	10	8	75	4.9	32895	17951	10068	4.1028	0.452	Red
1244	Q8IXJ9	ASXL1_HUMAN	Putative Polycomb group protein ASXL1 OS Homo sapiens GN ASXL1 PE 1 SV 3	Regular	66.8536	30.28	167102	14	8	114	1.75	84947	26007	17323	5.9441	0.9933	Red
15484	A3KN83	SBNO1_HUMAN	Protein strawberry notch homolog 1 OS Homo sapiens GN SBNO1 PE 1 SV 1	Regular	66.741	30.41	154997	22	10	100	4.67	51730	14322.1	13418	3.2734	0.5074	Red	15485
12679	Q8IXQ6	PARP9_HUMAN	Poly ADP ribose polymerase 9 OS Homo sapiens GN PARP9 PE 1 SV 2	Regular	66.7017	30.46	97369.9	17	9	65	1.52	37395	12511.5	18491	2.8596	0.2784	Red
1254	P54707	AT12A_HUMAN	Potassium transporting ATPase alpha chain 2 OS Homo sapiens GN ATP12A PE 2 SV 3	Regular	66.4731	30.75	116366	7	5	78	2.98	19539	9847.14	18056	2.2506	0.2619	Red	1262 1261
18752	P19320	VCAM1_HUMAN	Vascular cell adhesion protein 1 OS Homo sapiens GN VCAM1 PE 1 SV 1	Regular	66.4525	30.71	82359.8	12	9	62	7.71	26182	16119	9635	3.6841	0.3034	Red
16147	Q9NRH2	SNRK_HUMAN	SNF related serine threonine protein kinase OS Homo sapiens GN SNRK PE 1 SV 2	Regular	66.3847	30.84	85188.8	18	7	62	4.84	52360	15918	12397	3.6382	0.3099	Red
6758	Q96PP8	GBP5_HUMAN	Guanylate binding protein 5 OS Homo sapiens GN GBP5 PE 2 SV 1	Regular	66.3371	30.89	67187.3	7	5	44	1.02	19792	18402	7583	4.2059	0.2826	Red
18143	Q9Y606	TRUA_HUMAN	tRNA pseudouridine synthase A mitochondrial OS Homo sapiens GN PUS1 PE 1 SV 3	Regular	66.3054	30.93	48040.4	16	7	41	11.94	70154	11374	9325	2.5996	0.1249	Red
18942	Q8IZU2	WDR17_HUMAN	WD repeat containing protein 17 OS Homo sapiens GN WDR17 PE 2 SV 2	Regular	66.2951	30.9	150213	25	11	98	5.3	32101	13213	12320	3.0199	0.4536	Red
10959	P12882	MYH1_HUMAN	Myosin 1 OS Homo sapiens GN MYH1 PE 1 SV 3	Regular	66.124	30.86	224115	44	23	162	3.87	141674	13841	40034	3.1635	0.709	Red	10996 11002 10966 10956 10964 10962 10961 10984 10963 10998 10958 10960 10965
10250	O15068	MCF2L_HUMAN	Guanine nucleotide exchange factor DBS OS Homo sapiens GN MCF2L PE 1 SV 2	Regular	65.7818	31.07	129421	21	10	98	5.72	85027	16691	23432	3.8148	0.4937	Red
6531	Q8N475	FSTL5_HUMAN	Follistatin related protein 5 OS Homo sapiens GN FSTL5 PE 2 SV 2	Regular	65.7667	31.03	97062.8	10	5	63	4.01	57289	17839	10566	4.0772	0.3957	Red
2812	Q9NYQ7	CELR3_HUMAN	Cadherin EGF LAG seven pass G type receptor 3 OS Homo sapiens GN CELSR3 PE 1 SV 2	Regular	65.2598	31.4	363090	44	21	226	3.68	130889	38620.9	30377	8.8271	3.205	Yellow	12728
17988	O00463	TRAF5_HUMAN	TNF receptor associated factor 5 OS Homo sapiens GN TRAF5 PE 1 SV 2	Regular	64.784	31.6	65945.6	8	7	52	7.72	32383	11787	9348	2.694	0.1777	Red
1956	Q5RHP9	CA173_HUMAN	Uncharacterized protein C1orf173 OS Homo sapiens GN C1orf173 PE 2 SV 1	Regular	64.7014	31.56	169151	32	13	165	3.99	185082	31174	62736	7.125	1.2052	Red
8151	P09914	IFIT1_HUMAN	Interferon induced protein with tetratricopeptide repeats 1 OS Homo sapiens GN IFIT1 PE 1 SV 2	Regular	64.6165	31.52	55816.7	3	3	38	4.39	14416	16875	4472	3.8569	0.2153	Red
4549	Q14203	DCTN1_HUMAN	Dynactin subunit 1 OS Homo sapiens GN DCTN1 PE 1 SV 3	Regular	64.2624	31.65	142436	28	14	105	4.07	89479	15261	30497	3.488	0.4968	Red	16446
17114	Q86TI0	TBCD1_HUMAN	TBC1 domain family member 1 OS Homo sapiens GN TBC1D1 PE 1 SV 2	Regular	64.1463	31.77	134396	15	8	98	4.02	38279	22841	13461	5.2205	0.7016	Red
9163	P46019	KPB2_HUMAN	Phosphorylase b kinase regulatory subunit alpha liver isoform OS Homo sapiens GN PHKA2 PE 1 SV 1	Regular	64.0225	31.73	139492	12	7	83	5.67	12007	5922	5161	1.3535	0.1888	Red
218	Q8N139	ABCA6_HUMAN	ATP binding cassette sub family A member 6 OS Homo sapiens GN ABCA6 PE 1 SV 2	Regular	63.9707	31.77	185826	14	8	98	4.08	80062	57499	11776	13.1418	2.4421	Red
9801	Q8TDW0	LRC8C_HUMAN	Leucine rich repeat containing protein 8C OS Homo sapiens GN LRRC8C PE 1 SV 2	Regular	63.653	31.89	93419.2	11	4	62	2.62	53169	12027	12071	2.7489	0.2568	Red
10869	P42345	MTOR_HUMAN	Serine threonine protein kinase mTOR OS Homo sapiens GN MTOR PE 1 SV 1	Regular	63.6278	31.85	290945	33	24	204	2.63	103697	13938	18995	3.1856	0.9268	Red
17063	Q9C0C2	TB182_HUMAN	182 kDa tankyrase 1 binding protein OS Homo sapiens GN TNKS1BP1 PE 1 SV 4	Regular	63.6191	31.82	182822	18	11	149	3.88	34811	8174	13360	1.8682	0.3416	Red	29139
18529	Q96K76	UBP47_HUMAN	Ubiquitin carboxyl terminal hydrolase 47 OS Homo sapiens GN USP47 PE 1 SV 3	Regular	63.447	32.01	158680	20	15	109	3.56	80226	10495	14862	2.3987	0.3806	Red
4595	Q86XP3	DDX42_HUMAN	ATP dependent RNA helicase DDX42 OS Homo sapiens GN DDX42 PE 1 SV 1	Regular	63.4406	31.98	103260	18	9	75	2.77	51627	27433.5	15456	6.2701	0.6475	Red	5669
11680	O43847	NRDC_HUMAN	Nardilysin OS Homo sapiens GN NRD1 PE 1 SV 2	Regular	63.4	31.94	132598	10	7	74	3.22	134799	16369	26567	3.7413	0.4961	Red
4985	Q14194	DPYL1_HUMAN	Dihydropyrimidinase related protein 1 OS Homo sapiens GN CRMP1 PE 1 SV 1	Regular	63.3671	31.98	62526.1	14	7	41	3.85	38055	4738.5	13016	1.083	0.0677	Red
12641	Q9BWT3	PAPOG_HUMAN	Poly A polymerase gamma OS Homo sapiens GN PAPOLG PE 1 SV 2	Regular	63.2212	32.1	83144.9	24	12	59	4.89	50462	25021	23590	5.7187	0.4755	Red
9381	P32004	L1CAM_HUMAN	Neural cell adhesion molecule L1 OS Homo sapiens GN L1CAM PE 1 SV 2	Regular	63.0312	32.29	140972	17	11	93	3.1	87806	30476	22956	6.9655	0.9819	Red
10474	Q8TDZ2	MICA1_HUMAN	Protein methionine sulfoxide oxidase MICAL1 OS Homo sapiens GN MICAL1 PE 1 SV 2	Regular	63.0179	32.25	118958	16	7	79	4.69	37095	20318	9455	4.6438	0.5524	Red
7911	Q86XA9	HTR5A_HUMAN	HEAT repeat containing protein 5A OS Homo sapiens GN HEATR5A PE 1 SV 2	Regular	62.9458	32.29	225312	18	11	148	5.2	74763	45163	16634	10.3223	2.3257	Red	7912
1761	Q9NSI6	BRWD1_HUMAN	Bromodomain and WD repeat containing protein 1 OS Homo sapiens GN BRWD1 PE 1 SV 4	Regular	62.8745	32.26	265674	35	17	190	3.1	145473	31574	48674	7.2165	1.9172	Yellow	397 395 394 396 9431
15860	O15357	SHIP2_HUMAN	Phosphatidylinositol 3 4 5 trisphosphate 5 phosphatase 2 OS Homo sapiens GN INPPL1 PE 1 SV 2	Regular	62.7019	32.3	139397	22	10	103	3.74	73760	51111	26205	11.6818	1.6284	Red
16831	O15056	SYNJ2_HUMAN	Synaptojanin 2 OS Homo sapiens GN SYNJ2 PE 1 SV 3	Regular	62.5488	32.26	166679	20	11	94	4.81	52119	27015	16562	6.1745	1.0292	Red
9410	O15230	LAMA5_HUMAN	Laminin subunit alpha 5 OS Homo sapiens GN LAMA5 PE 1 SV 8	Regular	62.3522	32.23	412284	42	23	235	3.33	116836	28191	40114	6.4433	2.6564	Red	9408
893	Q10567	AP1B1_HUMAN	AP 1 complex subunit beta 1 OS Homo sapiens GN AP1B1 PE 1 SV 2	Regular	62.2684	32.27	105549	14	5	71	3.37	17462	11556	9482	2.6412	0.2788	Red
17278	O14746	TERT_HUMAN	Telomerase reverse transcriptase OS Homo sapiens GN TERT PE 1 SV 1	Regular	62.2444	32.23	128651	12	7	85	1.94	25997	18054	10513	4.1264	0.5309	Red
11692	Q7Z2Y5	NRK_HUMAN	Nik related protein kinase OS Homo sapiens GN NRK PE 2 SV 2	Regular	62.2114	32.27	179620	15	9	120	4.24	66066	39207	11968	8.961	1.6096	Red
7402	Q8IYK4	GT252_HUMAN	Procollagen galactosyltransferase 2 OS Homo sapiens GN GLT25D2 PE 1 SV 1	Regular	62.186	32.31	73266.6	11	7	47	6.23	18645	7377	12375	1.6861	0.1235	Red
5807	Q9ULE4	F184B_HUMAN	Protein FAM184B OS Homo sapiens GN FAM184B PE 2 SV 3	Regular	61.9299	32.35	121956	26	10	111	6.23	70276	15971	19626	3.6503	0.4452	Red
18142	Q9Y4A5	TRRAP_HUMAN	Transformation transcription domain associated protein OS Homo sapiens GN TRRAP PE 1 SV 3	Regular	61.6589	32.53	442049	38	25	318	2.77	132552	18606	30820	4.2525	1.8798	Red
10957	Q7Z406	MYH14_HUMAN	Myosin 14 OS Homo sapiens GN MYH14 PE 1 SV 2	Regular	61.639	32.5	228840	34	18	171	5.51	78902	20773	31758	4.7478	1.0865	Red
7720	P54198	HIRA_HUMAN	Protein HIRA OS Homo sapiens GN HIRA PE 1 SV 2	Regular	61.3107	32.61	113318	28	13	73	6.29	84080	31114	19088	7.1113	0.8058	Red
18695	P46939	UTRO_HUMAN	Utrophin OS Homo sapiens GN UTRN PE 1 SV 2	Regular	61.2883	32.57	396691	41	29	280	2.33	374809	239473	106491	54.7333	21.7122	Red	40108 4059 1873 10152 30551 30380 24656 39347
7415	O43824	GTPB6_HUMAN	Putative GTP binding protein 6 OS Homo sapiens GN GTPBP6 PE 2 SV 3	Regular	61.1968	32.54	57225.7	8	4	37	2.71	10856	6633	4829	1.516	0.0868	Red
17322	Q04206	TF65_HUMAN	Transcription factor p65 OS Homo sapiens GN RELA PE 1 SV 2	Regular	61.1762	32.5	60732.5	10	4	35	4.36	95481	10228.5	6261	2.3378	0.142	Red
11002	B2RTY4	MYO9A_HUMAN	Unconventional myosin IXa OS Homo sapiens GN MYO9A PE 1 SV 2	Regular	61.032	32.54	295101	37	21	235	4.24	89678	25324	41644	5.788	1.708	Red	10962 10966 10961 10956 10963 10964 10960 10959 10958 10965
10937	O75592	MYCB2_HUMAN	Probable E3 ubiquitin protein ligase MYCBP2 OS Homo sapiens GN MYCBP2 PE 1 SV 3	Regular	60.9653	32.58	518183	52	27	330	1.38	200675	54760	60390	12.5158	6.4855	Yellow
16765	O95425	SVIL_HUMAN	Supervillin OS Homo sapiens GN SVIL PE 1 SV 2	Regular	60.9306	32.54	249572	26	15	185	3.88	71661	17380	25455	3.9723	0.9914	Red
5233	O00418	EF2K_HUMAN	Eukaryotic elongation factor 2 kinase OS Homo sapiens GN EEF2K PE 1 SV 2	Regular	60.8788	32.51	82714.6	11	7	64	4.28	23125	4668	13597	1.0669	0.0882	Red
18164	P49815	TSC2_HUMAN	Tuberin OS Homo sapiens GN TSC2 PE 1 SV 2	Regular	60.3763	33.05	202718	26	13	125	2.27	82746	5985	21997	1.3679	0.2773	Red	16445
13935	P35236	PTN7_HUMAN	Tyrosine protein phosphatase non receptor type 7 OS Homo sapiens GN PTPN7 PE 1 SV 3	Regular	60.3501	33.01	40985.5	5	2	28	2.22	26244	3477	4163	0.7947	0.0326	Red
18944	Q8NEZ3	WDR19_HUMAN	WD repeat containing protein 19 OS Homo sapiens GN WDR19 PE 1 SV 2	Regular	60.2885	32.98	153520	16	9	111	4.32	23327	6082	13823	1.3901	0.2134	Red
690	Q8TCU4	ALMS1_HUMAN	Alstrom syndrome protein 1 OS Homo sapiens GN ALMS1 PE 1 SV 3	Regular	60.0418	32.94	463360	53	37	329	5.35	223250	30711	51611	7.0192	3.2524	Red
2820	Q02224	CENPE_HUMAN	Centromere associated protein E OS Homo sapiens GN CENPE PE 1 SV 2	Regular	59.6318	33.61	317784	50	31	342	3.15	332332	171560	39269	39.2113	12.4607	Red	22110
7647	O95714	HERC2_HUMAN	E3 ubiquitin protein ligase HERC2 OS Homo sapiens GN HERC2 PE 1 SV 2	Regular	59.6197	33.58	533844	53	28	337	2.38	220797	23028.3	37560	5.2633	2.8098	Red	7847
16676	Q8WXE9	STON2_HUMAN	Stonin 2 OS Homo sapiens GN STON2 PE 1 SV 1	Regular	59.5456	33.68	101907	6	3	48	4.09	61290	59791	6066	13.6657	1.3926	Red
10179	P27448	MARK3_HUMAN	MAP microtubule affinity regulating kinase 3 OS Homo sapiens GN MARK3 PE 1 SV 4	Regular	59.4936	33.72	85002	4	3	66	5.71	34068	12546	4600	2.8675	0.2437	Red
10148	P78559	MAP1A_HUMAN	Microtubule associated protein 1A OS Homo sapiens GN MAP1A PE 1 SV 6	Regular	59.4083	33.82	306968	46	19	232	6.96	132225	50697	34060	11.5872	3.5569	Red
9013	P46013	KI67_HUMAN	Antigen KI 67 OS Homo sapiens GN MKI67 PE 1 SV 2	Regular	59.2192	33.85	360918	60	29	333	3.35	213427	25532	60149	5.8355	2.1061	Red
5061	Q9NRD9	DUOX1_HUMAN	Dual oxidase 1 OS Homo sapiens GN DUOX1 PE 1 SV 1	Regular	58.9194	34.02	178832	27	14	136	1.03	93208	38877	22936	8.8856	1.589	Red	5062
12516	O00750	P3C2B_HUMAN	Phosphatidylinositol 4 phosphate 3 kinase C2 domain containing subunit beta OS Homo sapiens GN PIK3C	Regular	58.8108	34.06	186935	24	12	134	2.63	56656	8120	28160	1.8559	0.3469	Red
6508	Q14CM0	FRPD4_HUMAN	FERM and PDZ domain containing protein 4 OS Homo sapiens GN FRMPD4 PE 1 SV 1	Regular	58.0596	34.76	145577	13	10	106	5.6	29885	13121	13926	2.9989	0.4366	Red
10028	P80192	M3K9_HUMAN	Mitogen activated protein kinase kinase kinase 9 OS Homo sapiens GN MAP3K9 PE 1 SV 3	Regular	57.9826	34.92	122921	13	9	82	6.07	33228	16818	21727	3.8439	0.4725	Red
17388	Q9P2T0	THEG_HUMAN	Testicular haploid expressed gene protein OS Homo sapiens GN THEG PE 1 SV 1	Regular	57.9569	34.95	43785.7	11	4	37	2.9	30410	28920	8474	6.6099	0.2894	Red
14573	Q7Z6I6	RHG30_HUMAN	Rho GTPase activating protein 30 OS Homo sapiens GN ARHGAP30 PE 1 SV 3	Regular	57.8525	34.98	119723	13	7	82	4.45	40981	9539	13374	2.1802	0.261	Red
3480	Q15021	CND1_HUMAN	Condensin complex subunit 1 OS Homo sapiens GN NCAPD2 PE 1 SV 3	Regular	57.8177	34.95	158608	21	10	115	4.5	107642	12653	37778	2.8919	0.4587	Red
9176	Q05513	KPCZ_HUMAN	Protein kinase C zeta type OS Homo sapiens GN PRKCZ PE 1 SV 4	Regular	57.7802	34.91	68572.5	6	3	40	2.2	51897	141600	3090	32.3637	2.2193	Red
12621	Q504Q3	PAN2_HUMAN	PAB dependent poly A specific ribonuclease subunit 2 OS Homo sapiens GN PAN2 PE 1 SV 3	Regular	57.7725	34.88	136851	19	12	76	3.58	70856	7107	17775	1.6244	0.2223	Red
3880	Q9BSJ5	CQ080_HUMAN	Uncharacterized protein C17orf80 OS Homo sapiens GN C17orf80 PE 1 SV 2	Regular	57.7077	34.84	68398.8	7	5	52	2.46	75855	89152.5	8750	20.3764	1.3937	Red
2682	Q14004	CDK13_HUMAN	Cyclin dependent kinase 13 OS Homo sapiens GN CDK13 PE 1 SV 2	Regular	57.5043	34.81	165665	18	10	125	3.7	70169	35068	21034	8.015	1.3278	Red
6122	Q6V0I7	FAT4_HUMAN	Protocadherin Fat 4 OS Homo sapiens GN FAT4 PE 1 SV 2	Regular	57.4239	34.84	546622	51	26	299	3.71	126135	33444	47269	7.6439	4.1783	Red
19584	Q8NHY6	ZFP28_HUMAN	Zinc finger protein 28 homolog OS Homo sapiens GN ZFP28 PE 1 SV 1	Regular	57.4069	34.8	100872	18	7	75	2.88	135061	36299	26731	8.2964	0.8369	Red	19809
13299	Q15149	PLEC_HUMAN	Plectin OS Homo sapiens GN PLEC PE 1 SV 3	Regular	57.4061	34.77	533787	78	51	468	3.14	278603	46781.1	73778	10.6922	5.7073	Red	5497
9161	P50748	KNTC1_HUMAN	Kinetochore associated protein 1 OS Homo sapiens GN KNTC1 PE 1 SV 1	Regular	57.406	34.73	253372	31	20	173	2.13	89032	15897	30364	3.6334	0.9206	Red
2821	P49454	CENPF_HUMAN	Centromere protein F OS Homo sapiens GN CENPF PE 1 SV 2	Regular	57.3175	34.83	371073	60	33	346	4.11	213075	55518	52359	12.689	4.7086	Red
234	O60706	ABCC9_HUMAN	ATP binding cassette sub family C member 9 OS Homo sapiens GN ABCC9 PE 1 SV 2	Regular	57.1951	34.86	175650	13	7	98	3.49	43131	7457	6166	1.7044	0.2994	Red
473	O15204	ADEC1_HUMAN	ADAM DEC1 OS Homo sapiens GN ADAMDEC1 PE 1 SV 2	Regular	57.0064	35.02	53745	6	3	33	7.23	24716	5764.5	4644	1.3175	0.0708	Red
16063	O60264	SMCA5_HUMAN	SWI SNF related matrix associated actin dependent regulator of chromatin subfamily A member 5 OS Hom	Regular	57.0006	34.99	122590	17	10	94	2.19	43980	9280.5	12721	2.1211	0.26	Red	30793
8408	Q9Y283	INVS_HUMAN	Inversin OS Homo sapiens GN INVS PE 1 SV 2	Regular	56.9863	34.95	118910	10	5	71	3.85	31667	17999	14313	4.1138	0.4892	Green	7516 7599 16796
14942	O14802	RPC1_HUMAN	DNA directed RNA polymerase III subunit RPC1 OS Homo sapiens GN POLR3A PE 1 SV 2	Regular	56.973	34.92	157638	20	13	124	1.65	38929	6343.5	15111	1.4499	0.2286	Red
15972	P12755	SKI_HUMAN	Ski oncogene OS Homo sapiens GN SKI PE 1 SV 1	Regular	56.8448	35.01	81259.7	9	5	76	4.81	43139	9364	16636	2.1402	0.1739	Red
714	Q86WK7	AMGO3_HUMAN	Amphoterin induced protein 3 OS Homo sapiens GN AMIGO3 PE 2 SV 1	Regular	56.8222	34.98	56276.1	5	2	32	6.15	22245	24222	7789	5.5361	0.3116	Red
4910	Q9BZ29	DOCK9_HUMAN	Dedicator of cytokinesis protein 9 OS Homo sapiens GN DOCK9 PE 1 SV 2	Regular	56.4565	35.2	238670	32	20	167	4.49	169614	59899	45164	13.6903	3.2675	Red	4898 4899
15102	Q9NP92	RT30_HUMAN	28S ribosomal protein S30 mitochondrial OS Homo sapiens GN MRPS30 PE 1 SV 2	Regular	56.3569	35.29	50992.1	5	3	23	4.78	5573	7383	4484	1.6874	0.086	Red
11633	Q06495	NPT2A_HUMAN	Sodium dependent phosphate transport protein 2A OS Homo sapiens GN SLC34A1 PE 1 SV 1	Regular	56.2939	35.32	69678.8	7	3	31	5.16	18270	13168.5	4037	3.0098	0.2097	Red
4370	Q96F07	CYFP2_HUMAN	Cytoplasmic FMR1 interacting protein 2 OS Homo sapiens GN CYFIP2 PE 1 SV 2	Regular	56.2146	35.28	150395	19	8	99	1.33	42894	29194.5	9979	6.6726	1.0035	Red
1638	Q9Y6D5	BIG2_HUMAN	Brefeldin A inhibited guanine nucleotide exchange protein 2 OS Homo sapiens GN ARFGEF2 PE 1 SV 3	Regular	56.1958	35.37	204548	30	15	143	3.59	87018	10060	26484	2.2993	0.4703	Red	16350 1637
9734	P42704	LPPRC_HUMAN	Leucine rich PPR motif containing protein mitochondrial OS Homo sapiens GN LRPPRC PE 1 SV 3	Regular	55.8173	35.65	159103	21	11	130	7.1	36679	6204	18809	1.418	0.2256	Red
10963	P13533	MYH6_HUMAN	Myosin 6 OS Homo sapiens GN MYH6 PE 1 SV 5	Regular	55.6694	35.68	224534	31	16	159	2.84	156958	13163.6	37093	3.0086	0.6755	Red	10962 11002 10966 10961 10956 10964 10960 10959 10958 10965
5124	Q14204	DYHC1_HUMAN	Cytoplasmic dynein 1 heavy chain 1 OS Homo sapiens GN DYNC1H1 PE 1 SV 5	Regular	55.6385	35.65	535146	65	36	379	2.69	406565	24249	86847	5.5423	2.9659	Red
16175	Q9H3E2	SNX25_HUMAN	Sorting nexin 25 OS Homo sapiens GN SNX25 PE 1 SV 2	Regular	55.635	35.61	98686.8	12	8	88	2.98	32826	8388	9804	1.9171	0.1892	Red
17254	Q9BXF9	TEKT3_HUMAN	Tektin 3 OS Homo sapiens GN TEKT3 PE 1 SV 1	Regular	55.542	35.58	57149.3	10	4	38	6.33	104149	14154	17754	3.235	0.1849	Red
16771	Q53LP3	SWAHC_HUMAN	Ankyrin repeat domain containing protein SOWAHC OS Homo sapiens GN SOWAHC PE 1 SV 1	Regular	55.4149	35.67	55957.2	6	3	43	4.57	18512	7219.5	6777	1.6501	0.0923	Red
8467	Q9NWZ3	IRAK4_HUMAN	Interleukin 1 receptor associated kinase 4 OS Homo sapiens GN IRAK4 PE 1 SV 1	Regular	55.4009	35.76	51986.1	9	6	46	3.04	113698	296208	19850	67.7004	3.5195	Red
15888	O60292	SI1L3_HUMAN	Signal induced proliferation associated 1 like protein 3 OS Homo sapiens GN SIPA1L3 PE 1 SV 3	Regular	55.3725	35.84	195922	16	10	144	1.68	47775	19584	15468	4.4761	0.877	Red
1678	P12645	BMP3_HUMAN	Bone morphogenetic protein 3 OS Homo sapiens GN BMP3 PE 1 SV 2	Regular	55.357	35.81	54056.8	4	4	40	6.78	43741	33367	3157	7.6263	0.4123	Red
10956	Q9UKX3	MYH13_HUMAN	Myosin 13 OS Homo sapiens GN MYH13 PE 1 SV 2	Regular	55.2982	35.78	224746	24	16	160	3.97	114676	19255	20682	4.4009	0.9891	Red	10962 11002 10966 10961 10963 10964 10960 10959 10958 10965
15171	P21817	RYR1_HUMAN	Ryanodine receptor 1 OS Homo sapiens GN RYR1 PE 1 SV 3	Regular	55.2547	35.86	570879	56	28	357	2.14	128275	44929	54478	10.2688	5.8623	Red	15173 15172
15421	Q9NZJ4	SACS_HUMAN	Sacsin OS Homo sapiens GN SACS PE 1 SV 2	Regular	55.2477	35.83	526830	78	38	378	2.14	221584	35174	61555	8.0393	4.2353	Red
19714	A6NK53	ZN233_HUMAN	Zinc finger protein 233 OS Homo sapiens GN ZNF233 PE 2 SV 3	Regular	55.2172	35.8	78857.1	14	6	57	1.64	17748	7797	11370	1.7821	0.1405	Red
5163	O43491	E41L2_HUMAN	Band 4 1 like protein 2 OS Homo sapiens GN EPB41L2 PE 1 SV 1	Regular	55.0549	35.82	113101	14	9	108	5.37	29676	6870	12049	1.5702	0.1776	Red
18096	Q14669	TRIPC_HUMAN	Probable E3 ubiquitin protein ligase TRIP12 OS Homo sapiens GN TRIP12 PE 1 SV 1	Regular	54.8742	35.91	222373	26	11	154	3.66	50371	14943	23694	3.4153	0.7595	Red
10965	P12883	MYH7_HUMAN	Myosin 7 OS Homo sapiens GN MYH7 PE 1 SV 5	Regular	54.7931	35.94	223896	27	12	161	3.57	107163	11100.1	16264	2.537	0.568	Red	10962 11002 10966 10961 10956 10963 10964 10960 10959 10958
10994	Q8NEV4	MYO3A_HUMAN	Myosin IIIa OS Homo sapiens GN MYO3A PE 1 SV 2	Regular	54.7069	35.96	187691	21	16	133	2.66	76848	22495	27465	5.1414	0.965	Red	10993
8857	Q12791	KCMA1_HUMAN	Calcium activated potassium channel subunit alpha 1 OS Homo sapiens GN KCNMA1 PE 1 SV 2	Regular	54.6343	35.99	139556	11	5	87	5.26	24143	7412	7196	1.6941	0.2364	Red
4059	Q7Z407	CSMD3_HUMAN	CUB and sushi domain containing protein 3 OS Homo sapiens GN CSMD3 PE 2 SV 3	Regular	54.6112	35.96	414269	25	15	197	1.59	86015	9757	23115	2.23	0.9238	Red	40108 1873 10152 30551 30380 18695 24656 39347
18692	O75691	UTP20_HUMAN	Small subunit processome component 20 homolog OS Homo sapiens GN UTP20 PE 1 SV 3	Regular	54.5392	35.92	321009	31	17	208	2.15	141584	16537	23279	3.7796	1.2133	Red	24293
2767	Q9UPV0	CE164_HUMAN	Centrosomal protein of 164 kDa OS Homo sapiens GN CEP164 PE 1 SV 3	Regular	54.4324	35.95	164827	14	11	146	5.21	51273	12365	13051	2.8261	0.4658	Red
11206	O75376	NCOR1_HUMAN	Nuclear receptor corepressor 1 OS Homo sapiens GN NCOR1 PE 1 SV 2	Regular	54.2874	35.91	271123	33	21	206	4.34	126711	48518	60589	11.0891	3.0065	Red	11207
18606	O94874	UFL1_HUMAN	E3 UFM1 protein ligase 1 OS Homo sapiens GN UFL1 PE 1 SV 2	Regular	54.2869	35.88	90051.6	12	6	74	3.53	33585	35005.5	16917	8.0008	0.7205	Red
4888	Q6XZF7	DNMBP_HUMAN	Dynamin binding protein OS Homo sapiens GN DNMBP PE 1 SV 1	Regular	53.957	36.14	178830	13	9	127	3.55	42003	13920	10744	3.1815	0.569	Red
12676	Q9UKK3	PARP4_HUMAN	Poly ADP ribose polymerase 4 OS Homo sapiens GN PARP4 PE 1 SV 3	Regular	53.8749	36.29	194705	14	7	119	3.07	27605	9407	21133	2.15	0.4186	Yellow
12515	O00443	P3C2A_HUMAN	Phosphatidylinositol 4 phosphate 3 kinase C2 domain containing subunit alpha OS Homo sapiens GN PIK3	Regular	53.74	36.43	192277	26	12	150	3.02	65740	36874	19293	8.4278	1.6205	Red
1590	A6H8Y1	BDP1_HUMAN	Transcription factor TFIIIB component B homolog OS Homo sapiens GN BDP1 PE 1 SV 3	Regular	53.6997	36.46	295539	33	15	255	3.77	95709	21770	20074	4.9757	1.4705	Red
18824	Q709C8	VP13C_HUMAN	Vacuolar protein sorting associated protein 13C OS Homo sapiens GN VPS13C PE 1 SV 1	Regular	53.589	36.48	424729	42	25	295	1.68	207351	46223	47410	10.5646	4.4871	Red	6103 14564
9532	Q6ZMV7	LEKR1_HUMAN	Leucine glutamate and lysine rich protein 1 OS Homo sapiens GN LEKR1 PE 2 SV 2	Regular	53.5765	36.45	45329.4	2	4	49	3.35	8924	2517	4735	0.5753	0.0261	Red
14850	Q9BXT8	RNF17_HUMAN	RING finger protein 17 OS Homo sapiens GN RNF17 PE 1 SV 3	Regular	53.5386	36.53	187324	15	9	122	2.28	36723	7292	7362	1.6666	0.3122	Red
5810	Q8IYM0	F186B_HUMAN	Protein FAM186B OS Homo sapiens GN FAM186B PE 2 SV 2	Regular	53.5377	36.5	104121	10	7	98	4.48	23435	11944	9872	2.7299	0.2842	Red
1107	P04424	ARLY_HUMAN	Argininosuccinate lyase OS Homo sapiens GN ASL PE 1 SV 4	Regular	53.3896	36.52	51943.2	9	4	37	6.68	25392	24408	7915	5.5786	0.2898	Red
12812	O95613	PCNT_HUMAN	Pericentrin OS Homo sapiens GN PCNT PE 1 SV 4	Regular	53.3787	36.49	380832	42	22	342	2.01	114699	17499	32106	3.9995	1.5231	Red	618
6262	Q6ZNL6	FGD5_HUMAN	FYVE RhoGEF and PH domain containing protein 5 OS Homo sapiens GN FGD5 PE 1 SV 3	Regular	53.3163	36.57	161830	20	11	103	3.15	59045	8306	14962	1.8984	0.3072	Red
15723	P58004	SESN2_HUMAN	Sestrin 2 OS Homo sapiens GN SESN2 PE 1 SV 1	Regular	53.0123	36.71	54893	9	5	35	5.21	18429	20829	5155	4.7606	0.2613	Red	26265 25346 16796
9408	Q16787	LAMA3_HUMAN	Laminin subunit alpha 3 OS Homo sapiens GN LAMA3 PE 1 SV 2	Regular	52.9798	36.85	375888	51	21	257	4.11	134049	28063.4	57964	6.4141	2.411	Red	9410
14895	Q13464	ROCK1_HUMAN	Rho associated protein kinase 1 OS Homo sapiens GN ROCK1 PE 1 SV 1	Regular	52.97	36.81	159201	15	11	144	5.17	24856	7841	14957	1.7921	0.2853	Red
16443	Q96JI7	SPTCS_HUMAN	Spatacsin OS Homo sapiens GN SPG11 PE 1 SV 3	Regular	52.9677	36.78	282860	35	18	182	2.17	126957	29632	27532	6.7726	1.9157	Red
8460	Q13576	IQGA2_HUMAN	Ras GTPase activating like protein IQGAP2 OS Homo sapiens GN IQGAP2 PE 1 SV 4	Regular	52.76	36.86	181148	16	11	126	2.35	39636	8620	16948	1.9702	0.3569	Red
1245	Q76L83	ASXL2_HUMAN	Putative Polycomb group protein ASXL2 OS Homo sapiens GN ASXL2 PE 1 SV 1	Regular	52.6333	37.05	155132	34	18	114	1.25	63156	10332	35504	2.3615	0.3663	Red
3592	P12110	CO6A2_HUMAN	Collagen alpha 2 VI chain OS Homo sapiens GN COL6A2 PE 1 SV 4	Regular	52.6092	37.02	109777	6	5	70	1.57	14007	18546	5731	4.2388	0.4653	Red
18553	Q8TF42	UBS3B_HUMAN	Ubiquitin associated and SH3 domain containing protein B OS Homo sapiens GN UBASH3B PE 1 SV 2	Regular	52.5597	36.99	73836.6	9	5	49	3.85	27605	22416	7126	5.1233	0.3783	Red
13219	Q9ULL1	PKHG1_HUMAN	Pleckstrin homology domain containing family G member 1 OS Homo sapiens GN PLEKHG1 PE 1 SV 2	Regular	52.5304	36.95	156637	18	13	104	4.62	68655	16305	12960	3.7266	0.5837	Red
19768	Q06730	ZN33A_HUMAN	Zinc finger protein 33A OS Homo sapiens GN ZNF33A PE 1 SV 3	Regular	52.4032	37.09	97235.5	12	5	61	1.85	21737	22704	10170	5.1892	0.5046	Red
8729	Q6A163	K1C39_HUMAN	Keratin type I cytoskeletal 39 OS Homo sapiens GN KRT39 PE 1 SV 2	Regular	52.3727	37.11	57190.9	9	4	47	6.11	29468	8648	6338	1.9766	0.113	Red
17676	Q7Z5M5	TMC3_HUMAN	Transmembrane channel like protein 3 OS Homo sapiens GN TMC3 PE 1 SV 3	Regular	52.303	37.08	126541	14	9	78	4.55	151383	33452	27532	7.6457	0.9675	Red
5706	Q96EK7	F120B_HUMAN	Constitutive coactivator of peroxisome proliferator activated receptor gamma OS Homo sapiens GN FAM1	Regular	52.2848	37.05	105837	15	6	74	1.32	34223	30297	24348	6.9246	0.7329	Red
13646	Q9Y520	PRC2C_HUMAN	Protein PRRC2C OS Homo sapiens GN PRRC2C PE 1 SV 4	Regular	52.1386	37.18	317539	29	17	281	3.59	92033	19241	21711	4.3977	1.3964	Red	13644
1734	P51587	BRCA2_HUMAN	Breast cancer type 2 susceptibility protein OS Homo sapiens GN BRCA2 PE 1 SV 2	Regular	51.9764	37.26	388560	52	27	290	2.14	274575	20856	51744	4.7668	1.8522	Red
10753	Q96J65	MRP9_HUMAN	Multidrug resistance associated protein 9 OS Homo sapiens GN ABCC12 PE 1 SV 2	Regular	51.9522	37.23	153723	14	7	99	4.86	92819	52228	25194	11.9371	1.835	Red
14820	Q63HN8	RN213_HUMAN	E3 ubiquitin protein ligase RNF213 OS Homo sapiens GN RNF213 PE 1 SV 3	Regular	51.9421	37.25	598936	54	30	438	2.27	186862	15281	48460	3.4926	2.0918	Red	7106
17265	Q63HR2	TENC1_HUMAN	Tensin like C1 domain containing phosphatase OS Homo sapiens GN TENC1 PE 1 SV 2	Regular	51.9342	37.22	154462	16	8	108	5.54	30904	5744	17039	1.3128	0.2028	Red
3007	O14646	CHD1_HUMAN	Chromodomain helicase DNA binding protein 1 OS Homo sapiens GN CHD1 PE 1 SV 2	Regular	51.9304	37.18	197828	28	13	144	2.69	105894	40609.4	30085	9.2816	1.8362	Red	3008
17269	Q68CZ2	TENS3_HUMAN	Tensin 3 OS Homo sapiens GN TNS3 PE 1 SV 2	Regular	51.9029	37.15	156463	15	10	96	5.95	51338	12024	13604	2.7482	0.43	Red
11589	O60287	NPA1P_HUMAN	Nucleolar pre ribosomal associated protein 1 OS Homo sapiens GN URB1 PE 1 SV 4	Regular	51.8077	37.12	256671	31	19	175	3.26	90682	12185	31684	2.785	0.7148	Red
6361	O75369	FLNB_HUMAN	Filamin B OS Homo sapiens GN FLNB PE 1 SV 2	Regular	51.7184	37.09	280331	33	16	186	2.69	141763	23948	26640	5.4735	1.5344	Red	6360
18853	Q9H270	VPS11_HUMAN	Vacuolar protein sorting associated protein 11 homolog OS Homo sapiens GN VPS11 PE 1 SV 1	Regular	51.5885	37.05	109148	10	7	83	4.99	35635	13903	4337	3.1776	0.3468	Red
12723	P05165	PCCA_HUMAN	Propionyl CoA carboxylase alpha chain mitochondrial OS Homo sapiens GN PCCA PE 1 SV 4	Regular	51.4375	37.13	80686.4	12	7	58	3.57	82292	94932	16928	21.6974	1.7507	Red
1319	Q96BY7	ATG2B_HUMAN	Autophagy related protein 2 homolog B OS Homo sapiens GN ATG2B PE 1 SV 5	Regular	51.2994	37.26	234645	19	15	148	3.56	56816	25647	18244	5.8618	1.3754	Red
10022	Q99759	M3K3_HUMAN	Mitogen activated protein kinase kinase kinase 3 OS Homo sapiens GN MAP3K3 PE 1 SV 2	Regular	51.2089	37.28	71297	8	6	58	3.83	15361	9582	11496	2.19	0.1561	Red
18895	Q5TIE3	VW5B1_HUMAN	von Willebrand factor A domain containing protein 5B1 OS Homo sapiens GN VWA5B1 PE 1 SV 2	Regular	51.2003	37.31	135114	13	8	77	5.25	26301	12878	11840	2.9434	0.3977	Red
7164	Q16538	GP162_HUMAN	Probable G protein coupled receptor 162 OS Homo sapiens GN GPR162 PE 2 SV 1	Regular	51.1966	37.27	64671.8	11	3	39	6.8	6202	6202	5037	1.4175	0.0917	Red
11093	Q9C000	NALP1_HUMAN	NACHT LRR and PYD domains containing protein 1 OS Homo sapiens GN NLRP1 PE 1 SV 1	Regular	51.1648	37.3	167919	16	9	120	2.72	30050	11974	9620	2.7367	0.4596	Red
18405	O75643	U520_HUMAN	U5 small nuclear ribonucleoprotein 200 kDa helicase OS Homo sapiens GN SNRNP200 PE 1 SV 2	Regular	51.1224	37.26	246162	33	15	177	5.52	103407	27711	26699	6.3335	1.5591	Red
10991	O00160	MYO1F_HUMAN	Unconventional myosin If OS Homo sapiens GN MYO1F PE 1 SV 3	Regular	51.0483	37.34	125586	20	11	82	3.46	54457	10305	24443	2.3553	0.2958	Red
6362	Q14315	FLNC_HUMAN	Filamin C OS Homo sapiens GN FLNC PE 1 SV 3	Regular	50.8821	37.47	293589	49	22	193	3.01	110961	15682.2	38954	3.5843	1.0523	Red	6360
12644	O43252	PAPS1_HUMAN	Bifunctional 3 phosphoadenosine 5 phosphosulfate synthase 1 OS Homo sapiens GN PAPSS1 PE 1 SV 2	Regular	50.7471	37.49	71631.7	15	6	57	2.08	21566	3759	20285	0.8591	0.0615	Red
18825	Q5THJ4	VP13D_HUMAN	Vacuolar protein sorting associated protein 13D OS Homo sapiens GN VPS13D PE 1 SV 1	Regular	50.6791	37.46	495609	55	30	334	2.26	315165	123507	97906	28.2284	13.9903	Red
18259	Q6P3X3	TTC27_HUMAN	Tetratricopeptide repeat protein 27 OS Homo sapiens GN TTC27 PE 1 SV 1	Regular	50.5945	37.48	97944.2	6	5	59	7.12	41908	35931	32346	8.2123	0.8043	Red
9905	Q86V48	LUZP1_HUMAN	Leucine zipper protein 1 OS Homo sapiens GN LUZP1 PE 1 SV 2	Regular	50.384	37.55	120845	20	10	100	4.09	105771	10712	17391	2.4483	0.2959	Red
17284	Q8NFU7	TET1_HUMAN	Methylcytosine dioxygenase TET1 OS Homo sapiens GN TET1 PE 1 SV 2	Regular	50.2691	37.73	238103	9	6	144	2.01	31604	9805	10651	2.241	0.5336	Red
968	P04114	APOB_HUMAN	Apolipoprotein B 100 OS Homo sapiens GN APOB PE 1 SV 2	Regular	50.1942	37.75	516974	67	38	351	2.63	196574	43069	51073	9.8437	5.089	Red	39234 5125 26594 18092 31963 1302 13591 31173 38504 16651 17431
3624	Q05707	COEA1_HUMAN	Collagen alpha 1 XIV chain OS Homo sapiens GN COL14A1 PE 1 SV 3	Regular	50.1666	37.72	194599	26	13	106	2.78	54592	12598	29010	2.8794	0.5603	Red
18514	Q8NFA0	UBP32_HUMAN	Ubiquitin carboxyl terminal hydrolase 32 OS Homo sapiens GN USP32 PE 1 SV 1	Regular	50.1289	37.69	183937	9	7	121	3.18	19339	6104.6	8149	1.3952	0.2566	Red	18538
14831	Q05823	RN5A_HUMAN	2 5A dependent ribonuclease OS Homo sapiens GN RNASEL PE 1 SV 2	Regular	50.1202	37.66	84331.3	7	4	71	3.37	10253	7427	2583	1.6975	0.1432	Red
14210	Q8NHQ8	RASF8_HUMAN	Ras association domain containing protein 8 OS Homo sapiens GN RASSF8 PE 1 SV 2	Regular	50.061	37.63	48555.1	7	4	38	6.68	16936	11367	4522	2.598	0.1261	Red
8816	Q86V97	KBTB6_HUMAN	Kelch repeat and BTB domain containing protein 6 OS Homo sapiens GN KBTBD6 PE 1 SV 1	Regular	49.9365	37.65	77449.6	6	3	54	5.93	19373	5773.5	6653	1.3196	0.1022	Red
19702	O75362	ZN217_HUMAN	Zinc finger protein 217 OS Homo sapiens GN ZNF217 PE 1 SV 1	Regular	49.8743	37.62	117154	15	7	88	0.95	59552	58650	18059	13.4049	1.5704	Red
149	Q8IZ83	A16A1_HUMAN	Aldehyde dehydrogenase family 16 member A1 OS Homo sapiens GN ALDH16A1 PE 1 SV 2	Regular	49.8634	37.58	86154.1	6	4	45	2	9835	3096	2607	0.7076	0.061	Red
16447	Q9NRC6	SPTN5_HUMAN	Spectrin beta chain non erythrocytic 5 OS Homo sapiens GN SPTBN5 PE 1 SV 1	Regular	49.8627	37.55	419516	42	20	327	2.75	99799	16319	36970	3.7298	1.5647	Red
4777	O75165	DJC13_HUMAN	DnaJ homolog subfamily C member 13 OS Homo sapiens GN DNAJC13 PE 1 SV 5	Regular	49.8469	37.52	256696	33	16	179	2.32	89079	24382	24314	5.5727	1.4305	Red
1733	P38398	BRCA1_HUMAN	Breast cancer type 1 susceptibility protein OS Homo sapiens GN BRCA1 PE 1 SV 2	Regular	49.7742	37.65	210230	22	11	145	1.4	100295	39061.5	16728	8.9278	1.8769	Yellow
5116	Q9P2D7	DYH1_HUMAN	Dynein heavy chain 1 axonemal OS Homo sapiens GN DNAH1 PE 1 SV 4	Regular	49.7689	37.61	498003	57	31	323	3.42	177996	41267	59857	9.4319	4.6971	Red	5118
13603	Q9BYK8	PR285_HUMAN	Peroxisomal proliferator activated receptor A interacting complex 285 kDa protein OS Homo sapiens GN	Regular	49.6736	37.64	298472	38	20	197	2.57	228896	20992	58547	4.7979	1.432	Red	27529
9030	Q86VH2	KIF27_HUMAN	Kinesin like protein KIF27 OS Homo sapiens GN KIF27 PE 2 SV 1	Regular	48.9089	38.07	161424	27	13	142	1.5	85558	23746.5	23257	5.4274	0.8761	Red	8993
2402	Q5T9S5	CCD18_HUMAN	Coiled coil domain containing protein 18 OS Homo sapiens GN CCDC18 PE 1 SV 1	Regular	48.7588	38.09	170103	26	14	152	2.89	172308	102752	19648	23.4847	3.9948	Red	8459 36109 25694
13928	Q9Y2R2	PTN22_HUMAN	Tyrosine protein phosphatase non receptor type 22 OS Homo sapiens GN PTPN22 PE 1 SV 2	Regular	48.6437	38.31	92503.3	13	7	59	2.85	37990	5971.5	7946	1.3648	0.1263	Red
17037	Q9C0D5	TANC1_HUMAN	Protein TANC1 OS Homo sapiens GN TANC1 PE 1 SV 3	Regular	48.6268	38.28	204387	38	19	129	5.37	323824	13600	35381	3.1084	0.6353	Red
2193	Q68DN1	CB016_HUMAN	Uncharacterized protein C2orf16 OS Homo sapiens GN C2orf16 PE 1 SV 3	Regular	48.5186	38.35	225918	16	12	153	3.33	55825	10431	11294	2.3841	0.5386	Red
788	Q12955	ANK3_HUMAN	Ankyrin 3 OS Homo sapiens GN ANK3 PE 1 SV 3	Regular	48.4768	38.42	482692	62	38	361	2.17	247351	25361	64222	5.7964	2.7979	Yellow	787
13677	Q8TCU6	PREX1_HUMAN	Phosphatidylinositol 3 4 5 trisphosphate dependent Rac exchanger 1 protein OS Homo sapiens GN PREX1	Regular	48.2261	38.59	188884	34	15	130	3.86	126743	46256	42957	10.5721	1.9969	Red	23808 13230
3594	A8TX70	CO6A5_HUMAN	Collagen alpha 5 VI chain OS Homo sapiens GN COL6A5 PE 1 SV 1	Regular	48.2142	38.56	291979	31	17	217	4.86	76433	34512	26250	7.888	2.3031	Red
14260	P98175	RBM10_HUMAN	RNA binding protein 10 OS Homo sapiens GN RBM10 PE 1 SV 3	Regular	48.1374	38.52	103875	15	6	73	2.04	44052	20365.5	11799	4.6547	0.4835	Red
1377	Q13535	ATR_HUMAN	Serine threonine protein kinase ATR OS Homo sapiens GN ATR PE 1 SV 3	Regular	48.1371	38.49	304960	31	17	206	2.38	281278	156523	91171	35.7744	10.9098	Red
8991	Q96Q89	KI20B_HUMAN	Kinesin like protein KIF20B OS Homo sapiens GN KIF20B PE 1 SV 3	Regular	48.0945	38.51	211998	27	18	197	3.85	77063	7208	21607	1.6474	0.3493	Red
19092	Q702N8	XIRP1_HUMAN	Xin actin binding repeat containing protein 1 OS Homo sapiens GN XIRP1 PE 1 SV 1	Regular	48.0768	38.48	199759	16	10	153	3.8	141307	110764	20216	25.3159	5.0571	Red
9167	Q15139	KPCD1_HUMAN	Serine threonine protein kinase D1 OS Homo sapiens GN PRKD1 PE 1 SV 2	Regular	48.0653	38.45	103016	8	6	51	2.96	58364	23245.5	7349	5.3129	0.5473	Red	2706
12533	Q92569	P55G_HUMAN	Phosphatidylinositol 3 kinase regulatory subunit gamma OS Homo sapiens GN PIK3R3 PE 1 SV 2	Regular	48.0525	38.42	54733.6	6	4	50	2.39	38033	18255	8904	4.1723	0.2284	Red	12545
19829	Q96JM2	ZN462_HUMAN	Zinc finger protein 462 OS Homo sapiens GN ZNF462 PE 1 SV 3	Regular	47.9641	38.44	289650	32	17	189	3.95	85013	19650	24018	4.4911	1.3009	Red
15114	Q9NZ71	RTEL1_HUMAN	Regulator of telomere elongation helicase 1 OS Homo sapiens GN RTEL1 PE 1 SV 2	Regular	47.865	38.6	135052	13	9	89	4.84	32707	21392	16354	4.8893	0.6603	Red
15608	Q9NVU7	SDA1_HUMAN	Protein SDA1 homolog OS Homo sapiens GN SDAD1 PE 1 SV 3	Regular	47.6356	38.82	80327.7	10	6	61	1.16	19780	2766	5337	0.6322	0.0508	Red
3014	Q9HCK8	CHD8_HUMAN	Chromodomain helicase DNA binding protein 8 OS Homo sapiens GN CHD8 PE 1 SV 5	Regular	47.6202	38.79	292344	31	18	168	3.22	68513	19383	24173	4.4301	1.2951	Red	3013
9820	A6PVS8	LRIQ3_HUMAN	Leucine rich repeat and IQ domain containing protein 3 OS Homo sapiens GN LRRIQ3 PE 2 SV 1	Regular	47.5902	38.76	74302.4	14	6	49	1.44	44219	12615	9757	2.8832	0.2142	Red
6070	Q96K12	FACR2_HUMAN	Fatty acyl CoA reductase 2 OS Homo sapiens GN FAR2 PE 2 SV 1	Regular	47.5699	38.73	59894.8	6	3	38	5.05	20362	27298.5	5764	6.2393	0.3737	Red
13855	O75475	PSIP1_HUMAN	PC4 and SFRS1 interacting protein OS Homo sapiens GN PSIP1 PE 1 SV 1	Regular	47.5526	38.69	60217.4	7	5	55	4.34	22773	6029.93	4989	1.3782	0.083	Red	7596 7599
16436	P02549	SPTA1_HUMAN	Spectrin alpha chain erythrocytic 1 OS Homo sapiens GN SPTA1 PE 1 SV 5	Regular	47.4759	38.71	281212	38	20	234	3.47	168459	15591	26359	3.5634	1.0021	Red
8391	P14616	INSRR_HUMAN	Insulin receptor related protein OS Homo sapiens GN INSRR PE 1 SV 2	Regular	47.384	38.83	146344	24	11	89	6.01	105764	33969	39930	7.7639	1.1362	Red
13279	Q9P212	PLCE1_HUMAN	1 phosphatidylinositol 4 5 bisphosphate phosphodiesterase epsilon 1 OS Homo sapiens GN PLCE1 PE 1 SV	Regular	47.313	38.94	261909	29	13	164	3.52	130849	107019	23505	24.46	6.4063	Red
13311	Q96Q06	PLIN4_HUMAN	Perilipin 4 OS Homo sapiens GN PLIN4 PE 2 SV 2	Regular	47.212	39.1	135287	28	14	137	3.98	79252	19464	33010	4.4486	0.6018	Red
11073	Q6IA69	NADE_HUMAN	Glutamine dependent NAD synthetase OS Homo sapiens GN NADSYN1 PE 1 SV 3	Regular	47.1981	39.07	80596.5	11	5	39	5.81	53213	25423	4303	5.8106	0.4683	Red
4089	Q12996	CSTF3_HUMAN	Cleavage stimulation factor subunit 3 OS Homo sapiens GN CSTF3 PE 1 SV 1	Regular	47.1512	39.04	83377.9	7	5	60	3.91	17732	19153.5	4345	4.3777	0.365	Red
15278	Q6ZT89	S2548_HUMAN	Solute carrier family 25 member 48 OS Homo sapiens GN SLC25A48 PE 2 SV 2	Regular	47.1473	39.01	33839	6	4	21	9	19461	13510	8693	3.0878	0.1045	Red
14539	O94844	RHBT1_HUMAN	Rho related BTB domain containing protein 1 OS Homo sapiens GN RHOBTB1 PE 1 SV 2	Regular	46.9002	39.17	80557.9	9	6	66	6.9	20742	8550.74	6260	1.9543	0.1574	Red	14540
2766	O94986	CE152_HUMAN	Centrosomal protein of 152 kDa OS Homo sapiens GN CEP152 PE 1 SV 3	Regular	46.8502	39.14	191124	19	10	158	1.09	66818	5850	14676	1.3371	0.2555	Red	1837
16153	Q9NSN8	SNTG1_HUMAN	Gamma 1 syntrophin OS Homo sapiens GN SNTG1 PE 1 SV 1	Regular	46.8259	39.2	59166.9	11	5	32	4.84	21477	12756	8166	2.9155	0.1725	Red
6476	A0AVI2	FR1L5_HUMAN	Fer 1 like protein 5 OS Homo sapiens GN FER1L5 PE 2 SV 2	Regular	46.6	39.41	244130	28	13	175	3.97	54986	27738	21722	6.3397	1.5477	Red
14427	Q8N1G1	REXO1_HUMAN	RNA exonuclease 1 homolog OS Homo sapiens GN REXO1 PE 1 SV 3	Regular	46.5218	39.43	132821	18	10	108	1.06	48766	8481	15707	1.9384	0.2575	Red
18473	Q14139	UBE4A_HUMAN	Ubiquitin conjugation factor E4 A OS Homo sapiens GN UBE4A PE 1 SV 2	Regular	46.2218	39.44	123644	10	9	78	2.81	59667	50099	11598	11.4505	1.4158	Red
7573	Q9Y5Z7	HCFC2_HUMAN	Host cell factor 2 OS Homo sapiens GN HCFC2 PE 1 SV 1	Regular	46.2206	39.41	87748.6	9	8	62	7.07	30237	7818	5027	1.7869	0.1568	Red
15546	O95171	SCEL_HUMAN	Sciellin OS Homo sapiens GN SCEL PE 1 SV 2	Regular	45.9904	39.48	78065.1	5	4	65	1.6	13853	15933	4296	3.6416	0.2843	Red
17316	Q12789	TF3C1_HUMAN	General transcription factor 3C polypeptide 1 OS Homo sapiens GN GTF3C1 PE 1 SV 4	Regular	45.8861	39.58	241213	30	12	171	2.61	92747	44777	23893	10.2341	2.4686	Red
14135	Q15276	RABE1_HUMAN	Rab GTPase binding effector protein 1 OS Homo sapiens GN RABEP1 PE 1 SV 2	Regular	45.7679	39.69	99689.8	14	8	103	5.34	81224	35939	17397	8.2141	0.8189	Red
18547	Q8IWV8	UBR2_HUMAN	E3 ubiquitin protein ligase UBR2 OS Homo sapiens GN UBR2 PE 1 SV 1	Regular	45.722	39.71	203960	9	6	135	2.51	26355	11765	8185	2.689	0.5484	Red
4908	Q96N67	DOCK7_HUMAN	Dedicator of cytokinesis protein 7 OS Homo sapiens GN DOCK7 PE 1 SV 4	Regular	45.6229	39.82	244443	30	17	159	2.2	121815	32391.4	31078	7.4033	1.8097	Red	4907
1272	Q01814	AT2B2_HUMAN	Plasma membrane calcium transporting ATPase 2 OS Homo sapiens GN ATP2B2 PE 1 SV 2	Regular	45.4781	39.88	138074	21	10	89	1.05	69323	22527	15141	5.1487	0.7109	Red	1273
15172	Q92736	RYR2_HUMAN	Ryanodine receptor 2 OS Homo sapiens GN RYR2 PE 1 SV 3	Regular	45.4332	39.94	569701	46	21	397	1.55	80489	29838	41596	6.8197	3.8852	Red	15173 15171
11006	Q9NZM1	MYOF_HUMAN	Myoferlin OS Homo sapiens GN MYOF PE 1 SV 1	Regular	45.4088	39.91	236249	18	11	164	0.68	70986	8970	22460	2.0502	0.4843	Red
18068	O15016	TRI66_HUMAN	Tripartite motif containing protein 66 OS Homo sapiens GN TRIM66 PE 2 SV 4	Regular	45.3647	39.88	137230	7	4	77	0.99	11175	18642	3078	4.2608	0.5847	Red
19043	Q9H4A3	WNK1_HUMAN	Serine threonine protein kinase WNK1 OS Homo sapiens GN WNK1 PE 1 SV 2	Regular	45.3076	39.94	251707	30	16	104	1.72	66629	23191	25247	5.3005	1.3342	Red	19044
9718	O95490	LPHN2_HUMAN	Latrophilin 2 OS Homo sapiens GN LPHN2 PE 1 SV 2	Regular	45.2183	39.95	165573	13	7	91	4.39	36337	20965	11321	4.7917	0.7934	Red
5114	Q0VDD8	DYH14_HUMAN	Dynein heavy chain 14 axonemal OS Homo sapiens GN DNAH14 PE 2 SV 3	Regular	45.2047	39.92	404172	34	21	268	3.54	120302	25931	31158	5.9267	2.3954	Red	5118 618 25133 5115 37410
8850	Q17RG1	KCD19_HUMAN	BTB POZ domain containing protein KCTD19 OS Homo sapiens GN KCTD19 PE 2 SV 1	Regular	45.0626	40.03	106135	9	6	76	3.46	60015	10641	8257	2.4321	0.2581	Red
15882	Q6ZSJ9	SHSA6_HUMAN	Protein shisa 6 homolog OS Homo sapiens GN SHISA6 PE 2 SV 2	Regular	44.9662	40.05	56391.4	6	3	42	7	24575	20739	5502	4.74	0.2673	Red
16261	Q9Y5B9	SP16H_HUMAN	FACT complex subunit SPT16 OS Homo sapiens GN SUPT16H PE 1 SV 1	Regular	44.9522	40.02	120484	12	6	101	1.05	146942	3702	5509	0.8461	0.1019	Red
10996	Q9Y4I1	MYO5A_HUMAN	Unconventional myosin Va OS Homo sapiens GN MYO5A PE 1 SV 2	Regular	44.8961	40.12	217116	29	20	161	4.26	91156	32294	19846	7.381	1.6025	Red	18823 10984 10997 10998 2128 10960 10959 15042
15173	Q15413	RYR3_HUMAN	Ryanodine receptor 3 OS Homo sapiens GN RYR3 PE 1 SV 3	Regular	44.8406	40.18	558145	38	24	363	2.98	114588	31625	40311	7.2281	4.0343	Red	11207 16445 15172 15171
13932	P29074	PTN4_HUMAN	Tyrosine protein phosphatase non receptor type 4 OS Homo sapiens GN PTPN4 PE 1 SV 1	Regular	44.8056	40.19	106995	13	6	67	2.38	18580	5835	7713	1.3336	0.1427	Red
15844	Q9Y566	SHAN1_HUMAN	SH3 and multiple ankyrin repeat domains protein 1 OS Homo sapiens GN SHANK1 PE 1 SV 2	Regular	44.8047	40.16	225758	21	11	116	3.52	33536	8791	11052	2.0092	0.4536	Red	23249
15297	Q9Y2P5	S27A5_HUMAN	Bile acyl CoA synthetase OS Homo sapiens GN SLC27A5 PE 1 SV 1	Regular	44.7824	40.13	76468.7	4	3	41	2.61	13182	16392	2558	3.7465	0.2865	Red
11207	Q9Y618	NCOR2_HUMAN	Nuclear receptor corepressor 2 OS Homo sapiens GN NCOR2 PE 1 SV 2	Regular	44.7126	40.1	275546	28	13	226	1.9	97484	10010	25266	2.2879	0.6304	Red	15173 16445 11206
4914	Q7L591	DOK3_HUMAN	Docking protein 3 OS Homo sapiens GN DOK3 PE 1 SV 2	Regular	44.6455	40.12	54029.7	5	4	38	7.26	22817	7677	4906	1.7546	0.0948	Red
5117	Q9P225	DYH2_HUMAN	Dynein heavy chain 2 axonemal OS Homo sapiens GN DNAH2 PE 1 SV 3	Regular	44.5855	40.13	511121	52	30	364	4.09	404371	16165.2	69927	3.6947	1.8884	Red	5123 5115
14609	Q6R327	RICTR_HUMAN	Rapamycin insensitive companion of mTOR OS Homo sapiens GN RICTOR PE 1 SV 1	Regular	44.5505	40.1	194328	16	7	133	1.99	34014	26812	14030	6.1281	1.1909	Red
14254	Q9Y3P9	RBGP1_HUMAN	Rab GTPase activating protein 1 OS Homo sapiens GN RABGAP1 PE 1 SV 3	Regular	44.4966	40.12	122992	12	8	90	2.9	30335	9078	9592	2.0748	0.2552	Red
10995	Q8WXR4	MYO3B_HUMAN	Myosin IIIb OS Homo sapiens GN MYO3B PE 2 SV 4	Regular	44.308	40.09	153255	10	8	93	2.68	33147	13972	6911	3.1934	0.4894	Red
1232	Q8IZT6	ASPM_HUMAN	Abnormal spindle like microcephaly associated protein OS Homo sapiens GN ASPM PE 1 SV 2	Regular	44.1968	40.1	413451	58	30	265	3.62	261570	42332	52284	9.6753	4.0002	Red
10476	Q7RTP6	MICA3_HUMAN	Protein methionine sulfoxide oxidase MICAL3 OS Homo sapiens GN MICAL3 PE 1 SV 2	Regular	44.1458	40.16	225436	24	17	173	3.2	62529	7453	26969	1.7034	0.384	Red
16404	Q7Z699	SPRE1_HUMAN	Sprouty related EVH1 domain containing protein 1 OS Homo sapiens GN SPRED1 PE 1 SV 2	Regular	44.0664	40.22	51788.5	4	2	34	6.53	17523	26284.5	4168	6.0075	0.3111	Red
12859	P27815	PDE4A_HUMAN	cAMP specific 3 5 cyclic phosphodiesterase 4A OS Homo sapiens GN PDE4A PE 1 SV 3	Regular	43.8783	40.41	98770.6	7	3	58	3.27	21996	6402	10342	1.4632	0.1445	Red
3692	Q8IZC6	CORA1_HUMAN	Collagen alpha 1 XXVII chain OS Homo sapiens GN COL27A1 PE 1 SV 1	Regular	43.4993	40.6	187748	34	15	114	4.73	72416	39367	22036	8.9976	1.6893	Red
4592	O00571	DDX3X_HUMAN	ATP dependent RNA helicase DDX3X OS Homo sapiens GN DDX3X PE 1 SV 3	Regular	43.257	40.7	73642.7	15	9	65	5.14	38557	5202	14601	1.189	0.0876	Red
16629	P40763	STAT3_HUMAN	Signal transducer and activator of transcription 3 OS Homo sapiens GN STAT3 PE 1 SV 2	Regular	43.2278	40.71	88866.4	16	7	58	4.94	42972	8675	13495	1.9827	0.1762	Red
8964	Q9BY66	KDM5D_HUMAN	Lysine specific demethylase 5D OS Homo sapiens GN KDM5D PE 1 SV 2	Regular	43.1988	40.68	176868	19	12	128	3.25	58922	12293	21416	2.8097	0.4969	Red
15625	Q58EX2	SDK2_HUMAN	Protein sidekick 2 OS Homo sapiens GN SDK2 PE 1 SV 3	Regular	43.1788	40.7	240309	24	12	141	3.73	113735	24338	28346	5.5626	1.3367	Red
1049	Q8TER5	ARH40_HUMAN	Rho guanine nucleotide exchange factor 40 OS Homo sapiens GN ARHGEF40 PE 1 SV 3	Regular	43.1766	40.67	166369	26	12	109	1.84	52078	9873	16853	2.2565	0.3754	Red
5119	Q8TE73	DYH5_HUMAN	Dynein heavy chain 5 axonemal OS Homo sapiens GN DNAH5 PE 1 SV 3	Regular	43.1593	40.64	532843	59	32	386	2.31	395629	18073	92862	4.1307	2.201	Red	5125 5122
5368	Q8WYP5	ELYS_HUMAN	Protein ELYS OS Homo sapiens GN AHCTF1 PE 1 SV 3	Regular	43.0547	40.65	254381	18	13	163	3.44	58044	31879	20659	7.2862	1.8535	Red	28908
17047	Q9H2D6	TARA_HUMAN	TRIO and F actin binding protein OS Homo sapiens GN TRIOBP PE 1 SV 3	Regular	42.9895	40.62	264284	27	17	220	3.38	81987	23286	31982	5.3222	1.4066	Red	16444
4766	Q9NRI5	DISC1_HUMAN	Disrupted in schizophrenia 1 protein OS Homo sapiens GN DISC1 PE 1 SV 3	Regular	42.8134	40.72	94865.3	5	5	83	5.5	22637	20486	6080	4.6822	0.4442	Red
12870	O60658	PDE8A_HUMAN	High affinity cAMP specific and IBMX insensitive 3 5 cyclic phosphodiesterase 8A OS Homo sapiens G	Regular	42.7012	40.73	94444.7	16	8	60	1.33	164726	3558	26071	0.8132	0.0768	Red
3536	Q9NXG0	CNTLN_HUMAN	Centlein OS Homo sapiens GN CNTLN PE 2 SV 5	Regular	42.4653	40.83	162231	13	10	163	4.27	31138	15859	11225	3.6247	0.588	Red
12666	Q8TEW0	PARD3_HUMAN	Partitioning defective 3 homolog OS Homo sapiens GN PARD3 PE 1 SV 2	Regular	42.4125	40.89	151937	16	10	118	0.81	29877	4179	12546	0.9551	0.1451	Red
12827	A6NKB5	PCX2_HUMAN	Pecanex like protein 2 OS Homo sapiens GN PCNXL2 PE 1 SV 3	Regular	42.2043	41.15	240129	20	13	142	3.14	50206	8047	13441	1.8392	0.4416	Red
18847	Q9Y487	VPP2_HUMAN	V type proton ATPase 116 kDa subunit a isoform 2 OS Homo sapiens GN ATP6V0A2 PE 1 SV 2	Regular	42.1844	41.12	99166.1	14	6	57	2.22	37063	18764	12423	4.2886	0.4253	Red	8572 39058 35130 8660 35176
13461	Q86YR6	POTED_HUMAN	POTE ankyrin domain family member D OS Homo sapiens GN POTED PE 2 SV 2	Regular	42.0393	41.13	67649	6	3	54	1.37	10135	10131	5390	2.3155	0.1566	Red
10960	Q9UKX2	MYH2_HUMAN	Myosin 2 OS Homo sapiens GN MYH2 PE 1 SV 1	Regular	42.0375	41.11	224071	31	19	162	1.91	119015	3455.24	24867	0.7897	0.177	Red	10996 11002 10966 10956 10964 10959 10962 10961 10984 10963 10998 10958 10965
18538	P35125	UBP6_HUMAN	Ubiquitin carboxyl terminal hydrolase 6 OS Homo sapiens GN USP6 PE 1 SV 2	Regular	42.0029	41.12	160882	14	7	99	5.26	21772	10049.4	9057	2.2969	0.3695	Red	18514
8780	O60229	KALRN_HUMAN	Kalirin OS Homo sapiens GN KALRN PE 1 SV 2	Regular	41.8321	41.21	343311	26	14	246	0.54	263878	2446.58	43568	0.5592	0.192	Yellow	18092 33880
16231	Q07889	SOS1_HUMAN	Son of sevenless homolog 1 OS Homo sapiens GN SOS1 PE 1 SV 1	Regular	41.829	41.18	153434	22	11	115	1.43	67063	0	13105			Red	16232
4905	Q8N1I0	DOCK4_HUMAN	Dedicator of cytokinesis protein 4 OS Homo sapiens GN DOCK4 PE 1 SV 3	Regular	41.815	41.16	227032	26	15	168	1.48	74294	21605	20879	4.938	1.1211	Red	1768
8572	Q86UX2	ITIH5_HUMAN	Inter alpha trypsin inhibitor heavy chain H5 OS Homo sapiens GN ITIH5 PE 2 SV 2	Regular	41.7969	41.13	105090	10	6	75	2.97	37880	24813	7629	5.6712	0.596	Red	18847 39058 8660 35176
14505	O14827	RGRF2_HUMAN	Ras specific guanine nucleotide releasing factor 2 OS Homo sapiens GN RASGRF2 PE 1 SV 2	Regular	41.7585	41.1	142247	20	11	81	1.54	88213	9303	21737	2.1263	0.3025	Red
3617	Q99715	COCA1_HUMAN	Collagen alpha 1 XII chain OS Homo sapiens GN COL12A1 PE 1 SV 2	Regular	41.7305	41.11	334345	49	27	204	3.59	154461	20364	38971	4.6543	1.5562	Red
8801	Q8WYB5	KAT6B_HUMAN	Histone acetyltransferase KAT6B OS Homo sapiens GN KAT6B PE 1 SV 3	Regular	41.7231	41.08	234287	19	8	139	0.77	81305	91305	45124	20.8684	4.8892	Red
10558	O14686	MLL2_HUMAN	Histone lysine N methyltransferase MLL2 OS Homo sapiens GN MLL2 PE 1 SV 2	Regular	41.7089	41.05	599948	36	20	270	2.31	69618	25733	30988	5.8815	3.5286	Red
10017	O43283	M3K13_HUMAN	Mitogen activated protein kinase kinase kinase 13 OS Homo sapiens GN MAP3K13 PE 1 SV 1	Regular	41.6565	41.02	109494	11	8	64	5.28	58447	39082	7273	8.9325	0.978	Red
15876	Q9ULL8	SHRM4_HUMAN	Protein Shroom4 OS Homo sapiens GN SHROOM4 PE 1 SV 3	Regular	41.6387	41.04	167139	27	15	97	3.28	97518	12761	20876	2.9166	0.4875	Red
16474	Q9BX66	SRBS1_HUMAN	Sorbin and SH3 domain containing protein 1 OS Homo sapiens GN SORBS1 PE 1 SV 3	Regular	41.6195	41.01	142969	14	11	94	2.17	35468	3157.5	8725	0.7217	0.1032	Red
16792	Q9BX26	SYCP2_HUMAN	Synaptonemal complex protein 2 OS Homo sapiens GN SYCP2 PE 2 SV 2	Regular	41.6083	40.98	177350	22	13	143	3.46	113754	39712	22113	9.0765	1.6097	Red
5464	Q9UBC2	EP15R_HUMAN	Epidermal growth factor receptor substrate 15 like 1 OS Homo sapiens GN EPS15L1 PE 1 SV 1	Regular	41.3077	41.32	94369.3	17	9	74	4.51	182123	27923	20528	6.382	0.6023	Red
4829	P11532	DMD_HUMAN	Dystrophin OS Homo sapiens GN DMD PE 1 SV 3	Regular	41.2871	41.29	428803	41	25	318	1.06	104915	29903	39632	6.8345	2.9307	Red
4846	Q9Y485	DMXL1_HUMAN	DmX like protein 1 OS Homo sapiens GN DMXL1 PE 1 SV 3	Regular	41.2856	41.26	341660	21	13	196	1.85	53646	13657	16202	3.1214	1.0665	Red
7069	Q12967	GNDS_HUMAN	Ral guanine nucleotide dissociation stimulator OS Homo sapiens GN RALGDS PE 1 SV 2	Regular	41.0981	41.44	101633	7	6	55	3.28	10116	6217.5	4390	1.4211	0.1444	Red
618	Q99996	AKAP9_HUMAN	A kinase anchor protein 9 OS Homo sapiens GN AKAP9 PE 1 SV 3	Regular	41.0518	41.41	456006	57	35	411	3.71	156692	20141	49088	4.6034	2.0992	Red	5118 5114 12812
787	Q01484	ANK2_HUMAN	Ankyrin 2 OS Homo sapiens GN ANK2 PE 1 SV 4	Regular	40.9867	41.58	436224	61	30	326	1.92	177235	37813	75814	8.6424	3.77	Red	788
4797	Q9Y238	DLEC1_HUMAN	Deleted in lung and esophageal cancer protein 1 OS Homo sapiens GN DLEC1 PE 2 SV 2	Regular	40.9696	41.55	197851	19	12	103	1.71	74476	4849.5	21490	1.1084	0.2193	Red
4516	P43146	DCC_HUMAN	Netrin receptor DCC OS Homo sapiens GN DCC PE 1 SV 2	Regular	40.6996	41.72	159369	16	7	80	2.21	65977	44652	12765	10.2055	1.6264	Red
4753	Q9UPY3	DICER_HUMAN	Endoribonuclease Dicer OS Homo sapiens GN DICER1 PE 1 SV 3	Regular	40.6937	41.7	221419	20	12	148	2.03	63077	29196	17592	6.673	1.4775	Red
10853	Q13615	MTMR3_HUMAN	Myotubularin related protein 3 OS Homo sapiens GN MTMR3 PE 1 SV 3	Regular	40.4604	41.9	136242	11	9	92	4.59	44486	10373	9395	2.3708	0.323	Red
3666	Q17RW2	COOA1_HUMAN	Collagen alpha 1 XXIV chain OS Homo sapiens GN COL24A1 PE 2 SV 2	Regular	40.4375	41.88	176352	16	9	106	1.87	60424	8293.5	9392	1.8955	0.3343	Red
14982	Q5VT52	RPRD2_HUMAN	Regulation of nuclear pre mRNA domain containing protein 2 OS Homo sapiens GN RPRD2 PE 1 SV 1	Regular	40.3498	41.85	156476	13	8	111	1.51	20116	8082	10113	1.8472	0.289	Red
5115	Q9UFH2	DYH17_HUMAN	Dynein heavy chain 17 axonemal OS Homo sapiens GN DNAH17 PE 2 SV 2	Regular	40.0272	41.9	515609	58	37	374	2.34	339066	16447	66224	3.7591	1.9382	Red	5112 5123 25133 5114 5117
1585	Q8NFC6	BD1L1_HUMAN	Biorientation of chromosomes in cell division protein 1 like 1 OS Homo sapiens GN BOD1L1 PE 1 SV 2	Regular	39.8185	42.03	332634	28	15	232	2.62	51662	15100	25150	3.4512	1.148	Red
5580	Q14674	ESPL1_HUMAN	Separin OS Homo sapiens GN ESPL1 PE 1 SV 3	Regular	39.4745	42.27	236711	15	6	149	1.84	18972	7648.5	9504	1.7481	0.4138	Red
2122	Q9ULU8	CAPS1_HUMAN	Calcium dependent secretion activator 1 OS Homo sapiens GN CADPS PE 1 SV 3	Regular	39.3832	42.28	153870	14	9	99	1.26	32156	11097	9514	2.5363	0.3903	Red	2123
17176	Q9UGU0	TCF20_HUMAN	Transcription factor 20 OS Homo sapiens GN TCF20 PE 1 SV 3	Regular	39.2601	42.33	213254	26	14	140	2.14	98013	14654	17455	3.3493	0.7142	Red	37131 5120
10961	P11055	MYH3_HUMAN	Myosin 3 OS Homo sapiens GN MYH3 PE 1 SV 3	Regular	39.2216	42.34	224989	27	17	158	3.56	118305	18394	36450	4.2041	0.9459	Red	10962 11002 10966 10956 10963 10964 10960 10959 10958 10965
3009	Q12873	CHD3_HUMAN	Chromodomain helicase DNA binding protein 3 OS Homo sapiens GN CHD3 PE 1 SV 3	Regular	39.1973	42.39	228132	22	13	159	1.25	77872	31572	12728	7.216	1.6462	Red
15748	O75533	SF3B1_HUMAN	Splicing factor 3B subunit 1 OS Homo sapiens GN SF3B1 PE 1 SV 3	Regular	39.1829	42.4	146572	17	11	94	2.91	45198	33061	20072	7.5563	1.1075	Red
17292	Q9BXT5	TEX15_HUMAN	Testis expressed sequence 15 protein OS Homo sapiens GN TEX15 PE 1 SV 2	Regular	38.9598	42.6	319443	23	17	216	2.72	79844	25603	17929	5.8517	1.8693	Red
8073	Q9P2D0	IBTK_HUMAN	Inhibitor of Bruton tyrosine kinase OS Homo sapiens GN IBTK PE 1 SV 3	Regular	38.9118	42.57	152467	8	6	109	1.4	18962	10674	7681	2.4396	0.372	Red
18613	Q9NYU1	UGGG2_HUMAN	UDP glucose glycoprotein glucosyltransferase 2 OS Homo sapiens GN UGGT2 PE 1 SV 4	Regular	38.9095	42.54	175363	24	14	128	5.94	58349	28678	17049	6.5546	1.1494	Red
20183	Q9UDY2	ZO2_HUMAN	Tight junction protein ZO 2 OS Homo sapiens GN TJP2 PE 1 SV 2	Regular	38.8782	42.55	134186	16	8	105	1.51	32137	16914	13539	3.8658	0.5187	Red
13127	Q9H5I5	PIEZ2_HUMAN	Piezo type mechanosensitive ion channel component 2 OS Homo sapiens GN PIEZO2 PE 2 SV 2	Regular	38.6124	42.72	320859	19	13	211	1.74	131518	7047	44282	1.6106	0.5168	Red
9067	Q07866	KLC1_HUMAN	Kinesin light chain 1 OS Homo sapiens GN KLC1 PE 1 SV 2	Regular	38.5801	42.73	65822.9	5	6	65	7.33	25790	17144	8093	3.9184	0.2579	Red	9068
16337	Q9C093	SPEF2_HUMAN	Sperm flagellar protein 2 OS Homo sapiens GN SPEF2 PE 1 SV 2	Regular	38.5787	42.7	210381	17	12	155	1.98	41139	8319	16868	1.9014	0.4	Red
4984	Q12882	DPYD_HUMAN	Dihydropyrimidine dehydrogenase NADP OS Homo sapiens GN DPYD PE 1 SV 2	Regular	38.5241	42.67	113455	9	6	83	0.78	24104	4047	8587	0.925	0.1049	Red
10024	Q99683	M3K5_HUMAN	Mitogen activated protein kinase kinase kinase 5 OS Homo sapiens GN MAP3K5 PE 1 SV 1	Regular	38.4906	42.68	155849	13	7	112	1.46	81531	42060	12735	9.6131	1.4982	Red
11392	Q9UJF2	NGAP_HUMAN	Ras GTPase activating protein nGAP OS Homo sapiens GN RASAL2 PE 1 SV 2	Regular	38.3706	42.69	129698	24	10	99	3.51	57404	14534	17886	3.3218	0.4308	Red
16477	Q6ZRS2	SRCAP_HUMAN	Helicase SRCAP OS Homo sapiens GN SRCAP PE 1 SV 3	Regular	38.3592	42.66	345209	20	16	152	2.2	89478	28186	23968	6.4421	2.2239	Red
11431	Q8N4C6	NIN_HUMAN	Ninein OS Homo sapiens GN NIN PE 1 SV 4	Regular	38.3293	42.67	245359	33	20	187	3.01	93213	8685	21578	1.985	0.487	Red
10984	Q9Y6X6	MYO16_HUMAN	Unconventional myosin XVI OS Homo sapiens GN MYO16 PE 1 SV 3	Regular	38.321	42.64	208296	21	11	128	2.8	33193	8824	22907	2.0168	0.4201	Red	10996 10998 10960 10959
2003	O00555	CAC1A_HUMAN	Voltage dependent P Q type calcium channel subunit alpha 1A OS Homo sapiens GN CACNA1A PE 1 SV 2	Regular	38.3107	42.65	283962	23	10	165	4.03	57279	13471	20161	3.0789	0.8743	Red	2004
10561	Q8IZD2	MLL5_HUMAN	Histone lysine N methyltransferase MLL5 OS Homo sapiens GN MLL5 PE 1 SV 1	Regular	38.2657	42.62	207018	19	10	110	1.08	55944	36348	17521	8.3076	1.7198	Red
3008	O14647	CHD2_HUMAN	Chromodomain helicase DNA binding protein 2 OS Homo sapiens GN CHD2 PE 1 SV 2	Regular	38.241	42.6	212313	25	15	150	1.26	141109	16481.4	26701	3.7669	0.7998	Red	3007
4611	Q8IY21	DDX60_HUMAN	Probable ATP dependent RNA helicase DDX60 OS Homo sapiens GN DDX60 PE 1 SV 3	Regular	38.1548	42.57	199849	11	7	135	1.69	13012	5506.5	7693	1.2585	0.2515	Red
11706	Q9Y4C0	NRX3A_HUMAN	Neurexin 3 alpha OS Homo sapiens GN NRXN3 PE 1 SV 4	Regular	38.1331	42.58	182767	12	8	104	2.56	39662	2751	8888	0.6288	0.1149	Red
2556	Q86YA3	CD021_HUMAN	Uncharacterized protein C4orf21 OS Homo sapiens GN C4orf21 PE 1 SV 2	Regular	38.091	42.59	120488	15	9	91	3.58	58131	36088	18359	8.2482	0.9938	Red
16511	Q9UQ35	SRRM2_HUMAN	Serine arginine repetitive matrix protein 2 OS Homo sapiens GN SRRM2 PE 1 SV 2	Regular	38.0438	42.6	300357	21	12	189	2.33	111509	75998	40526	17.3699	5.2172	Red
5809	A6NE01	F186A_HUMAN	Protein FAM186A OS Homo sapiens GN FAM186A PE 2 SV 3	Regular	37.9987	42.57	263158	31	15	161	2.34	101251	26669	20825	6.0954	1.604	Red
4612	Q5H9U9	DDX6L_HUMAN	Probable ATP dependent RNA helicase DDX60 like OS Homo sapiens GN DDX60L PE 2 SV 2	Regular	37.9898	42.58	199955	27	13	135	2.93	43259	8076	18246	1.8458	0.3691	Red
10316	Q93074	MED12_HUMAN	Mediator of RNA polymerase II transcription subunit 12 OS Homo sapiens GN MED12 PE 1 SV 4	Regular	37.9233	42.59	245819	35	15	144	2.43	102050	10808	40334	2.4702	0.6072	Red
5654	Q06265	EXOS9_HUMAN	Exosome complex component RRP45 OS Homo sapiens GN EXOSC9 PE 1 SV 3	Regular	37.8784	42.56	49576.4	10	7	29	5.01	46786	18396	5621	4.2045	0.2084	Red
18612	Q9NYU2	UGGG1_HUMAN	UDP glucose glycoprotein glucosyltransferase 1 OS Homo sapiens GN UGGT1 PE 1 SV 3	Regular	37.8572	42.53	177931	18	8	116	2.25	30734	9264	23677	2.1174	0.3767	Red
1637	Q9Y6D6	BIG1_HUMAN	Brefeldin A inhibited guanine nucleotide exchange protein 1 OS Homo sapiens GN ARFGEF1 PE 1 SV 2	Regular	37.85	42.51	210992	21	12	132	2	52738	15842	19655	3.6208	0.764	Red	1638
9649	Q5T7N2	LITD1_HUMAN	LINE 1 type transposase domain containing protein 1 OS Homo sapiens GN L1TD1 PE 1 SV 1	Regular	37.83	42.48	99305.9	12	5	94	2.31	44333	15750	8564	3.5998	0.3575	Red
7106	Q13439	GOGA4_HUMAN	Golgin subfamily A member 4 OS Homo sapiens GN GOLGA4 PE 1 SV 1	Regular	37.7689	42.45	262053	35	24	278	2.11	177019	17257	35979	3.9442	1.0336	Red	14820
10935	Q8TBZ2	MYBPP_HUMAN	MYCBP associated protein OS Homo sapiens GN MYCBPAP PE 1 SV 2	Regular	37.7468	42.42	108666	7	4	83	1.06	7794	4488	4507	1.0258	0.1115	Red
18321	Q5TAX3	TUT4_HUMAN	Terminal uridylyltransferase 4 OS Homo sapiens GN ZCCHC11 PE 1 SV 3	Regular	37.7355	42.4	188131	16	10	162	1.82	84266	17557	15272	4.0128	0.7549	Red
10352	Q5TIA1	MEI1_HUMAN	Meiosis inhibitor protein 1 OS Homo sapiens GN MEI1 PE 2 SV 2	Regular	37.728	42.37	142986	15	9	89	2.83	35288	4566	11591	1.0436	0.1492	Red
11219	Q9GZM8	NDEL1_HUMAN	Nuclear distribution protein nudE like 1 OS Homo sapiens GN NDEL1 PE 1 SV 1	Regular	37.6132	42.34	38545.9	11	6	41	2.03	29428	22959	11991	5.2474	0.2023	Red
12872	O76083	PDE9A_HUMAN	High affinity cGMP specific 3 5 cyclic phosphodiesterase 9A OS Homo sapiens GN PDE9A PE 1 SV 1	Regular	37.4345	42.54	69519.3	7	5	53	5.73	13153	3760	3443	0.8594	0.0597	Red
4071	Q6UVK1	CSPG4_HUMAN	Chondroitin sulfate proteoglycan 4 OS Homo sapiens GN CSPG4 PE 1 SV 2	Regular	37.2137	42.66	251221	16	12	119	3.45	48735	27285	16556	6.2362	1.5667	Red
5625	Q92817	EVPL_HUMAN	Envoplakin OS Homo sapiens GN EVPL PE 1 SV 3	Regular	37.2026	42.63	232916	32	22	210	2.21	82517	14249	23465	3.2567	0.7585	Red
12672	O95453	PARN_HUMAN	Poly A specific ribonuclease PARN OS Homo sapiens GN PARN PE 1 SV 1	Regular	37.1527	42.6	73964.3	9	5	53	5.48	11861	4660	2571	1.0651	0.0788	Red
16821	O14994	SYN3_HUMAN	Synapsin 3 OS Homo sapiens GN SYN3 PE 1 SV 2	Regular	37.1357	42.57	63530.9	6	4	36	5.69	14787	3987	5563	0.9113	0.0579	Red
17872	P11388	TOP2A_HUMAN	DNA topoisomerase 2 alpha OS Homo sapiens GN TOP2A PE 1 SV 3	Regular	37.1175	42.58	175127	23	11	132	2.16	78673	3085.23	20953	0.7052	0.1235	Red	17873
14625	Q13671	RIN1_HUMAN	Ras and Rab interactor 1 OS Homo sapiens GN RIN1 PE 1 SV 4	Regular	37.1113	42.56	84954.4	13	7	54	8.05	45211	22478	13391	5.1375	0.4365	Red
1270	Q93084	AT2A3_HUMAN	Sarcoplasmic endoplasmic reticulum calcium ATPase 3 OS Homo sapiens GN ATP2A3 PE 1 SV 2	Regular	37.0257	42.57	115517	6	6	70	2.88	63690	42323.1	6678	9.6732	1.1174	Red	1268 1269
13372	P54277	PMS1_HUMAN	PMS1 protein homolog 1 OS Homo sapiens GN PMS1 PE 1 SV 1	Regular	36.9764	42.61	106686	17	9	75	2.25	75165	24861	18151	5.6822	0.6062	Red
225	Q86UQ4	ABCAD_HUMAN	ATP binding cassette sub family A member 13 OS Homo sapiens GN ABCA13 PE 2 SV 3	Regular	36.8786	42.66	580894	41	20	352	1.36	91077	35847	37122	8.1931	4.7593	Red
15136	Q8WXA3	RUFY2_HUMAN	RUN and FYVE domain containing protein 2 OS Homo sapiens GN RUFY2 PE 1 SV 2	Regular	36.8522	42.63	75853.5	12	8	61	4.43	44677	6825	14603	1.5599	0.1183	Red
1544	Q8NFJ9	BBS1_HUMAN	Bardet Biedl syndrome 1 protein OS Homo sapiens GN BBS1 PE 1 SV 1	Regular	36.8502	42.6	65539.8	7	3	47	2.53	14925	9969	10266	2.2785	0.1493	Red
2931	Q8WVR3	CG043_HUMAN	Uncharacterized protein C7orf43 OS Homo sapiens GN C7orf43 PE 1 SV 2	Regular	36.8411	42.58	63338.4	8	5	45	1.72	22781	9072	7110	2.0735	0.1313	Red
18710	Q08AM6	VAC14_HUMAN	Protein VAC14 homolog OS Homo sapiens GN VAC14 PE 1 SV 1	Regular	36.8347	42.55	88999.3	9	5	59	4.99	23899	5364	5433	1.226	0.1091	Red
10246	O60942	MCE1_HUMAN	mRNA capping enzyme OS Homo sapiens GN RNGTT PE 1 SV 1	Regular	36.7729	42.56	69469.3	10	5	46	1.34	24569	53310	6381	12.1844	0.8464	Red
19863	Q92618	ZN516_HUMAN	Zinc finger protein 516 OS Homo sapiens GN ZNF516 PE 1 SV 1	Regular	36.7601	42.53	126399	10	8	102	2.32	21421	3019.5	8098	0.6901	0.0872	Red
11140	Q8NFP9	NBEA_HUMAN	Neurobeachin OS Homo sapiens GN NBEA PE 1 SV 3	Regular	36.7553	42.51	330274	32	17	222	1.6	196680	15568	31002	3.5582	1.1752	Red	9749
1064	Q96PE2	ARHGH_HUMAN	Rho guanine nucleotide exchange factor 17 OS Homo sapiens GN ARHGEF17 PE 1 SV 1	Regular	36.7438	42.48	223783	13	8	149	2.71	45455	17281	7505	3.9497	0.8839	Red
10925	Q9NR99	MXRA5_HUMAN	Matrix remodeling associated protein 5 OS Homo sapiens GN MXRA5 PE 2 SV 3	Regular	36.7037	42.49	314261	35	21	205	2.86	128601	38784	32871	8.8644	2.7857	Red
16651	O94804	STK10_HUMAN	Serine threonine protein kinase 10 OS Homo sapiens GN STK10 PE 1 SV 1	Regular	36.5002	42.71	112820	14	11	96	3.93	95389	15288	15284	3.4942	0.3942	Red	39234 5125 26594 18092 31963 1302 968 13591 31173 38504 17431
3406	O76031	CLPX_HUMAN	ATP dependent Clp protease ATP binding subunit clpX like mitochondrial OS Homo sapiens GN CLPX PE 1	Regular	36.372	42.76	69965.2	13	7	60	2.05	12861	6471	5763	1.479	0.1035	Red
15887	Q9P2F8	SI1L2_HUMAN	Signal induced proliferation associated 1 like protein 2 OS Homo sapiens GN SIPA1L2 PE 1 SV 2	Regular	36.3315	42.77	192491	16	8	142	2.09	47499	15737	14658	3.5968	0.6924	Red
1430	Q9UPN4	AZI1_HUMAN	5 azacytidine induced protein 1 OS Homo sapiens GN AZI1 PE 1 SV 3	Regular	36.3296	42.74	122605	15	12	111	3.79	135979	33172	34794	7.5817	0.9296	Red
3630	Q96JB2	COG3_HUMAN	Conserved oligomeric Golgi complex subunit 3 OS Homo sapiens GN COG3 PE 1 SV 3	Regular	36.3002	42.71	95065.5	7	6	70	1.93	23835	9258	9625	2.116	0.2012	Red
7301	Q3V6T2	GRDN_HUMAN	Girdin OS Homo sapiens GN CCDC88A PE 1 SV 2	Regular	36.2354	42.72	216726	42	21	178	1.71	130123	20124	37627	4.5995	0.9968	Red
4899	Q5JSL3	DOC11_HUMAN	Dedicator of cytokinesis protein 11 OS Homo sapiens GN DOCK11 PE 1 SV 2	Regular	36.1995	42.7	240294	27	16	172	3.67	61981	19107	30071	4.367	1.0494	Red	4898 4910
5479	Q9HCE0	EPG5_HUMAN	Ectopic P granules protein 5 homolog OS Homo sapiens GN EPG5 PE 2 SV 2	Regular	36.1989	42.67	295390	15	7	165	2.48	23199	14229	12859	3.2521	0.9606	Red
1341	Q13315	ATM_HUMAN	Serine protein kinase ATM OS Homo sapiens GN ATM PE 1 SV 3	Regular	36.1711	42.68	355791	28	18	255	2.45	108880	33494	22756	7.6553	2.7237	Red
3244	Q14008	CKAP5_HUMAN	Cytoskeleton associated protein 5 OS Homo sapiens GN CKAP5 PE 1 SV 3	Regular	36.0666	42.76	227206	27	15	178	2.31	86033	7245	23053	1.6559	0.3762	Red
1728	Q12830	BPTF_HUMAN	Nucleosome remodeling factor subunit BPTF OS Homo sapiens GN BPTF PE 1 SV 3	Regular	36.0031	42.73	341000	30	16	225	1.94	166394	72890	30490	16.6595	5.6809	Red	38847
17411	P00734	THRB_HUMAN	Prothrombin OS Homo sapiens GN F2 PE 1 SV 2	Regular	35.9561	42.74	71519.7	13	7	47	5.95	45036	27458	7659	6.2757	0.4488	Red
9414	A4D0S4	LAMB4_HUMAN	Laminin subunit beta 4 OS Homo sapiens GN LAMB4 PE 2 SV 1	Regular	35.9425	42.72	200896	6	6	121	2.5	31516	26246	6163	5.9987	1.2051	Red
4393	Q5M775	CYTSB_HUMAN	Cytospin B OS Homo sapiens GN SPECC1 PE 1 SV 1	Regular	35.9399	42.69	119269	10	8	91	3.84	46471	34025	10630	7.7767	0.9275	Red
9720	P09848	LPH_HUMAN	Lactase phlorizin hydrolase OS Homo sapiens GN LCT PE 1 SV 3	Regular	35.8164	42.7	219670	28	16	128	1.76	60340	19992	21118	4.5693	1.0037	Red
5111	Q8IVF4	DYH10_HUMAN	Dynein heavy chain 10 axonemal OS Homo sapiens GN DNAH10 PE 1 SV 4	Regular	35.7465	42.67	518035	65	36	370	2.48	172164	22779	43932	5.2063	2.697	Red	5112 5122 5123
7116	Q3T8J9	GON4L_HUMAN	GON 4 like protein OS Homo sapiens GN GON4L PE 1 SV 1	Regular	35.6879	42.72	250617	10	5	169	0.67	9868	4626	6090	1.0573	0.265	Red
15807	O95470	SGPL1_HUMAN	Sphingosine 1 phosphate lyase 1 OS Homo sapiens GN SGPL1 PE 1 SV 3	Regular	35.678	42.69	64094.2	18	7	41	2.99	30979	22993.5	9464	5.2553	0.3368	Red
2045	Q8N3J6	CADM2_HUMAN	Cell adhesion molecule 2 OS Homo sapiens GN CADM2 PE 2 SV 1	Regular	35.6305	42.66	48010.2	6	4	24	5.98	10373	8748	5782	1.9994	0.096	Red
12733	Q6V1P9	PCD23_HUMAN	Protocadherin 23 OS Homo sapiens GN DCHS2 PE 2 SV 1	Regular	35.5801	42.64	323945	19	10	192	1.51	37726	8813	11605	2.0143	0.6525	Red
13285	Q15111	PLCL1_HUMAN	Inactive phospholipase C like protein 1 OS Homo sapiens GN PLCL1 PE 1 SV 3	Regular	35.5317	42.65	124439	10	7	82	3.29	43103	7917	10179	1.8095	0.2252	Red
11766	P57740	NU107_HUMAN	Nuclear pore complex protein Nup107 OS Homo sapiens GN NUP107 PE 1 SV 1	Regular	35.4893	42.66	107116	14	12	77	3.35	39406	7752	14785	1.7718	0.1898	Red
3760	O43303	CP110_HUMAN	Centriolar coiled coil protein of 110 kDa OS Homo sapiens GN CCP110 PE 1 SV 3	Regular	35.4002	42.7	114223	9	5	80	4.35	16115	8711	4100	1.991	0.2274	Red
19578	Q15911	ZFHX3_HUMAN	Zinc finger homeobox protein 3 OS Homo sapiens GN ZFHX3 PE 1 SV 2	Regular	35.3291	42.71	409096	38	21	242	2.3	126906	15815.7	37876	3.6148	1.4788	Red	19579
5123	Q9NYC9	DYH9_HUMAN	Dynein heavy chain 9 axonemal OS Homo sapiens GN DNAH9 PE 1 SV 3	Regular	35.1237	42.86	515927	42	28	367	3.08	160048	16765	32721	3.8318	1.9769	Red	5112 5122 5111 5115 5117
9107	Q9Y2M5	KLH20_HUMAN	Kelch like protein 20 OS Homo sapiens GN KLHL20 PE 1 SV 4	Regular	35.0669	42.87	68924.2	5	4	55	1.81	19637	2565	2909	0.5862	0.0404	Red
687	Q9UM73	ALK_HUMAN	ALK tyrosine kinase receptor OS Homo sapiens GN ALK PE 1 SV 3	Regular	35.0595	42.84	178666	12	5	105	1.48	36960	46035	6146	10.5216	1.8799	Red
19000	Q96KV7	WDR90_HUMAN	WD repeat containing protein 90 OS Homo sapiens GN WDR90 PE 1 SV 2	Regular	35.0237	42.81	190802	13	9	103	0.63	27134	9495	9432	2.1701	0.4141	Red
2004	Q00975	CAC1B_HUMAN	Voltage dependent N type calcium channel subunit alpha 1B OS Homo sapiens GN CACNA1B PE 1 SV 1	Regular	34.9191	42.96	264721	23	11	155	4.19	62727	32860	19987	7.5104	1.9882	Red	2003
10966	P13535	MYH8_HUMAN	Myosin 8 OS Homo sapiens GN MYH8 PE 1 SV 3	Regular	34.7839	42.93	223732	42	24	158	2.22	153253	16880.7	38096	3.8582	0.8632	Red	10962 11002 10961 10956 10963 10964 10960 10959 10958 10965
2771	Q5VT06	CE350_HUMAN	Centrosome associated protein 350 OS Homo sapiens GN CEP350 PE 1 SV 1	Regular	34.6639	42.94	352527	38	20	278	1.41	134353	13570	44120	3.1015	1.0934	Red	16338 29912
1302	Q9ULI0	ATD2B_HUMAN	ATPase family AAA domain containing protein 2B OS Homo sapiens GN ATAD2B PE 1 SV 3	Regular	34.5494	42.92	166454	15	11	116	2.95	53195	12041	9000	2.7521	0.4581	Red	39234 5125 26594 18092 31963 968 13591 31173 38504 16651 17431
10930	Q8IUG5	MY18B_HUMAN	Unconventional myosin XVIIIb OS Homo sapiens GN MYO18B PE 1 SV 1	Regular	34.4487	43.06	287352	41	30	236	4.36	220385	44998	43635	10.2846	2.9553	Red	24877 39681
18244	Q5TCY1	TTBK1_HUMAN	Tau tubulin kinase 1 OS Homo sapiens GN TTBK1 PE 1 SV 2	Regular	34.431	43.04	143079	13	8	106	2.42	39538	15133.5	9137	3.4589	0.4949	Red
10997	Q9ULV0	MYO5B_HUMAN	Unconventional myosin Vb OS Homo sapiens GN MYO5B PE 1 SV 3	Regular	34.4032	43.05	215270	23	16	169	3.79	99739	27769	22659	6.3468	1.3663	Red	10996 10998
11142	Q6ZNJ1	NBEL2_HUMAN	Neurobeachin like protein 2 OS Homo sapiens GN NBEAL2 PE 1 SV 2	Regular	34.2345	43.12	305596	22	12	170	2.87	65085	31695	16748	7.2441	2.2138	Red
17873	Q02880	TOP2B_HUMAN	DNA topoisomerase 2 beta OS Homo sapiens GN TOP2B PE 1 SV 3	Regular	34.1139	43.13	184237	14	13	139	5.47	65212	25777	10079	5.8915	1.0854	Red	17872
372	Q4L235	ACSF4_HUMAN	Acyl CoA synthetase family member 4 OS Homo sapiens GN AASDH PE 2 SV 3	Regular	34.0645	43.21	124593	8	7	73	2.55	39325	14258	9691	3.2588	0.406	Red
16446	Q9H254	SPTN4_HUMAN	Spectrin beta chain non erythrocytic 4 OS Homo sapiens GN SPTBN4 PE 1 SV 2	Regular	33.8956	43.48	290183	29	16	245	2.61	109502	32952	37227	7.5314	2.1855	Red	4549
1262	P13637	AT1A3_HUMAN	Sodium potassium transporting ATPase subunit alpha 3 OS Homo sapiens GN ATP1A3 PE 1 SV 3	Regular	33.8899	43.49	113174	8	4	68	2.86	14749	0	3846			Red	1261 1260 1254
1060	O15085	ARHGB_HUMAN	Rho guanine nucleotide exchange factor 11 OS Homo sapiens GN ARHGEF11 PE 1 SV 1	Regular	33.8006	43.47	168560	26	10	112	1.25	94646	20194.5	24225	4.6156	0.778	Red
12983	O00628	PEX7_HUMAN	Peroxisomal targeting signal 2 receptor OS Homo sapiens GN PEX7 PE 1 SV 1	Regular	33.7166	43.47	36632.9	10	4	18	8.98	14069	11223	8013	2.5651	0.094	Red
6120	Q9NYQ8	FAT2_HUMAN	Protocadherin Fat 2 OS Homo sapiens GN FAT2 PE 1 SV 2	Regular	33.6451	43.48	482397	28	19	276	2.87	161218	27027	41277	6.1772	2.9799	Red
5582	B1AK53	ESPN_HUMAN	Espin OS Homo sapiens GN ESPN PE 1 SV 1	Regular	33.6156	43.46	92645.1	10	5	56	4.33	22084	18073.5	8691	4.1308	0.3827	Red
6263	Q6ZV73	FGD6_HUMAN	FYVE RhoGEF and PH domain containing protein 6 OS Homo sapiens GN FGD6 PE 1 SV 2	Regular	33.6015	43.43	162699	12	7	139	1.89	27244	16703	7749	3.8176	0.6211	Red
19566	Q9H2Y7	ZF106_HUMAN	Zinc finger protein 106 homolog OS Homo sapiens GN ZFP106 PE 1 SV 1	Regular	33.502	43.44	210822	16	10	152	1.22	44903	3913.5	21463	0.8945	0.1886	Red
18499	O94966	UBP19_HUMAN	Ubiquitin carboxyl terminal hydrolase 19 OS Homo sapiens GN USP19 PE 1 SV 2	Regular	33.4698	43.41	147533	8	8	92	2.28	20243	7143	4850	1.6326	0.2409	Red	36296 25356
7265	Q5T3I0	GPTC4_HUMAN	G patch domain containing protein 4 OS Homo sapiens GN GPATCH4 PE 1 SV 2	Regular	33.4038	43.45	50609.4	6	2	49	2.91	3509	6657	2689	1.5215	0.077	Red
2372	Q8NDH2	CC168_HUMAN	Coiled coil domain containing protein 168 OS Homo sapiens GN CCDC168 PE 2 SV 2	Regular	33.3884	43.46	279776	33	19	221	2.57	84383	15005	27109	3.4295	0.9595	Red
855	Q9ULJ7	ANR50_HUMAN	Ankyrin repeat domain containing protein 50 OS Homo sapiens GN ANKRD50 PE 1 SV 4	Regular	33.3224	43.5	157798	11	5	98	1.26	15519	9720	6608	2.2216	0.3506	Red
2326	Q8TBZ0	CC110_HUMAN	Coiled coil domain containing protein 110 OS Homo sapiens GN CCDC110 PE 2 SV 1	Regular	33.2207	43.57	97296	11	7	80	1.2	38840	3414	5451	0.7803	0.0759	Red
17432	Q8IVF5	TIAM2_HUMAN	T lymphoma invasion and metastasis inducing protein 2 OS Homo sapiens GN TIAM2 PE 2 SV 4	Regular	33.2124	43.55	191757	17	13	134	1.7	70604	23823	13292	5.4449	1.0441	Red
12947	Q96RR1	PEO1_HUMAN	Twinkle protein mitochondrial OS Homo sapiens GN PEO1 PE 1 SV 1	Regular	33.1535	43.62	77667.5	6	4	57	3.51	198673	5818.5	59582	1.3299	0.1033	Red
10983	Q9UKN7	MYO15_HUMAN	Unconventional myosin XV OS Homo sapiens GN MYO15A PE 1 SV 2	Regular	33.1048	43.6	397859	41	19	251	2.49	113231	43636	23830	9.9733	3.968	Red	33002
1114	Q96C12	ARMC5_HUMAN	Armadillo repeat containing protein 5 OS Homo sapiens GN ARMC5 PE 2 SV 2	Regular	32.8932	43.7	99164.4	9	5	58	5.35	145524	10292	7676	2.3523	0.2333	Red
17244	O75443	TECTA_HUMAN	Alpha tectorin OS Homo sapiens GN TECTA PE 1 SV 3	Regular	32.8682	43.68	247853	19	12	129	2.69	61278	30094	12139	6.8782	1.7048	Red
16597	P78524	ST5_HUMAN	Suppression of tumorigenicity 5 protein OS Homo sapiens GN ST5 PE 1 SV 3	Regular	32.8504	43.65	127682	7	5	89	2.46	48281	22834.5	8881	5.219	0.6664	Red
4902	Q14185	DOCK1_HUMAN	Dedicator of cytokinesis protein 1 OS Homo sapiens GN DOCK1 PE 1 SV 2	Regular	32.8471	43.63	216316	17	10	153	2.57	37777	9390	20911	2.1462	0.4642	Red
18517	Q9P2H5	UBP35_HUMAN	Ubiquitin carboxyl terminal hydrolase 35 OS Homo sapiens GN USP35 PE 1 SV 3	Regular	32.7592	43.63	115116	8	6	88	6.78	22330	17973	9758	4.1079	0.4729	Red
9409	Q16363	LAMA4_HUMAN	Laminin subunit alpha 4 OS Homo sapiens GN LAMA4 PE 1 SV 4	Regular	32.746	43.61	205148	28	12	139	1.87	92433	13684	24259	3.1276	0.6416	Red
941	Q9H1A4	APC1_HUMAN	Anaphase promoting complex subunit 1 OS Homo sapiens GN ANAPC1 PE 1 SV 1	Regular	32.7402	43.58	218667	12	10	135	2.31	70264	6139	26731	1.4031	0.3068	Red
15055	Q92681	RSCA1_HUMAN	Regulatory solute carrier protein family 1 member 1 OS Homo sapiens GN RSC1A1 PE 2 SV 1	Regular	32.6954	43.56	67474.1	9	4	39	2.43	27162	6534	6584	1.4934	0.1008	Red
8425	O94829	IPO13_HUMAN	Importin 13 OS Homo sapiens GN IPO13 PE 1 SV 3	Regular	32.5156	43.66	109393	5	5	58	3.63	9844	5871	5660	1.3419	0.1468	Red
10468	Q5JRA6	MIA3_HUMAN	Melanoma inhibitory activity protein 3 OS Homo sapiens GN MIA3 PE 1 SV 1	Regular	32.4768	43.64	214387	28	16	174	2.94	138039	48631	35423	11.115	2.3829	Red
4731	Q7Z478	DHX29_HUMAN	ATP dependent RNA helicase DHX29 OS Homo sapiens GN DHX29 PE 1 SV 2	Regular	32.3975	43.65	156319	14	8	112	3.73	33582	15877	13965	3.6288	0.5673	Red
10165	Q9Y4F3	MARF1_HUMAN	Meiosis arrest female protein 1 OS Homo sapiens GN KIAA0430 PE 1 SV 6	Regular	32.3973	43.62	195939	25	14	126	3.67	63700	34288	14560	7.8368	1.5355	Red
16438	P11277	SPTB1_HUMAN	Spectrin beta chain erythrocytic OS Homo sapiens GN SPTB PE 1 SV 5	Regular	32.3605	43.63	247324	13	12	217	1.54	33041	8403.34	8268	1.9206	0.475	Red	16439
11011	Q5VU43	MYOME_HUMAN	Myomegalin OS Homo sapiens GN PDE4DIP PE 2 SV 1	Regular	32.3386	43.64	266506	23	13	217	1.66	109404	8796	17740	2.0104	0.5358	Red
17845	Q8NDV7	TNR6A_HUMAN	Trinucleotide repeat containing gene 6A protein OS Homo sapiens GN TNRC6A PE 1 SV 2	Regular	32.2311	43.64	211096	11	8	110	1.22	17895	5445	6381	1.2445	0.2627	Red
14491	Q8N1W1	RGNEF_HUMAN	Rho guanine nucleotide exchange factor OS Homo sapiens GN RGNEF PE 1 SV 3	Regular	32.0565	43.75	194001	29	15	129	1.82	57639	6825	21195	1.5599	0.3026	Red
18019	Q07283	TRHY_HUMAN	Trichohyalin OS Homo sapiens GN TCHH PE 1 SV 2	Regular	31.9947	43.72	254382	23	14	224	2.68	70980	22801	24998	5.2113	1.3257	Red
2744	Q9H799	CE042_HUMAN	Uncharacterized protein C5orf42 OS Homo sapiens GN C5orf42 PE 1 SV 4	Regular	31.9871	43.7	365510	21	16	232	1.78	61238	5933	21189	1.356	0.4956	Red
10132	Q7Z304	MAMC2_HUMAN	MAM domain containing protein 2 OS Homo sapiens GN MAMDC2 PE 2 SV 3	Regular	31.8159	43.74	78639.3	10	6	45	3.64	44665	11826	6692	2.7029	0.2126	Red
10498	Q8N4C8	MINK1_HUMAN	Misshapen like kinase 1 OS Homo sapiens GN MINK1 PE 1 SV 2	Regular	31.7977	43.71	150506	15	6	97	1.95	100799	27165.1	15218	6.2088	0.9345	Red	17811
2706	O76039	CDKL5_HUMAN	Cyclin dependent kinase like 5 OS Homo sapiens GN CDKL5 PE 1 SV 1	Regular	31.6343	43.69	116222	14	7	92	4.66	43214	6844	7490	1.5642	0.1818	Red	9167
3547	Q8WYK1	CNTP5_HUMAN	Contactin associated protein like 5 OS Homo sapiens GN CNTNAP5 PE 2 SV 1	Regular	31.542	43.76	147733	7	5	81	2.3	37614	10460	7742	2.3907	0.3532	Red
13346	Q9UIW2	PLXA1_HUMAN	Plexin A1 OS Homo sapiens GN PLXNA1 PE 1 SV 3	Regular	31.497	43.73	214261	20	10	126	1.85	31913	9838.5	17686	2.2487	0.4818	Red
9749	P50851	LRBA_HUMAN	Lipopolysaccharide responsive and beige like anchor protein OS Homo sapiens GN LRBA PE 1 SV 4	Regular	31.4965	43.71	321789	21	12	205	2.58	53538	26048	16947	5.9535	1.9158	Red	11140
3578	P01024	CO3_HUMAN	Complement C3 OS Homo sapiens GN C3 PE 1 SV 2	Regular	31.4418	43.71	188688	36	16	136	1.38	75005	5407.5	22826	1.2359	0.2332	Red
13230	Q86WI1	PKHL1_HUMAN	Fibrocystin L OS Homo sapiens GN PKHD1L1 PE 2 SV 2	Regular	31.4338	43.69	470582	29	15	220	2.83	80892	23152	25396	5.2916	2.4901	Red	13677
11000	Q13402	MYO7A_HUMAN	Unconventional myosin VIIa OS Homo sapiens GN MYO7A PE 1 SV 1	Regular	31.377	43.7	256574	18	10	173	1.63	62694	23308	24250	5.3272	1.3668	Red
8652	O15063	K0355_HUMAN	Uncharacterized protein KIAA0355 OS Homo sapiens GN KIAA0355 PE 1 SV 2	Regular	31.3742	43.67	117275	6	3	73	1.12	5318	8577	2037	1.9603	0.2299	Red
10962	Q9Y623	MYH4_HUMAN	Myosin 4 OS Homo sapiens GN MYH4 PE 1 SV 2	Regular	31.1928	43.71	224041	26	16	163	2.84	50016	4023.9	25292	0.9197	0.206	Red	11002 10966 10961 10956 10963 10964 10960 10959 10958 10965
8020	Q4G0P3	HYDIN_HUMAN	Hydrocephalus inducing protein homolog OS Homo sapiens GN HYDIN PE 1 SV 3	Regular	31.1914	43.69	581311	29	20	346	2.09	127869	45763	34889	10.4595	6.0802	Red
1837	Q2TBE0	C19L2_HUMAN	CWF19 like protein 2 OS Homo sapiens GN CWF19L2 PE 1 SV 4	Regular	31.1496	43.69	104357	11	7	90	2.24	20484	2259	8762	0.5163	0.0539	Red	2766
11712	Q9BZ95	NSD3_HUMAN	Histone lysine N methyltransferase NSD3 OS Homo sapiens GN WHSC1L1 PE 1 SV 1	Regular	31.0203	43.83	165434	10	5	107	4.31	26519	13380	6303	3.0581	0.5059	Red
17272	P22105	TENX_HUMAN	Tenascin X OS Homo sapiens GN TNXB PE 1 SV 3	Regular	30.9499	43.8	471340	20	15	325	1.94	72654	28006	18408	6.401	3.017	Red
948	P25054	APC_HUMAN	Adenomatous polyposis coli protein OS Homo sapiens GN APC PE 1 SV 2	Regular	30.8918	43.78	313813	22	18	233	2.64	62216	11034	24311	2.5219	0.7914	Red
10635	Q13724	MOGS_HUMAN	Mannosyl oligosaccharide glucosidase OS Homo sapiens GN MOGS PE 1 SV 5	Regular	30.8313	43.82	92088.8	7	6	54	2.15	23791	7195.5	4992	1.6446	0.1514	Red
16338	Q15772	SPEG_HUMAN	Striated muscle preferentially expressed protein kinase OS Homo sapiens GN SPEG PE 1 SV 4	Regular	30.7741	43.85	357083	31	17	213	2.42	231480	59901	22969	13.6908	4.8888	Red	29912 2771
1583	P11274	BCR_HUMAN	Breakpoint cluster region protein OS Homo sapiens GN BCR PE 1 SV 2	Regular	30.6728	43.86	143846	6	8	99	2.68	24754	7392	10861	1.6895	0.243	Red
5852	Q5VWN6	F208B_HUMAN	Protein FAM208B OS Homo sapiens GN FAM208B PE 1 SV 1	Regular	30.6139	43.87	271865	33	19	180	3.42	172189	16203	36740	3.7033	1.0068	Red
2325	Q6ZU64	CC108_HUMAN	Coiled coil domain containing protein 108 OS Homo sapiens GN CCDC108 PE 2 SV 2	Regular	30.5941	43.84	220387	16	9	134	1.51	42795	8250	8773	1.8856	0.4156	Red
13678	Q70Z35	PREX2_HUMAN	Phosphatidylinositol 3 4 5 trisphosphate dependent Rac exchanger 2 protein OS Homo sapiens GN PREX2	Regular	30.5612	43.82	185246	10	9	118	2.8	23544	4718	10421	1.0783	0.1998	Red
6329	P02751	FINC_HUMAN	Fibronectin OS Homo sapiens GN FN1 PE 1 SV 4	Regular	30.5265	43.92	266218	12	7	145	2.01	20837	13549	9940	3.0967	0.8244	Red
215	Q99758	ABCA3_HUMAN	ATP binding cassette sub family A member 3 OS Homo sapiens GN ABCA3 PE 1 SV 2	Regular	30.4519	43.93	192959	17	9	123	1.12	57645	36642	12832	8.3748	1.616	Red
17048	Q13395	TARB1_HUMAN	Probable methyltransferase TARBP1 OS Homo sapiens GN TARBP1 PE 1 SV 1	Regular	30.4454	43.9	183956	18	9	112	1.79	44460	3921	11662	0.8962	0.1649	Red
750	Q9BXX3	AN30A_HUMAN	Ankyrin repeat domain containing protein 30A OS Homo sapiens GN ANKRD30A PE 1 SV 3	Regular	30.428	43.94	160546	14	11	134	2.22	29340	8725	15715	1.9942	0.3202	Red
933	Q92870	APBB2_HUMAN	Amyloid beta A4 precursor protein binding family B member 2 OS Homo sapiens GN APBB2 PE 1 SV 3	Regular	30.4274	43.92	84286.3	5	4	67	6.86	12372	9607	3972	2.1957	0.1851	Red
6514	Q5TBA9	FRY_HUMAN	Protein furry homolog OS Homo sapiens GN FRY PE 1 SV 1	Regular	30.3435	43.95	342297	24	15	217	1.1	77335	6533	19229	1.4932	0.5111	Red
1062	O94989	ARHGF_HUMAN	Rho guanine nucleotide exchange factor 15 OS Homo sapiens GN ARHGEF15 PE 1 SV 4	Regular	30.2099	44.05	92909.6	14	8	59	1.43	37559	5517	15845	1.2609	0.1172	Red
11704	Q9P2S2	NRX2A_HUMAN	Neurexin 2 alpha OS Homo sapiens GN NRXN2 PE 2 SV 1	Regular	30.1462	44.06	187092	23	10	113	2.8	157251	5957	27388	1.3615	0.2547	Red
9684	Q96Q04	LMTK3_HUMAN	Serine threonine protein kinase LMTK3 OS Homo sapiens GN LMTK3 PE 2 SV 2	Regular	30.1186	44.07	154687	19	11	82	2.53	67737	30414	19508	6.9513	1.0753	Red
4967	O75417	DPOLQ_HUMAN	DNA polymerase theta OS Homo sapiens GN POLQ PE 1 SV 2	Regular	30.0749	44.13	292471	18	16	214	1.78	61094	12988	18333	2.9685	0.8682	Red
5401	Q7Z589	EMSY_HUMAN	Protein EMSY OS Homo sapiens GN EMSY PE 1 SV 2	Regular	30.028	44.14	141867	19	9	84	3.1	40848	20079	15997	4.5892	0.6511	Red
8738	Q5HYC2	K2026_HUMAN	Uncharacterized protein KIAA2026 OS Homo sapiens GN KIAA2026 PE 2 SV 2	Regular	30.0011	44.12	230084	26	12	144	1.38	63835	7665	19733	1.7519	0.4031	Red
3595	A6NMZ7	CO6A6_HUMAN	Collagen alpha 6 VI chain OS Homo sapiens GN COL6A6 PE 1 SV 2	Regular	29.988	44.09	248828	20	16	179	2.7	47951	6675	22453	1.5256	0.3796	Red
19045	Q9BYP7	WNK3_HUMAN	Serine threonine protein kinase WNK3 OS Homo sapiens GN WNK3 PE 1 SV 3	Regular	29.9498	44.07	200298	21	11	120	1.56	42118	17905.5	16633	4.0924	0.8197	Red
10291	Q14676	MDC1_HUMAN	Mediator of DNA damage checkpoint protein 1 OS Homo sapiens GN MDC1 PE 1 SV 3	Regular	29.9449	44.04	227807	19	12	143	3.83	65904	28567	17978	6.5292	1.4874	Red
6146	Q5XX13	FBW10_HUMAN	F box WD repeat containing protein 10 OS Homo sapiens GN FBXW10 PE 2 SV 2	Regular	29.7177	44.05	121271	8	5	92	1.05	52998	5589	7615	1.2774	0.1549	Red
18676	O75445	USH2A_HUMAN	Usherin OS Homo sapiens GN USH2A PE 1 SV 3	Regular	29.699	44.03	586664	38	20	290	1.21	188929	45264	60004	10.3454	6.0693	Red
16994	O95359	TACC2_HUMAN	Transforming acidic coiled coil containing protein 2 OS Homo sapiens GN TACC2 PE 1 SV 3	Regular	29.6881	44	311823	25	16	229	2.85	134643	72307	30386	16.5263	5.1533	Red
14570	Q6ZUM4	RHG27_HUMAN	Rho GTPase activating protein 27 OS Homo sapiens GN ARHGAP27 PE 1 SV 3	Regular	29.6244	44.01	99080.4	9	5	55	3.94	20515	7468	6141	1.7069	0.1691	Red
4987	Q14195	DPYL3_HUMAN	Dihydropyrimidinase related protein 3 OS Homo sapiens GN DPYSL3 PE 1 SV 1	Regular	29.521	44.11	62362.6	5	3	39	3.16	14182	5094	2466	1.1643	0.0726	Red
16480	Q9C0H9	SRCN1_HUMAN	SRC kinase signaling inhibitor 1 OS Homo sapiens GN SRCIN1 PE 1 SV 3	Regular	29.4783	44.08	112739	15	7	96	2.84	36797	24992	7708	5.7121	0.644	Red
6121	Q8TDW7	FAT3_HUMAN	Protocadherin Fat 3 OS Homo sapiens GN FAT3 PE 2 SV 2	Regular	29.4688	44.06	509002	42	27	293	2.07	70879	12410	39294	2.8364	1.4437	Red
12727	Q96QU1	PCD15_HUMAN	Protocadherin 15 OS Homo sapiens GN PCDH15 PE 1 SV 2	Regular	29.3661	44.13	217438	22	12	121	2.3	63545	25685	29112	5.8705	1.2765	Red
312	P12821	ACE_HUMAN	Angiotensin converting enzyme OS Homo sapiens GN ACE PE 1 SV 1	Regular	29.3087	44.1	150513	10	4	88	2.3	12234	12352.5	4233	2.8233	0.4249	Red
4053	Q8WXD9	CSKI1_HUMAN	Caskin 1 OS Homo sapiens GN CASKIN1 PE 1 SV 1	Regular	29.2891	44.08	150384	13	9	105	2.38	35434	11560	12184	2.6421	0.3973	Red
1349	P20648	ATP4A_HUMAN	Potassium transporting ATPase alpha chain 1 OS Homo sapiens GN ATP4A PE 2 SV 5	Regular	29.252	44.08	115830	4	3	70	0.87	14614	7560	3509	1.7279	0.2001	Red
8785	Q7Z3B3	KANL1_HUMAN	KAT8 regulatory NSL complex subunit 1 OS Homo sapiens GN KANSL1 PE 1 SV 2	Regular	29.1745	44.06	121823	12	10	78	5.79	97302	39857	9747	9.1096	1.1098	Red
9438	Q4G0J3	LARP7_HUMAN	La related protein 7 OS Homo sapiens GN LARP7 PE 1 SV 1	Regular	29.1718	44.04	67183.9	6	4	72	4.12	6251	3342	2812	0.7638	0.0513	Red
7847	Q9BVR0	HRC23_HUMAN	Putative HERC2 like protein 3 OS Homo sapiens GN HERC2P3 PE 5 SV 2	Regular	29.0828	44.1	130768	11	6	69	3.2	42176	2884.39	6345	0.6592	0.0862	Red	7647
18550	O95071	UBR5_HUMAN	E3 ubiquitin protein ligase UBR5 OS Homo sapiens GN UBR5 PE 1 SV 2	Regular	29.0165	44.11	312546	35	24	205	1.61	163845	8699	31788	1.9882	0.6214	Red
4839	Q5VZB9	DMRTA_HUMAN	Doublesex and mab 3 related transcription factor A1 OS Homo sapiens GN DMRTA1 PE 2 SV 1	Regular	28.9997	44.12	53923.1	4	3	39	2.58	6722	8256	4338	1.887	0.1018	Red
11848	Q969Y0	NXPE3_HUMAN	NXPE family member 3 OS Homo sapiens GN NXPE3 PE 2 SV 1	Regular	28.9933	44.12	64426.9	5	2	38	1.97	2339	4689	2949	1.0717	0.069	Red
19223	Q8N7P7	YH007_HUMAN	Uncharacterized protein FLJ40521 OS Homo sapiens PE 1 SV 1	Regular	28.9813	44.1	49055.5	4	3	42	3.98	11376	10698	3745	2.4451	0.1199	Red
11415	Q5SYE7	NHSL1_HUMAN	NHS like protein 1 OS Homo sapiens GN NHSL1 PE 1 SV 2	Regular	28.9507	44.08	172208	5	4	93	2.86	14457	8248.5	4354	1.8853	0.3247	Red
5118	Q8TD57	DYH3_HUMAN	Dynein heavy chain 3 axonemal OS Homo sapiens GN DNAH3 PE 2 SV 1	Regular	28.9388	44.05	474080	45	22	343	1.46	181979	13208.7	28871	3.0189	1.4312	Red	618 5116 5114
19512	Q6PJT7	ZC3HE_HUMAN	Zinc finger CCCH domain containing protein 14 OS Homo sapiens GN ZC3H14 PE 1 SV 1	Regular	28.9097	44.06	83845.3	15	8	53	3.13	60631	17551.5	13711	4.0115	0.3363	Red
14621	Q86UR5	RIMS1_HUMAN	Regulating synaptic membrane exocytosis protein 1 OS Homo sapiens GN RIMS1 PE 1 SV 1	Regular	28.8765	44.03	190270	15	8	128	1.06	41964	20469	23794	4.6783	0.8901	Red
8699	Q9BY89	K1671_HUMAN	Uncharacterized protein KIAA1671 OS Homo sapiens GN KIAA1671 PE 1 SV 2	Regular	28.7773	44.07	197738	18	16	165	2.21	134136	8943	17089	2.044	0.4042	Red
18549	Q5T4S7	UBR4_HUMAN	E3 ubiquitin protein ligase UBR4 OS Homo sapiens GN UBR4 PE 1 SV 1	Regular	28.6951	44.08	580913	38	23	368	1.1	71518	7945	37306	1.8159	1.0549	Red	20459
18631	Q70J99	UN13D_HUMAN	Protein unc 13 homolog D OS Homo sapiens GN UNC13D PE 1 SV 1	Regular	28.6561	44.05	124366	4	4	80	3.3	9435	8458	4772	1.9331	0.2404	Red
9587	P42702	LIFR_HUMAN	Leukemia inhibitory factor receptor OS Homo sapiens GN LIFR PE 1 SV 1	Regular	28.6226	44.09	125169	12	8	80	3.65	20560	6357	9962	1.4529	0.1819	Red
3512	A5YKK6	CNOT1_HUMAN	CCR4 NOT transcription complex subunit 1 OS Homo sapiens GN CNOT1 PE 1 SV 2	Regular	28.4945	44.1	269278	23	14	185	1.14	144494	12739	16604	2.9116	0.784	Red
11131	Q8NEY1	NAV1_HUMAN	Neuron navigator 1 OS Homo sapiens GN NAV1 PE 1 SV 2	Regular	28.4746	44.13	203213	23	16	149	1.6	47838	7296	18429	1.6676	0.3389	Red	11132
13203	Q9NTG1	PKDRE_HUMAN	Polycystic kidney disease and receptor for egg jelly related protein OS Homo sapiens GN PKDREJ PE 2	Regular	28.4413	44.14	258073	21	12	149	1.38	39299	3318	14870	0.7584	0.1957	Red
3013	Q9P2D1	CHD7_HUMAN	Chromodomain helicase DNA binding protein 7 OS Homo sapiens GN CHD7 PE 1 SV 3	Regular	28.4234	44.14	337753	29	16	215	1.3	70656	18158	36162	4.1501	1.4017	Yellow	3014
19754	Q5VUA4	ZN318_HUMAN	Zinc finger protein 318 OS Homo sapiens GN ZNF318 PE 1 SV 2	Regular	28.4091	44.12	252766	21	11	182	0.88	220749	48619.5	20777	11.1123	2.8088	Red
8584	Q14573	ITPR3_HUMAN	Inositol 1 4 5 trisphosphate receptor type 3 OS Homo sapiens GN ITPR3 PE 1 SV 2	Regular	28.353	44.1	307016	21	13	202	3.41	34913	13409	13992	3.0647	0.9409	Red
13144	Q969N2	PIGT_HUMAN	GPI transamidase component PIG T OS Homo sapiens GN PIGT PE 1 SV 1	Regular	28.3523	44.07	66270	8	4	45	1.21	64792	5061	5701	1.1567	0.0767	Red
19935	Q9ULD9	ZN608_HUMAN	Zinc finger protein 608 OS Homo sapiens GN ZNF608 PE 1 SV 4	Regular	28.283	44.08	163235	14	9	114	1.26	24273	9768	11948	2.2325	0.3644	Red
9741	Q8ND23	LR16B_HUMAN	Leucine rich repeat containing protein 16B OS Homo sapiens GN LRRC16B PE 2 SV 2	Regular	28.0351	44.23	151827	16	9	99	1.9	39828	7869	15431	1.7985	0.2731	Red
8583	Q14571	ITPR2_HUMAN	Inositol 1 4 5 trisphosphate receptor type 2 OS Homo sapiens GN ITPR2 PE 1 SV 2	Regular	27.9862	44.21	311258	23	14	217	2.3	45795	11920	24940	2.7244	0.848	Red	8582
16218	Q9Y4B5	SOGA2_HUMAN	Protein SOGA2 OS Homo sapiens GN SOGA2 PE 1 SV 5	Regular	27.8966	44.22	210781	27	17	170	4.78	78532	21516	28101	4.9176	1.0365	Red
9407	P24043	LAMA2_HUMAN	Laminin subunit alpha 2 OS Homo sapiens GN LAMA2 PE 1 SV 4	Regular	27.8756	44.22	353201	28	14	243	1.79	69831	8213	20459	1.8771	0.663	Red
2010	O95180	CAC1H_HUMAN	Voltage dependent T type calcium channel subunit alpha 1H OS Homo sapiens GN CACNA1H PE 1 SV 4	Regular	27.8454	44.2	262357	15	5	138	1.91	37593	26890	10872	6.1459	1.6124	Red
606	Q9UKA4	AKA11_HUMAN	A kinase anchor protein 11 OS Homo sapiens GN AKAP11 PE 1 SV 1	Regular	27.8334	44.18	213079	14	8	122	1.63	25551	6156	9536	1.407	0.2998	Red
8256	Q14005	IL16_HUMAN	Pro interleukin 16 OS Homo sapiens GN IL16 PE 1 SV 4	Regular	27.6974	44.3	143064	9	6	110	3.83	18236	11867	7767	2.7123	0.388	Red
1649	Q9NR09	BIRC6_HUMAN	Baculoviral IAP repeat containing protein 6 OS Homo sapiens GN BIRC6 PE 1 SV 2	Regular	27.6962	44.28	536529	49	28	290	1.96	96382	14150	40528	3.2341	1.7352	Red
14199	Q14644	RASA3_HUMAN	Ras GTPase activating protein 3 OS Homo sapiens GN RASA3 PE 1 SV 3	Regular	27.6809	44.25	96896.5	14	10	70	2.76	74939	16059	24671	3.6704	0.3556	Red
911	O00203	AP3B1_HUMAN	AP 3 complex subunit beta 1 OS Homo sapiens GN AP3B1 PE 1 SV 3	Regular	27.5696	44.23	121891	20	9	95	1.65	46453	8659.5	18076	1.9792	0.2412	Red	912
8649	Q9Y4F5	K0284_HUMAN	Protein KIAA0284 OS Homo sapiens GN KIAA0284 PE 1 SV 4	Regular	27.5269	44.24	172259	18	12	140	4.47	30636	15446	17675	3.5303	0.6081	Red
5656	Q8NEV8	EXPH5_HUMAN	Exophilin 5 OS Homo sapiens GN EXPH5 PE 1 SV 3	Regular	27.4377	44.21	223888	25	17	175	3.52	150098	22321	25440	5.1016	1.1422	Red
692	Q86TB3	ALPK2_HUMAN	Alpha protein kinase 2 OS Homo sapiens GN ALPK2 PE 1 SV 3	Regular	27.4162	44.28	240035	16	12	171	1.34	45261	9072	17776	2.0735	0.4977	Red
5707	Q9NX05	F120C_HUMAN	Constitutive coactivator of PPAR gamma like protein 2 OS Homo sapiens GN FAM120C PE 2 SV 3	Regular	27.3957	44.25	121729	11	8	68	4.2	45654	3576	9493	0.8173	0.0995	Red
2032	Q9H251	CAD23_HUMAN	Cadherin 23 OS Homo sapiens GN CDH23 PE 1 SV 1	Regular	27.387	44.23	370324	28	17	203	1.55	66653	27764	25901	6.3457	2.3499	Red
14500	Q99666	RGPD5_HUMAN	RANBP2 like and GRIP domain containing protein 5 6 OS Homo sapiens GN RGPD5 PE 1 SV 3	Regular	27.2559	44.24	200236	8	6	137	1.36	57370	0	5969			Yellow	14304 21898
12954	O60437	PEPL_HUMAN	Periplakin OS Homo sapiens GN PPL PE 1 SV 4	Regular	27.2218	44.24	205317	24	13	197	1.82	67400	10629	29104	2.4293	0.4988	Red
5120	Q9C0G6	DYH6_HUMAN	Dynein heavy chain 6 axonemal OS Homo sapiens GN DNAH6 PE 1 SV 3	Regular	26.9997	44.34	479975	42	28	314	2.07	100182	7614	43614	1.7402	0.8353	Red	17176
9870	P22888	LSHR_HUMAN	Lutropin choriogonadotropic hormone receptor OS Homo sapiens GN LHCGR PE 1 SV 4	Regular	26.3447	44.63	80068.8	6	7	47	4.72	24235	9763.5	6316	2.2315	0.1787	Red
18823	Q7Z7G8	VP13B_HUMAN	Vacuolar protein sorting associated protein 13B OS Homo sapiens GN VPS13B PE 1 SV 2	Regular	26.2092	44.66	454596	26	15	262	1.69	71339	15338	24240	3.5056	1.5936	Red	10996 2128 15042
13682	Q92954	PRG4_HUMAN	Proteoglycan 4 OS Homo sapiens GN PRG4 PE 1 SV 2	Regular	26.155	44.67	152332	16	8	229	0.57	209989	423858	84863	96.8757	14.7573	Red
20220	Q9HCJ5	ZSWM6_HUMAN	Zinc finger SWIM domain containing protein 6 OS Homo sapiens GN ZSWIM6 PE 2 SV 2	Regular	26.1115	44.64	135181	16	7	70	1.07	51113	8139	10972	1.8602	0.2515	Red
5062	Q9NRD8	DUOX2_HUMAN	Dual oxidase 2 OS Homo sapiens GN DUOX2 PE 1 SV 2	Regular	25.9104	44.71	176790	16	10	121	0.45	58001	9114	11409	2.0831	0.3683	Red	5061
2390	A6NC98	CC88B_HUMAN	Coiled coil domain containing protein 88B OS Homo sapiens GN CCDC88B PE 1 SV 1	Regular	25.8971	44.68	165266	15	13	154	2.44	40091	9726	14355	2.2229	0.3674	Red
15741	Q7Z333	SETX_HUMAN	Probable helicase senataxin OS Homo sapiens GN SETX PE 1 SV 4	Regular	25.8131	44.74	307214	31	20	234	1.79	162534	11530	48538	2.6353	0.8096	Red
217	Q8WWZ7	ABCA5_HUMAN	ATP binding cassette sub family A member 5 OS Homo sapiens GN ABCA5 PE 2 SV 2	Regular	25.806	44.72	187991	15	11	96	0.61	65729	5292	41966	1.2095	0.2274	Red
18848	Q13488	VPP3_HUMAN	V type proton ATPase 116 kDa subunit a isoform 3 OS Homo sapiens GN TCIRG1 PE 1 SV 3	Regular	25.756	44.73	93709.6	6	5	52	3.25	22963	10984.5	3702	2.5106	0.2353	Red
18938	Q9BZH6	WDR11_HUMAN	WD repeat containing protein 11 OS Homo sapiens GN WDR11 PE 1 SV 1	Regular	25.537	44.85	138510	9	5	91	0.82	16697	10797	4918	2.4677	0.3418	Red
18141	Q9H1D0	TRPV6_HUMAN	Transient receptor potential cation channel subfamily V member 6 OS Homo sapiens GN TRPV6 PE 1 SV 2	Regular	25.5138	44.82	84065.6	6	4	47	2.62	18950	12928.5	10174	2.9549	0.2484	Red
9994	Q99698	LYST_HUMAN	Lysosomal trafficking regulator OS Homo sapiens GN LYST PE 1 SV 3	Regular	25.4731	44.8	434443	21	17	273	1.92	105026	30804	22935	7.0405	3.0587	Red
6505	Q5SYB0	FRPD1_HUMAN	FERM and PDZ domain containing protein 1 OS Homo sapiens GN FRMPD1 PE 1 SV 1	Regular	25.4635	44.78	175832	11	5	129	0.7	11385	7884	5188	1.8019	0.3168	Red
5122	Q96JB1	DYH8_HUMAN	Dynein heavy chain 8 axonemal OS Homo sapiens GN DNAH8 PE 1 SV 2	Regular	28.2199	44.78	518315	53	33	367	0.85	190528	26280	36587	6.0065	3.1132	Red	5125 5112 5123 5111 5119
12546	O00459	P85B_HUMAN	Phosphatidylinositol 3 kinase regulatory subunit beta OS Homo sapiens GN PIK3R2 PE 1 SV 2	Regular	25.3858	44.79	81887.5	9	5	69	1.79	25577	8205	5417	1.8753	0.1536	Red
10471	Q86YT6	MIB1_HUMAN	E3 ubiquitin protein ligase MIB1 OS Homo sapiens GN MIB1 PE 1 SV 1	Regular	25.3815	44.76	112531	11	6	75	0.99	21213	6474	7731	1.4797	0.1665	Red
13591	Q5THK1	PR14L_HUMAN	Protein PRR14L OS Homo sapiens GN PRR14L PE 1 SV 1	Regular	25.3115	44.8	241292	27	15	215	2.79	121853	36950	30115	8.4452	2.0378	Red	39234 5125 26594 18092 8660 31963 1302 968 31173 38504 16651 17431
10863	Q86WG5	MTMRD_HUMAN	Myotubularin related protein 13 OS Homo sapiens GN SBF2 PE 1 SV 1	Regular	25.1505	44.91	210518	20	12	121	2.27	41533	12491	13193	2.8549	0.601	Red	20997
12545	P27986	P85A_HUMAN	Phosphatidylinositol 3 kinase regulatory subunit alpha OS Homo sapiens GN PIK3R1 PE 1 SV 2	Regular	25.0869	44.89	83940.7	12	5	69	3.87	90724	78087	15561	17.8473	1.4981	Red	12533
11132	Q8IVL1	NAV2_HUMAN	Neuron navigator 2 OS Homo sapiens GN NAV2 PE 1 SV 3	Regular	24.9519	44.92	269479	23	14	173	2.93	70430	18036	14528	4.1223	1.1109	Red	11131
13291	Q13393	PLD1_HUMAN	Phospholipase D1 OS Homo sapiens GN PLD1 PE 1 SV 1	Regular	24.9073	44.96	124869	10	6	91	3.35	49600	9310.5	7834	2.128	0.2657	Red
7094	A7E2F4	GOG8A_HUMAN	Golgin subfamily A member 8A OS Homo sapiens GN GOLGA8A PE 1 SV 3	Regular	24.7914	45.07	70858.6	9	4	57	2.54	34247	12031.5	5136	2.7499	0.1949	Red
2024	P55290	CAD13_HUMAN	Cadherin 13 OS Homo sapiens GN CDH13 PE 1 SV 1	Regular	24.7912	45.05	78743.2	5	4	44	5.89	4051	2956.5	4591	0.6757	0.0532	Red
18297	A6PVC2	TTLL8_HUMAN	Protein monoglycylase TTLL8 OS Homo sapiens GN TTLL8 PE 1 SV 4	Regular	24.7819	45.03	96158.9	18	8	71	1.65	62804	32730	21459	7.4807	0.7193	Red
3095	Q5VXU9	CI084_HUMAN	Uncharacterized protein C9orf84 OS Homo sapiens GN C9orf84 PE 2 SV 1	Regular	24.7636	45	167312	12	5	127	0.83	16136	13500	9684	3.0855	0.5162	Red
8457	Q5JU85	IQEC2_HUMAN	IQ motif and SEC7 domain containing protein 2 OS Homo sapiens GN IQSEC2 PE 1 SV 1	Regular	24.7195	45.04	162649	10	7	212	2.03	67083	46290	10394	10.5799	1.7208	Red
14169	Q7Z5J4	RAI1_HUMAN	Retinoic acid induced protein 1 OS Homo sapiens GN RAI1 PE 1 SV 2	Regular	24.6634	45.04	206318	21	10	124	1.52	65030	11856	20051	2.7098	0.5591	Red
9008	P43630	KI3L2_HUMAN	Killer cell immunoglobulin like receptor 3DL2 OS Homo sapiens GN KIR3DL2 PE 2 SV 1	Regular	24.5859	45.1	50914.7	5	2	27	4.18	5898	7185	3985	1.6422	0.0836	Red
18643	Q9P2D8	UNC79_HUMAN	Protein unc 79 homolog OS Homo sapiens GN UNC79 PE 2 SV 3	Regular	24.4713	45.16	299875	19	13	182	1.44	87116	19570.5	16416	4.473	1.3413	Yellow
172	P05067	A4_HUMAN	Amyloid beta A4 protein OS Homo sapiens GN APP PE 1 SV 3	Regular	24.2761	45.17	87969.9	3	3	50	3.12	10709	14388	3606	3.2885	0.2893	Red
10187	O15021	MAST4_HUMAN	Microtubule associated serine threonine protein kinase 4 OS Homo sapiens GN MAST4 PE 1 SV 3	Regular	24.257	45.17	286602	11	8	202	2.4	22509	11264	9194	2.5745	0.7378	Red
3168	Q711Q0	CJ071_HUMAN	Uncharacterized protein C10orf71 OS Homo sapiens GN C10orf71 PE 2 SV 2	Regular	24.2337	45.18	157845	14	8	119	1.32	22940	5805	12232	1.3268	0.2094	Red
14857	O94941	RNF37_HUMAN	RING finger protein 37 OS Homo sapiens GN UBOX5 PE 2 SV 1	Regular	24.2178	45.15	60106.3	2	3	36	6.65	534653	38685	3292	8.8417	0.5314	Red
19579	Q86UP3	ZFHX4_HUMAN	Zinc finger homeobox protein 4 OS Homo sapiens GN ZFHX4 PE 1 SV 1	Regular	24.1658	45.19	398407	38	18	254	1.77	79893	5205.29	37679	1.1897	0.474	Red	19578
17285	Q6N021	TET2_HUMAN	Methylcytosine dioxygenase TET2 OS Homo sapiens GN TET2 PE 1 SV 3	Regular	24.0683	45.19	226378	13	8	146	0.75	84757	25752	18328	5.8858	1.3324	Red
11299	P46934	NEDD4_HUMAN	E3 ubiquitin protein ligase NEDD4 OS Homo sapiens GN NEDD4 PE 1 SV 4	Regular	23.9823	45.25	150369	6	3	94	1.21	8596	9574.5	4100	2.1883	0.3291	Red
3593	P12111	CO6A3_HUMAN	Collagen alpha 3 VI chain OS Homo sapiens GN COL6A3 PE 1 SV 5	Regular	23.9289	45.28	345381	27	22	237	2.61	115437	44919	32502	10.2666	3.5459	Red
18644	Q8N2C7	UNC80_HUMAN	Protein unc 80 homolog OS Homo sapiens GN UNC80 PE 2 SV 2	Regular	23.8754	45.26	367383	24	15	226	1.63	44854	8256	23911	1.887	0.6932	Red
5520	O15083	ERC2_HUMAN	ERC protein 2 OS Homo sapiens GN ERC2 PE 1 SV 3	Regular	23.8124	45.29	110729	14	6	119	2.19	30235	12402	9744	2.8346	0.3139	Red	14241
3495	Q14028	CNGB1_HUMAN	Cyclic nucleotide gated cation channel beta 1 OS Homo sapiens GN CNGB1 PE 1 SV 2	Regular	23.8024	45.27	140590	15	8	98	3.76	33910	9237	12939	2.1112	0.2968	Red
10406	P08581	MET_HUMAN	Hepatocyte growth factor receptor OS Homo sapiens GN MET PE 1 SV 4	Regular	23.781	45.3	157880	6	5	96	2.09	12695	6793	4857	1.5526	0.2451	Red
558	Q9HCK5	AGO4_HUMAN	Protein argonaute 4 OS Homo sapiens GN EIF2C4 PE 1 SV 2	Regular	23.77	45.28	98237.6	14	8	64	2.32	12741	4941.78	13775	1.1295	0.111	Red	555
7295	Q9C091	GRB1L_HUMAN	GREB1 like protein OS Homo sapiens GN GREB1L PE 2 SV 2	Regular	23.7254	45.28	216636	19	13	126	3.38	72561	16032	40987	3.6642	0.7938	Red
6535	Q68CZ1	FTM_HUMAN	Protein fantom OS Homo sapiens GN RPGRIP1L PE 1 SV 2	Regular	23.7199	45.26	152057	15	8	101	1.52	101005	37662	9626	8.6079	1.3089	Red
9846	Q6ZRR7	LRRC9_HUMAN	Leucine rich repeat containing protein 9 OS Homo sapiens GN LRRC9 PE 2 SV 2	Regular	23.6652	45.26	168907	18	12	111	2.55	60035	12920	22279	2.953	0.4988	Red
14051	Q9H0J4	QRIC2_HUMAN	Glutamine rich protein 2 OS Homo sapiens GN QRICH2 PE 2 SV 1	Regular	23.5422	45.24	181340	15	12	114	4.27	35461	11351	16098	2.5944	0.4705	Red
8582	Q14643	ITPR1_HUMAN	Inositol 1 4 5 trisphosphate receptor type 1 OS Homo sapiens GN ITPR1 PE 1 SV 2	Regular	23.5406	45.22	317367	22	17	238	1.89	95282	38794	19031	8.8666	2.814	Red	8583
2256	Q8NEM8	CBPC3_HUMAN	Cytosolic carboxypeptidase 3 OS Homo sapiens GN AGBL3 PE 2 SV 2	Regular	23.3521	45.28	117209	11	6	91	0.9	55322	2979	11147	0.6809	0.0798	Red
13922	Q12923	PTN13_HUMAN	Tyrosine protein phosphatase non receptor type 13 OS Homo sapiens GN PTPN13 PE 1 SV 2	Regular	23.1615	45.36	279016	21	13	192	2.21	70787	8850	17621	2.0227	0.5644	Red
4755	Q9BTC0	DIDO1_HUMAN	Death inducer obliterator 1 OS Homo sapiens GN DIDO1 PE 1 SV 5	Regular	23.1186	45.34	245584	28	12	192	0.94	167988	4927.5	26128	1.1262	0.2766	Red
16088	Q92922	SMRC1_HUMAN	SWI SNF complex subunit SMARCC1 OS Homo sapiens GN SMARCC1 PE 1 SV 3	Regular	22.9941	45.37	123381	11	5	93	2.9	32582	6659.54	6161	1.5221	0.1878	Red	16089
1269	P16615	AT2A2_HUMAN	Sarcoplasmic endoplasmic reticulum calcium ATPase 2 OS Homo sapiens GN ATP2A2 PE 1 SV 1	Regular	22.945	45.38	116411	7	9	73	2.11	28342	2338.02	21412	0.5344	0.0622	Red	1270 1268
16796	Q5VT97	SYDE2_HUMAN	Rho GTPase activating protein SYDE2 OS Homo sapiens GN SYDE2 PE 1 SV 2	Regular	22.8079	45.41	134827	11	6	113	1.09	39037	11129.2	9773	2.5437	0.343	Green	7516 15723 8408 26265 25346 7599
13644	P48634	PRC2A_HUMAN	Protein PRRC2A OS Homo sapiens GN PRRC2A PE 1 SV 3	Regular	22.7862	45.38	229320	25	11	161	2.18	59359	10032	20266	2.2929	0.5258	Red	13646
3437	Q8N3K9	CMYA5_HUMAN	Cardiomyopathy associated protein 5 OS Homo sapiens GN CMYA5 PE 1 SV 3	Regular	22.7102	45.44	451036	28	16	347	0.76	112621	13662	57588	3.1225	1.4084	Red
13073	Q8WWQ0	PHIP_HUMAN	PH interacting protein OS Homo sapiens GN PHIP PE 1 SV 2	Regular	22.6876	45.42	208457	10	8	136	1.26	28985	8775	7473	2.0056	0.4181	Red
5112	Q96DT5	DYH11_HUMAN	Dynein heavy chain 11 axonemal OS Homo sapiens GN DNAH11 PE 1 SV 3	Regular	22.6455	45.45	525207	51	26	354	1.9	76403	12888	40953	2.9456	1.5471	Red	5122 5123 5111 5115
17811	Q9UKE5	TNIK_HUMAN	TRAF2 and NCK interacting protein kinase OS Homo sapiens GN TNIK PE 1 SV 1	Regular	22.6254	45.43	155457	16	8	112	1.32	134125	92834.9	14694	21.2181	3.2985	Red	10498
8800	Q92794	KAT6A_HUMAN	Histone acetyltransferase KAT6A OS Homo sapiens GN KAT6A PE 1 SV 2	Regular	22.5944	45.43	227708	18	12	145	1.8	32746	4458	12204	1.0189	0.232	Red
2062	Q9Y2D0	CAH5B_HUMAN	Carbonic anhydrase 5B mitochondrial OS Homo sapiens GN CA5B PE 1 SV 1	Regular	22.4098	45.49	36775.9	4	3	22	2.84	8912	6708	4772	1.5332	0.0564	Red
4962	P09884	DPOLA_HUMAN	DNA polymerase alpha catalytic subunit OS Homo sapiens GN POLA1 PE 1 SV 2	Regular	22.2451	45.52	167681	12	8	116	0.62	42172	9114	6543	2.0831	0.3493	Red
15686	Q96HI0	SENP5_HUMAN	Sentrin specific protease 5 OS Homo sapiens GN SENP5 PE 1 SV 3	Regular	22.2356	45.52	88004.8	13	6	62	1.19	14136	15036	7420	3.4366	0.3024	Red
1639	Q5TH69	BIG3_HUMAN	Brefeldin A inhibited guanine nucleotide exchange protein 3 OS Homo sapiens GN ARFGEF3 PE 1 SV 3	Regular	22.1293	45.53	244017	13	9	158	1.42	33917	10698	13322	2.4451	0.5966	Red
6234	Q9BRP7	FDXA1_HUMAN	Ferredoxin fold anticodon binding domain containing protein 1 OS Homo sapiens GN FDXACB1 PE 2 SV 3	Regular	22.0162	45.56	71670.6	7	5	44	4.81	24291	29518.5	2505	6.7467	0.4835	Red
13568	P0C7U0	PPR28_HUMAN	Protein phosphatase 1 regulatory subunit 28 OS Homo sapiens GN ELFN1 PE 1 SV 1	Regular	21.965	45.54	89084	7	5	51	2.73	15421	4449	3177	1.0169	0.0906	Red
8556	P16144	ITB4_HUMAN	Integrin beta 4 OS Homo sapiens GN ITGB4 PE 1 SV 5	Regular	21.9311	45.57	205874	5	7	140	2.69	29489	23019	9983	5.2612	1.0831	Red
13228	Q7Z736	PKHH3_HUMAN	Pleckstrin homology domain containing family H member 3 OS Homo sapiens GN PLEKHH3 PE 1 SV 2	Regular	21.9096	45.55	86343.9	5	5	61	3.4	45096	16606.5	4052	3.7955	0.3277	Red
11517	Q13423	NNTM_HUMAN	NAD P transhydrogenase mitochondrial OS Homo sapiens GN NNT PE 1 SV 3	Regular	21.7238	45.58	114637	9	5	72	3.13	23126	18884	11636	4.3161	0.4948	Red
1768	Q9UPA5	BSN_HUMAN	Protein bassoon OS Homo sapiens GN BSN PE 1 SV 4	Regular	21.6675	45.55	418580	33	18	276	0.69	128001	30180	30407	6.8979	2.8873	Red	4905
413	O14672	ADA10_HUMAN	Disintegrin and metalloproteinase domain containing protein 10 OS Homo sapiens GN ADAM10 PE 1 SV 1	Regular	21.6593	45.56	86195.2	8	6	64	2.67	209996	71031	4363	16.2346	1.3993	Red
18899	A6NCI4	VWA3A_HUMAN	von Willebrand factor A domain containing protein 3A OS Homo sapiens GN VWA3A PE 2 SV 3	Regular	21.6492	45.54	135617	10	6	102	2.36	55222	6669	25186	1.5242	0.2067	Red
569	Q8N157	AHI1_HUMAN	Jouberin OS Homo sapiens GN AHI1 PE 1 SV 1	Regular	21.64	45.51	138256	11	8	104	2.34	62220	3180	22768	0.7268	0.1005	Red
10993	Q8N1T3	MYO1H_HUMAN	Unconventional myosin Ih OS Homo sapiens GN MYO1H PE 2 SV 2	Regular	21.6081	45.52	120120	9	5	80	1.55	17794	22044	7321	5.0383	0.6052	Red	10994
17681	Q7Z403	TMC6_HUMAN	Transmembrane channel like protein 6 OS Homo sapiens GN TMC6 PE 1 SV 2	Regular	21.4791	45.52	91414.1	6	4	46	3.35	12409	5518.5	7809	1.2613	0.1153	Red
7912	Q9P2D3	HTR5B_HUMAN	HEAT repeat containing protein 5B OS Homo sapiens GN HEATR5B PE 1 SV 2	Regular	21.4784	45.5	226983	21	11	146	3.24	61316	22989	16367	5.2543	1.1926	Red	7911
284	Q13085	ACACA_HUMAN	Acetyl CoA carboxylase 1 OS Homo sapiens GN ACACA PE 1 SV 2	Regular	21.0737	45.66	267265	14	12	180	1.96	57732	11913	14402	2.7228	0.7277	Red
9456	Q86UK5	LBN_HUMAN	Limbin OS Homo sapiens GN EVC2 PE 1 SV 1	Regular	21.0557	45.64	148918	7	5	107	0.69	41073	24228	4671	5.5375	0.8246	Red
1250	Q9P241	AT10D_HUMAN	Probable phospholipid transporting ATPase VD OS Homo sapiens GN ATP10D PE 2 SV 3	Regular	21.0497	45.62	162213	12	8	87	2.24	26525	12561	5754	2.8709	0.4657	Red	24356
5907	Q6ZUB1	F75E1_HUMAN	Protein FAM75E1 OS Homo sapiens GN FAM75E1 PE 2 SV 2	Regular	20.9674	45.65	158961	9	3	107	1.66	25457	10152	10217	2.3203	0.3688	Red
16959	Q9Y228	T3JAM_HUMAN	TRAF3 interacting JNK activating modulator OS Homo sapiens GN TRAF3IP3 PE 1 SV 2	Regular	20.9624	45.65	64367.7	4	5	75	3.09	39834	33598.5	5363	7.6792	0.4943	Red
18906	P04275	VWF_HUMAN	von Willebrand factor OS Homo sapiens GN VWF PE 1 SV 4	Regular	20.8379	45.76	322609	25	17	183	2.1	218906	167012	35531	38.1718	12.3146	Red
14575	A7KAX9	RHG32_HUMAN	Rho GTPase activating protein 32 OS Homo sapiens GN ARHGAP32 PE 1 SV 1	Regular	20.7553	45.76	232240	16	8	134	2.16	138170	39457.5	11234	9.0183	2.0944	Red
13464	Q6S5H5	POTEG_HUMAN	POTE ankyrin domain family member G OS Homo sapiens GN POTEG PE 2 SV 5	Regular	20.7351	45.74	58066	5	2	36	1.77	31918	47271	3215	10.8041	0.6274	Red
8674	Q2LD37	K1109_HUMAN	Uncharacterized protein KIAA1109 OS Homo sapiens GN KIAA1109 PE 1 SV 2	Regular	20.7231	45.72	559703	29	19	336	0.88	99033	7528	48450	1.7206	0.963	Red
16830	O43426	SYNJ1_HUMAN	Synaptojanin 1 OS Homo sapiens GN SYNJ1 PE 1 SV 2	Regular	20.6127	45.72	174244	17	11	111	2.73	90658	35986	58107	8.2249	1.4331	Red
12916	O15018	PDZD2_HUMAN	PDZ domain containing protein 2 OS Homo sapiens GN PDZD2 PE 1 SV 4	Regular	20.572	45.7	304151	16	12	216	0.67	47485	32734.5	11551	7.4817	2.2756	Red
9831	Q07954	LRP1_HUMAN	Prolow density lipoprotein receptor related protein 1 OS Homo sapiens GN LRP1 PE 1 SV 2	Regular	20.4475	45.78	523483	26	15	301	1.67	166225	16075	45039	3.6741	1.9233	Red
530	Q9UHB7	AFF4_HUMAN	AF4 FMR2 family member 4 OS Homo sapiens GN AFF4 PE 1 SV 1	Regular	20.3259	45.81	127859	11	5	105	2.84	87263	114483	22778	26.1659	3.3455	Red
13272	Q15147	PLCB4_HUMAN	1 phosphatidylinositol 4 5 bisphosphate phosphodiesterase beta 4 OS Homo sapiens GN PLCB4 PE 1 SV 3	Regular	20.3103	45.79	135604	18	9	115	2.72	34787	10014	21300	2.2888	0.3104	Red
11414	Q86UT5	NHRF4_HUMAN	Na H exchange regulatory cofactor NHE RF4 OS Homo sapiens GN PDZD3 PE 1 SV 2	Regular	20.2787	45.79	61830	6	4	40	2.45	10128	7761	3892	1.7738	0.1097	Red
18849	Q9HBG4	VPP4_HUMAN	V type proton ATPase 116 kDa subunit a isoform 4 OS Homo sapiens GN ATP6V0A4 PE 1 SV 2	Regular	20.2495	45.77	97298.5	10	5	50	1.19	20622	12594	7099	2.8784	0.2801	Red
13956	Q9UMZ3	PTPRQ_HUMAN	Phosphotidylinositol phosphatase PTPRQ OS Homo sapiens GN PTPRQ PE 1 SV 2	Regular	20.1296	45.88	262293	11	11	132	1.97	45195	25840	11399	5.9059	1.5491	Red
12466	Q6IE36	OVOS2_HUMAN	Ovostatin homolog 2 OS Homo sapiens GN OVOS2 PE 2 SV 2	Regular	20.092	45.85	162619	5	8	92	3.14	27329	15493	7339	3.541	0.5758	Red
8660	Q9Y4D8	K0614_HUMAN	Probable E3 ubiquitin protein ligase C12orf51 OS Homo sapiens GN C12orf51 PE 1 SV 5	Regular	20.0584	45.88	444990	20	15	277	1.75	57709	9918	19577	2.2668	1.0087	Red	35176 18847 13591 39058 8572
20085	Q5JPB2	ZN831_HUMAN	Zinc finger protein 831 OS Homo sapiens GN ZNF831 PE 2 SV 4	Regular	20.0185	45.86	179888	10	7	118	1.55	87018	14315	6063	3.2718	0.5886	Red
12806	Q9Y6V0	PCLO_HUMAN	Protein piccolo OS Homo sapiens GN PCLO PE 1 SV 4	Regular	20.012	45.84	555045	35	21	344	2.13	237224	18581	79952	4.2468	2.3572	Red
10643	Q7Z3U7	MON2_HUMAN	Protein MON2 homolog OS Homo sapiens GN MON2 PE 1 SV 2	Regular	19.9895	45.84	192597	14	5	124	1.16	104924	10180.5	8023	2.3268	0.4481	Red
7740	Q8NDA2	HMCN2_HUMAN	Hemicentin 2 OS Homo sapiens GN HMCN2 PE 2 SV 2	Regular	19.84	45.9	550079	34	18	319	1.9	96561	49243	35538	11.2548	6.191	Red
4907	Q96HP0	DOCK6_HUMAN	Dedicator of cytokinesis protein 6 OS Homo sapiens GN DOCK6 PE 1 SV 3	Regular	19.7656	45.88	231440	12	11	158	1.37	82208	13423.6	12845	3.0681	0.7101	Red	4908
4057	Q96PZ7	CSMD1_HUMAN	CUB and sushi domain containing protein 1 OS Homo sapiens GN CSMD1 PE 1 SV 2	Regular	19.7409	45.86	396968	22	12	182	1.49	68610	21554	15909	4.9263	1.9556	Red
1294	Q8TF62	AT8B4_HUMAN	Probable phospholipid transporting ATPase IM OS Homo sapiens GN ATP8B4 PE 2 SV 3	Regular	19.5939	45.93	137123	15	10	72	2.68	58385	3547.5	17043	0.8108	0.1112	Red
12967	Q6Y7W6	PERQ2_HUMAN	PERQ amino acid rich with GYF domain containing protein 2 OS Homo sapiens GN GIGYF2 PE 1 SV 1	Regular	19.4504	45.99	150412	12	7	97	3.54	35216	5185	5856	1.1851	0.1782	Red
15580	Q6R2W3	SCND3_HUMAN	SCAN domain containing protein 3 OS Homo sapiens GN SCAND3 PE 2 SV 1	Regular	19.4299	45.97	153548	12	8	117	2.42	27232	12767	6364	2.918	0.4481	Red
9769	Q1X8D7	LRC36_HUMAN	Leucine rich repeat containing protein 36 OS Homo sapiens GN LRRC36 PE 2 SV 2	Regular	19.271	46.02	84335.9	9	4	63	2.52	18997	6285	7581	1.4365	0.1211	Red
18532	Q13107	UBP4_HUMAN	Ubiquitin carboxyl terminal hydrolase 4 OS Homo sapiens GN USP4 PE 1 SV 3	Regular	19.2486	46	110048	9	5	78	1.35	31153	47715	6349	10.9056	1.2001	Red
14577	Q9NRY4	RHG35_HUMAN	Rho GTPase activating protein 35 OS Homo sapiens GN ARHGAP35 PE 1 SV 2	Regular	19.0359	46	173769	13	7	122	2.64	17807	6348	8781	1.4509	0.2521	Red
13216	P08F94	PKHD1_HUMAN	Fibrocystin OS Homo sapiens GN PKHD1 PE 1 SV 1	Regular	18.9955	45.98	452405	28	21	217	1.94	99263	15849	28925	3.6224	1.6388	Red
17263	Q6N022	TEN4_HUMAN	Teneurin 4 OS Homo sapiens GN ODZ4 PE 2 SV 2	Regular	18.9285	45.99	312576	20	18	164	1.63	93369	22978	22699	5.2518	1.6416	Red
5497	P58107	EPIPL_HUMAN	Epiplakin OS Homo sapiens GN EPPK1 PE 1 SV 2	Regular	18.9259	45.96	558017	31	13	438	1.67	144322	69215.9	26292	15.8198	8.8277	Red	13299
15982	Q14940	SL9A5_HUMAN	Sodium hydrogen exchanger 5 OS Homo sapiens GN SLC9A5 PE 1 SV 2	Regular	18.8641	45.97	99810	4	2	59	1.34	7414	14502	4150	3.3145	0.3308	Red
17502	Q9UKI8	TLK1_HUMAN	Serine threonine protein kinase tousled like 1 OS Homo sapiens GN TLK1 PE 1 SV 2	Regular	18.8007	46	87270	7	4	54	0.78	75936	38040	5857	8.6943	0.7588	Red
16625	Q9P2P6	STAR9_HUMAN	StAR related lipid transfer protein 9 OS Homo sapiens GN STARD9 PE 1 SV 3	Regular	18.7428	46	522161	28	20	377	1.47	90899	13342	22502	3.0494	1.5923	Red
9024	O60333	KIF1B_HUMAN	Kinesin like protein KIF1B OS Homo sapiens GN KIF1B PE 1 SV 5	Regular	18.7357	45.98	205902	24	13	154	0.94	76845	28606.5	18119	6.5382	1.3462	Red	5125
7651	Q8IVU3	HERC6_HUMAN	Probable E3 ubiquitin protein ligase HERC6 OS Homo sapiens GN HERC6 PE 2 SV 2	Regular	18.7281	45.96	116609	12	7	82	3.33	113746	48209	13648	11.0185	1.2849	Red
1993	Q8TDN4	CABL1_HUMAN	CDK5 and ABL1 enzyme substrate 1 OS Homo sapiens GN CABLES1 PE 1 SV 2	Regular	18.7201	45.94	68283.3	10	6	36	1.9	27918	5511	7086	1.2596	0.086	Red
8875	Q03721	KCNC4_HUMAN	Potassium voltage gated channel subfamily C member 4 OS Homo sapiens GN KCNC4 PE 1 SV 2	Regular	18.7181	45.92	70793.4	5	3	44	4.25	17851	17851	2437	4.08	0.2888	Red
17897	Q5GJ75	TP8L3_HUMAN	Tumor necrosis factor alpha induced protein 8 like protein 3 OS Homo sapiens GN TNFAIP8L3 PE 2 SV 1	Regular	18.6148	46.02	32887.6	1	1	23	3.77	1011	3033	2771	0.6932	0.0228	Red
15056	Q96T23	RSF1_HUMAN	Remodeling and spacing factor 1 OS Homo sapiens GN RSF1 PE 1 SV 2	Regular	18.5616	46	165360	22	11	131	1.73	52999	7888.5	14848	1.803	0.2981	Red
8702	Q9C0D2	K1731_HUMAN	Centrosomal protein KIAA1731 OS Homo sapiens GN KIAA1731 PE 2 SV 4	Regular	18.4959	45.98	296716	24	18	189	1.15	109012	6884	41652	1.5734	0.4668	Red
9607	Q6MZP7	LIN54_HUMAN	Protein lin 54 homolog OS Homo sapiens GN LIN54 PE 1 SV 3	Regular	18.4087	45.96	80863	3	2	42	1.6	12473	18519	4074	4.2326	0.3423	Red
5904	Q6ZQQ2	F75D1_HUMAN	Protein FAM75D1 OS Homo sapiens GN FAM75D1 PE 1 SV 1	Regular	18.2181	46.03	177272	10	5	113	0.82	12980	3003	4355	0.6864	0.1217	Red
20053	Q9ULD5	ZN777_HUMAN	Zinc finger protein 777 OS Homo sapiens GN ZNF777 PE 1 SV 2	Regular	18.1138	46.11	86260	5	3	54	1.58	15669	31302	3785	7.1543	0.6171	Red
18918	Q2M389	WASH7_HUMAN	WASH complex subunit 7 OS Homo sapiens GN KIAA1033 PE 1 SV 2	Regular	18.0469	46.14	137430	5	4	100	1.62	10455	7624.5	2041	1.7426	0.2395	Red
7324	Q9Y3R0	GRIP1_HUMAN	Glutamate receptor interacting protein 1 OS Homo sapiens GN GRIP1 PE 1 SV 3	Regular	18.0385	46.12	123278	8	5	80	1.95	9203	6841.5	6263	1.5637	0.1928	Red
13244	Q13835	PKP1_HUMAN	Plakophilin 1 OS Homo sapiens GN PKP1 PE 1 SV 2	Regular	18.0382	46.1	84172.4	5	3	58	1.47	14905	8544	8543	1.9528	0.1644	Red
11804	Q96RS6	NUDC1_HUMAN	NudC domain containing protein 1 OS Homo sapiens GN NUDCD1 PE 1 SV 2	Regular	18.0058	46.07	67554.3	1	2	51	2.57	4068	3210	2591	0.7337	0.0496	Red
6447	P85037	FOXK1_HUMAN	Forkhead box protein K1 OS Homo sapiens GN FOXK1 PE 1 SV 1	Regular	17.8142	46.08	75913.6	7	5	45	1.23	13642	14355	6824	3.2809	0.2491	Red
5371	O95834	EMAL2_HUMAN	Echinoderm microtubule associated protein like 2 OS Homo sapiens GN EML2 PE 2 SV 1	Regular	17.7556	46.06	71648.3	4	2	43	3.08	11008	17823	4211	4.0736	0.2919	Red
1273	Q16720	AT2B3_HUMAN	Plasma membrane calcium transporting ATPase 3 OS Homo sapiens GN ATP2B3 PE 1 SV 3	Regular	17.58	46.13	135338	15	6	88	0.98	64816	11244	9422	2.5699	0.3478	Red	1272
18525	Q70EL4	UBP43_HUMAN	Ubiquitin carboxyl terminal hydrolase 43 OS Homo sapiens GN USP43 PE 1 SV 2	Regular	17.5065	46.11	124121	14	10	79	3.29	78251	20475	12227	4.6797	0.5808	Red
10445	Q8IWI9	MGAP_HUMAN	MAX gene associated protein OS Homo sapiens GN MGA PE 1 SV 2	Regular	17.4861	46.09	333990	27	11	234	1.98	66726	10583	31561	2.4188	0.8079	Red
16764	Q4LDE5	SVEP1_HUMAN	Sushi von Willebrand factor type A EGF and pentraxin domain containing protein 1 OS Homo sapiens G	Regular	17.4812	46.07	404941	22	11	217	1.43	72562	30088	20434	6.8768	2.7847	Red
19127	Q8IZH2	XRN1_HUMAN	5 3 exoribonuclease 1 OS Homo sapiens GN XRN1 PE 1 SV 1	Regular	17.4197	46.07	195647	11	8	109	2.46	24387	7678	10333	1.7549	0.3433	Red
13890	Q9Y6C5	PTC2_HUMAN	Protein patched homolog 2 OS Homo sapiens GN PTCH2 PE 2 SV 2	Regular	17.3991	46.05	131970	4	6	60	1.16	16323	3789	6048	0.866	0.1143	Red
19722	Q9BRH9	ZN251_HUMAN	Zinc finger protein 251 OS Homo sapiens GN ZNF251 PE 2 SV 4	Regular	17.3474	46.03	77474.3	5	5	62	2.24	49253	26979	5345	6.1662	0.4777	Red
19969	Q8N720	ZN655_HUMAN	Zinc finger protein 655 OS Homo sapiens GN ZNF655 PE 1 SV 3	Regular	17.2638	46.01	58718.7	7	3	42	3.05	20123	19644	4712	4.4898	0.2636	Red
5045	Q9Y4J8	DTNA_HUMAN	Dystrobrevin alpha OS Homo sapiens GN DTNA PE 1 SV 2	Regular	17.2467	45.99	84699.6	8	5	59	0.94	24456	14904	5346	3.4064	0.2885	Red
12660	Q8TEW8	PAR3L_HUMAN	Partitioning defective 3 homolog B OS Homo sapiens GN PARD3B PE 1 SV 2	Regular	17.1934	45.97	133179	14	10	102	1.91	62918	15496.5	12939	3.5418	0.4717	Red
1197	Q8N3C0	ASCC3_HUMAN	Activating signal cointegrator 1 complex subunit 3 OS Homo sapiens GN ASCC3 PE 1 SV 3	Regular	16.8068	46.22	253058	32	19	171	1.23	199904	5960	28740	1.3622	0.3447	Red
16224	P18583	SON_HUMAN	Protein SON OS Homo sapiens GN SON PE 1 SV 4	Regular	16.8063	46.19	264230	19	11	123	1.11	53875	5043	14418	1.1526	0.3046	Red
1257	Q9H7F0	AT133_HUMAN	Probable cation transporting ATPase 13A3 OS Homo sapiens GN ATP13A3 PE 1 SV 4	Regular	16.7287	46.2	139868	11	9	68	2.53	37443	4903.5	7447	1.1207	0.1568	Red
16033	Q8IY92	SLX4_HUMAN	Structure specific endonuclease subunit SLX4 OS Homo sapiens GN SLX4 PE 1 SV 3	Regular	16.717	46.18	201837	8	3	126	2.13	5945	5945	5244	1.3588	0.2743	Red
8055	Q8IU81	I2BP1_HUMAN	Interferon regulatory factor 2 binding protein 1 OS Homo sapiens GN IRF2BP1 PE 1 SV 1	Regular	16.5584	46.18	62600.4	8	3	51	1.2	14358	34536	2580	7.8934	0.4941	Red
17869	Q96HA7	TONSL_HUMAN	Tonsoku like protein OS Homo sapiens GN TONSL PE 1 SV 2	Regular	16.4825	46.18	153096	10	6	97	0.8	17931	9387	6129	2.1455	0.3285	Red
959	Q06481	APLP2_HUMAN	Amyloid like protein 2 OS Homo sapiens GN APLP2 PE 1 SV 2	Regular	16.3383	46.19	87982.5	7	6	60	1.05	33497	3465	12235	0.792	0.0697	Red
12705	Q86U86	PB1_HUMAN	Protein polybromo 1 OS Homo sapiens GN PBRM1 PE 1 SV 1	Regular	16.2732	46.17	194203	14	8	138	1.78	63703	7903	10313	1.8063	0.3508	Red
2811	Q9HCU4	CELR2_HUMAN	Cadherin EGF LAG seven pass G type receptor 2 OS Homo sapiens GN CELSR2 PE 2 SV 1	Regular	16.1975	46.19	322414	14	9	181	1.51	57021	9032	14536	2.0643	0.6656	Red
4804	Q9P1A6	DLGP2_HUMAN	Disks large associated protein 2 OS Homo sapiens GN DLGAP2 PE 1 SV 4	Regular	16.1113	46.2	118989	10	5	70	3.7	22413	6577	5390	1.5032	0.1789	Red
19076	Q6AWC2	WWC2_HUMAN	Protein WWC2 OS Homo sapiens GN WWC2 PE 1 SV 2	Regular	16.0919	46.18	134918	8	5	98	1.34	14904	10207.5	7462	2.333	0.3148	Red
19561	O60315	ZEB2_HUMAN	Zinc finger E box binding homeobox 2 OS Homo sapiens GN ZEB2 PE 1 SV 1	Regular	15.9838	46.16	137930	6	4	96	2.31	27855	32755.5	4284	7.4865	1.0326	Red
18804	P98155	VLDLR_HUMAN	Very low density lipoprotein receptor OS Homo sapiens GN VLDLR PE 1 SV 1	Regular	15.9834	46.14	99919.4	6	3	70	1.49	16142	40584	4844	9.2758	0.9268	Red
13661	Q13029	PRDM2_HUMAN	PR domain zinc finger protein 2 OS Homo sapiens GN PRDM2 PE 1 SV 3	Regular	15.9053	46.14	191254	22	12	129	2.91	68703	8396	12097	1.919	0.367	Red
14911	Q8IWN7	RP1L1_HUMAN	Retinitis pigmentosa 1 like 1 protein OS Homo sapiens GN RP1L1 PE 1 SV 4	Regular	15.8222	46.14	263545	12	5	134	0.6	14510	22728	7415	5.1946	1.369	Red
7300	A4D2P6	GRD2I_HUMAN	Delphilin OS Homo sapiens GN GRID2IP PE 2 SV 2	Regular	15.8037	46.15	133360	7	3	79	1.9	32901	47020.5	8402	10.7469	1.4332	Red
9068	Q9H0B6	KLC2_HUMAN	Kinesin light chain 2 OS Homo sapiens GN KLC2 PE 1 SV 1	Regular	15.7467	46.15	69333.9	5	6	66	5.79	67494	33952	12539	7.76	0.538	Red	9067
6595	Q9Y2I7	FYV1_HUMAN	1 phosphatidylinositol 3 phosphate 5 kinase OS Homo sapiens GN PIKFYVE PE 1 SV 3	Regular	15.6816	46.13	239760	13	10	176	1.76	388005	38267	25510	8.7462	2.097	Red
769	Q9P2R3	ANFY1_HUMAN	Ankyrin repeat and FYVE domain containing protein 1 OS Homo sapiens GN ANKFY1 PE 1 SV 2	Regular	15.5999	46.11	129996	9	6	80	2.4	18588	10123.5	8642	2.3138	0.3008	Red
4968	O60673	DPOLZ_HUMAN	DNA polymerase zeta catalytic subunit OS Homo sapiens GN REV3L PE 1 SV 2	Regular	15.5112	46.11	356198	28	22	222	1.34	92005	7668	23532	1.7526	0.6243	Red
8682	Q6UXG2	K1324_HUMAN	UPF0577 protein KIAA1324 OS Homo sapiens GN KIAA1324 PE 2 SV 2	Regular	15.5049	46.09	114518	8	3	64	1.09	45072	9648	7078	2.2051	0.2525	Red
8615	Q15652	JHD2C_HUMAN	Probable JmjC domain containing histone demethylation protein 2C OS Homo sapiens GN JMJD1C PE 1 SV 2	Regular	15.3555	46.1	286578	25	15	202	0.28	52439	5367	22151	1.2267	0.3515	Red
1072	O14497	ARI1A_HUMAN	AT rich interactive domain containing protein 1A OS Homo sapiens GN ARID1A PE 1 SV 3	Regular	15.188	46.12	242958	18	11	117	1.58	282272	21516	39448	4.9176	1.1948	Red
20157	Q05481	ZNF91_HUMAN	Zinc finger protein 91 OS Homo sapiens GN ZNF91 PE 2 SV 2	Regular	15.0996	46.1	141780	12	7	83	0.59	29223	5871	14080	1.3419	0.1902	Red
10854	Q9NYA4	MTMR4_HUMAN	Myotubularin related protein 4 OS Homo sapiens GN MTMR4 PE 2 SV 2	Regular	14.9616	46.11	136376	10	5	93	1.84	37485	7071	9603	1.6161	0.2204	Red
10534	Q9UL63	MKLN1_HUMAN	Muskelin OS Homo sapiens GN MKLN1 PE 1 SV 2	Regular	14.7983	46.11	85965.5	11	7	64	0.95	34771	6687	8401	1.5284	0.1314	Red
6066	Q9BXW9	FACD2_HUMAN	Fanconi anemia group D2 protein OS Homo sapiens GN FANCD2 PE 1 SV 1	Regular	14.7729	46.09	168401	10	7	104	1.02	35894	8878.5	5554	2.0292	0.3417	Red
18799	Q6UXI7	VITRN_HUMAN	Vitrin OS Homo sapiens GN VIT PE 2 SV 1	Regular	14.6141	46.07	74500.6	7	6	49	1.03	30114	2793	8625	0.6384	0.0476	Red
10373	Q12866	MERTK_HUMAN	Tyrosine protein kinase Mer OS Homo sapiens GN MERTK PE 1 SV 2	Regular	14.5934	46.05	111219	9	5	64	2.3	23501	3502.5	3240	0.8005	0.089	Red
4856	Q96M86	DNHD1_HUMAN	Dynein heavy chain domain containing protein 1 OS Homo sapiens GN DNHD1 PE 1 SV 2	Regular	14.5316	46.08	539804	24	18	288	1.16	90105	6026	24282	1.3773	0.7435	Red
13769	Q5FWE3	PRRT3_HUMAN	Proline rich transmembrane protein 3 OS Homo sapiens GN PRRT3 PE 1 SV 3	Regular	14.5229	46.08	102768	9	4	50	0.82	17413	12006	11731	2.7441	0.282	Red
791	Q8IWZ3	ANKH1_HUMAN	Ankyrin repeat and KH domain containing protein 1 OS Homo sapiens GN ANKHD1 PE 1 SV 1	Regular	14.4764	46.08	271454	17	13	135	1.22	48779	8979	15749	2.0522	0.5571	Red
10500	Q96T58	MINT_HUMAN	Msx2 interacting protein OS Homo sapiens GN SPEN PE 1 SV 1	Regular	14.4189	46.09	403275	29	19	286	1.58	70435	15312	25498	3.4997	1.4113	Red
19739	Q9Y2X9	ZN281_HUMAN	Zinc finger protein 281 OS Homo sapiens GN ZNF281 PE 1 SV 1	Regular	14.2323	46.09	97656.2	4	2	51	3.35	12996	19494	2351	4.4555	0.4351	Red
7621	Q9ULI3	HEG1_HUMAN	Protein HEG homolog 1 OS Homo sapiens GN HEG1 PE 1 SV 3	Regular	14.2176	46.07	149115	18	7	79	1.52	27319	8259	11485	1.8877	0.2815	Red
213	O95477	ABCA1_HUMAN	ATP binding cassette sub family A member 1 OS Homo sapiens GN ABCA1 PE 1 SV 3	Regular	13.7249	46.28	256527	14	10	158	0.49	49195	2559	8531	0.5849	0.15	Red
8039	Q8NAC3	I17RC_HUMAN	Interleukin 17 receptor C OS Homo sapiens GN IL17RC PE 1 SV 2	Regular	13.7247	46.26	87836.5	4	4	49	2.15	30983	22230	3084	5.0808	0.4463	Red
3203	Q6ZVL6	CK041_HUMAN	UPF0606 protein C11orf41 OS Homo sapiens GN C11orf41 PE 2 SV 2	Regular	13.5433	46.27	199228	6	7	94	2.27	163726	73296	21214	16.7523	3.3375	Red
2675	Q9BYE9	CDHR2_HUMAN	Cadherin related family member 2 OS Homo sapiens GN CDHR2 PE 1 SV 2	Regular	13.4602	46.25	142227	6	3	70	2.98	8825	11089.5	4638	2.5346	0.3605	Red
12685	Q96RG2	PASK_HUMAN	PAS domain containing serine threonine protein kinase OS Homo sapiens GN PASK PE 1 SV 3	Regular	13.4561	46.23	145439	5	3	93	1.89	8113	5583	2671	1.276	0.1856	Red
16206	A7XYQ1	SOBP_HUMAN	Sine oculis binding protein homolog OS Homo sapiens GN SOBP PE 2 SV 2	Regular	13.4126	46.21	93912.5	5	4	61	2.86	18100	2769	3074	0.6329	0.0594	Red
6485	Q5SZK8	FREM2_HUMAN	FRAS1 related extracellular matrix protein 2 OS Homo sapiens GN FREM2 PE 1 SV 2	Regular	13.3011	46.21	352811	27	16	197	0.79	53846	3676.5	30562	0.8403	0.2965	Red
17302	Q8N6V9	TEX9_HUMAN	Testis expressed sequence 9 protein OS Homo sapiens GN TEX9 PE 2 SV 1	Regular	13.2254	46.21	45054	7	4	33	1.79	188126	14913	45904	3.4085	0.1536	Red
11367	O94856	NFASC_HUMAN	Neurofascin OS Homo sapiens GN NFASC PE 1 SV 4	Regular	13.1942	46.22	150882	15	7	96	0.74	30482	12093	9957	2.7639	0.417	Red
1873	Q4AC94	C2CD3_HUMAN	C2 domain containing protein 3 OS Homo sapiens GN C2CD3 PE 1 SV 4	Regular	13.0217	46.29	262784	17	10	168	1.06	75878	12274	13839	2.8053	0.7372	Red	40108 4059 10152 30551 30380 18695 24656 39347
7312	P48058	GRIA4_HUMAN	Glutamate receptor 4 OS Homo sapiens GN GRIA4 PE 2 SV 2	Regular	12.9234	46.31	101613	8	5	62	2.11	75496	3718.5	13960	0.8499	0.0864	Red
9121	Q8N4N3	KLH36_HUMAN	Kelch like protein 36 OS Homo sapiens GN KLHL36 PE 1 SV 1	Regular	12.9125	46.29	70865.6	6	5	48	3.08	79027	11395.5	20174	2.6045	0.1846	Red
1318	Q2TAZ0	ATG2A_HUMAN	Autophagy related protein 2 homolog A OS Homo sapiens GN ATG2A PE 1 SV 3	Regular	12.8639	46.28	215027	8	5	127	0.77	11608	6939	3936	1.586	0.341	Red
10557	Q03164	MLL1_HUMAN	Histone lysine N methyltransferase MLL OS Homo sapiens GN MLL PE 1 SV 5	Regular	12.1525	46.41	436327	26	17	260	1.03	104684	56638	20163	12.945	5.6483	Red
8966	O15054	KDM6B_HUMAN	Lysine specific demethylase 6B OS Homo sapiens GN KDM6B PE 1 SV 4	Regular	12.1025	46.42	178286	6	6	107	0.91	24945	19008	2386	4.3444	0.7745	Red
13200	P98161	PKD1_HUMAN	Polycystin 1 OS Homo sapiens GN PKD1 PE 1 SV 3	Regular	11.7321	46.47	467947	29	14	206	0.81	60032	20968	26375	4.7924	2.2426	Red	19319
6211	Q9Y6R7	FCGBP_HUMAN	IgGFc binding protein OS Homo sapiens GN FCGBP PE 1 SV 3	Regular	11.356	46.54	596824	14	8	249	0.3	31765	3729	7568	0.8523	0.5087	Red
1443	P04920	B3A2_HUMAN	Anion exchange protein 2 OS Homo sapiens GN SLC4A2 PE 1 SV 4	Regular	11.3118	46.52	137580	11	6	84	0.4	18355	7323	5765	1.6737	0.2303	Red
13565	Q6ZMI0	PPR21_HUMAN	Protein phosphatase 1 regulatory subunit 21 OS Homo sapiens GN PPP1R21 PE 1 SV 1	Regular	11.2332	46.52	88827.9	9	7	69	3.72	87089	28632	10819	6.544	0.5813	Red
490	Q9H2P0	ADNP_HUMAN	Activity dependent neuroprotector homeobox protein OS Homo sapiens GN ADNP PE 1 SV 1	Regular	11.2169	46.5	124932	12	6	94	1.91	42000	41073	14794	9.3875	1.1728	Red
17012	Q8IZX4	TAF1L_HUMAN	Transcription initiation factor TFIID subunit 1 like OS Homo sapiens GN TAF1L PE 1 SV 1	Regular	11.0821	46.5	208842	13	7	140	0.88	68943	13708.5	13482	3.1332	0.6543	Red
16897	Q8N3T6	T132C_HUMAN	Transmembrane protein 132C OS Homo sapiens GN TMEM132C PE 2 SV 3	Regular	11.0344	46.53	122700	12	6	81	1.44	17607	9052.5	9456	2.069	0.2539	Red
9959	O60449	LY75_HUMAN	Lymphocyte antigen 75 OS Homo sapiens GN LY75 PE 1 SV 3	Regular	11.0004	46.53	201961	11	7	130	1.97	109557	89819	7015	20.5288	4.146	Red
10281	Q6DN14	MCTP1_HUMAN	Multiple C2 and transmembrane domain containing protein 1 OS Homo sapiens GN MCTP1 PE 2 SV 2	Regular	10.8203	46.56	112480	8	4	87	2.2	14715	14778	4318	3.3776	0.3799	Red
19832	Q96JG9	ZN469_HUMAN	Zinc finger protein 469 OS Homo sapiens GN ZNF469 PE 1 SV 3	Regular	10.6101	46.54	414422	28	16	252	0.89	76217	17447	22368	3.9876	1.6526	Red
3627	P39059	COFA1_HUMAN	Collagen alpha 1 XV chain OS Homo sapiens GN COL15A1 PE 1 SV 2	Regular	10.6095	46.52	142291	8	5	60	0.5	7425	2490	5378	0.5691	0.081	Red
8667	A7E2V4	K0913_HUMAN	Zinc finger SWIM domain containing protein KIAA0913 OS Homo sapiens GN KIAA0913 PE 1 SV 1	Regular	10.3997	46.52	199465	8	3	113	0.6	21559	3441	9025	0.7865	0.1569	Yellow
15471	O94885	SASH1_HUMAN	SAM and SH3 domain containing protein 1 OS Homo sapiens GN SASH1 PE 1 SV 3	Regular	9.8517	46.55	137737	11	7	93	0.8	44565	7542	11421	1.7238	0.2374	Red
6779	O00591	GBRP_HUMAN	Gamma aminobutyric acid receptor subunit pi OS Homo sapiens GN GABRP PE 1 SV 1	Regular	9.6405	46.59	51039.5	3	2	30	4.32	13055	22278	4109	5.0918	0.2599	Red
7604	P42858	HD_HUMAN	Huntingtin OS Homo sapiens GN HTT PE 1 SV 2	Regular	9.1934	46.71	351596	16	10	207	1.3	60022	7925	15096	1.8113	0.6369	Red
1785	Q9Y2F9	BTBD3_HUMAN	BTB POZ domain containing protein 3 OS Homo sapiens GN BTBD3 PE 2 SV 1	Regular	9.0645	46.69	59275.3	4	2	37	2.11	12328	28755	3150	6.5722	0.3896	Red
14961	Q8TEU7	RPGF6_HUMAN	Rap guanine nucleotide exchange factor 6 OS Homo sapiens GN RAPGEF6 PE 1 SV 2	Regular	9.0537	46.67	180963	13	8	123	0.87	141366	2763	8686	0.6315	0.1143	Red
11674	Q86VF7	NRAP_HUMAN	Nebulin related anchoring protein OS Homo sapiens GN NRAP PE 2 SV 2	Regular	8.7492	46.69	198044	14	13	168	1.97	86006	17280	13511	3.9495	0.7822	Red
12613	Q86YC2	PALB2_HUMAN	Partner and localizer of BRCA2 OS Homo sapiens GN PALB2 PE 1 SV 1	Regular	8.2985	46.72	133063	4	3	89	1.43	14239	4131	9538	0.9442	0.1256	Red
19741	Q8N7M2	ZN283_HUMAN	Zinc finger protein 283 OS Homo sapiens GN ZNF283 PE 2 SV 4	Regular	8.0132	46.77	80394.2	1	3	52	1.33	12110	5523	2060	1.2623	0.1015	Red
2005	Q13936	CAC1C_HUMAN	Voltage dependent L type calcium channel subunit alpha 1C OS Homo sapiens GN CACNA1C PE 1 SV 4	Regular	7.7249	46.75	251486	5	7	124	0.81	77237	8680.5	7166	1.984	0.4989	Red
18049	Q9H8W5	TRI45_HUMAN	Tripartite motif containing protein 45 OS Homo sapiens GN TRIM45 PE 1 SV 2	Regular	7.7091	46.73	66297.9	5	2	53	1.9	11185	18132	5354	4.1442	0.2748	Red
1876	Q9P2K1	C2D2A_HUMAN	Coiled coil and C2 domain containing protein 2A OS Homo sapiens GN CC2D2A PE 1 SV 3	Regular	7.5305	46.75	186870	9	7	108	0.86	73837	53409	11698	12.207	2.2811	Red
14465	P22670	RFX1_HUMAN	MHC class II regulatory factor RFX1 OS Homo sapiens GN RFX1 PE 1 SV 2	Regular	7.3355	46.78	105100	6	3	39	1.23	8169	11616	4850	2.6549	0.279	Red
16432	Q68D10	SPT2_HUMAN	Protein SPT2 homolog OS Homo sapiens GN SPTY2D1 PE 1 SV 3	Regular	7.2934	46.76	75712.9	7	4	64	1.17	24326	24297	4577	5.5533	0.4205	Red
9890	Q14767	LTBP2_HUMAN	Latent transforming growth factor beta binding protein 2 OS Homo sapiens GN LTBP2 PE 1 SV 3	Regular	7.1302	46.74	204176	5	3	89	1.15	12545	19926	1917	4.5542	0.9299	Red
4422	Q5VWQ8	DAB2P_HUMAN	Disabled homolog 2 interacting protein OS Homo sapiens GN DAB2IP PE 1 SV 2	Regular	7.067	46.72	132595	8	5	105	0.84	30836	5592	5530	1.2781	0.1695	Red
14904	Q01973	ROR1_HUMAN	Tyrosine protein kinase transmembrane receptor ROR1 OS Homo sapiens GN ROR1 PE 1 SV 2	Regular	7.0637	46.7	105880	5	5	58	0.85	54545	41106	12261	9.3951	0.9947	Red
13750	Q9BWN1	PRR14_HUMAN	Proline rich protein 14 OS Homo sapiens GN PRR14 PE 1 SV 1	Regular	6.8222	46.7	64727.7	5	3	39	0.85	33213	6957	3302	1.5901	0.1029	Red
18105	Q96GJ1	TRM2_HUMAN	tRNA uracil 54 C 5 methyltransferase homolog OS Homo sapiens GN TRMT2B PE 2 SV 1	Regular	6.3311	46.71	57217.8	4	4	36	1.98	13559	7896	2900	1.8047	0.1033	Red
13265	Q6P1J6	PLB1_HUMAN	Phospholipase B1 membrane associated OS Homo sapiens GN PLB1 PE 1 SV 3	Regular	6.0986	46.69	164963	6	2	101	0.62	12880	28242	17573	6.4549	1.0648	Red
12483	Q96HA1	P121A_HUMAN	Nuclear envelope pore membrane protein POM 121 OS Homo sapiens GN POM121 PE 1 SV 2	Regular	6.0275	46.67	128177	4	3	73	2	9434	7449	2032	1.7025	0.2182	Red
235	Q96J66	ABCCB_HUMAN	ATP binding cassette sub family C member 11 OS Homo sapiens GN ABCC11 PE 1 SV 1	Regular	5.7136	46.67	155955	11	4	78	1.23	19698	14916	8578	3.4092	0.5317	Red
4735	Q14147	DHX34_HUMAN	Probable ATP dependent RNA helicase DHX34 OS Homo sapiens GN DHX34 PE 2 SV 2	Regular	5.6482	46.65	129260	2	5	92	0.87	18459	38925	4553	8.8966	1.15	Red
13352	Q9ULL4	PLXB3_HUMAN	Plexin B3 OS Homo sapiens GN PLXNB3 PE 1 SV 2	Regular	5.4324	46.65	210440	7	4	106	0.79	9998	19542	4772	4.4665	0.9399	Red
5454	O75355	ENTP3_HUMAN	Ectonucleoside triphosphate diphosphohydrolase 3 OS Homo sapiens GN ENTPD3 PE 1 SV 2	Regular	4.7843	46.66	59846.7	6	3	33	1.51	87788	244050	3161	55.7794	3.3382	Red
5469	Q96L91	EP400_HUMAN	E1A binding protein p400 OS Homo sapiens GN EP400 PE 1 SV 4	Regular	4.6854	46.64	344915	5	5	176	0.92	10385	5515.5	6183	1.2606	0.4348	Red
17273	Q99973	TEP1_HUMAN	Telomerase protein component 1 OS Homo sapiens GN TEP1 PE 1 SV 2	Regular	3.4322	46.66	293684	22	11	182	0.34	97959	8334	13916	1.9048	0.5594	Yellow
19319	Q6ZNL0	YP009_HUMAN	GPS PLAT and transmembrane domain containing protein FLJ00285 OS Homo sapiens PE 2 SV 2	Regular	3.2004	46.66	90073.9	3	2	49	1.77	8264	19716	2679	4.5062	0.4059	Red	13200
10885	Q9UKN1	MUC12_HUMAN	Mucin 12 OS Homo sapiens GN MUC12 PE 1 SV 2	Regular	2.1954	46.64	559076	5	3	151	0.16	4177	5916	2601	1.3521	0.756	Red
19809	Q9H8G1	ZN430_HUMAN	Zinc finger protein 430 OS Homo sapiens GN ZNF430 PE 2 SV 3	Regular	2.192	46.63	68200.5	3	2	49	1.58	12882	5433	2536	1.2418	0.0847	Red	19584
2296	Q6NXP0	CC025_HUMAN	EF hand domain containing protein C3orf25 OS Homo sapiens GN C3orf25 PE 2 SV 1	Regular	1.8563	46.61	67064.1	6	3	48	1.57	8115	4743	6814	1.084	0.0727	Red
33316	RANDOM13083	RANDOM13083	Random Sequence 13083	Random	322.18	0	96413	7	1	70	0.71	140399	0	29212			Green	9510 9509
30791	RANDOM10558	RANDOM10558	Random Sequence 10558	Random	2.0447	0	447930	0	1	275	0	2257	0	244			Red	7510
35987	RANDOM15754	RANDOM15754	Random Sequence 15754	Random	0.7187	0	141067	0	1	104	0	4555	0	461			Red	10117
26352	RANDOM6119	RANDOM6119	Random Sequence 6119	Random	1.1602	0	284617	2	1	202	0	10639	0	701			Red	16445 7348
40108	RANDOM19875	RANDOM19875	Random Sequence 19875	Random	0.3973	0	148283	2	1	110	0	32799	0	709			Red	4059 1873 10152 30551 30380 18695 24656 39347
24656	RANDOM4423	RANDOM4423	Random Sequence 4423	Random	0.3973	0	133320	2	1	84	0	32799	0	709			Red	40108 4059 1873 10152 30551 30380 18695 39347
30551	RANDOM10318	RANDOM10318	Random Sequence 10318	Random	0.3973	0	246662	2	1	167	0	32799	0	709			Red	40108 4059 1873 10152 30380 18695 24656 39347
30380	RANDOM10147	RANDOM10147	Random Sequence 10147	Random	0.3973	0	68082.3	2	1	51	0	32799	0	709			Red	40108 4059 1873 10152 30551 18695 24656 39347
39347	RANDOM19114	RANDOM19114	Random Sequence 19114	Random	0.3973	0	135739	2	1	87	0	32799	0	709			Red	40108 4059 1873 10152 30551 30380 18695 24656
36109	RANDOM15876	RANDOM15876	Random Sequence 15876	Random	13.0307	0	223919	1	1	144	0.25	29427	0	1061			Red	2402 8459 25694
25694	RANDOM5461	RANDOM5461	Random Sequence 5461	Random	13.0307	0	60033.2	1	1	46	0.93	29427	0	1061			Red	2402 8459 36109
26594	RANDOM6361	RANDOM6361	Random Sequence 6361	Random	8.1124	0	297448	2	1	186	0.15	7163	0	1374			Red	39234 5125 18092 31963 1302 968 13591 31173 38504 16651 17431
31963	RANDOM11730	RANDOM11730	Random Sequence 11730	Random	8.1124	0	87800.8	2	1	66	0.52	7163	0	1374			Red	39234 5125 26594 18092 1302 968 13591 31173 38504 16651 17431
39234	RANDOM19001	RANDOM19001	Random Sequence 19001	Random	8.1124	0	195169	2	1	130	0.23	7163	0	1374			Red	5125 26594 18092 31963 1302 968 13591 31173 38504 16651 17431
31173	RANDOM10940	RANDOM10940	Random Sequence 10940	Random	8.1124	0	106778	2	1	81	0.43	7163	0	1374			Red	39234 5125 26594 18092 31963 1302 968 13591 38504 16651 17431
38504	RANDOM18271	RANDOM18271	Random Sequence 18271	Random	8.1124	0	307147	2	1	198	0.15	7163	0	1374			Red	39234 5125 26594 18092 31963 1302 968 13591 31173 16651 17431
30640	RANDOM10407	RANDOM10407	Random Sequence 10407	Random	0.1848	0	156541	0	1	100	0	1859	0	230			Red	3668 38977
38977	RANDOM18744	RANDOM18744	Random Sequence 18744	Random	0.1848	0	54569.6	0	1	40	0	1859	0	230			Red	3668 30640
33880	RANDOM13647	RANDOM13647	Random Sequence 13647	Random	18.6203	0	327226	9	2	214	0.17	49844	0	4713			Yellow	18092 8780
29139	RANDOM8906	RANDOM8906	Random Sequence 8906	Random	0.3796	0	48313.1	0	1	34	0	9741	0	3557			Red	17063
22110	RANDOM1877	RANDOM1877	Random Sequence 1877	Random	0.225	0	182767	1	1	117	0	14467	0	1501			Red	2820
30793	RANDOM10560	RANDOM10560	Random Sequence 10560	Random	7.4483	0	552326	2	1	358	0	5671	0	562			Red	16063
24293	RANDOM4060	RANDOM4060	Random Sequence 4060	Random	0.1111	0	415608	2	1	272	0	36616	0	522			Red	18692
26265	RANDOM6032	RANDOM6032	Random Sequence 6032	Random	4.943	0	114126	1	1	86	0	1239	0	462			Red	15723 25346 16796
25346	RANDOM5113	RANDOM5113	Random Sequence 5113	Random	4.943	0	508920	1	1	337	0	1239	0	462			Red	15723 26265 16796
27529	RANDOM7296	RANDOM7296	Random Sequence 7296	Random	1.2921	0	216929	2	1	140	0	950	0	430			Red	13603
23808	RANDOM3575	RANDOM3575	Random Sequence 3575	Random	2.9046	0	154593	4	1	108	0	10539	0	1483			Red	13677
25133	RANDOM4900	RANDOM4900	Random Sequence 4900	Random	3.1768	0	235417	3	1	171	0	46479	0	5189			Red	5114 5115
37410	RANDOM17177	RANDOM17177	Random Sequence 17177	Random	15.9952	0	221815	4	1	135	0	1011	0	1902			Red	5114
23249	RANDOM3016	RANDOM3016	Random Sequence 3016	Random	8.9374	0	325429	3	1	222	0	984	0	503			Red	15844
28908	RANDOM8675	RANDOM8675	Random Sequence 8675	Random	1.4195	0	560097	1	1	372	0.1	8214	0	449			Red	5368
39058	RANDOM18825	RANDOM18825	Random Sequence 18825	Random	1.5732	0	425894	2	1	297	0	6621	0	1374			Red	18847 8572 8660 35176
35130	RANDOM14897	RANDOM14897	Random Sequence 14897	Random	12.974	0	157908	2	1	115	0.36	13186	0	5113			Red	18847
35176	RANDOM14943	RANDOM14943	Random Sequence 14943	Random	1.5732	0	157601	2	1	114	0	6621	0	1374			Red	18847 8572 39058 8660
37131	RANDOM16898	RANDOM16898	Random Sequence 16898	Random	7.4258	0	124213	2	1	81	0.45	2858	0	812			Red	17176
38847	RANDOM18614	RANDOM18614	Random Sequence 18614	Random	12.8153	0	169913	4	1	118	0.46	17377	0	1083			Red	1728
29912	RANDOM9679	RANDOM9679	Random Sequence 9679	Random	2.7692	0	189475	3	1	133	0	8225	0	1276			Red	16338 2771
24877	RANDOM4644	RANDOM4644	Random Sequence 4644	Random	1.2866	0	145725	1	1	94	0	6417	0	441			Red	10930 39681
39681	RANDOM19448	RANDOM19448	Random Sequence 19448	Random	1.2866	0	316424	1	1	207	0	6417	0	441			Red	10930 24877
36296	RANDOM16063	RANDOM16063	Random Sequence 16063	Random	1.1898	0	185008	2	1	121	0	1976	0	473			Red	18499 25356
25356	RANDOM5123	RANDOM5123	Random Sequence 5123	Random	1.1898	0	506663	2	1	349	0	1976	0	473			Red	36296 18499
33002	RANDOM12769	RANDOM12769	Random Sequence 12769	Random	0.3072	0	104776	1	1	73	0	3129	0	312			Red	10983
20459	RANDOM226	RANDOM226	Random Sequence 226	Random	0.5134	0	568613	1	1	382	0	1341	0	587			Red	18549
21898	RANDOM1665	RANDOM1665	Random Sequence 1665	Random	4.4126	0	159650	2	1	113	0	4620	0	492			Red	14500
20997	RANDOM764	RANDOM764	Random Sequence 764	Random	0.7357	0	199210	0	1	132	0.34	910	0	586			Red	10863
24356	RANDOM4123	RANDOM4123	Random Sequence 4123	Random	2.5073	0	132855	1	1	90	0	5465	0	1168			Red	1250
