# Supplementary material for: Targeting Hodgkin and Reed–Sternberg Cells with an Inhibitor of Heat-Shock Protein 90: Molecular Pathways of Response and Potential Mechanisms of Resistance
Source: Int J Mol Sci. 2018 Mar 13;19(3):836. doi: 10.3390/ijms19030836 (PMC5877697; doi:10.3390/ijms19030836)
Supplement: Supplementary file 1 [file ijms-19-00836-s001.zip › Supplementary Table S3.xlsx]

## Sheet: 20140319_L428_NT_1_2D58MIN_01_I
protein.key	protein.Entry	protein.Accession	protein.Description	protein.dataBaseType	protein.score	protein.falsePositiveRate	protein.avgMass	protein.MatchedProducts	protein.matchedPeptides	protein.digestPeps	protein.seqCover(%)	protein.MatchedPeptideIntenSum	protein.top3MatchedPeptideIntenSum	protein.MatchedProductIntenSum	protein.fmolOnColumn	protein.ngramOnColumn	protein.AutoCurate	protein.Key_ForHomologs
389	P63261	ACTG_HUMAN	Actin cytoplasmic 2 OS Homo sapiens GN ACTG1 PE 1 SV 1	Regular	93679.2	0	42135.1	391	25	34	72	16951960	5637861	7129582	1398.91	58.9434	Green	388 13462 13467 385
6615	P04406	G3P_HUMAN	Glyceraldehyde 3 phosphate dehydrogenase OS Homo sapiens GN GAPDH PE 1 SV 3	Regular	75738.5	0	36224.4	264	17	21	68.36	7393277	3639428	2996412	903.046	32.7123	Green
13020	P00558	PGK1_HUMAN	Phosphoglycerate kinase 1 OS Homo sapiens GN PGK1 PE 1 SV 3	Regular	61474.7	0	45014	385	35	33	73.38	7827101	2003752	2894488	497.188	22.3804	Green	10517 23247
17921	P60174	TPIS_HUMAN	Triosephosphate isomerase OS Homo sapiens GN TPI1 PE 1 SV 3	Regular	57600.8	0	31076.2	265	20	26	78.67	4906035	1540425	2052069	382.223	11.878	Green
9183	P14618	KPYM_HUMAN	Pyruvate kinase isozymes M1 M2 OS Homo sapiens GN PKM PE 1 SV 4	Regular	57068.5	0	58507.3	438	31	43	63.65	8792824	2135659	3612509	529.918	31.0041	Green	9184
13526	P62937	PPIA_HUMAN	Peptidyl prolyl cis trans isomerase A OS Homo sapiens GN PPIA PE 1 SV 2	Regular	52712.7	0	18240.6	166	15	12	85.45	3853392	1888504	1291036	468.592	8.5474	Green	13527 19563
5431	P06733	ENOA_HUMAN	Alpha enolase OS Homo sapiens GN ENO1 PE 1 SV 2	Regular	49707.8	0	47511.2	240	20	31	50.46	6949454	2234683	3007887	554.489	26.3444	Green	5434 5432
13712	P07737	PROF1_HUMAN	Profilin 1 OS Homo sapiens GN PFN1 PE 1 SV 2	Regular	45864.9	0	15225.3	126	11	16	77.86	2443280	1609453	818029	399.351	6.0803	Green	10475 14402
388	P68032	ACTC_HUMAN	Actin alpha cardiac muscle 1 OS Homo sapiens GN ACTC1 PE 1 SV 1	Regular	39571.9	0	42361.2	197	18	34	48.54	10130560	2028772	4127876	503.396	21.3245	Green	389 13462 13467 385
8	P63104	1433Z_HUMAN	14 3 3 protein zeta delta OS Homo sapiens GN YWHAZ PE 1 SV 1	Regular	39354.6	0	27916.2	160	17	25	73.06	2194209	633650	806735	157.227	4.3892	Green	2 4 5 7 25356 3
9509	P00338	LDHA_HUMAN	L lactate dehydrogenase A chain OS Homo sapiens GN LDHA PE 1 SV 2	Regular	38115.6	0	36973.9	221	21	31	60.54	4498209	1463872	1405223	363.228	13.43	Green	9510 9511 33316 9507
9510	P07195	LDHB_HUMAN	L lactate dehydrogenase B chain OS Homo sapiens GN LDHB PE 1 SV 2	Regular	37051.3	0	36923.7	218	18	25	53.29	4480118	1419191	1485948	352.142	13.0024	Green	9511 9509 33316 9507
13462	Q6S8J3	POTEE_HUMAN	POTE ankyrin domain family member E OS Homo sapiens GN POTEE PE 1 SV 3	Regular	35449.7	0	122961	156	17	100	19.35	6487343	10510	2702532	2.6078	0.3207	Green	389 388 13467 385
5228	Q5VTE0	EF1A3_HUMAN	Putative elongation factor 1 alpha like 3 OS Homo sapiens GN EEF1A1P5 PE 5 SV 1	Regular	35116.7	0	50527.3	237	18	32	54.33	4609077	1835990	1580540	455.561	23.0183	Green
12997	P18669	PGAM1_HUMAN	Phosphoglycerate mutase 1 OS Homo sapiens GN PGAM1 PE 1 SV 2	Regular	31934.4	0	28918	160	13	20	53.54	1466295	615626	495277	152.754	4.4174	Green	12999
7877	P08238	HS90B_HUMAN	Heat shock protein HSP 90 beta OS Homo sapiens GN HSP90AB1 PE 1 SV 4	Regular	30075.9	0	83606.5	373	42	67	58.56	5773142	908497	1938840	225.424	18.8469	Green	5439 7516 7876
7899	P11142	HSP7C_HUMAN	Heat shock cognate 71 kDa protein OS Homo sapiens GN HSPA8 PE 1 SV 1	Regular	27800.9	0	71126.3	324	33	50	57.59	3761748	663069	1337043	164.526	11.7021	Green	7349 7894 7871 7898 7897 7348
7	P27348	1433T_HUMAN	14 3 3 protein theta OS Homo sapiens GN YWHAQ PE 1 SV 1	Regular	27553.2	0	28049.4	148	16	24	54.69	1764117	472581	671565	117.261	3.2891	Green	2 19077 4 5 8 3
3	P62258	1433E_HUMAN	14 3 3 protein epsilon OS Homo sapiens GN YWHAE PE 1 SV 1	Regular	24304.8	0	29345	115	12	29	43.92	1430909	474651	532469	117.774	3.4561	Green	2 4 5 7 8
5432	P13929	ENOB_HUMAN	Beta enolase OS Homo sapiens GN ENO3 PE 1 SV 4	Regular	23135.7	0	47274	89	12	28	35.71	2201488	957898	1039531	237.682	11.2362	Green	5434 5431
7876	P07900	HS90A_HUMAN	Heat shock protein HSP 90 alpha OS Homo sapiens GN HSP90AA1 PE 1 SV 5	Regular	22392.9	0	85059.1	350	43	92	57.51	4817628	536022	1546083	133.002	11.3131	Green	7516 7877
385	Q562R1	ACTBL_HUMAN	Beta actin like protein 2 OS Homo sapiens GN ACTBL2 PE 1 SV 2	Regular	22386.8	0	42345.5	107	9	35	20.74	7367274	4353601	2970746	1080.25	45.7438	Green	389 388 13467 13462
11621	P06748	NPM_HUMAN	Nucleophosmin OS Homo sapiens GN NPM1 PE 1 SV 2	Regular	20677.9	0	32746.2	130	13	22	50	1408899	680473	560091	168.845	5.529	Green
17082	P07437	TBB5_HUMAN	Tubulin beta chain OS Homo sapiens GN TUBB PE 1 SV 2	Regular	18921.8	0	50127.2	191	18	30	54.28	1725238	562745	666651	139.633	6.9994	Green	17077 17081 17076
11230	P22392	NDKB_HUMAN	Nucleoside diphosphate kinase B OS Homo sapiens GN NME2 PE 1 SV 1	Regular	18771.6	0	17412.1	78	10	14	56.58	1233435	405493	350852	100.614	1.7519	Green	11228 11229
17028	P37802	TAGL2_HUMAN	Transgelin 2 OS Homo sapiens GN TAGLN2 PE 1 SV 3	Regular	18550.3	0	22562.6	116	13	25	70.35	1100755	434843	413997	107.897	2.4344	Green	17029
7473	Q99878	H2A1J_HUMAN	Histone H2A type 1 J OS Homo sapiens GN HIST1H2AJ PE 1 SV 3	Regular	18543	0	13936.3	36	3	7	27.34	502421	499803	161979	124.015	1.7283	Green	7486
17067	P68363	TBA1B_HUMAN	Tubulin alpha 1B chain OS Homo sapiens GN TUBA1B PE 1 SV 1	Regular	17615	0	50836	171	17	34	50.33	1896473	508961	781799	126.288	6.42	Green	17069 17068
6059	Q01469	FABP5_HUMAN	Fatty acid binding protein epidermal OS Homo sapiens GN FABP5 PE 1 SV 3	Regular	17383.5	0	15506.6	83	10	14	69.63	646481	322854	199854	80.1093	1.2422	Green
14699	P62987	RL40_HUMAN	Ubiquitin 60S ribosomal protein L40 OS Homo sapiens GN UBA52 PE 1 SV 2	Regular	17381.7	0	15013.5	46	5	9	41.41	1240826	928843	378764	230.472	3.4602	Green
11228	O60361	NDK8_HUMAN	Putative nucleoside diphosphate kinase OS Homo sapiens GN NME2P1 PE 5 SV 1	Regular	17305.3	0	15700.2	61	8	13	59.12	1014266	25959.6	293495	6.4413	0.1011	Green	11230 11229
3625	P23528	COF1_HUMAN	Cofilin 1 OS Homo sapiens GN CFL1 PE 1 SV 3	Regular	17131.6	0	18730.6	81	10	19	53.61	660352	365406	226863	90.6676	1.6983	Green
5434	P09104	ENOG_HUMAN	Gamma enolase OS Homo sapiens GN ENO2 PE 1 SV 3	Regular	16883.4	0	47610.8	91	14	30	48.85	1339293	113021	710777	28.0437	1.3352	Green	5432 5431
5	P61981	1433G_HUMAN	14 3 3 protein gamma OS Homo sapiens GN YWHAG PE 1 SV 2	Regular	16437.9	0	28473.7	68	8	25	31.17	1042799	122445	393084	30.3822	0.8651	Green	2 4 8 7 25356 3
14711	P05386	RLA1_HUMAN	60S acidic ribosomal protein P1 OS Homo sapiens GN RPLP1 PE 1 SV 1	Regular	16334.3	0	11628	25	2	7	51.75	125019	187528	86969	46.5312	0.5411	Green
17068	Q9BQE3	TBA1C_HUMAN	Tubulin alpha 1C chain OS Homo sapiens GN TUBA1C PE 1 SV 1	Regular	15954.8	0	50579.7	145	15	34	41.43	1779112	0	739472			Green	17069 17067
0	P00330	ADH1_YEAST	Alcohol dehydrogenase 1 OS Saccharomyces cerevisiae strain ATCC 204508 S288c GN ADH1 PE 1 SV 5	Regular	14947.9	0	37305.4	123	16	25	50.29	2056001	806034	641360	200	7.4611	Green
12999	Q8N0Y7	PGAM4_HUMAN	Probable phosphoglycerate mutase 4 OS Homo sapiens GN PGAM4 PE 1 SV 1	Regular	14677.7	0	28948	45	5	19	34.25	572698	15918.8	208536	3.9499	0.1143	Green	12997
17077	Q13885	TBB2A_HUMAN	Tubulin beta 2A chain OS Homo sapiens GN TUBB2A PE 1 SV 1	Regular	14601.2	0	50306.3	151	13	30	45.84	1180996	168856	444589	41.898	2.1077	Green	17082 17081 17076
17081	P68371	TBB4B_HUMAN	Tubulin beta 4B chain OS Homo sapiens GN TUBB4B PE 1 SV 1	Regular	14327.6	0	50287.4	170	19	30	61.12	1232283	125498	450401	31.1397	1.5659	Green	17082 17077 17076
6518	Q16658	FSCN1_HUMAN	Fascin OS Homo sapiens GN FSCN1 PE 1 SV 3	Regular	14278	0	55157.3	265	24	42	58.01	2785836	848813	1017952	210.615	11.6169	Green
4383	P04080	CYTB_HUMAN	Cystatin B OS Homo sapiens GN CSTB PE 1 SV 2	Regular	14266.1	0	11196.6	39	4	7	55.1	302540	269136	58286	66.7803	0.7477	Green
17069	Q13748	TBA3C_HUMAN	Tubulin alpha 3C D chain OS Homo sapiens GN TUBA3C PE 1 SV 3	Regular	14108.4	0	50644	140	15	34	45.56	1555934	314026	609427	77.9188	3.9461	Green	17068 17067
13467	P0CG39	POTEJ_HUMAN	POTE ankyrin domain family member J OS Homo sapiens GN POTEJ PE 3 SV 1	Regular	13661.3	0	118816	95	12	97	13.2	4108848	11170.4	1290822	2.7717	0.3293	Green	389 388 13462 385
661	P04075	ALDOA_HUMAN	Fructose bisphosphate aldolase A OS Homo sapiens GN ALDOA PE 1 SV 2	Regular	13370	0	39876.3	152	21	31	83.79	1871845	715028	522736	177.419	7.0748	Green	663 662
14184	P62826	RAN_HUMAN	GTP binding nuclear protein Ran OS Homo sapiens GN RAN PE 1 SV 3	Regular	13234.6	0	24594.2	70	9	17	42.59	783477	439361	258713	109.018	2.6812	Green
11229	P15531	NDKA_HUMAN	Nucleoside diphosphate kinase A OS Homo sapiens GN NME1 PE 1 SV 1	Regular	12686.3	0	17319.8	67	8	15	53.29	940653	416182	293338	103.267	1.7886	Green	11230 11228
10490	P14174	MIF_HUMAN	Macrophage migration inhibitory factor OS Homo sapiens GN MIF PE 1 SV 4	Regular	12328.5	0	12647.4	32	4	6	36.52	449246	442581	152044	109.817	1.3889	Green
7802	P61978	HNRPK_HUMAN	Heterogeneous nuclear ribonucleoprotein K OS Homo sapiens GN HNRNPK PE 1 SV 1	Regular	12266	0	51261.5	150	19	38	51.19	1108873	350988	401975	87.0901	4.4644	Green
7516	Q58FF8	H90B2_HUMAN	Putative heat shock protein HSP 90 beta 2 OS Homo sapiens GN HSP90AB2P PE 1 SV 2	Regular	11400.3	0	44520.1	102	16	44	29.92	2046316	147532	595165	36.6068	1.6297	Green	5439 7877 7876
10297	P40925	MDHC_HUMAN	Malate dehydrogenase cytoplasmic OS Homo sapiens GN MDH1 PE 1 SV 4	Regular	11075.8	0	36654.3	101	15	34	46.71	858166	381405	260074	94.6374	3.4689	Green
13397	P00491	PNPH_HUMAN	Purine nucleoside phosphorylase OS Homo sapiens GN PNP PE 1 SV 2	Regular	10686	0	32346.1	102	15	21	62.98	671062	252134	219059	62.5616	2.0236	Green
4	Q04917	1433F_HUMAN	14 3 3 protein eta OS Homo sapiens GN YWHAH PE 1 SV 4	Regular	10661.9	0	28389.9	64	10	27	42.28	980004	68939	370576	17.1057	0.4856	Green	2 5 8 7 25356 3
2083	P62158	CALM_HUMAN	Calmodulin OS Homo sapiens GN CALM1 PE 1 SV 2	Regular	10313.8	0	16837.7	60	8	23	55.03	626485	393172	208555	97.5572	1.6426	Green
2	P31946	1433B_HUMAN	14 3 3 protein beta alpha OS Homo sapiens GN YWHAB PE 1 SV 3	Regular	9836.59	0	28196.5	53	8	22	28.46	1100590	122486	380868	30.3924	0.857	Green	4 5 8 7 3
7504	P57053	H2BFS_HUMAN	Histone H2B type F S OS Homo sapiens GN H2BFS PE 1 SV 2	Regular	9671.77	0	13944.2	41	6	11	46.03	396111	0	106175			Green	7491
7491	Q93079	H2B1H_HUMAN	Histone H2B type 1 H OS Homo sapiens GN HIST1H2BH PE 1 SV 3	Regular	9671.77	0	13892.1	41	6	11	46.03	396111	324659	106175	80.5571	1.1191	Green	7504
17398	P10599	THIO_HUMAN	Thioredoxin OS Homo sapiens GN TXN PE 1 SV 3	Regular	9085.23	0	12022.7	39	8	9	68.57	555044	464880	179206	115.35	1.3868	Green
12669	Q99497	PARK7_HUMAN	Protein DJ 1 OS Homo sapiens GN PARK7 PE 1 SV 2	Regular	8819.78	0	20062.2	51	7	27	42.33	421677	258909	186652	64.2427	1.2888	Green
7871	P34931	HS71L_HUMAN	Heat shock 70 kDa protein 1 like OS Homo sapiens GN HSPA1L PE 1 SV 2	Regular	7795.95	0	70774.3	54	8	48	13.88	771110	0	305411			Green	7349 7899 7894 7898 7897
17275	P55072	TERA_HUMAN	Transitional endoplasmic reticulum ATPase OS Homo sapiens GN VCP PE 1 SV 4	Regular	6900.07	0	90006.3	198	26	69	43.05	1073917	277079	393386	68.7512	6.188	Green
5234	P13639	EF2_HUMAN	Elongation factor 2 OS Homo sapiens GN EEF2 PE 1 SV 4	Regular	6721.07	0	96307.8	281	34	69	45.92	2384852	359205	682343	89.129	8.5838	Green	18406
15022	P62249	RS16_HUMAN	40S ribosomal protein S16 OS Homo sapiens GN RPS16 PE 1 SV 2	Regular	6626.45	0	16559.4	29	4	18	28.08	208318	161348	52674	40.035	0.663	Green
7897	P17066	HSP76_HUMAN	Heat shock 70 kDa protein 6 OS Homo sapiens GN HSPA6 PE 1 SV 2	Regular	6560.39	0	71484.5	44	8	56	11.82	502844	164532	222882	40.825	2.9184	Green	7899 7894 7871 7898
950	P27695	APEX1_HUMAN	DNA apurinic or apyrimidinic site lyase OS Homo sapiens GN APEX1 PE 1 SV 2	Regular	6285.11	0	35953.7	72	13	21	47.8	475933	219016	161533	54.3441	1.9539	Green
14712	P05387	RLA2_HUMAN	60S acidic ribosomal protein P2 OS Homo sapiens GN RPLP2 PE 1 SV 1	Regular	6238.18	0	11665	43	5	9	70.43	243992	189559	115700	47.035	0.5487	Green
7457	P16403	H12_HUMAN	Histone H1 2 OS Homo sapiens GN HIST1H1C PE 1 SV 2	Regular	6114.68	0	21364.8	86	12	20	33.33	1008549	634424	243386	157.419	3.3632	Green	7466
7898	P48741	HSP77_HUMAN	Putative heat shock 70 kDa protein 7 OS Homo sapiens GN HSPA7 PE 5 SV 2	Regular	6103.6	0	40472.6	30	4	28	9.81	406610	0	181349			Green	7899 7894 7871 7897
6627	P06744	G6PI_HUMAN	Glucose 6 phosphate isomerase OS Homo sapiens GN GPI PE 1 SV 4	Regular	6091.06	0	63375.4	141	25	40	51.79	1343466	431507	425358	107.069	6.7855	Green	16439
17197	P78371	TCPB_HUMAN	T complex protein 1 subunit beta OS Homo sapiens GN CCT2 PE 1 SV 4	Regular	5964.96	0	57830.5	142	21	47	46.73	549396	206529	198280	51.2457	2.9636	Green
7894	P08107	HSP71_HUMAN	Heat shock 70 kDa protein 1A 1B OS Homo sapiens GN HSPA1A PE 1 SV 5	Regular	5931.23	0	70337.5	54	12	49	21.84	541814	84370.2	241145	20.9346	1.4725	Green	7349 7899 7871 7898 7897
663	P09972	ALDOC_HUMAN	Fructose bisphosphate aldolase C OS Homo sapiens GN ALDOC PE 1 SV 2	Regular	5742.35	0	39855.1	55	7	33	25.82	464051	176048	222254	43.6826	1.741	Green	662 661
14887	P09651	ROA1_HUMAN	Heterogeneous nuclear ribonucleoprotein A1 OS Homo sapiens GN HNRNPA1 PE 1 SV 5	Regular	5441.56	0	38860.8	80	11	29	36.29	584751	351998	151815	87.3407	3.3941	Green	14889
16214	P00441	SODC_HUMAN	Superoxide dismutase Cu Zn OS Homo sapiens GN SOD1 PE 1 SV 2	Regular	5421.3	0	16163.9	49	8	13	66.88	284405	182133	99188	45.1924	0.7305	Green
13527	P23284	PPIB_HUMAN	Peptidyl prolyl cis trans isomerase B OS Homo sapiens GN PPIB PE 1 SV 2	Regular	5314.77	0	23799.6	57	10	21	34.72	389920	128595	105579	31.9081	0.7594	Green	13526 19563
7784	Q9UK76	HN1_HUMAN	Hematological and neurological expressed 1 protein OS Homo sapiens GN HN1 PE 1 SV 3	Regular	5277.57	0	16014.5	49	5	12	62.99	139716	118894	105818	29.501	0.4724	Green
992	P07741	APT_HUMAN	Adenine phosphoribosyltransferase OS Homo sapiens GN APRT PE 1 SV 2	Regular	5036.31	0	19778.9	37	4	18	32.78	149866	130176	60124	32.3004	0.6389	Green
13668	Q06830	PRDX1_HUMAN	Peroxiredoxin 1 OS Homo sapiens GN PRDX1 PE 1 SV 1	Regular	5011.08	0	22338.5	66	12	18	72.86	763071	321566	174692	79.7897	1.7824	Green	13671
10632	P26038	MOES_HUMAN	Moesin OS Homo sapiens GN MSN PE 1 SV 3	Regular	4911.38	0	67934.2	145	26	63	44.54	1084351	282073	347021	69.9904	4.7547	Green	5669 20996 14158 7618 38881
14888	P22626	ROA2_HUMAN	Heterogeneous nuclear ribonucleoproteins A2 B1 OS Homo sapiens GN HNRNPA2B1 PE 1 SV 2	Regular	4766.19	0	37486.8	77	12	29	36.26	712548	325849	181087	80.8524	3.0309	Green
7395	P09211	GSTP1_HUMAN	Glutathione S transferase P OS Homo sapiens GN GSTP1 PE 1 SV 2	Regular	4665.61	0	23584	30	5	15	40	174960	165033	61274	40.9494	0.9657	Green
752	P39687	AN32A_HUMAN	Acidic leucine rich nuclear phosphoprotein 32 family member A OS Homo sapiens GN ANP32A PE 1 SV 1	Regular	4612.96	0	28699.5	49	7	15	31.33	420666	194441	148537	48.2464	1.3846	Green	753
18441	P22314	UBA1_HUMAN	Ubiquitin like modifier activating enzyme 1 OS Homo sapiens GN UBA1 PE 1 SV 3	Regular	4479.62	0	118933	162	20	68	27.79	873224	240368	412261	59.6422	7.0934	Green
17198	P50991	TCPD_HUMAN	T complex protein 1 subunit delta OS Homo sapiens GN CCT4 PE 1 SV 4	Regular	4370.42	0	58437.6	71	12	42	27.83	417661	158884	104805	39.4237	2.3038	Green
13342	P13796	PLSL_HUMAN	Plastin 2 OS Homo sapiens GN LCP1 PE 1 SV 6	Regular	4224.95	0	70858.8	145	26	54	51.52	824440	191792	319671	47.5891	3.3721	Green	13343
11582	P55209	NP1L1_HUMAN	Nucleosome assembly protein 1 like 1 OS Homo sapiens GN NAP1L1 PE 1 SV 1	Regular	4140.05	0	45659.3	42	6	25	24.3	330392	284781	145000	70.6624	3.2264	Green	11585
12719	Q15365	PCBP1_HUMAN	Poly rC binding protein 1 OS Homo sapiens GN PCBP1 PE 1 SV 2	Regular	4049.74	0	38011.1	57	10	24	42.13	402920	238568	139059	59.1955	2.2501	Green	12720
753	Q92688	AN32B_HUMAN	Acidic leucine rich nuclear phosphoprotein 32 family member B OS Homo sapiens GN ANP32B PE 1 SV 1	Regular	4008.49	0	28958.8	43	8	14	24.3	302364	120900	134453	29.9988	0.8687	Green	752
6753	P63244	GBLP_HUMAN	Guanine nucleotide binding protein subunit beta 2 like 1 OS Homo sapiens GN GNB2L1 PE 1 SV 3	Regular	4004.33	0	35533	69	12	27	48.26	400591	170913	110714	42.4084	1.5069	Green
9184	P30613	KPYR_HUMAN	Pyruvate kinase isozymes R L OS Homo sapiens GN PKLR PE 1 SV 2	Regular	3945.48	0	62229.5	38	9	47	14.98	848974	6140.23	292202	1.5236	0.0948	Green	9183
17238	Q15185	TEBP_HUMAN	Prostaglandin E synthase 3 OS Homo sapiens GN PTGES3 PE 1 SV 1	Regular	3897.84	0	18982.6	42	6	15	45.63	394156	313805	89827	77.864	1.4781	Green
8129	P60842	IF4A1_HUMAN	Eukaryotic initiation factor 4A I OS Homo sapiens GN EIF4A1 PE 1 SV 1	Regular	3855.54	0	46382.2	94	20	46	49.01	555611	174585	196491	43.3196	2.0093	Green	8130 8131
17201	Q99832	TCPH_HUMAN	T complex protein 1 subunit eta OS Homo sapiens GN CCT7 PE 1 SV 2	Regular	3847.06	0	59880	88	17	43	42.54	445319	134867	160909	33.4643	2.0038	Green
17195	P53999	TCP4_HUMAN	Activated RNA polymerase II transcriptional coactivator p15 OS Homo sapiens GN SUB1 PE 1 SV 3	Regular	3845.55	0	14395.4	32	6	15	37.8	315782	251431	106206	62.3872	0.8981	Green
13673	P30041	PRDX6_HUMAN	Peroxiredoxin 6 OS Homo sapiens GN PRDX6 PE 1 SV 3	Regular	3834.46	0	25149.1	41	6	28	34.82	196299	131749	103891	32.6907	0.8221	Green
15076	P08865	RSSA_HUMAN	40S ribosomal protein SA OS Homo sapiens GN RPSA PE 1 SV 4	Regular	3775.31	0	32968.2	55	9	25	39.32	359907	231884	174217	57.537	1.8969	Green
15046	P46782	RS5_HUMAN	40S ribosomal protein S5 OS Homo sapiens GN RPS5 PE 1 SV 4	Regular	3731.2	0	23047.5	27	5	16	16.67	251832	209754	91561	52.0459	1.1995	Green
9511	P07864	LDHC_HUMAN	L lactate dehydrogenase C chain OS Homo sapiens GN LDHC PE 2 SV 4	Regular	3710.81	0	36653.5	30	6	27	14.46	1034989	514779	298840	127.731	4.6818	Green	9510 9509 9507
12929	P30086	PEBP1_HUMAN	Phosphatidylethanolamine binding protein 1 OS Homo sapiens GN PEBP1 PE 1 SV 3	Regular	3657.23	0	21170.9	44	7	13	59.36	189883	125000	93779	31.0161	0.6566	Green
9507	Q6ZMR3	LDH6A_HUMAN	L lactate dehydrogenase A like 6A OS Homo sapiens GN LDHAL6A PE 2 SV 1	Regular	3634.51	0	36849.6	23	3	24	8.43	765725	372283	251178	92.374	3.4039	Green	9510 9511 9509
18367	P62328	TYB4_HUMAN	Thymosin beta 4 OS Homo sapiens GN TMSB4X PE 1 SV 2	Regular	3633.28	0	5052.67	25	4	4	43.18	316829	230510	98786	57.1961	0.289	Green
12879	P30101	PDIA3_HUMAN	Protein disulfide isomerase A3 OS Homo sapiens GN PDIA3 PE 1 SV 4	Regular	3594.25	0	57181.6	100	19	49	44.16	781418	211074	250172	52.3735	2.9948	Green	12887
5094	P33316	DUT_HUMAN	Deoxyuridine 5 triphosphate nucleotidohydrolase mitochondrial OS Homo sapiens GN DUT PE 1 SV 4	Regular	3499.53	0	26848.4	32	6	18	33.33	204964	147477	80089	36.5933	0.9825	Green
6838	P52565	GDIR1_HUMAN	Rho GDP dissociation inhibitor 1 OS Homo sapiens GN ARHGDIA PE 1 SV 3	Regular	3480.91	0	23264.2	29	6	17	26.96	191054	110087	57725	27.3157	0.6355	Green
881	P08758	ANXA5_HUMAN	Annexin A5 OS Homo sapiens GN ANXA5 PE 1 SV 2	Regular	3391.02	0	35993.9	52	9	29	28.75	215748	138451	108882	34.3536	1.2365	Green
18431	P68036	UB2L3_HUMAN	Ubiquitin conjugating enzyme E2 L3 OS Homo sapiens GN UBE2L3 PE 1 SV 1	Regular	3388.77	0	18032.7	28	4	12	48.05	77092	72919	25189	18.0933	0.3263	Green
1703	Q9H3K6	BOLA2_HUMAN	BolA like protein 2 OS Homo sapiens GN BOLA2 PE 1 SV 1	Regular	3367.17	0	10287.6	16	3	10	51.16	45861	62466	14850	15.4996	0.1595	Green
14710	P05388	RLA0_HUMAN	60S acidic ribosomal protein P0 OS Homo sapiens GN RPLP0 PE 1 SV 1	Regular	3344.69	0	34444.7	51	7	20	28.39	200873	129987	114152	32.2535	1.111	Green
7028	P34896	GLYC_HUMAN	Serine hydroxymethyltransferase cytosolic OS Homo sapiens GN SHMT1 PE 1 SV 1	Regular	3252.34	0	53653	74	14	40	42.24	224917	75921	90263	18.8382	1.0107	Green
15018	P62277	RS13_HUMAN	40S ribosomal protein S13 OS Homo sapiens GN RPS13 PE 1 SV 2	Regular	3249.99	0	17222.3	18	5	13	23.18	94072	79085	21206	19.6232	0.338	Green
17200	P49368	TCPG_HUMAN	T complex protein 1 subunit gamma OS Homo sapiens GN CCT3 PE 1 SV 4	Regular	3167.56	0	61104.3	98	17	48	43.67	456020	191506	196443	47.5181	2.9036	Green	17065
16228	P30626	SORCN_HUMAN	Sorcin OS Homo sapiens GN SRI PE 1 SV 1	Regular	3112.2	0	21961.6	39	9	19	57.58	176954	95453	55207	23.6846	0.5202	Green
13981	P31939	PUR9_HUMAN	Bifunctional purine biosynthesis protein PURH OS Homo sapiens GN ATIC PE 1 SV 3	Regular	3103.66	0	65129.2	99	20	55	42.91	530643	121309	203423	30.1002	1.9604	Green
17204	P50990	TCPQ_HUMAN	T complex protein 1 subunit theta OS Homo sapiens GN CCT8 PE 1 SV 4	Regular	3098.94	0	60191	118	20	52	41.79	764216	210317	214047	52.1856	3.1411	Green
12810	P12004	PCNA_HUMAN	Proliferating cell nuclear antigen OS Homo sapiens GN PCNA PE 1 SV 1	Regular	3019.72	0	29111	34	8	23	34.1	249611	148101	89855	36.7481	1.0698	Green
18462	P61088	UBE2N_HUMAN	Ubiquitin conjugating enzyme E2 N OS Homo sapiens GN UBE2N PE 1 SV 1	Regular	2987.76	0	17194.9	24	6	13	41.45	132582	98290	34160	24.3886	0.4194	Green
7750	P26583	HMGB2_HUMAN	High mobility group protein B2 OS Homo sapiens GN HMGB2 PE 1 SV 2	Regular	2982.87	0	24204.9	38	7	17	21.05	235417	130616	62430	32.4094	0.7845	Green	7749
15037	P62857	RS28_HUMAN	40S ribosomal protein S28 OS Homo sapiens GN RPS28 PE 1 SV 1	Regular	2918.28	0	7898.07	15	2	6	30.43	115247	172870	46540	42.8941	0.3388	Green
8130	Q14240	IF4A2_HUMAN	Eukaryotic initiation factor 4A II OS Homo sapiens GN EIF4A2 PE 1 SV 2	Regular	2891	0	46630.5	57	11	50	27.76	315266	44244.3	102987	10.9783	0.5119	Green	8129 8131
6345	Q02790	FKBP4_HUMAN	Peptidyl prolyl cis trans isomerase FKBP4 OS Homo sapiens GN FKBP4 PE 1 SV 3	Regular	2829.46	0	52089.8	88	17	40	48.37	400413	176020	136254	43.6756	2.2751	Green
13979	P22234	PUR6_HUMAN	Multifunctional protein ADE2 OS Homo sapiens GN PAICS PE 1 SV 3	Regular	2825.7	0	47820.6	61	15	35	34.12	374810	128875	91240	31.9776	1.5292	Green
7709	P49773	HINT1_HUMAN	Histidine triad nucleotide binding protein 1 OS Homo sapiens GN HINT1 PE 1 SV 2	Regular	2813.73	0	13916	18	2	10	21.43	125780	188670	21825	46.8144	0.6515	Green
5229	P24534	EF1B_HUMAN	Elongation factor 1 beta OS Homo sapiens GN EEF1B2 PE 1 SV 3	Regular	2798.55	0	24934.8	27	6	19	25.78	190990	171190	77928	42.4771	1.0592	Green
15017	P25398	RS12_HUMAN	40S ribosomal protein S12 OS Homo sapiens GN RPS12 PE 1 SV 3	Regular	2788.92	0	14914.2	37	7	16	64.39	215571	158765	59180	39.3941	0.5875	Green
14671	P62829	RL23_HUMAN	60S ribosomal protein L23 OS Homo sapiens GN RPL23 PE 1 SV 1	Regular	2766.31	0	14979.5	12	4	13	38.57	89227	85695	41170	21.2634	0.3185	Green
7807	Q00839	HNRPU_HUMAN	Heterogeneous nuclear ribonucleoprotein U OS Homo sapiens GN HNRNPU PE 1 SV 6	Regular	2719.74	0	91325.9	82	17	55	24.48	850242	370426	239899	91.9133	8.3941	Green
7349	P11021	GRP78_HUMAN	78 kDa glucose regulated protein OS Homo sapiens GN HSPA5 PE 1 SV 2	Regular	2715.07	0	72447.1	50	10	52	15.44	396313	51147.2	155284	12.6911	0.9194	Green	7899 7894 7871
12882	Q15084	PDIA6_HUMAN	Protein disulfide isomerase A6 OS Homo sapiens GN PDIA6 PE 1 SV 1	Regular	2702.36	0	48520.6	64	14	35	36.59	333509	177417	102692	44.0222	2.136	Green	13299
18945	O75083	WDR1_HUMAN	WD repeat containing protein 1 OS Homo sapiens GN WDR1 PE 1 SV 4	Regular	2674.3	0	66877.9	74	14	43	33.66	349490	213783	100769	53.0457	3.5476	Green
12558	Q9UQ80	PA2G4_HUMAN	Proliferation associated protein 2G4 OS Homo sapiens GN PA2G4 PE 1 SV 3	Regular	2599.34	0	44129.1	65	18	32	49.49	457081	179929	101479	44.6455	1.9702	Green
12720	Q15366	PCBP2_HUMAN	Poly rC binding protein 2 OS Homo sapiens GN PCBP2 PE 1 SV 1	Regular	2563.6	0	38979.4	48	9	24	45.21	292400	135812	109709	33.6988	1.3136	Green	12719
16650	P31948	STIP1_HUMAN	Stress induced phosphoprotein 1 OS Homo sapiens GN STIP1 PE 1 SV 1	Regular	2546.6	0	63266.7	82	19	64	32.23	470185	159170	152652	39.4946	2.4987	Green
6837	P50395	GDIB_HUMAN	Rab GDP dissociation inhibitor beta OS Homo sapiens GN GDI2 PE 1 SV 2	Regular	2489.95	0	51119.6	78	17	42	44.27	333083	153037	121617	37.9728	1.9412	Green
19126	P12956	XRCC6_HUMAN	X ray repair cross complementing protein 6 OS Homo sapiens GN XRCC6 PE 1 SV 2	Regular	2488.9	0	70128.3	68	17	56	33.5	338601	163247	103374	40.5062	2.8406	Green
7512	P62805	H4_HUMAN	Histone H4 OS Homo sapiens GN HIST1H4A PE 1 SV 2	Regular	2439.21	0	11367.4	18	4	11	32.04	139414	134543	35175	33.384	0.3795	Green
5669	P15311	EZRI_HUMAN	Ezrin OS Homo sapiens GN EZR PE 1 SV 4	Regular	2436.35	0	69527	88	20	74	29.86	614490	97364.8	199390	24.159	1.6797	Green	10632 28927 4503 5310 19578 14158 31433 38376 2766 10929 33460
17494	P29401	TKT_HUMAN	Transketolase OS Homo sapiens GN TKT PE 1 SV 3	Regular	2396.69	0	68562.1	78	12	42	27.13	572008	222255	173276	55.1478	3.781	Green
8317	Q12905	ILF2_HUMAN	Interleukin enhancer binding factor 2 OS Homo sapiens GN ILF2 PE 1 SV 2	Regular	2383.6	0	43290.3	31	8	26	31.79	362014	110907	136383	27.5192	1.1913	Green
7805	O60506	HNRPQ_HUMAN	Heterogeneous nuclear ribonucleoprotein Q OS Homo sapiens GN SYNCRIP PE 1 SV 2	Regular	2343.15	0	69830.8	90	19	50	35.47	447896	142947	211267	35.4692	2.4768	Green	7806
336	P53396	ACLY_HUMAN	ATP citrate synthase OS Homo sapiens GN ACLY PE 1 SV 3	Regular	2329.07	0	121752	145	30	92	30.52	667176	155425	192974	38.5654	4.6954	Green
10967	P35579	MYH9_HUMAN	Myosin 9 OS Homo sapiens GN MYH9 PE 1 SV 4	Regular	2291.49	0	227787	312	62	164	34.23	1206653	172992	488325	42.9244	9.7776	Green	10962 10961 10966 10955 10956 10957 10960 10954
17110	O75347	TBCA_HUMAN	Tubulin specific chaperone A OS Homo sapiens GN TBCA PE 1 SV 3	Regular	2246.33	0	12911.9	28	6	12	46.3	121857	98322	35159	24.3965	0.315	Green
9522	P09382	LEG1_HUMAN	Galectin 1 OS Homo sapiens GN LGALS1 PE 1 SV 2	Regular	2197.99	0	15057.9	29	6	14	37.04	150328	110900	42988	27.5175	0.4144	Green
5231	P29692	EF1D_HUMAN	Elongation factor 1 delta OS Homo sapiens GN EEF1D PE 1 SV 5	Regular	2135.77	0	31235.9	42	10	26	38.08	165625	106153	91920	26.3396	0.8227	Green
8335	P12268	IMDH2_HUMAN	Inosine 5 monophosphate dehydrogenase 2 OS Homo sapiens GN IMPDH2 PE 1 SV 2	Regular	2104.93	0	56261.3	90	14	41	31.52	407908	156884	125655	38.9274	2.1901	Green
7896	P34932	HSP74_HUMAN	Heat shock 70 kDa protein 4 OS Homo sapiens GN HSPA4 PE 1 SV 4	Regular	2096.61	0	95186.5	86	19	74	30.83	294397	109896	126359	27.2683	2.5956	Green
7486	P0C0S5	H2AZ_HUMAN	Histone H2A Z OS Homo sapiens GN H2AFZ PE 1 SV 2	Regular	2066.53	0	13552.8	18	4	7	20.31	310629	2075.09	64027	0.5149	0.007	Green	7473
17199	P48643	TCPE_HUMAN	T complex protein 1 subunit epsilon OS Homo sapiens GN CCT5 PE 1 SV 1	Regular	2061.98	0	60127.4	66	16	49	43.07	373327	130441	87271	32.3661	1.9461	Green
5439	P14625	ENPL_HUMAN	Endoplasmin OS Homo sapiens GN HSP90B1 PE 1 SV 1	Regular	2011.15	0	92754.2	70	16	82	22.17	520737	114047	161176	28.2983	2.6248	Green	7516 7877
15742	Q01105	SET_HUMAN	Protein SET OS Homo sapiens GN SET PE 1 SV 3	Regular	2003.04	0	33488.9	25	6	17	15.52	202660	192259	71683	47.7049	1.5976	Green
11792	P19338	NUCL_HUMAN	Nucleolin OS Homo sapiens GN NCL PE 1 SV 3	Regular	1972.79	0	76671.5	95	22	59	29.44	588324	175599	202470	43.5711	3.3407	Green
17076	Q9H4B7	TBB1_HUMAN	Tubulin beta 1 chain OS Homo sapiens GN TUBB1 PE 1 SV 1	Regular	1971.16	0	50897.3	38	9	31	20.4	147351	11959	66912	2.9674	0.151	Green	17082 17077 17081
7506	Q16695	H31T_HUMAN	Histone H3 1t OS Homo sapiens GN HIST3H3 PE 1 SV 3	Regular	1942.43	0	15622.3	22	4	12	21.32	141748	119130	55645	29.5596	0.4618	Green	7509
7509	P84243	H33_HUMAN	Histone H3 3 OS Homo sapiens GN H3F3A PE 1 SV 2	Regular	1942.43	0	15385	22	5	12	21.32	143012	0	55945			Green	7506
6118	P49327	FAS_HUMAN	Fatty acid synthase OS Homo sapiens GN FASN PE 1 SV 3	Regular	1879.6	0	276050	311	62	178	29.75	1423997	218005	530577	54.0933	14.9325	Green
7801	P52597	HNRPF_HUMAN	Heterogeneous nuclear ribonucleoprotein F OS Homo sapiens GN HNRNPF PE 1 SV 3	Regular	1824.29	0	46014.1	38	6	26	25.3	132800	41758.3	53014	10.3614	0.4768	Green	7794 7793
5107	O00148	DX39A_HUMAN	ATP dependent RNA helicase DDX39A OS Homo sapiens GN DDX39A PE 1 SV 2	Regular	1813.73	0	49642.9	74	15	37	37	270896	103397	80739	25.6557	1.2736	Green
2086	P27797	CALR_HUMAN	Calreticulin OS Homo sapiens GN CALR PE 1 SV 1	Regular	1804.45	0	48312.7	51	8	47	26.62	254472	184804	55641	45.8551	2.2154	Green
17208	P40227	TCPZ_HUMAN	T complex protein 1 subunit zeta OS Homo sapiens GN CCT6A PE 1 SV 3	Regular	1793.45	0	58480.5	42	9	41	20.9	195971	92139.8	78637	22.8625	1.337	Green	17207
145	P52209	6PGD_HUMAN	6 phosphogluconate dehydrogenase decarboxylating OS Homo sapiens GN PGD PE 1 SV 3	Regular	1725.08	0	53653.3	55	12	36	30.02	315091	135138	126277	33.5316	1.7991	Green
7793	P31943	HNRH1_HUMAN	Heterogeneous nuclear ribonucleoprotein H OS Homo sapiens GN HNRNPH1 PE 1 SV 4	Regular	1664.64	0	49514.7	41	9	27	22.27	269367	170881	63102	42.4004	2.0994	Green	7794 7801
14158	P35241	RADI_HUMAN	Radixin OS Homo sapiens GN RDX PE 1 SV 1	Regular	1657.43	0	68678.1	68	16	61	20.93	530677	42371.3	149384	10.5135	0.722	Green	10632 28927 20996 4503 5310 19578 31433 38881 5669 2766 38376 10929 33460
17196	P17987	TCPA_HUMAN	T complex protein 1 subunit alpha OS Homo sapiens GN TCP1 PE 1 SV 1	Regular	1649.12	0	60856.9	67	14	46	27.7	440838	187780	122923	46.5936	2.8355	Green
8333	Q14974	IMB1_HUMAN	Importin subunit beta 1 OS Homo sapiens GN KPNB1 PE 1 SV 2	Regular	1630.35	0	98482	82	17	62	25.91	411522	142423	158513	35.3392	3.4803	Green
4986	Q16555	DPYL2_HUMAN	Dihydropyrimidinase related protein 2 OS Homo sapiens GN DPYSL2 PE 1 SV 1	Regular	1595.05	0	62749.9	74	16	43	40.73	313049	115578	111464	28.6782	1.7996	Green	4985
18422	P61077	UB2D3_HUMAN	Ubiquitin conjugating enzyme E2 D3 OS Homo sapiens GN UBE2D3 PE 1 SV 1	Regular	1509.89	0	16915.3	8	1	8	16.33	14266	42798	10005	10.6194	0.1796	Green
12604	Q8NC51	PAIRB_HUMAN	Plasminogen activator inhibitor 1 RNA binding protein OS Homo sapiens GN SERBP1 PE 1 SV 2	Regular	1492.36	0	45022.5	48	9	40	23.04	164345	97432	76923	24.1757	1.0884	Green
5232	P26641	EF1G_HUMAN	Elongation factor 1 gamma OS Homo sapiens GN EEF1G PE 1 SV 3	Regular	1476.82	0	50461	68	17	37	35.7	386698	135914	109475	33.7241	1.7018	Green
16669	P16949	STMN1_HUMAN	Stathmin OS Homo sapiens GN STMN1 PE 1 SV 3	Regular	1459.99	0	17302.5	29	7	24	49.66	221687	143770	49665	35.6734	0.6172	Green
10298	P40926	MDHM_HUMAN	Malate dehydrogenase mitochondrial OS Homo sapiens GN MDH2 PE 1 SV 3	Regular	1420.27	0	35959.6	38	9	28	39.35	160175	85377	55915	21.1845	0.7618	Green
15422	Q9UBE0	SAE1_HUMAN	SUMO activating enzyme subunit 1 OS Homo sapiens GN SAE1 PE 1 SV 1	Regular	1387.31	0	38906.1	19	5	31	17.63	82962	15912	21585	3.9482	0.1536	Green
15048	P62081	RS7_HUMAN	40S ribosomal protein S7 OS Homo sapiens GN RPS7 PE 1 SV 1	Regular	1383.43	0	22126.9	18	3	21	21.13	91764	91764	18274	22.7693	0.5038	Green
13810	P25786	PSA1_HUMAN	Proteasome subunit alpha type 1 OS Homo sapiens GN PSMA1 PE 1 SV 1	Regular	1342.65	0	29840.8	40	11	25	38.78	135020	62648	53113	15.5448	0.4639	Green
8765	Q01813	K6PP_HUMAN	6 phosphofructokinase type C OS Homo sapiens GN PFKP PE 1 SV 2	Regular	1336.46	0	86508.7	60	17	51	20.41	238149	76456	90402	18.9709	1.6411	Green	8764
10398	P31153	METK2_HUMAN	S adenosylmethionine synthase isoform type 2 OS Homo sapiens GN MAT2A PE 1 SV 1	Regular	1328.39	0	44002.9	32	5	33	17.72	147388	104225	41437	25.8612	1.138	Green
15152	Q9Y265	RUVB1_HUMAN	RuvB like 1 OS Homo sapiens GN RUVBL1 PE 1 SV 1	Regular	1302.68	0	50570.3	47	13	34	36.62	150327	61088	47057	15.1577	0.7665	Green
11585	Q99733	NP1L4_HUMAN	Nucleosome assembly protein 1 like 4 OS Homo sapiens GN NAP1L4 PE 1 SV 1	Regular	1288.28	0	42994.6	32	7	23	17.07	107101	43457	52134	10.7829	0.4636	Green	11582
15025	P62269	RS18_HUMAN	40S ribosomal protein S18 OS Homo sapiens GN RPS18 PE 1 SV 3	Regular	1271.4	0	17718.7	28	7	16	38.16	193106	128290	42597	31.8324	0.564	Green
10974	P60660	MYL6_HUMAN	Myosin light polypeptide 6 OS Homo sapiens GN MYL6 PE 1 SV 2	Regular	1268.64	0	17101.2	22	6	14	34.44	197237	123951	39926	30.7558	0.526	Green
7466	P22492	H1T_HUMAN	Histone H1t OS Homo sapiens GN HIST1H1T PE 1 SV 4	Regular	1260.5	0	22019	26	5	15	11.59	268845	17399.8	48196	4.3174	0.0951	Green	7457
13886	P26599	PTBP1_HUMAN	Polypyrimidine tract binding protein 1 OS Homo sapiens GN PTBP1 PE 1 SV 1	Regular	1255.45	0	57392.5	40	9	34	24.86	130433	93822	48722	23.2799	1.3361	Green
14701	P36578	RL4_HUMAN	60S ribosomal protein L4 OS Homo sapiens GN RPL4 PE 1 SV 5	Regular	1251.61	0	47982.5	59	12	34	29.51	288952	94559	79062	23.4628	1.1258	Green
14706	P18124	RL7_HUMAN	60S ribosomal protein L7 OS Homo sapiens GN RPL7 PE 1 SV 1	Regular	1249.9	0	29282.9	29	7	20	22.58	76528	60013	32639	14.8909	0.436	Green
10192	Q9NZL9	MAT2B_HUMAN	Methionine adenosyltransferase 2 subunit beta OS Homo sapiens GN MAT2B PE 1 SV 1	Regular	1242.99	0	37894	33	8	30	30.24	116335	59104	43826	14.6654	0.5557	Green
16306	P35237	SPB6_HUMAN	Serpin B6 OS Homo sapiens GN SERPINB6 PE 1 SV 3	Regular	1241.79	0	42964.2	53	14	27	32.45	184695	92686	72010	22.998	0.9881	Green
13864	Q06323	PSME1_HUMAN	Proteasome activator complex subunit 1 OS Homo sapiens GN PSME1 PE 1 SV 1	Regular	1197.63	0	28894.2	35	7	26	25.3	264702	180535	102236	44.7959	1.2943	Green
664	P15121	ALDR_HUMAN	Aldose reductase OS Homo sapiens GN AKR1B1 PE 1 SV 3	Regular	1148.33	0	36252.6	29	7	22	31.01	150619	105485	31684	26.1738	0.9489	Green
13814	P28066	PSA5_HUMAN	Proteasome subunit alpha type 5 OS Homo sapiens GN PSMA5 PE 1 SV 3	Regular	1136.52	0	26582.2	25	6	16	31.95	126267	103930	43700	25.788	0.6855	Green
15039	P15880	RS2_HUMAN	40S ribosomal protein S2 OS Homo sapiens GN RPS2 PE 1 SV 2	Regular	1107.29	0	31609.6	28	5	27	17.41	195472	131723	27885	32.6842	1.0331	Green
11102	P43490	NAMPT_HUMAN	Nicotinamide phosphoribosyltransferase OS Homo sapiens GN NAMPT PE 1 SV 1	Regular	1083.74	0	55806.3	48	12	47	18.94	307891	107029	88360	26.5569	1.482	Green
19125	P13010	XRCC5_HUMAN	X ray repair cross complementing protein 5 OS Homo sapiens GN XRCC5 PE 1 SV 3	Regular	1078.99	0	83275	64	15	62	25.27	334059	150400	87217	37.3185	3.1077	Green
1864	P11586	C1TC_HUMAN	C 1 tetrahydrofolate synthase cytoplasmic OS Homo sapiens GN MTHFD1 PE 1 SV 3	Regular	1068.7	0	102244	73	18	73	28.98	367634	150026	92203	37.2257	3.8061	Green
8440	Q15181	IPYR_HUMAN	Inorganic pyrophosphatase OS Homo sapiens GN PPA1 PE 1 SV 2	Regular	1067.19	0	33116.3	28	9	26	39.79	176382	92887	37881	23.0479	0.7633	Green
5533	P15170	ERF3A_HUMAN	Eukaryotic peptide chain release factor GTP binding subunit ERF3A OS Homo sapiens GN GSPT1 PE 1 SV 1	Regular	1066.98	0	56383.3	22	8	47	24.65	42988	30049	20260	7.456	0.4204	Green
14675	P46776	RL27A_HUMAN	60S ribosomal protein L27a OS Homo sapiens GN RPL27A PE 1 SV 2	Regular	1058.95	0	16675.5	10	3	7	16.22	64586	92928	39969	23.0581	0.3845	Green
13343	P13797	PLST_HUMAN	Plastin 3 OS Homo sapiens GN PLS3 PE 1 SV 4	Regular	1026.26	0	71324.4	37	11	56	10.95	213475	31425.1	105226	7.7975	0.5561	Green	13342
662	P05062	ALDOB_HUMAN	Fructose bisphosphate aldolase B OS Homo sapiens GN ALDOB PE 1 SV 2	Regular	1017.24	0	39986.3	20	5	31	20.05	200064	6408.53	48928	1.5901	0.0636	Green	663 661
13865	Q9UL46	PSME2_HUMAN	Proteasome activator complex subunit 2 OS Homo sapiens GN PSME2 PE 1 SV 4	Regular	1009.87	0	27572.8	42	9	21	33.05	136686	61068	59352	15.1527	0.4178	Green
8131	P38919	IF4A3_HUMAN	Eukaryotic initiation factor 4A III OS Homo sapiens GN EIF4A3 PE 1 SV 4	Regular	1007.47	0	47156.3	41	9	48	24.09	153318	29772.4	48173	7.3874	0.3484	Green	8130 8129
13918	P06454	PTMA_HUMAN	Prothymosin alpha OS Homo sapiens GN PTMA PE 1 SV 2	Regular	1006.53	0	12203	12	3	10	21.62	40467	40467	15066	10.041	0.1225	Green
10546	P19105	ML12A_HUMAN	Myosin regulatory light chain 12A OS Homo sapiens GN MYL12A PE 1 SV 2	Regular	958.759	0	19851.2	23	8	19	39.18	197129	96817	48354	24.0231	0.4769	Green	9166
13815	P60900	PSA6_HUMAN	Proteasome subunit alpha type 6 OS Homo sapiens GN PSMA6 PE 1 SV 1	Regular	958.583	0	27855.7	32	7	20	20.73	165854	54139	49900	13.4334	0.3742	Green
4368	P99999	CYC_HUMAN	Cytochrome c OS Homo sapiens GN CYCS PE 1 SV 2	Regular	924.773	0	11862.8	20	5	10	31.43	89880	73601	28627	18.2625	0.2166	Green
14343	P54727	RD23B_HUMAN	UV excision repair protein RAD23 homolog B OS Homo sapiens GN RAD23B PE 1 SV 1	Regular	921.791	0	43228.3	24	6	20	11.98	94916	66311	34273	16.4537	0.7113	Green
241	P61221	ABCE1_HUMAN	ATP binding cassette sub family E member 1 OS Homo sapiens GN ABCE1 PE 1 SV 1	Regular	876.049	0	68283.9	45	12	43	17.36	113772	53157	71747	13.1898	0.9006	Green
10368	Q9BQA1	MEP50_HUMAN	Methylosome protein 50 OS Homo sapiens GN WDR77 PE 1 SV 1	Regular	874.103	0	37465.8	15	5	23	27.49	44267	39730.5	18225	9.8583	0.3693	Green
14702	P46777	RL5_HUMAN	60S ribosomal protein L5 OS Homo sapiens GN RPL5 PE 1 SV 3	Regular	871.36	0	34590.8	31	8	23	27.95	142520	74917	29961	18.589	0.643	Green
10161	P29966	MARCS_HUMAN	Myristoylated alanine rich C kinase substrate OS Homo sapiens GN MARCKS PE 1 SV 4	Regular	864.762	0	31725.8	24	8	19	31.02	70182	44369	43876	11.0092	0.3493	Green
5163	O43491	E41L2_HUMAN	Band 4 1 like protein 2 OS Homo sapiens GN EPB41L2 PE 1 SV 1	Regular	824.647	0	113101	74	17	108	20.5	264989	108447	103387	26.9088	3.0434	Green	5164
14294	Q9Y5S9	RBM8A_HUMAN	RNA binding protein 8A OS Homo sapiens GN RBM8A PE 1 SV 1	Regular	817.111	0	19946.1	11	2	12	15.52	21368	32052	7919	7.953	0.1586	Green
9653	P09960	LKHA4_HUMAN	Leukotriene A 4 hydrolase OS Homo sapiens GN LTA4H PE 1 SV 2	Regular	810.073	0	69912.7	46	12	54	24.06	150339	78908	78402	19.5793	1.3688	Green
14663	Q02543	RL18A_HUMAN	60S ribosomal protein L18a OS Homo sapiens GN RPL18A PE 1 SV 2	Regular	798.29	0	21047.5	12	3	19	11.36	31943	38932.5	16523	9.6603	0.2033	Green
7794	P55795	HNRH2_HUMAN	Heterogeneous nuclear ribonucleoprotein H2 OS Homo sapiens GN HNRNPH2 PE 1 SV 1	Regular	794.192	0	49548.8	28	7	27	20.27	131993	5017.23	46296	1.2449	0.0617	Green	7801 7793
7806	O43390	HNRPR_HUMAN	Heterogeneous nuclear ribonucleoprotein R OS Homo sapiens GN HNRNPR PE 1 SV 1	Regular	760.299	0	71228.3	29	7	51	10.11	143888	70303.8	48009	17.4444	1.2425	Green	7805
13833	O00231	PSD11_HUMAN	26S proteasome non ATPase regulatory subunit 11 OS Homo sapiens GN PSMD11 PE 1 SV 3	Regular	746.706	0	47749	28	8	38	17.54	125341	67811	31293	16.8258	0.8034	Green
203	P00505	AATM_HUMAN	Aspartate aminotransferase mitochondrial OS Homo sapiens GN GOT2 PE 1 SV 3	Regular	730.371	0	47916.9	36	12	45	27.91	106362	51468	45876	12.7707	0.6119	Green
18406	Q15029	U5S1_HUMAN	116 kDa U5 small nuclear ribonucleoprotein component OS Homo sapiens GN EFTUD2 PE 1 SV 1	Regular	726.051	0	110405	38	13	73	12.45	232453	65295.3	71014	16.2016	1.7887	Green	5234
18668	Q86UX7	URP2_HUMAN	Fermitin family homolog 3 OS Homo sapiens GN FERMT3 PE 1 SV 1	Regular	703.85	0	76523.2	27	12	45	14.24	124561	50507	49133	12.5322	0.959	Green
15429	P23526	SAHH_HUMAN	Adenosylhomocysteinase OS Homo sapiens GN AHCY PE 1 SV 4	Regular	702.328	0	48286.5	50	12	31	26.62	226361	96280	62613	23.8898	1.1536	Green
14698	P39023	RL3_HUMAN	60S ribosomal protein L3 OS Homo sapiens GN RPL3 PE 1 SV 2	Regular	686.566	0	46394.1	28	9	35	19.85	106625	60061	29798	14.9029	0.6914	Green
8769	P54819	KAD2_HUMAN	Adenylate kinase 2 mitochondrial OS Homo sapiens GN AK2 PE 1 SV 2	Regular	683.707	0	26705.9	21	7	24	11.3	133642	81289.5	39655	20.1702	0.5387	Green
810	Q99873	ANM1_HUMAN	Protein arginine N methyltransferase 1 OS Homo sapiens GN PRMT1 PE 1 SV 2	Regular	655.088	0	42085.9	29	7	31	23.27	163139	78664	35231	19.5188	0.8215	Green
12551	P47712	PA24A_HUMAN	Cytosolic phospholipase A2 OS Homo sapiens GN PLA2G4A PE 1 SV 2	Regular	650.283	0	85752.4	49	12	61	15.49	216940	83516	64726	20.7227	1.777	Green	26718
12880	P13667	PDIA4_HUMAN	Protein disulfide isomerase A4 OS Homo sapiens GN PDIA4 PE 1 SV 2	Regular	650.236	0	73274.7	38	12	69	13.02	159451	70455	68555	17.4819	1.281	Green	40463
11067	Q13765	NACA_HUMAN	Nascent polypeptide associated complex subunit alpha OS Homo sapiens GN NACA PE 1 SV 1	Regular	633.032	0	23383.9	13	2	8	12.56	77853	116780	40465	28.9763	0.6776	Green
6538	Q96AE4	FUBP1_HUMAN	Far upstream element binding protein 1 OS Homo sapiens GN FUBP1 PE 1 SV 3	Regular	623.872	0	67731.6	38	8	45	21.27	118781	66592	44177	16.5234	1.1192	Green
12673	P09874	PARP1_HUMAN	Poly ADP ribose polymerase 1 OS Homo sapiens GN PARP1 PE 1 SV 4	Regular	608.087	0	113882	54	17	83	14.5	202512	67695	68146	16.7971	1.9129	Green	18732
16779	P49588	SYAC_HUMAN	Alanine tRNA ligase cytoplasmic OS Homo sapiens GN AARS PE 1 SV 2	Regular	589.64	0	107552	48	15	82	15.29	152756	41969	48556	10.4137	1.12	Green
4365	Q9HB71	CYBP_HUMAN	Calcyclin binding protein OS Homo sapiens GN CACYBP PE 1 SV 2	Regular	588.71	0	26324	30	7	24	36.84	143501	87006	39680	21.5887	0.5683	Green
16846	P49591	SYSC_HUMAN	Serine tRNA ligase cytoplasmic OS Homo sapiens GN SARS PE 1 SV 3	Regular	588.549	0	59290.6	44	10	45	20.82	167715	76887	52475	19.0779	1.1311	Green
7749	P09429	HMGB1_HUMAN	High mobility group protein B1 OS Homo sapiens GN HMGB1 PE 1 SV 3	Regular	582.414	0	25064.9	51	9	17	28.84	295754	42079.5	75627	10.4411	0.2617	Green	7750
17029	Q9UI15	TAGL3_HUMAN	Transgelin 3 OS Homo sapiens GN TAGLN3 PE 1 SV 2	Regular	579.102	0	22643.8	19	4	18	18.09	42009	1106.04	19184	0.2744	0.0062	Green	17028
17506	Q9Y490	TLN1_HUMAN	Talin 1 OS Homo sapiens GN TLN1 PE 1 SV 3	Regular	576.614	0	271935	134	42	208	16.65	418880	105634	169667	26.2108	7.1276	Green	17507
12877	P07237	PDIA1_HUMAN	Protein disulfide isomerase OS Homo sapiens GN P4HB PE 1 SV 3	Regular	574.1	0	57515.6	23	4	50	12.01	91750	75942	40554	18.8434	1.0838	Yellow
10954	P35580	MYH10_HUMAN	Myosin 10 OS Homo sapiens GN MYH10 PE 1 SV 3	Regular	560.456	0	229969	91	30	164	7.84	362505	13708.5	136195	3.4015	0.7822	Green	10962 10961 16217 10966 10955 10957 10960 10967 10956
14889	P51991	ROA3_HUMAN	Heterogeneous nuclear ribonucleoprotein A3 OS Homo sapiens GN HNRNPA3 PE 1 SV 2	Regular	560.292	0	39823.1	25	9	32	20.63	143059	88701	25483	22.0092	0.8765	Green	14887
16120	Q7KZF4	SND1_HUMAN	Staphylococcal nuclease domain containing protein 1 OS Homo sapiens GN SND1 PE 1 SV 1	Regular	550.343	0	102681	49	16	83	15.05	246844	91701	55419	22.7536	2.3364	Green
8318	Q12906	ILF3_HUMAN	Interleukin enhancer binding factor 3 OS Homo sapiens GN ILF3 PE 1 SV 3	Regular	548.328	0	95737.7	34	13	57	13.76	194196	78317	60670	19.4327	1.8604	Green	16687
86	P30153	2AAA_HUMAN	Serine threonine protein phosphatase 2A 65 kDa regulatory subunit A alpha isoform OS Homo sapiens GN	Regular	546.436	0	66107.1	40	10	50	16.81	111380	75539	77211	18.7434	1.2391	Green
17207	Q92526	TCPW_HUMAN	T complex protein 1 subunit zeta 2 OS Homo sapiens GN CCT6B PE 1 SV 5	Regular	545.423	0	58391.8	27	10	37	13.58	148168	69230.6	47726	17.1781	1.0031	Green	17208
13973	Q9UHX1	PUF60_HUMAN	Poly U binding splicing factor PUF60 OS Homo sapiens GN PUF60 PE 1 SV 1	Regular	519.436	0	60046.7	24	8	31	20.21	40580	22475	15484	5.5767	0.3349	Yellow
6971	Q04446	GLGB_HUMAN	1 4 alpha glucan branching enzyme OS Homo sapiens GN GBE1 PE 1 SV 3	Regular	515.353	0	80930.3	37	13	47	19.23	146944	64422	24843	15.9849	1.2937	Yellow
3054	Q9Y2V2	CHSP1_HUMAN	Calcium regulated heat stable protein 1 OS Homo sapiens GN CARHSP1 PE 1 SV 2	Regular	507.473	0.41	16120.2	9	2	10	18.37	34864	52296	6773	12.9761	0.2092	Yellow
10955	P35749	MYH11_HUMAN	Myosin 11 OS Homo sapiens GN MYH11 PE 1 SV 3	Regular	500.217	0.41	228195	70	28	161	6.29	310071	1986.84	99948	0.493	0.1125	Green	10962 10961 10966 10956 10957 10960 10954 10967
1320	Q9NT62	ATG3_HUMAN	Ubiquitin like conjugating enzyme ATG3 OS Homo sapiens GN ATG3 PE 1 SV 1	Regular	496.018	0.41	36320.7	10	2	24	8.28	16607	24910.5	10152	6.181	0.2245	Yellow
7596	P51858	HDGF_HUMAN	Hepatoma derived growth factor OS Homo sapiens GN HDGF PE 1 SV 1	Regular	490.835	0.4	26902.4	25	7	30	33.75	95982	49018	45408	12.1628	0.3272	Yellow
8327	P52292	IMA2_HUMAN	Importin subunit alpha 2 OS Homo sapiens GN KPNA2 PE 1 SV 1	Regular	482.241	0.4	58204.2	21	6	36	9.07	217307	36369	22327	9.0242	0.5252	Green
14703	Q02878	RL6_HUMAN	60S ribosomal protein L6 OS Homo sapiens GN RPL6 PE 1 SV 3	Regular	479.685	0.4	32785	25	7	24	23.26	154416	92326	21461	22.9087	0.7511	Yellow
10517	P28482	MK01_HUMAN	Mitogen activated protein kinase 1 OS Homo sapiens GN MAPK1 PE 1 SV 3	Regular	477.7	0.4	41789	36	10	28	19.44	162457	55764	47248	13.8366	0.5782	Green	10518 13020 23247
10270	P33993	MCM7_HUMAN	DNA replication licensing factor MCM7 OS Homo sapiens GN MCM7 PE 1 SV 4	Regular	472.173	0.4	81935.4	25	13	66	21.14	127125	57393	37075	14.2408	1.1668	Green
11156	Q5TAG4	NBPFC_HUMAN	Neuroblastoma breakpoint family member 12 OS Homo sapiens GN NBPF12 PE 2 SV 2	Regular	470.479	0.4	31763.2	7	2	20	9.67	6188	5186.71	5061	1.287	0.0409	Green	11146
14674	P61254	RL26_HUMAN	60S ribosomal protein L26 OS Homo sapiens GN RPL26 PE 1 SV 1	Regular	468.985	0.4	17258.2	9	3	11	15.86	38947	50067	9692	12.4231	0.2144	Yellow
8428	O95373	IPO7_HUMAN	Importin 7 OS Homo sapiens GN IPO7 PE 1 SV 1	Regular	468.475	0.39	120828	40	10	69	11.08	171173	80323	59169	19.9304	2.4082	Green
15706	O43175	SERA_HUMAN	D 3 phosphoglycerate dehydrogenase OS Homo sapiens GN PHGDH PE 1 SV 4	Regular	465.869	0.39	57392	33	10	36	13.7	72499	37032	36283	9.1887	0.5274	Green
16812	Q15046	SYK_HUMAN	Lysine tRNA ligase OS Homo sapiens GN KARS PE 1 SV 3	Regular	461.535	0.39	68504.4	24	10	45	15.08	145413	104327	34933	25.8865	1.7733	Yellow
11146	Q3BBV0	NBPF1_HUMAN	Neuroblastoma breakpoint family member 1 OS Homo sapiens GN NBPF1 PE 2 SV 1	Regular	458.411	0.39	141111	11	3	94	2.31	15895	12915.2	14733	3.2046	0.4522	Green	11156
14654	Q96L21	RL10L_HUMAN	60S ribosomal protein L10 like OS Homo sapiens GN RPL10L PE 1 SV 3	Regular	455.551	0.39	24975	11	2	14	6.54	25704	30274.5	6650	7.512	0.1876	Green
8122	P20042	IF2B_HUMAN	Eukaryotic translation initiation factor 2 subunit 2 OS Homo sapiens GN EIF2S2 PE 1 SV 2	Regular	455.386	0.39	38730.6	11	4	43	20.12	28055	23561	12191	5.8462	0.2264	Yellow
16876	P26640	SYVC_HUMAN	Valine tRNA ligase OS Homo sapiens GN VARS PE 1 SV 4	Regular	440.662	0.38	141731	52	14	90	11.63	193242	57233	66147	14.2011	2.0127	Green
4583	Q92499	DDX1_HUMAN	ATP dependent RNA helicase DDX1 OS Homo sapiens GN DDX1 PE 1 SV 2	Regular	438.083	0.38	83401.7	31	9	63	12.43	114346	86659	20490	21.5026	1.7934	Green
8764	P17858	K6PL_HUMAN	6 phosphofructokinase liver type OS Homo sapiens GN PFKL PE 1 SV 6	Regular	425.247	0.76	85817	42	13	51	17.69	75590	28765	45552	7.1374	0.6125	Yellow	8765
13518	P48147	PPCE_HUMAN	Prolyl endopeptidase OS Homo sapiens GN PREP PE 1 SV 2	Regular	415.224	0.76	81612.1	23	10	62	5.21	92120	41246	38009	10.2343	0.8352	Green
8427	O00410	IPO5_HUMAN	Importin 5 OS Homo sapiens GN IPO5 PE 1 SV 4	Regular	411.777	0.75	125113	43	14	78	10.94	94760	48561	62634	12.0494	1.5075	Yellow	14840
347	P21399	ACOC_HUMAN	Cytoplasmic aconitate hydratase OS Homo sapiens GN ACO1 PE 1 SV 3	Regular	403.46	0.75	98912.3	26	7	67	9.79	84655	26320	22275	6.5307	0.646	Yellow
10267	P33991	MCM4_HUMAN	DNA replication licensing factor MCM4 OS Homo sapiens GN MCM4 PE 1 SV 5	Regular	400.197	0.75	97128.4	28	12	69	12.86	66759	37984	25558	9.4249	0.9154	Green
1701	Q9UMX3	BOK_HUMAN	Bcl 2 related ovarian killer protein OS Homo sapiens GN BOK PE 2 SV 1	Regular	396.565	0.75	23565.4	17	5	18	23.11	54213	48985	14333	12.1546	0.2864	Yellow
11508	P30419	NMT1_HUMAN	Glycylpeptide N tetradecanoyltransferase 1 OS Homo sapiens GN NMT1 PE 1 SV 2	Regular	387.996	0.74	57148.5	25	9	31	18.95	109117	31610	34279	7.8433	0.4482	Yellow
11122	P49321	NASP_HUMAN	Nuclear autoantigenic sperm protein OS Homo sapiens GN NASP PE 1 SV 2	Regular	382.469	0.74	85523	32	8	78	10.79	122741	96671	71018	23.9868	2.0514	Green
16866	P26639	SYTC_HUMAN	Threonine tRNA ligase cytoplasmic OS Homo sapiens GN TARS PE 1 SV 3	Regular	373.279	0.74	84347.7	31	9	58	14.11	81970	47998	31873	11.9097	1.0046	Yellow
13671	Q13162	PRDX4_HUMAN	Peroxiredoxin 4 OS Homo sapiens GN PRDX4 PE 1 SV 1	Regular	370.16	0.74	30768	10	5	20	23.99	87590	10411.9	24029	2.5835	0.0795	Green	13668
3314	Q8WTT0	CLC4C_HUMAN	C type lectin domain family 4 member C OS Homo sapiens GN CLEC4C PE 2 SV 1	Regular	365.996	0.73	25550.8	6	2	19	3.29	88141	256425	11196	63.6264	1.6257	Green
6494	O95876	FRITZ_HUMAN	WD repeat containing and planar cell polarity effector protein fritz homolog OS Homo sapiens GN WDPC	Regular	365.944	0.73	86224.4	35	13	69	7.91	120985	58465	33187	14.5068	1.2508	Green
16627	P42224	STAT1_HUMAN	Signal transducer and activator of transcription 1 alpha beta OS Homo sapiens GN STAT1 PE 1 SV 2	Regular	362.021	0.73	87905.2	34	13	61	15.07	278840	29637	56810	7.3538	0.6464	Yellow
6516	O95073	FSBP_HUMAN	Fibrinogen silencer binding protein OS Homo sapiens GN FSBP PE 1 SV 1	Regular	355.067	0.72	34881.8	14	5	27	14.38	46011	28313	17963	7.0253	0.2451	Yellow
14433	P15927	RFA2_HUMAN	Replication protein A 32 kDa subunit OS Homo sapiens GN RPA2 PE 1 SV 1	Regular	351.516	0.72	29361	8	5	14	21.48	63020	37181	11211	9.2257	0.2709	Red
7632	P36551	HEM6_HUMAN	Coproporphyrinogen III oxidase mitochondrial OS Homo sapiens GN CPOX PE 1 SV 3	Regular	348.279	0.72	50950.4	20	5	36	14.32	44968	36674	18363	9.0999	0.4636	Yellow
16520	Q07955	SRSF1_HUMAN	Serine arginine rich splicing factor 1 OS Homo sapiens GN SRSF1 PE 1 SV 2	Regular	344.713	0.72	27858.7	16	6	29	19.35	65728	36210	12007	8.9847	0.2503	Yellow
8102	P48735	IDHP_HUMAN	Isocitrate dehydrogenase NADP mitochondrial OS Homo sapiens GN IDH2 PE 1 SV 2	Regular	344.359	0.71	51365.6	27	10	36	13.27	89301	49144	26749	12.194	0.6264	Yellow
16603	P42229	STA5A_HUMAN	Signal transducer and activator of transcription 5A OS Homo sapiens GN STAT5A PE 1 SV 1	Regular	337.001	0.71	91217.4	37	12	57	12.34	156114	55100	27993	13.6719	1.2471	Yellow	16604
3369	Q00610	CLH1_HUMAN	Clathrin heavy chain 1 OS Homo sapiens GN CLTC PE 1 SV 5	Regular	332.337	1.06	193383	75	26	133	16.96	252292	64907	94164	16.1053	3.1145	Green	3370
18308	Q9BSA4	TTYH2_HUMAN	Protein tweety homolog 2 OS Homo sapiens GN TTYH2 PE 1 SV 3	Regular	328.026	1.4	59856	10	2	27	3.18	367687	551530	26248	136.85	8.1913	Green
397	O43707	ACTN4_HUMAN	Alpha actinin 4 OS Homo sapiens GN ACTN4 PE 1 SV 2	Regular	322.002	1.4	105310	45	21	86	13.94	134798	15660	49901	3.8857	0.4092	Yellow	395 394
9462	Q9Y383	LC7L2_HUMAN	Putative RNA binding protein Luc7 like 2 OS Homo sapiens GN LUC7L2 PE 1 SV 2	Regular	320.737	1.39	46970.2	16	6	35	13.27	38025	32957	15335	8.1776	0.3841	Yellow
13170	O00625	PIR_HUMAN	Pirin OS Homo sapiens GN PIR PE 1 SV 1	Regular	310.957	1.73	32227.5	8	4	21	20	20072	16295	14396	4.0433	0.1303	Yellow
8067	P17936	IBP3_HUMAN	Insulin like growth factor binding protein 3 OS Homo sapiens GN IGFBP3 PE 1 SV 2	Regular	308.115	1.72	32700.7	14	6	26	19.93	86754	71077	18421	17.6362	0.5767	Red
14657	P30050	RL12_HUMAN	60S ribosomal protein L12 OS Homo sapiens GN RPL12 PE 1 SV 1	Regular	305.329	2.05	17989.7	12	3	15	11.52	58693	60810	19437	15.0887	0.2714	Red
5310	Q14152	EIF3A_HUMAN	Eukaryotic translation initiation factor 3 subunit A OS Homo sapiens GN EIF3A PE 1 SV 1	Regular	305.153	2.05	166969	39	19	250	6.08	140724	53554	50155	13.2883	2.2187	Green	28927 2766 4503 38376 33460 10929 14158 31433 19578 5669
16843	P54136	SYRC_HUMAN	Arginine tRNA ligase cytoplasmic OS Homo sapiens GN RARS PE 1 SV 2	Regular	302.536	2.04	76177.5	30	12	54	10.15	114637	65180	24931	16.173	1.232	Yellow
15153	Q9Y230	RUVB2_HUMAN	RuvB like 2 OS Homo sapiens GN RUVBL2 PE 1 SV 3	Regular	301.379	2.03	51327.8	25	9	43	11.02	91839	34998	23392	8.684	0.4457	Yellow
18054	Q86XT4	TRI50_HUMAN	E3 ubiquitin protein ligase TRIM50 OS Homo sapiens GN TRIM50 PE 1 SV 1	Regular	294.3	2.03	55857.8	22	9	36	11.5	59289	26344	22175	6.5367	0.3651	Yellow
2112	Q86VP6	CAND1_HUMAN	Cullin associated NEDD8 dissociated protein 1 OS Homo sapiens GN CAND1 PE 1 SV 2	Regular	291.768	2.02	138087	41	13	98	8.7	151116	57967	68122	14.3833	1.9861	Green
6057	Q8IVS2	FABD_HUMAN	Malonyl CoA acyl carrier protein transacylase mitochondrial OS Homo sapiens GN MCAT PE 1 SV 2	Regular	291.261	2.01	43417.8	8	4	31	11.28	33399	22428	13630	5.565	0.2416	Yellow
6394	Q96RU3	FNBP1_HUMAN	Formin binding protein 1 OS Homo sapiens GN FNBP1 PE 1 SV 2	Regular	290.246	2.01	71763.1	26	9	50	12.48	80097	45516	50226	11.2938	0.8105	Red
12079	P10515	ODP2_HUMAN	Dihydrolipoyllysine residue acetyltransferase component of pyruvate dehydrogenase complex mitochond	Regular	284.717	2.33	69510	17	4	44	5.72	64977	44718	19304	11.0958	0.7713	Yellow
394	P12814	ACTN1_HUMAN	Alpha actinin 1 OS Homo sapiens GN ACTN1 PE 1 SV 2	Regular	283.441	2.64	103628	42	15	76	8.74	164204	57143.8	59846	14.179	1.4693	Yellow	397 395
11717	Q9UNZ2	NSF1C_HUMAN	NSFL1 cofactor p47 OS Homo sapiens GN NSFL1C PE 1 SV 2	Regular	282.358	2.63	40572.9	14	4	33	13.24	48396	31810	7652	7.893	0.3202	Yellow
13834	O00232	PSD12_HUMAN	26S proteasome non ATPase regulatory subunit 12 OS Homo sapiens GN PSMD12 PE 1 SV 3	Regular	279.002	2.62	53303.7	24	10	38	6.58	89612	41341	52967	10.2579	0.5468	Red
10273	Q9BTE3	MCMBP_HUMAN	Mini chromosome maintenance complex binding protein OS Homo sapiens GN MCMBP PE 1 SV 2	Regular	278.31	2.61	73835.7	20	8	51	12.15	73251	50353	31547	12.494	0.9225	Yellow	33450
14678	P47914	RL29_HUMAN	60S ribosomal protein L29 OS Homo sapiens GN RPL29 PE 1 SV 2	Regular	277.25	2.92	17809.1	7	2	8	14.47	44321	66481.5	14386	16.496	0.2938	Red
14369	P46063	RECQ1_HUMAN	ATP dependent DNA helicase Q1 OS Homo sapiens GN RECQL PE 1 SV 3	Regular	275.498	2.91	74484	14	5	52	8.94	57384	43704	13709	10.8442	0.8077	Yellow
11049	Q9BXJ9	NAA15_HUMAN	N alpha acetyltransferase 15 NatA auxiliary subunit OS Homo sapiens GN NAA15 PE 1 SV 1	Regular	274.516	3.22	102527	41	16	93	15.7	132741	31784	37358	7.8865	0.8086	Yellow
13819	P55786	PSA_HUMAN	Puromycin sensitive aminopeptidase OS Homo sapiens GN NPEPPS PE 1 SV 2	Regular	270.41	3.21	103961	20	7	68	10.45	62165	48358	22069	11.999	1.2474	Yellow
8512	Q96AZ6	ISG20_HUMAN	Interferon stimulated gene 20 kDa protein OS Homo sapiens GN ISG20 PE 1 SV 2	Regular	270.388	3.19	20534.6	8	3	15	6.08	20055	8808	9551	2.1855	0.0449	Red
16476	Q14247	SRC8_HUMAN	Src substrate cortactin OS Homo sapiens GN CTTN PE 1 SV 2	Regular	266.349	3.18	61757.3	17	9	46	11.64	40432	20620	16428	5.1164	0.316	Yellow
20150	P51504	ZNF80_HUMAN	Zinc finger protein 80 OS Homo sapiens GN ZNF80 PE 2 SV 2	Regular	263.522	3.17	32308	14	6	26	5.86	82442	20386.5	28651	5.0585	0.1634	Red
9647	P43034	LIS1_HUMAN	Platelet activating factor acetylhydrolase IB subunit alpha OS Homo sapiens GN PAFAH1B1 PE 1 SV 2	Regular	252.295	4.38	47208.3	23	7	39	16.59	73167	64414	20557	15.983	0.7545	Yellow
2694	Q00535	CDK5_HUMAN	Cyclin dependent kinase 5 OS Homo sapiens GN CDK5 PE 1 SV 3	Regular	251.153	4.36	33760.7	9	4	27	13.01	24327	11229.2	11298	2.7863	0.0941	Red	2681
13857	Q13200	PSMD2_HUMAN	26S proteasome non ATPase regulatory subunit 2 OS Homo sapiens GN PSMD2 PE 1 SV 3	Regular	243.185	4.94	100941	17	7	85	6.5	122510	36353	22183	9.0202	0.9105	Yellow
14649	Q92963	RIT1_HUMAN	GTP binding protein Rit1 OS Homo sapiens GN RIT1 PE 1 SV 1	Regular	241.051	5.21	25373	8	4	23	17.81	26655	23821	11763	5.9107	0.15	Red
16604	P51692	STA5B_HUMAN	Signal transducer and activator of transcription 5B OS Homo sapiens GN STAT5B PE 1 SV 2	Regular	239.208	5.78	90379.3	28	8	53	7.37	111248	20682.1	24712	5.1318	0.4638	Yellow	16603
2895	Q5TEZ5	CF163_HUMAN	Uncharacterized protein C6orf163 OS Homo sapiens GN C6orf163 PE 1 SV 2	Regular	238.832	5.76	38781.4	15	7	40	6.99	66078	30100.5	46070	7.4688	0.2897	Red
8807	Q674X7	KAZRN_HUMAN	Kazrin OS Homo sapiens GN KAZN PE 1 SV 2	Regular	235.649	6.02	86807.6	19	8	73	10.58	42430	25997	19555	6.4506	0.56	Yellow
10268	P33992	MCM5_HUMAN	DNA replication licensing factor MCM5 OS Homo sapiens GN MCM5 PE 1 SV 5	Regular	231	6.57	83084.1	19	4	57	5.31	75135	67731	24396	16.806	1.3963	Yellow
6141	Q5T0N5	FBP1L_HUMAN	Formin binding protein 1 like OS Homo sapiens GN FNBP1L PE 1 SV 2	Regular	228.043	7.1	70433.8	23	9	52	5.79	57010	16747	42127	4.1554	0.2927	Red
6358	Q13045	FLII_HUMAN	Protein flightless 1 homolog OS Homo sapiens GN FLII PE 1 SV 2	Regular	224.284	7.35	146234	35	14	87	10.32	144333	39020	57727	9.682	1.4158	Yellow
6700	Q14697	GANAB_HUMAN	Neutral alpha glucosidase AB OS Homo sapiens GN GANAB PE 1 SV 3	Regular	223.798	7.33	107330	25	10	69	9.75	75175	42709	25563	10.5973	1.1374	Red
19110	O14980	XPO1_HUMAN	Exportin 1 OS Homo sapiens GN XPO1 PE 1 SV 1	Regular	223.501	7.58	124527	35	12	87	7.94	79316	32629	41541	8.0962	1.0082	Yellow
1135	P61158	ARP3_HUMAN	Actin related protein 3 OS Homo sapiens GN ACTR3 PE 1 SV 3	Regular	222.187	7.56	47827.5	19	7	39	11.96	65339	30841.5	23295	7.6527	0.366	Red	36783
13977	P22102	PUR2_HUMAN	Trifunctional purine biosynthetic protein adenosine 3 OS Homo sapiens GN GART PE 1 SV 1	Regular	222.169	7.54	109022	26	10	77	6.73	73885	52158	31863	12.9419	1.4109	Yellow
10957	Q7Z406	MYH14_HUMAN	Myosin 14 OS Homo sapiens GN MYH14 PE 1 SV 2	Regular	219.368	7.78	228840	61	24	171	7.32	224971	46677.4	83062	11.582	2.6504	Green	10962 10961 10966 10955 10956 10960 10954 10967
17140	Q16650	TBR1_HUMAN	T box brain protein 1 OS Homo sapiens GN TBR1 PE 1 SV 1	Regular	215.275	7.76	74566.6	13	7	44	8.5	31797	12004	13294	2.9785	0.2221	Yellow
2355	Q6ZUS6	CC149_HUMAN	Coiled coil domain containing protein 149 OS Homo sapiens GN CCDC149 PE 2 SV 2	Regular	213.318	7.74	53024.4	15	6	42	7.81	33388	10561	17791	2.6205	0.1389	Red
9051	P33176	KINH_HUMAN	Kinesin 1 heavy chain OS Homo sapiens GN KIF5B PE 1 SV 1	Regular	210.427	7.98	110426	42	14	94	8.83	154083	16215	37867	4.0234	0.4443	Red
14555	P85298	RHG08_HUMAN	Rho GTPase activating protein 8 OS Homo sapiens GN ARHGAP8 PE 1 SV 1	Regular	208.563	8.47	53769	13	3	35	5.17	28760	34698	14617	8.6096	0.4629	Yellow
5124	Q14204	DYHC1_HUMAN	Cytoplasmic dynein 1 heavy chain 1 OS Homo sapiens GN DYNC1H1 PE 1 SV 5	Regular	208.236	8.45	535146	103	43	379	7.99	306516	58489	115719	14.5128	7.7665	Yellow
16687	Q96SI9	STRBP_HUMAN	Spermatid perinuclear RNA binding protein OS Homo sapiens GN STRBP PE 1 SV 1	Regular	207.088	8.43	74337	14	6	71	3.87	48568	7086.51	10079	1.7584	0.1307	Green	8318
7930	Q7Z6Z7	HUWE1_HUMAN	E3 ubiquitin protein ligase HUWE1 OS Homo sapiens GN HUWE1 PE 1 SV 3	Regular	202.341	9.17	485826	52	19	305	4.25	99110	41021	39838	10.1785	4.945	Green
6539	Q92945	FUBP2_HUMAN	Far upstream element binding protein 2 OS Homo sapiens GN KHSRP PE 1 SV 4	Regular	200.832	9.64	73400.6	35	12	48	11.95	124705	54735	39892	13.5813	0.9969	Red
16439	Q01082	SPTB2_HUMAN	Spectrin beta chain non erythrocytic 1 OS Homo sapiens GN SPTBN1 PE 1 SV 2	Regular	199.921	9.62	275408	50	22	240	4.86	159368	29018	78152	7.2002	1.983	Green	16438 16445 6627 16446
11009	P54296	MYOM2_HUMAN	Myomesin 2 OS Homo sapiens GN MYOM2 PE 2 SV 2	Regular	197.129	10.33	166436	65	27	114	6.62	124679	13861	87952	3.4393	0.5724	Red
395	P35609	ACTN2_HUMAN	Alpha actinin 2 OS Homo sapiens GN ACTN2 PE 1 SV 1	Regular	196.737	10.3	104424	50	15	79	6.49	354305	19075.3	69863	4.7331	0.4943	Yellow	397 394
6702	Q9H2C0	GAN_HUMAN	Gigaxonin OS Homo sapiens GN GAN PE 1 SV 1	Regular	195.244	10.51	68722.1	28	9	67	5.86	41398	26649	25373	6.6124	0.4544	Red
8689	Q9P272	K1456_HUMAN	Putative methyltransferase KIAA1456 OS Homo sapiens GN KIAA1456 PE 2 SV 3	Regular	195.158	10.48	52269	6	3	37	7.05	11898	13183.5	8846	3.2712	0.171	Red
181	Q9NRG9	AAAS_HUMAN	Aladin OS Homo sapiens GN AAAS PE 1 SV 1	Regular	195.057	10.46	60429.6	10	5	32	5.31	19066	13469	9701	3.342	0.202	Yellow
5373	Q9HC35	EMAL4_HUMAN	Echinoderm microtubule associated protein like 4 OS Homo sapiens GN EML4 PE 1 SV 3	Regular	192.128	10.43	110000	39	16	76	14.58	151484	58167	74519	14.4329	1.5876	Red
13860	Q16401	PSMD5_HUMAN	26S proteasome non ATPase regulatory subunit 5 OS Homo sapiens GN PSMD5 PE 1 SV 3	Regular	192.066	10.4	56595	11	4	33	7.34	20877	19114	9313	4.7427	0.2684	Red
13990	Q96PZ0	PUS7_HUMAN	Pseudouridylate synthase 7 homolog OS Homo sapiens GN PUS7 PE 1 SV 2	Regular	191.163	10.37	75377.8	10	6	61	8.02	33027	21642	16150	5.37	0.4048	Red
10198	P43243	MATR3_HUMAN	Matrin 3 OS Homo sapiens GN MATR3 PE 1 SV 2	Regular	187.954	11.05	95136.6	16	8	70	6.73	107006	27686	24843	6.8697	0.6536	Yellow
9297	Q9NSB2	KRT84_HUMAN	Keratin type II cuticular Hb4 OS Homo sapiens GN KRT84 PE 1 SV 2	Regular	186.465	11.02	65983	7	4	47	2	99316	218481	12146	54.2114	3.577	Yellow
4423	P98082	DAB2_HUMAN	Disabled homolog 2 OS Homo sapiens GN DAB2 PE 1 SV 3	Regular	186.109	10.99	82562	18	8	57	9.09	22496	10609	18535	2.6324	0.2173	Red
14021	P27708	PYR1_HUMAN	CAD protein OS Homo sapiens GN CAD PE 1 SV 3	Regular	186.042	10.97	245322	43	14	141	5.71	117753	66296	61237	16.4499	4.0355	Yellow
2259	Q5VU57	CBPC6_HUMAN	Cytosolic carboxypeptidase 6 OS Homo sapiens GN AGBL4 PE 2 SV 3	Regular	185.746	11.17	58857.6	27	12	40	14.31	129923	30387	39064	7.5399	0.4438	Yellow
18168	Q96PP4	TSG13_HUMAN	Testis specific gene 13 protein OS Homo sapiens GN TSGA13 PE 1 SV 1	Regular	184.71	11.37	31834.8	12	3	25	11.64	41404	40252.5	13997	9.9878	0.318	Red
17087	Q9NVG8	TBC13_HUMAN	TBC1 domain family member 13 OS Homo sapiens GN TBC1D13 PE 1 SV 3	Regular	182.106	11.34	47180.9	14	5	44	9.5	24652	11197	15363	2.7783	0.1311	Red
19118	O43895	XPP2_HUMAN	Xaa Pro aminopeptidase 2 OS Homo sapiens GN XPNPEP2 PE 1 SV 3	Regular	181.052	11.76	76138.2	20	9	47	8.61	76674	61261	32223	15.2006	1.1573	Red
10152	P27816	MAP4_HUMAN	Microtubule associated protein 4 OS Homo sapiens GN MAP4 PE 1 SV 3	Regular	180.702	11.73	121518	25	13	133	5.38	158410	118866	33669	29.494	3.5841	Yellow
3026	Q13231	CHIT1_HUMAN	Chitotriosidase 1 OS Homo sapiens GN CHIT1 PE 1 SV 1	Regular	180.5	11.7	52251.7	9	5	31	8.15	18177	9522	10320	2.3627	0.1235	Red
19426	Q9C0D4	Z518B_HUMAN	Zinc finger protein 518B OS Homo sapiens GN ZNF518B PE 2 SV 2	Regular	178.924	11.68	121014	26	11	80	5.68	220130	167556	60267	41.5754	5.0312	Yellow
4503	Q66K64	DCA15_HUMAN	DDB1 and CUL4 associated factor 15 OS Homo sapiens GN DCAF15 PE 1 SV 1	Regular	178.889	11.65	67433	15	6	39	10.83	43519	6457.77	29853	1.6024	0.1081	Red	28927 2766 38376 33460 10929 5310 14158 31433 19578 5669
11687	P48552	NRIP1_HUMAN	Nuclear receptor interacting protein 1 OS Homo sapiens GN NRIP1 PE 1 SV 2	Regular	178.715	11.62	127741	28	11	97	7.08	270451	199436	68819	49.4858	6.3213	Yellow
15368	Q8TF17	S3TC2_HUMAN	SH3 domain and tetratricopeptide repeat containing protein 2 OS Homo sapiens GN SH3TC2 PE 1 SV 2	Regular	178.471	11.59	146773	25	10	104	4.11	68345	35467	33111	8.8004	1.2917	Yellow
11555	O00567	NOP56_HUMAN	Nucleolar protein 56 OS Homo sapiens GN NOP56 PE 1 SV 4	Regular	178.176	11.56	66449.2	13	6	48	8.25	38369	14505	13107	3.5991	0.2392	Red
16512	A6NNA2	SRRM3_HUMAN	Serine arginine repetitive matrix protein 3 OS Homo sapiens GN SRRM3 PE 2 SV 4	Regular	176.369	11.97	65648.6	8	3	54	5.53	34479	25494	10676	6.3258	0.4153	Red
15858	Q15465	SHH_HUMAN	Sonic hedgehog protein OS Homo sapiens GN SHH PE 1 SV 1	Regular	175.138	11.94	50006.5	9	5	33	6.06	18781	14304	6009	3.5492	0.1775	Yellow	30791
16063	O60264	SMCA5_HUMAN	SWI SNF related matrix associated actin dependent regulator of chromatin subfamily A member 5 OS Hom	Regular	175.124	11.91	122590	29	13	94	6.18	104508	53907	77418	13.3759	1.6397	Yellow
6360	P21333	FLNA_HUMAN	Filamin A OS Homo sapiens GN FLNA PE 1 SV 4	Regular	174.824	12.1	283477	39	16	176	6.35	151134	57706.8	48522	14.3187	4.059	Yellow	6361
15750	Q15393	SF3B3_HUMAN	Splicing factor 3B subunit 3 OS Homo sapiens GN SF3B3 PE 1 SV 4	Regular	173.245	12.5	136661	24	8	72	3.78	85264	43453	45996	10.7819	1.4735	Yellow
6612	Q13283	G3BP1_HUMAN	Ras GTPase activating protein binding protein 1 OS Homo sapiens GN G3BP1 PE 1 SV 1	Regular	172.998	12.47	52221.4	9	3	30	5.15	24337	28635	15265	7.1052	0.371	Red
16218	Q9Y4B5	SOGA2_HUMAN	Protein SOGA2 OS Homo sapiens GN SOGA2 PE 1 SV 5	Regular	172.701	12.65	210781	52	22	170	5.51	126193	53158	49040	13.19	2.7802	Yellow	16217
12514	Q96A73	P33MX_HUMAN	Putative monooxygenase p33MONOX OS Homo sapiens GN KIAA1191 PE 1 SV 1	Regular	171.819	12.83	33246.8	10	4	26	13.11	48838	15033	15058	3.7301	0.124	Red
10745	Q6IN84	MRM1_HUMAN	rRNA methyltransferase 1 mitochondrial OS Homo sapiens GN MRM1 PE 1 SV 1	Regular	166.682	13.64	39094.6	7	3	26	11.33	9060	9060	8391	2.248	0.0879	Red
10964	A7E2Y1	MYH7B_HUMAN	Myosin 7B OS Homo sapiens GN MYH7B PE 2 SV 3	Regular	165.268	14.22	222529	48	25	162	6.85	116250	30870	68538	7.6597	1.7045	Red	15172 15171 37255
7799	P07910	HNRPC_HUMAN	Heterogeneous nuclear ribonucleoproteins C1 C2 OS Homo sapiens GN HNRNPC PE 1 SV 4	Regular	162.381	15.38	33727.1	10	4	34	3.92	55361	50628	11707	12.5623	0.4237	Red
517	P55197	AF10_HUMAN	Protein AF 10 OS Homo sapiens GN MLLT10 PE 1 SV 1	Regular	161.333	15.74	110223	18	6	46	4.97	55854	69999	19982	17.3688	1.9144	Red
17063	Q9C0C2	TB182_HUMAN	182 kDa tankyrase 1 binding protein OS Homo sapiens GN TNKS1BP1 PE 1 SV 4	Regular	160.497	16.28	182822	42	16	149	10.93	102215	34336	62096	8.5197	1.5576	Red
9734	P42704	LPPRC_HUMAN	Leucine rich PPR motif containing protein mitochondrial OS Homo sapiens GN LRPPRC PE 1 SV 3	Regular	160.211	16.44	159103	43	18	130	8.03	89894	31622	49886	7.8463	1.2484	Yellow
10266	P25205	MCM3_HUMAN	DNA replication licensing factor MCM3 OS Homo sapiens GN MCM3 PE 1 SV 3	Regular	159.581	16.4	91608.3	26	12	78	11.14	150588	46469	26707	11.5303	1.0563	Red
9618	Q8ND30	LIPB2_HUMAN	Liprin beta 2 OS Homo sapiens GN PPFIBP2 PE 1 SV 3	Regular	158.785	16.55	99114.1	10	5	70	3.08	27694	25338	14035	6.2871	0.6231	Yellow
10055	Q9NTJ4	MA2C1_HUMAN	Alpha mannosidase 2C1 OS Homo sapiens GN MAN2C1 PE 1 SV 1	Regular	158.356	16.52	117033	17	4	65	2.21	215655	306849	53508	76.138	8.9107	Yellow
16434	O00267	SPT5H_HUMAN	Transcription elongation factor SPT5 OS Homo sapiens GN SUPT5H PE 1 SV 1	Regular	158.062	16.48	121399	30	13	87	7.45	96238	12180	47842	3.0222	0.3669	Red
19116	O43592	XPOT_HUMAN	Exportin T OS Homo sapiens GN XPOT PE 1 SV 2	Regular	157.999	16.44	111219	22	6	65	4.26	31834	12236	28034	3.0361	0.3377	Red
8459	P46940	IQGA1_HUMAN	Ras GTPase activating like protein IQGAP1 OS Homo sapiens GN IQGAP1 PE 1 SV 1	Regular	157.888	16.4	189880	44	20	116	5.55	153928	39122	60661	9.7073	1.8432	Red	8460
11839	Q9GZY0	NXF2_HUMAN	Nuclear RNA export factor 2 OS Homo sapiens GN NXF2 PE 1 SV 1	Regular	157.552	16.37	72767.8	17	6	52	7.83	24672	12270	21201	3.0445	0.2215	Red
6577	Q96ME1	FXL18_HUMAN	F box LRR repeat protein 18 OS Homo sapiens GN FBXL18 PE 2 SV 2	Regular	157.418	16.33	90166.4	9	4	53	6.21	14914	5367	8514	1.3317	0.1201	Red
2326	Q8TBZ0	CC110_HUMAN	Coiled coil domain containing protein 110 OS Homo sapiens GN CCDC110 PE 2 SV 1	Regular	156.32	16.48	97296	31	12	80	3.96	72119	16786	57215	4.1651	0.4052	Red
11479	Q9NVX2	NLE1_HUMAN	Notchless protein homolog 1 OS Homo sapiens GN NLE1 PE 1 SV 4	Regular	156.272	16.44	53833.6	4	3	32	5.77	5318	6370.5	4814	1.5807	0.0851	Red
243	Q9UG63	ABCF2_HUMAN	ATP binding cassette sub family F member 2 OS Homo sapiens GN ABCF2 PE 1 SV 2	Regular	155.553	16.41	71860.7	16	10	57	16.85	65797	21615	14434	5.3633	0.3854	Red
5598	Q9NY74	ETAA1_HUMAN	Ewing s tumor associated antigen 1 OS Homo sapiens GN ETAA1 PE 1 SV 2	Regular	154.918	16.37	104524	17	9	71	4.75	102052	51567	23864	12.7952	1.3374	Red
6593	Q9BQS8	FYCO1_HUMAN	FYVE and coiled coil domain containing protein 1 OS Homo sapiens GN FYCO1 PE 1 SV 3	Regular	153.009	17.07	168694	40	19	150	5.21	83092	13690	42777	3.3969	0.573	Red
17305	Q00403	TF2B_HUMAN	Transcription initiation factor IIB OS Homo sapiens GN GTF2B PE 1 SV 1	Regular	150.791	18.1	35346.2	8	5	24	9.49	54162	21936	12557	5.4429	0.1924	Red
16510	Q8IYB3	SRRM1_HUMAN	Serine arginine repetitive matrix protein 1 OS Homo sapiens GN SRRM1 PE 1 SV 2	Regular	150.434	18.06	102392	11	2	89	3.76	15897	26712	10550	6.628	0.6787	Red
7712	O75146	HIP1R_HUMAN	Huntingtin interacting protein 1 related protein OS Homo sapiens GN HIP1R PE 1 SV 2	Regular	149.158	18.03	120073	43	19	96	7.77	129155	55172	52965	13.6897	1.6438	Red
13856	Q99460	PSMD1_HUMAN	26S proteasome non ATPase regulatory subunit 1 OS Homo sapiens GN PSMD1 PE 1 SV 2	Regular	149.154	17.99	106863	25	12	75	10.81	63303	26777	26729	6.6441	0.71	Red
11311	Q6P3R8	NEK5_HUMAN	Serine threonine protein kinase Nek5 OS Homo sapiens GN NEK5 PE 1 SV 1	Regular	148.756	18.3	82415.1	13	9	59	5.93	52136	10198	17614	2.5304	0.2085	Red
19117	Q9NQW7	XPP1_HUMAN	Xaa Pro aminopeptidase 1 OS Homo sapiens GN XPNPEP1 PE 1 SV 3	Regular	147.975	18.6	70602.3	17	6	57	8.19	58203	2955	26312	0.7332	0.0518	Red
3784	P33261	CP2CJ_HUMAN	Cytochrome P450 2C19 OS Homo sapiens GN CYP2C19 PE 1 SV 3	Regular	147.697	18.57	56672.5	8	3	45	7.55	11943	6075.32	4818	1.5075	0.0854	Red	3781
3762	Q66GS9	CP135_HUMAN	Centrosomal protein of 135 kDa OS Homo sapiens GN CEP135 PE 1 SV 2	Regular	146.485	19.21	133947	36	16	150	7.89	296992	226543	52570	56.2118	7.5294	Red
13399	Q8TCS8	PNPT1_HUMAN	Polyribonucleotide nucleotidyltransferase 1 mitochondrial OS Homo sapiens GN PNPT1 PE 1 SV 2	Regular	145.484	19.5	86578.1	22	8	76	6.26	137051	22531	44221	5.5906	0.484	Red
18473	Q14139	UBE4A_HUMAN	Ubiquitin conjugation factor E4 A OS Homo sapiens GN UBE4A PE 1 SV 2	Regular	144.172	19.79	123644	12	10	78	2.25	66273	4590	15940	1.1389	0.1408	Yellow
8677	Q8WUJ3	K1199_HUMAN	Protein KIAA1199 OS Homo sapiens GN KIAA1199 PE 1 SV 2	Regular	143.772	20.08	154538	33	14	90	6.98	116082	13928	38927	3.4559	0.5341	Red
14722	Q7Z7H8	RM10_HUMAN	39S ribosomal protein L10 mitochondrial OS Homo sapiens GN MRPL10 PE 1 SV 3	Regular	142.948	20.2	29510.7	10	4	18	6.9	95542	108069	11557	26.815	0.7913	Red
7814	Q9UJC3	HOOK1_HUMAN	Protein Hook homolog 1 OS Homo sapiens GN HOOK1 PE 1 SV 2	Regular	141.948	20.33	85275.3	25	9	69	5.77	71899	18131	60782	4.4988	0.3836	Red
17056	Q86VP1	TAXB1_HUMAN	Tax1 binding protein 1 OS Homo sapiens GN TAX1BP1 PE 1 SV 2	Regular	141.917	20.28	91960.7	20	11	85	5.2	87887	25805	35106	6.403	0.5888	Red
8082	Q9UMF0	ICAM5_HUMAN	Intercellular adhesion molecule 5 OS Homo sapiens GN ICAM5 PE 1 SV 3	Regular	141.43	20.4	98827.2	10	4	58	2.49	28146	3834	34956	0.9513	0.094	Red
2092	Q5T5Y3	CAMP1_HUMAN	Calmodulin regulated spectrin associated protein 1 OS Homo sapiens GN CAMSAP1 PE 1 SV 2	Regular	141.139	20.36	179341	35	17	154	6.55	141740	53810	58515	13.3518	2.3945	Red	2094
17276	P54274	TERF1_HUMAN	Telomeric repeat binding factor 1 OS Homo sapiens GN TERF1 PE 1 SV 3	Regular	140.8	20.48	50701.9	13	7	32	11.62	82276	21228	21711	5.2673	0.2671	Red
10518	P27361	MK03_HUMAN	Mitogen activated protein kinase 3 OS Homo sapiens GN MAPK3 PE 1 SV 4	Regular	140.655	20.44	43477.8	8	5	33	9.23	10586	2179.07	6876	0.5407	0.0235	Red	10517
18978	B1ANS9	WDR64_HUMAN	WD repeat containing protein 64 OS Homo sapiens GN WDR64 PE 2 SV 1	Regular	140.479	20.4	124886	24	11	90	3.79	53325	29404	28830	7.296	0.9112	Red
399	Q8TDG2	ACTT1_HUMAN	Actin related protein T1 OS Homo sapiens GN ACTRT1 PE 2 SV 2	Regular	139.958	20.36	42266.6	12	5	35	11.7	77963	67408	7362	16.7259	0.7069	Red
842	Q8N6D5	ANR29_HUMAN	Ankyrin repeat domain containing protein 29 OS Homo sapiens GN ANKRD29 PE 2 SV 2	Regular	139.648	20.48	32613.4	5	2	28	6.98	21163	9915	6989	2.4602	0.0802	Red
13471	B7ZBB8	PP13G_HUMAN	Putative protein phosphatase 1 regulatory inhibitor subunit 3G OS Homo sapiens GN PPP1R3G PE 4 SV 1	Regular	139.615	20.44	38760.1	8	2	23	6.15	27646	26916	16407	6.6786	0.2589	Red
16515	Q9BXP5	SRRT_HUMAN	Serrate RNA effector molecule homolog OS Homo sapiens GN SRRT PE 1 SV 1	Regular	139.349	20.4	101123	20	10	90	7.31	42790	17461	19355	4.3326	0.4381	Red
11047	P41227	NAA10_HUMAN	N alpha acetyltransferase 10 OS Homo sapiens GN NAA10 PE 1 SV 1	Regular	138.835	20.83	26629.6	11	4	25	13.62	29434	19548	5388	4.8504	0.1292	Red
14075	Q09MP3	R51A2_HUMAN	RAD51 associated protein 2 OS Homo sapiens GN RAD51AP2 PE 1 SV 1	Regular	138.694	20.78	135846	27	12	112	3.62	54040	12968	27907	3.2177	0.4371	Red
1047	A1IGU5	ARH37_HUMAN	Rho guanine nucleotide exchange factor 37 OS Homo sapiens GN ARHGEF37 PE 2 SV 2	Regular	138.474	20.74	76677.4	21	7	52	6.52	95733	58298	26781	14.4654	1.1092	Red
1762	Q6RI45	BRWD3_HUMAN	Bromodomain and WD repeat containing protein 3 OS Homo sapiens GN BRWD3 PE 1 SV 2	Regular	138.459	20.86	205366	27	12	129	1.83	64070	23212	27777	5.7596	1.1828	Red	13073
18612	Q9NYU2	UGGG1_HUMAN	UDP glucose glycoprotein glucosyltransferase 1 OS Homo sapiens GN UGGT1 PE 1 SV 3	Regular	137.737	20.82	177931	45	16	116	5.02	78372	21628	72420	5.3665	0.9549	Yellow	18613
8783	Q6NY19	KANK3_HUMAN	KN motif and ankyrin repeat domain containing protein 3 OS Homo sapiens GN KANK3 PE 2 SV 1	Regular	137.663	20.93	89052.8	19	6	60	5.24	52039	27045	31300	6.7106	0.5976	Red
16018	Q9H2G2	SLK_HUMAN	STE20 like serine threonine protein kinase OS Homo sapiens GN SLK PE 1 SV 1	Regular	137.645	21.04	143322	28	18	123	10.61	114067	21209	39737	5.2626	0.7542	Red
1556	O75363	BCAS1_HUMAN	Breast carcinoma amplified sequence 1 OS Homo sapiens GN BCAS1 PE 1 SV 2	Regular	137.58	21	61994.1	9	5	59	12.16	25626	19826	6044	4.9194	0.305	Red
5822	Q9C0I3	F190A_HUMAN	Protein FAM190A OS Homo sapiens GN FAM190A PE 2 SV 2	Regular	137.234	21.26	100309	25	10	80	6.67	170482	46824	36292	11.6184	1.1654	Red
17065	Q9NU19	TB22B_HUMAN	TBC1 domain family member 22B OS Homo sapiens GN TBC1D22B PE 1 SV 3	Regular	137.099	21.22	59366.3	14	6	40	11.68	53428	10410	53963	2.583	0.1533	Red	17200
14271	P49756	RBM25_HUMAN	RNA binding protein 25 OS Homo sapiens GN RBM25 PE 1 SV 3	Regular	137.027	21.33	100528	20	11	377	3.8	93743	30805	38602	7.6436	0.7684	Red
16726	Q9UMX1	SUFU_HUMAN	Suppressor of fused homolog OS Homo sapiens GN SUFU PE 1 SV 2	Regular	136.239	21.29	54289	7	4	33	8.06	24777	16998	11768	4.2177	0.229	Red
12632	Q4VXU2	PAP1L_HUMAN	Polyadenylate binding protein 1 like OS Homo sapiens GN PABPC1L PE 2 SV 1	Regular	135.939	21.25	69019.7	15	6	46	5.7	85051	54473	21468	13.5163	0.9329	Red
18732	P15313	VATB1_HUMAN	V type proton ATPase subunit B kidney isoform OS Homo sapiens GN ATP6V1B1 PE 1 SV 3	Regular	135.777	21.21	57232.4	12	4	41	7.21	10171	2956.5	11121	0.7336	0.042	Red	12673
13470	Q9BZL4	PP12C_HUMAN	Protein phosphatase 1 regulatory subunit 12C OS Homo sapiens GN PPP1R12C PE 1 SV 1	Regular	134.562	21.62	85337.5	15	7	63	4.35	85133	15400.5	20542	3.8213	0.3261	Red
1632	Q8TD16	BICD2_HUMAN	Protein bicaudal D homolog 2 OS Homo sapiens GN BICD2 PE 1 SV 1	Regular	134.252	21.58	93761.4	30	10	84	7.65	100401	47677	57746	11.83	1.1092	Red	1631
18688	Q5T230	UTF1_HUMAN	Undifferentiated embryonic cell transcription factor 1 OS Homo sapiens GN UTF1 PE 1 SV 1	Regular	134.117	21.54	36666.6	4	2	34	4.99	8670	22983	8618	5.7027	0.2091	Red
2289	Q6NW34	CC017_HUMAN	Uncharacterized protein C3orf17 OS Homo sapiens GN C3orf17 PE 1 SV 3	Regular	133.642	21.79	65407.2	10	6	49	5.64	52543	19371	12827	4.8065	0.3144	Red
13684	Q86YN6	PRGC2_HUMAN	Peroxisome proliferator activated receptor gamma coactivator 1 beta OS Homo sapiens GN PPARGC1B PE 1	Regular	133.003	22.18	115104	26	7	74	3.52	129709	109719	27305	27.2244	3.1337	Red
10153	Q96JE9	MAP6_HUMAN	Microtubule associated protein 6 OS Homo sapiens GN MAP6 PE 1 SV 2	Regular	132.987	22.28	86733.5	19	10	107	11.32	91446	61688	45061	15.3066	1.3276	Red
8664	Q8IV33	K0825_HUMAN	Uncharacterized protein KIAA0825 OS Homo sapiens GN KIAA0825 PE 2 SV 2	Regular	132.211	22.81	149873	17	8	101	4.55	83669	29805	36265	7.3955	1.1084	Red
17121	Q5QJ74	TBCEL_HUMAN	Tubulin specific chaperone cofactor E like protein OS Homo sapiens GN TBCEL PE 2 SV 2	Regular	131.168	23.19	48708.3	14	5	32	15.33	27912	11956	16502	2.9666	0.1445	Red
2399	Q49A88	CCD14_HUMAN	Coiled coil domain containing protein 14 OS Homo sapiens GN CCDC14 PE 2 SV 3	Regular	130.582	23.29	107271	20	9	83	5.04	200755	174657	56123	43.3374	4.6489	Red	3645
18405	O75643	U520_HUMAN	U5 small nuclear ribonucleoprotein 200 kDa helicase OS Homo sapiens GN SNRNP200 PE 1 SV 2	Regular	129.929	23.52	246162	52	17	177	6.13	168171	89285	61127	22.1542	5.4535	Red
4610	P17844	DDX5_HUMAN	Probable ATP dependent RNA helicase DDX5 OS Homo sapiens GN DDX5 PE 1 SV 1	Regular	129.754	23.61	69661.4	14	8	59	7	48573	19080	15361	4.7343	0.3298	Red	4581
12515	O00443	P3C2A_HUMAN	Phosphatidylinositol 4 phosphate 3 kinase C2 domain containing subunit alpha OS Homo sapiens GN PIK3	Regular	129.725	23.71	192277	38	19	150	5.99	132463	50030	51182	12.4139	2.3869	Red
20082	Q17R98	ZN827_HUMAN	Zinc finger protein 827 OS Homo sapiens GN ZNF827 PE 2 SV 1	Regular	128.655	23.94	120762	25	11	87	8.33	71591	38259	117210	9.4931	1.1464	Red
246	Q9UNQ0	ABCG2_HUMAN	ATP binding cassette sub family G member 2 OS Homo sapiens GN ABCG2 PE 1 SV 3	Regular	128.329	24.03	72998.7	18	7	44	5.65	114739	24122	39561	5.9854	0.4369	Red
1384	Q8TE56	ATS17_HUMAN	A disintegrin and metalloproteinase with thrombospondin motifs 17 OS Homo sapiens GN ADAMTS17 PE 2 S	Regular	128.318	23.99	124891	16	7	80	2.19	181175	69595	28938	17.2685	2.1567	Yellow	32008 15860
14969	Q9Y6S9	RPKL1_HUMAN	Ribosomal protein S6 kinase like 1 OS Homo sapiens GN RPS6KL1 PE 2 SV 1	Regular	127.536	24.08	60777.7	18	9	37	8.38	51776	29094	20964	7.2191	0.4388	Red
16785	P49589	SYCC_HUMAN	Cysteine tRNA ligase cytoplasmic OS Homo sapiens GN CARS PE 1 SV 3	Regular	125.882	24.7	86157.8	25	13	63	13.64	157801	39582	24823	9.8214	0.8462	Red
2296	Q6NXP0	CC025_HUMAN	EF hand domain containing protein C3orf25 OS Homo sapiens GN C3orf25 PE 2 SV 1	Regular	125.834	24.78	67064.1	11	4	48	4.2	19314	28035	16591	6.9563	0.4665	Red
1224	Q9NWL6	ASND1_HUMAN	Asparagine synthetase domain containing protein 1 OS Homo sapiens GN ASNSD1 PE 2 SV 2	Regular	125.766	24.74	72878.3	15	6	51	4.04	114030	61084.5	27375	15.1568	1.1046	Red	38490 2113 30066 34809 34165 23771
10647	Q8TE76	MORC4_HUMAN	MORC family CW type zinc finger protein 4 OS Homo sapiens GN MORC4 PE 1 SV 2	Regular	125.76	24.7	107147	27	13	77	4.16	70668	16666	27105	4.1353	0.4431	Red
11496	Q12879	NMDE1_HUMAN	Glutamate NMDA receptor subunit epsilon 1 OS Homo sapiens GN GRIN2A PE 1 SV 1	Regular	124.917	25.3	166594	31	14	103	5.46	93678	59131	58150	14.6721	2.4443	Red
18540	P40818	UBP8_HUMAN	Ubiquitin carboxyl terminal hydrolase 8 OS Homo sapiens GN USP8 PE 1 SV 1	Regular	124.859	25.38	128493	34	14	98	3.67	62992	15850	35992	3.9328	0.5053	Red	6797
15912	Q96JF0	SIAT2_HUMAN	Beta galactoside alpha 2 6 sialyltransferase 2 OS Homo sapiens GN ST6GAL2 PE 1 SV 2	Regular	124.828	25.34	60500.1	11	4	40	4.35	21580	27126	8103	6.7307	0.4072	Red
6380	Q96PY5	FMNL2_HUMAN	Formin like protein 2 OS Homo sapiens GN FMNL2 PE 1 SV 3	Regular	124.775	25.3	123777	33	12	86	4.79	175880	55947	58738	13.882	1.7183	Red
18563	O94888	UBXN7_HUMAN	UBX domain containing protein 7 OS Homo sapiens GN UBXN7 PE 1 SV 2	Regular	124.5	25.38	55261.6	21	9	36	15.34	130005	24291	75325	6.0273	0.3331	Red
18807	Q2NL98	VMAC_HUMAN	Vimentin type intermediate filament associated coiled coil protein OS Homo sapiens GN VMAC PE 2 SV 1	Regular	124.231	25.46	18404.7	5	1	22	7.1	7901	9831	10492	2.4394	0.0449	Red
2924	Q9BPX7	CG025_HUMAN	UPF0415 protein C7orf25 OS Homo sapiens GN C7orf25 PE 1 SV 1	Regular	124.204	25.42	46736.2	13	3	48	3.56	24385	11160	22813	2.7691	0.1294	Red
5375	Q6ZMW3	EMAL6_HUMAN	Echinoderm microtubule associated protein like 6 OS Homo sapiens GN EML6 PE 2 SV 2	Regular	124.097	25.38	220409	61	25	169	6.59	255702	96041	78660	23.8305	5.2525	Yellow
8189	Q8WYA0	IFT81_HUMAN	Intraflagellar transport protein 81 homolog OS Homo sapiens GN IFT81 PE 1 SV 1	Regular	123.848	25.46	80088	17	7	72	6.95	57826	48963	28323	12.1491	0.973	Red
5796	Q6ZUX3	F179A_HUMAN	Protein FAM179A OS Homo sapiens GN FAM179A PE 2 SV 2	Regular	123.62	25.42	112066	20	10	92	6.38	29396	9000	16715	2.2332	0.2503	Red
14151	Q92878	RAD50_HUMAN	DNA repair protein RAD50 OS Homo sapiens GN RAD50 PE 1 SV 1	Regular	123.509	25.5	154919	49	17	138	5.72	318340	237573	110516	58.9486	9.1323	Red
8716	P02533	K1C14_HUMAN	Keratin type I cytoskeletal 14 OS Homo sapiens GN KRT14 PE 1 SV 4	Regular	123.509	25.46	51903.7	12	6	42	4.66	84474	43607.1	7443	10.8202	0.5616	Red	8721
15543	Q6ZMJ2	SCAR5_HUMAN	Scavenger receptor class A member 5 OS Homo sapiens GN SCARA5 PE 2 SV 1	Regular	123.282	25.42	54678.7	8	4	41	5.45	21046	15463.5	10322	3.8369	0.2098	Red
1561	Q9P287	BCCIP_HUMAN	BRCA2 and CDKN1A interacting protein OS Homo sapiens GN BCCIP PE 1 SV 1	Regular	123.149	25.5	36321.7	8	5	32	15.29	18406	10891.5	7635	2.7025	0.0982	Red
18539	Q93009	UBP7_HUMAN	Ubiquitin carboxyl terminal hydrolase 7 OS Homo sapiens GN USP7 PE 1 SV 2	Regular	122.875	25.45	129386	27	14	98	8.8	103054	30171	26977	7.4863	0.9686	Red
9122	Q2WGJ6	KLH38_HUMAN	Kelch like protein 38 OS Homo sapiens GN KLHL38 PE 2 SV 3	Regular	122.643	25.41	66567.3	25	10	56	4.48	35008	12112.5	27551	3.0055	0.2001	Red
8662	Q2KHM9	K0753_HUMAN	Uncharacterized protein KIAA0753 OS Homo sapiens GN KIAA0753 PE 2 SV 3	Regular	122.566	25.49	110319	27	10	84	4.96	50449	18837	33823	4.674	0.5156	Red
12727	Q96QU1	PCD15_HUMAN	Protocadherin 15 OS Homo sapiens GN PCDH15 PE 1 SV 2	Regular	122.471	25.45	217438	42	17	121	5.32	96807	23844	66429	5.9164	1.2864	Red
18642	Q6UXZ4	UNC5D_HUMAN	Netrin receptor UNC5D OS Homo sapiens GN UNC5D PE 1 SV 1	Regular	121.826	25.9	107990	15	4	51	2.1	50431	22242	43906	5.5189	0.596	Red
20098	Q6ZMS4	ZN852_HUMAN	Putative zinc finger protein 852 OS Homo sapiens GN ZNF852 PE 5 SV 3	Regular	121.659	25.85	59591.2	15	4	38	4.52	54940	32338.5	17032	8.0241	0.4782	Red
5223	Q15075	EEA1_HUMAN	Early endosome antigen 1 OS Homo sapiens GN EEA1 PE 1 SV 2	Regular	121.33	25.93	163435	40	20	158	8.01	105678	27519	73105	6.8282	1.116	Red
2402	Q5T9S5	CCD18_HUMAN	Coiled coil domain containing protein 18 OS Homo sapiens GN CCDC18 PE 1 SV 1	Regular	121.1	25.89	170103	36	15	152	9.01	51581	22958	33392	5.6965	0.969	Red
12621	Q504Q3	PAN2_HUMAN	PAB dependent poly A specific ribonuclease subunit 2 OS Homo sapiens GN PAN2 PE 1 SV 3	Regular	121.006	25.85	136851	20	8	76	3.99	55088	19853	25489	4.9261	0.6741	Red	33474
6037	Q6ZRV2	FA83H_HUMAN	Protein FAM83H OS Homo sapiens GN FAM83H PE 1 SV 3	Regular	120.853	25.81	127636	31	12	90	5.77	227645	36338	47431	9.0165	1.1508	Red
20138	Q68EA5	ZNF57_HUMAN	Zinc finger protein 57 OS Homo sapiens GN ZNF57 PE 2 SV 3	Regular	120.223	26.12	66423.6	22	11	44	7.03	65450	10730	16976	2.6624	0.1768	Red
3377	P30622	CLIP1_HUMAN	CAP Gly domain containing linker protein 1 OS Homo sapiens GN CLIP1 PE 1 SV 2	Regular	120.169	26.08	162988	48	19	142	6.26	142243	26994	58396	6.698	1.0917	Yellow	21307
12096	O15294	OGT1_HUMAN	UDP N acetylglucosamine peptide N acetylglucosaminyltransferase 110 kDa subunit OS Homo sapiens GN	Regular	120.124	26.04	118179	21	7	73	8.41	15143	6621	14972	1.6429	0.1942	Red
7920	O43719	HTSF1_HUMAN	HIV Tat specific factor 1 OS Homo sapiens GN HTATSF1 PE 1 SV 1	Regular	119.225	26.7	86423.2	14	5	106	2.38	21234	21084	12834	5.2315	0.4521	Red
19687	O75820	ZN189_HUMAN	Zinc finger protein 189 OS Homo sapiens GN ZNF189 PE 2 SV 2	Regular	118.621	26.77	75085.7	12	7	60	11.98	27472	19773	13420	4.9062	0.3684	Red
5834	Q6UWH4	F198B_HUMAN	Protein FAM198B OS Homo sapiens GN FAM198B PE 2 SV 1	Regular	118.598	26.84	58293.6	8	5	41	7.51	36609	33682	12412	8.3575	0.4872	Red
4564	Q16531	DDB1_HUMAN	DNA damage binding protein 1 OS Homo sapiens GN DDB1 PE 1 SV 1	Regular	118.199	27.15	128223	25	11	84	7.63	92031	61990	41943	15.3815	1.9723	Red
10210	Q9BQG0	MBB1A_HUMAN	Myb binding protein 1A OS Homo sapiens GN MYBBP1A PE 1 SV 2	Regular	117.98	27.22	149824	20	10	103	4.67	70646	36393	31056	9.0301	1.3529	Red
1060	O15085	ARHGB_HUMAN	Rho guanine nucleotide exchange factor 11 OS Homo sapiens GN ARHGEF11 PE 1 SV 1	Regular	117.272	27.51	168560	16	9	112	4.34	58780	4745	18932	1.1774	0.1985	Red
8721	P08727	K1C19_HUMAN	Keratin type I cytoskeletal 19 OS Homo sapiens GN KRT19 PE 1 SV 4	Regular	116.612	27.58	44106.1	20	9	42	11	56238	14460.6	16289	3.5881	0.1583	Red	8716
4585	Q9NR30	DDX21_HUMAN	Nucleolar RNA helicase 2 OS Homo sapiens GN DDX21 PE 1 SV 5	Regular	116.527	27.54	87857.8	15	9	75	8.94	51284	20024	30708	4.9685	0.4365	Red
12812	O95613	PCNT_HUMAN	Pericentrin OS Homo sapiens GN PCNT PE 1 SV 4	Regular	116.475	27.5	380832	70	41	342	6.71	514747	207678	90189	51.5308	19.6246	Red	618
15453	Q8TEE9	SAP25_HUMAN	Histone deacetylase complex subunit SAP25 OS Homo sapiens GN SAP25 PE 1 SV 2	Regular	116.155	27.79	21215	5	3	9	9.55	11021	14239.5	3401	3.5332	0.075	Red
9301	Q15349	KS6A2_HUMAN	Ribosomal protein S6 kinase alpha 2 OS Homo sapiens GN RPS6KA2 PE 1 SV 2	Regular	115.936	27.74	83695.1	30	14	75	6.14	194097	117105	69140	29.0571	2.4319	Red	2991 9300
1297	Q96QE3	ATAD5_HUMAN	ATPase family AAA domain containing protein 5 OS Homo sapiens GN ATAD5 PE 1 SV 4	Regular	115.074	27.7	209623	47	17	162	6.72	144753	54955	57404	13.6359	2.8584	Red
14018	P11217	PYGM_HUMAN	Glycogen phosphorylase muscle form OS Homo sapiens GN PYGM PE 1 SV 6	Regular	115.061	27.66	97548.5	19	10	75	7.24	103565	61922.4	33765	15.3647	1.4988	Red	14017
10775	O43196	MSH5_HUMAN	MutS protein homolog 5 OS Homo sapiens GN MSH5 PE 1 SV 1	Regular	114.96	27.62	93731	12	4	64	5.16	34085	27325	20126	6.7801	0.6355	Red
6797	Q92616	GCN1L_HUMAN	Translational activator GCN1 OS Homo sapiens GN GCN1L1 PE 1 SV 6	Regular	114.811	27.69	295154	47	24	225	5.54	97770	20745	46916	5.1474	1.5193	Red	18540
19077	Q9ULE0	WWC3_HUMAN	Protein WWC3 OS Homo sapiens GN WWC3 PE 2 SV 3	Regular	114.412	27.75	123817	22	12	102	2.66	104182	37182.2	22180	9.226	1.1423	Green	7
14666	O76021	RL1D1_HUMAN	Ribosomal L1 domain containing protein 1 OS Homo sapiens GN RSL1D1 PE 1 SV 3	Regular	114.062	27.82	55200.7	12	4	43	6.53	43859	6622.5	5861	1.6432	0.0907	Red
18786	Q00341	VIGLN_HUMAN	Vigilin OS Homo sapiens GN HDLBP PE 1 SV 2	Regular	113.261	28.1	142083	31	12	116	3.39	190950	76405	44379	18.9583	2.6936	Red
19352	A8MPV3	YR010_HUMAN	Putative uncharacterized protein ENSP00000344348 OS Homo sapiens PE 2 SV 2	Regular	113.241	28.06	46775.5	8	7	49	14.18	42520	11164	10725	2.7701	0.1296	Red
13565	Q6ZMI0	PPR21_HUMAN	Protein phosphatase 1 regulatory subunit 21 OS Homo sapiens GN PPP1R21 PE 1 SV 1	Regular	113.068	28.02	88827.9	18	7	69	10.64	94943	21036	26439	5.2196	0.4636	Red
9788	Q8IYG6	LRC56_HUMAN	Leucine rich repeat containing protein 56 OS Homo sapiens GN LRRC56 PE 2 SV 1	Regular	112.964	27.98	59303.8	6	2	38	1.29	32791	69114	9985	17.1492	1.017	Red
2161	Q13948	CASP_HUMAN	Protein CASP OS Homo sapiens GN CUX1 PE 1 SV 2	Regular	111.764	28.25	77683.5	6	4	79	1.77	9643	5292	6386	1.3131	0.102	Red
2791	Q03701	CEBPZ_HUMAN	CCAAT enhancer binding protein zeta OS Homo sapiens GN CEBPZ PE 1 SV 3	Regular	111.468	28.32	121601	22	11	81	9.39	40381	26600	25470	6.6002	0.8026	Red
8937	Q719H9	KCTD1_HUMAN	BTB POZ domain containing protein KCTD1 OS Homo sapiens GN KCTD1 PE 1 SV 1	Regular	111.126	28.28	29689.8	9	4	20	8.95	16515	17629.5	9048	4.3744	0.1299	Red
8355	Q8NI35	INADL_HUMAN	InaD like protein OS Homo sapiens GN INADL PE 1 SV 3	Regular	111.064	28.24	197167	29	12	134	5.77	105576	42925	31476	10.6509	2.1	Red	26830
5656	Q8NEV8	EXPH5_HUMAN	Exophilin 5 OS Homo sapiens GN EXPH5 PE 1 SV 3	Regular	110.705	28.4	223888	44	19	175	6.94	171791	91842	59723	22.7886	5.1021	Red	21025 25080 4239 35054 34037
17866	O94826	TOM70_HUMAN	Mitochondrial import receptor subunit TOM70 OS Homo sapiens GN TOMM70A PE 1 SV 1	Regular	110.554	28.36	68139.3	21	7	50	12.66	70077	41392	48264	10.2705	0.6998	Red
6486	P0C091	FREM3_HUMAN	FRAS1 related extracellular matrix protein 3 OS Homo sapiens GN FREM3 PE 2 SV 2	Regular	109.942	28.53	239092	33	11	136	4.53	97004	59096	52884	14.6634	3.5059	Red
9836	O75197	LRP5_HUMAN	Low density lipoprotein receptor related protein 5 OS Homo sapiens GN LRP5 PE 1 SV 2	Regular	109.664	28.59	182395	33	10	102	5.39	165663	64645	35435	16.0403	2.9257	Red	9837
4962	P09884	DPOLA_HUMAN	DNA polymerase alpha catalytic subunit OS Homo sapiens GN POLA1 PE 1 SV 2	Regular	109.504	28.55	167681	26	11	116	4.72	48562	18398	30511	4.5651	0.7655	Red
3773	Q9NR63	CP26B_HUMAN	Cytochrome P450 26B1 OS Homo sapiens GN CYP26B1 PE 1 SV 1	Regular	108.987	28.72	57911.9	7	3	47	8.4	5956	5884.5	4088	1.4601	0.0846	Red
18974	Q8WVS4	WDR60_HUMAN	WD repeat containing protein 60 OS Homo sapiens GN WDR60 PE 1 SV 3	Regular	108.942	28.67	123369	18	12	96	7.6	67581	9652	29130	2.3949	0.2955	Red
16444	Q13813	SPTN1_HUMAN	Spectrin alpha chain non erythrocytic 1 OS Homo sapiens GN SPTAN1 PE 1 SV 3	Regular	108.735	28.74	285338	59	30	272	6.11	196004	39184	77796	9.7227	2.7742	Red	16436
4249	Q8IWT3	CUL9_HUMAN	Cullin 9 OS Homo sapiens GN CUL9 PE 1 SV 2	Regular	108.61	28.69	285621	44	19	173	3.62	139324	28658	62592	7.1109	2.031	Red
17133	O60907	TBL1X_HUMAN	F box like WD repeat containing protein TBL1X OS Homo sapiens GN TBL1X PE 1 SV 3	Regular	108.454	28.65	63294.1	16	6	38	7.28	78717	23327	21646	5.7881	0.3664	Red	1232
13365	Q8TBY8	PMFBP_HUMAN	Polyamine modulated factor 1 binding protein 1 OS Homo sapiens GN PMFBP1 PE 2 SV 1	Regular	107.948	28.71	120573	27	14	129	6.85	68633	17162	33975	4.2584	0.5134	Red
5289	Q9NZN4	EHD2_HUMAN	EH domain containing protein 2 OS Homo sapiens GN EHD2 PE 1 SV 2	Regular	107.871	28.88	61332.6	7	4	45	6.45	32273	7931	14659	1.9679	0.1207	Red
11684	O14511	NRG2_HUMAN	Pro neuregulin 2 membrane bound isoform OS Homo sapiens GN NRG2 PE 1 SV 1	Regular	107.684	28.84	93161.6	15	8	63	4.35	106449	14194.5	27839	3.5221	0.3281	Red
15441	Q8IVG5	SAM9L_HUMAN	Sterile alpha motif domain containing protein 9 like OS Homo sapiens GN SAMD9L PE 1 SV 2	Regular	107.633	28.9	186244	36	16	146	4.67	203734	77792	58469	19.3024	3.595	Red	2666 5113 28254 23044 32636 31365 1511 16071 15448 13566
7348	P38646	GRP75_HUMAN	Stress 70 protein mitochondrial OS Homo sapiens GN HSPA9 PE 1 SV 2	Regular	107.526	28.95	73965.8	15	6	69	10.6	101044	5716	11514	1.4183	0.1049	Green	7899
18069	Q6ZTA4	TRI67_HUMAN	Tripartite motif containing protein 67 OS Homo sapiens GN TRIM67 PE 2 SV 3	Regular	107.369	28.91	85705.2	17	8	54	9.45	365807	345512	33355	85.7314	7.3476	Red
15860	O15357	SHIP2_HUMAN	Phosphatidylinositol 3 4 5 trisphosphate 5 phosphatase 2 OS Homo sapiens GN INPPL1 PE 1 SV 2	Regular	106.971	29.17	139397	22	11	103	4.77	215448	50337.3	38130	12.4901	1.7411	Yellow	32008 1384
17873	Q02880	TOP2B_HUMAN	DNA topoisomerase 2 beta OS Homo sapiens GN TOP2B PE 1 SV 3	Regular	106.926	29.13	184237	29	14	139	4.12	157810	70792.1	27646	17.5655	3.2362	Red	17872
14840	O60518	RNBP6_HUMAN	Ran binding protein 6 OS Homo sapiens GN RANBP6 PE 1 SV 2	Regular	106.734	29.19	126254	28	10	81	5.97	52011	24099	19759	5.9796	0.755	Yellow	8427
8649	Q9Y4F5	K0284_HUMAN	Protein KIAA0284 OS Homo sapiens GN KIAA0284 PE 1 SV 4	Regular	106.678	29.15	172259	23	9	140	3.71	79656	24662	27843	6.1193	1.0541	Red
14402	Q9HAU5	RENT2_HUMAN	Regulator of nonsense transcripts 2 OS Homo sapiens GN UPF2 PE 1 SV 1	Regular	106.622	29.11	149065	30	12	122	1.97	83213	16569	28311	4.1112	0.6128	Red	10475 13712
9825	Q12912	LRMP_HUMAN	Lymphoid restricted membrane protein OS Homo sapiens GN LRMP PE 1 SV 3	Regular	105.859	29.46	62806.2	8	5	55	4.68	89284	10888	9073	2.7016	0.1697	Red
16518	Q05519	SRS11_HUMAN	Serine arginine rich splicing factor 11 OS Homo sapiens GN SRSF11 PE 1 SV 1	Regular	105.801	29.42	53656.3	8	2	31	7.64	13293	19939.5	3361	4.9476	0.2655	Red
3549	Q7Z7A1	CNTRL_HUMAN	Centriolin OS Homo sapiens GN CNTRL PE 1 SV 2	Regular	105.741	29.38	270027	60	29	220	3.05	182480	77956	76759	19.3431	5.2232	Red
7141	Q86SQ4	GP126_HUMAN	G protein coupled receptor 126 OS Homo sapiens GN GPR126 PE 1 SV 3	Regular	105.45	29.63	138748	18	9	75	3.36	67356	33188	59046	8.2349	1.1426	Red
13014	P16234	PGFRA_HUMAN	Platelet derived growth factor receptor alpha OS Homo sapiens GN PDGFRA PE 1 SV 1	Regular	105.201	29.59	123639	21	12	78	9	88411	49761	37581	12.3471	1.5266	Red
7436	Q9Y2T3	GUAD_HUMAN	Guanine deaminase OS Homo sapiens GN GDA PE 1 SV 1	Regular	105.136	29.55	51516.3	23	8	43	7.49	53669	17581.5	26068	4.3625	0.2247	Red
18899	A6NCI4	VWA3A_HUMAN	von Willebrand factor A domain containing protein 3A OS Homo sapiens GN VWA3A PE 2 SV 3	Regular	105.1	29.51	135617	21	12	102	5.74	111168	25135	32965	6.2367	0.8458	Red
9678	Q8WWI1	LMO7_HUMAN	LIM domain only protein 7 OS Homo sapiens GN LMO7 PE 1 SV 3	Regular	105.03	29.47	194122	45	20	173	3.45	146278	26762	80748	6.6404	1.289	Red
11008	P52179	MYOM1_HUMAN	Myomesin 1 OS Homo sapiens GN MYOM1 PE 1 SV 2	Regular	104.931	29.52	189109	34	14	148	2.97	73244	14974	37899	3.7155	0.7026	Red	37716 5526
7616	Q9ULT8	HECD1_HUMAN	E3 ubiquitin protein ligase HECTD1 OS Homo sapiens GN HECTD1 PE 1 SV 3	Regular	104.642	29.48	292407	52	24	210	4.64	223652	130991	99743	32.5026	9.504	Yellow
19986	Q86XU0	ZN677_HUMAN	Zinc finger protein 677 OS Homo sapiens GN ZNF677 PE 2 SV 1	Regular	104.537	29.73	69764.2	5	3	49	6.16	18834	14154	8019	3.512	0.245	Red
10683	P52564	MP2K6_HUMAN	Dual specificity mitogen activated protein kinase kinase 6 OS Homo sapiens GN MAP2K6 PE 1 SV 1	Regular	104.433	29.69	37834.6	7	5	31	16.17	14090	9860	8513	2.4465	0.0926	Red
150	Q676U5	A16L1_HUMAN	Autophagy related protein 16 1 OS Homo sapiens GN ATG16L1 PE 1 SV 2	Regular	104.397	29.65	68949.5	9	4	48	6.43	20717	9903	7264	2.4572	0.1694	Red
18357	Q86XW9	TXND6_HUMAN	Thioredoxin domain containing protein 6 OS Homo sapiens GN NME9 PE 1 SV 1	Regular	103.299	29.99	37255	9	4	33	2.42	67350	164790	63459	40.8891	1.5233	Red
10134	Q92585	MAML1_HUMAN	Mastermind like protein 1 OS Homo sapiens GN MAML1 PE 1 SV 3	Regular	103.256	30.04	108511	14	8	52	6.69	33973	12467	9314	3.0934	0.3357	Red
14163	P04049	RAF1_HUMAN	RAF proto oncogene serine threonine protein kinase OS Homo sapiens GN RAF1 PE 1 SV 1	Regular	103.188	30	73850.1	12	7	53	5.25	55147	5226	16516	1.2967	0.0958	Red
14437	P35250	RFC2_HUMAN	Replication factor C subunit 2 OS Homo sapiens GN RFC2 PE 1 SV 3	Regular	102.95	30.15	39613.6	8	3	29	8.76	4422	4686	5421	1.1627	0.0461	Red
2160	P0CB46	CASPG_HUMAN	Putative caspase 16 OS Homo sapiens GN CASP16 PE 5 SV 1	Regular	102.815	30.11	20460	4	2	15	8.74	4527	5544	5195	1.3756	0.0281	Red
10956	Q9UKX3	MYH13_HUMAN	Myosin 13 OS Homo sapiens GN MYH13 PE 1 SV 2	Regular	102.414	30.07	224746	43	18	160	2.43	120029	42174.2	39869	10.4646	2.3519	Red	10962 10961 10966 10955 10957 10960 10954 10967
18772	P17948	VGFR1_HUMAN	Vascular endothelial growth factor receptor 1 OS Homo sapiens GN FLT1 PE 1 SV 2	Regular	102.379	30.03	152651	29	17	118	4.48	93630	19789	38078	4.9102	0.7495	Red
14496	P0DJD0	RGPD1_HUMAN	RANBP2 like and GRIP domain containing protein 1 OS Homo sapiens GN RGPD1 PE 2 SV 1	Regular	102.037	30.17	198145	47	19	138	3.55	202428	7195.5	50428	1.7854	0.3538	Red	14498 14501 14499 14304
291	P49748	ACADV_HUMAN	Very long chain specific acyl CoA dehydrogenase mitochondrial OS Homo sapiens GN ACADVL PE 1 SV 1	Regular	101.995	30.13	70789.5	12	6	51	4.58	66808	39354	12689	9.7648	0.6912	Red
16316	Q5TCZ1	SPD2A_HUMAN	SH3 and PX domain containing protein 2A OS Homo sapiens GN SH3PXD2A PE 1 SV 1	Regular	101.848	30.18	125974	23	12	109	4.41	127158	68703	37000	17.0472	2.1475	Red
7539	O00219	HAS3_HUMAN	Hyaluronan synthase 3 OS Homo sapiens GN HAS3 PE 1 SV 3	Regular	101.766	30.24	63796.8	11	5	35	6.69	28604	24074	15695	5.9734	0.3811	Red
932	O00213	APBB1_HUMAN	Amyloid beta A4 precursor protein binding family B member 1 OS Homo sapiens GN APBB1 PE 1 SV 2	Regular	101.591	30.29	77985.7	17	6	52	0.99	24841	0	17901			Red	933
17706	P82094	TMF1_HUMAN	TATA element modulatory factor OS Homo sapiens GN TMF1 PE 1 SV 2	Regular	101.523	30.34	123355	37	15	109	5.22	93283	18055	74297	4.48	0.5526	Red
3437	Q8N3K9	CMYA5_HUMAN	Cardiomyopathy associated protein 5 OS Homo sapiens GN CMYA5 PE 1 SV 3	Regular	101.269	30.39	451036	63	29	347	2.53	314758	84561	120974	20.982	9.4636	Yellow
7617	Q5U5R9	HECD2_HUMAN	Probable E3 ubiquitin protein ligase HECTD2 OS Homo sapiens GN HECTD2 PE 2 SV 2	Regular	101.149	30.44	88921	21	6	58	6.96	30357	15554	18241	3.8594	0.3432	Red
4192	O14578	CTRO_HUMAN	Citron Rho interacting kinase OS Homo sapiens GN CIT PE 1 SV 2	Regular	100.99	30.4	233484	37	23	184	8.68	155075	43246	41049	10.7306	2.5054	Red
839	Q9UPS8	ANR26_HUMAN	Ankyrin repeat domain containing protein 26 OS Homo sapiens GN ANKRD26 PE 1 SV 3	Regular	100.844	30.36	197521	30	15	165	6.96	271805	25965	68118	6.4427	1.2726	Red
4062	P61201	CSN2_HUMAN	COP9 signalosome complex subunit 2 OS Homo sapiens GN COPS2 PE 1 SV 1	Regular	100.776	30.32	51881.9	13	7	34	11.06	28681	11489	25429	2.8507	0.1479	Red
18250	Q96AE7	TTC17_HUMAN	Tetratricopeptide repeat protein 17 OS Homo sapiens GN TTC17 PE 1 SV 1	Regular	100.661	30.28	130756	20	7	85	3.33	99166	78368	27909	19.4453	2.5426	Red
17169	Q86XR7	TCAM2_HUMAN	TIR domain containing adapter molecule 2 OS Homo sapiens GN TICAM2 PE 1 SV 1	Regular	100.504	30.24	27144.3	6	3	18	9.79	6527	7165.5	3381	1.778	0.0483	Red
10130	Q9UDY8	MALT1_HUMAN	Mucosa associated lymphoid tissue lymphoma translocation protein 1 OS Homo sapiens GN MALT1 PE 1 SV	Regular	100.391	30.21	93812.3	16	6	57	3.76	36746	19821	15490	4.9182	0.4614	Red
18316	Q9NRJ4	TULP4_HUMAN	Tubby related protein 4 OS Homo sapiens GN TULP4 PE 2 SV 2	Regular	100.113	30.26	170597	25	9	84	4.15	61976	31728	46185	7.8726	1.343	Red
12061	Q01968	OCRL_HUMAN	Inositol polyphosphate 5 phosphatase OCRL 1 OS Homo sapiens GN OCRL PE 1 SV 3	Regular	100.082	30.22	105459	20	11	74	4.22	93441	35191.3	23807	8.732	0.9209	Red	8061
16013	Q68CJ6	SLIP_HUMAN	GTPase SLIP GC OS Homo sapiens GN C8orf80 PE 1 SV 3	Regular	100.078	30.18	91987.4	15	6	58	1.51	35744	46425	12897	11.5194	1.0596	Red
16447	Q9NRC6	SPTN5_HUMAN	Spectrin beta chain non erythrocytic 5 OS Homo sapiens GN SPTBN5 PE 1 SV 1	Regular	99.7715	30.5	419516	77	33	327	4.74	314376	86079	109462	21.3587	8.9603	Red	31327
5486	Q9UF33	EPHA6_HUMAN	Ephrin type A receptor 6 OS Homo sapiens GN EPHA6 PE 2 SV 2	Regular	99.7604	30.46	117770	18	7	75	0.87	41648	8928	27811	2.2153	0.2609	Red
1022	P25098	ARBK1_HUMAN	Beta adrenergic receptor kinase 1 OS Homo sapiens GN ADRBK1 PE 1 SV 2	Regular	99.5709	30.59	80372.2	12	7	58	6.39	37513	26960	10415	6.6895	0.5377	Red
7797	Q1KMD3	HNRL2_HUMAN	Heterogeneous nuclear ribonucleoprotein U like protein 2 OS Homo sapiens GN HNRNPUL2 PE 1 SV 1	Regular	99.2624	30.64	85675.1	19	8	58	6.16	98900	15135	23635	3.7554	0.3217	Red
7727	P13747	HLAE_HUMAN	HLA class I histocompatibility antigen alpha chain E OS Homo sapiens GN HLA E PE 1 SV 3	Regular	98.9646	30.87	40384.9	6	2	26	6.98	7653	11479.5	8216	2.8484	0.115	Red
13695	P78527	PRKDC_HUMAN	DNA dependent protein kinase catalytic subunit OS Homo sapiens GN PRKDC PE 1 SV 3	Regular	98.9368	30.83	474051	86	40	352	4.07	341893	81749	108741	20.2843	9.6158	Red
867	Q92625	ANS1A_HUMAN	Ankyrin repeat and SAM domain containing protein 1A OS Homo sapiens GN ANKS1A PE 1 SV 4	Regular	98.725	30.96	124078	15	7	82	3.17	60912	9394.5	17309	2.331	0.2892	Red
555	Q9UL18	AGO1_HUMAN	Protein argonaute 1 OS Homo sapiens GN EIF2C1 PE 1 SV 3	Regular	98.483	31.09	98355	14	6	70	1.52	57903	108735	14631	26.9803	2.6536	Red
8413	P27987	IP3KB_HUMAN	Inositol trisphosphate 3 kinase B OS Homo sapiens GN ITPKB PE 1 SV 5	Regular	98.3718	31.06	103232	18	9	81	9.73	55163	10678	28556	2.6495	0.2735	Red
13959	O14522	PTPRT_HUMAN	Receptor type tyrosine protein phosphatase T OS Homo sapiens GN PTPRT PE 1 SV 6	Regular	98.311	31.1	163788	25	13	101	4.86	78032	24015	28022	5.9588	0.976	Red
6150	Q9UK96	FBX10_HUMAN	F box only protein 10 OS Homo sapiens GN FBXO10 PE 2 SV 3	Regular	98.2949	31.06	106735	23	6	76	3.45	54923	19913	29799	4.941	0.5274	Red
7109	Q14789	GOGB1_HUMAN	Golgin subfamily B member 1 OS Homo sapiens GN GOLGB1 PE 1 SV 2	Regular	98.2922	31.03	377445	79	40	362	4.51	280788	64101	89989	15.9053	6.0034	Red
11123	Q9H0A0	NAT10_HUMAN	N acetyltransferase 10 OS Homo sapiens GN NAT10 PE 1 SV 2	Regular	98.0086	31.07	116642	30	11	75	6.05	115079	77239	28862	19.1652	2.2355	Red
8307	P40189	IL6RB_HUMAN	Interleukin 6 receptor subunit beta OS Homo sapiens GN IL6ST PE 1 SV 2	Regular	97.9875	31.03	104563	8	5	66	6.54	27286	12380	12107	3.0718	0.3212	Red
4745	Q8TF46	DI3L1_HUMAN	DIS3 like exonuclease 1 OS Homo sapiens GN DIS3L PE 1 SV 2	Regular	97.6692	31.17	122270	21	10	92	5.88	64488	16091	30706	3.9926	0.4882	Red
11499	O15399	NMDE4_HUMAN	Glutamate NMDA receptor subunit epsilon 4 OS Homo sapiens GN GRIN2D PE 2 SV 2	Regular	97.6389	31.13	145178	33	13	82	3.29	135075	16199	52303	4.0194	0.5835	Red	11498
2104	P20807	CAN3_HUMAN	Calpain 3 OS Homo sapiens GN CAPN3 PE 1 SV 2	Regular	97.1445	31.26	95166.2	18	7	63	2.68	38194	28845	21212	7.1573	0.6811	Red
12793	O94913	PCF11_HUMAN	Pre mRNA cleavage complex 2 protein Pcf11 OS Homo sapiens GN PCF11 PE 1 SV 3	Regular	96.9426	31.47	173735	21	12	120	3.54	86369	32768	26142	8.1307	1.4126	Red
5164	Q9Y2J2	E41L3_HUMAN	Band 4 1 like protein 3 OS Homo sapiens GN EPB41L3 PE 1 SV 2	Regular	96.9264	31.43	121533	17	10	91	6.44	22885	7451	16249	1.8488	0.2247	Red	5163
4597	Q7L014	DDX46_HUMAN	Probable ATP dependent RNA helicase DDX46 OS Homo sapiens GN DDX46 PE 1 SV 2	Regular	96.201	31.48	117876	21	13	98	5.43	59048	24278	30008	6.0241	0.7101	Red
20193	O75312	ZPR1_HUMAN	Zinc finger protein ZPR1 OS Homo sapiens GN ZNF259 PE 1 SV 1	Regular	95.588	31.52	51495.7	12	5	34	8.5	15960	11445	15082	2.8398	0.1462	Red
12736	Q9Y5H8	PCDA3_HUMAN	Protocadherin alpha 3 OS Homo sapiens GN PCDHA3 PE 2 SV 1	Regular	95.362	31.48	103113	8	3	63	1.79	43361	9423	28732	2.3381	0.2411	Red	12742 12743
9617	Q86W92	LIPB1_HUMAN	Liprin beta 1 OS Homo sapiens GN PPFIBP1 PE 1 SV 2	Regular	94.9121	31.45	114595	23	8	91	2.97	137151	13333	27156	3.3083	0.3791	Red
10500	Q96T58	MINT_HUMAN	Msx2 interacting protein OS Homo sapiens GN SPEN PE 1 SV 1	Regular	94.8129	31.49	403275	48	21	286	3.52	325770	227704	54943	56.4999	22.785	Yellow
933	Q92870	APBB2_HUMAN	Amyloid beta A4 precursor protein binding family B member 2 OS Homo sapiens GN APBB2 PE 1 SV 3	Regular	94.5177	31.45	84286.3	11	5	67	4.75	111288	97735	22796	24.2508	2.044	Red	932
10753	Q96J65	MRP9_HUMAN	Multidrug resistance associated protein 9 OS Homo sapiens GN ABCC12 PE 1 SV 2	Regular	94.2018	31.5	153723	22	11	99	3.53	84368	51497.6	23543	12.778	1.9643	Red	10750
4903	Q92608	DOCK2_HUMAN	Dedicator of cytokinesis protein 2 OS Homo sapiens GN DOCK2 PE 1 SV 2	Regular	94.0576	31.46	213260	41	18	152	3.77	79919	17735	57892	4.4006	0.9385	Red
5200	Q5VYK3	ECM29_HUMAN	Proteasome associated protein ECM29 homolog OS Homo sapiens GN ECM29 PE 1 SV 2	Regular	93.9872	31.5	206116	33	16	138	3.63	159183	47679	78954	11.8305	2.4385	Red
5525	P28715	ERCC5_HUMAN	DNA repair protein complementing XP G cells OS Homo sapiens GN ERCC5 PE 1 SV 3	Regular	93.8244	31.47	133850	24	9	97	6.16	161276	116367	27662	28.874	3.8648	Red
17432	Q8IVF5	TIAM2_HUMAN	T lymphoma invasion and metastasis inducing protein 2 OS Homo sapiens GN TIAM2 PE 2 SV 4	Regular	93.7598	31.43	191757	33	13	134	3.29	85784	29789	25292	7.3915	1.4174	Red
14304	P49792	RBP2_HUMAN	E3 SUMO protein ligase RanBP2 OS Homo sapiens GN RANBP2 PE 1 SV 2	Regular	93.3989	31.64	362591	55	25	264	2.08	230981	5197.97	61103	1.2898	0.4677	Yellow	14501 14499 14496 14498
13139	Q8TEQ8	PIGO_HUMAN	GPI ethanolamine phosphate transferase 3 OS Homo sapiens GN PIGO PE 2 SV 3	Regular	93.386	31.6	119612	12	5	56	3.86	33892	9688	15189	2.4039	0.2875	Red
20014	Q8N859	ZN713_HUMAN	Zinc finger protein 713 OS Homo sapiens GN ZNF713 PE 2 SV 1	Regular	93.2339	31.64	51141.6	11	5	35	4.65	40643	43110	7620	10.6968	0.5471	Red	20133
7177	O43292	GPAA1_HUMAN	Glycosylphosphatidylinositol anchor attachment 1 protein OS Homo sapiens GN GPAA1 PE 1 SV 3	Regular	92.8732	31.92	67965.5	14	4	31	1.13	44004	9537	17283	2.3664	0.1608	Red
13241	Q6P5Z2	PKN3_HUMAN	Serine threonine protein kinase N3 OS Homo sapiens GN PKN3 PE 1 SV 1	Regular	92.8612	31.89	100504	15	9	65	4.61	129597	19634	27602	4.8718	0.4896	Red
8584	Q14573	ITPR3_HUMAN	Inositol 1 4 5 trisphosphate receptor type 3 OS Homo sapiens GN ITPR3 PE 1 SV 2	Regular	92.7784	31.93	307016	48	23	202	4.53	111091	15438	54392	3.8306	1.1761	Red	36313 8582 8583
3849	P50416	CPT1A_HUMAN	Carnitine O palmitoyltransferase 1 liver isoform OS Homo sapiens GN CPT1A PE 1 SV 2	Regular	92.6511	31.97	89052.2	22	8	55	6.21	57323	18820	26221	4.6698	0.4159	Red
6868	Q06210	GFPT1_HUMAN	Glucosamine fructose 6 phosphate aminotransferase isomerizing 1 OS Homo sapiens GN GFPT1 PE 1 SV	Regular	92.2919	32.01	79605	12	7	62	4.43	38367	26413	22140	6.5538	0.5217	Red
18695	P46939	UTRO_HUMAN	Utrophin OS Homo sapiens GN UTRN PE 1 SV 2	Regular	92.2043	31.98	396691	88	42	280	5.83	277179	45225	116584	11.2216	4.4515	Red
18170	Q6ZSZ6	TSH1_HUMAN	Teashirt homolog 1 OS Homo sapiens GN TSHZ1 PE 2 SV 2	Regular	92.0902	31.94	118886	16	8	89	6.13	174432	126527	46977	31.395	3.7324	Red	18171 18906
18613	Q9NYU1	UGGG2_HUMAN	UDP glucose glycoprotein glucosyltransferase 2 OS Homo sapiens GN UGGT2 PE 1 SV 4	Regular	91.9708	31.9	175363	27	15	128	3.83	219577	43208	87336	10.7211	1.8801	Yellow	18612
14445	O75154	RFIP3_HUMAN	Rab11 family interacting protein 3 OS Homo sapiens GN RAB11FIP3 PE 1 SV 1	Regular	91.9573	31.87	83124.3	10	5	49	2.91	25055	17782.5	22264	4.4123	0.3668	Red
8987	Q96L93	KI16B_HUMAN	Kinesin like protein KIF16B OS Homo sapiens GN KIF16B PE 1 SV 2	Regular	91.8163	31.91	152582	28	13	143	4.78	112351	27972	52078	6.9407	1.059	Red
14199	Q14644	RASA3_HUMAN	Ras GTPase activating protein 3 OS Homo sapiens GN RASA3 PE 1 SV 3	Regular	91.7464	31.95	96896.5	22	11	70	8.27	44939	16174	31025	4.0132	0.3889	Red
14161	P24386	RAE1_HUMAN	Rab proteins geranylgeranyltransferase component A 1 OS Homo sapiens GN CHM PE 1 SV 3	Regular	91.5837	31.91	74787.5	12	5	44	5.21	58410	39357	16320	9.7656	0.7303	Red
761	A6QL64	AN36A_HUMAN	Ankyrin repeat domain containing protein 36A OS Homo sapiens GN ANKRD36 PE 2 SV 3	Regular	91.4894	31.95	219290	32	17	216	1.24	234249	28126	54275	6.9789	1.5304	Red	763 762
10520	Q16659	MK06_HUMAN	Mitogen activated protein kinase 6 OS Homo sapiens GN MAPK6 PE 1 SV 1	Regular	91.341	31.92	83308.3	20	7	51	4.58	37185	12828.8	22709	3.1832	0.2652	Red	14909
3480	Q15021	CND1_HUMAN	Condensin complex subunit 1 OS Homo sapiens GN NCAPD2 PE 1 SV 3	Regular	91.0982	32.04	158608	31	12	115	6.71	67847	29304	40957	7.2712	1.1533	Red
4910	Q9BZ29	DOCK9_HUMAN	Dedicator of cytokinesis protein 9 OS Homo sapiens GN DOCK9 PE 1 SV 2	Regular	90.8214	32.08	238670	42	19	167	3.04	133019	37208.5	37898	9.2325	2.2035	Red	8020 4899
17863	O96008	TOM40_HUMAN	Mitochondrial import receptor subunit TOM40 homolog OS Homo sapiens GN TOMM40 PE 1 SV 1	Regular	90.7791	32.12	38235.3	7	4	21	6.65	35356	23184	13132	5.7526	0.22	Red
5092	Q6XUX3	DUSTY_HUMAN	Dual serine threonine and tyrosine protein kinase OS Homo sapiens GN DSTYK PE 1 SV 2	Regular	90.7432	32.08	106689	16	7	79	3.55	43781	5436	24049	1.3488	0.1439	Red
14917	O95602	RPA1_HUMAN	DNA directed RNA polymerase I subunit RPA1 OS Homo sapiens GN POLR1A PE 1 SV 2	Regular	90.7031	32.05	196808	31	15	134	2.79	108786	28791	33504	7.1439	1.406	Red
17222	Q587J7	TDR12_HUMAN	Tudor domain containing protein 12 OS Homo sapiens GN TDRD12 PE 2 SV 2	Regular	90.5624	32.01	134802	13	5	90	3.06	33795	20281	18177	5.0323	0.6784	Red
15875	Q8TF72	SHRM3_HUMAN	Protein Shroom3 OS Homo sapiens GN SHROOM3 PE 1 SV 2	Regular	90.5516	31.97	218454	48	23	174	5.26	152110	51240	57590	12.7141	2.7775	Red	15874
11438	Q6KC79	NIPBL_HUMAN	Nipped B like protein OS Homo sapiens GN NIPBL PE 1 SV 2	Regular	90.2123	32.17	318105	33	17	214	5.03	325606	61146	43469	15.1721	4.8263	Red
10689	O75970	MPDZ_HUMAN	Multiple PDZ domain protein OS Homo sapiens GN MPDZ PE 1 SV 2	Regular	90.1011	32.21	222930	31	14	145	4.11	135330	68735	51193	17.0551	3.8021	Red	34728
2654	Q13042	CDC16_HUMAN	Cell division cycle protein 16 homolog OS Homo sapiens GN CDC16 PE 1 SV 2	Regular	89.8254	32.4	72454.2	18	5	45	5.81	26641	9163.5	12064	2.2737	0.1647	Red
3616	O75128	COBL_HUMAN	Protein cordon bleu OS Homo sapiens GN COBL PE 1 SV 2	Regular	89.7883	32.36	136529	15	9	98	6.74	70172	35197	16128	8.7334	1.1924	Red	9166
1051	Q92974	ARHG2_HUMAN	Rho guanine nucleotide exchange factor 2 OS Homo sapiens GN ARHGEF2 PE 1 SV 4	Regular	89.7095	32.33	112455	22	11	99	2.33	45905	7531.5	28657	1.8688	0.2102	Red
20087	Q9Y2P0	ZN835_HUMAN	Zinc finger protein 835 OS Homo sapiens GN ZNF835 PE 2 SV 2	Regular	89.2746	32.59	61626.6	6	3	41	3.54	12010	20937	6717	5.1951	0.3202	Red
10646	Q14149	MORC3_HUMAN	MORC family CW type zinc finger protein 3 OS Homo sapiens GN MORC3 PE 1 SV 3	Regular	88.9987	32.56	108311	15	6	69	5.43	104106	90185	36336	22.3775	2.4237	Red
10566	Q96A32	MLRS_HUMAN	Myosin regulatory light chain 2 skeletal muscle isoform OS Homo sapiens GN MYLPF PE 2 SV 1	Regular	88.9825	32.52	19128.7	11	4	23	10.06	8275	7701	8359	1.9108	0.0366	Red
12641	Q9BWT3	PAPOG_HUMAN	Poly A polymerase gamma OS Homo sapiens GN PAPOLG PE 1 SV 2	Regular	88.9447	32.56	83144.9	16	8	59	7.07	152716	127784	40369	31.7069	2.6363	Red
9166	P05771	KPCB_HUMAN	Protein kinase C beta type OS Homo sapiens GN PRKCB PE 1 SV 4	Regular	88.8926	32.52	78009.7	28	14	59	9.24	73286	19997	31079	4.9618	0.3871	Red	3616 10546
2165	Q9NQ75	CASS4_HUMAN	Cas scaffolding protein family member 4 OS Homo sapiens GN CASS4 PE 1 SV 2	Regular	88.8804	32.49	87942.9	21	11	70	3.82	145823	6594	35836	1.6362	0.1439	Red
3167	Q9H943	CJ068_HUMAN	Uncharacterized protein C10orf68 OS Homo sapiens GN C10orf68 PE 2 SV 2	Regular	88.8237	32.45	71535.2	12	8	72	1.91	63738	31122	22247	7.7223	0.5524	Red
13354	Q9Y4D7	PLXD1_HUMAN	Plexin D1 OS Homo sapiens GN PLXND1 PE 1 SV 3	Regular	88.631	32.41	215429	42	16	131	5.14	213897	46733	64495	11.5958	2.4981	Red
8660	Q9Y4D8	K0614_HUMAN	Probable E3 ubiquitin protein ligase C12orf51 OS Homo sapiens GN C12orf51 PE 1 SV 5	Regular	88.5859	32.38	444990	69	30	277	4.08	225773	63988	127363	15.8773	7.0652	Yellow
16993	O75410	TACC1_HUMAN	Transforming acidic coiled coil containing protein 1 OS Homo sapiens GN TACC1 PE 1 SV 2	Regular	88.5639	32.34	88649.8	17	9	68	6.46	80213	11567	34902	2.8701	0.2544	Red
6804	Q9BSJ2	GCP2_HUMAN	Gamma tubulin complex component 2 OS Homo sapiens GN TUBGCP2 PE 1 SV 2	Regular	88.4469	32.31	103162	16	8	70	5.99	52734	30133	19175	7.4769	0.7713	Red
10930	Q8IUG5	MY18B_HUMAN	Unconventional myosin XVIIIb OS Homo sapiens GN MYO18B PE 1 SV 1	Regular	88.4309	32.27	287352	36	20	236	3.93	106262	34432	55095	8.5436	2.455	Red
14329	P18754	RCC1_HUMAN	Regulator of chromosome condensation OS Homo sapiens GN RCC1 PE 1 SV 1	Regular	88.2787	32.31	45425.3	8	2	26	6.41	14797	22195.5	7435	5.5073	0.2502	Red
4802	Q8TDM6	DLG5_HUMAN	Disks large homolog 5 OS Homo sapiens GN DLG5 PE 1 SV 4	Regular	88.0334	32.35	215579	34	18	196	5.47	160279	42271	30548	10.4886	2.2611	Red
8615	Q15652	JHD2C_HUMAN	Probable JmjC domain containing histone demethylation protein 2C OS Homo sapiens GN JMJD1C PE 1 SV 2	Regular	87.9951	32.31	286578	43	21	202	3.27	148262	35575	69770	8.8272	2.5297	Yellow
14820	Q63HN8	RN213_HUMAN	E3 ubiquitin protein ligase RNF213 OS Homo sapiens GN RNF213 PE 1 SV 3	Regular	87.753	32.57	598936	95	41	438	3.23	198800	31884	115078	7.9113	4.7384	Red
1232	Q8IZT6	ASPM_HUMAN	Abnormal spindle like microcephaly associated protein OS Homo sapiens GN ASPM PE 1 SV 2	Regular	87.533	32.76	413451	86	35	265	4.37	239275	65101	126834	16.1534	6.6786	Red	17133
13195	P42336	PK3CA_HUMAN	Phosphatidylinositol 4 5 bisphosphate 3 kinase catalytic subunit alpha isoform OS Homo sapiens GN PI	Regular	87.2514	32.79	126109	28	13	102	3.46	113532	33794	36722	8.3853	1.0575	Red
8136	Q04637	IF4G1_HUMAN	Eukaryotic translation initiation factor 4 gamma 1 OS Homo sapiens GN EIF4G1 PE 1 SV 4	Regular	87.2177	32.9	176233	23	10	121	3.81	51180	27378	28531	6.7933	1.1972	Red
763	Q5JPF3	AN36C_HUMAN	Ankyrin repeat domain containing protein 36C OS Homo sapiens GN ANKRD36C PE 2 SV 3	Regular	87.0328	32.87	201516	29	16	187	2.98	230763	16286	33362	4.041	0.8143	Red	761 762
18463	Q9C0C9	UBE2O_HUMAN	Ubiquitin conjugating enzyme E2 O OS Homo sapiens GN UBE2O PE 1 SV 3	Regular	86.6428	33.12	142719	13	6	87	2.55	60508	12769.5	27886	3.1685	0.4522	Red
1260	P05023	AT1A1_HUMAN	Sodium potassium transporting ATPase subunit alpha 1 OS Homo sapiens GN ATP1A1 PE 1 SV 1	Regular	86.2406	33.37	114208	13	6	71	5.18	23933	8649	6286	2.1461	0.2451	Red	1261 1262
13378	Q6XQN6	PNCB_HUMAN	Nicotinate phosphoribosyltransferase OS Homo sapiens GN NAPRT1 PE 1 SV 2	Regular	86.2212	33.33	58148.6	7	4	36	5.2	23049	7143	9851	1.7724	0.1031	Red
5488	P29322	EPHA8_HUMAN	Ephrin type A receptor 8 OS Homo sapiens GN EPHA8 PE 1 SV 2	Regular	86.0069	33.37	112771	12	7	79	1.49	56209	6807	17734	1.689	0.1905	Red	5485 5487
7379	Q92896	GSLG1_HUMAN	Golgi apparatus protein 1 OS Homo sapiens GN GLG1 PE 1 SV 2	Regular	85.151	33.61	138430	36	15	95	2.88	97992	15102	53281	3.7472	0.5187	Red
15172	Q92736	RYR2_HUMAN	Ryanodine receptor 2 OS Homo sapiens GN RYR2 PE 1 SV 3	Regular	85.1294	33.58	569701	75	38	397	3.68	268273	34464	93260	8.5515	4.8718	Red	15173 10964 15171 37255
12857	Q14432	PDE3A_HUMAN	cGMP inhibited 3 5 cyclic phosphodiesterase A OS Homo sapiens GN PDE3A PE 1 SV 3	Regular	84.5493	33.75	126519	21	10	78	6.66	42319	13794	21845	3.4227	0.433	Red
14413	Q13127	REST_HUMAN	RE1 silencing transcription factor OS Homo sapiens GN REST PE 1 SV 3	Regular	84.2622	33.92	123241	8	6	98	4.28	31105	18696	12024	4.639	0.5717	Red
1020	Q8WWN8	ARAP3_HUMAN	Arf GAP with Rho GAP domain ANK repeat and PH domain containing protein 3 OS Homo sapiens GN ARAP3	Regular	84.2532	33.89	171612	24	11	111	3.04	92451	18794	26207	4.6633	0.8003	Red
6036	A6ND36	FA83G_HUMAN	Protein FAM83G OS Homo sapiens GN FAM83G PE 1 SV 2	Regular	84.2357	33.85	91120.3	12	6	74	2.79	71518	27216	27175	6.7531	0.6153	Red
413	O14672	ADA10_HUMAN	Disintegrin and metalloproteinase domain containing protein 10 OS Homo sapiens GN ADAM10 PE 1 SV 1	Regular	84.2177	33.82	86195.2	22	12	64	8.02	65040	15429	26213	3.8284	0.33	Red	12655
15661	O15041	SEM3E_HUMAN	Semaphorin 3E OS Homo sapiens GN SEMA3E PE 2 SV 1	Regular	84.0876	33.85	90425.2	5	4	63	3.74	10823	10768.5	7107	2.672	0.2416	Red
19130	Q6P2D8	XRRA1_HUMAN	X ray radiation resistance associated protein 1 OS Homo sapiens GN XRRA1 PE 2 SV 2	Regular	83.9447	33.89	90548.2	13	10	69	7.07	106831	25406	21798	6.304	0.5708	Red
13073	Q8WWQ0	PHIP_HUMAN	PH interacting protein OS Homo sapiens GN PHIP PE 1 SV 2	Regular	83.9061	33.85	208457	27	12	136	3.51	110789	39150	43126	9.7142	2.025	Red	1762
12535	Q96C36	P5CR2_HUMAN	Pyrroline 5 carboxylate reductase 2 OS Homo sapiens GN PYCR2 PE 1 SV 1	Regular	83.8642	33.82	33979.4	7	4	23	11.25	13695	5055	5384	1.2543	0.0426	Red
902	O94973	AP2A2_HUMAN	AP 2 complex subunit alpha 2 OS Homo sapiens GN AP2A2 PE 1 SV 2	Regular	83.7923	33.78	104873	22	6	58	2.56	191934	30385.5	29651	7.5395	0.7907	Red
7692	Q6NVY1	HIBCH_HUMAN	3 hydroxyisobutyryl CoA hydrolase mitochondrial OS Homo sapiens GN HIBCH PE 1 SV 2	Regular	83.7367	33.81	43824.5	13	4	32	5.7	23445	11440.5	17562	2.8387	0.1244	Red
5778	Q5VUB5	F1711_HUMAN	Protein FAM171A1 OS Homo sapiens GN FAM171A1 PE 1 SV 1	Regular	83.6965	33.78	98538.6	15	6	60	4.04	33710	33930	26260	8.419	0.8296	Red
3012	Q8TD26	CHD6_HUMAN	Chromodomain helicase DNA binding protein 6 OS Homo sapiens GN CHD6 PE 1 SV 4	Regular	83.6946	33.74	308264	48	24	227	3.87	130016	35590	52806	8.8309	2.7222	Red	3015 3013 3014
19423	Q9UGR2	Z3H7B_HUMAN	Zinc finger CCCH domain containing protein 7B OS Homo sapiens GN ZC3H7B PE 1 SV 1	Regular	83.694	33.71	113460	22	11	84	7.96	325984	25334	93806	6.2861	0.7132	Red
8967	Q6ZMT4	KDM7_HUMAN	Lysine specific demethylase 7 OS Homo sapiens GN JHDM1D PE 1 SV 2	Regular	83.4731	33.74	107869	20	9	72	6.16	108851	64572	32022	16.0222	1.7283	Red
5625	Q92817	EVPL_HUMAN	Envoplakin OS Homo sapiens GN EVPL PE 1 SV 3	Regular	83.414	33.78	232916	41	21	210	6.25	358399	93673	56984	23.2429	5.4137	Red
285	O00763	ACACB_HUMAN	Acetyl CoA carboxylase 2 OS Homo sapiens GN ACACB PE 1 SV 3	Regular	83.3375	33.81	278537	27	15	182	4.43	63910	22319.8	23386	5.5382	1.5426	Red	284
18355	Q8N427	TXND3_HUMAN	Thioredoxin domain containing protein 3 OS Homo sapiens GN NME8 PE 1 SV 2	Regular	83.1477	34.04	67726.3	3	4	54	4.42	10743	11889	3723	2.95	0.1998	Red
14909	P08922	ROS1_HUMAN	Proto oncogene tyrosine protein kinase ROS OS Homo sapiens GN ROS1 PE 1 SV 3	Regular	83.0892	34.01	266710	27	12	145	3.49	46657	14418.2	34740	3.5776	0.9542	Red	10520
4589	Q96GQ7	DDX27_HUMAN	Probable ATP dependent RNA helicase DDX27 OS Homo sapiens GN DDX27 PE 1 SV 2	Regular	82.8021	34.18	90348.7	6	4	73	1.88	28492	35865	9716	8.8991	0.804	Red
11825	Q7Z3B4	NUP54_HUMAN	Nucleoporin p54 OS Homo sapiens GN NUP54 PE 1 SV 2	Regular	82.6855	34.21	55549.6	6	2	35	4.54	20194	2787	5772	0.6915	0.0384	Red
18146	Q16881	TRXR1_HUMAN	Thioredoxin reductase 1 cytoplasmic OS Homo sapiens GN TXNRD1 PE 1 SV 3	Regular	82.4624	34.24	71725.6	11	3	40	3.39	6260	6310.5	9318	1.5658	0.1123	Red
18417	Q9BZF9	UACA_HUMAN	Uveal autoantigen with coiled coil domains and ankyrin repeats OS Homo sapiens GN UACA PE 1 SV 2	Regular	82.3425	34.21	163646	39	18	161	4.94	197380	19766	52460	4.9045	0.8026	Red
10071	Q8WXG6	MADD_HUMAN	MAP kinase activating death domain protein OS Homo sapiens GN MADD PE 1 SV 2	Regular	82.3357	34.17	184615	31	11	120	3.95	134506	44620	50538	11.0715	2.044	Red
17047	Q9H2D6	TARA_HUMAN	TRIO and F actin binding protein OS Homo sapiens GN TRIOBP PE 1 SV 3	Regular	82.3066	34.14	264284	38	22	220	4.1	148100	44803	55601	11.1169	2.938	Red
5616	P57679	EVC_HUMAN	Ellis van Creveld syndrome protein OS Homo sapiens GN EVC PE 1 SV 1	Regular	82.2827	34.1	112960	20	8	80	5.75	74577	44054.4	46476	10.9312	1.2348	Red	3593
19458	P86452	ZBED6_HUMAN	Zinc finger BED domain containing protein 6 OS Homo sapiens GN ZBED6 PE 3 SV 1	Regular	82.1445	34.13	111456	10	6	62	2.35	43680	28431	25040	7.0545	0.7863	Red
7796	Q9BUJ2	HNRL1_HUMAN	Heterogeneous nuclear ribonucleoprotein U like protein 1 OS Homo sapiens GN HNRNPUL1 PE 1 SV 2	Regular	82.1222	34.1	96308.9	19	6	55	5.96	504955	488646	119386	121.247	11.6772	Red
15171	P21817	RYR1_HUMAN	Ryanodine receptor 1 OS Homo sapiens GN RYR1 PE 1 SV 3	Regular	82.0027	34.13	570879	55	28	357	1.83	201290	25042	78385	6.2136	3.5472	Red	15173 7409 15172 10964 13126 37255
8543	P23229	ITA6_HUMAN	Integrin alpha 6 OS Homo sapiens GN ITGA6 PE 1 SV 4	Regular	81.9159	34.1	127830	28	14	95	3.36	46877	6763	20450	1.6781	0.2145	Red
10821	Q13330	MTA1_HUMAN	Metastasis associated protein MTA1 OS Homo sapiens GN MTA1 PE 1 SV 2	Regular	81.8829	34.06	81470.6	13	9	65	3.08	47790	25240.5	18166	6.2629	0.5102	Red
3983	Q5TZA2	CROCC_HUMAN	Rootletin OS Homo sapiens GN CROCC PE 1 SV 1	Regular	81.8711	34.03	228923	53	31	219	4.12	180263	33801	66749	8.387	1.92	Red	38376 27350 30251
10746	P33527	MRP1_HUMAN	Multidrug resistance associated protein 1 OS Homo sapiens GN ABCC1 PE 1 SV 3	Regular	81.8532	34	173017	33	16	104	2.68	192496	13840	26454	3.4341	0.5942	Red
2094	Q9P1Y5	CAMP3_HUMAN	Calmodulin regulated spectrin associated protein 3 OS Homo sapiens GN CAMSAP3 PE 1 SV 2	Regular	81.8367	34.03	135548	17	4	89	1.68	20229	7384.34	15614	1.8323	0.2484	Red	2092
9819	Q96JM4	LRIQ1_HUMAN	Leucine rich repeat and IQ domain containing protein 1 OS Homo sapiens GN LRRIQ1 PE 2 SV 3	Regular	81.8092	33.99	201411	30	15	161	4.12	102519	14440	42675	3.583	0.7216	Red
10003	Q8N653	LZTR1_HUMAN	Leucine zipper like transcriptional regulator 1 OS Homo sapiens GN LZTR1 PE 2 SV 2	Regular	81.6614	33.96	95973.7	13	6	72	6.07	84893	62348	27542	15.4703	1.4847	Red
13566	Q5T8A7	PPR26_HUMAN	Protein phosphatase 1 regulatory subunit 26 OS Homo sapiens GN PPP1R26 PE 1 SV 1	Regular	81.5148	33.99	128435	16	10	106	6.53	55856	17538	17502	4.3517	0.5589	Red	2666 5113 28254 15441 23044 32636 31365 1511 16071
14263	Q96PK6	RBM14_HUMAN	RNA binding protein 14 OS Homo sapiens GN RBM14 PE 1 SV 2	Regular	81.0157	34.02	69662.8	11	7	39	7.62	84355	30977	28317	7.6863	0.5354	Red
9300	Q15418	KS6A1_HUMAN	Ribosomal protein S6 kinase alpha 1 OS Homo sapiens GN RPS6KA1 PE 1 SV 2	Regular	80.8938	34.12	83122.3	16	10	70	3.95	89849	20041	12397	4.9727	0.4133	Red	9301
15485	Q9Y2G9	SBNO2_HUMAN	Protein strawberry notch homolog 2 OS Homo sapiens GN SBNO2 PE 2 SV 3	Regular	80.4289	34.15	151644	12	5	88	3.07	30842	21650	9354	5.372	0.8146	Red
7841	Q9UPZ3	HPS5_HUMAN	Hermansky Pudlak syndrome 5 protein OS Homo sapiens GN HPS5 PE 1 SV 2	Regular	80.3571	34.18	129388	27	11	90	2.83	79151	11835	34716	2.9366	0.38	Red
11206	O75376	NCOR1_HUMAN	Nuclear receptor corepressor 1 OS Homo sapiens GN NCOR1 PE 1 SV 2	Regular	79.9405	34.66	271123	38	21	206	4.3	289783	125338	81304	31.0999	8.4319	Red	11207
3168	Q711Q0	CJ071_HUMAN	Uncharacterized protein C10orf71 OS Homo sapiens GN C10orf71 PE 2 SV 2	Regular	79.9281	34.63	157845	20	10	119	1.74	80968	41912	32008	10.3996	1.6415	Red
4759	Q9P265	DIP2B_HUMAN	Disco interacting protein 2 homolog B OS Homo sapiens GN DIP2B PE 1 SV 3	Regular	79.4568	34.85	173716	17	7	111	4.38	70693	53961	37620	13.3893	2.3259	Red
4422	Q5VWQ8	DAB2P_HUMAN	Disabled homolog 2 interacting protein OS Homo sapiens GN DAB2IP PE 1 SV 2	Regular	79.3614	34.94	132595	14	12	105	5.3	65841	30515	23955	7.5716	1.004	Red
20199	A6NJL1	ZSA5B_HUMAN	Zinc finger and SCAN domain containing protein 5B OS Homo sapiens GN ZSCAN5B PE 2 SV 1	Regular	79.1696	34.9	56681.4	14	5	58	6.46	68317	75762	28918	18.7987	1.0655	Red
13299	Q15149	PLEC_HUMAN	Plectin OS Homo sapiens GN PLEC PE 1 SV 3	Regular	78.767	35	533787	102	49	468	3.71	812600	82370	201468	20.4383	10.9097	Red	10271 12882 5497 21443 39279
16758	Q15022	SUZ12_HUMAN	Polycomb protein SUZ12 OS Homo sapiens GN SUZ12 PE 1 SV 3	Regular	78.7214	35.02	83796.3	15	8	58	2.98	46014	4401	14841	1.092	0.0915	Red
11189	O14513	NCKP5_HUMAN	Nck associated protein 5 OS Homo sapiens GN NCKAP5 PE 2 SV 2	Regular	78.6611	34.99	210362	33	17	149	3.04	85318	14791	28068	3.6701	0.772	Red
15659	Q99985	SEM3C_HUMAN	Semaphorin 3C OS Homo sapiens GN SEMA3C PE 1 SV 2	Regular	78.6355	34.96	86518.8	16	10	55	1.86	43682	26658	18144	6.6146	0.5723	Red
10962	Q9Y623	MYH4_HUMAN	Myosin 4 OS Homo sapiens GN MYH4 PE 1 SV 2	Regular	78.57	34.92	224041	50	22	163	4.28	152988	5587.72	80643	1.3865	0.3106	Red	10961 10966 10955 10956 10957 10960 10954 10967
18128	Q9HCF6	TRPM3_HUMAN	Transient receptor potential cation channel subfamily M member 3 OS Homo sapiens GN TRPM3 PE 2 SV 4	Regular	78.4386	34.95	199282	32	19	139	5.77	257831	130228	105625	32.3133	6.4395	Red
18525	Q70EL4	UBP43_HUMAN	Ubiquitin carboxyl terminal hydrolase 43 OS Homo sapiens GN USP43 PE 1 SV 2	Regular	78.1982	35.17	124121	25	10	79	4.99	117027	67208	37402	16.6762	2.0699	Red
14501	O14715	RGPD8_HUMAN	RANBP2 like and GRIP domain containing protein 8 OS Homo sapiens GN RGPD8 PE 1 SV 2	Regular	77.8924	35.32	200305	49	21	136	4.31	168702	10239	49861	2.5406	0.5089	Red	14498 14499 14496 6788 14304
4905	Q8N1I0	DOCK4_HUMAN	Dedicator of cytokinesis protein 4 OS Homo sapiens GN DOCK4 PE 1 SV 3	Regular	77.8499	35.28	227032	28	15	168	2.54	174296	34365	32350	8.5269	1.9359	Red
14564	Q5T5U3	RHG21_HUMAN	Rho GTPase activating protein 21 OS Homo sapiens GN ARHGAP21 PE 1 SV 1	Regular	77.7925	35.25	218700	57	24	170	4.19	172222	26065	101104	6.4675	1.4144	Red
13944	P23467	PTPRB_HUMAN	Receptor type tyrosine protein phosphatase beta OS Homo sapiens GN PTPRB PE 1 SV 3	Regular	77.6666	35.28	225727	24	11	156	3.36	118454	10606	34031	2.6317	0.594	Red
16098	A8MU46	SMTL1_HUMAN	Smoothelin like protein 1 OS Homo sapiens GN SMTNL1 PE 1 SV 1	Regular	77.6481	35.24	49237.7	12	6	38	6.13	20801	10531	8139	2.613	0.1287	Red
3450	Q9H972	CN093_HUMAN	Uncharacterized protein C14orf93 OS Homo sapiens GN C14orf93 PE 2 SV 1	Regular	77.6142	35.27	59381.1	9	4	38	4.28	27204	13755	17556	3.413	0.2027	Red
17451	Q8IY51	TIGD4_HUMAN	Tigger transposable element derived protein 4 OS Homo sapiens GN TIGD4 PE 1 SV 2	Regular	77.6029	35.24	58152.2	8	6	43	2.15	30084	29115	10563	7.2243	0.4201	Red
4070	P13611	CSPG2_HUMAN	Versican core protein OS Homo sapiens GN VCAN PE 1 SV 3	Regular	77.4511	35.27	374816	51	24	199	3.89	193582	61111	85207	15.1634	5.6835	Red
10961	P11055	MYH3_HUMAN	Myosin 3 OS Homo sapiens GN MYH3 PE 1 SV 3	Regular	77.2633	35.47	224989	41	17	158	4.28	105291	10744	36195	2.6659	0.5998	Red	10962 10966 10955 10956 10957 10960 10954 10967
1303	Q9NVI7	ATD3A_HUMAN	ATPase family AAA domain containing protein 3A OS Homo sapiens GN ATAD3A PE 1 SV 2	Regular	77.2389	35.44	71654.4	17	6	56	9.15	60978	42956	21052	10.6586	0.7637	Red
9774	Q15345	LRC41_HUMAN	Leucine rich repeat containing protein 41 OS Homo sapiens GN LRRC41 PE 1 SV 3	Regular	77.2188	35.41	89790.2	12	9	59	7.02	63558	23770	12983	5.898	0.5296	Red
17272	P22105	TENX_HUMAN	Tenascin X OS Homo sapiens GN TNXB PE 1 SV 3	Regular	76.72	35.73	471340	50	24	325	2.56	123214	21658	70681	5.374	2.533	Red
18322	Q5VYS8	TUT7_HUMAN	Terminal uridylyltransferase 7 OS Homo sapiens GN ZCCHC6 PE 1 SV 1	Regular	76.6297	35.7	173396	28	14	147	5.22	74301	15088	23155	3.7438	0.6492	Red	18321
18606	O94874	UFL1_HUMAN	E3 UFM1 protein ligase 1 OS Homo sapiens GN UFL1 PE 1 SV 2	Regular	76.6156	35.67	90051.6	22	11	74	6.93	208550	14444	32561	3.584	0.3227	Red
18491	P51784	UBP11_HUMAN	Ubiquitin carboxyl terminal hydrolase 11 OS Homo sapiens GN USP11 PE 1 SV 3	Regular	76.4696	35.64	111014	11	5	90	3.43	28453	19975	21775	4.9564	0.5502	Red
6582	P51114	FXR1_HUMAN	Fragile X mental retardation syndrome related protein 1 OS Homo sapiens GN FXR1 PE 1 SV 3	Regular	76.4569	35.6	70063.1	7	4	58	1.61	12962	5049	6399	1.2528	0.0878	Red
9290	Q92764	KRT35_HUMAN	Keratin type I cuticular Ha5 OS Homo sapiens GN KRT35 PE 2 SV 5	Regular	76.4153	35.57	51672.4	12	6	41	5.05	47467	47622	15642	11.8164	0.6106	Red
11386	Q12986	NFX1_HUMAN	Transcriptional repressor NF X1 OS Homo sapiens GN NFX1 PE 1 SV 2	Regular	76.3281	35.54	130097	15	7	91	2.23	75898	39721.5	18495	9.856	1.2822	Red
16911	Q6ZVK1	T179A_HUMAN	Transmembrane protein 179 OS Homo sapiens GN TMEM179 PE 2 SV 2	Regular	76.2407	35.5	26776.8	9	2	13	9.44	18041	10440	12841	2.5905	0.0694	Red
17932	P29144	TPP2_HUMAN	Tripeptidyl peptidase 2 OS Homo sapiens GN TPP2 PE 1 SV 4	Regular	76.1745	35.53	139833	22	11	114	2.08	67884	11907	25884	2.9545	0.4131	Red
762	Q8N2N9	AN36B_HUMAN	Ankyrin repeat domain containing protein 36B OS Homo sapiens GN ANKRD36B PE 2 SV 4	Regular	75.9995	35.5	155122	24	15	154	2.88	202026	39936	54838	9.9093	1.5371	Red	763 761
18790	P18206	VINC_HUMAN	Vinculin OS Homo sapiens GN VCL PE 1 SV 4	Regular	75.9166	35.53	124370	28	15	107	8.73	44549	18465	25429	4.5817	0.5698	Red
6006	Q96MK2	FA65C_HUMAN	Protein FAM65C OS Homo sapiens GN FAM65C PE 2 SV 4	Regular	75.8776	35.55	106659	18	8	68	4.33	33319	5063	24548	1.2563	0.134	Red
16217	O94964	SOGA1_HUMAN	Protein SOGA1 OS Homo sapiens GN SOGA1 PE 1 SV 2	Regular	75.8417	35.58	161300	31	16	147	5.97	120589	47959	48667	11.9	1.9195	Red	10954 16218
4369	Q7L576	CYFP1_HUMAN	Cytoplasmic FMR1 interacting protein 1 OS Homo sapiens GN CYFIP1 PE 1 SV 1	Regular	75.7008	35.55	146837	31	11	95	3.35	147142	23501.8	30034	5.8315	0.8563	Red	4370
4153	P0CG12	CTF8A_HUMAN	Chromosome transmission fidelity protein 8 homolog isoform 2 OS Homo sapiens GN CHTF8 PE 2 SV 1	Regular	75.1835	35.8	51391.5	3	3	28	2.29	12138	12840	4992	3.186	0.1637	Red
16445	O15020	SPTN2_HUMAN	Spectrin beta chain non erythrocytic 2 OS Homo sapiens GN SPTBN2 PE 1 SV 3	Regular	75.156	35.77	272694	45	21	221	3.77	202824	69421	64939	17.2253	4.6972	Red	16438 16439 16446
4166	O43310	CTIF_HUMAN	CBP80 20 dependent translation initiation factor OS Homo sapiens GN CTIF PE 1 SV 1	Regular	75.1226	35.8	68157.1	9	4	57	2.84	10133	6175.5	5210	1.5323	0.1044	Red
13352	Q9ULL4	PLXB3_HUMAN	Plexin B3 OS Homo sapiens GN PLXNB3 PE 1 SV 2	Regular	75.0134	35.77	210440	24	9	106	3.61	65472	44802	31496	11.1167	2.3394	Red
3652	Q8NFW1	COMA1_HUMAN	Collagen alpha 1 XXII chain OS Homo sapiens GN COL22A1 PE 1 SV 2	Regular	74.9107	35.79	162172	17	11	109	2.64	170580	24779	41171	6.1484	0.9971	Red
4638	Q68D51	DEN2C_HUMAN	DENN domain containing protein 2C OS Homo sapiens GN DENND2C PE 2 SV 2	Regular	74.8528	35.82	108177	20	7	81	1.4	41584	14859	41702	3.6869	0.3988	Red
11304	Q8TAT5	NEIL3_HUMAN	Endonuclease 8 like 3 OS Homo sapiens GN NEIL3 PE 1 SV 3	Regular	74.8093	35.78	69308.9	13	6	52	5.79	67719	27710	20588	6.8756	0.4765	Red
17114	Q86TI0	TBCD1_HUMAN	TBC1 domain family member 1 OS Homo sapiens GN TBC1D1 PE 1 SV 2	Regular	74.7163	35.81	134396	18	9	98	5.65	72820	10425	21435	2.5867	0.3476	Red
5061	Q9NRD9	DUOX1_HUMAN	Dual oxidase 1 OS Homo sapiens GN DUOX1 PE 1 SV 1	Regular	74.5616	35.84	178832	27	13	136	4.19	113702	67261	44304	16.6894	2.9846	Red
19134	Q86Y38	XYLT1_HUMAN	Xylosyltransferase 1 OS Homo sapiens GN XYLT1 PE 1 SV 1	Regular	74.3856	36.09	108425	17	8	73	1.56	330036	438156	93421	108.719	11.7878	Red
11022	Q86TC9	MYPN_HUMAN	Myopalladin OS Homo sapiens GN MYPN PE 1 SV 2	Regular	74.1206	36.28	146797	19	10	102	5.3	94500	40889	37992	10.1457	1.4894	Red
9741	Q8ND23	LR16B_HUMAN	Leucine rich repeat containing protein 16B OS Homo sapiens GN LRRC16B PE 2 SV 2	Regular	74.1002	36.31	151827	22	10	99	2.62	70868	14145	29560	3.5098	0.5329	Red
16436	P02549	SPTA1_HUMAN	Spectrin alpha chain erythrocytic 1 OS Homo sapiens GN SPTA1 PE 1 SV 5	Regular	74.0455	36.28	281212	52	28	234	5.29	104069	26866	56055	6.6662	1.8746	Red	16444
3771	Q9BV73	CP250_HUMAN	Centrosome associated protein CEP250 OS Homo sapiens GN CEP250 PE 1 SV 2	Regular	73.6602	36.58	282050	54	26	280	6.76	173567	34936	58040	8.6686	2.445	Red
10966	P13535	MYH8_HUMAN	Myosin 8 OS Homo sapiens GN MYH8 PE 1 SV 3	Regular	73.5701	36.6	223732	35	17	158	3.56	124605	17208.7	56956	4.27	0.9553	Red	10962 10961 10955 10956 10957 10960 10954 10967
19579	Q86UP3	ZFHX4_HUMAN	Zinc finger homeobox protein 4 OS Homo sapiens GN ZFHX4 PE 1 SV 1	Regular	73.5442	36.57	398407	45	19	254	3.95	164812	82884	69849	20.5659	8.1936	Red	19578 15741
18985	Q3MJ13	WDR72_HUMAN	WD repeat containing protein 72 OS Homo sapiens GN WDR72 PE 1 SV 2	Regular	73.5014	36.59	125763	15	7	79	1.91	122655	157077	26172	38.9753	4.9017	Red
14631	Q6ZS11	RINL_HUMAN	Ras and Rab interactor like protein OS Homo sapiens GN RINL PE 2 SV 1	Regular	73.4145	36.56	50224.2	6	5	36	6.86	15798	14917.5	11335	3.7015	0.1859	Red
10316	Q93074	MED12_HUMAN	Mediator of RNA polymerase II transcription subunit 12 OS Homo sapiens GN MED12 PE 1 SV 4	Regular	73.2622	36.7	245819	27	13	144	4.36	47688	12502	48750	3.1021	0.7626	Red
11674	Q86VF7	NRAP_HUMAN	Nebulin related anchoring protein OS Homo sapiens GN NRAP PE 2 SV 2	Regular	73.2408	36.66	198044	56	31	168	4.86	302564	39511	130134	9.8038	1.9416	Red
10601	Q13201	MMRN1_HUMAN	Multimerin 1 OS Homo sapiens GN MMRN1 PE 1 SV 3	Regular	73.0975	36.63	139308	29	15	102	3.5	94038	8569.5	25051	2.1263	0.2962	Red
16261	Q9Y5B9	SP16H_HUMAN	FACT complex subunit SPT16 OS Homo sapiens GN SUPT16H PE 1 SV 1	Regular	73.0712	36.66	120484	24	11	101	5.16	106742	41143	40449	10.2088	1.23	Red
3788	P51589	CP2J2_HUMAN	Cytochrome P450 2J2 OS Homo sapiens GN CYP2J2 PE 1 SV 2	Regular	73.0623	36.62	57895.9	4	2	55	4.78	3332	4998	5007	1.2401	0.0718	Red
15859	Q92835	SHIP1_HUMAN	Phosphatidylinositol 3 4 5 trisphosphate 5 phosphatase 1 OS Homo sapiens GN INPP5D PE 1 SV 2	Regular	73.0437	36.59	134205	13	9	100	4.79	75457	58288	12029	14.4629	1.941	Red
16282	Q07617	SPAG1_HUMAN	Sperm associated antigen 1 OS Homo sapiens GN SPAG1 PE 1 SV 3	Regular	72.852	36.67	104779	15	9	98	2.7	154574	4809	13289	1.1933	0.125	Red
16438	P11277	SPTB1_HUMAN	Spectrin beta chain erythrocytic OS Homo sapiens GN SPTB PE 1 SV 5	Regular	72.8196	36.64	247324	29	16	217	6.69	55297	12770	33859	3.1686	0.7837	Red	16445 16439 16446
7105	Q08378	GOGA3_HUMAN	Golgin subfamily A member 3 OS Homo sapiens GN GOLGA3 PE 1 SV 2	Regular	72.7856	36.61	167868	30	17	146	5.07	73341	16598	43161	4.1184	0.6914	Red	36711
5244	A4FU69	EFCB5_HUMAN	EF hand calcium binding domain containing protein 5 OS Homo sapiens GN EFCAB5 PE 1 SV 2	Regular	72.6213	36.68	174388	32	14	142	4.86	99593	51406	45565	12.7553	2.2244	Red
12642	Q13219	PAPP1_HUMAN	Pappalysin 1 OS Homo sapiens GN PAPPA PE 1 SV 3	Regular	72.6018	36.65	185763	16	8	99	4.73	56628	40412	41366	10.0274	1.8627	Red
5969	Q9ULQ0	FA40B_HUMAN	Protein FAM40B OS Homo sapiens GN FAM40B PE 2 SV 2	Regular	72.4797	36.62	96329.2	7	5	56	6.59	45166	41695	12891	10.3457	0.9966	Red
10925	Q9NR99	MXRA5_HUMAN	Matrix remodeling associated protein 5 OS Homo sapiens GN MXRA5 PE 2 SV 3	Regular	72.3839	36.59	314261	56	29	205	4.46	187373	75277	78418	18.6784	5.8699	Red
19943	Q5T7W0	ZN618_HUMAN	Zinc finger protein 618 OS Homo sapiens GN ZNF618 PE 1 SV 1	Regular	72.2671	36.61	106666	21	9	74	1.47	46238	16278	29505	4.039	0.4308	Red
3668	P53621	COPA_HUMAN	Coatomer subunit alpha OS Homo sapiens GN COPA PE 1 SV 2	Regular	71.8539	36.74	139886	18	9	101	4.33	70731	19094	22352	4.7378	0.6627	Red
10987	O43795	MYO1B_HUMAN	Unconventional myosin Ib OS Homo sapiens GN MYO1B PE 2 SV 3	Regular	71.4219	36.82	133012	29	15	86	2.82	178941	3604.5	39895	0.8944	0.119	Red
14249	Q8TDY2	RBCC1_HUMAN	RB1 inducible coiled coil protein 1 OS Homo sapiens GN RB1CC1 PE 1 SV 3	Regular	71.394	36.84	185201	38	17	149	6.27	157371	63708	57722	15.8078	2.9276	Red
16592	Q9Y2H1	ST38L_HUMAN	Serine threonine protein kinase 38 like OS Homo sapiens GN STK38L PE 1 SV 3	Regular	71.3195	36.81	54231.1	8	6	46	11.85	22980	9125	10261	2.2642	0.1228	Red
11026	O60237	MYPT2_HUMAN	Protein phosphatase 1 regulatory subunit 12B OS Homo sapiens GN PPP1R12B PE 1 SV 2	Regular	71.2222	36.78	110860	19	11	91	6.82	49065	18066	26009	4.4827	0.497	Red
10263	Q7L590	MCM10_HUMAN	Protein MCM10 homolog OS Homo sapiens GN MCM10 PE 1 SV 2	Regular	71.0863	36.8	99323.7	14	10	77	4.91	70670	21100	29988	5.2355	0.52	Red	7448
5847	Q6ZU69	F205A_HUMAN	Protein FAM205A OS Homo sapiens GN FAM205A PE 2 SV 4	Regular	71.0768	36.77	149807	18	5	84	2.1	61859	31180.5	20326	7.7368	1.159	Red
8991	Q96Q89	KI20B_HUMAN	Kinesin like protein KIF20B OS Homo sapiens GN KIF20B PE 1 SV 3	Regular	70.9232	36.85	211998	26	20	197	6.7	88145	23263	31130	5.7722	1.2237	Red
10960	Q9UKX2	MYH2_HUMAN	Myosin 2 OS Homo sapiens GN MYH2 PE 1 SV 1	Regular	70.4899	37.03	224071	26	14	162	4.17	95449	38363.6	53124	9.5191	2.133	Red	10962 10961 10966 10955 10956 10957 10954 10967
4581	Q92841	DDX17_HUMAN	Probable ATP dependent RNA helicase DDX17 OS Homo sapiens GN DDX17 PE 1 SV 2	Regular	70.4824	37	80956.9	17	10	67	1.1	51218	3357	19266	0.833	0.0674	Red	4610
10942	P04198	MYCN_HUMAN	N myc proto oncogene protein OS Homo sapiens GN MYCN PE 1 SV 2	Regular	70.4793	36.97	49960.6	11	6	32	1.51	51413	36360	15737	9.022	0.4507	Red
4441	Q9P219	DAPLE_HUMAN	Protein Daple OS Homo sapiens GN CCDC88C PE 1 SV 3	Regular	70.4758	36.93	229371	45	22	204	4.93	282171	61542.9	107499	15.2706	3.5026	Red	15471
7409	P78347	GTF2I_HUMAN	General transcription factor II I OS Homo sapiens GN GTF2I PE 1 SV 2	Regular	70.4038	36.96	112930	15	10	84	6.71	55800	15592	17770	3.8688	0.4369	Red	15171
11626	Q8WTW4	NPRL2_HUMAN	Nitrogen permease regulator 2 like protein OS Homo sapiens GN NPRL2 PE 1 SV 2	Regular	70.1355	36.98	44456.9	5	4	35	6.05	44585	23008.5	23013	5.7091	0.2538	Red
8978	Q4VXA5	KHDC1_HUMAN	KH homology domain containing protein 1 OS Homo sapiens GN KHDC1 PE 2 SV 1	Regular	70.0986	36.95	27502.5	7	4	12	18.14	15857	9993	6225	2.4795	0.0682	Red
8801	Q8WYB5	KAT6B_HUMAN	Histone acetyltransferase KAT6B OS Homo sapiens GN KAT6B PE 1 SV 3	Regular	69.911	36.97	234287	33	15	139	3.76	285001	163217	133307	40.4988	9.4883	Red
3013	Q9P2D1	CHD7_HUMAN	Chromodomain helicase DNA binding protein 7 OS Homo sapiens GN CHD7 PE 1 SV 3	Regular	69.8762	36.94	337753	36	18	215	2.77	110296	19479	60514	4.8333	1.6325	Red	3015 3012 3014
9861	Q6UWE0	LRSM1_HUMAN	E3 ubiquitin protein ligase LRSAM1 OS Homo sapiens GN LRSAM1 PE 1 SV 1	Regular	69.8599	36.91	84620.5	8	4	70	3.73	9112	9259.5	4386	2.2975	0.1944	Red
12480	O95747	OXSR1_HUMAN	Serine threonine protein kinase OSR1 OS Homo sapiens GN OXSR1 PE 1 SV 1	Regular	69.493	37.29	58307.4	6	6	44	3.8	19703	11460	7782	2.8436	0.1658	Red
10958	Q9Y2K3	MYH15_HUMAN	Myosin 15 OS Homo sapiens GN MYH15 PE 1 SV 5	Regular	69.4073	37.31	226045	29	16	170	3.08	214745	137270	63681	34.0606	7.6992	Red
4592	O00571	DDX3X_HUMAN	ATP dependent RNA helicase DDX3X OS Homo sapiens GN DDX3X PE 1 SV 3	Regular	69.3198	37.44	73642.7	19	6	65	4.68	24738	18230	15501	4.5234	0.3331	Red
16605	Q9NY15	STAB1_HUMAN	Stabilin 1 OS Homo sapiens GN STAB1 PE 1 SV 3	Regular	69.0809	37.51	287116	13	7	153	1.75	47122	38997	13551	9.6763	2.7782	Yellow
15874	Q13796	SHRM2_HUMAN	Protein Shroom2 OS Homo sapiens GN SHROOM2 PE 1 SV 1	Regular	69.028	37.48	177608	27	10	137	2.6	124760	34213	27577	8.4892	1.5078	Red	15875
17113	Q15814	TBCC_HUMAN	Tubulin specific chaperone C OS Homo sapiens GN TBCC PE 1 SV 2	Regular	68.8938	37.55	39761.4	7	4	36	8.38	15997	9427.5	8382	2.3392	0.093	Red
7608	Q7Z4Q2	HEAT3_HUMAN	HEAT repeat containing protein 3 OS Homo sapiens GN HEATR3 PE 1 SV 2	Regular	68.7101	37.57	75837.5	14	5	54	3.24	53567	67812	5999	16.8261	1.276	Red
11105	Q8WY41	NANO1_HUMAN	Nanos homolog 1 OS Homo sapiens GN NANOS1 PE 1 SV 2	Regular	68.6176	37.64	30857.5	13	4	22	11.64	24043	15112.5	14663	3.7498	0.1157	Red
466	P40145	ADCY8_HUMAN	Adenylate cyclase type 8 OS Homo sapiens GN ADCY8 PE 1 SV 1	Regular	68.5167	37.61	141434	18	9	91	2.24	78900	14041	26525	3.484	0.4928	Red
10995	Q8WXR4	MYO3B_HUMAN	Myosin IIIb OS Homo sapiens GN MYO3B PE 2 SV 4	Regular	68.3816	37.63	153255	35	15	93	3.8	84419	25996	45733	6.4503	0.9885	Red
1523	Q99728	BARD1_HUMAN	BRCA1 associated RING domain protein 1 OS Homo sapiens GN BARD1 PE 1 SV 2	Regular	68.3275	37.6	88130.6	7	4	64	2.19	13578	10773	5435	2.6731	0.2356	Red
13847	P11465	PSG2_HUMAN	Pregnancy specific beta 1 glycoprotein 2 OS Homo sapiens GN PSG2 PE 2 SV 2	Regular	68.2893	37.57	37501.2	4	2	29	7.76	6285	4843.5	2015	1.2018	0.0451	Red
18131	Q9BX84	TRPM6_HUMAN	Transient receptor potential cation channel subfamily M member 6 OS Homo sapiens GN TRPM6 PE 1 SV 2	Regular	68.0982	37.59	233875	34	18	143	2.42	102376	16131	41158	4.0026	0.9361	Red
19651	Q8IYN0	ZN100_HUMAN	Zinc finger protein 100 OS Homo sapiens GN ZNF100 PE 2 SV 2	Regular	68.0828	37.61	64626.6	16	6	46	5.54	39340	17111	20852	4.2457	0.2744	Red	19655 19809
2762	O60308	CE104_HUMAN	Centrosomal protein of 104 kDa OS Homo sapiens GN CEP104 PE 1 SV 1	Regular	68.0074	37.63	105588	21	10	83	6.59	35306	6326	25001	1.5697	0.1657	Red
1376	P46100	ATRX_HUMAN	Transcriptional regulator ATRX OS Homo sapiens GN ATRX PE 1 SV 5	Regular	67.8139	37.9	285038	31	18	217	3.29	178921	12807	33198	3.1778	0.9058	Red
8699	Q9BY89	K1671_HUMAN	Uncharacterized protein KIAA1671 OS Homo sapiens GN KIAA1671 PE 1 SV 2	Regular	67.7742	37.87	197738	41	21	165	3.38	212942	27714	66747	6.8766	1.3598	Yellow
12086	O75665	OFD1_HUMAN	Oral facial digital syndrome 1 protein OS Homo sapiens GN OFD1 PE 1 SV 1	Regular	67.7193	37.84	117128	24	13	99	1.28	111331	38098.5	41327	9.4533	1.1072	Red
16054	Q8NDV3	SMC1B_HUMAN	Structural maintenance of chromosomes protein 1B OS Homo sapiens GN SMC1B PE 1 SV 2	Regular	67.6552	37.81	145163	24	14	120	5.34	88330	29945	47186	7.4302	1.0786	Red
10982	Q9HD67	MYO10_HUMAN	Unconventional myosin X OS Homo sapiens GN MYO10 PE 1 SV 3	Regular	67.6463	37.78	239343	41	19	173	3.6	132148	25109	39358	6.2303	1.4912	Red
1261	P50993	AT1A2_HUMAN	Sodium potassium transporting ATPase subunit alpha 2 OS Homo sapiens GN ATP1A2 PE 1 SV 1	Regular	67.5892	37.75	113577	7	5	76	4.02	50415	7976.42	8187	1.9792	0.2248	Red	1260 1262
7448	Q7Z2Y8	GVIN1_HUMAN	Interferon induced very large GTPase 1 OS Homo sapiens GN GVINP1 PE 2 SV 2	Regular	67.4707	37.82	282128	33	20	194	2.35	130923	25253	66992	6.266	1.7678	Red	10263
6946	Q9Y2X7	GIT1_HUMAN	ARF GTPase activating protein GIT1 OS Homo sapiens GN GIT1 PE 1 SV 2	Regular	67.2207	37.94	85082.4	14	7	58	5.91	72024	49590	12874	12.3047	1.0469	Red
2127	Q9BXL7	CAR11_HUMAN	Caspase recruitment domain containing protein 11 OS Homo sapiens GN CARD11 PE 1 SV 3	Regular	67.1265	37.96	134596	12	6	111	5.55	29034	19332	12249	4.7968	0.6456	Red
17817	Q9H2K2	TNKS2_HUMAN	Tankyrase 2 OS Homo sapiens GN TNKS2 PE 1 SV 1	Regular	66.8929	38.12	128572	21	11	104	5.57	56267	15549	42491	3.8582	0.496	Red	17816
18090	Q8N9V2	TRIML_HUMAN	Probable E3 ubiquitin protein ligase TRIML1 OS Homo sapiens GN TRIML1 PE 1 SV 1	Regular	66.7542	38.19	53857.4	6	3	33	4.27	8678	9304.5	5223	2.3087	0.1243	Red
11704	Q9P2S2	NRX2A_HUMAN	Neurexin 2 alpha OS Homo sapiens GN NRXN2 PE 2 SV 1	Regular	66.6609	38.21	187092	36	13	113	4.09	95585	34418	74179	8.5401	1.5978	Red
19093	A4UGR9	XIRP2_HUMAN	Xin actin binding repeat containing protein 2 OS Homo sapiens GN XIRP2 PE 1 SV 2	Regular	66.6453	38.18	384125	65	28	302	4.24	150604	22731	87280	5.6402	2.1665	Yellow
834	O75179	ANR17_HUMAN	Ankyrin repeat domain containing protein 17 OS Homo sapiens GN ANKRD17 PE 1 SV 3	Regular	66.632	38.15	276140	26	12	141	2.88	149089	15476	37588	3.84	1.0604	Red
1803	Q06187	BTK_HUMAN	Tyrosine protein kinase BTK OS Homo sapiens GN BTK PE 1 SV 3	Regular	66.4711	38.21	76965.7	5	4	62	7.13	17056	16167	10988	4.0115	0.3087	Red
7911	Q86XA9	HTR5A_HUMAN	HEAT repeat containing protein 5A OS Homo sapiens GN HEATR5A PE 1 SV 2	Regular	66.4618	38.18	225312	21	12	148	2.65	155279	9952	57893	2.4694	0.5564	Red
11710	Q96L73	NSD1_HUMAN	Histone lysine N methyltransferase H3 lysine 36 and H4 lysine 20 specific OS Homo sapiens GN NSD1 P	Regular	66.4566	38.15	302298	35	20	203	3.3	135972	49545	48371	12.2935	3.7163	Red
4909	Q8NF50	DOCK8_HUMAN	Dedicator of cytokinesis protein 8 OS Homo sapiens GN DOCK8 PE 1 SV 3	Regular	66.3896	38.13	241039	14	8	156	3.72	18667	8579	23927	2.1287	0.5131	Red
19670	Q9UQR1	ZN148_HUMAN	Zinc finger protein 148 OS Homo sapiens GN ZNF148 PE 1 SV 2	Regular	66.1972	38.24	89603.6	19	7	49	3.9	46398	10290	30181	2.5532	0.2288	Red
10998	Q9NQX4	MYO5C_HUMAN	Unconventional myosin Vc OS Homo sapiens GN MYO5C PE 1 SV 2	Regular	66.0367	38.35	204122	35	17	147	3.56	85885	19632	38103	4.8713	0.9943	Red	10996
20222	Q96AP4	ZUFSP_HUMAN	Zinc finger with UFM1 specific peptidase domain protein OS Homo sapiens GN ZUFSP PE 1 SV 1	Regular	66.0241	38.32	67213.5	7	3	46	3.63	55924	75879	12705	18.8277	1.2655	Red
16813	Q9P2J5	SYLC_HUMAN	Leucine tRNA ligase cytoplasmic OS Homo sapiens GN LARS PE 1 SV 2	Regular	65.8563	38.39	135664	15	6	97	4.76	23908	17905	11644	4.4427	0.6027	Red
4899	Q5JSL3	DOC11_HUMAN	Dedicator of cytokinesis protein 11 OS Homo sapiens GN DOCK11 PE 1 SV 2	Regular	65.7914	38.46	240294	34	16	172	3.28	113162	12737	49545	3.1604	0.7594	Red	8020 4910
16056	Q9UQE7	SMC3_HUMAN	Structural maintenance of chromosomes protein 3 OS Homo sapiens GN SMC3 PE 1 SV 2	Regular	65.7776	38.47	141941	32	18	125	6.82	133096	22026	48222	5.4653	0.7757	Red
13603	Q9BYK8	PR285_HUMAN	Peroxisomal proliferator activated receptor A interacting complex 285 kDa protein OS Homo sapiens GN	Regular	65.7708	38.44	298472	37	20	197	5.4	187293	29784	36900	7.3903	2.2058	Red
15806	Q562F6	SGOL2_HUMAN	Shugoshin like 2 OS Homo sapiens GN SGOL2 PE 1 SV 2	Regular	65.6477	38.7	145880	26	11	138	2.06	66221	24428	28154	6.0613	0.8842	Red
17266	Q9UQP3	TENN_HUMAN	Tenascin N OS Homo sapiens GN TNN PE 1 SV 2	Regular	65.4669	38.81	145859	18	14	106	9.7	59233	16214	54291	4.0232	0.5868	Red
12733	Q6V1P9	PCD23_HUMAN	Protocadherin 23 OS Homo sapiens GN DCHS2 PE 2 SV 1	Regular	65.2565	38.92	323945	47	20	192	3.12	145940	47233	69037	11.7199	3.7966	Red
17288	Q9NXF1	TEX10_HUMAN	Testis expressed sequence 10 protein OS Homo sapiens GN TEX10 PE 1 SV 2	Regular	65.1803	38.94	106416	12	6	75	5.27	17424	12458	14288	3.0912	0.329	Red
15194	Q13621	S12A1_HUMAN	Solute carrier family 12 member 1 OS Homo sapiens GN SLC12A1 PE 1 SV 2	Regular	65.1462	39	122705	5	3	69	3.18	25245	25245	10258	6.264	0.7686	Red
11773	Q92621	NU205_HUMAN	Nuclear pore complex protein Nup205 OS Homo sapiens GN NUP205 PE 1 SV 3	Regular	65.0566	39.06	230317	19	8	143	2.39	42761	15581	25677	3.8661	0.8904	Red
7242	Q9BZJ8	GPR61_HUMAN	Probable G protein coupled receptor 61 OS Homo sapiens GN GPR61 PE 2 SV 2	Regular	64.9016	39.17	49919.8	7	3	19	7.1	25402	35163	4935	8.7249	0.4355	Red
6087	Q9NYY8	FAKD2_HUMAN	FAST kinase domain containing protein 2 OS Homo sapiens GN FASTKD2 PE 1 SV 1	Regular	64.6597	39.23	82432.5	14	9	60	8.17	51253	33190	24775	8.2354	0.6789	Red
11431	Q8N4C6	NIN_HUMAN	Ninein OS Homo sapiens GN NIN PE 1 SV 4	Regular	64.541	39.29	245359	30	20	187	3.44	96064	19740	36641	4.8981	1.2018	Red
8961	P29375	KDM5A_HUMAN	Lysine specific demethylase 5A OS Homo sapiens GN KDM5A PE 1 SV 3	Regular	64.465	39.36	194947	29	14	171	3.2	224403	138418	25709	34.3455	6.6955	Red
3595	A6NMZ7	CO6A6_HUMAN	Collagen alpha 6 VI chain OS Homo sapiens GN COL6A6 PE 1 SV 2	Regular	64.2871	39.37	248828	33	16	179	4.64	113043	38867	47591	9.644	2.3997	Red
14017	P06737	PYGL_HUMAN	Glycogen phosphorylase liver form OS Homo sapiens GN PYGL PE 1 SV 4	Regular	64.2315	39.34	97548	21	7	76	2.6	45564	20472.9	25909	5.0799	0.4955	Red	14018
831	Q6UB99	ANR11_HUMAN	Ankyrin repeat domain containing protein 11 OS Homo sapiens GN ANKRD11 PE 1 SV 3	Regular	64.1926	39.36	299796	41	26	225	5.07	137639	27076	89254	6.7183	2.0141	Red
9407	P24043	LAMA2_HUMAN	Laminin subunit alpha 2 OS Homo sapiens GN LAMA2 PE 1 SV 4	Regular	64.1902	39.33	353201	50	21	243	1.35	569840	35201	61938	8.7344	3.085	Red
3645	Q96P44	COLA1_HUMAN	Collagen alpha 1 XXI chain OS Homo sapiens GN COL21A1 PE 2 SV 1	Regular	64.0803	39.34	100167	17	9	64	4.7	52101	17679	28416	4.3867	0.4394	Red	2399
1082	Q14865	ARI5B_HUMAN	AT rich interactive domain containing protein 5B OS Homo sapiens GN ARID5B PE 1 SV 3	Regular	63.7863	39.41	133515	11	4	113	2.19	45307	30120	56664	7.4736	0.9978	Red
2770	O15078	CE290_HUMAN	Centrosomal protein of 290 kDa OS Homo sapiens GN CEP290 PE 1 SV 2	Regular	63.6329	39.6	291071	44	27	293	3.27	192593	45705	58621	11.3407	3.3009	Red
8962	Q9UGL1	KDM5B_HUMAN	Lysine specific demethylase 5B OS Homo sapiens GN KDM5B PE 1 SV 3	Regular	63.604	39.57	178794	23	14	124	5.83	124429	16306	26410	4.046	0.7234	Red
14235	Q15042	RB3GP_HUMAN	Rab3 GTPase activating protein catalytic subunit OS Homo sapiens GN RAB3GAP1 PE 1 SV 3	Regular	63.4851	39.72	111664	12	8	79	3.16	40848	12396	13428	3.0758	0.3435	Red
17286	O43151	TET3_HUMAN	Methylcytosine dioxygenase TET3 OS Homo sapiens GN TET3 PE 2 SV 3	Regular	63.4569	39.69	181118	19	9	117	2.11	48654	18783	16313	4.6606	0.8441	Red
2375	Q6TFL3	CC171_HUMAN	Coiled coil domain containing protein 171 OS Homo sapiens GN CCDC171 PE 2 SV 1	Regular	63.162	39.93	154179	20	12	148	3.47	39329	8680	22630	2.1538	0.3321	Red
17437	Q7Z2Z1	TICRR_HUMAN	Treslin OS Homo sapiens GN TICRR PE 1 SV 2	Regular	63.1504	39.9	212853	20	14	135	3.77	85939	21011	21165	5.2134	1.1097	Red
592	O00170	AIP_HUMAN	AH receptor interacting protein OS Homo sapiens GN AIP PE 1 SV 2	Regular	63.116	39.87	38092.3	8	2	30	6.97	20256	29109	8945	7.2228	0.2751	Red
17291	Q8IWB6	TEX14_HUMAN	Inactive serine threonine protein kinase TEX14 OS Homo sapiens GN TEX14 PE 1 SV 2	Regular	63.0358	39.84	169213	19	12	123	6.75	46880	30166	16417	7.485	1.2666	Red
8061	P32019	I5P2_HUMAN	Type II inositol 1 4 5 trisphosphate 5 phosphatase OS Homo sapiens GN INPP5B PE 1 SV 4	Regular	62.9926	39.81	114107	20	9	82	3.42	265585	25935.7	30956	6.4354	0.7343	Red	12061
10750	O15440	MRP5_HUMAN	Multidrug resistance associated protein 5 OS Homo sapiens GN ABCC5 PE 1 SV 2	Regular	62.9737	39.82	161744	23	10	97	5.15	70546	23735.5	28057	5.8894	0.9526	Red	10753
16828	O15061	SYNEM_HUMAN	Synemin OS Homo sapiens GN SYNM PE 1 SV 2	Regular	62.9453	39.8	173110	22	12	164	1.47	90117	3477	23187	0.8627	0.1493	Red
523	P55196	AFAD_HUMAN	Afadin OS Homo sapiens GN MLLT4 PE 1 SV 3	Regular	62.9308	39.81	207831	31	15	147	1.32	141241	17048	44011	4.2301	0.8791	Red
19655	Q03924	ZN117_HUMAN	Zinc finger protein 117 OS Homo sapiens GN ZNF117 PE 2 SV 5	Regular	62.8884	39.78	58257.6	9	6	34	9.11	43391	7809	13206	1.9376	0.1129	Red	19809 19651
11285	Q9ULJ8	NEB1_HUMAN	Neurabin 1 OS Homo sapiens GN PPP1R9A PE 1 SV 2	Regular	62.8846	39.75	123627	19	9	84	3.28	69140	16835	9558	4.1772	0.5164	Red
10475	O94851	MICA2_HUMAN	Protein methionine sulfoxide oxidase MICAL2 OS Homo sapiens GN MICAL2 PE 1 SV 1	Regular	62.8449	39.77	128172	16	7	94	4.36	66744	9908	56402	2.4585	0.3151	Red	10476 14402 13712
8781	Q14678	KANK1_HUMAN	KN motif and ankyrin repeat domain containing protein 1 OS Homo sapiens GN KANK1 PE 1 SV 3	Regular	62.7951	39.74	149114	9	7	98	5.4	65484	13083	20452	3.2463	0.4841	Red
4626	Q9H4E7	DEFI6_HUMAN	Differentially expressed in FDCP 6 homolog OS Homo sapiens GN DEF6 PE 1 SV 1	Regular	62.7302	39.71	74480.7	13	9	59	3.65	67376	69360	16125	17.2102	1.2818	Red
3243	Q07065	CKAP4_HUMAN	Cytoskeleton associated protein 4 OS Homo sapiens GN CKAP4 PE 1 SV 2	Regular	62.6709	39.73	66136.6	12	8	64	2.82	82962	4647	10497	1.1531	0.0763	Red
15650	Q9BVL4	SELO_HUMAN	Selenoprotein O OS Homo sapiens GN SELO PE 2 SV 3	Regular	62.6599	39.7	74194.8	4	3	38	0.9	21812	24003	5060	5.9558	0.4419	Red
3781	P10632	CP2C8_HUMAN	Cytochrome P450 2C8 OS Homo sapiens GN CYP2C8 PE 1 SV 2	Regular	62.6527	39.67	56623.2	6	5	43	4.9	27053	6425.68	7229	1.5944	0.0903	Red	3784
618	Q99996	AKAP9_HUMAN	A kinase anchor protein 9 OS Homo sapiens GN AKAP9 PE 1 SV 3	Regular	62.5189	39.81	456006	79	45	411	3.43	321132	25189	126043	6.2501	2.8501	Red	2821 12812
10881	Q5JR59	MTUS2_HUMAN	Microtubule associated tumor suppressor candidate 2 OS Homo sapiens GN MTUS2 PE 1 SV 3	Regular	62.4884	39.83	150993	17	10	126	4.24	108858	66361	36528	16.4661	2.4863	Red
4985	Q14194	DPYL1_HUMAN	Dihydropyrimidinase related protein 1 OS Homo sapiens GN CRMP1 PE 1 SV 1	Regular	62.3134	39.93	62526.1	12	7	41	7.87	86751	27529.8	16734	6.8309	0.4271	Yellow	4986
2576	P21127	CD11B_HUMAN	Cyclin dependent kinase 11B OS Homo sapiens GN CDK11B PE 1 SV 3	Regular	62.2864	39.9	92878.2	13	5	91	3.77	25562	12138	19956	3.0118	0.2797	Red
9717	O94910	LPHN1_HUMAN	Latrophilin 1 OS Homo sapiens GN LPHN1 PE 1 SV 1	Regular	62.1345	40.09	164713	16	5	98	4.07	38816	15003	22059	3.7227	0.6132	Red	16022
2595	P20273	CD22_HUMAN	B cell receptor CD22 OS Homo sapiens GN CD22 PE 1 SV 2	Regular	62.0973	40.06	96659.4	23	10	54	6.14	61215	24756	21239	6.1427	0.5937	Red
17261	Q9NT68	TEN2_HUMAN	Teneurin 2 OS Homo sapiens GN ODZ2 PE 1 SV 3	Regular	62.0954	40.03	312236	21	13	170	2.7	145924	10349	52582	2.5679	0.8018	Red	17262
6508	Q14CM0	FRPD4_HUMAN	FERM and PDZ domain containing protein 4 OS Homo sapiens GN FRMPD4 PE 1 SV 1	Regular	62.067	40	145577	18	8	106	4.84	31962	11457	34365	2.8428	0.4138	Red
12655	Q460N5	PAR14_HUMAN	Poly ADP ribose polymerase 14 OS Homo sapiens GN PARP14 PE 1 SV 3	Regular	62.0525	39.97	204853	49	24	168	5.27	233098	84433	42706	20.9502	4.2917	Red	37228 413
17507	Q9Y4G6	TLN2_HUMAN	Talin 2 OS Homo sapiens GN TLN2 PE 1 SV 4	Regular	61.9479	39.99	273952	50	21	201	3.11	610571	160376	49471	39.7939	10.9016	Red	17506
2820	Q02224	CENPE_HUMAN	Centromere associated protein E OS Homo sapiens GN CENPE PE 1 SV 2	Regular	61.4367	40.3	317784	61	30	342	5.37	231133	62088	80274	15.4058	4.8957	Red
6120	Q9NYQ8	FAT2_HUMAN	Protocadherin Fat 2 OS Homo sapiens GN FAT2 PE 1 SV 2	Regular	61.3341	40.31	482397	46	21	276	3.08	138924	37731	42797	9.3621	4.5163	Red
15421	Q9NZJ4	SACS_HUMAN	Sacsin OS Homo sapiens GN SACS PE 1 SV 2	Regular	61.3054	40.28	526830	79	38	378	3.82	205239	32473	140833	8.0575	4.2449	Red
15831	Q9P0V3	SH3B4_HUMAN	SH3 domain binding protein 4 OS Homo sapiens GN SH3BP4 PE 1 SV 1	Regular	61.2555	40.25	108465	16	7	75	3.74	34448	17657	20430	4.3812	0.4752	Red
15351	Q9HBR0	S38AA_HUMAN	Putative sodium coupled neutral amino acid transporter 10 OS Homo sapiens GN SLC38A10 PE 1 SV 2	Regular	61.1614	40.31	120447	7	6	99	4.65	9654	6395	5778	1.5868	0.1911	Red
14617	O95153	RIMB1_HUMAN	Peripheral type benzodiazepine receptor associated protein 1 OS Homo sapiens GN BZRAP1 PE 1 SV 2	Regular	61.0408	40.45	202389	17	12	135	4.85	84644	37262	27596	9.2458	1.8712	Red
12042	Q15646	OASL_HUMAN	2 5 oligoadenylate synthase like protein OS Homo sapiens GN OASL PE 1 SV 2	Regular	60.9962	40.42	59739.3	12	6	44	3.11	78210	4701	19391	1.1665	0.0697	Red
17946	Q4KMQ1	TPRN_HUMAN	Taperin OS Homo sapiens GN TPRN PE 2 SV 2	Regular	60.9313	40.43	75841	6	5	50	5.2	24845	6626	7141	1.6441	0.1247	Red
4612	Q5H9U9	DDX6L_HUMAN	Probable ATP dependent RNA helicase DDX60 like OS Homo sapiens GN DDX60L PE 2 SV 2	Regular	60.8811	40.49	199955	24	12	135	2.58	136343	79955	36156	19.8391	3.9669	Red
4239	O60494	CUBN_HUMAN	Cubilin OS Homo sapiens GN CUBN PE 1 SV 5	Regular	60.7969	40.5	407519	36	18	178	3.2	79433	37325	45220	9.2614	3.7742	Red	21025 25080 35054 34037 5656
8020	Q4G0P3	HYDIN_HUMAN	Hydrocephalus inducing protein homolog OS Homo sapiens GN HYDIN PE 1 SV 3	Regular	60.7049	40.56	581311	53	25	346	2.05	288818	52583.1	72724	13.0474	7.5846	Red	4910 4899
18549	Q5T4S7	UBR4_HUMAN	E3 ubiquitin protein ligase UBR4 OS Homo sapiens GN UBR4 PE 1 SV 1	Regular	60.62	40.57	580913	43	21	368	1.91	259819	80606	48652	20.0006	11.6186	Red
8659	Q9BVV6	K0586_HUMAN	Uncharacterized protein KIAA0586 OS Homo sapiens GN KIAA0586 PE 1 SV 4	Regular	60.5982	40.54	170276	21	10	114	4.63	39321	7971	14987	1.9778	0.3368	Red
3458	Q63HM2	CN135_HUMAN	Pecanex like protein C14orf135 OS Homo sapiens GN C14orf135 PE 2 SV 4	Regular	60.5883	40.51	133843	21	10	69	2.99	57621	18302	17766	4.5412	0.6078	Red
10023	Q9Y6R4	M3K4_HUMAN	Mitogen activated protein kinase kinase kinase 4 OS Homo sapiens GN MAP3K4 PE 1 SV 2	Regular	60.5245	40.53	183396	36	16	130	2.92	191931	40048	48504	9.9371	1.8224	Red	10929
16471	Q8N5C6	SRBD1_HUMAN	S1 RNA binding domain containing protein 1 OS Homo sapiens GN SRBD1 PE 1 SV 2	Regular	60.4591	40.5	113030	10	9	92	6.23	58025	42342	14371	10.5063	1.1875	Red
703	P19021	AMD_HUMAN	Peptidyl glycine alpha amidating monooxygenase OS Homo sapiens GN PAM PE 1 SV 2	Regular	60.205	40.55	109188	6	4	75	5.65	32201	24640	12898	6.1139	0.6676	Red
5622	O60447	EVI5_HUMAN	Ecotropic viral integration site 5 protein homolog OS Homo sapiens GN EVI5 PE 1 SV 3	Regular	60.2025	40.52	93519.3	12	9	72	6.17	63937	13362	13045	3.3155	0.3101	Red
219	Q8IZY2	ABCA7_HUMAN	ATP binding cassette sub family A member 7 OS Homo sapiens GN ABCA7 PE 1 SV 3	Regular	60.1862	40.5	236403	34	14	137	1.07	153367	18295.5	53580	4.5396	1.0732	Red
11556	Q9Y2X3	NOP58_HUMAN	Nucleolar protein 58 OS Homo sapiens GN NOP58 PE 1 SV 1	Regular	60.0499	40.59	60091.5	16	9	38	7.94	149358	12043	39447	2.9882	0.1796	Red
10729	Q5VT25	MRCKA_HUMAN	Serine threonine protein kinase MRCK alpha OS Homo sapiens GN CDC42BPA PE 1 SV 1	Regular	60.0295	40.56	199474	39	19	159	3	107482	32282	46707	8.0101	1.5978	Red
20133	P17038	ZNF43_HUMAN	Zinc finger protein 43 OS Homo sapiens GN ZNF43 PE 2 SV 4	Regular	60.0217	40.53	97261.1	16	5	54	1.48	18006	18216	9066	4.5199	0.4396	Red	20014
5966	Q86V20	FA35A_HUMAN	Protein FAM35A OS Homo sapiens GN FAM35A PE 1 SV 1	Regular	59.9284	40.55	94902.8	10	6	52	1.2	31612	26175	13287	6.4948	0.6164	Red
16492	Q7Z6B7	SRGP1_HUMAN	SLIT ROBO Rho GTPase activating protein 1 OS Homo sapiens GN SRGAP1 PE 1 SV 1	Regular	59.8494	40.52	125177	23	12	85	6.64	119640	6642	40093	1.6481	0.2063	Red
18936	Q6ZS81	WDFY4_HUMAN	WD repeat and FYVE domain containing protein 4 OS Homo sapiens GN WDFY4 PE 1 SV 3	Regular	59.8429	40.49	358116	47	22	218	2.51	124011	27257	41392	6.7632	2.422	Red
843	Q8N7Z5	ANR31_HUMAN	Ankyrin repeat domain containing protein 31 OS Homo sapiens GN ANKRD31 PE 5 SV 2	Regular	59.7612	40.51	212926	20	12	176	5.34	48040	23646	17528	5.8672	1.2493	Red
5898	Q5RGS2	F75A2_HUMAN	Protein FAM75A2 OS Homo sapiens GN FAM75A2 PE 3 SV 1	Regular	59.657	40.56	150311	21	9	89	2.75	41324	20196	22870	5.0112	0.7532	Red
16435	Q7KZ85	SPT6H_HUMAN	Transcription elongation factor SPT6 OS Homo sapiens GN SUPT6H PE 1 SV 2	Regular	59.5027	40.57	200328	22	13	141	3.24	102108	21068	41161	5.2276	1.0472	Red
10929	Q92614	MY18A_HUMAN	Unconventional myosin XVIIIa OS Homo sapiens GN MYO18A PE 1 SV 3	Regular	59.4546	40.58	234313	49	23	173	5.4	175505	12500	68611	3.1016	0.7267	Red	5669 28927 4503 10023 5310 19578 14158 31433 38376 2766 33460
18092	O75962	TRIO_HUMAN	Triple functional domain protein OS Homo sapiens GN TRIO PE 1 SV 2	Regular	59.4468	40.56	349980	37	17	249	2.49	773951	16807	43458	4.1703	1.4595	Red	8780
11002	B2RTY4	MYO9A_HUMAN	Unconventional myosin IXa OS Homo sapiens GN MYO9A PE 1 SV 2	Regular	59.2608	40.65	295101	47	24	235	4.67	183609	105137	60069	26.0875	7.6984	Red
5485	P54756	EPHA5_HUMAN	Ephrin type A receptor 5 OS Homo sapiens GN EPHA5 PE 1 SV 3	Regular	59.1529	40.66	116799	13	7	80	2.6	48934	34570.5	17611	8.5779	1.0019	Red	5492 5488 5491
11818	Q14980	NUMA1_HUMAN	Nuclear mitotic apparatus protein 1 OS Homo sapiens GN NUMA1 PE 1 SV 2	Regular	59.0935	40.64	239343	30	25	209	4.02	186839	29072	55569	7.2136	1.7265	Red
17289	Q8IYF3	TEX11_HUMAN	Testis expressed sequence 11 protein OS Homo sapiens GN TEX11 PE 1 SV 3	Regular	59.0331	40.61	109087	11	5	78	3.4	33463	39169.5	13393	9.7191	1.0602	Red
19092	Q702N8	XIRP1_HUMAN	Xin actin binding repeat containing protein 1 OS Homo sapiens GN XIRP1 PE 1 SV 1	Regular	58.6465	40.7	199759	27	13	153	3.58	94278	58685	24525	14.5614	2.9088	Red
3615	Q53SF7	COBL1_HUMAN	Cordon bleu protein like 1 OS Homo sapiens GN COBLL1 PE 1 SV 2	Regular	58.6258	40.67	132528	15	10	110	4.57	129656	95803	19997	23.7715	3.1504	Yellow
18629	O14795	UN13B_HUMAN	Protein unc 13 homolog B OS Homo sapiens GN UNC13B PE 1 SV 2	Regular	58.5508	40.65	182789	28	12	143	1.89	92566	13052	15931	3.2386	0.592	Red	25731
11025	O14974	MYPT1_HUMAN	Protein phosphatase 1 regulatory subunit 12A OS Homo sapiens GN PPP1R12A PE 1 SV 1	Regular	58.529	40.62	115680	15	10	110	5.44	53959	27474	20664	6.8171	0.7886	Red
15400	Q9H1V8	S6A17_HUMAN	Sodium dependent neutral amino acid transporter SLC6A17 OS Homo sapiens GN SLC6A17 PE 2 SV 3	Regular	58.5153	40.59	81800	8	4	51	4.54	6148	3790.5	3466	0.9405	0.0769	Red
15727	O15047	SET1A_HUMAN	Histone lysine N methyltransferase SETD1A OS Homo sapiens GN SETD1A PE 1 SV 3	Regular	58.3343	40.64	186833	22	11	110	3.34	67516	34870	24238	8.6522	1.6165	Red
11020	Q14324	MYPC2_HUMAN	Myosin binding protein C fast type OS Homo sapiens GN MYBPC2 PE 1 SV 2	Regular	58.3339	40.62	128927	11	8	99	3.59	29805	5883	10641	1.4597	0.1882	Red
9408	Q16787	LAMA3_HUMAN	Laminin subunit alpha 3 OS Homo sapiens GN LAMA3 PE 1 SV 2	Regular	58.2563	40.75	375888	42	21	257	3.09	177886	96848	54586	24.0308	9.0329	Red
2991	P10809	CH60_HUMAN	60 kDa heat shock protein mitochondrial OS Homo sapiens GN HSPD1 PE 1 SV 2	Regular	58.1734	40.8	61225.9	18	10	53	4.19	98316	68734.5	22147	17.055	1.0442	Red	9301
10187	O15021	MAST4_HUMAN	Microtubule associated serine threonine protein kinase 4 OS Homo sapiens GN MAST4 PE 1 SV 3	Regular	58.0598	40.77	286602	49	18	202	2.48	137638	36122	79203	8.9629	2.5688	Red
18269	P53804	TTC3_HUMAN	E3 ubiquitin protein ligase TTC3 OS Homo sapiens GN TTC3 PE 1 SV 2	Regular	57.9037	40.86	233006	24	13	144	2.91	93686	21487	47365	5.3315	1.2423	Red
14026	Q9NRF8	PYRG2_HUMAN	CTP synthase 2 OS Homo sapiens GN CTPS2 PE 1 SV 1	Regular	57.8244	40.99	66362	21	11	41	3.24	50166	4518	30645	1.121	0.0744	Red
14499	Q7Z3J3	RGPD4_HUMAN	RanBP2 like and GRIP domain containing protein 4 OS Homo sapiens GN RGPD4 PE 2 SV 3	Regular	57.7097	40.97	198772	36	17	135	3.19	191914	4483.1	30721	1.1124	0.2211	Red	14498 14501 14496 14304
18935	Q8IZQ1	WDFY3_HUMAN	WD repeat and FYVE domain containing protein 3 OS Homo sapiens GN WDFY3 PE 1 SV 2	Regular	57.7088	40.94	399764	35	22	258	2.92	190578	43203	41555	10.7199	4.2854	Red
17440	Q02763	TIE2_HUMAN	Angiopoietin 1 receptor OS Homo sapiens GN TEK PE 1 SV 2	Regular	57.227	41.15	127997	15	9	76	6.05	100734	44244	46370	10.9782	1.4052	Red
3122	Q9P1Z9	CI174_HUMAN	Uncharacterized protein C9orf174 OS Homo sapiens GN C9orf174 PE 1 SV 2	Regular	57.0199	41.39	192526	24	10	155	2.79	117839	53373	30726	13.2434	2.5497	Red
5190	P40939	ECHA_HUMAN	Trifunctional enzyme subunit alpha mitochondrial OS Homo sapiens GN HADHA PE 1 SV 2	Regular	56.9945	41.4	83741.2	10	6	55	1.83	41695	18744	14311	4.6509	0.3895	Red
10317	Q9UHV7	MED13_HUMAN	Mediator of RNA polymerase II transcription subunit 13 OS Homo sapiens GN MED13 PE 1 SV 3	Regular	56.9212	41.41	242833	17	12	125	1.79	54713	35640	16024	8.8433	2.1474	Red
12118	O60313	OPA1_HUMAN	Dynamin like 120 kDa protein mitochondrial OS Homo sapiens GN OPA1 PE 1 SV 3	Regular	56.9202	41.38	112201	14	7	87	3.96	137876	11145	27177	2.7654	0.3103	Yellow
12492	A8MW92	P20L1_HUMAN	PHD finger protein 20 like protein 1 OS Homo sapiens GN PHF20L1 PE 1 SV 2	Regular	56.6911	41.43	116322	10	9	88	3.05	62933	32515	12065	8.0679	0.9385	Red	31591
7161	Q5T848	GP158_HUMAN	Probable G protein coupled receptor 158 OS Homo sapiens GN GPR158 PE 1 SV 1	Regular	56.6319	41.41	136972	16	7	109	4.12	61205	35424	11186	8.7897	1.2039	Red
1210	Q9UBL3	ASH2L_HUMAN	Set1 Ash2 histone methyltransferase complex subunit ASH2 OS Homo sapiens GN ASH2L PE 1 SV 1	Regular	56.4987	41.46	69350.3	14	7	52	1.75	46977	9585	13009	2.3783	0.1649	Red
14986	Q8N122	RPTOR_HUMAN	Regulatory associated protein of mTOR OS Homo sapiens GN RPTOR PE 1 SV 1	Regular	56.475	41.43	150749	20	10	85	2.47	145892	125775	49660	31.2084	4.7046	Red
5116	Q9P2D7	DYH1_HUMAN	Dynein heavy chain 1 axonemal OS Homo sapiens GN DNAH1 PE 1 SV 4	Regular	56.4325	41.44	498003	63	29	323	1.25	176515	63542	77405	15.7666	7.8518	Red	5118 5121
6362	Q14315	FLNC_HUMAN	Filamin C OS Homo sapiens GN FLNC PE 1 SV 3	Regular	56.4288	41.41	293589	51	24	193	4.29	233558	30089	84055	7.4659	2.1919	Red	23662 27906 30066 24005
14498	A6NKT7	RGPD3_HUMAN	RanBP2 like and GRIP domain containing protein 3 OS Homo sapiens GN RGPD3 PE 2 SV 2	Regular	56.205	41.58	198856	40	18	139	3.19	196752	5779.4	32138	1.434	0.2852	Red	14501 14499 14496 14304
4906	Q9H7D0	DOCK5_HUMAN	Dedicator of cytokinesis protein 5 OS Homo sapiens GN DOCK5 PE 1 SV 3	Regular	56.1871	41.62	216336	40	19	156	1.71	172413	37181	58086	9.2257	1.9958	Red
13912	Q6ZW05	PTHD4_HUMAN	Patched domain containing protein 4 OS Homo sapiens GN PTCHD4 PE 2 SV 3	Regular	56.1616	41.6	97568.9	15	5	51	4.26	42272	11155.5	37609	2.768	0.2701	Red
12589	Q6TGC4	PADI6_HUMAN	Protein arginine deiminase type 6 OS Homo sapiens GN PADI6 PE 2 SV 2	Regular	56.1283	41.57	78209.2	8	5	49	7.43	137319	124060	34324	30.7828	2.4075	Red
18855	Q9P253	VPS18_HUMAN	Vacuolar protein sorting associated protein 18 homolog OS Homo sapiens GN VPS18 PE 1 SV 2	Regular	56.1244	41.54	111554	18	11	80	3.7	198468	78520	39447	19.4831	2.1734	Red
13557	P50336	PPOX_HUMAN	Protoporphyrinogen oxidase OS Homo sapiens GN PPOX PE 1 SV 1	Regular	56.1112	41.55	51221.6	6	3	32	4.61	8818	11236.5	8146	2.7881	0.1428	Red
4918	Q18PE1	DOK7_HUMAN	Protein Dok 7 OS Homo sapiens GN DOK7 PE 1 SV 1	Regular	56.058	41.57	53838.4	9	3	31	4.96	30474	43996.5	9564	10.9168	0.5877	Red
17879	Q8N9V7	TOPZ1_HUMAN	Testis and ovary specific PAZ domain containing protein 1 OS Homo sapiens GN TOPAZ1 PE 2 SV 3	Regular	56.0394	41.54	193436	17	13	149	4.02	62343	27059	35799	6.7141	1.2988	Red
14491	Q8N1W1	RGNEF_HUMAN	Rho guanine nucleotide exchange factor OS Homo sapiens GN RGNEF PE 1 SV 3	Regular	55.7748	41.66	194001	15	11	129	1.29	132639	4318.5	42002	1.0715	0.2079	Red	1590 8643 24989 39279
4015	Q8NA69	CS045_HUMAN	Uncharacterized protein C19orf45 OS Homo sapiens GN C19orf45 PE 2 SV 2	Regular	55.6895	41.63	58015.5	8	7	40	2.18	35725	30297	15686	7.5175	0.4361	Red
3597	Q02388	CO7A1_HUMAN	Collagen alpha 1 VII chain OS Homo sapiens GN COL7A1 PE 1 SV 2	Regular	55.5954	41.65	296189	27	19	194	3.33	202465	16685	29303	4.14	1.2262	Red
2996	Q96JM3	CHAP1_HUMAN	Chromosome alignment maintaining phosphoprotein 1 OS Homo sapiens GN CHAMP1 PE 1 SV 2	Regular	55.5794	41.62	90068.7	12	8	71	1.72	29754	5997	18729	1.488	0.134	Red
11207	Q9Y618	NCOR2_HUMAN	Nuclear receptor corepressor 2 OS Homo sapiens GN NCOR2 PE 1 SV 2	Regular	55.4864	41.59	275546	33	18	226	3.13	175250	121621	40708	30.1776	8.3153	Red	11206
5286	Q8N3D4	EH1L1_HUMAN	EH domain binding protein 1 like protein 1 OS Homo sapiens GN EHBP1L1 PE 1 SV 2	Regular	55.4713	41.57	162653	28	14	113	2.89	132511	31941	30306	7.9255	1.2891	Red
17872	P11388	TOP2A_HUMAN	DNA topoisomerase 2 alpha OS Homo sapiens GN TOP2A PE 1 SV 3	Regular	55.4334	41.54	175127	42	20	132	3.79	115656	13876.9	50741	3.4433	0.603	Red	17873
17949	P12270	TPR_HUMAN	Nucleoprotein TPR OS Homo sapiens GN TPR PE 1 SV 3	Regular	55.4181	41.51	267692	49	26	200	3.55	268536	40247	99822	9.9864	2.6733	Red
14645	P23921	RIR1_HUMAN	Ribonucleoside diphosphate reductase large subunit OS Homo sapiens GN RRM1 PE 1 SV 1	Regular	55.3726	41.49	90982.8	9	5	66	6.31	45580	7144	23770	1.7726	0.1613	Red
1860	P00736	C1R_HUMAN	Complement C1r subcomponent OS Homo sapiens GN C1R PE 1 SV 2	Regular	55.3296	41.5	81658.4	14	8	46	3.83	45488	12627	19079	3.1331	0.2558	Red
5121	Q8WXX0	DYH7_HUMAN	Dynein heavy chain 7 axonemal OS Homo sapiens GN DNAH7 PE 1 SV 2	Regular	55.256	41.55	464696	48	25	327	2.39	158927	21784	64037	5.4052	2.5118	Red	5118 5116
18859	Q96QK1	VPS35_HUMAN	Vacuolar protein sorting associated protein 35 OS Homo sapiens GN VPS35 PE 1 SV 2	Regular	55.2222	41.63	92505.6	11	7	63	2.76	32110	15586.5	17566	3.8675	0.3578	Red
1768	Q9UPA5	BSN_HUMAN	Protein bassoon OS Homo sapiens GN BSN PE 1 SV 4	Regular	54.8941	41.86	418580	41	26	276	4.28	649289	28579	79472	7.0913	2.9683	Red	14895
18095	Q15643	TRIPB_HUMAN	Thyroid receptor interacting protein 11 OS Homo sapiens GN TRIP11 PE 1 SV 3	Regular	54.8417	41.91	228271	32	20	212	3.39	108209	18035	43649	4.475	1.0215	Red
1511	O60242	BAI3_HUMAN	Brain specific angiogenesis inhibitor 3 OS Homo sapiens GN BAI3 PE 1 SV 2	Regular	54.7825	41.88	174997	19	11	106	2.76	70864	14709	20880	3.6497	0.6387	Red	2666 5113 28254 15441 23044 32636 31365 16071 13566
10922	P20591	MX1_HUMAN	Interferon induced GTP binding protein Mx1 OS Homo sapiens GN MX1 PE 1 SV 4	Regular	54.7678	41.85	75919.6	16	8	52	4.68	65469	34267.5	19720	8.5027	0.6455	Red
4244	Q13618	CUL3_HUMAN	Cullin 3 OS Homo sapiens GN CUL3 PE 1 SV 2	Regular	54.7084	41.83	89500.7	11	9	68	3.78	107146	11712	16018	2.9061	0.2601	Red
15886	O43166	SI1L1_HUMAN	Signal induced proliferation associated 1 like protein 1 OS Homo sapiens GN SIPA1L1 PE 1 SV 4	Regular	54.3437	42.02	201226	25	11	144	4.21	134711	46366	41660	11.5047	2.3151	Red
421	P35368	ADA1B_HUMAN	Alpha 1B adrenergic receptor OS Homo sapiens GN ADRA1B PE 1 SV 3	Regular	54.3325	41.99	57748.6	10	4	33	5	9127	7623	8338	1.8915	0.1092	Red
10476	Q7RTP6	MICA3_HUMAN	Protein methionine sulfoxide oxidase MICAL3 OS Homo sapiens GN MICAL3 PE 1 SV 2	Regular	54.2776	42.04	225436	26	15	173	2.95	92058	19694	33628	4.8866	1.1016	Red	10475
13142	P01833	PIGR_HUMAN	Polymeric immunoglobulin receptor OS Homo sapiens GN PIGR PE 1 SV 4	Regular	54.2374	42.12	84481.2	29	10	62	4.06	52590	6573	26877	1.6309	0.1378	Red
18676	O75445	USH2A_HUMAN	Usherin OS Homo sapiens GN USH2A PE 1 SV 3	Regular	54.0945	42.17	586664	54	26	290	3.36	165665	52405	71714	13.0032	7.6285	Red
14477	Q8NET4	RGAG1_HUMAN	Retrotransposon gag domain containing protein 1 OS Homo sapiens GN RGAG1 PE 1 SV 1	Regular	54.0741	42.14	144965	24	9	67	2.09	85919	45084	29711	11.1866	1.6217	Red
3541	O94779	CNTN5_HUMAN	Contactin 5 OS Homo sapiens GN CNTN5 PE 2 SV 2	Regular	53.9595	42.15	121485	12	8	76	4.18	53166	24779	10180	6.1484	0.7469	Red
11011	Q5VU43	MYOME_HUMAN	Myomegalin OS Homo sapiens GN PDE4DIP PE 2 SV 1	Regular	53.9538	42.12	266506	40	26	217	4.48	143674	38719	51111	9.6073	2.5604	Red	17811
18516	Q70CQ2	UBP34_HUMAN	Ubiquitin carboxyl terminal hydrolase 34 OS Homo sapiens GN USP34 PE 1 SV 2	Regular	53.9536	42.1	409994	43	24	278	3.81	179448	69574	63255	17.2633	7.0778	Red
14135	Q15276	RABE1_HUMAN	Rab GTPase binding effector protein 1 OS Homo sapiens GN RABEP1 PE 1 SV 2	Regular	53.8197	42.14	99689.8	17	10	103	4.87	48485	10087	29898	2.5029	0.2495	Red
9042	Q2M1P5	KIF7_HUMAN	Kinesin like protein KIF7 OS Homo sapiens GN KIF7 PE 1 SV 2	Regular	53.6708	42.22	151500	25	14	137	2.76	66793	13034	34040	3.2341	0.49	Red
16338	Q15772	SPEG_HUMAN	Striated muscle preferentially expressed protein kinase OS Homo sapiens GN SPEG PE 1 SV 4	Regular	53.6673	42.2	357083	41	26	213	3.43	187211	21779	57047	5.404	1.9297	Red
6788	Q8IWJ2	GCC2_HUMAN	GRIP and coiled coil domain containing protein 2 OS Homo sapiens GN GCC2 PE 1 SV 4	Regular	53.6008	42.21	196993	28	16	203	3.03	65627	33430	36079	8.2949	1.634	Red	14501
3826	Q8IZJ3	CPMD8_HUMAN	C3 and PZP like alpha 2 macroglobulin domain containing protein 8 OS Homo sapiens GN CPAMD8 PE 1 SV	Regular	53.5681	42.22	208755	23	11	110	4.35	81751	37436	36302	9.2889	1.9391	Red
8965	O15550	KDM6A_HUMAN	Lysine specific demethylase 6A OS Homo sapiens GN KDM6A PE 1 SV 2	Regular	53.5117	42.26	156059	11	6	86	1.86	40249	12385.5	11560	3.0732	0.4796	Red	18698
4904	Q8IZD9	DOCK3_HUMAN	Dedicator of cytokinesis protein 3 OS Homo sapiens GN DOCK3 PE 1 SV 1	Regular	53.4881	42.24	235157	26	15	161	2.07	372593	299011	86414	74.1932	17.447	Red
3624	Q05707	COEA1_HUMAN	Collagen alpha 1 XIV chain OS Homo sapiens GN COL14A1 PE 1 SV 3	Regular	53.4706	42.21	194599	10	3	106	2.06	131298	131298	21026	32.5788	6.3398	Red
6476	A0AVI2	FR1L5_HUMAN	Fer 1 like protein 5 OS Homo sapiens GN FER1L5 PE 2 SV 2	Regular	53.1968	42.36	244130	20	10	175	2.44	75335	50591	27142	12.5531	3.0646	Red
16057	Q9NTJ3	SMC4_HUMAN	Structural maintenance of chromosomes protein 4 OS Homo sapiens GN SMC4 PE 1 SV 2	Regular	53.1412	42.37	147867	25	17	137	3.18	94965	45294	35808	11.2387	1.6618	Red
14935	P24928	RPB1_HUMAN	DNA directed RNA polymerase II subunit RPB1 OS Homo sapiens GN POLR2A PE 1 SV 2	Regular	53.1151	42.38	218545	34	13	132	3.76	166441	84307	43294	20.919	4.5717	Red
15865	A0MZ66	SHOT1_HUMAN	Shootin 1 OS Homo sapiens GN KIAA1598 PE 1 SV 4	Regular	53.1115	42.35	72153.2	10	7	73	5.86	50839	20894	10915	5.1844	0.3741	Red
6111	Q8IYD8	FANCM_HUMAN	Fanconi anemia group M protein OS Homo sapiens GN FANCM PE 1 SV 2	Regular	53.0194	42.36	234986	14	10	150	3.32	54127	31032	15423	7.6999	1.8094	Red
14982	Q5VT52	RPRD2_HUMAN	Regulation of nuclear pre mRNA domain containing protein 2 OS Homo sapiens GN RPRD2 PE 1 SV 1	Regular	52.9871	42.37	156476	13	7	111	3.49	55629	35006	14096	8.686	1.3591	Red
6321	Q92562	FIG4_HUMAN	Polyphosphoinositide phosphatase OS Homo sapiens GN FIG4 PE 1 SV 1	Regular	52.9475	42.35	104433	15	8	72	5.95	23652	11068	19333	2.7463	0.2868	Red
6463	Q8IVH2	FOXP4_HUMAN	Forkhead box protein P4 OS Homo sapiens GN FOXP4 PE 1 SV 1	Regular	52.8894	42.32	73887.7	4	2	39	4.71	6410	6078	4419	1.5081	0.1114	Red
5125	Q8NCM8	DYHC2_HUMAN	Cytoplasmic dynein 2 heavy chain 1 OS Homo sapiens GN DYNC2H1 PE 1 SV 4	Regular	52.8699	42.3	496101	50	28	346	3.71	486212	29702	147858	7.3699	3.6562	Red
16673	Q9H668	STN1_HUMAN	CST complex subunit STN1 OS Homo sapiens GN OBFC1 PE 1 SV 2	Regular	52.7169	42.44	42461.3	8	3	43	4.89	15989	10419	5195	2.5853	0.1098	Red
19620	O95409	ZIC2_HUMAN	Zinc finger protein ZIC 2 OS Homo sapiens GN ZIC2 PE 1 SV 2	Regular	52.6643	42.45	55633.2	5	3	22	3.57	14549	5748	4266	1.4262	0.0793	Red
7620	Q9P2P5	HECW2_HUMAN	E3 ubiquitin protein ligase HECW2 OS Homo sapiens GN HECW2 PE 1 SV 2	Regular	52.5474	42.5	176739	20	12	93	3.75	105880	8953	16289	2.2215	0.3926	Red
16817	Q92797	SYMPK_HUMAN	Symplekin OS Homo sapiens GN SYMPK PE 1 SV 2	Regular	52.4672	42.51	142004	20	11	113	1.49	68855	13165.5	19212	3.2667	0.4639	Red
3512	A5YKK6	CNOT1_HUMAN	CCR4 NOT transcription complex subunit 1 OS Homo sapiens GN CNOT1 PE 1 SV 2	Regular	52.4164	42.51	269278	29	19	185	2.23	137727	19841	46423	4.9231	1.3257	Red
13190	Q7Z442	PK1L2_HUMAN	Polycystic kidney disease protein 1 like 2 OS Homo sapiens GN PKD1L2 PE 1 SV 4	Regular	52.2728	42.56	275769	30	13	137	3.58	93581	15427	44710	3.8279	1.0556	Red
2199	Q9H6R7	CB044_HUMAN	WD repeat containing protein C2orf44 OS Homo sapiens GN C2orf44 PE 1 SV 1	Regular	52.2025	42.53	80333.2	5	2	50	4.16	10524	15786	2697	3.917	0.3147	Red
18273	Q86TZ1	TTC6_HUMAN	Tetratricopeptide repeat protein 6 OS Homo sapiens GN TTC6 PE 2 SV 1	Regular	52.1943	42.51	60006.4	6	3	41	4.04	35131	14569.5	5736	3.6151	0.2169	Red
16894	A2VDJ0	T131L_HUMAN	Transmembrane protein 131 like OS Homo sapiens GN KIAA0922 PE 1 SV 2	Regular	52.0571	42.52	181963	10	6	115	1.55	43620	27432	21347	6.8067	1.2386	Red
5245	Q5THR3	EFCB6_HUMAN	EF hand calcium binding domain containing protein 6 OS Homo sapiens GN EFCAB6 PE 1 SV 1	Regular	52.0285	42.49	174812	25	13	135	1.93	67615	10206	23320	2.5324	0.4427	Red
10996	Q9Y4I1	MYO5A_HUMAN	Unconventional myosin Va OS Homo sapiens GN MYO5A PE 1 SV 2	Regular	51.9611	42.6	217116	33	20	161	3.45	78482	12644.8	38500	3.1375	0.6812	Red	10997 10998
18143	Q9Y606	TRUA_HUMAN	tRNA pseudouridine synthase A mitochondrial OS Homo sapiens GN PUS1 PE 1 SV 3	Regular	51.9193	42.61	48040.4	14	9	41	8.43	37318	10204	14529	2.5319	0.1216	Red
746	Q6ZTN6	AN13D_HUMAN	Ankyrin repeat domain containing protein 13D OS Homo sapiens GN ANKRD13D PE 1 SV 2	Regular	51.8735	42.62	58761.2	4	2	33	3.67	13236	19854	1625	4.9263	0.2895	Red
216	P78363	ABCA4_HUMAN	Retinal specific ATP binding cassette transporter OS Homo sapiens GN ABCA4 PE 1 SV 3	Regular	51.8687	42.59	258396	27	14	154	2.2	43141	6332	27626	1.5712	0.406	Red
10148	P78559	MAP1A_HUMAN	Microtubule associated protein 1A OS Homo sapiens GN MAP1A PE 1 SV 6	Regular	51.8684	42.57	306968	20	13	232	2.46	398924	47858	47521	11.8749	3.6452	Red
1067	Q86VW2	ARHGP_HUMAN	Rho guanine nucleotide exchange factor 25 OS Homo sapiens GN ARHGEF25 PE 1 SV 2	Regular	51.7968	42.58	64641.1	5	4	38	3.62	17959	13047	5435	3.2373	0.2093	Red
15242	Q4U2R8	S22A6_HUMAN	Solute carrier family 22 member 6 OS Homo sapiens GN SLC22A6 PE 1 SV 1	Regular	51.7806	42.55	62557.8	3	3	29	3.91	33075	42844.5	7357	10.6309	0.665	Red
15566	Q99250	SCN2A_HUMAN	Sodium channel protein type 2 subunit alpha OS Homo sapiens GN SCN2A PE 1 SV 3	Regular	51.6877	42.66	230142	19	9	128	2.19	35307	10802	16290	2.6803	0.6168	Red	15564 15574
786	P16157	ANK1_HUMAN	Ankyrin 1 OS Homo sapiens GN ANK1 PE 1 SV 3	Regular	51.6627	42.64	207463	29	14	142	2.82	97298	11636	30176	2.8872	0.599	Red	788
1537	Q9UIF9	BAZ2A_HUMAN	Bromodomain adjacent to zinc finger domain protein 2A OS Homo sapiens GN BAZ2A PE 1 SV 4	Regular	51.6228	42.65	213137	23	11	107	1.84	63195	4333.5	17600	1.0753	0.2292	Red
3617	Q99715	COCA1_HUMAN	Collagen alpha 1 XII chain OS Homo sapiens GN COL12A1 PE 1 SV 2	Regular	51.5924	42.62	334345	42	20	204	3.92	183499	54028	59236	13.4059	4.4822	Red
4801	P78352	DLG4_HUMAN	Disks large homolog 4 OS Homo sapiens GN DLG4 PE 1 SV 3	Regular	51.5895	42.63	80837.6	9	6	71	3.31	16148	10549	12023	2.6175	0.2116	Red
11488	Q86WI3	NLRC5_HUMAN	Protein NLRC5 OS Homo sapiens GN NLRC5 PE 1 SV 3	Regular	51.5854	42.61	208758	25	14	108	4.61	64760	22602	26214	5.6082	1.1708	Red
17265	Q63HR2	TENC1_HUMAN	Tensin like C1 domain containing phosphatase OS Homo sapiens GN TENC1 PE 1 SV 2	Regular	51.4042	42.65	154462	24	13	108	3.41	132385	20223	26439	5.0179	0.7751	Red	17269 18260 11132
968	P04114	APOB_HUMAN	Apolipoprotein B 100 OS Homo sapiens GN APOB PE 1 SV 2	Regular	51.3684	42.66	516974	80	39	351	2.91	439502	13130	113231	3.2579	1.6843	Red
16033	Q8IY92	SLX4_HUMAN	Structure specific endonuclease subunit SLX4 OS Homo sapiens GN SLX4 PE 1 SV 3	Regular	51.3471	42.7	201837	16	10	126	2.94	54203	36112	18420	8.9604	1.8085	Red
12469	P41217	OX2G_HUMAN	OX 2 membrane glycoprotein OS Homo sapiens GN CD200 PE 1 SV 4	Regular	51.3308	42.71	31663.6	2	2	17	9.35	3001	4671	1818	1.159	0.0367	Red
4923	Q9Y3R5	DOP2_HUMAN	Protein dopey 2 OS Homo sapiens GN DOPEY2 PE 1 SV 5	Regular	51.2518	42.68	260512	34	16	173	4.48	67665	24600	48058	6.104	1.5902	Red
7606	Q9H583	HEAT1_HUMAN	HEAT repeat containing protein 1 OS Homo sapiens GN HEATR1 PE 1 SV 3	Regular	51.2086	42.66	244538	17	9	168	3.87	47299	23620	30409	5.8608	1.4332	Red
14418	P10745	RET3_HUMAN	Retinol binding protein 3 OS Homo sapiens GN RBP3 PE 1 SV 2	Regular	51.1852	42.63	135819	10	5	68	3.77	36221	16416	19571	4.0733	0.5532	Red
8763	P08237	K6PF_HUMAN	6 phosphofructokinase muscle type OS Homo sapiens GN PFKM PE 1 SV 2	Regular	51.1756	42.61	86038.1	10	5	54	6.67	44796	30292	19467	7.5163	0.6467	Red
9994	Q99698	LYST_HUMAN	Lysosomal trafficking regulator OS Homo sapiens GN LYST PE 1 SV 3	Regular	51.117	42.58	434443	50	26	273	3.81	229169	53325	66637	13.2315	5.7483	Red
8583	Q14571	ITPR2_HUMAN	Inositol 1 4 5 trisphosphate receptor type 2 OS Homo sapiens GN ITPR2 PE 1 SV 2	Regular	51.0722	42.56	311258	45	24	217	3.7	192703	37520	51538	9.3098	2.8977	Red	590 26355 37247 4755 8584 38110 788 38490 11610 36249 13946 25351 8582
7649	Q5GLZ8	HERC4_HUMAN	Probable E3 ubiquitin protein ligase HERC4 OS Homo sapiens GN HERC4 PE 1 SV 1	Regular	50.9463	42.67	119989	10	5	82	4.26	10196	7598	9463	1.8853	0.2262	Red
5118	Q8TD57	DYH3_HUMAN	Dynein heavy chain 3 axonemal OS Homo sapiens GN DNAH3 PE 2 SV 1	Regular	50.726	42.68	474080	75	35	343	3.64	287707	43241	124827	10.7293	5.0866	Red	5121 5116
9322	Q86UP2	KTN1_HUMAN	Kinectin OS Homo sapiens GN KTN1 PE 1 SV 1	Regular	50.7192	42.65	156561	19	13	166	3.46	93714	32947	34249	8.1751	1.2799	Red
18203	P07996	TSP1_HUMAN	Thrombospondin 1 OS Homo sapiens GN THBS1 PE 1 SV 2	Regular	50.6763	42.66	133375	26	10	101	1.97	325519	7930.5	174296	1.9678	0.2625	Red
1734	P51587	BRCA2_HUMAN	Breast cancer type 2 susceptibility protein OS Homo sapiens GN BRCA2 PE 1 SV 2	Regular	50.5904	42.77	388560	43	29	290	2.95	232757	43266	75524	10.7355	4.1714	Red
18754	Q96JH7	VCIP1_HUMAN	Deubiquitinating protein VCIP135 OS Homo sapiens GN VCPIP1 PE 1 SV 2	Regular	50.5085	42.81	135689	24	12	110	3.52	91476	19197	41990	4.7633	0.6463	Red
11596	Q14207	NPAT_HUMAN	Protein NPAT OS Homo sapiens GN NPAT PE 1 SV 3	Regular	50.4906	42.78	155602	8	5	93	0.91	48971	9645	11948	2.3932	0.3724	Red
17404	Q8NI27	THOC2_HUMAN	THO complex subunit 2 OS Homo sapiens GN THOC2 PE 1 SV 2	Regular	50.4447	42.89	184657	24	11	159	2.07	34339	7954	16819	1.9736	0.3644	Red
9112	Q53HC5	KLH26_HUMAN	Kelch like protein 26 OS Homo sapiens GN KLHL26 PE 1 SV 2	Regular	50.4053	42.9	69223.1	8	4	48	5.2	45047	49509	8037	12.2846	0.8504	Red
3841	Q10570	CPSF1_HUMAN	Cleavage and polyadenylation specificity factor subunit 1 OS Homo sapiens GN CPSF1 PE 1 SV 2	Regular	50.2905	42.91	162139	19	10	109	3.12	31166	12604	17763	3.1274	0.5071	Red
15841	Q8TEC5	SH3R2_HUMAN	Putative E3 ubiquitin protein ligase SH3RF2 OS Homo sapiens GN SH3RF2 PE 1 SV 3	Regular	50.2085	42.95	80118.2	11	5	49	3.84	12330	11943	10130	2.9634	0.2374	Red
1066	Q8IW93	ARHGJ_HUMAN	Rho guanine nucleotide exchange factor 19 OS Homo sapiens GN ARHGEF19 PE 2 SV 1	Regular	50.1661	42.99	90052.9	15	8	63	1.87	50633	11404.5	18898	2.8298	0.2548	Red
9852	Q5S007	LRRK2_HUMAN	Leucine rich repeat serine threonine protein kinase 2 OS Homo sapiens GN LRRK2 PE 1 SV 2	Regular	50.1244	43	289753	27	16	195	1.66	548270	470098	196367	116.645	33.7982	Red
3154	Q8N655	CJ012_HUMAN	Uncharacterized protein C10orf12 OS Homo sapiens GN C10orf12 PE 1 SV 1	Regular	50.0685	43	138592	16	10	108	4.49	65883	22036	61458	5.4678	0.7578	Red
6961	O94923	GLCE_HUMAN	D glucuronyl C5 epimerase OS Homo sapiens GN GLCE PE 1 SV 3	Regular	50.0681	42.98	70443.3	10	7	46	2.92	42686	24315	8443	6.0332	0.425	Red
788	Q12955	ANK3_HUMAN	Ankyrin 3 OS Homo sapiens GN ANK3 PE 1 SV 3	Regular	50.0025	43.05	482692	44	29	361	3.68	245046	53909	82179	13.3764	6.4567	Red	590 26355 37247 4755 36249 8583 38110 38490 11610 13946 25351 786 8582
15625	Q58EX2	SDK2_HUMAN	Protein sidekick 2 OS Homo sapiens GN SDK2 PE 1 SV 3	Regular	49.999	43.03	240309	22	17	141	4.01	187648	17177	16807	4.2621	1.0242	Red
12887	Q15118	PDK1_HUMAN	Pyruvate dehydrogenase lipoamide kinase isozyme 1 mitochondrial OS Homo sapiens GN PDK1 PE 1 SV	Regular	49.8312	43.1	49472.4	13	7	35	9.63	31900	12107	10732	3.0041	0.1486	Red	12879
9906	Q86TE4	LUZP2_HUMAN	Leucine zipper protein 2 OS Homo sapiens GN LUZP2 PE 2 SV 2	Regular	49.7838	43.11	39299.9	2	2	33	4.62	9504	11499	5218	2.8532	0.1121	Red
15574	Q9UQD0	SCN8A_HUMAN	Sodium channel protein type 8 subunit alpha OS Homo sapiens GN SCN8A PE 1 SV 1	Regular	49.7647	43.12	227505	21	9	115	0.45	37372	10641	30574	2.6403	0.6007	Red	15566 15564
8404	Q75QN2	INT8_HUMAN	Integrator complex subunit 8 OS Homo sapiens GN INTS8 PE 1 SV 1	Regular	49.6849	43.15	114571	8	5	81	7.04	162640	160504	11277	39.8256	4.5629	Red
9800	Q6P9F7	LRC8B_HUMAN	Leucine rich repeat containing protein 8B OS Homo sapiens GN LRRC8B PE 2 SV 2	Regular	49.3462	43.35	93587.5	10	6	51	6.6	17295	4837	11474	1.2002	0.1123	Red
4847	Q8TDJ6	DMXL2_HUMAN	DmX like protein 2 OS Homo sapiens GN DMXL2 PE 1 SV 2	Regular	49.2639	43.42	343178	36	19	212	5.17	75515	20670	40521	5.1288	1.7601	Red
15529	Q99884	SC6A7_HUMAN	Sodium dependent proline transporter OS Homo sapiens GN SLC6A7 PE 2 SV 2	Regular	48.9712	43.53	71709.2	4	3	29	3.77	18498	23752.5	16868	5.8937	0.4226	Red
13435	Q9QC07	POK7_HUMAN	HERV K 1q23 3 provirus ancestral Pol protein OS Homo sapiens PE 3 SV 2	Regular	48.9329	43.5	92803.1	15	6	63	1.72	209183	26329.5	62699	6.5331	0.6063	Red
941	Q9H1A4	APC1_HUMAN	Anaphase promoting complex subunit 1 OS Homo sapiens GN ANAPC1 PE 1 SV 1	Regular	48.8762	43.54	218667	16	14	135	2.42	98815	43674	23971	10.8368	2.3696	Red
5023	O60469	DSCAM_HUMAN	Down syndrome cell adhesion molecule OS Homo sapiens GN DSCAM PE 1 SV 2	Regular	48.6965	43.55	224028	49	21	146	2.44	90756	30929	47176	7.6744	1.7193	Red
1319	Q96BY7	ATG2B_HUMAN	Autophagy related protein 2 homolog B OS Homo sapiens GN ATG2B PE 1 SV 5	Regular	48.6299	43.59	234645	27	13	148	1.97	332250	29674	96022	7.363	1.7277	Red
4651	O75140	DEPD5_HUMAN	DEP domain containing protein 5 OS Homo sapiens GN DEPDC5 PE 2 SV 1	Regular	48.5607	43.75	179564	21	11	113	2.61	45763	14963	19196	3.7127	0.6667	Red
16657	Q9BXU1	STK31_HUMAN	Serine threonine protein kinase 31 OS Homo sapiens GN STK31 PE 2 SV 2	Regular	48.4471	43.76	116721	10	6	92	2.16	23266	13308	11928	3.3021	0.3854	Red
13958	Q13332	PTPRS_HUMAN	Receptor type tyrosine protein phosphatase S OS Homo sapiens GN PTPRS PE 1 SV 3	Regular	48.4456	43.73	218296	21	12	123	3.34	104061	6555	31091	1.6265	0.3551	Red	13946
1179	Q8WXK4	ASB12_HUMAN	Ankyrin repeat and SOCS box protein 12 OS Homo sapiens GN ASB12 PE 1 SV 2	Regular	48.4188	43.71	34456.2	5	2	18	12.3	18812	28218	6917	7.0017	0.2413	Red
3136	Q9P2M7	CING_HUMAN	Cingulin OS Homo sapiens GN CGN PE 1 SV 2	Regular	48.0619	43.84	136614	23	11	126	2.34	50688	26450	26191	6.563	0.8966	Red
10525	Q15759	MK11_HUMAN	Mitogen activated protein kinase 11 OS Homo sapiens GN MAPK11 PE 1 SV 2	Regular	47.9258	43.94	41585.4	4	6	25	11.26	27749	6236	8820	1.5473	0.0643	Red
224	Q86UK0	ABCAC_HUMAN	ATP binding cassette sub family A member 12 OS Homo sapiens GN ABCA12 PE 1 SV 3	Regular	47.8537	43.91	295575	25	14	177	1.89	54149	7914	26452	1.9637	0.5804	Red
15741	Q7Z333	SETX_HUMAN	Probable helicase senataxin OS Homo sapiens GN SETX PE 1 SV 4	Regular	47.8535	43.89	307214	35	22	234	2.05	112259	17328	29664	4.2996	1.3209	Red	19579
10287	Q9Y6D9	MD1L1_HUMAN	Mitotic spindle assembly checkpoint protein MAD1 OS Homo sapiens GN MAD1L1 PE 1 SV 2	Regular	47.8149	43.9	83352.2	22	12	79	5.57	124811	25189	23110	6.2501	0.521	Red
8551	P06756	ITAV_HUMAN	Integrin alpha V OS Homo sapiens GN ITGAV PE 1 SV 2	Regular	47.7933	43.9	117122	11	6	79	4.2	22158	5369	11148	1.3322	0.156	Red
15285	P50443	S26A2_HUMAN	Sulfate transporter OS Homo sapiens GN SLC26A2 PE 1 SV 2	Regular	47.721	43.88	82688.1	10	4	48	2.71	9958	2904	7378	0.7206	0.0596	Red
4908	Q96N67	DOCK7_HUMAN	Dedicator of cytokinesis protein 7 OS Homo sapiens GN DOCK7 PE 1 SV 4	Regular	47.6591	43.95	244443	34	19	159	3.88	198046	28936	46231	7.1798	1.7551	Red
13661	Q13029	PRDM2_HUMAN	PR domain zinc finger protein 2 OS Homo sapiens GN PRDM2 PE 1 SV 3	Regular	47.6239	43.95	191254	13	5	129	2.44	25540	10888.5	13578	2.7017	0.5167	Red
4178	O60716	CTND1_HUMAN	Catenin delta 1 OS Homo sapiens GN CTNND1 PE 1 SV 1	Regular	47.6173	43.93	108740	9	5	83	1.24	125979	12807	20202	3.1778	0.3456	Red	4179 13247
856	Q8NB46	ANR52_HUMAN	Serine threonine protein phosphatase 6 regulatory ankyrin repeat subunit C OS Homo sapiens GN ANKRD5	Regular	47.5601	43.97	116902	6	4	69	3.35	124695	180612	34839	44.815	5.239	Red
8643	Q14667	K0100_HUMAN	UPF0378 protein KIAA0100 OS Homo sapiens GN KIAA0100 PE 1 SV 3	Regular	47.4216	44.03	256267	16	11	143	2.24	96781	13990	18201	3.4713	0.8896	Red	14491 1590 24989 17273 39279
5277	P01133	EGF_HUMAN	Pro epidermal growth factor OS Homo sapiens GN EGF PE 1 SV 2	Regular	47.3539	44.07	137701	16	8	83	6.63	57896	6991	29741	1.7347	0.2389	Red
5492	P54753	EPHB3_HUMAN	Ephrin type B receptor 3 OS Homo sapiens GN EPHB3 PE 1 SV 2	Regular	47.2856	44.05	111927	12	5	75	1.4	65790	12645	25676	3.1376	0.3512	Red	5485 5491
12898	Q9P2J9	PDP2_HUMAN	Pyruvate dehydrogenase acetyl transferring phosphatase 2 mitochondrial OS Homo sapiens GN PDP2	Regular	47.2755	44.02	60434.4	12	5	38	2.46	28529	4299	13955	1.0667	0.0645	Red
1377	Q13535	ATR_HUMAN	Serine threonine protein kinase ATR OS Homo sapiens GN ATR PE 1 SV 3	Regular	47.198	44.03	304960	41	17	206	2.57	64520	19115	41987	4.743	1.4464	Red
11837	Q149M9	NWD1_HUMAN	NACHT and WD repeat domain containing protein 1 OS Homo sapiens GN NWD1 PE 2 SV 3	Regular	47.0507	44.13	176947	18	7	128	2.75	32412	24717	20674	6.133	1.0852	Red
9410	O15230	LAMA5_HUMAN	Laminin subunit alpha 5 OS Homo sapiens GN LAMA5 PE 1 SV 8	Regular	46.9906	44.1	412284	40	21	235	3.68	109320	17102	37860	4.2435	1.7495	Red
15471	O94885	SASH1_HUMAN	SAM and SH3 domain containing protein 1 OS Homo sapiens GN SASH1 PE 1 SV 3	Regular	46.99	44.08	137737	12	9	93	3.13	102067	25188.1	35654	6.2499	0.8608	Red	4441
13946	P23468	PTPRD_HUMAN	Receptor type tyrosine protein phosphatase delta OS Homo sapiens GN PTPRD PE 1 SV 2	Regular	46.9466	44.15	215787	25	13	131	2.72	142913	31657	28060	7.855	1.695	Red	590 13958 26355 37247 4755 38110 8583 788 38490 11610 36249 25351 8582
12498	Q9UBL9	P2RX2_HUMAN	P2X purinoceptor 2 OS Homo sapiens GN P2RX2 PE 2 SV 1	Regular	46.9452	44.12	52609.6	9	4	25	3.82	17720	7531.5	6065	1.8688	0.0983	Red
1638	Q9Y6D5	BIG2_HUMAN	Brefeldin A inhibited guanine nucleotide exchange protein 2 OS Homo sapiens GN ARFGEF2 PE 1 SV 3	Regular	46.8726	44.16	204548	30	15	143	1.9	446626	17437	133352	4.3266	0.885	Red	1637
4777	O75165	DJC13_HUMAN	DnaJ homolog subfamily C member 13 OS Homo sapiens GN DNAJC13 PE 1 SV 5	Regular	46.8324	44.16	256696	30	19	179	2.59	489753	111757	58499	27.7301	7.1182	Red
8651	Q5VV43	K0319_HUMAN	Dyslexia associated protein KIAA0319 OS Homo sapiens GN KIAA0319 PE 1 SV 1	Regular	46.7362	44.17	118903	18	7	74	2.24	22924	6895.5	17273	1.711	0.2034	Red
2766	O94986	CE152_HUMAN	Centrosomal protein of 152 kDa OS Homo sapiens GN CEP152 PE 1 SV 3	Regular	46.7324	44.15	191124	22	14	158	1.27	84454	6409.88	29833	1.5905	0.304	Red	28927 4503 38376 33460 10929 5310 14158 31433 19578 5669
4641	Q5VZ89	DEN4C_HUMAN	DENN domain containing protein 4C OS Homo sapiens GN DENND4C PE 1 SV 2	Regular	46.7264	44.12	188682	21	13	126	3.83	46015	12182	23000	3.0227	0.5703	Red
17269	Q68CZ2	TENS3_HUMAN	Tensin 3 OS Homo sapiens GN TNS3 PE 1 SV 2	Regular	46.6494	44.22	156463	17	9	96	6.09	34496	17127	13807	4.2497	0.6649	Red	17265
11549	P69849	NOMO3_HUMAN	Nodal modulator 3 OS Homo sapiens GN NOMO3 PE 2 SV 2	Regular	46.5803	44.2	135103	10	5	83	2.86	43998	5622	7930	1.395	0.1885	Red
5487	Q15375	EPHA7_HUMAN	Ephrin type A receptor 7 OS Homo sapiens GN EPHA7 PE 1 SV 3	Regular	46.5773	44.17	113808	9	4	71	1.5	31771	6597	13387	1.6369	0.1863	Red	5488
15682	Q7Z6J9	SEN54_HUMAN	tRNA splicing endonuclease subunit Sen54 OS Homo sapiens GN TSEN54 PE 1 SV 3	Regular	46.5012	44.21	59332.6	13	5	41	3.04	14362	2706	10282	0.6714	0.0398	Yellow
5022	Q14574	DSC3_HUMAN	Desmocollin 3 OS Homo sapiens GN DSC3 PE 1 SV 3	Regular	46.4637	44.18	101281	6	5	74	3.79	29930	13603.5	7236	3.3754	0.3419	Red
18132	Q96QT4	TRPM7_HUMAN	Transient receptor potential cation channel subfamily M member 7 OS Homo sapiens GN TRPM7 PE 1 SV 1	Regular	46.4049	44.25	214807	30	15	142	1.66	93394	10834.5	21655	2.6883	0.5775	Red
5119	Q8TE73	DYH5_HUMAN	Dynein heavy chain 5 axonemal OS Homo sapiens GN DNAH5 PE 1 SV 3	Regular	46.3715	44.29	532843	67	32	386	3.48	251413	56074	95775	13.9136	7.4137	Red	5122
19809	Q9H8G1	ZN430_HUMAN	Zinc finger protein 430 OS Homo sapiens GN ZNF430 PE 2 SV 3	Regular	46.3662	44.26	68200.5	12	5	49	1.75	104214	52980	16860	13.1459	0.8966	Red	19655 19651
5526	Q03468	ERCC6_HUMAN	DNA excision repair protein ERCC 6 OS Homo sapiens GN ERCC6 PE 1 SV 1	Regular	46.3525	44.24	169557	17	13	107	2.48	38291	2501.49	13858	0.6207	0.1052	Red	11008 37716
13280	Q9NUQ2	PLCE_HUMAN	1 acyl sn glycerol 3 phosphate acyltransferase epsilon OS Homo sapiens GN AGPAT5 PE 1 SV 3	Regular	46.334	44.22	42414.4	10	5	33	6.32	20142	6951	10042	1.7247	0.0732	Red
19536	Q9HCK1	ZDBF2_HUMAN	DBF4 type zinc finger containing protein 2 OS Homo sapiens GN ZDBF2 PE 1 SV 3	Regular	46.2311	44.25	268755	15	9	182	3.48	109538	92824	24093	23.0323	6.19	Red
13639	Q9BXM0	PRAX_HUMAN	Periaxin OS Homo sapiens GN PRX PE 1 SV 2	Regular	46.1996	44.23	155247	11	10	92	3.7	104225	49443	9231	12.2682	1.9046	Red
9749	P50851	LRBA_HUMAN	Lipopolysaccharide responsive and beige like anchor protein OS Homo sapiens GN LRBA PE 1 SV 4	Regular	46.1694	44.2	321789	31	16	205	2.41	163432	61604	52851	15.2857	4.9188	Red
17816	O95271	TNKS1_HUMAN	Tankyrase 1 OS Homo sapiens GN TNKS PE 1 SV 2	Regular	46.1619	44.18	143808	13	11	100	3.24	29549	6926	17371	1.7185	0.2471	Red	17817
3129	Q96RK0	CIC_HUMAN	Protein capicua homolog OS Homo sapiens GN CIC PE 1 SV 2	Regular	46.0331	44.25	164390	14	9	90	1.74	44019	10886	20887	2.7011	0.444	Red
10869	P42345	MTOR_HUMAN	Serine threonine protein kinase mTOR OS Homo sapiens GN MTOR PE 1 SV 1	Regular	46.0172	44.22	290945	39	17	204	1.29	307502	109159	71740	27.0855	7.8804	Red
14495	Q2PPJ7	RGPA2_HUMAN	Ral GTPase activating protein subunit alpha 2 OS Homo sapiens GN RALGAPA2 PE 1 SV 2	Regular	45.9661	44.2	213222	15	5	146	2.72	59069	44790	27396	11.1137	2.3697	Red
2744	Q9H799	CE042_HUMAN	Uncharacterized protein C5orf42 OS Homo sapiens GN C5orf42 PE 1 SV 4	Regular	45.9023	44.21	365510	33	23	232	4.07	83790	11997	41733	2.9768	1.088	Red
12666	Q8TEW0	PARD3_HUMAN	Partitioning defective 3 homolog OS Homo sapiens GN PARD3 PE 1 SV 2	Regular	45.8925	44.18	151937	25	11	118	2.21	86350	22666	38430	5.6241	0.8545	Red
2681	Q9NYV4	CDK12_HUMAN	Cyclin dependent kinase 12 OS Homo sapiens GN CDK12 PE 1 SV 2	Regular	45.8663	44.16	164839	10	8	117	2.75	56566	15190.8	12056	3.7693	0.6213	Red	2694
14254	Q9Y3P9	RBGP1_HUMAN	Rab GTPase activating protein 1 OS Homo sapiens GN RABGAP1 PE 1 SV 3	Regular	45.8507	44.17	122992	12	10	90	2.43	56691	40821	12322	10.1289	1.2458	Red
18662	Q6BDS2	URFB1_HUMAN	UHRF1 binding protein 1 OS Homo sapiens GN UHRF1BP1 PE 1 SV 1	Regular	45.77	44.17	160683	9	9	112	6.04	42907	18722	9489	4.6455	0.7464	Red
8949	Q9ULH0	KDIS_HUMAN	Kinase D interacting substrate of 220 kDa OS Homo sapiens GN KIDINS220 PE 1 SV 3	Regular	45.7414	44.18	198139	23	14	145	5.7	142023	28879	43807	7.1657	1.4198	Yellow
1631	Q96G01	BICD1_HUMAN	Protein bicaudal D homolog 1 OS Homo sapiens GN BICD1 PE 1 SV 3	Regular	45.6694	44.18	111320	13	5	91	2.87	113809	59732	15347	14.8212	1.6499	Red	1632
846	Q8N283	ANR35_HUMAN	Ankyrin repeat domain containing protein 35 OS Homo sapiens GN ANKRD35 PE 2 SV 2	Regular	45.5607	44.25	110878	33	15	87	5.39	144366	10317	44588	2.5599	0.2838	Red
11692	Q7Z2Y5	NRK_HUMAN	Nik related protein kinase OS Homo sapiens GN NRK PE 2 SV 2	Regular	45.5476	44.25	179620	15	8	120	1.33	32398	24801	18657	6.1538	1.1054	Red
18321	Q5TAX3	TUT4_HUMAN	Terminal uridylyltransferase 4 OS Homo sapiens GN ZCCHC11 PE 1 SV 3	Regular	45.4574	44.32	188131	23	13	162	4.99	100207	41519	62231	10.3021	1.9381	Red	18322
4829	P11532	DMD_HUMAN	Dystrophin OS Homo sapiens GN DMD PE 1 SV 3	Regular	45.2818	44.41	428803	56	33	318	3.61	260137	28987	82896	7.1925	3.0842	Red
9013	P46013	KI67_HUMAN	Antigen KI 67 OS Homo sapiens GN MKI67 PE 1 SV 2	Regular	45.2421	44.42	360918	65	27	333	3.13	245217	31470	76688	7.8086	2.8183	Red
15448	Q5K651	SAMD9_HUMAN	Sterile alpha motif domain containing protein 9 OS Homo sapiens GN SAMD9 PE 1 SV 1	Regular	45.177	44.42	185821	17	10	135	3.27	55528	16703	30900	4.1445	0.7701	Red	15441
17993	O60296	TRAK2_HUMAN	Trafficking kinesin binding protein 2 OS Homo sapiens GN TRAK2 PE 1 SV 2	Regular	45.1214	44.43	102332	15	10	70	6.02	55958	19540	15345	4.8484	0.4961	Red
1049	Q8TER5	ARH40_HUMAN	Rho guanine nucleotide exchange factor 40 OS Homo sapiens GN ARHGEF40 PE 1 SV 3	Regular	45.1014	44.4	166369	22	12	109	3.42	122825	58880	34591	14.6098	2.4306	Red
10151	P11137	MAP2_HUMAN	Microtubule associated protein 2 OS Homo sapiens GN MAP2 PE 1 SV 4	Regular	45.0891	44.38	199983	20	16	186	3.72	141851	71515	49502	17.7449	3.5487	Red
6122	Q6V0I7	FAT4_HUMAN	Protocadherin Fat 4 OS Homo sapiens GN FAT4 PE 1 SV 2	Regular	45.0027	44.44	546622	58	29	299	2.23	238960	18217	88844	4.5202	2.4708	Red
787	Q01484	ANK2_HUMAN	Ankyrin 2 OS Homo sapiens GN ANK2 PE 1 SV 4	Regular	44.9439	44.48	436224	56	27	326	2.27	197213	76759	70890	19.0461	8.3084	Red
6824	P35573	GDE_HUMAN	Glycogen debranching enzyme OS Homo sapiens GN AGL PE 1 SV 3	Regular	44.8988	44.46	176931	26	12	126	3.39	84434	6153	20384	1.5267	0.2701	Red
14007	A1KZ92	PXDNL_HUMAN	Peroxidasin like protein OS Homo sapiens GN PXDNL PE 2 SV 3	Regular	44.8533	44.43	166310	18	9	117	2.05	58242	12294	25799	3.0505	0.5073	Red
11199	Q15596	NCOA2_HUMAN	Nuclear receptor coactivator 2 OS Homo sapiens GN NCOA2 PE 1 SV 2	Regular	44.7529	44.5	160012	22	8	89	3.07	29702	4977	27944	1.2349	0.1976	Red
10999	Q9UM54	MYO6_HUMAN	Unconventional myosin VI OS Homo sapiens GN MYO6 PE 1 SV 4	Regular	44.6494	44.56	151060	24	14	110	4.48	100799	20613	33459	5.1147	0.7726	Red
12976	O43933	PEX1_HUMAN	Peroxisome biogenesis factor 1 OS Homo sapiens GN PEX1 PE 1 SV 1	Regular	44.5834	44.54	143894	17	10	97	7.25	33736	10767	18472	2.6716	0.3844	Red
4846	Q9Y485	DMXL1_HUMAN	DmX like protein 1 OS Homo sapiens GN DMXL1 PE 1 SV 3	Regular	44.4206	44.57	341660	30	17	196	2.48	74431	26826	37392	6.6563	2.2742	Red
2364	Q8N6L0	CC155_HUMAN	Coiled coil domain containing protein 155 OS Homo sapiens GN CCDC155 PE 2 SV 2	Regular	44.4075	44.55	63239.2	12	4	48	2.31	29193	7803	11502	1.9361	0.1224	Red
4578	Q13206	DDX10_HUMAN	Probable ATP dependent RNA helicase DDX10 OS Homo sapiens GN DDX10 PE 1 SV 2	Regular	44.2931	44.58	101230	16	7	74	6.63	1173602	20959	160318	5.2005	0.5265	Red
10997	Q9ULV0	MYO5B_HUMAN	Unconventional myosin Vb OS Homo sapiens GN MYO5B PE 1 SV 3	Regular	44.271	44.59	215270	26	16	169	4.27	71793	9175	32957	2.2766	0.4901	Red	10996
5112	Q96DT5	DYH11_HUMAN	Dynein heavy chain 11 axonemal OS Homo sapiens GN DNAH11 PE 1 SV 3	Regular	44.2512	44.59	525207	67	34	354	2.06	475492	80081	92645	19.8704	10.4361	Red	5123
4089	Q12996	CSTF3_HUMAN	Cleavage stimulation factor subunit 3 OS Homo sapiens GN CSTF3 PE 1 SV 1	Regular	44.2451	44.57	83377.9	9	4	60	2.93	33454	34074	8122	8.4547	0.7049	Red
18275	Q86TV6	TTC7B_HUMAN	Tetratricopeptide repeat protein 7B OS Homo sapiens GN TTC7B PE 1 SV 3	Regular	44.1958	44.55	95034.8	3	3	56	2.14	11664	6318	8320	1.5677	0.149	Red
2372	Q8NDH2	CC168_HUMAN	Coiled coil domain containing protein 168 OS Homo sapiens GN CCDC168 PE 2 SV 2	Regular	44.1486	44.52	279776	44	24	221	4.45	165189	66463	72495	16.4914	4.6139	Red
18983	Q9NNW5	WDR6_HUMAN	WD repeat containing protein 6 OS Homo sapiens GN WDR6 PE 1 SV 1	Regular	44.0873	44.53	123664	19	7	71	2.5	49699	12898.5	12091	3.2005	0.3958	Red
19563	P31629	ZEP2_HUMAN	Transcription factor HIVEP2 OS Homo sapiens GN HIVEP2 PE 1 SV 2	Regular	44.0109	44.53	271278	28	17	170	3.68	106830	44082	48902	10.938	2.9672	Red	13526 13527
11347	Q96JN8	NEUL4_HUMAN	Neuralized like protein 4 OS Homo sapiens GN NEURL4 PE 1 SV 2	Regular	43.9612	44.54	168675	17	8	93	4.55	54004	5446	19194	1.3513	0.2279	Red
14528	A5PLK6	RGSL_HUMAN	Regulator of G protein signaling protein like OS Homo sapiens GN RGSL1 PE 2 SV 1	Regular	43.7464	44.71	126886	16	10	85	2.23	106392	15696	26478	3.8946	0.4942	Red
9696	P36776	LONM_HUMAN	Lon protease homolog mitochondrial OS Homo sapiens GN LONP1 PE 1 SV 2	Regular	43.5614	44.77	107003	12	5	82	2.71	45266	29855	5728	7.4079	0.7927	Red
10716	Q6WCQ1	MPRIP_HUMAN	Myosin phosphatase Rho interacting protein OS Homo sapiens GN MPRIP PE 1 SV 3	Regular	43.5253	44.75	117332	17	10	102	3.71	99393	15262	16730	3.7869	0.4443	Red
17498	Q04725	TLE2_HUMAN	Transducin like enhancer protein 2 OS Homo sapiens GN TLE2 PE 1 SV 2	Regular	43.4357	44.76	81038.6	8	6	45	4.58	37849	6595	22178	1.6364	0.1326	Red
3666	Q17RW2	COOA1_HUMAN	Collagen alpha 1 XXIV chain OS Homo sapiens GN COL24A1 PE 2 SV 2	Regular	43.2482	44.84	176352	13	9	106	2.45	46596	27523	14161	6.8292	1.2044	Red
14895	Q13464	ROCK1_HUMAN	Rho associated protein kinase 1 OS Homo sapiens GN ROCK1 PE 1 SV 1	Regular	43.1147	44.88	159201	23	11	144	2.58	100342	9902	28688	2.457	0.3912	Red	1768
10559	Q8NEZ4	MLL3_HUMAN	Histone lysine N methyltransferase MLL3 OS Homo sapiens GN MLL3 PE 1 SV 3	Regular	43.0911	44.86	548613	69	33	320	2.14	188793	32741	68742	8.124	4.4569	Red
2428	Q2TAC2	CCD57_HUMAN	Coiled coil domain containing protein 57 OS Homo sapiens GN CCDC57 PE 2 SV 2	Regular	43.0846	44.83	103452	17	10	101	3.93	86462	21186	31202	5.2569	0.5438	Red
13204	Q96PX9	PKH4B_HUMAN	Pleckstrin homology domain containing family G member 4B OS Homo sapiens GN PLEKHG4B PE 2 SV 4	Regular	43.0696	44.81	141664	24	12	100	2.6	54427	25735	18439	6.3856	0.9046	Red
4753	Q9UPY3	DICER_HUMAN	Endoribonuclease Dicer OS Homo sapiens GN DICER1 PE 1 SV 3	Regular	43.0399	44.84	221419	23	14	148	1.77	111336	17159	41919	4.2576	0.9427	Red
18824	Q709C8	VP13C_HUMAN	Vacuolar protein sorting associated protein 13C OS Homo sapiens GN VPS13C PE 1 SV 1	Regular	43.0264	44.82	424729	36	25	295	1.57	123285	9877	57012	2.4508	1.0409	Red
8995	Q2KJY2	KI26B_HUMAN	Kinesin like protein KIF26B OS Homo sapiens GN KIF26B PE 1 SV 1	Regular	43.0256	44.8	226621	22	9	152	2.75	199459	118075	39570	29.2978	6.6395	Red	948
2782	P06731	CEAM5_HUMAN	Carcinoembryonic antigen related cell adhesion molecule 5 OS Homo sapiens GN CEACAM5 PE 1 SV 3	Regular	42.8863	44.8	77536.1	3	4	36	6.41	10176	11055	5717	2.7431	0.2127	Red
1637	Q9Y6D6	BIG1_HUMAN	Brefeldin A inhibited guanine nucleotide exchange protein 1 OS Homo sapiens GN ARFGEF1 PE 1 SV 2	Regular	42.876	44.78	210992	20	12	132	2.11	357916	24325	101591	6.0357	1.2735	Red	1638
13010	P16112	PGCA_HUMAN	Aggrecan core protein OS Homo sapiens GN ACAN PE 1 SV 2	Regular	42.7934	44.81	252132	11	5	76	0.33	80408	15690	15223	3.8931	0.9816	Red
19874	Q9HCE3	ZN532_HUMAN	Zinc finger protein 532 OS Homo sapiens GN ZNF532 PE 1 SV 2	Regular	42.552	44.79	144091	15	11	110	2	55715	21234	16682	5.2688	0.7592	Red
844	Q9BQI6	ANR32_HUMAN	Ankyrin repeat domain containing protein 32 OS Homo sapiens GN ANKRD32 PE 1 SV 2	Regular	42.4721	44.85	122533	15	5	82	4.06	15773	9405	11168	2.3336	0.2859	Red
16511	Q9UQ35	SRRM2_HUMAN	Serine arginine repetitive matrix protein 2 OS Homo sapiens GN SRRM2 PE 1 SV 2	Regular	42.4042	44.86	300357	20	15	189	1.71	84627	15272	44487	3.7894	1.1382	Red
469	Q96A70	ADC_HUMAN	Arginine decarboxylase OS Homo sapiens GN ADC PE 2 SV 1	Regular	42.2747	44.89	51006.2	7	3	31	4.78	29417	6921	10771	1.7173	0.0876	Red
7604	P42858	HD_HUMAN	Huntingtin OS Homo sapiens GN HTT PE 1 SV 2	Regular	42.2577	44.89	351596	37	17	207	3.06	187215	45121	40624	11.1958	3.9364	Red
19039	O95785	WIZ_HUMAN	Protein Wiz OS Homo sapiens GN WIZ PE 1 SV 2	Regular	42.2218	44.9	180328	32	12	138	3.94	49496	25139	27001	6.2377	1.1248	Red
9406	P25391	LAMA1_HUMAN	Laminin subunit alpha 1 OS Homo sapiens GN LAMA1 PE 1 SV 2	Regular	42.1572	44.88	346551	29	16	223	2.5	783116	725805	121183	180.093	62.4113	Red
13447	Q99575	POP1_HUMAN	Ribonucleases P MRP protein subunit POP1 OS Homo sapiens GN POP1 PE 1 SV 2	Regular	42.1276	44.85	116420	14	5	76	3.22	25986	12789	25840	3.1733	0.3694	Red
5122	Q96JB1	DYH8_HUMAN	Dynein heavy chain 8 axonemal OS Homo sapiens GN DNAH8 PE 1 SV 2	Regular	42.0391	44.97	518315	67	27	367	2.12	248584	139108	93224	34.5166	17.8905	Red	5119
8492	P48050	IRK4_HUMAN	Inward rectifier potassium channel 4 OS Homo sapiens GN KCNJ4 PE 1 SV 1	Regular	41.9931	44.97	50127.5	11	4	24	3.37	26956	6060	21366	1.5037	0.0754	Red
3583	P29400	CO4A5_HUMAN	Collagen alpha 5 IV chain OS Homo sapiens GN COL4A5 PE 1 SV 2	Regular	41.9051	45.03	162185	15	9	85	1.66	63956	51975	31454	12.8965	2.0916	Red
9837	O75581	LRP6_HUMAN	Low density lipoprotein receptor related protein 6 OS Homo sapiens GN LRP6 PE 1 SV 2	Regular	41.6863	45.09	183452	19	10	105	2.17	86877	13575	28982	3.3683	0.6179	Red	9836
14540	Q9BYZ6	RHBT2_HUMAN	Rho related BTB domain containing protein 2 OS Homo sapiens GN RHOBTB2 PE 2 SV 2	Regular	41.6842	45.07	83653	12	5	53	2.75	138957	56769	15082	14.086	1.1783	Red
4179	Q9UQB3	CTND2_HUMAN	Catenin delta 2 OS Homo sapiens GN CTNND2 PE 1 SV 3	Regular	41.5421	45.18	133740	19	8	91	2.04	182965	16002	36905	3.9706	0.531	Red	13247 4178
5031	Q9UL01	DSE_HUMAN	Dermatan sulfate epimerase OS Homo sapiens GN DSE PE 1 SV 1	Regular	41.4355	45.16	110401	3	2	62	3.03	20330	30495	7401	7.5667	0.8354	Red
9129	Q8IXQ5	KLHL7_HUMAN	Kelch like protein 7 OS Homo sapiens GN KLHL7 PE 1 SV 2	Regular	41.4292	45.14	67132.4	9	5	51	3.07	42029	7311	9834	1.8141	0.1218	Red
18012	P02787	TRFE_HUMAN	Serotransferrin OS Homo sapiens GN TF PE 1 SV 3	Regular	41.3667	45.17	79345.1	7	4	76	3.87	55796	73999.5	10750	18.3614	1.4569	Red
8736	Q68DE3	K2018_HUMAN	Basic helix loop helix domain containing protein KIAA2018 OS Homo sapiens GN KIAA2018 PE 1 SV 3	Regular	41.3624	45.15	243677	12	9	109	4.01	44198	13393	13650	3.3232	0.8098	Red
18643	Q9P2D8	UNC79_HUMAN	Protein unc 79 homolog OS Homo sapiens GN UNC79 PE 2 SV 3	Regular	41.1529	45.15	299875	33	18	182	1.59	129688	13429.5	53207	3.3322	0.9993	Red
2810	Q9NYQ6	CELR1_HUMAN	Cadherin EGF LAG seven pass G type receptor 1 OS Homo sapiens GN CELSR1 PE 1 SV 1	Regular	41.1102	45.16	334562	28	20	200	4.05	83215	14930	34875	3.7046	1.2394	Red
8460	Q13576	IQGA2_HUMAN	Ras GTPase activating like protein IQGAP2 OS Homo sapiens GN IQGAP2 PE 1 SV 4	Regular	41.0245	45.21	181148	25	17	126	6.35	100603	13207	33652	3.277	0.5936	Red	8459 17273 36120
15564	P35498	SCN1A_HUMAN	Sodium channel protein type 1 subunit alpha OS Homo sapiens GN SCN1A PE 1 SV 2	Regular	40.8887	45.24	231025	26	12	133	1.69	40899	14437.5	23732	3.5824	0.8276	Red	15566 15574
9838	Q14114	LRP8_HUMAN	Low density lipoprotein receptor related protein 8 OS Homo sapiens GN LRP8 PE 1 SV 4	Regular	40.8294	45.22	109226	11	5	74	2.08	56103	46556	15259	11.5519	1.2618	Red
16393	Q8IUH8	SPP2C_HUMAN	Signal peptide peptidase like 2C OS Homo sapiens GN SPPL2C PE 1 SV 3	Regular	40.7996	45.28	75587.1	5	2	29	4.09	7567	11350.5	5892	2.8164	0.2129	Red
8976	Q13237	KGP2_HUMAN	cGMP dependent protein kinase 2 OS Homo sapiens GN PRKG2 PE 1 SV 1	Regular	40.7504	45.26	88116.6	20	9	74	1.31	84126	35622	17643	8.8388	0.7788	Red
9171	Q02156	KPCE_HUMAN	Protein kinase C epsilon type OS Homo sapiens GN PRKCE PE 1 SV 1	Regular	40.7306	45.24	85042.6	6	4	62	2.99	42480	8461.5	9625	2.0995	0.1786	Red
9041	Q6ZMV9	KIF6_HUMAN	Kinesin like protein KIF6 OS Homo sapiens GN KIF6 PE 1 SV 3	Regular	40.6633	45.29	93139.6	13	7	73	3.69	70312	51028	17876	12.6615	1.1793	Red
15888	O60292	SI1L3_HUMAN	Signal induced proliferation associated 1 like protein 3 OS Homo sapiens GN SIPA1L3 PE 1 SV 3	Regular	40.662	45.27	195922	19	12	144	2.64	66026	37783	21263	9.375	1.8368	Red
5133	Q9UQ16	DYN3_HUMAN	Dynamin 3 OS Homo sapiens GN DNM3 PE 1 SV 4	Regular	40.5355	45.3	98145.5	8	4	82	0.69	27592	27477	3610	6.8178	0.6691	Red
8963	P41229	KDM5C_HUMAN	Lysine specific demethylase 5C OS Homo sapiens GN KDM5C PE 1 SV 2	Regular	40.5229	45.28	178401	17	12	139	1.86	67394	4815	20841	1.1947	0.2131	Red
14051	Q9H0J4	QRIC2_HUMAN	Glutamine rich protein 2 OS Homo sapiens GN QRICH2 PE 2 SV 1	Regular	40.4854	45.26	181340	18	9	114	3.61	113810	51516	26046	12.7826	2.318	Red
10937	O75592	MYCB2_HUMAN	Probable E3 ubiquitin protein ligase MYCBP2 OS Homo sapiens GN MYCBP2 PE 1 SV 3	Regular	40.4505	45.24	518183	52	29	330	1.38	270085	58513	103970	14.5187	7.5234	Red	38864
8971	P23276	KELL_HUMAN	Kell blood group glycoprotein OS Homo sapiens GN KEL PE 1 SV 2	Regular	40.4089	45.24	83736.4	10	5	51	3.28	13493	3618	6819	0.8977	0.0752	Red
12806	Q9Y6V0	PCLO_HUMAN	Protein piccolo OS Homo sapiens GN PCLO PE 1 SV 4	Regular	40.3895	45.22	555045	41	29	344	2.92	334644	75341	104248	18.6943	10.3762	Red
18142	Q9Y4A5	TRRAP_HUMAN	Transformation transcription domain associated protein OS Homo sapiens GN TRRAP PE 1 SV 3	Regular	40.2293	45.33	442049	59	28	318	2.36	198871	37367	70893	9.2718	4.0986	Red
2666	Q69YH5	CDCA2_HUMAN	Cell division cycle associated protein 2 OS Homo sapiens GN CDCA2 PE 1 SV 2	Regular	40.2203	45.31	114216	8	6	85	4.2	35741	17900	8032	4.4415	0.5073	Red	5113 28254 15441 23044 32636 31365 1511 16071 13566
1262	P13637	AT1A3_HUMAN	Sodium potassium transporting ATPase subunit alpha 3 OS Homo sapiens GN ATP1A3 PE 1 SV 3	Regular	40.1176	45.31	113174	9	5	68	5.23	88506	40663.6	8127	10.0898	1.1419	Red	1261 1260
4889	P26358	DNMT1_HUMAN	DNA cytosine 5 methyltransferase 1 OS Homo sapiens GN DNMT1 PE 1 SV 2	Regular	40.0075	45.34	185504	23	12	144	1.42	90570	3370.5	25854	0.8363	0.1551	Red
10703	Q9NZW5	MPP6_HUMAN	MAGUK p55 subfamily member 6 OS Homo sapiens GN MPP6 PE 1 SV 2	Regular	40.003	45.32	61402.2	5	4	55	7.04	33937	11514	8789	2.857	0.1754	Red
17318	Q9Y5Q9	TF3C3_HUMAN	General transcription factor 3C polypeptide 3 OS Homo sapiens GN GTF3C3 PE 1 SV 1	Regular	39.9977	45.3	102071	17	8	57	1.58	67624	14223	28505	3.5291	0.3602	Red
9099	Q6JEL2	KLH10_HUMAN	Kelch like protein 10 OS Homo sapiens GN KLHL10 PE 2 SV 1	Regular	39.9878	45.3	69968.1	6	5	53	1.64	26630	8085	6474	2.0061	0.1404	Red
18550	O95071	UBR5_HUMAN	E3 ubiquitin protein ligase UBR5 OS Homo sapiens GN UBR5 PE 1 SV 2	Regular	39.9752	45.28	312546	34	16	205	0.96	118650	14386	32118	3.5696	1.1157	Red
17988	O00463	TRAF5_HUMAN	TNF receptor associated factor 5 OS Homo sapiens GN TRAF5 PE 1 SV 2	Regular	39.8602	45.36	65945.6	6	5	52	4.85	11940	7564	8125	1.8768	0.1238	Red
12768	Q9Y5H0	PCDG3_HUMAN	Protocadherin gamma A3 OS Homo sapiens GN PCDHGA3 PE 2 SV 2	Regular	39.793	45.42	101370	9	5	57	2.15	38182	21904.5	17558	5.4351	0.551	Red
530	Q9UHB7	AFF4_HUMAN	AF4 FMR2 family member 4 OS Homo sapiens GN AFF4 PE 1 SV 1	Regular	39.7757	45.42	127859	16	9	105	2.84	53990	8233.5	18075	2.043	0.2612	Red
9949	Q13342	LY10_HUMAN	Nuclear body protein SP140 OS Homo sapiens GN SP140 PE 2 SV 2	Regular	39.6998	45.45	100333	10	6	70	1.96	69974	2388	9553	0.5925	0.0595	Red
1728	Q12830	BPTF_HUMAN	Nucleosome remodeling factor subunit BPTF OS Homo sapiens GN BPTF PE 1 SV 3	Regular	39.4138	45.54	341000	38	23	225	2.23	182172	18317	64741	4.545	1.5498	Red
1686	Q13873	BMPR2_HUMAN	Bone morphogenetic protein receptor type 2 OS Homo sapiens GN BMPR2 PE 1 SV 2	Regular	39.3987	45.51	116513	8	4	71	3.08	12863	7851	4964	1.9481	0.227	Red
8733	Q14532	K1H2_HUMAN	Keratin type I cuticular Ha2 OS Homo sapiens GN KRT32 PE 1 SV 3	Regular	39.3038	45.52	51825.8	3	3	36	10.71	22763	11160	5231	2.7691	0.1435	Red
3971	P46108	CRK_HUMAN	Adapter molecule crk OS Homo sapiens GN CRK PE 1 SV 2	Regular	39.1928	45.52	33887.8	8	3	25	14.47	73334	11328	7880	2.8108	0.0953	Red
18270	Q8IYW2	TTC40_HUMAN	Tetratricopeptide repeat protein 40 OS Homo sapiens GN TTC40 PE 2 SV 3	Regular	39.1194	45.5	306980	33	16	191	2.17	95422	8891	39765	2.2061	0.6772	Red
8814	Q9NVX7	KBTB4_HUMAN	Kelch repeat and BTB domain containing protein 4 OS Homo sapiens GN KBTBD4 PE 1 SV 3	Regular	39.1124	45.51	59056.5	3	2	44	4.63	13023	19534.5	5355	4.8471	0.2863	Red
12728	Q96JQ0	PCD16_HUMAN	Protocadherin 16 OS Homo sapiens GN DCHS1 PE 2 SV 1	Regular	39.0792	45.48	346923	28	15	182	3.37	113146	48762	30646	12.0992	4.1975	Red
3574	P08123	CO1A2_HUMAN	Collagen alpha 2 I chain OS Homo sapiens GN COL1A2 PE 1 SV 7	Regular	39.0701	45.46	129827	9	6	88	2.42	24102	19191	11230	4.7618	0.6182	Red
1019	Q8WZ64	ARAP2_HUMAN	Arf GAP with Rho GAP domain ANK repeat and PH domain containing protein 2 OS Homo sapiens GN ARAP2	Regular	39.0578	45.44	195220	21	11	144	1.17	140309	8824.5	18557	2.1896	0.4275	Red
3014	Q9HCK8	CHD8_HUMAN	Chromodomain helicase DNA binding protein 8 OS Homo sapiens GN CHD8 PE 1 SV 5	Regular	38.9145	45.45	292344	35	18	168	2.29	130804	40056.9	34440	9.9393	2.9057	Red	3015 3013 3012
4370	Q96F07	CYFP2_HUMAN	Cytoplasmic FMR1 interacting protein 2 OS Homo sapiens GN CYFIP2 PE 1 SV 2	Regular	38.8904	45.42	150395	21	10	99	3.05	126649	35537.2	20068	8.8178	1.3261	Red	4369
8705	Q5JYT7	K1755_HUMAN	Uncharacterized protein KIAA1755 OS Homo sapiens GN KIAA1755 PE 2 SV 2	Regular	38.8245	45.45	132215	9	5	90	3.42	30178	25637	13474	6.3613	0.8411	Red
6137	P35555	FBN1_HUMAN	Fibrillin 1 OS Homo sapiens GN FBN1 PE 1 SV 3	Regular	38.7924	45.46	332882	14	10	191	2.37	45095	26057	19382	6.4655	2.1522	Red
9465	O95447	LCA5L_HUMAN	Lebercilin like protein OS Homo sapiens GN LCA5L PE 2 SV 1	Regular	38.7674	45.44	76903.9	10	5	63	1.19	37631	21939	9474	5.4437	0.4186	Red
16792	Q9BX26	SYCP2_HUMAN	Synaptonemal complex protein 2 OS Homo sapiens GN SYCP2 PE 2 SV 2	Regular	38.6827	45.52	177350	23	14	143	2.29	292190	12114	42344	3.0058	0.5331	Red
4898	Q96BY6	DOC10_HUMAN	Dedicator of cytokinesis protein 10 OS Homo sapiens GN DOCK10 PE 1 SV 3	Regular	38.676	45.5	251984	13	7	167	0.73	75093	32097	10589	7.9642	2.0068	Red
18504	Q9UPU5	UBP24_HUMAN	Ubiquitin carboxyl terminal hydrolase 24 OS Homo sapiens GN USP24 PE 1 SV 3	Regular	38.6083	45.53	297388	20	13	195	2.18	87039	32903	23326	8.1642	2.4279	Red
14964	Q684P5	RPGP2_HUMAN	Rap1 GTPase activating protein 2 OS Homo sapiens GN RAP1GAP2 PE 1 SV 2	Regular	38.5911	45.56	80569.3	6	5	47	1.23	18521	8895	5441	2.2071	0.1778	Red
3810	Q86W10	CP4Z1_HUMAN	Cytochrome P450 4Z1 OS Homo sapiens GN CYP4Z1 PE 2 SV 1	Regular	38.4263	45.58	59656.3	5	2	42	2.57	15118	12432	2697	3.0847	0.184	Red
3691	Q9UQ03	COR2B_HUMAN	Coronin 2B OS Homo sapiens GN CORO2B PE 2 SV 4	Regular	38.409	45.56	55523.8	3	5	38	2.71	27926	34986	9402	8.681	0.482	Red
2410	Q5VVM6	CCD30_HUMAN	Coiled coil domain containing protein 30 OS Homo sapiens GN CCDC30 PE 2 SV 1	Regular	38.346	45.54	91960.8	8	9	99	6.39	45655	9748	16802	2.4188	0.2224	Red
16008	Q9H156	SLIK2_HUMAN	SLIT and NTRK like protein 2 OS Homo sapiens GN SLITRK2 PE 1 SV 1	Regular	38.2758	45.55	96545.1	6	3	66	4.97	6537	6537	4557	1.622	0.1566	Red
8602	P23458	JAK1_HUMAN	Tyrosine protein kinase JAK1 OS Homo sapiens GN JAK1 PE 1 SV 2	Regular	38.1364	45.65	135102	13	7	109	4.68	55438	38227	23857	9.4852	1.2815	Red
17262	Q9P273	TEN3_HUMAN	Teneurin 3 OS Homo sapiens GN ODZ3 PE 2 SV 3	Regular	37.9831	45.73	305285	34	22	173	2.74	237194	10941	56275	2.7148	0.8288	Red	17261
654	P49419	AL7A1_HUMAN	Alpha aminoadipic semialdehyde dehydrogenase OS Homo sapiens GN ALDH7A1 PE 1 SV 5	Regular	37.8787	45.78	59057.5	6	3	39	6.49	11642	10795.5	6367	2.6787	0.1582	Red
18698	O14607	UTY_HUMAN	Histone demethylase UTY OS Homo sapiens GN UTY PE 1 SV 2	Regular	37.8188	45.79	151658	6	7	91	0.67	59744	4731	9833	1.1739	0.178	Red	8965
11498	Q14957	NMDE3_HUMAN	Glutamate NMDA receptor subunit epsilon 3 OS Homo sapiens GN GRIN2C PE 2 SV 3	Regular	37.7179	45.89	135692	19	6	78	3	33681	23505	20529	5.8323	0.7914	Red	11499
11097	P59047	NALP5_HUMAN	NACHT LRR and PYD domains containing protein 5 OS Homo sapiens GN NLRP5 PE 2 SV 2	Regular	37.6402	45.89	137080	13	4	82	1.25	112876	16422	18906	4.0748	0.5586	Red
13987	Q3MIT2	PUS10_HUMAN	Putative tRNA pseudouridine synthase Pus10 OS Homo sapiens GN PUS10 PE 1 SV 1	Regular	37.5946	45.9	60985.6	9	3	54	1.32	43474	46272	17927	11.4814	0.7002	Red
5045	Q9Y4J8	DTNA_HUMAN	Dystrobrevin alpha OS Homo sapiens GN DTNA PE 1 SV 2	Regular	37.5727	45.88	84699.6	14	7	59	2.29	56234	54103.5	19755	13.4246	1.1371	Red
8702	Q9C0D2	K1731_HUMAN	Centrosomal protein KIAA1731 OS Homo sapiens GN KIAA1731 PE 2 SV 4	Regular	37.5205	45.88	296716	31	18	189	3.61	138375	41162	38923	10.2135	3.0305	Red
4740	Q6P158	DHX57_HUMAN	Putative ATP dependent RNA helicase DHX57 OS Homo sapiens GN DHX57 PE 1 SV 2	Regular	37.5036	45.86	157201	15	9	98	2.02	77471	27410	41019	6.8012	1.0692	Red
17811	Q9UKE5	TNIK_HUMAN	TRAF2 and NCK interacting protein kinase OS Homo sapiens GN TNIK PE 1 SV 1	Regular	37.3645	45.99	155457	27	10	112	4.34	121641	63738	29437	15.8152	2.4586	Red	11011
1209	Q9NR48	ASH1L_HUMAN	Histone lysine N methyltransferase ASH1L OS Homo sapiens GN ASH1L PE 1 SV 2	Regular	37.3348	45.97	336383	40	25	241	2.46	154455	22084	54123	5.4797	1.8433	Red
8674	Q2LD37	K1109_HUMAN	Uncharacterized protein KIAA1109 OS Homo sapiens GN KIAA1109 PE 1 SV 2	Regular	37.263	45.97	559703	63	33	336	2.66	479679	314774	99780	78.1044	43.7152	Red
18963	O94967	WDR47_HUMAN	WD repeat containing protein 47 OS Homo sapiens GN WDR47 PE 1 SV 1	Regular	37.1595	46.02	103489	11	5	62	6.31	26555	6376.5	14366	1.5822	0.1637	Red
16158	Q53GS9	SNUT2_HUMAN	U4 U6 U5 tri snRNP associated protein 2 OS Homo sapiens GN USP39 PE 1 SV 2	Regular	37.1008	46	65779.8	7	3	58	3.36	13917	5769	4845	1.4315	0.0942	Red
2414	Q494V2	CCD37_HUMAN	Coiled coil domain containing protein 37 OS Homo sapiens GN CCDC37 PE 1 SV 1	Regular	37.099	45.98	71345.4	8	4	54	4.09	11050	5694	5802	1.4128	0.1008	Red
2446	Q76M96	CCD80_HUMAN	Coiled coil domain containing protein 80 OS Homo sapiens GN CCDC80 PE 1 SV 1	Regular	37.067	45.96	108573	12	7	82	1.68	52098	22623	12808	5.6134	0.6095	Red
1341	Q13315	ATM_HUMAN	Serine protein kinase ATM OS Homo sapiens GN ATM PE 1 SV 3	Regular	37.0505	45.94	355791	44	24	255	2.72	134635	25750	40260	6.3893	2.2733	Red
7449	Q96GX5	GWL_HUMAN	Serine threonine protein kinase greatwall OS Homo sapiens GN MASTL PE 1 SV 1	Regular	36.9888	45.97	98459.8	12	8	64	1.25	373509	30084	42185	7.4647	0.735	Red
13660	O75626	PRDM1_HUMAN	PR domain zinc finger protein 1 OS Homo sapiens GN PRDM1 PE 1 SV 2	Regular	36.8149	46.04	93025.4	12	5	66	1.94	38811	9984	33396	2.4773	0.2305	Red
5114	Q0VDD8	DYH14_HUMAN	Dynein heavy chain 14 axonemal OS Homo sapiens GN DNAH14 PE 2 SV 3	Regular	36.7743	46.05	404172	57	27	268	2.31	435084	190410	70575	47.2462	19.0956	Red
7106	Q13439	GOGA4_HUMAN	Golgin subfamily A member 4 OS Homo sapiens GN GOLGA4 PE 1 SV 1	Regular	36.6719	46.05	262053	43	25	278	3.77	246203	48727	62290	12.0906	3.1684	Red
13282	P16885	PLCG2_HUMAN	1 phosphatidylinositol 4 5 bisphosphate phosphodiesterase gamma 2 OS Homo sapiens GN PLCG2 PE 1 SV 4	Regular	36.5607	46.13	149068	25	11	107	5.85	119730	54691	40911	13.5704	2.0229	Red
3368	O14967	CLGN_HUMAN	Calmegin OS Homo sapiens GN CLGN PE 1 SV 1	Regular	36.5418	46.11	70494.9	5	6	45	4.26	19296	7317	7654	1.8156	0.128	Red
2821	P49454	CENPF_HUMAN	Centromere protein F OS Homo sapiens GN CENPF PE 1 SV 2	Regular	36.4923	46.09	371073	53	32	346	2.34	404490	38821	104597	9.6326	3.5744	Red	618
16016	O94813	SLIT2_HUMAN	Slit homolog 2 protein OS Homo sapiens GN SLIT2 PE 1 SV 1	Regular	36.4562	46.06	175915	9	4	96	2.35	23925	16114	13400	3.9983	0.7034	Red
17038	Q9HCD6	TANC2_HUMAN	Protein TANC2 OS Homo sapiens GN TANC2 PE 1 SV 3	Regular	36.4426	46.04	221133	11	9	125	1.56	21543	3500	10185	0.8684	0.192	Red
279	Q8N0Z2	ABRA_HUMAN	Actin binding Rho activating protein OS Homo sapiens GN ABRA PE 2 SV 1	Regular	36.3851	46.1	43345.6	3	3	31	4.2	12839	4245	3694	1.0533	0.0457	Red
9720	P09848	LPH_HUMAN	Lactase phlorizin hydrolase OS Homo sapiens GN LCT PE 1 SV 3	Regular	36.343	46.07	219670	9	8	128	1.71	46867	18706	12841	4.6415	1.0196	Red
2105	O15484	CAN5_HUMAN	Calpain 5 OS Homo sapiens GN CAPN5 PE 1 SV 2	Regular	36.3252	46.1	74138.4	4	3	50	6.25	24230	24230	9277	6.0122	0.4457	Red
6119	Q14517	FAT1_HUMAN	Protocadherin Fat 1 OS Homo sapiens GN FAT1 PE 1 SV 2	Regular	36.195	46.15	509695	54	27	292	2.57	300145	8378	48413	2.0788	1.0596	Red	13581 6121
690	Q8TCU4	ALMS1_HUMAN	Alstrom syndrome protein 1 OS Homo sapiens GN ALMS1 PE 1 SV 3	Regular	36.1778	46.13	463360	45	29	329	2.76	254693	130554	79601	32.3942	15.0102	Red
8892	Q8NCM2	KCNH5_HUMAN	Potassium voltage gated channel subfamily H member 5 OS Homo sapiens GN KCNH5 PE 1 SV 3	Regular	36.0815	46.21	113017	13	9	61	3.24	151169	133678	25249	33.1693	3.7487	Red
7740	Q8NDA2	HMCN2_HUMAN	Hemicentin 2 OS Homo sapiens GN HMCN2 PE 2 SV 2	Regular	36.0522	46.21	550079	51	26	319	2.43	414796	65246	122094	16.1894	8.9054	Red
8376	Q9ULG1	INO80_HUMAN	DNA helicase INO80 OS Homo sapiens GN INO80 PE 1 SV 2	Regular	36.0507	46.19	177666	15	12	119	1.35	40273	3388.5	16156	0.8408	0.1494	Red
5115	Q9UFH2	DYH17_HUMAN	Dynein heavy chain 17 axonemal OS Homo sapiens GN DNAH17 PE 2 SV 2	Regular	36.0426	46.17	515609	69	27	374	1.2	138022	26607	99329	6.602	3.404	Red	5123
15852	Q92529	SHC3_HUMAN	SHC transforming protein 3 OS Homo sapiens GN SHC3 PE 1 SV 1	Regular	35.8426	46.17	64569.8	4	4	49	3.7	13907	3480	8197	0.8635	0.0558	Red
1854	Q9BXJ3	C1QT4_HUMAN	Complement C1q tumor necrosis factor related protein 4 OS Homo sapiens GN C1QTNF4 PE 1 SV 2	Regular	35.7436	46.18	35427.1	9	3	25	3.65	13176	22461	10201	5.5732	0.1974	Red
1576	Q86UU0	BCL9L_HUMAN	B cell CLL lymphoma 9 like protein OS Homo sapiens GN BCL9L PE 1 SV 1	Regular	35.6069	46.2	157529	7	5	64	4.54	36721	30014	9274	7.4473	1.1732	Red
15173	Q15413	RYR3_HUMAN	Ryanodine receptor 3 OS Homo sapiens GN RYR3 PE 1 SV 3	Regular	35.5488	46.18	558145	52	30	363	1.52	200582	24139	61050	5.9896	3.343	Red	15172 15171
10396	Q99707	METH_HUMAN	Methionine synthase OS Homo sapiens GN MTR PE 1 SV 2	Regular	35.5367	46.16	141839	16	11	109	3.48	179689	110730	31980	27.4753	3.8971	Red
18788	O15195	VILL_HUMAN	Villin like protein OS Homo sapiens GN VILL PE 2 SV 3	Regular	35.4871	46.14	96477.8	13	9	66	8.64	84761	21314	13566	5.2886	0.5102	Red
8617	Q13387	JIP2_HUMAN	C Jun amino terminal kinase interacting protein 2 OS Homo sapiens GN MAPK8IP2 PE 2 SV 2	Regular	35.4503	46.15	89400.7	2	2	38	4	4226	6339	5461	1.5729	0.1406	Red
18114	O15050	TRNK1_HUMAN	TPR and ankyrin repeat containing protein 1 OS Homo sapiens GN TRANK1 PE 2 SV 4	Regular	35.2569	46.27	340556	42	23	256	3.25	220525	61751	67769	15.3222	5.2181	Red
14563	Q9P2F6	RHG20_HUMAN	Rho GTPase activating protein 20 OS Homo sapiens GN ARHGAP20 PE 1 SV 2	Regular	35.1551	46.37	134148	9	7	93	4.7	24593	10558	14572	2.6197	0.3514	Red
17273	Q99973	TEP1_HUMAN	Telomerase protein component 1 OS Homo sapiens GN TEP1 PE 1 SV 2	Regular	35.0975	46.39	293684	25	17	182	2.44	97359	5672	24523	1.4074	0.4133	Red	8460 8643 36120
10857	Q9Y216	MTMR7_HUMAN	Myotubularin related protein 7 OS Homo sapiens GN MTMR7 PE 1 SV 3	Regular	35.0972	46.37	76802.3	4	6	56	1.97	133909	2355	7744	0.5843	0.0449	Red
13374	P54278	PMS2_HUMAN	Mismatch repair endonuclease PMS2 OS Homo sapiens GN PMS2 PE 1 SV 2	Regular	35.0391	46.35	96994.3	7	3	67	2.78	34311	17517	15451	4.3465	0.4216	Red
590	Q16352	AINX_HUMAN	Alpha internexin OS Homo sapiens GN INA PE 1 SV 2	Regular	35.0322	46.36	55561.8	17	9	50	8.02	93307	39764	29732	9.8666	0.5482	Red	26355 37247 4755 38110 8583 788 38490 11610 36249 13946 25351 8582
13216	P08F94	PKHD1_HUMAN	Fibrocystin OS Homo sapiens GN PKHD1 PE 1 SV 1	Regular	34.9245	46.38	452405	41	18	217	1.52	80823	19131	50728	4.7469	2.1475	Red
748	A2A2Z9	AN18B_HUMAN	Ankyrin repeat domain containing protein 18B OS Homo sapiens GN ANKRD18B PE 2 SV 1	Regular	34.8907	46.39	119200	20	10	116	3.76	41637	7487.95	15789	1.858	0.2215	Red	747
1664	P54132	BLM_HUMAN	Bloom syndrome protein OS Homo sapiens GN BLM PE 1 SV 1	Regular	34.7965	46.43	160712	24	9	121	4.45	48732	4047	21481	1.0042	0.1614	Red
16693	Q12768	STRUM_HUMAN	WASH complex subunit strumpellin OS Homo sapiens GN KIAA0196 PE 1 SV 1	Regular	34.7964	46.41	135199	6	5	98	1.47	37963	12606	8509	3.1279	0.4229	Red
19721	P15622	ZN250_HUMAN	Zinc finger protein 250 OS Homo sapiens GN ZNF250 PE 2 SV 3	Regular	34.7739	46.44	65292.8	2	2	38	5	2827	3993	1928	0.9908	0.0647	Red
17319	Q9UKN8	TF3C4_HUMAN	General transcription factor 3C polypeptide 4 OS Homo sapiens GN GTF3C4 PE 1 SV 2	Regular	34.7376	46.42	93294.1	11	5	73	0.97	10140	16131	9188	4.0026	0.3734	Red
747	Q8IVF6	AN18A_HUMAN	Ankyrin repeat domain containing protein 18A OS Homo sapiens GN ANKRD18A PE 1 SV 3	Regular	34.6315	46.47	116624	14	7	114	3.93	63234	33107.3	16957	8.2149	0.9581	Red	748
8751	Q3SY84	K2C71_HUMAN	Keratin type II cytoskeletal 71 OS Homo sapiens GN KRT71 PE 1 SV 3	Regular	34.4522	46.52	57804.9	8	8	45	4.21	37705	6702	10131	1.663	0.0961	Red
2812	Q9NYQ7	CELR3_HUMAN	Cadherin EGF LAG seven pass G type receptor 3 OS Homo sapiens GN CELSR3 PE 1 SV 2	Regular	34.4053	46.5	363090	37	20	226	4.62	180142	88281	55346	21.905	7.9535	Red
13678	Q70Z35	PREX2_HUMAN	Phosphatidylinositol 3 4 5 trisphosphate dependent Rac exchanger 2 protein OS Homo sapiens GN PREX2	Regular	34.3841	46.48	185246	28	10	118	3.18	66949	18426	34098	4.572	0.8469	Red
13390	Q9UL41	PNMA3_HUMAN	Paraneoplastic antigen Ma3 OS Homo sapiens GN PNMA3 PE 2 SV 2	Regular	34.2926	46.46	53031.6	9	3	38	2.38	53411	148923	14135	36.952	1.9596	Red
12052	O75147	OBSL1_HUMAN	Obscurin like protein 1 OS Homo sapiens GN OBSL1 PE 1 SV 4	Regular	34.2542	46.46	210026	20	12	135	2.32	484032	27383	156023	6.7945	1.427	Red
8691	Q9P260	K1468_HUMAN	LisH domain and HEAT repeat containing protein KIAA1468 OS Homo sapiens GN KIAA1468 PE 1 SV 2	Regular	34.2471	46.44	135542	23	9	104	0.82	48539	37065	20909	9.1969	1.2466	Red
12743	Q9Y5I2	PCDAA_HUMAN	Protocadherin alpha 10 OS Homo sapiens GN PCDHA10 PE 2 SV 1	Regular	34.2318	46.45	103674	5	2	58	2.11	40595	5655	28471	1.4032	0.1455	Red	12742 12736
2028	Q13634	CAD18_HUMAN	Cadherin 18 OS Homo sapiens GN CDH18 PE 2 SV 1	Regular	34.0348	46.49	88643.1	11	6	69	1.01	60728	16014	21721	3.9735	0.3522	Red
6004	Q6ZS17	FA65A_HUMAN	Protein FAM65A OS Homo sapiens GN FAM65A PE 1 SV 1	Regular	33.9919	46.47	133505	12	11	76	4.66	81145	37047	17159	9.1924	1.2272	Red
11357	P21359	NF1_HUMAN	Neurofibromin OS Homo sapiens GN NF1 PE 1 SV 2	Regular	33.904	46.55	322966	26	12	191	1.41	142753	32463	29105	8.055	2.6015	Red
5113	Q6ZR08	DYH12_HUMAN	Dynein heavy chain 12 axonemal OS Homo sapiens GN DNAH12 PE 1 SV 2	Regular	33.8919	46.55	360022	34	20	248	0.65	113710	6403.25	40102	1.5888	0.572	Red	2666 28254 15441 23044 32636 31365 1511 16071 13566
13127	Q9H5I5	PIEZ2_HUMAN	Piezo type mechanosensitive ion channel component 2 OS Homo sapiens GN PIEZO2 PE 2 SV 2	Regular	33.7561	46.62	320859	25	14	211	2.94	158964	13355	51250	3.3138	1.0632	Red
225	Q86UQ4	ABCAD_HUMAN	ATP binding cassette sub family A member 13 OS Homo sapiens GN ABCA13 PE 2 SV 3	Regular	33.7514	46.6	580894	39	20	352	1.66	250338	70633	47656	17.5261	10.1808	Red
4662	P15924	DESP_HUMAN	Desmoplakin OS Homo sapiens GN DSP PE 1 SV 3	Regular	33.6383	46.6	334227	39	28	266	1.88	192900	69242	44630	17.1809	5.7423	Red	5497
3370	P53675	CLH2_HUMAN	Clathrin heavy chain 2 OS Homo sapiens GN CLTCL1 PE 1 SV 2	Regular	33.6041	46.61	189140	19	9	133	3.29	63266	25538.7	18278	6.3369	1.1986	Red	3369
2771	Q5VT06	CE350_HUMAN	Centrosome associated protein 350 OS Homo sapiens GN CEP350 PE 1 SV 1	Regular	33.504	46.66	352527	44	24	278	1.64	224567	48428	55031	12.0164	4.2361	Red
15977	Q5T5P2	SKT_HUMAN	Sickle tail protein homolog OS Homo sapiens GN SKT PE 1 SV 2	Regular	33.4686	46.66	214743	22	17	160	1.6	121844	34203	33264	8.4867	1.8225	Red
14823	Q9NWF9	RN216_HUMAN	E3 ubiquitin protein ligase RNF216 OS Homo sapiens GN RNF216 PE 1 SV 3	Regular	33.3841	46.66	101231	8	4	62	1.85	10423	20844	5411	5.172	0.5236	Red
9682	Q6ZMQ8	LMTK1_HUMAN	Serine threonine protein kinase LMTK1 OS Homo sapiens GN AATK PE 1 SV 2	Regular	33.3709	46.64	146337	9	5	69	1.53	19071	18129	10976	4.4983	0.6583	Red
8582	Q14643	ITPR1_HUMAN	Inositol 1 4 5 trisphosphate receptor type 1 OS Homo sapiens GN ITPR1 PE 1 SV 2	Regular	33.2653	46.67	317367	33	20	238	3.12	202943	38205	34815	9.4797	3.0086	Red	590 26355 37247 4755 8584 38110 8583 788 38490 11610 36249 13946 25351
13436	Q9Y253	POLH_HUMAN	DNA polymerase eta OS Homo sapiens GN POLH PE 1 SV 1	Regular	33.2085	46.65	79383	2	3	45	4.63	12258	12334.5	3540	3.0605	0.243	Red
1585	Q8NFC6	BD1L1_HUMAN	Biorientation of chromosomes in cell division protein 1 like 1 OS Homo sapiens GN BOD1L1 PE 1 SV 2	Regular	33.1978	46.63	332634	28	15	232	2.39	885542	80659	84450	20.0138	6.6573	Red
13657	Q9HAZ2	PRD16_HUMAN	PR domain zinc finger protein 16 OS Homo sapiens GN PRDM16 PE 1 SV 3	Regular	33.1328	46.61	142362	9	6	83	2.98	14409	3351.63	11242	0.8316	0.1184	Red	5618
13110	Q9UBF8	PI4KB_HUMAN	Phosphatidylinositol 4 kinase beta OS Homo sapiens GN PI4KB PE 1 SV 1	Regular	33.0635	46.59	92120.4	10	6	60	2.57	91198	43222.5	14515	10.7247	0.988	Red
16347	Q6Q759	SPG17_HUMAN	Sperm associated antigen 17 OS Homo sapiens GN SPAG17 PE 1 SV 1	Regular	33.0319	46.57	252940	22	16	179	2.92	60455	6316	24909	1.5672	0.3964	Red
3593	P12111	CO6A3_HUMAN	Collagen alpha 3 VI chain OS Homo sapiens GN COL6A3 PE 1 SV 5	Regular	33.0021	46.57	345381	42	23	237	1.83	390083	12643.6	75269	3.1372	1.0835	Red	5616
19523	Q86VM9	ZCH18_HUMAN	Zinc finger CCCH domain containing protein 18 OS Homo sapiens GN ZC3H18 PE 1 SV 2	Regular	32.9125	46.57	106607	7	5	141	4.51	37699	6507	4207	1.6146	0.1721	Red
13581	Q5VV67	PPRC1_HUMAN	Peroxisome proliferator activated receptor gamma coactivator related protein 1 OS Homo sapiens GN PP	Regular	32.7143	46.6	179027	12	10	92	3.43	67531	24414	21292	6.0578	1.0845	Red	6119 6121
4824	Q9UGM3	DMBT1_HUMAN	Deleted in malignant brain tumors 1 protein OS Homo sapiens GN DMBT1 PE 1 SV 2	Regular	32.6608	46.62	268206	8	5	89	1.82	39264	26654	13307	6.6136	1.7738	Red
474	Q8N7X0	ADGB_HUMAN	Androglobin OS Homo sapiens GN ADGB PE 2 SV 3	Regular	32.6032	46.6	190797	31	17	172	2.94	88749	18703	47709	4.6407	0.8854	Red
19076	Q6AWC2	WWC2_HUMAN	Protein WWC2 OS Homo sapiens GN WWC2 PE 1 SV 2	Regular	32.598	46.59	134918	19	12	98	4.03	122661	17302	30190	4.2931	0.5792	Red
12905	Q29RF7	PDS5A_HUMAN	Sister chromatid cohesion protein PDS5 homolog A OS Homo sapiens GN PDS5A PE 1 SV 1	Regular	32.5349	46.61	152370	9	7	112	3.14	26704	14301	13861	3.5485	0.5407	Red
20183	Q9UDY2	ZO2_HUMAN	Tight junction protein ZO 2 OS Homo sapiens GN TJP2 PE 1 SV 2	Regular	32.3683	46.61	134186	14	9	105	3.78	91989	33418	32440	8.292	1.1127	Red
11141	Q6ZS30	NBEL1_HUMAN	Neurobeachin like protein 1 OS Homo sapiens GN NBEAL1 PE 2 SV 3	Regular	32.3589	46.59	310431	26	12	187	1.82	55588	31374	21912	7.7848	2.4166	Red
6211	Q9Y6R7	FCGBP_HUMAN	IgGFc binding protein OS Homo sapiens GN FCGBP PE 1 SV 3	Regular	32.3368	46.62	596824	26	10	249	1.2	272927	232437	55694	57.6742	34.4214	Red
5907	Q6ZUB1	F75E1_HUMAN	Protein FAM75E1 OS Homo sapiens GN FAM75E1 PE 2 SV 2	Regular	32.2359	46.62	158961	19	10	107	3.67	116980	66175	34903	16.4199	2.6101	Red
5818	P81408	F189B_HUMAN	Protein FAM189B OS Homo sapiens GN FAM189B PE 1 SV 2	Regular	32.2143	46.6	73008.9	3	2	38	3.29	5897	6723	3660	1.6682	0.1218	Red
8186	Q9NWB7	IFT57_HUMAN	Intraflagellar transport protein 57 homolog OS Homo sapiens GN IFT57 PE 1 SV 1	Regular	32.1829	46.61	49279.5	9	5	30	3.03	28121	10422	10713	2.586	0.1274	Red
6047	P00451	FA8_HUMAN	Coagulation factor VIII OS Homo sapiens GN F8 PE 1 SV 1	Regular	32.0271	46.72	268493	19	12	188	1.53	86513	15582	28516	3.8663	1.0381	Red
2113	O75155	CAND2_HUMAN	Cullin associated NEDD8 dissociated protein 2 OS Homo sapiens GN CAND2 PE 1 SV 3	Regular	32.0252	46.7	136739	16	11	88	5.5	76923	22382	21334	5.5536	0.7594	Red	38490 1224 30066 34809 34165 23771
6121	Q8TDW7	FAT3_HUMAN	Protocadherin Fat 3 OS Homo sapiens GN FAT3 PE 2 SV 2	Regular	31.7905	46.86	509002	41	25	293	2.53	232544	86837	61585	21.5467	10.9673	Red	13581 6119
11001	Q6PIF6	MYO7B_HUMAN	Unconventional myosin VIIb OS Homo sapiens GN MYO7B PE 2 SV 2	Regular	31.6898	46.84	243767	31	19	172	3.07	70357	19834	30680	4.9214	1.1997	Red
13942	Q92932	PTPR2_HUMAN	Receptor type tyrosine protein phosphatase N2 OS Homo sapiens GN PTPRN2 PE 1 SV 2	Regular	31.6646	46.82	112070	18	8	75	1.18	84242	15756	24467	3.9095	0.4381	Red
3692	Q8IZC6	CORA1_HUMAN	Collagen alpha 1 XXVII chain OS Homo sapiens GN COL27A1 PE 1 SV 1	Regular	31.5489	46.8	187748	17	12	114	1.99	61531	28920	30427	7.1759	1.3473	Red
5141	O75923	DYSF_HUMAN	Dysferlin OS Homo sapiens GN DYSF PE 1 SV 1	Regular	31.4741	46.8	239405	40	14	151	3.41	88109	26919	32561	6.6794	1.5991	Red
13322	O00469	PLOD2_HUMAN	Procollagen lysine 2 oxoglutarate 5 dioxygenase 2 OS Homo sapiens GN PLOD2 PE 1 SV 2	Regular	31.4539	46.78	85427.1	8	4	59	2.99	19370	5188.5	18377	1.2874	0.11	Red
4738	Q8IY37	DHX37_HUMAN	Probable ATP dependent RNA helicase DHX37 OS Homo sapiens GN DHX37 PE 1 SV 1	Regular	31.402	46.76	130629	12	7	81	0.95	36325	11778	25051	2.9225	0.3818	Red
9043	Q9HAQ2	KIF9_HUMAN	Kinesin like protein KIF9 OS Homo sapiens GN KIF9 PE 1 SV 4	Regular	31.3647	46.74	90328.8	18	7	80	4.56	80778	11785	27721	2.9242	0.2641	Red
16043	Q9UPU9	SMAG1_HUMAN	Protein Smaug homolog 1 OS Homo sapiens GN SAMD4A PE 1 SV 3	Regular	31.3176	46.79	80099.1	9	5	49	2.51	20664	5379	6193	1.3347	0.1069	Red	2292
11287	O76041	NEBL_HUMAN	Nebulette OS Homo sapiens GN NEBL PE 1 SV 1	Regular	31.1941	46.82	116682	13	9	102	2.56	30282	15027	10504	3.7286	0.4351	Red	22243
4856	Q96M86	DNHD1_HUMAN	Dynein heavy chain domain containing protein 1 OS Homo sapiens GN DNHD1 PE 1 SV 2	Regular	31.1279	46.8	539804	32	18	288	1.73	128638	37369	30685	9.2723	5.0052	Red
17088	Q9P2M4	TBC14_HUMAN	TBC1 domain family member 14 OS Homo sapiens GN TBC1D14 PE 1 SV 3	Regular	31.0872	46.78	78878.5	11	5	46	4.04	130095	175986	30765	43.6671	3.4444	Red
2341	Q6ZRS4	CC129_HUMAN	Coiled coil domain containing protein 129 OS Homo sapiens GN CCDC129 PE 2 SV 2	Regular	31.0427	46.8	117285	4	2	76	1.44	6608	9135	5874	2.2667	0.2658	Red
3442	Q6PJG2	CN043_HUMAN	Uncharacterized protein C14orf43 OS Homo sapiens GN C14orf43 PE 1 SV 2	Regular	31.0206	46.8	115502	5	3	87	0.86	31492	4167	4578	1.034	0.1194	Red
11610	Q7Z494	NPHP3_HUMAN	Nephrocystin 3 OS Homo sapiens GN NPHP3 PE 1 SV 1	Regular	30.9763	46.83	152062	20	14	103	5.71	102001	11897	20672	2.952	0.4489	Red	590 26355 37247 4755 38110 8583 788 38490 36249 13946 25351 8582
11132	Q8IVL1	NAV2_HUMAN	Neuron navigator 2 OS Homo sapiens GN NAV2 PE 1 SV 3	Regular	30.942	46.85	269479	20	15	173	0.92	158275	13794	32105	3.4227	0.9223	Red	17265 11133 18260
838	Q8TF21	ANR24_HUMAN	Ankyrin repeat domain containing protein 24 OS Homo sapiens GN ANKRD24 PE 2 SV 2	Regular	30.8729	46.88	125156	16	10	114	5.67	62425	28158	13711	6.9868	0.8744	Red
15931	Q9Y2K2	SIK3_HUMAN	Serine threonine protein kinase SIK3 OS Homo sapiens GN SIK3 PE 1 SV 3	Regular	30.8681	46.86	141235	11	6	72	2.93	17082	4219.5	12369	1.047	0.1479	Red
9017	P52732	KIF11_HUMAN	Kinesin like protein KIF11 OS Homo sapiens GN KIF11 PE 1 SV 2	Regular	30.753	46.88	120186	29	11	94	2.37	202180	5341.5	74957	1.3254	0.1593	Red
5233	O00418	EF2K_HUMAN	Eukaryotic elongation factor 2 kinase OS Homo sapiens GN EEF2K PE 1 SV 2	Regular	30.7311	46.86	82714.6	8	6	64	3.45	19019	5892	11238	1.462	0.1209	Red
10061	O60336	MABP1_HUMAN	Mitogen activated protein kinase binding protein 1 OS Homo sapiens GN MAPKBP1 PE 2 SV 4	Regular	30.5588	46.93	165643	23	12	92	3.17	44289	9174	22587	2.2763	0.3771	Red
1245	Q76L83	ASXL2_HUMAN	Putative Polycomb group protein ASXL2 OS Homo sapiens GN ASXL2 PE 1 SV 1	Regular	30.4863	46.93	155132	14	10	114	2.37	38399	14781	20101	3.6676	0.569	Red
18773	P35968	VGFR2_HUMAN	Vascular endothelial growth factor receptor 2 OS Homo sapiens GN KDR PE 1 SV 2	Regular	30.1662	47.04	153409	15	7	99	2.21	44194	49528.5	29597	12.2894	1.8853	Red
2032	Q9H251	CAD23_HUMAN	Cadherin 23 OS Homo sapiens GN CDH23 PE 1 SV 1	Regular	30.0358	47.11	370324	24	14	203	3.04	86222	26286	29621	6.5223	2.4154	Red
9449	O95835	LATS1_HUMAN	Serine threonine protein kinase LATS1 OS Homo sapiens GN LATS1 PE 1 SV 1	Regular	29.9974	47.11	127383	6	5	79	0.88	24712	52947	6476	13.1377	1.6735	Red
2352	Q8IYE0	CC146_HUMAN	Coiled coil domain containing protein 146 OS Homo sapiens GN CCDC146 PE 2 SV 2	Regular	29.9567	47.09	113206	8	6	124	1.36	117032	53773.5	17798	13.3427	1.5105	Red	31224
13949	P23470	PTPRG_HUMAN	Receptor type tyrosine protein phosphatase gamma OS Homo sapiens GN PTPRG PE 1 SV 4	Regular	29.8456	47.1	163144	13	5	108	3.53	30924	15561	9848	3.8611	0.6299	Red
12955	O15534	PER1_HUMAN	Period circadian protein homolog 1 OS Homo sapiens GN PER1 PE 1 SV 2	Regular	29.8175	47.08	137752	6	4	70	1.63	23870	30813	4323	7.6456	1.0532	Red
18171	Q9NRE2	TSH2_HUMAN	Teashirt homolog 2 OS Homo sapiens GN TSHZ2 PE 1 SV 3	Regular	29.8116	47.06	116374	11	9	85	5.13	60213	7419.1	17209	1.8409	0.2142	Red	18170
2374	Q8IYT3	CC170_HUMAN	Coiled coil domain containing protein 170 OS Homo sapiens GN CCDC170 PE 2 SV 3	Regular	29.6995	47.08	82904.2	17	11	84	3.92	61390	15323	21871	3.8021	0.3152	Red	36524
16110	Q6IEE8	SN12L_HUMAN	Schlafen family member 12 like OS Homo sapiens GN SLFN12L PE 2 SV 3	Regular	29.5811	47.15	71708.9	14	6	53	3.71	30614	8461.5	17679	2.0995	0.1506	Red
14136	Q9H5N1	RABE2_HUMAN	Rab GTPase binding effector protein 2 OS Homo sapiens GN RABEP2 PE 1 SV 2	Regular	29.5621	47.13	63999.1	6	5	59	0.88	42453	17163	20488	4.2586	0.2725	Red
948	P25054	APC_HUMAN	Adenomatous polyposis coli protein OS Homo sapiens GN APC PE 1 SV 2	Regular	29.552	47.11	313813	36	24	233	2.22	139639	6233	57625	1.5466	0.4853	Red	8995
10271	Q9UJA3	MCM8_HUMAN	DNA replication licensing factor MCM8 OS Homo sapiens GN MCM8 PE 1 SV 2	Regular	29.3788	47.13	94552.3	7	5	65	2.62	18395	12192	10568	3.0252	0.286	Red	21443 39279 13299
7830	Q6MZM0	HPHL1_HUMAN	Hephaestin like protein 1 OS Homo sapiens GN HEPHL1 PE 2 SV 2	Regular	29.2555	47.26	132629	18	10	86	1.98	65460	36558	21503	9.0711	1.2031	Red
18631	Q70J99	UN13D_HUMAN	Protein unc 13 homolog D OS Homo sapiens GN UNC13D PE 1 SV 1	Regular	29.235	47.25	124366	12	6	80	2.94	25698	12208	9888	3.0292	0.3767	Red
13184	Q7Z3Z4	PIWL4_HUMAN	Piwi like protein 4 OS Homo sapiens GN PIWIL4 PE 2 SV 2	Regular	29.2311	47.23	97900.3	12	11	67	2.23	126565	8274	18989	2.053	0.201	Red
10178	Q7KZI7	MARK2_HUMAN	Serine threonine protein kinase MARK2 OS Homo sapiens GN MARK2 PE 1 SV 2	Regular	29.182	47.23	88310.1	11	6	68	2.79	27503	14104.5	9431	3.4997	0.3091	Red
6595	Q9Y2I7	FYV1_HUMAN	1 phosphatidylinositol 3 phosphate 5 kinase OS Homo sapiens GN PIKFYVE PE 1 SV 3	Regular	29.0272	47.32	239760	22	12	176	2.29	74520	40366	39575	10.016	2.4014	Red
7295	Q9C091	GRB1L_HUMAN	GREB1 like protein OS Homo sapiens GN GREB1L PE 2 SV 2	Regular	28.9685	47.32	216636	33	13	126	2.86	81184	14576	44566	3.6167	0.7835	Red	7302
5111	Q8IVF4	DYH10_HUMAN	Dynein heavy chain 10 axonemal OS Homo sapiens GN DNAH10 PE 1 SV 4	Regular	28.89	47.36	518035	64	35	370	2.75	259463	44687	59834	11.0881	5.744	Red
6095	Q9C0B6	FAM5B_HUMAN	Protein FAM5B OS Homo sapiens GN FAM5B PE 2 SV 2	Regular	28.8834	47.34	90430.5	13	6	46	3.58	100999	4642.5	16828	1.1519	0.1042	Red
13464	Q6S5H5	POTEG_HUMAN	POTE ankyrin domain family member G OS Homo sapiens GN POTEG PE 2 SV 5	Regular	28.8523	47.35	58066	6	3	36	1.77	20818	2415	6054	0.5992	0.0348	Red
8646	Q92628	K0232_HUMAN	Uncharacterized protein KIAA0232 OS Homo sapiens GN KIAA0232 PE 1 SV 5	Regular	28.8142	47.33	157127	11	8	77	3.87	50101	30926	14897	7.6736	1.2057	Red
2769	Q8TEP8	CE192_HUMAN	Centrosomal protein of 192 kDa OS Homo sapiens GN CEP192 PE 1 SV 2	Regular	28.786	47.31	215313	22	16	124	4.33	199893	136621	35487	33.8996	7.299	Red
19840	Q5JVG2	ZN484_HUMAN	Zinc finger protein 484 OS Homo sapiens GN ZNF484 PE 1 SV 1	Regular	28.7596	47.29	101016	11	8	64	7.28	40449	9515	10661	2.3609	0.2385	Red	32967
8665	Q8NCT3	K0895_HUMAN	Uncharacterized protein KIAA0895 OS Homo sapiens GN KIAA0895 PE 2 SV 4	Regular	28.7438	47.27	61038	4	3	50	3.27	13120	5652	3561	1.4024	0.0856	Red
8993	O75037	KI21B_HUMAN	Kinesin like protein KIF21B OS Homo sapiens GN KIF21B PE 1 SV 2	Regular	28.6911	47.25	184430	16	9	134	0.61	53120	48732	16013	12.0918	2.2301	Red
7169	Q6PRD1	GP179_HUMAN	Probable G protein coupled receptor 179 OS Homo sapiens GN GPR179 PE 1 SV 2	Regular	28.6432	47.27	260785	32	15	173	1.99	272731	27415	44673	6.8024	1.774	Red
16224	P18583	SON_HUMAN	Protein SON OS Homo sapiens GN SON PE 1 SV 4	Regular	28.5096	47.28	264230	15	8	123	0.58	21569	12282	21552	3.0475	0.8052	Red
9072	Q5VTJ3	KLD7A_HUMAN	Kelch domain containing protein 7A OS Homo sapiens GN KLHDC7A PE 1 SV 5	Regular	28.4336	47.32	85848.2	8	6	54	2.19	19587	7056	5709	1.7508	0.1503	Red
14639	P57078	RIPK4_HUMAN	Receptor interacting serine threonine protein kinase 4 OS Homo sapiens GN RIPK4 PE 1 SV 1	Regular	28.4113	47.32	92352.3	8	6	64	2.76	29188	6400.5	11863	1.5881	0.1467	Red
5123	Q9NYC9	DYH9_HUMAN	Dynein heavy chain 9 axonemal OS Homo sapiens GN DNAH9 PE 1 SV 3	Regular	28.3202	47.3	515927	51	26	367	1.16	409687	288624	120313	71.6158	36.9485	Red	5112 5115
5117	Q9P225	DYH2_HUMAN	Dynein heavy chain 2 axonemal OS Homo sapiens GN DNAH2 PE 1 SV 3	Regular	28.2471	47.31	511121	38	21	364	1.2	128550	19878	54959	4.9323	2.521	Red
16764	Q4LDE5	SVEP1_HUMAN	Sushi von Willebrand factor type A EGF and pentraxin domain containing protein 1 OS Homo sapiens G	Regular	28.0552	47.35	404941	41	20	217	1.82	180895	45161	54647	11.2057	4.5377	Red
862	A6NC57	ANR62_HUMAN	Ankyrin repeat domain containing protein 62 OS Homo sapiens GN ANKRD62 PE 2 SV 4	Regular	27.8642	47.41	107758	14	10	99	3.16	92324	37928	26282	9.411	1.0141	Red
8038	Q9NRM6	I17RB_HUMAN	Interleukin 17 receptor B OS Homo sapiens GN IL17RB PE 1 SV 2	Regular	27.8625	47.4	57139.2	4	3	36	6.37	9672	12780	6782	3.1711	0.1812	Red
13279	Q9P212	PLCE1_HUMAN	1 phosphatidylinositol 4 5 bisphosphate phosphodiesterase epsilon 1 OS Homo sapiens GN PLCE1 PE 1 SV	Regular	27.8457	47.38	261909	19	13	164	1.52	79961	8036	27057	1.994	0.5222	Red
16625	Q9P2P6	STAR9_HUMAN	StAR related lipid transfer protein 9 OS Homo sapiens GN STARD9 PE 1 SV 3	Regular	27.7801	47.4	522161	31	18	377	1.57	204198	38979	49266	9.6718	5.0502	Red
11191	O60721	NCKX1_HUMAN	Sodium potassium calcium exchanger 1 OS Homo sapiens GN SLC24A1 PE 1 SV 1	Regular	27.6756	47.4	121774	11	5	65	0.64	112506	19011	23930	4.7172	0.5744	Red
19728	O14978	ZN263_HUMAN	Zinc finger protein 263 OS Homo sapiens GN ZNF263 PE 2 SV 2	Regular	27.6182	47.42	78895.6	6	3	54	3.07	8400	14091	5146	3.4964	0.2758	Red
10175	Q8NA82	MARHA_HUMAN	Probable E3 ubiquitin protein ligase MARCH10 OS Homo sapiens GN MARCH10 PE 1 SV 3	Regular	27.5109	47.47	91366.5	8	5	58	2.23	31056	53415	16521	13.2538	1.211	Red
6830	Q5U4N7	GDF5O_HUMAN	Protein GDF5OS mitochondrial OS Homo sapiens GN GDF5OS PE 1 SV 2	Regular	27.4668	47.45	28439.4	8	3	22	3.6	27216	51612	7649	12.8064	0.3642	Red
5618	Q03112	EVI1_HUMAN	MDS1 and EVI1 complex locus protein EVI1 OS Homo sapiens GN MECOM PE 1 SV 2	Regular	27.4254	47.45	119759	10	5	74	3.04	11096	8211.37	9004	2.0375	0.244	Red	13657
18524	Q9H9J4	UBP42_HUMAN	Ubiquitin carboxyl terminal hydrolase 42 OS Homo sapiens GN USP42 PE 1 SV 3	Regular	27.413	47.45	146875	9	5	91	2.11	88836	74023.5	7832	18.3673	2.6977	Red
6703	Q14C86	GAPD1_HUMAN	GTPase activating protein and VPS9 domain containing protein 1 OS Homo sapiens GN GAPVD1 PE 1 SV 2	Regular	27.3791	47.43	166463	20	8	104	2.37	84235	16603	48673	4.1197	0.6858	Red
17783	Q6ZXV5	TMTC3_HUMAN	Transmembrane and TPR repeat containing protein 3 OS Homo sapiens GN TMTC3 PE 1 SV 2	Regular	27.3402	47.44	104921	20	11	68	1.75	89006	15610.5	35858	3.8734	0.4064	Red
19505	O60293	ZC3H1_HUMAN	Zinc finger C3H1 domain containing protein OS Homo sapiens GN ZFC3H1 PE 1 SV 3	Regular	27.175	47.52	228295	20	16	147	4.07	147963	73915	41337	18.3404	4.187	Red
13644	P48634	PRC2A_HUMAN	Protein PRRC2A OS Homo sapiens GN PRRC2A PE 1 SV 3	Regular	27.1004	47.5	229320	27	12	161	1.02	95170	14787	28866	3.6691	0.8414	Red
10560	Q9UMN6	MLL4_HUMAN	Histone lysine N methyltransferase MLL4 OS Homo sapiens GN WBP7 PE 1 SV 1	Regular	27.0475	47.48	297849	34	18	193	2.39	90969	7988	38995	1.9821	0.5904	Red
13437	Q9UNA4	POLI_HUMAN	DNA polymerase iota OS Homo sapiens GN POLI PE 1 SV 3	Regular	27.0133	47.49	83804.5	19	7	76	1.08	172794	253992	36684	63.0227	5.2816	Red
8443	Q15051	IQCB1_HUMAN	IQ calmodulin binding motif containing protein 1 OS Homo sapiens GN IQCB1 PE 1 SV 1	Regular	26.9554	47.53	69385.5	6	5	46	2.68	19022	18958.5	10480	4.7041	0.3264	Red
10020	Q13233	M3K1_HUMAN	Mitogen activated protein kinase kinase kinase 1 OS Homo sapiens GN MAP3K1 PE 1 SV 4	Regular	26.7743	47.57	166523	13	9	99	3.04	99086	49346	22051	12.2442	2.0389	Red
5222	Q3B7T1	EDRF1_HUMAN	Erythroid differentiation related factor 1 OS Homo sapiens GN EDRF1 PE 1 SV 1	Regular	26.5895	47.59	139897	24	13	96	4.04	72260	5890	26161	1.4615	0.2045	Red
19040	Q5T9L3	WLS_HUMAN	Protein wntless homolog OS Homo sapiens GN WLS PE 1 SV 2	Regular	26.542	47.57	62937.7	7	4	36	1.48	22739	8310	8627	2.0619	0.1298	Red
19607	O95405	ZFYV9_HUMAN	Zinc finger FYVE domain containing protein 9 OS Homo sapiens GN ZFYVE9 PE 1 SV 2	Regular	26.4083	47.58	159026	8	7	91	2.53	52797	45687	29164	11.3363	1.8028	Red
2661	O75419	CDC45_HUMAN	Cell division control protein 45 homolog OS Homo sapiens GN CDC45 PE 1 SV 1	Regular	26.3025	47.6	66253.1	13	6	44	1.94	32661	3111	25258	0.7719	0.0511	Red
1302	Q9ULI0	ATD2B_HUMAN	ATPase family AAA domain containing protein 2B OS Homo sapiens GN ATAD2B PE 1 SV 3	Regular	26.2789	47.58	166454	16	6	116	2.4	97880	48529.5	16785	12.0416	2.0044	Red
7618	Q5T447	HECD3_HUMAN	E3 ubiquitin protein ligase HECTD3 OS Homo sapiens GN HECTD3 PE 1 SV 1	Regular	25.9814	47.68	98196.6	12	7	72	4.65	48246	5108	16205	1.2674	0.1245	Red	10632
12614	Q9ULE6	PALD_HUMAN	Paladin OS Homo sapiens GN PALD PE 1 SV 3	Regular	25.9743	47.66	97610	14	7	88	1.75	55371	4275	13865	1.0607	0.1035	Red
9427	Q96RT1	LAP2_HUMAN	Protein LAP2 OS Homo sapiens GN ERBB2IP PE 1 SV 2	Regular	25.9509	47.65	159040	11	7	115	0.92	36217	28806	14833	7.1476	1.1368	Red
9830	Q9NZR2	LRP1B_HUMAN	Low density lipoprotein receptor related protein 1B OS Homo sapiens GN LRP1B PE 1 SV 2	Regular	25.8365	47.69	535173	22	15	302	1.61	108966	26690	33992	6.6226	3.5442	Red
4755	Q9BTC0	DIDO1_HUMAN	Death inducer obliterator 1 OS Homo sapiens GN DIDO1 PE 1 SV 5	Regular	25.6679	47.67	245584	20	12	192	1.96	63877	13918	33547	3.4535	0.8481	Red	590 26355 37247 38110 8583 788 38490 11610 36249 13946 25351 8582
12742	Q9Y5H5	PCDA9_HUMAN	Protocadherin alpha 9 OS Homo sapiens GN PCDHA9 PE 2 SV 1	Regular	25.6081	47.65	103030	6	2	61	1.37	42967	12771	31224	3.1688	0.3265	Red	12736 12743
5152	Q9P2K8	E2AK4_HUMAN	Eukaryotic translation initiation factor 2 alpha kinase 4 OS Homo sapiens GN EIF2AK4 PE 1 SV 3	Regular	25.5634	47.63	188394	18	12	125	1.21	87912	41242.5	25833	10.2334	1.9279	Red
1745	O75150	BRE1B_HUMAN	E3 ubiquitin protein ligase BRE1B OS Homo sapiens GN RNF40 PE 1 SV 4	Regular	25.5114	47.62	114392	5	6	97	4	48460	30186	8900	7.49	0.8568	Red
13009	P98160	PGBM_HUMAN	Basement membrane specific heparan sulfate proteoglycan core protein OS Homo sapiens GN HSPG2 PE 1 S	Regular	25.4594	47.6	479552	33	20	260	1.41	159458	42068	32540	10.4383	5.0057	Red
18260	Q96AY4	TTC28_HUMAN	Tetratricopeptide repeat protein 28 OS Homo sapiens GN TTC28 PE 1 SV 4	Regular	25.43	47.6	272824	32	16	169	1.01	193694	16927.5	49489	4.2002	1.1459	Red	17265 11132
284	Q13085	ACACA_HUMAN	Acetyl CoA carboxylase 1 OS Homo sapiens GN ACACA PE 1 SV 2	Regular	25.2765	47.6	267265	21	10	180	2.39	126902	64243.2	29645	15.9406	4.2604	Red	285
2144	Q8NG31	CASC5_HUMAN	Protein CASC5 OS Homo sapiens GN CASC5 PE 1 SV 3	Regular	25.261	47.58	268357	22	13	199	2.39	66244	31410	30024	7.7937	2.0915	Red
6066	Q9BXW9	FACD2_HUMAN	Fanconi anemia group D2 protein OS Homo sapiens GN FANCD2 PE 1 SV 1	Regular	25.2323	47.58	168401	7	6	104	2.24	58050	29409	13737	7.2972	1.2289	Red
11589	O60287	NPA1P_HUMAN	Nucleolar pre ribosomal associated protein 1 OS Homo sapiens GN URB1 PE 1 SV 4	Regular	25.0204	47.63	256671	12	9	175	1.98	22623	8851	17104	2.1962	0.5637	Red
17048	Q13395	TARB1_HUMAN	Probable methyltransferase TARBP1 OS Homo sapiens GN TARBP1 PE 1 SV 1	Regular	25.0122	47.61	183956	21	13	112	3.27	48574	8530	25322	2.1165	0.3893	Red
8397	Q8N201	INT1_HUMAN	Integrator complex subunit 1 OS Homo sapiens GN INTS1 PE 1 SV 2	Regular	24.9619	47.65	246522	26	15	170	1.83	246137	4139	18883	1.027	0.2532	Red
13189	Q8TDX9	PK1L1_HUMAN	Polycystic kidney disease protein 1 like 1 OS Homo sapiens GN PKD1L1 PE 2 SV 1	Regular	24.9592	47.63	319655	10	9	176	1.4	35691	17321	20041	4.2978	1.3738	Red
1874	Q6P1N0	C2D1A_HUMAN	Coiled coil and C2 domain containing protein 1A OS Homo sapiens GN CC2D1A PE 1 SV 1	Regular	24.8666	47.63	104462	11	8	70	3.47	65849	31853	9424	7.9036	0.8256	Red
6485	Q5SZK8	FREM2_HUMAN	FRAS1 related extracellular matrix protein 2 OS Homo sapiens GN FREM2 PE 1 SV 2	Regular	24.8574	47.62	352811	44	20	197	1.23	204453	23268	67716	5.7735	2.0369	Red
942	O95996	APC2_HUMAN	Adenomatous polyposis coli protein 2 OS Homo sapiens GN APC2 PE 1 SV 1	Regular	24.8133	47.62	246116	30	18	203	3.34	125310	18713	32351	4.6432	1.1428	Red
10557	Q03164	MLL1_HUMAN	Histone lysine N methyltransferase MLL OS Homo sapiens GN MLL PE 1 SV 5	Regular	24.7484	47.64	436327	41	21	260	1.26	124782	23119	49110	5.7365	2.503	Red
5999	P12259	FA5_HUMAN	Coagulation factor V OS Homo sapiens GN F5 PE 1 SV 4	Regular	24.7212	47.62	252844	20	10	130	1.12	49594	8241	18413	2.0448	0.517	Red
16071	Q6ZMV5	SMEK3_HUMAN	Putative SMEK homolog 3 OS Homo sapiens GN SMEK3P PE 5 SV 2	Regular	24.6743	47.62	96916.4	12	4	71	2.64	18737	2292.38	8040	0.5688	0.0551	Red	2666 5113 28254 15441 23044 32636 31365 1511 13566
7404	Q9UHL9	GT2D1_HUMAN	General transcription factor II I repeat domain containing protein 1 OS Homo sapiens GN GTF2IRD1 PE	Regular	24.6645	47.6	106970	10	6	91	1.46	74795	87247.5	6210	21.6486	2.3157	Red
8710	Q8N8K9	K1958_HUMAN	Uncharacterized protein KIAA1958 OS Homo sapiens GN KIAA1958 PE 1 SV 1	Regular	24.5776	47.59	80466.9	8	5	46	3.35	10506	5538	7489	1.3741	0.1106	Red
8657	O60303	K0556_HUMAN	Uncharacterized protein KIAA0556 OS Homo sapiens GN KIAA0556 PE 1 SV 4	Regular	24.5757	47.57	182058	13	9	125	2.22	33055	11410	15592	2.8311	0.5154	Red
11380	Q00653	NFKB2_HUMAN	Nuclear factor NF kappa B p100 subunit OS Homo sapiens GN NFKB2 PE 1 SV 4	Regular	24.5463	47.57	97433.6	15	6	56	3.78	39193	7747.5	16838	1.9224	0.1873	Red
13739	Q6P2Q9	PRP8_HUMAN	Pre mRNA processing splicing factor 8 OS Homo sapiens GN PRPF8 PE 1 SV 2	Regular	24.5226	47.57	274913	24	15	180	2.23	50316	15772	31006	3.9135	1.0759	Red
16198	Q9UIG8	SO3A1_HUMAN	Solute carrier organic anion transporter family member 3A1 OS Homo sapiens GN SLCO3A1 PE 1 SV 3	Regular	24.4918	47.55	78435	2	2	34	3.8	5023	7534.5	2638	1.8695	0.1466	Red
2726	Q9H211	CDT1_HUMAN	DNA replication factor Cdt1 OS Homo sapiens GN CDT1 PE 1 SV 3	Regular	24.3903	47.54	60960.7	2	2	39	4.03	8932	9949.5	4168	2.4688	0.1505	Red
13311	Q96Q06	PLIN4_HUMAN	Perilipin 4 OS Homo sapiens GN PLIN4 PE 2 SV 2	Regular	24.3292	47.52	135287	13	11	137	0.81	22352	2730	13328	0.6774	0.0916	Red
5120	Q9C0G6	DYH6_HUMAN	Dynein heavy chain 6 axonemal OS Homo sapiens GN DNAH6 PE 1 SV 3	Regular	24.3065	47.5	479975	33	22	314	1.66	84011	14158	67647	3.513	1.6862	Red
8197	P08069	IGF1R_HUMAN	Insulin like growth factor 1 receptor OS Homo sapiens GN IGF1R PE 1 SV 1	Regular	24.2047	47.5	157303	17	7	102	2.85	31425	21852	23451	5.4221	0.8529	Red
1389	O95450	ATS2_HUMAN	A disintegrin and metalloproteinase with thrombospondin motifs 2 OS Homo sapiens GN ADAMTS2 PE 2 SV	Regular	24.2046	47.48	138006	5	5	85	2.15	12975	3693	3597	0.9163	0.1265	Red
11558	P29475	NOS1_HUMAN	Nitric oxide synthase brain OS Homo sapiens GN NOS1 PE 1 SV 2	Regular	24.1741	47.47	162339	8	6	115	0.84	11372	4191	9476	1.0399	0.1688	Red
10215	Q9P267	MBD5_HUMAN	Methyl CpG binding domain protein 5 OS Homo sapiens GN MBD5 PE 1 SV 3	Regular	24.15	47.47	161264	10	6	77	2.48	163238	139660	29442	34.6536	5.5884	Red
3015	Q3L8U1	CHD9_HUMAN	Chromodomain helicase DNA binding protein 9 OS Homo sapiens GN CHD9 PE 1 SV 2	Regular	24.0876	47.45	328189	24	12	189	1.21	58416	13646.1	26374	3.386	1.1112	Red	3012 3013 3014
16994	O95359	TACC2_HUMAN	Transforming acidic coiled coil containing protein 2 OS Homo sapiens GN TACC2 PE 1 SV 3	Regular	24.0828	47.43	311823	14	9	229	1.83	60138	21062	19419	5.2261	1.6296	Red
16865	A2RTX5	SYTC2_HUMAN	Probable threonine tRNA ligase 2 cytoplasmic OS Homo sapiens GN TARSL2 PE 1 SV 1	Regular	24.0806	47.41	93672.2	5	5	63	3.12	42984	26064	14005	6.4672	0.6058	Red
4967	O75417	DPOLQ_HUMAN	DNA polymerase theta OS Homo sapiens GN POLQ PE 1 SV 2	Regular	23.9943	47.46	292471	23	12	214	1.97	173897	34487	44663	8.5572	2.5027	Red
1754	Q96NH3	BROMI_HUMAN	Protein broad minded OS Homo sapiens GN BROMI PE 2 SV 4	Regular	23.9496	47.48	146752	7	5	83	3.1	16285	5746	10072	1.4257	0.2092	Red
8453	Q86VS3	IQCH_HUMAN	IQ domain containing protein H OS Homo sapiens GN IQCH PE 2 SV 2	Regular	23.8664	47.5	118090	15	9	61	1.17	103249	5811	22196	1.4419	0.1703	Red
13247	Q99569	PKP4_HUMAN	Plakophilin 4 OS Homo sapiens GN PKP4 PE 1 SV 2	Regular	23.7648	47.48	132667	14	7	92	0.84	149505	10272	47160	2.5488	0.3381	Red	4179 4178
11365	Q14934	NFAC4_HUMAN	Nuclear factor of activated T cells cytoplasmic 4 OS Homo sapiens GN NFATC4 PE 1 SV 2	Regular	23.7219	47.5	96190.3	9	2	61	1.66	18551	15318	9539	3.8008	0.3656	Red
7302	Q4ZG55	GREB1_HUMAN	Protein GREB1 OS Homo sapiens GN GREB1 PE 2 SV 1	Regular	23.6998	47.48	219319	21	11	119	2.41	112436	52492	19801	13.0248	2.8566	Red	7295
3546	Q9C0A0	CNTP4_HUMAN	Contactin associated protein like 4 OS Homo sapiens GN CNTNAP4 PE 1 SV 3	Regular	23.6906	47.49	147271	17	7	82	0.99	125944	67149	21057	16.6616	2.4538	Red
5362	O95163	ELP1_HUMAN	Elongator complex protein 1 OS Homo sapiens GN IKBKAP PE 1 SV 3	Regular	23.6855	47.47	151908	6	5	95	0.9	11647	11643	8981	2.889	0.4389	Red
11771	Q5SRE5	NU188_HUMAN	Nucleoporin NUP188 homolog OS Homo sapiens GN NUP188 PE 1 SV 1	Regular	23.6332	47.45	198496	17	8	127	2.17	110257	52519.5	41148	13.0316	2.5867	Red
10523	P45984	MK09_HUMAN	Mitogen activated protein kinase 9 OS Homo sapiens GN MAPK9 PE 1 SV 2	Regular	23.5494	47.51	48709.4	6	4	39	6.13	19070	15126	7181	3.7532	0.1828	Red
3033	P06276	CHLE_HUMAN	Cholinesterase OS Homo sapiens GN BCHE PE 1 SV 1	Regular	23.4809	47.51	68988.4	10	4	47	4.15	419448	11799	35307	2.9277	0.202	Red
18511	O75604	UBP2_HUMAN	Ubiquitin carboxyl terminal hydrolase 2 OS Homo sapiens GN USP2 PE 1 SV 2	Regular	23.4282	47.5	68927.2	5	4	48	5.95	10409	3592.5	3710	0.8914	0.0614	Red
1507	Q9P281	BAHC1_HUMAN	BAH and coiled coil domain containing protein 1 OS Homo sapiens GN BAHCC1 PE 1 SV 3	Regular	23.3401	47.5	279726	24	16	169	2.53	67828	4372	25385	1.0848	0.3035	Red
19923	Q92610	ZN592_HUMAN	Zinc finger protein 592 OS Homo sapiens GN ZNF592 PE 1 SV 2	Regular	23.2565	47.54	140209	10	7	105	3.31	45274	23239	13992	5.7663	0.8085	Red
12517	O75747	P3C2G_HUMAN	Phosphatidylinositol 4 phosphate 3 kinase C2 domain containing subunit gamma OS Homo sapiens GN PIK3	Regular	23.202	47.52	167540	10	6	106	2.42	56868	35010	16134	8.687	1.4554	Red
9161	P50748	KNTC1_HUMAN	Kinetochore associated protein 1 OS Homo sapiens GN KNTC1 PE 1 SV 1	Regular	23.1626	47.5	253372	24	8	173	0.5	78772	56184	40328	13.9409	3.5322	Red
14273	Q9P2N5	RBM27_HUMAN	RNA binding protein 27 OS Homo sapiens GN RBM27 PE 1 SV 2	Regular	23.0561	47.53	119174	12	7	73	5.66	23942	8695	25041	2.1575	0.2571	Red
19578	Q15911	ZFHX3_HUMAN	Zinc finger homeobox protein 3 OS Homo sapiens GN ZFHX3 PE 1 SV 2	Regular	22.8262	47.53	409096	20	15	242	1.84	127513	31888	45094	7.9123	3.2369	Red	28927 4503 5310 14158 31433 5669 2766 19579 38376 10929 33460
1064	Q96PE2	ARHGH_HUMAN	Rho guanine nucleotide exchange factor 17 OS Homo sapiens GN ARHGEF17 PE 1 SV 1	Regular	22.8136	47.51	223783	18	9	149	2.52	91640	67706	16733	16.7998	3.7595	Red
7646	Q15751	HERC1_HUMAN	Probable E3 ubiquitin protein ligase HERC1 OS Homo sapiens GN HERC1 PE 1 SV 2	Regular	22.7168	47.49	539129	50	25	313	2.47	135442	37442	64260	9.2904	5.0087	Red
8731	P35527	K1C9_HUMAN	Keratin type I cytoskeletal 9 OS Homo sapiens GN KRT9 PE 1 SV 3	Regular	22.6662	47.47	62292.5	5	6	40	8.03	22313	14836.5	8641	3.6814	0.2293	Red
16446	Q9H254	SPTN4_HUMAN	Spectrin beta chain non erythrocytic 4 OS Homo sapiens GN SPTBN4 PE 1 SV 2	Regular	22.5531	47.5	290183	24	17	245	2.73	179172	30405	46181	7.5443	2.1892	Red	16438 16445 16439
2565	Q8N412	CD037_HUMAN	Uncharacterized protein C4orf37 OS Homo sapiens GN C4orf37 PE 2 SV 1	Regular	22.4763	47.5	51116.3	8	3	35	4.36	17850	11913	14196	2.956	0.1511	Red
13351	O15031	PLXB2_HUMAN	Plexin B2 OS Homo sapiens GN PLXNB2 PE 1 SV 3	Regular	22.4504	47.5	207865	23	11	137	3.81	139577	73435	46012	18.2213	3.7876	Red
2325	Q6ZU64	CC108_HUMAN	Coiled coil domain containing protein 108 OS Homo sapiens GN CCDC108 PE 2 SV 2	Regular	22.4194	47.48	220387	10	5	134	1.35	25450	10453.5	6409	2.5938	0.5716	Red
14891	Q9Y6N7	ROBO1_HUMAN	Roundabout homolog 1 OS Homo sapiens GN ROBO1 PE 1 SV 1	Regular	22.4166	47.46	182070	19	9	108	2.6	31661	8470	20174	2.1016	0.3826	Red
4968	O60673	DPOLZ_HUMAN	DNA polymerase zeta catalytic subunit OS Homo sapiens GN REV3L PE 1 SV 2	Regular	22.3853	47.47	356198	41	24	222	2.01	153413	29990	40972	7.4414	2.6506	Red
14911	Q8IWN7	RP1L1_HUMAN	Retinitis pigmentosa 1 like 1 protein OS Homo sapiens GN RP1L1 PE 1 SV 4	Regular	22.2205	47.56	263545	23	11	134	1.65	113096	10529	35639	2.6125	0.6885	Red
1649	Q9NR09	BIRC6_HUMAN	Baculoviral IAP repeat containing protein 6 OS Homo sapiens GN BIRC6 PE 1 SV 2	Regular	22.0768	47.62	536529	16	14	290	1.21	46143	7125	22650	1.7679	0.9485	Red
18825	Q5THJ4	VP13D_HUMAN	Vacuolar protein sorting associated protein 13D OS Homo sapiens GN VPS13D PE 1 SV 1	Regular	22.0445	47.61	495609	56	29	334	1.41	225775	5805	71045	1.4404	0.7139	Red
5497	P58107	EPIPL_HUMAN	Epiplakin OS Homo sapiens GN EPPK1 PE 1 SV 2	Regular	22.0401	47.59	558017	39	25	438	1.91	170016	76711	62851	19.0342	10.6214	Red	4662 13299
5482	P29317	EPHA2_HUMAN	Ephrin type A receptor 2 OS Homo sapiens GN EPHA2 PE 1 SV 2	Regular	21.9962	47.57	109749	7	4	69	2.56	6781	3876	4357	0.9617	0.1056	Red
8611	Q9P266	JCAD_HUMAN	Junctional protein associated with coronary artery disease OS Homo sapiens GN KIAA1462 PE 1 SV 3	Regular	21.903	47.59	149435	19	8	110	0.52	39960	5739	21648	1.424	0.2128	Red	34187
19022	O76024	WFS1_HUMAN	Wolframin OS Homo sapiens GN WFS1 PE 1 SV 2	Regular	21.8558	47.58	101432	10	6	54	2.7	35824	11854.5	8853	2.9414	0.2984	Red
467	O60503	ADCY9_HUMAN	Adenylate cyclase type 9 OS Homo sapiens GN ADCY9 PE 1 SV 4	Regular	21.7709	47.58	152925	12	7	89	2.44	55512	7783.5	18692	1.9313	0.2953	Red
17778	Q7Z410	TMPS9_HUMAN	Transmembrane protease serine 9 OS Homo sapiens GN TMPRSS9 PE 1 SV 2	Regular	21.7285	47.56	116188	15	7	77	0.85	32696	24756	30264	6.1427	0.7137	Red
4146	P49711	CTCF_HUMAN	Transcriptional repressor CTCF OS Homo sapiens GN CTCF PE 1 SV 1	Regular	21.6516	47.54	84325.3	7	4	47	5.64	32268	17335.5	7998	4.3014	0.3627	Red
13126	Q92508	PIEZ1_HUMAN	Piezo type mechanosensitive ion channel component 1 OS Homo sapiens GN PIEZO1 PE 1 SV 4	Regular	21.5253	47.62	290041	9	7	166	0.63	33702	16589.8	12424	4.1164	1.1939	Red	15171
10445	Q8IWI9	MGAP_HUMAN	MAX gene associated protein OS Homo sapiens GN MGA PE 1 SV 2	Regular	20.9923	47.7	333990	29	21	234	1.16	174366	38212	42274	9.4815	3.1667	Red
9117	Q96NJ5	KLH32_HUMAN	Kelch like protein 32 OS Homo sapiens GN KLHL32 PE 2 SV 2	Regular	20.7423	47.76	71446.1	8	4	35	2.9	13204	3558	8885	0.8828	0.0631	Red
10863	Q86WG5	MTMRD_HUMAN	Myotubularin related protein 13 OS Homo sapiens GN SBF2 PE 1 SV 1	Regular	20.7275	47.76	210518	8	9	121	0.81	34429	27393	13949	6.797	1.4309	Red
5312	Q99613	EIF3C_HUMAN	Eukaryotic translation initiation factor 3 subunit C OS Homo sapiens GN EIF3C PE 1 SV 1	Regular	20.48	47.8	106028	17	7	65	3.18	30673	22618	16668	5.6122	0.595	Red
4058	Q7Z408	CSMD2_HUMAN	CUB and sushi domain containing protein 2 OS Homo sapiens GN CSMD2 PE 1 SV 2	Regular	20.4214	47.78	387738	16	9	179	0.66	134436	19557	31511	4.8526	1.8816	Red
12645	O95340	PAPS2_HUMAN	Bifunctional 3 phosphoadenosine 5 phosphosulfate synthase 2 OS Homo sapiens GN PAPSS2 PE 1 SV 2	Regular	20.2343	47.8	70071.1	10	4	50	1.79	18653	5583	7981	1.3853	0.0971	Red
11133	Q8IVL0	NAV3_HUMAN	Neuron navigator 3 OS Homo sapiens GN NAV3 PE 1 SV 3	Regular	20.2026	47.79	257131	26	14	163	0.92	89179	30375	20297	7.5369	1.938	Red	11132
12106	Q68BL8	OLM2B_HUMAN	Olfactomedin like protein 2B OS Homo sapiens GN OLFML2B PE 2 SV 2	Regular	20.1817	47.77	84683.3	6	3	52	2.13	4025	4416	3380	1.0957	0.0928	Red
15009	Q14690	RRP5_HUMAN	Protein RRP5 homolog OS Homo sapiens GN PDCD11 PE 1 SV 3	Regular	20.009	47.81	210070	24	14	147	1.82	78435	10578	28548	2.6247	0.5514	Red
1590	A6H8Y1	BDP1_HUMAN	Transcription factor TFIIIB component B homolog OS Homo sapiens GN BDP1 PE 1 SV 3	Regular	19.7352	47.88	295539	17	11	255	1.6	119733	5092	33490	1.2635	0.3734	Red	14491 8643 24989 39279
16765	O95425	SVIL_HUMAN	Supervillin OS Homo sapiens GN SVIL PE 1 SV 2	Regular	19.5461	47.96	249572	22	15	185	1.08	94425	10698	21406	2.6545	0.6625	Red
13432	P63128	POK4_HUMAN	HERV K 6q14 1 provirus ancestral Gag Pol polyprotein OS Homo sapiens PE 3 SV 3	Regular	19.3888	47.96	124761	13	7	68	2.6	57079	6249	19640	1.5506	0.1934	Red
19754	Q5VUA4	ZN318_HUMAN	Zinc finger protein 318 OS Homo sapiens GN ZNF318 PE 1 SV 2	Regular	19.3003	47.96	252766	20	9	182	1.49	70808	35257	28760	8.7483	2.2113	Red
8669	Q9Y2F5	K0947_HUMAN	Uncharacterized protein KIAA0947 OS Homo sapiens GN KIAA0947 PE 1 SV 5	Regular	19.2878	47.95	250914	15	13	167	1.72	116803	15623	35838	3.8765	0.9727	Red
11486	Q7RTR2	NLRC3_HUMAN	Protein NLRC3 OS Homo sapiens GN NLRC3 PE 2 SV 2	Regular	19.1737	47.93	115970	4	2	83	1.22	7387	16509	3353	4.0964	0.4751	Red
9414	A4D0S4	LAMB4_HUMAN	Laminin subunit beta 4 OS Homo sapiens GN LAMB4 PE 2 SV 1	Regular	19.1665	47.93	200896	16	9	121	0.62	248096	6603	97708	1.6384	0.3291	Red
5585	Q6NXG1	ESRP1_HUMAN	Epithelial splicing regulatory protein 1 OS Homo sapiens GN ESRP1 PE 1 SV 2	Regular	19.0571	47.93	76497.9	3	2	48	0.73	10282	8175	7011	2.0285	0.1552	Red
9802	Q7L1W4	LRC8D_HUMAN	Leucine rich repeat containing protein 8D OS Homo sapiens GN LRRC8D PE 1 SV 1	Regular	19.0506	47.92	99342.1	8	6	62	1.63	37832	4659	4442	1.156	0.1148	Red
4059	Q7Z407	CSMD3_HUMAN	CUB and sushi domain containing protein 3 OS Homo sapiens GN CSMD3 PE 2 SV 3	Regular	19.0326	47.9	414269	17	10	197	1.4	41174	8354	21354	2.0729	0.8587	Red
5638	Q96KP1	EXOC2_HUMAN	Exocyst complex component 2 OS Homo sapiens GN EXOC2 PE 1 SV 1	Regular	18.9494	47.88	105150	20	9	72	2.6	60890	29874	32413	7.4126	0.7794	Red
7365	Q8TAX9	GSDMB_HUMAN	Gasdermin B OS Homo sapiens GN GSDMB PE 1 SV 2	Regular	18.8506	47.92	47014.5	4	4	39	6.57	8825	3432	4392	0.8516	0.04	Red
17413	Q9UPZ6	THS7A_HUMAN	Thrombospondin type 1 domain containing protein 7A OS Homo sapiens GN THSD7A PE 1 SV 4	Regular	18.8232	47.9	192948	9	6	126	3.68	43367	14440	7802	3.583	0.6913	Red
10558	O14686	MLL2_HUMAN	Histone lysine N methyltransferase MLL2 OS Homo sapiens GN MLL2 PE 1 SV 2	Regular	18.6321	47.94	599948	32	15	270	1.01	173985	8291	74534	2.0572	1.2342	Red
512	Q6ZN18	AEBP2_HUMAN	Zinc finger protein AEBP2 OS Homo sapiens GN AEBP2 PE 1 SV 2	Regular	18.2369	48.04	54979.9	6	3	27	2.9	10474	6867	10433	1.7039	0.0937	Red
17424	P01266	THYG_HUMAN	Thyroglobulin OS Homo sapiens GN TG PE 1 SV 5	Regular	18.1936	48.02	311805	22	10	180	1.26	225483	19798	44049	4.9124	1.5317	Red
15732	Q9BYW2	SETD2_HUMAN	Histone lysine N methyltransferase SETD2 OS Homo sapiens GN SETD2 PE 1 SV 3	Regular	18.0096	48.02	290619	24	12	191	1.05	67201	4945.5	25249	1.2271	0.3566	Red
18937	O75717	WDHD1_HUMAN	WD repeat and HMG box DNA binding protein 1 OS Homo sapiens GN WDHD1 PE 1 SV 1	Regular	17.8219	48.02	127450	6	4	82	1.86	45773	21853.5	9488	5.4225	0.6911	Red
11139	A2RRP1	NBAS_HUMAN	Neuroblastoma amplified sequence OS Homo sapiens GN NBAS PE 1 SV 2	Regular	17.7836	48	271879	20	11	158	1.86	45904	6449	26221	1.6002	0.4351	Red
9813	Q96NI6	LRFN5_HUMAN	Leucine rich repeat and fibronectin type III domain containing protein 5 OS Homo sapiens GN LRFN5 PE	Regular	17.5622	48.02	80471.3	4	4	43	2.36	20618	6804	3574	1.6883	0.1359	Red
19829	Q96JM2	ZN462_HUMAN	Zinc finger protein 462 OS Homo sapiens GN ZNF462 PE 1 SV 3	Regular	17.291	48.12	289650	20	10	189	1.4	95549	22407	34330	5.5598	1.6104	Red
18644	Q8N2C7	UNC80_HUMAN	Protein unc 80 homolog OS Homo sapiens GN UNC80 PE 2 SV 2	Regular	17.1717	48.12	367383	32	22	226	1.57	137444	25273	51406	6.271	2.3038	Red
8378	O15327	INP4B_HUMAN	Type II inositol 3 4 bisphosphate 4 phosphatase OS Homo sapiens GN INPP4B PE 2 SV 4	Regular	17.1226	48.1	105822	5	3	95	4.65	46808	46808	8867	11.6144	1.2291	Red
6520	Q9NQT6	FSCN3_HUMAN	Fascin 3 OS Homo sapiens GN FSCN3 PE 1 SV 1	Regular	17.004	48.09	57821.4	9	4	30	4.22	56058	79174.5	9502	19.6455	1.1359	Red
14825	Q5W0B1	RN219_HUMAN	RING finger protein 219 OS Homo sapiens GN RNF219 PE 1 SV 1	Regular	16.9287	48.07	82428.2	10	4	63	2.2	12397	23694	12404	5.8792	0.4846	Red
5491	P29323	EPHB2_HUMAN	Ephrin type B receptor 2 OS Homo sapiens GN EPHB2 PE 1 SV 5	Regular	16.7419	48.12	119204	10	8	81	1.99	31535	4599	14286	1.1411	0.136	Red	5485 5492
4406	A8MPP1	D11L8_HUMAN	Putative ATP dependent RNA helicase DDX11 like protein 8 OS Homo sapiens GN DDX11L8 PE 1 SV 1	Regular	16.6797	48.14	103008	4	4	72	0.88	42586	17157	11660	4.2571	0.4385	Red
4637	Q9ULE3	DEN2A_HUMAN	DENN domain containing protein 2A OS Homo sapiens GN DENND2A PE 2 SV 4	Regular	16.6521	48.13	114765	15	7	86	1.09	121197	40719	17539	10.1035	1.1595	Red
18692	O75691	UTP20_HUMAN	Small subunit processome component 20 homolog OS Homo sapiens GN UTP20 PE 1 SV 3	Regular	16.5562	48.13	321009	22	12	208	0.68	161653	11124	36862	2.7602	0.886	Red
13347	O75051	PLXA2_HUMAN	Plexin A2 OS Homo sapiens GN PLXNA2 PE 1 SV 4	Regular	16.4803	48.13	214355	10	9	128	0.95	47927	6897	18237	1.7113	0.3668	Red
19956	Q14966	ZN638_HUMAN	Zinc finger protein 638 OS Homo sapiens GN ZNF638 PE 1 SV 2	Regular	16.1036	48.17	222051	24	15	152	0.46	60856	18831	27911	4.6725	1.0375	Red
8780	O60229	KALRN_HUMAN	Kalirin OS Homo sapiens GN KALRN PE 1 SV 2	Regular	15.9122	48.17	343311	22	15	246	1.71	82181	11333	73246	2.812	0.9654	Red	18092
750	Q9BXX3	AN30A_HUMAN	Ankyrin repeat domain containing protein 30A OS Homo sapiens GN ANKRD30A PE 1 SV 3	Regular	15.9039	48.17	160546	16	7	134	2.22	63055	23962.5	21898	5.9458	0.9546	Red
4922	Q5JWR5	DOP1_HUMAN	Protein dopey 1 OS Homo sapiens GN DOPEY1 PE 1 SV 1	Regular	15.8751	48.15	279579	18	12	149	1.42	82721	12116	32245	3.0063	0.8405	Red
17015	Q5VWG9	TAF3_HUMAN	Transcription initiation factor TFIID subunit 3 OS Homo sapiens GN TAF3 PE 1 SV 1	Regular	15.7651	48.15	104323	10	6	70	1.4	19204	4743	9339	1.1769	0.1228	Red
13952	Q15262	PTPRK_HUMAN	Receptor type tyrosine protein phosphatase kappa OS Homo sapiens GN PTPRK PE 1 SV 2	Regular	15.6902	48.14	164098	10	4	93	0.97	20789	24807	17397	6.1553	1.0101	Red
18906	P04275	VWF_HUMAN	von Willebrand factor OS Homo sapiens GN VWF PE 1 SV 4	Regular	15.5818	48.12	322609	19	12	183	0.28	67398	36291	21972	9.0048	2.905	Red	18170
3848	P31327	CPSM_HUMAN	Carbamoyl phosphate synthase ammonia mitochondrial OS Homo sapiens GN CPS1 PE 1 SV 2	Regular	14.9495	48.21	166080	15	7	107	1.8	40936	10813.5	17934	2.6831	0.4456	Red
14995	Q969S9	RRF2M_HUMAN	Ribosome releasing factor 2 mitochondrial OS Homo sapiens GN GFM2 PE 1 SV 1	Regular	14.9139	48.23	87456.1	5	3	56	2.18	8929	8472	3307	2.1021	0.1838	Red
1582	Q6W2J9	BCOR_HUMAN	BCL 6 corepressor OS Homo sapiens GN BCOR PE 1 SV 1	Regular	14.8475	48.27	193729	21	8	135	1.03	68665	6609	28468	1.6399	0.3177	Red
16179	Q5VWJ9	SNX30_HUMAN	Sorting nexin 30 OS Homo sapiens GN SNX30 PE 1 SV 1	Regular	14.8131	48.25	50018.8	3	3	38	4.35	3113	2781	1830	0.69	0.0345	Red
13270	Q00722	PLCB2_HUMAN	1 phosphatidylinositol 4 5 bisphosphate phosphodiesterase beta 2 OS Homo sapiens GN PLCB2 PE 1 SV 2	Regular	14.7162	48.25	134994	11	6	96	1.1	34665	10098	19169	2.5056	0.3382	Red
19562	P15822	ZEP1_HUMAN	Zinc finger protein 40 OS Homo sapiens GN HIVEP1 PE 1 SV 3	Regular	14.6256	48.26	299488	20	14	171	1.4	114024	47155	31578	11.7005	3.5042	Red
3584	Q14031	CO4A6_HUMAN	Collagen alpha 6 IV chain OS Homo sapiens GN COL4A6 PE 2 SV 3	Regular	14.0659	48.35	165005	23	11	93	2.13	65296	21287	24735	5.2819	0.8715	Red
6361	O75369	FLNB_HUMAN	Filamin B OS Homo sapiens GN FLNB PE 1 SV 2	Regular	13.9547	48.37	280331	18	12	186	1.58	86473	9936.25	31961	2.4655	0.6911	Red	6360
234	O60706	ABCC9_HUMAN	ATP binding cassette sub family C member 9 OS Homo sapiens GN ABCC9 PE 1 SV 2	Regular	13.9205	48.35	175650	13	7	98	0.45	37599	6426	16562	1.5945	0.2801	Red
9832	P98164	LRP2_HUMAN	Low density lipoprotein receptor related protein 2 OS Homo sapiens GN LRP2 PE 1 SV 3	Regular	13.8999	48.33	540720	23	13	299	1.22	42834	12335	20366	3.0607	1.655	Red
13239	Q16512	PKN1_HUMAN	Serine threonine protein kinase N1 OS Homo sapiens GN PKN1 PE 1 SV 2	Regular	13.8832	48.32	104731	8	6	66	0.64	115468	200580	11351	49.7696	5.2124	Red
1918	Q5SY80	CA101_HUMAN	Uncharacterized protein C1orf101 OS Homo sapiens GN C1orf101 PE 1 SV 1	Regular	13.8103	48.3	110746	5	3	60	1.58	9905	2556	1839	0.6342	0.0702	Red
13001	Q75T13	PGAP1_HUMAN	GPI inositol deacylase OS Homo sapiens GN PGAP1 PE 2 SV 1	Regular	13.7932	48.28	106410	12	5	62	2.06	28263	12966	10731	3.2172	0.3423	Red
16119	Q9Y6H5	SNCAP_HUMAN	Synphilin 1 OS Homo sapiens GN SNCAIP PE 1 SV 2	Regular	13.7712	48.27	101378	7	5	58	3.05	127629	31513.5	34163	7.8194	0.7927	Red
16022	Q7Z7L1	SLN11_HUMAN	Schlafen family member 11 OS Homo sapiens GN SLFN11 PE 1 SV 2	Regular	13.6574	48.25	104375	13	5	73	1.66	67292	11823	16488	2.9336	0.3062	Red	9717
6791	Q9Y5B6	GCFC1_HUMAN	GC rich sequence DNA binding factor 1 OS Homo sapiens GN GCFC1 PE 1 SV 2	Regular	13.6485	48.23	105260	6	3	81	0.76	23080	23253	5573	5.7697	0.6073	Red
554	O95394	AGM1_HUMAN	Phosphoacetylglucosamine mutase OS Homo sapiens GN PGM3 PE 1 SV 1	Regular	13.643	48.21	60308.3	7	4	40	1.85	27097	7522.5	10694	1.8665	0.1126	Red
15730	Q96T68	SETB2_HUMAN	Histone lysine N methyltransferase SETDB2 OS Homo sapiens GN SETDB2 PE 1 SV 2	Regular	13.6147	48.2	83605.2	12	5	58	2.36	27940	3063	15633	0.76	0.0635	Red
2436	Q05D60	CCD67_HUMAN	Coiled coil domain containing protein 67 OS Homo sapiens GN CCDC67 PE 2 SV 2	Regular	13.3971	48.22	71547.9	9	6	51	2.98	67362	40972.5	13883	10.1664	0.7274	Red
2292	Q8ND61	CC020_HUMAN	Uncharacterized protein C3orf20 OS Homo sapiens GN C3orf20 PE 1 SV 2	Regular	13.1351	48.24	102293	9	6	63	0.55	16229	0	7826			Red	16043
10984	Q9Y6X6	MYO16_HUMAN	Unconventional myosin XVI OS Homo sapiens GN MYO16 PE 1 SV 3	Regular	13.1032	48.24	208296	16	9	128	1.94	137599	54080	34300	13.4188	2.7951	Red
8954	Q9Y4C1	KDM3A_HUMAN	Lysine specific demethylase 3A OS Homo sapiens GN KDM3A PE 1 SV 4	Regular	12.9871	48.26	149565	13	9	117	1.21	51730	12610.5	18668	3.129	0.468	Red
18107	Q32P41	TRM5_HUMAN	tRNA guanine 37 N1 methyltransferase OS Homo sapiens GN TRMT5 PE 1 SV 2	Regular	12.6459	48.28	58588.5	0	3	54	2.16	10674	11292	3373	2.8019	0.1642	Red
9381	P32004	L1CAM_HUMAN	Neural cell adhesion molecule L1 OS Homo sapiens GN L1CAM PE 1 SV 2	Regular	12.5756	48.26	140972	13	7	93	0.48	46963	2922	9603	0.725	0.1022	Red
4595	Q86XP3	DDX42_HUMAN	ATP dependent RNA helicase DDX42 OS Homo sapiens GN DDX42 PE 1 SV 1	Regular	12.2322	48.31	103260	8	4	75	1.17	8171	5061	6246	1.2558	0.1297	Red
9030	Q86VH2	KIF27_HUMAN	Kinesin like protein KIF27 OS Homo sapiens GN KIF27 PE 2 SV 1	Regular	12.0911	48.3	161424	7	8	142	0.86	43037	67791	12388	16.8209	2.7153	Red
10561	Q8IZD2	MLL5_HUMAN	Histone lysine N methyltransferase MLL5 OS Homo sapiens GN MLL5 PE 1 SV 1	Regular	11.9722	48.32	207018	14	11	110	1.94	42587	7698	15405	1.9101	0.3954	Yellow
8240	Q9BYH8	IKBZ_HUMAN	NF kappa B inhibitor zeta OS Homo sapiens GN NFKBIZ PE 1 SV 1	Regular	11.7606	48.37	78916.2	5	3	39	1.53	32317	22092	8966	5.4817	0.4326	Red
15810	Q2NKQ1	SGSM1_HUMAN	Small G protein signaling modulator 1 OS Homo sapiens GN SGSM1 PE 1 SV 2	Regular	11.7487	48.35	130973	9	4	87	1.66	13071	5046	10888	1.2521	0.164	Red
11552	P78316	NOP14_HUMAN	Nucleolar protein 14 OS Homo sapiens GN NOP14 PE 1 SV 3	Regular	11.6975	48.34	98352.9	11	6	74	2.8	158154	10685	56696	2.6513	0.2608	Red
10250	O15068	MCF2L_HUMAN	Guanine nucleotide exchange factor DBS OS Homo sapiens GN MCF2L PE 1 SV 2	Regular	11.6394	48.36	129421	13	7	98	1.06	66780	24477	26460	6.0734	0.786	Red
15851	P98077	SHC2_HUMAN	SHC transforming protein 2 OS Homo sapiens GN SHC2 PE 1 SV 4	Regular	11.4841	48.34	62600.5	3	2	42	4.81	21229	58437	3271	14.4999	0.9077	Red
4071	Q6UVK1	CSPG4_HUMAN	Chondroitin sulfate proteoglycan 4 OS Homo sapiens GN CSPG4 PE 1 SV 2	Regular	11.2152	48.36	251221	6	5	119	2.33	31617	6680	5447	1.6575	0.4164	Red
15572	Q14524	SCN5A_HUMAN	Sodium channel protein type 5 subunit alpha OS Homo sapiens GN SCN5A PE 1 SV 2	Regular	11.1717	48.34	229336	9	5	112	2.23	19189	9224	10340	2.2887	0.5249	Red
5941	O94988	FA13A_HUMAN	Protein FAM13A OS Homo sapiens GN FAM13A PE 1 SV 2	Regular	11.021	48.36	117673	6	4	82	1.56	47713	6924	14494	1.718	0.2022	Red
15425	Q14151	SAFB2_HUMAN	Scaffold attachment factor B2 OS Homo sapiens GN SAFB2 PE 1 SV 1	Regular	10.9342	48.34	107987	5	3	98	1.47	15333	25506	5744	6.3288	0.6834	Red
4768	A7MBM2	DISP2_HUMAN	Protein dispatched homolog 2 OS Homo sapiens GN DISP2 PE 2 SV 2	Regular	10.9081	48.36	154342	4	3	83	2.21	11619	15559.5	7722	3.8608	0.5959	Red
19521	Q8WYQ9	ZCH14_HUMAN	Zinc finger CCHC domain containing protein 14 OS Homo sapiens GN ZCCHC14 PE 1 SV 1	Regular	10.2965	48.42	101183	7	4	43	3.06	26793	4186.5	4125	1.0388	0.1051	Red
541	Q99490	AGAP2_HUMAN	Arf GAP with GTPase ANK repeat and PH domain containing protein 2 OS Homo sapiens GN AGAP2 PE 1 SV	Regular	10.1056	48.4	125472	7	4	92	1.17	24978	3120	4027	0.7742	0.0971	Red
17777	Q7RTY8	TMPS7_HUMAN	Transmembrane protease serine 7 OS Homo sapiens GN TMPRSS7 PE 2 SV 3	Regular	9.6425	48.49	96524.6	6	4	67	1.78	27724	49380	9731	12.2526	1.1827	Red
11140	Q8NFP9	NBEA_HUMAN	Neurobeachin OS Homo sapiens GN NBEA PE 1 SV 3	Regular	9.4671	48.49	330274	16	10	222	0.95	46700	8677.5	16326	2.1531	0.7111	Red
5555	Q7Z2K6	ERMP1_HUMAN	Endoplasmic reticulum metallopeptidase 1 OS Homo sapiens GN ERMP1 PE 1 SV 2	Regular	9.4337	48.47	101087	7	3	61	1.44	234968	42753	26618	10.6082	1.0724	Red
2606	P06729	CD2_HUMAN	T cell surface antigen CD2 OS Homo sapiens GN CD2 PE 1 SV 2	Regular	8.8554	48.47	39790.4	8	4	26	2.28	45654	9513	5183	2.3604	0.0939	Red
19447	Q9Y493	ZAN_HUMAN	Zonadhesin OS Homo sapiens GN ZAN PE 2 SV 4	Regular	8.5769	48.46	314731	9	7	142	1.35	44459	22896	5954	5.6812	1.788	Red
7301	Q3V6T2	GRDN_HUMAN	Girdin OS Homo sapiens GN CCDC88A PE 1 SV 2	Regular	8.5603	48.44	216726	14	9	178	1.39	43019	23334	10815	5.7898	1.2548	Red
7572	P51610	HCFC1_HUMAN	Host cell factor 1 OS Homo sapiens GN HCFC1 PE 1 SV 2	Regular	8.5315	48.43	210729	14	6	84	1.33	27539	30723	15970	7.6233	1.6064	Red
6975	P10071	GLI3_HUMAN	Transcriptional activator GLI3 OS Homo sapiens GN GLI3 PE 1 SV 6	Regular	8.2553	48.48	171517	7	4	89	1.01	16688	5778	6613	1.4337	0.2459	Red
17224	Q9H7E2	TDRD3_HUMAN	Tudor domain containing protein 3 OS Homo sapiens GN TDRD3 PE 1 SV 1	Regular	8.0995	48.48	73470	4	4	55	1.54	21104	24309	6680	6.0318	0.4432	Red
11021	Q14896	MYPC3_HUMAN	Myosin binding protein C cardiac type OS Homo sapiens GN MYBPC3 PE 1 SV 3	Regular	7.7966	48.5	141804	10	10	92	1.49	69701	12202.5	14208	3.0278	0.4294	Red
8916	O43526	KCNQ2_HUMAN	Potassium voltage gated channel subfamily KQT member 2 OS Homo sapiens GN KCNQ2 PE 1 SV 2	Regular	7.728	48.5	96988.2	9	5	66	1.15	613316	16527	54505	4.1008	0.3977	Red
2025	P55291	CAD15_HUMAN	Cadherin 15 OS Homo sapiens GN CDH15 PE 1 SV 1	Regular	7.5823	48.5	89315.2	6	4	54	1.35	16402	7359	21670	1.826	0.1631	Red
15576	Q9Y5Y9	SCNAA_HUMAN	Sodium channel protein type 10 subunit alpha OS Homo sapiens GN SCN10A PE 1 SV 2	Regular	7.5793	48.48	222907	21	13	121	1.02	218207	136958	45939	33.9831	7.5751	Red
11198	Q15788	NCOA1_HUMAN	Nuclear receptor coactivator 1 OS Homo sapiens GN NCOA1 PE 1 SV 3	Regular	7.3819	48.48	158069	16	9	87	0.9	93206	15054	30725	3.7353	0.5904	Red
16294	Q8NB90	SPAT5_HUMAN	Spermatogenesis associated protein 5 OS Homo sapiens GN SPATA5 PE 1 SV 3	Regular	7.3215	48.49	98531.9	8	3	71	1.34	23277	5559	4974	1.3793	0.1359	Red
18962	O15213	WDR46_HUMAN	WD repeat containing protein 46 OS Homo sapiens GN WDR46 PE 1 SV 3	Regular	7.2313	48.47	68527.4	6	3	45	2.79	50288	125430	19456	31.1228	2.1328	Red
12714	Q9BZA7	PC11X_HUMAN	Protocadherin 11 X linked OS Homo sapiens GN PCDH11X PE 2 SV 1	Regular	7.1381	48.47	148699	3	2	87	0.59	4294	6687	3676	1.6592	0.2467	Red
20218	Q9H7M6	ZSWM4_HUMAN	Zinc finger SWIM domain containing protein 4 OS Homo sapiens GN ZSWIM4 PE 2 SV 3	Regular	6.5359	48.47	111621	13	6	75	1.62	120299	17910	34334	4.444	0.496	Red
3918	P17927	CR1_HUMAN	Complement receptor type 1 OS Homo sapiens GN CR1 PE 1 SV 3	Regular	6.3151	48.47	230620	7	7	127	0.74	95330	3834	13619	0.9513	0.2194	Red
16796	Q5VT97	SYDE2_HUMAN	Rho GTPase activating protein SYDE2 OS Homo sapiens GN SYDE2 PE 1 SV 2	Regular	6.2056	48.46	134827	3	2	113	0.42	6441	4479	1975	1.1114	0.1498	Red
789	Q7Z5J8	ANKAR_HUMAN	Ankyrin and armadillo repeat containing protein OS Homo sapiens GN ANKAR PE 2 SV 3	Regular	5.8119	48.46	163908	15	8	113	0.91	34840	62367	17217	15.475	2.5365	Red
11086	P59045	NAL11_HUMAN	NACHT LRR and PYD domains containing protein 11 OS Homo sapiens GN NLRP11 PE 2 SV 2	Regular	5.6921	48.44	120060	4	2	83	1.26	20837	4155	2001	1.031	0.1238	Red
459	Q08828	ADCY1_HUMAN	Adenylate cyclase type 1 OS Homo sapiens GN ADCY1 PE 1 SV 2	Regular	5.5464	48.42	125379	7	4	68	1.88	34321	2751	7115	0.6826	0.0856	Red
11497	Q13224	NMDE2_HUMAN	Glutamate NMDA receptor subunit epsilon 2 OS Homo sapiens GN GRIN2B PE 1 SV 3	Regular	5.4833	48.41	168078	12	8	108	0.54	37602	38202	10416	9.479	1.5932	Red
2556	Q86YA3	CD021_HUMAN	Uncharacterized protein C4orf21 OS Homo sapiens GN C4orf21 PE 1 SV 2	Regular	5.2014	48.43	120488	22	9	91	1.41	67694	38469	23357	9.5453	1.1501	Red
8966	O15054	KDM6B_HUMAN	Lysine specific demethylase 6B OS Homo sapiens GN KDM6B PE 1 SV 4	Regular	4.2335	48.5	178286	7	5	107	0.97	33732	7617	13021	1.89	0.337	Red
15503	O94855	SC24D_HUMAN	Protein transport protein Sec24D OS Homo sapiens GN SEC24D PE 1 SV 2	Regular	4.1478	48.48	114550	3	3	53	0.97	188708	167676	41082	41.6052	4.7659	Red
1739	O60885	BRD4_HUMAN	Bromodomain containing protein 4 OS Homo sapiens GN BRD4 PE 1 SV 2	Regular	3.7	48.46	152675	4	2	87	1.25	5653	10734	4027	2.6634	0.4066	Red
10535	Q9BUB5	MKNK1_HUMAN	MAP kinase interacting serine threonine protein kinase 1 OS Homo sapiens GN MKNK1 PE 1 SV 1	Regular	3.2044	48.45	52083.8	3	3	34	1.29	15049	26514	3295	6.5789	0.3427	Red
11320	Q6X4W1	NELF_HUMAN	Nasal embryonic luteinizing hormone releasing hormone factor OS Homo sapiens GN NELF PE 1 SV 1	Regular	2.0163	48.48	60599.6	9	5	45	1.32	10921	2646	6078	0.6565	0.0398	Red
12788	Q08174	PCDH1_HUMAN	Protocadherin 1 OS Homo sapiens GN PCDH1 PE 1 SV 2	Regular	1.634	48.47	115086	7	3	69	1.04	7821	8094	7388	2.0084	0.2311	Red
966	P08519	APOA_HUMAN	Apolipoprotein a OS Homo sapiens GN LPA PE 1 SV 1	Regular	1.3866	48.45	515063	5	4	245	0.26	33149	29073	8737	7.2138	3.7156	Red
23247	RANDOM3014	RANDOM3014	Random Sequence 3014	Random	78.809	0	337598	6	1	226	0.17	146235	0	38238			Green	10517 13020
25356	RANDOM5123	RANDOM5123	Random Sequence 5123	Random	23.5937	0	506663	2	1	349	0.11	11231	0	6313			Green	4 5 8
33316	RANDOM13083	RANDOM13083	Random Sequence 13083	Random	497.683	0	96413	6	1	70	0.71	362396	0	99865			Green	9510 9509
20996	RANDOM763	RANDOM763	Random Sequence 763	Random	44.6241	0	152956	3	1	102	0.37	20004	0	9134			Green	10632 14158 38881
38881	RANDOM18648	RANDOM18648	Random Sequence 18648	Random	44.6241	0	91596.8	3	1	63	0.62	20004	0	9134			Green	10632 20996 14158
28927	RANDOM8694	RANDOM8694	Random Sequence 8694	Random	0.5541	0	220208	1	1	143	0.21	14408	0	6413			Red	2766 4503 38376 33460 10929 5310 14158 31433 19578 5669
33460	RANDOM13227	RANDOM13227	Random Sequence 13227	Random	0.5541	0	153032	1	1	111	0.29	14408	0	6413			Red	28927 2766 4503 38376 10929 5310 14158 31433 19578 5669
31433	RANDOM11200	RANDOM11200	Random Sequence 11200	Random	0.5541	0	163729	1	1	104	0.27	14408	0	6413			Red	28927 2766 4503 38376 33460 10929 5310 14158 19578 5669
38376	RANDOM18143	RANDOM18143	Random Sequence 18143	Random	0.8907	0	438072	3	2	303	0.1	25628	0	9060			Red	28927 4503 27350 5310 19578 10929 14158 31433 5669 2766 3983 33460
26718	RANDOM6485	RANDOM6485	Random Sequence 6485	Random	21.6794	0	246438	4	1	159	0.23	7871	0	2785			Yellow	12551
40463	RANDOM20230	RANDOM20230	Random Sequence 20230	Random	21.8433	0	85966.9	3	1	60	0.79	12307	0	5295			Yellow	12880
33450	RANDOM13217	RANDOM13217	Random Sequence 13217	Random	0.969	0	459203	0	1	307	0.15	4153	0	564			Red	10273
36783	RANDOM16550	RANDOM16550	Random Sequence 16550	Random	7.3592	0	578871	1	1	362	0	9040	0	1393			Red	1135
30791	RANDOM10558	RANDOM10558	Random Sequence 10558	Random	103.01	0	447930	2	1	275	0.13	6760	0	978			Yellow	15858
37255	RANDOM17022	RANDOM17022	Random Sequence 17022	Random	35.1215	0	75852.9	2	1	53	0.74	6483	0	3873			Red	15172 10964 15171
32008	RANDOM11775	RANDOM11775	Random Sequence 11775	Random	36.9713	0	235244	2	1	154	0.24	64123	0	12605			Yellow	15860 1384
38490	RANDOM18257	RANDOM18257	Random Sequence 18257	Random	4.6997	0	65699.6	3	2	44	0	24815	0	5973			Red	590 2113 26355 37247 30066 4755 23771 38110 8583 788 11610 1224 36249 13946 25351 34809 34165 8582
30066	RANDOM9833	RANDOM9833	Random Sequence 9833	Random	6.0559	0	524768	3	2	345	0.09	22153	0	5576			Red	24005 38490 2113 1224 23662 27906 34809 6362 34165 23771
34809	RANDOM14576	RANDOM14576	Random Sequence 14576	Random	4.4767	0	233301	2	1	155	0	19421	0	5101			Red	38490 2113 1224 30066 34165 23771
34165	RANDOM13932	RANDOM13932	Random Sequence 13932	Random	4.4767	0	101854	2	1	74	0	19421	0	5101			Red	38490 2113 1224 30066 34809 23771
23771	RANDOM3538	RANDOM3538	Random Sequence 3538	Random	4.4767	0	116049	2	1	79	0	19421	0	5101			Red	38490 2113 1224 30066 34809 34165
33474	RANDOM13241	RANDOM13241	Random Sequence 13241	Random	2.4265	0	111969	2	1	69	0.51	28786	0	8895			Red	12621
21307	RANDOM1074	RANDOM1074	Random Sequence 1074	Random	10.1741	0	252768	3	1	178	0.27	3352	0	4864			Red	3377
26830	RANDOM6597	RANDOM6597	Random Sequence 6597	Random	65.0207	0	66032.7	3	1	47	0.86	22566	0	2966			Red	8355
21025	RANDOM792	RANDOM792	Random Sequence 792	Random	7.6726	0	285045	3	1	188	0.16	2174	0	1071			Red	25080 4239 35054 34037 5656
25080	RANDOM4847	RANDOM4847	Random Sequence 4847	Random	7.6726	0	341643	3	1	244	0.13	2174	0	1071			Red	21025 4239 35054 34037 5656
35054	RANDOM14821	RANDOM14821	Random Sequence 14821	Random	7.6726	0	584831	3	1	384	0.08	2174	0	1071			Red	21025 25080 4239 34037 5656
34037	RANDOM13804	RANDOM13804	Random Sequence 13804	Random	7.6726	0	347193	3	1	226	0.13	2174	0	1071			Red	21025 25080 4239 35054 5656
23044	RANDOM2811	RANDOM2811	Random Sequence 2811	Random	6.8365	0	338589	3	1	239	0.17	7269	0	3562			Red	2666 5113 28254 15441 32636 31365 1511 16071 13566
32636	RANDOM12403	RANDOM12403	Random Sequence 12403	Random	6.8365	0	107525	3	1	71	0.53	7269	0	3562			Red	2666 5113 28254 15441 23044 31365 1511 16071 13566
31365	RANDOM11132	RANDOM11132	Random Sequence 11132	Random	6.8365	0	211374	3	1	148	0.27	7269	0	3562			Red	2666 5113 28254 15441 23044 32636 1511 16071 13566
28254	RANDOM8021	RANDOM8021	Random Sequence 8021	Random	6.8365	0	576595	3	1	387	0.1	7269	0	3562			Red	2666 5113 15441 23044 32636 31365 1511 16071 13566
37716	RANDOM17483	RANDOM17483	Random Sequence 17483	Random	6.5176	0	69405	2	1	55	0.82	1750	0	779			Red	11008 5526
31327	RANDOM11094	RANDOM11094	Random Sequence 11094	Random	3.4534	0	164663	3	1	128	0	21303	0	10952			Red	16447
36313	RANDOM16080	RANDOM16080	Random Sequence 16080	Random	4.4064	0	225073	3	1	155	0.2	6308	0	1337			Red	8584
34728	RANDOM14495	RANDOM14495	Random Sequence 14495	Random	12.6515	0	229332	3	1	160	0	20065	0	2504			Red	10689
30251	RANDOM10018	RANDOM10018	Random Sequence 10018	Random	0.8122	0	108512	1	1	83	0	1193	0	519			Red	3983
27350	RANDOM7117	RANDOM7117	Random Sequence 7117	Random	0.3367	0	251921	2	1	184	0	11220	0	2647			Red	38376 3983
21443	RANDOM1210	RANDOM1210	Random Sequence 1210	Random	0.9027	0	337821	1	1	239	0	2191	0	1694			Red	10271 39279 13299
39279	RANDOM19046	RANDOM19046	Random Sequence 19046	Random	1.0102	0	201283	1	2	119	0	60382	0	2716			Red	14491 1590 10271 21443 8643 24989 13299
36711	RANDOM16478	RANDOM16478	Random Sequence 16478	Random	0.7062	0	363112	2	1	225	0	4667	0	2119			Red	7105
37228	RANDOM16995	RANDOM16995	Random Sequence 16995	Random	0.0872	0	332519	0	1	221	0	28141	0	260			Red	12655
25731	RANDOM5498	RANDOM5498	Random Sequence 5498	Random	22.7457	0	571710	4	1	393	0	24884	0	2202			Red	18629
31591	RANDOM11358	RANDOM11358	Random Sequence 11358	Random	22.4491	0	319140	2	1	225	0.18	14614	0	1502			Red	12492
24005	RANDOM3772	RANDOM3772	Random Sequence 3772	Random	1.5792	0	275555	1	1	190	0.16	2732	0	475			Red	6362 23662 27906 30066
23662	RANDOM3429	RANDOM3429	Random Sequence 3429	Random	1.5792	0	75874.6	1	1	57	0.59	2732	0	475			Red	6362 27906 30066 24005
27906	RANDOM7673	RANDOM7673	Random Sequence 7673	Random	1.5792	0	160698	1	1	96	0.28	2732	0	475			Red	6362 23662 30066 24005
24989	RANDOM4756	RANDOM4756	Random Sequence 4756	Random	0.1075	0	251480	0	1	175	0	58191	0	1022			Red	14491 1590 8643 39279
26355	RANDOM6122	RANDOM6122	Random Sequence 6122	Random	0.223	0	516342	1	1	342	0	5394	0	872			Red	590 37247 4755 38110 8583 788 38490 11610 36249 13946 25351 8582
36249	RANDOM16016	RANDOM16016	Random Sequence 16016	Random	0.223	0	172870	1	1	99	0	5394	0	872			Red	590 26355 37247 4755 38110 8583 788 38490 11610 13946 25351 8582
38110	RANDOM17877	RANDOM17877	Random Sequence 17877	Random	0.223	0	172966	1	1	102	0	5394	0	872			Red	590 26355 37247 4755 8583 788 38490 11610 36249 13946 25351 8582
25351	RANDOM5118	RANDOM5118	Random Sequence 5118	Random	0.223	0	496207	1	1	308	0	5394	0	872			Red	590 26355 37247 4755 38110 8583 788 38490 11610 36249 13946 8582
37247	RANDOM17014	RANDOM17014	Random Sequence 17014	Random	0.223	0	209705	1	1	135	0	5394	0	872			Red	590 26355 4755 38110 8583 788 38490 11610 36249 13946 25351 8582
36120	RANDOM15887	RANDOM15887	Random Sequence 15887	Random	1.7442	0	202274	1	1	138	0.28	3594	0	759			Red	8460 17273
38864	RANDOM18631	RANDOM18631	Random Sequence 18631	Random	0.5818	0	248729	2	1	179	0	1039	0	771			Red	10937
22243	RANDOM2010	RANDOM2010	Random Sequence 2010	Random	1.5135	0	267130	0	1	170	0	1894	0	572			Red	11287
31224	RANDOM10991	RANDOM10991	Random Sequence 10991	Random	26.4488	0	124330	3	1	83	0.45	34448	0	7528			Red	2352
36524	RANDOM16291	RANDOM16291	Random Sequence 16291	Random	4.8903	0	70167.3	2	1	49	0.97	4055	0	945			Red	2374
32967	RANDOM12734	RANDOM12734	Random Sequence 12734	Random	6.6124	0	325612	2	1	230	0.17	2521	0	2476			Red	19840
34187	RANDOM13954	RANDOM13954	Random Sequence 13954	Random	3.7419	0	162159	1	1	104	0	890	0	596			Red	8611
