# Supplementary material for: Targeting Hodgkin and Reed–Sternberg Cells with an Inhibitor of Heat-Shock Protein 90: Molecular Pathways of Response and Potential Mechanisms of Resistance
Source: Int J Mol Sci. 2018 Mar 13;19(3):836. doi: 10.3390/ijms19030836 (PMC5877697; doi:10.3390/ijms19030836)
Supplement: Supplementary file 1 [file ijms-19-00836-s001.zip › Supplementary Table S4.xlsx]

## Sheet: 20140319_L428_T_1_2D58MIN_01_IA
protein.key	protein.Entry	protein.Accession	protein.Description	protein.dataBaseType	protein.score	protein.falsePositiveRate	protein.avgMass	protein.MatchedProducts	protein.matchedPeptides	protein.digestPeps	protein.seqCover(%)	protein.MatchedPeptideIntenSum	protein.top3MatchedPeptideIntenSum	protein.MatchedProductIntenSum	protein.fmolOnColumn	protein.ngramOnColumn	protein.AutoCurate	protein.Key_ForHomologs
387	P60709	ACTB_HUMAN	Actin cytoplasmic 1 OS Homo sapiens GN ACTB PE 1 SV 1	Regular	93770	0	42079	387	26	34	71.2	11003870	3564634	3500370	798.497	33.6	Green	389 398 386 13467 13462 385
389	P63261	ACTG_HUMAN	Actin cytoplasmic 2 OS Homo sapiens GN ACTG1 PE 1 SV 1	Regular	93770	0	42135.1	387	26	34	71.2	11003870	0	3500370			Green	398 386 13467 13462 387 385
13712	P07737	PROF1_HUMAN	Profilin 1 OS Homo sapiens GN PFN1 PE 1 SV 2	Regular	44121.4	0	15225.3	97	8	16	60	1162267	736778	276678	165.042	2.5128	Green
398	P68133	ACTS_HUMAN	Actin alpha skeletal muscle OS Homo sapiens GN ACTA1 PE 1 SV 1	Regular	42065.5	0	42393.3	216	18	34	39.52	6654402	2246632	2116728	503.257	21.3347	Green	389 386 13467 13462 387 385
9183	P14618	KPYM_HUMAN	Pyruvate kinase isozymes M1 M2 OS Homo sapiens GN PKM PE 1 SV 4	Regular	41220.4	0	58507.3	396	36	43	69.68	3713438	878286	1107170	196.741	11.5108	Green	9184
5431	P06733	ENOA_HUMAN	Alpha enolase OS Homo sapiens GN ENO1 PE 1 SV 2	Regular	39411.6	0	47511.2	243	28	31	66.13	3294207	986574	964937	220.998	10.4999	Green	5434 5432 10316
6615	P04406	G3P_HUMAN	Glyceraldehyde 3 phosphate dehydrogenase OS Homo sapiens GN GAPDH PE 1 SV 3	Regular	36896.1	0	36224.4	204	15	21	54.33	3319891	1570343	1135512	351.765	12.7425	Green
13462	Q6S8J3	POTEE_HUMAN	POTE ankyrin domain family member E OS Homo sapiens GN POTEE PE 1 SV 3	Regular	36124.4	0	122961	158	18	100	17.21	4597280	444222	1320270	99.5081	12.2356	Green	389 398 386 13467 387 385
7876	P07900	HS90A_HUMAN	Heat shock protein HSP 90 alpha OS Homo sapiens GN HSP90AA1 PE 1 SV 5	Regular	34156.2	0	85059.1	373	41	92	56.42	4232961	483894	1093655	108.395	9.22	Green	5439 7516 7877 7875 7518 6739
13020	P00558	PGK1_HUMAN	Phosphoglycerate kinase 1 OS Homo sapiens GN PGK1 PE 1 SV 3	Regular	33588.9	0	45014	290	27	33	71.22	2194598	570458	629154	127.786	5.7521	Green	14021 18692 18114
7877	P08238	HS90B_HUMAN	Heat shock protein HSP 90 beta OS Homo sapiens GN HSP90AB1 PE 1 SV 4	Regular	32740.7	0	83606.5	362	39	67	55.11	4543902	636011	1284009	142.47	11.9114	Green	5439 7516 7875 7518 6739 7876
9510	P07195	LDHB_HUMAN	L lactate dehydrogenase B chain OS Homo sapiens GN LDHB PE 1 SV 2	Regular	31858.5	0	36923.7	211	17	25	49.7	2735599	742588	649606	166.344	6.142	Green	9509 9507
17921	P60174	TPIS_HUMAN	Triosephosphate isomerase OS Homo sapiens GN TPI1 PE 1 SV 3	Regular	31438.4	0	31076.2	203	20	26	75.52	1810440	562201	557117	125.936	3.9136	Green
7899	P11142	HSP7C_HUMAN	Heat shock cognate 71 kDa protein OS Homo sapiens GN HSPA8 PE 1 SV 1	Regular	30948.8	0	71126.3	377	34	50	60.99	3696462	585183	1040782	131.084	9.3235	Green	7895 7894
14699	P62987	RL40_HUMAN	Ubiquitin 60S ribosomal protein L40 OS Homo sapiens GN UBA52 PE 1 SV 2	Regular	30531	0	15013.5	56	6	9	41.41	1102563	816075	301536	182.805	2.7445	Green
13526	P62937	PPIA_HUMAN	Peptidyl prolyl cis trans isomerase A OS Homo sapiens GN PPIA PE 1 SV 2	Regular	25284.8	0	18240.6	145	16	12	83.03	2509616	1074062	612809	240.596	4.3886	Green	14304 13527
5226	P68104	EF1A1_HUMAN	Elongation factor 1 alpha 1 OS Homo sapiens GN EEF1A1 PE 1 SV 1	Regular	23892.8	0	50483.1	210	18	32	52.81	2174768	850063	497342	190.419	9.6129	Green	5228
5228	Q5VTE0	EF1A3_HUMAN	Putative elongation factor 1 alpha like 3 OS Homo sapiens GN EEF1A1P5 PE 5 SV 1	Regular	23892.8	0	50527.3	210	18	32	52.81	2174768	0	497342			Green	5226
0	P00330	ADH1_YEAST	Alcohol dehydrogenase 1 OS Saccharomyces cerevisiae strain ATCC 204508 S288c GN ADH1 PE 1 SV 5	Regular	21946.1	0	37305.4	140	16	25	48.56	2246665	892836	574431	200	7.4611	Green
9509	P00338	LDHA_HUMAN	L lactate dehydrogenase A chain OS Homo sapiens GN LDHA PE 1 SV 2	Regular	20519	0	36973.9	167	22	31	60.84	1749634	428129	358454	95.9032	3.5459	Green	9510 9507
385	Q562R1	ACTBL_HUMAN	Beta actin like protein 2 OS Homo sapiens GN ACTBL2 PE 1 SV 2	Regular	20481.4	0	42345.5	116	10	35	23.94	3557177	1260939	1243482	282.457	11.9608	Green	389 398 386 13467 387 13462
386	Q9BYX7	ACTBM_HUMAN	Putative beta actin like protein 3 OS Homo sapiens GN POTEKP PE 5 SV 1	Regular	19280.5	0	42358.5	83	9	30	23.2	3143210	543040	899354	121.644	5.1527	Green	389 398 13467 13462 387 385
12997	P18669	PGAM1_HUMAN	Phosphoglycerate mutase 1 OS Homo sapiens GN PGAM1 PE 1 SV 2	Regular	17214.7	0	28918	131	14	20	67.32	568432	229183	182463	51.3382	1.4846	Green
8	P63104	1433Z_HUMAN	14 3 3 protein zeta delta OS Homo sapiens GN YWHAZ PE 1 SV 1	Regular	16313.4	0	27916.2	103	12	25	61.63	894323	231039	228545	51.754	1.4448	Green	2 4 5 7 3
11230	P22392	NDKB_HUMAN	Nucleoside diphosphate kinase B OS Homo sapiens GN NME2 PE 1 SV 1	Regular	16264.2	0	17412.1	85	8	14	55.92	691517	259010	176150	58.0195	1.0102	Green	11229
11621	P06748	NPM_HUMAN	Nucleophosmin OS Homo sapiens GN NPM1 PE 1 SV 2	Regular	14564.5	0	32746.2	121	14	22	54.42	1199621	491139	335747	110.018	3.6027	Green
11229	P15531	NDKA_HUMAN	Nucleoside diphosphate kinase A OS Homo sapiens GN NME1 PE 1 SV 1	Regular	13179.2	0	17319.8	65	7	15	49.34	519376	176705	126402	39.5828	0.6856	Green	11230
7	P27348	1433T_HUMAN	14 3 3 protein theta OS Homo sapiens GN YWHAQ PE 1 SV 1	Regular	12802.3	0	28049.4	116	15	24	55.51	747739	164214	196729	36.7848	1.0318	Green	2 4 5 8 3
7516	Q58FF8	H90B2_HUMAN	Putative heat shock protein HSP 90 beta 2 OS Homo sapiens GN HSP90AB2P PE 1 SV 2	Regular	12747.5	0	44520.1	97	13	44	28.08	1498752	262081	358819	58.7075	2.6137	Green	5439 7877 7875 7518 7876
17082	P07437	TBB5_HUMAN	Tubulin beta chain OS Homo sapiens GN TUBB PE 1 SV 2	Regular	12679.8	0	50127.2	167	18	30	58.56	848552	256293	237793	57.411	2.8779	Green	17081 17076
13467	P0CG39	POTEJ_HUMAN	POTE ankyrin domain family member J OS Homo sapiens GN POTEJ PE 3 SV 1	Regular	12637.5	0	118816	97	18	97	17.82	3048908	321171	689012	71.9439	8.5481	Green	389 398 386 13462 387 385
17066	Q71U36	TBA1A_HUMAN	Tubulin alpha 1A chain OS Homo sapiens GN TUBA1A PE 1 SV 1	Regular	12601.2	0	50820	127	18	34	49.67	983116	34187	291657	7.6581	0.3892	Green	17069 17068 17073 17067
17068	Q9BQE3	TBA1C_HUMAN	Tubulin alpha 1C chain OS Homo sapiens GN TUBA1C PE 1 SV 1	Regular	12539	0	50579.7	125	18	34	49.22	947374	7210.49	284280	1.6152	0.0817	Green	17069 17073 17067 17066
17067	P68363	TBA1B_HUMAN	Tubulin alpha 1B chain OS Homo sapiens GN TUBA1B PE 1 SV 1	Regular	12464.1	0	50836	129	19	34	52.77	1012268	283208	288575	63.4401	3.225	Green	17069 17068 17073 17066
14184	P62826	RAN_HUMAN	GTP binding nuclear protein Ran OS Homo sapiens GN RAN PE 1 SV 3	Regular	12348.9	0	24594.2	62	9	17	42.59	531332	243648	95405	54.5784	1.3423	Green
7895	P54652	HSP72_HUMAN	Heat shock related 70 kDa protein 2 OS Homo sapiens GN HSPA2 PE 1 SV 1	Regular	12134.6	0	70306.2	147	16	50	24.41	1582310	16536	451578	3.7041	0.2604	Green	7899 7894
3625	P23528	COF1_HUMAN	Cofilin 1 OS Homo sapiens GN CFL1 PE 1 SV 3	Regular	11564.9	0	18730.6	73	12	19	59.64	397690	215412	76125	48.2534	0.9038	Green
3	P62258	1433E_HUMAN	14 3 3 protein epsilon OS Homo sapiens GN YWHAE PE 1 SV 1	Regular	11472.9	0	29345	70	11	29	48.63	499270	127991	133126	28.6706	0.8413	Green	2 4 5 7 8
661	P04075	ALDOA_HUMAN	Fructose bisphosphate aldolase A OS Homo sapiens GN ALDOA PE 1 SV 2	Regular	10826.2	0	39876.3	155	25	31	83.52	1069822	290356	243935	65.0413	2.5936	Green	663
6518	Q16658	FSCN1_HUMAN	Fascin OS Homo sapiens GN FSCN1 PE 1 SV 3	Regular	10740.1	0	55157.3	195	22	42	53.55	1574821	451367	391610	101.109	5.5769	Green
17081	P68371	TBB4B_HUMAN	Tubulin beta 4B chain OS Homo sapiens GN TUBB4B PE 1 SV 1	Regular	9933.19	0	50287.4	152	18	30	59.55	658005	104266	162885	23.3561	1.1745	Green	17082 17076
7518	Q58FF6	H90B4_HUMAN	Putative heat shock protein HSP 90 beta 4 OS Homo sapiens GN HSP90AB4P PE 5 SV 1	Regular	9836.91	0	58891.8	89	14	54	22.57	1002202	10320.6	274842	2.3119	0.1362	Green	5439 7516 7877 7875 7876
7875	Q58FG0	HS905_HUMAN	Putative heat shock protein HSP 90 alpha A5 OS Homo sapiens GN HSP90AA5P PE 1 SV 1	Regular	9790.23	0	38966.2	71	9	33	22.16	749631	10908.6	153595	2.4436	0.0952	Green	7516 7877 7518 7876
17069	Q13748	TBA3C_HUMAN	Tubulin alpha 3C D chain OS Homo sapiens GN TUBA3C PE 1 SV 3	Regular	9188.41	0	50644	111	17	34	47.78	845580	100880	230400	22.5976	1.1444	Green	17068 17073 17067 17066
5434	P09104	ENOG_HUMAN	Gamma enolase OS Homo sapiens GN ENO2 PE 1 SV 3	Regular	8777.27	0	47610.8	62	9	30	31.8	868833	346941	285970	77.7166	3.7001	Green	5432 5431
5432	P13929	ENOB_HUMAN	Beta enolase OS Homo sapiens GN ENO3 PE 1 SV 4	Regular	8591.98	0	47274	61	11	28	35.48	702991	26982.1	306172	6.0441	0.2857	Green	5434 5431
4383	P04080	CYTB_HUMAN	Cystatin B OS Homo sapiens GN CSTB PE 1 SV 2	Regular	8558.6	0	11196.6	34	5	7	60.2	143459	119085	21012	26.6757	0.2987	Green
17195	P53999	TCP4_HUMAN	Activated RNA polymerase II transcriptional coactivator p15 OS Homo sapiens GN SUB1 PE 1 SV 3	Regular	8520.31	0	14395.4	35	6	15	42.52	208798	151318	56914	33.896	0.4879	Green
7472	Q96KK5	H2A1H_HUMAN	Histone H2A type 1 H OS Homo sapiens GN HIST1H2AH PE 1 SV 3	Regular	7959.6	0	13906.3	26	3	7	27.34	230047	230047	52012	51.5318	0.7166	Green
7894	P08107	HSP71_HUMAN	Heat shock 70 kDa protein 1A 1B OS Homo sapiens GN HSPA1A PE 1 SV 5	Regular	7738.2	0	70337.5	151	23	49	46.96	1141820	164553	304009	36.8608	2.5927	Green	7899 7895
13397	P00491	PNPH_HUMAN	Purine nucleoside phosphorylase OS Homo sapiens GN PNP PE 1 SV 2	Regular	7656.1	0	32346.1	92	15	21	68.86	376925	148045	89908	33.1629	1.0727	Green
17028	P37802	TAGL2_HUMAN	Transgelin 2 OS Homo sapiens GN TAGLN2 PE 1 SV 3	Regular	7576.29	0	22562.6	67	11	25	74.37	442716	185975	97235	41.6594	0.9399	Green
10490	P14174	MIF_HUMAN	Macrophage migration inhibitory factor OS Homo sapiens GN MIF PE 1 SV 4	Regular	7197.51	0	12647.4	15	2	6	17.39	208987	310804	37590	69.6219	0.8805	Green
8129	P60842	IF4A1_HUMAN	Eukaryotic initiation factor 4A I OS Homo sapiens GN EIF4A1 PE 1 SV 1	Regular	6760.29	0	46382.2	113	22	46	52.22	570748	158913	127510	35.5974	1.6511	Green	8130 8987 31217 8131
12810	P12004	PCNA_HUMAN	Proliferating cell nuclear antigen OS Homo sapiens GN PCNA PE 1 SV 1	Regular	6485.2	0	29111	49	9	23	40.61	184683	104278	51587	23.3588	0.68	Green
6059	Q01469	FABP5_HUMAN	Fatty acid binding protein epidermal OS Homo sapiens GN FABP5 PE 1 SV 3	Regular	6449.44	0	15506.6	43	6	14	46.67	270935	169371	64420	37.94	0.5883	Green
17398	P10599	THIO_HUMAN	Thioredoxin OS Homo sapiens GN TXN PE 1 SV 3	Regular	6439.24	0	12022.7	31	4	9	38.1	279616	262856	69004	58.8811	0.7079	Green
752	P39687	AN32A_HUMAN	Acidic leucine rich nuclear phosphoprotein 32 family member A OS Homo sapiens GN ANP32A PE 1 SV 1	Regular	6126.3	0	28699.5	49	7	15	26.91	219714	95082.9	40007	21.2991	0.6113	Green	753
14711	P05386	RLA1_HUMAN	60S acidic ribosomal protein P1 OS Homo sapiens GN RPLP1 PE 1 SV 1	Regular	6039.7	0	11628	11	2	7	51.75	71716	107574	16097	24.0972	0.2802	Green
5	P61981	1433G_HUMAN	14 3 3 protein gamma OS Homo sapiens GN YWHAG PE 1 SV 2	Regular	5723.71	0	28473.7	43	8	25	40.89	445813	43815.3	109613	9.8149	0.2795	Green	2 4 8 7 3
12669	Q99497	PARK7_HUMAN	Protein DJ 1 OS Homo sapiens GN PARK7 PE 1 SV 2	Regular	5715.8	0	20062.2	47	7	27	42.86	185533	125149	54199	28.034	0.5624	Green
16497	P37108	SRP14_HUMAN	Signal recognition particle 14 kDa protein OS Homo sapiens GN SRP14 PE 1 SV 2	Regular	5667.41	0	14684	37	5	12	45.59	55527	53446.5	53625	11.9723	0.1758	Green
2	P31946	1433B_HUMAN	14 3 3 protein beta alpha OS Homo sapiens GN YWHAB PE 1 SV 3	Regular	5340.13	0	28196.5	39	6	22	28.46	465697	40692.8	113626	9.1154	0.257	Green	4 5 8 7 3
16214	P00441	SODC_HUMAN	Superoxide dismutase Cu Zn OS Homo sapiens GN SOD1 PE 1 SV 2	Regular	5334.4	0	16163.9	45	10	13	77.27	246667	140663	62126	31.5093	0.5093	Green
7490	P58876	H2B1D_HUMAN	Histone H2B type 1 D OS Homo sapiens GN HIST1H2BD PE 1 SV 2	Regular	5334.06	0	13936.2	21	3	11	21.43	188547	186788	38204	41.8415	0.5831	Green
2083	P62158	CALM_HUMAN	Calmodulin OS Homo sapiens GN CALM1 PE 1 SV 2	Regular	5232.7	0	16837.7	38	5	23	38.26	221336	178607	70669	40.0089	0.6737	Green
7802	P61978	HNRPK_HUMAN	Heterogeneous nuclear ribonucleoprotein K OS Homo sapiens GN HNRNPK PE 1 SV 1	Regular	5231.34	0	51261.5	102	15	38	43.84	385274	111403	121186	24.9549	1.2792	Green
14887	P09651	ROA1_HUMAN	Heterogeneous nuclear ribonucleoprotein A1 OS Homo sapiens GN HNRNPA1 PE 1 SV 5	Regular	5200.37	0	38860.8	78	11	29	36.83	487718	215751	92468	48.3294	1.8781	Green
5234	P13639	EF2_HUMAN	Elongation factor 2 OS Homo sapiens GN EEF2 PE 1 SV 4	Regular	5145.37	0	96307.8	223	38	69	48.6	1257165	213044	253028	47.723	4.5961	Green	18406
17238	Q15185	TEBP_HUMAN	Prostaglandin E synthase 3 OS Homo sapiens GN PTGES3 PE 1 SV 1	Regular	5139.64	0	18982.6	41	5	15	43.13	288430	243187	69466	54.4752	1.0341	Green
950	P27695	APEX1_HUMAN	DNA apurinic or apyrimidinic site lyase OS Homo sapiens GN APEX1 PE 1 SV 2	Regular	5107.92	0	35953.7	65	11	21	45.6	234781	104548	78415	23.4193	0.842	Green
14712	P05387	RLA2_HUMAN	60S acidic ribosomal protein P2 OS Homo sapiens GN RPLP2 PE 1 SV 1	Regular	5060.39	0	11665	29	4	9	62.61	134888	117442	45105	26.3076	0.3069	Green
10297	P40925	MDHC_HUMAN	Malate dehydrogenase cytoplasmic OS Homo sapiens GN MDH1 PE 1 SV 4	Regular	4907.33	0	36654.3	70	13	34	42.81	435871	170479	87260	38.1882	1.3998	Green
4	Q04917	1433F_HUMAN	14 3 3 protein eta OS Homo sapiens GN YWHAH PE 1 SV 4	Regular	4772.17	0	28389.9	33	5	27	19.51	409626	14737.2	103974	3.3012	0.0937	Green	2 5 8 7 3
7512	P62805	H4_HUMAN	Histone H4 OS Homo sapiens GN HIST1H4A PE 1 SV 2	Regular	4732.6	0	11367.4	32	6	11	57.28	178060	112212	40166	25.1361	0.2857	Green
753	Q92688	AN32B_HUMAN	Acidic leucine rich nuclear phosphoprotein 32 family member B OS Homo sapiens GN ANP32B PE 1 SV 1	Regular	4720.61	0	28958.8	40	6	14	26.69	160014	63552.8	33496	14.2362	0.4123	Green	752
7784	Q9UK76	HN1_HUMAN	Hematological and neurological expressed 1 protein OS Homo sapiens GN HN1 PE 1 SV 3	Regular	4717.41	0	16014.5	33	6	12	68.83	121824	62150	35203	13.9219	0.223	Green
15076	P08865	RSSA_HUMAN	40S ribosomal protein SA OS Homo sapiens GN RPSA PE 1 SV 4	Regular	4689.26	0	32968.2	36	5	25	28.81	136065	104599	47223	23.4307	0.7725	Green
17275	P55072	TERA_HUMAN	Transitional endoplasmic reticulum ATPase OS Homo sapiens GN VCP PE 1 SV 4	Regular	4642.44	0	90006.3	170	28	69	43.67	564024	122616	141441	27.4666	2.4722	Green	11792 942
14888	P22626	ROA2_HUMAN	Heterogeneous nuclear ribonucleoproteins A2 B1 OS Homo sapiens GN HNRNPA2B1 PE 1 SV 2	Regular	4519.84	0	37486.8	83	18	29	43.34	511123	200513	102767	44.916	1.6838	Green
8130	Q14240	IF4A2_HUMAN	Eukaryotic initiation factor 4A II OS Homo sapiens GN EIF4A2 PE 1 SV 2	Regular	4263.54	0	46630.5	74	16	50	36.12	361068	16790.4	80964	3.7611	0.1754	Green	8987 31217 8129 8131
13668	Q06830	PRDX1_HUMAN	Peroxiredoxin 1 OS Homo sapiens GN PRDX1 PE 1 SV 1	Regular	4139.47	0	22338.5	48	9	18	52.76	328306	156460	59400	35.0479	0.7829	Green	13669
17204	P50990	TCPQ_HUMAN	T complex protein 1 subunit theta OS Homo sapiens GN CCT8 PE 1 SV 4	Regular	4049.95	0	60191	138	28	52	56.02	547682	118497	124014	26.544	1.5977	Green
1029	P84077	ARF1_HUMAN	ADP ribosylation factor 1 OS Homo sapiens GN ARF1 PE 1 SV 2	Regular	3821.34	0	20753.8	39	8	14	49.72	151878	79114	30229	17.722	0.3678	Green	1030
1030	P61204	ARF3_HUMAN	ADP ribosylation factor 3 OS Homo sapiens GN ARF3 PE 1 SV 2	Regular	3821.34	0	20657.8	39	8	14	49.72	151878	0	30229			Green	1029
5307	P41567	EIF1_HUMAN	Eukaryotic translation initiation factor 1 OS Homo sapiens GN EIF1 PE 1 SV 1	Regular	3691.4	0	12846.6	11	1	9	14.16	19050	57150	6011	12.8019	0.1645	Green
6753	P63244	GBLP_HUMAN	Guanine nucleotide binding protein subunit beta 2 like 1 OS Homo sapiens GN GNB2L1 PE 1 SV 3	Regular	3656.72	0	35533	62	12	27	49.84	229307	94590	45160	21.1887	0.7529	Green
17073	Q9NY65	TBA8_HUMAN	Tubulin alpha 8 chain OS Homo sapiens GN TUBA8 PE 1 SV 1	Regular	3646.23	0	50778	60	13	34	32.74	476723	32234.2	121893	7.2206	0.3666	Green	17069 17068 17067 17066
15742	Q01105	SET_HUMAN	Protein SET OS Homo sapiens GN SET PE 1 SV 3	Regular	3535.06	0	33488.9	42	6	17	25.52	258950	136501	66473	30.577	1.024	Green
15046	P46782	RS5_HUMAN	40S ribosomal protein S5 OS Homo sapiens GN RPS5 PE 1 SV 4	Regular	3520.06	0	23047.5	22	3	16	16.18	49119	50541	16202	11.3215	0.2609	Green
13918	P06454	PTMA_HUMAN	Prothymosin alpha OS Homo sapiens GN PTMA PE 1 SV 2	Regular	3467.54	0	12203	27	3	10	21.62	111503	110630	40318	24.7817	0.3024	Green
9507	Q6ZMR3	LDH6A_HUMAN	L lactate dehydrogenase A like 6A OS Homo sapiens GN LDHAL6A PE 2 SV 1	Regular	3450.59	0	36849.6	25	5	24	14.16	473799	98267.8	110057	22.0125	0.8112	Green	9510 9509
11582	P55209	NP1L1_HUMAN	Nucleosome assembly protein 1 like 1 OS Homo sapiens GN NAP1L1 PE 1 SV 1	Regular	3279.28	0	45659.3	38	5	25	14.58	139816	106388	40560	23.8315	1.0881	Green	11585
7901	P04792	HSPB1_HUMAN	Heat shock protein beta 1 OS Homo sapiens GN HSPB1 PE 1 SV 2	Regular	3188.38	0	22839.6	32	7	15	46.34	142664	95440	37456	21.3791	0.4883	Green
15042	P23396	RS3_HUMAN	40S ribosomal protein S3 OS Homo sapiens GN RPS3 PE 1 SV 2	Regular	3168.95	0	26859.4	39	8	26	32.92	156445	86793	29612	19.4421	0.5222	Green	30837
12558	Q9UQ80	PA2G4_HUMAN	Proliferation associated protein 2G4 OS Homo sapiens GN PA2G4 PE 1 SV 3	Regular	3087.59	0	44129.1	55	16	32	50	246039	92644	46872	20.7528	0.9158	Green
17197	P78371	TCPB_HUMAN	T complex protein 1 subunit beta OS Homo sapiens GN CCT2 PE 1 SV 4	Regular	3032.47	0	57830.5	113	22	47	44.86	378200	114843	78571	25.7254	1.4877	Green
18462	P61088	UBE2N_HUMAN	Ubiquitin conjugating enzyme E2 N OS Homo sapiens GN UBE2N PE 1 SV 1	Regular	3005.55	0	17194.9	23	7	13	49.34	84019	47151	17914	10.5621	0.1816	Green
12719	Q15365	PCBP1_HUMAN	Poly rC binding protein 1 OS Homo sapiens GN PCBP1 PE 1 SV 2	Regular	2985.53	0	38011.1	41	9	24	41.29	216286	115595	42866	25.8939	0.9843	Green	12720 12721
6837	P50395	GDIB_HUMAN	Rab GDP dissociation inhibitor beta OS Homo sapiens GN GDI2 PE 1 SV 2	Regular	2975.34	0	51119.6	78	16	42	43.82	296662	80816	59470	18.1032	0.9254	Green	6836
13527	P23284	PPIB_HUMAN	Peptidyl prolyl cis trans isomerase B OS Homo sapiens GN PPIB PE 1 SV 2	Regular	2786.52	0	23799.6	51	9	21	39.35	397306	83289	63509	18.6572	0.444	Green	13526
6627	P06744	G6PI_HUMAN	Glucose 6 phosphate isomerase OS Homo sapiens GN GPI PE 1 SV 4	Regular	2750.67	0	63375.4	83	16	40	31.18	456946	150592	94883	33.7334	2.1379	Green	16439
6838	P52565	GDIR1_HUMAN	Rho GDP dissociation inhibitor 1 OS Homo sapiens GN ARHGDIA PE 1 SV 3	Regular	2726.87	0	23264.2	26	5	17	25.49	90101	80469	29391	18.0255	0.4193	Green
13342	P13796	PLSL_HUMAN	Plastin 2 OS Homo sapiens GN LCP1 PE 1 SV 6	Regular	2612.19	0	70858.8	97	23	54	40.99	361806	92316	85034	20.6793	1.4653	Green
5094	P33316	DUT_HUMAN	Deoxyuridine 5 triphosphate nucleotidohydrolase mitochondrial OS Homo sapiens GN DUT PE 1 SV 4	Regular	2551.63	0	26848.4	28	6	18	28.57	91677	67318	31972	15.0796	0.4049	Green
8141	Q9GZV4	IF5A2_HUMAN	Eukaryotic translation initiation factor 5A 2 OS Homo sapiens GN EIF5A2 PE 1 SV 3	Regular	2508.12	0	17135.4	39	5	14	30.07	139179	72312.1	36149	16.1983	0.2776	Green	8142
16737	P61956	SUMO2_HUMAN	Small ubiquitin related modifier 2 OS Homo sapiens GN SUMO2 PE 1 SV 3	Regular	2479.96	0	10928.3	10	1	5	12.63	50839	152517	4614	34.1646	0.3734	Green
17200	P49368	TCPG_HUMAN	T complex protein 1 subunit gamma OS Homo sapiens GN CCT3 PE 1 SV 4	Regular	2343.3	0	61104.3	75	20	48	45.14	285914	100013	71532	22.4034	1.3689	Green
15026	P39019	RS19_HUMAN	40S ribosomal protein S19 OS Homo sapiens GN RPS19 PE 1 SV 2	Regular	2326.71	0	16060.5	27	6	17	32.41	94796	62945	19842	14.1	0.2265	Green
12720	Q15366	PCBP2_HUMAN	Poly rC binding protein 2 OS Homo sapiens GN PCBP2 PE 1 SV 1	Regular	2310.32	0	38979.4	31	7	24	22.47	126437	61125	23785	13.6923	0.5337	Green	12719 12721
15037	P62857	RS28_HUMAN	40S ribosomal protein S28 OS Homo sapiens GN RPS28 PE 1 SV 1	Regular	2280.34	0	7898.07	12	2	6	30.43	44488	66732	10846	14.9483	0.1181	Green
663	P09972	ALDOC_HUMAN	Fructose bisphosphate aldolase C OS Homo sapiens GN ALDOC PE 1 SV 2	Regular	2268.61	0	39855.1	38	8	33	24.18	226997	93987.6	79188	21.0537	0.8391	Green	661
13814	P28066	PSA5_HUMAN	Proteasome subunit alpha type 5 OS Homo sapiens GN PSMA5 PE 1 SV 3	Regular	2264.62	0	26582.2	29	4	16	26.14	70201	64615	24371	14.4741	0.3848	Green
7508	Q71DI3	H32_HUMAN	Histone H3 2 OS Homo sapiens GN HIST2H3A PE 1 SV 3	Regular	2223.38	0	15445.1	30	5	12	26.47	121969	80887	29575	18.1191	0.2799	Green	7510
6345	Q02790	FKBP4_HUMAN	Peptidyl prolyl cis trans isomerase FKBP4 OS Homo sapiens GN FKBP4 PE 1 SV 3	Regular	2206.9	0	52089.8	67	15	40	44.44	222640	98867	53001	22.1467	1.1536	Green
17035	P37837	TALDO_HUMAN	Transaldolase OS Homo sapiens GN TALDO1 PE 1 SV 2	Regular	2198.87	0	37711.3	39	10	29	30.27	166905	88692	29757	19.8675	0.7492	Green
5229	P24534	EF1B_HUMAN	Elongation factor 1 beta OS Homo sapiens GN EEF1B2 PE 1 SV 3	Regular	2190.97	0	24934.8	21	4	19	24.89	76644	69204	11145	15.5021	0.3865	Green
18441	P22314	UBA1_HUMAN	Ubiquitin like modifier activating enzyme 1 OS Homo sapiens GN UBA1 PE 1 SV 3	Regular	2185.9	0	118933	100	19	68	24.76	304465	100154	94885	22.435	2.6683	Green
7800	Q14103	HNRPD_HUMAN	Heterogeneous nuclear ribonucleoprotein D0 OS Homo sapiens GN HNRNPD PE 1 SV 1	Regular	2165.5	0	38605.3	31	5	24	14.93	124908	112823	29887	25.273	0.9757	Green
17494	P29401	TKT_HUMAN	Transketolase OS Homo sapiens GN TKT PE 1 SV 3	Regular	2155.02	0	68562.1	64	14	42	31.62	239663	91741	64553	20.5505	1.409	Green
7793	P31943	HNRH1_HUMAN	Heterogeneous nuclear ribonucleoprotein H OS Homo sapiens GN HNRNPH1 PE 1 SV 4	Regular	2141.85	0	49514.7	53	12	27	29.84	121079	57540.9	38522	12.8895	0.6382	Green	7801
13981	P31939	PUR9_HUMAN	Bifunctional purine biosynthesis protein PURH OS Homo sapiens GN ATIC PE 1 SV 3	Regular	2122.82	0	65129.2	69	17	55	34.12	216300	57542	47550	12.8897	0.8395	Green
10632	P26038	MOES_HUMAN	Moesin OS Homo sapiens GN MSN PE 1 SV 3	Regular	2114.83	0	67934.2	112	25	63	41.42	580238	155393	94416	34.8088	2.3647	Green	5669 14158
12929	P30086	PEBP1_HUMAN	Phosphatidylethanolamine binding protein 1 OS Homo sapiens GN PEBP1 PE 1 SV 3	Regular	2112.57	0	21170.9	28	6	13	57.75	109787	68100	22637	15.2548	0.323	Green
17196	P17987	TCPA_HUMAN	T complex protein 1 subunit alpha OS Homo sapiens GN TCP1 PE 1 SV 1	Regular	2055.68	0	60856.9	76	16	46	36.87	259431	76963	62876	17.2401	1.0492	Green
5232	P26641	EF1G_HUMAN	Elongation factor 1 gamma OS Homo sapiens GN EEF1G PE 1 SV 3	Regular	2049.35	0	50461	69	13	37	35.24	268651	102501	61501	22.9608	1.1586	Green
10398	P31153	METK2_HUMAN	S adenosylmethionine synthase isoform type 2 OS Homo sapiens GN MAT2A PE 1 SV 1	Regular	2031.79	0	44002.9	52	10	33	28.86	157514	90614	53848	20.298	0.8932	Green	10397
13813	P25789	PSA4_HUMAN	Proteasome subunit alpha type 4 OS Homo sapiens GN PSMA4 PE 1 SV 1	Regular	1975.56	0	29769	39	9	25	41	81754	32772	27971	7.3411	0.2185	Green
14679	P62888	RL30_HUMAN	60S ribosomal protein L30 OS Homo sapiens GN RPL30 PE 1 SV 2	Regular	1969.57	0	12955.2	32	6	7	66.09	62101	37576	22953	8.4172	0.109	Green
8440	Q15181	IPYR_HUMAN	Inorganic pyrophosphatase OS Homo sapiens GN PPA1 PE 1 SV 2	Regular	1937.29	0	33116.3	45	11	26	52.94	150909	57831	39438	12.9545	0.429	Green
878	P07355	ANXA2_HUMAN	Annexin A2 OS Homo sapiens GN ANXA2 PE 1 SV 2	Regular	1910.71	0	38832.2	48	17	32	45.43	143311	48289	39989	10.817	0.42	Green	881
19126	P12956	XRCC6_HUMAN	X ray repair cross complementing protein 6 OS Homo sapiens GN XRCC6 PE 1 SV 2	Regular	1882.98	0	70128.3	65	15	56	27.75	287880	151402	58644	33.9149	2.3784	Green
7807	Q00839	HNRPU_HUMAN	Heterogeneous nuclear ribonucleoprotein U OS Homo sapiens GN HNRNPU PE 1 SV 6	Regular	1868.93	0	91325.9	77	17	55	24.24	515892	200394	102568	44.8893	4.0996	Green
7510	Q6NXT2	H3C_HUMAN	Histone H3 3C OS Homo sapiens GN H3F3C PE 1 SV 3	Regular	1862.82	0	15327.8	24	4	11	21.48	98592	0	23943			Green	7508
15022	P62249	RS16_HUMAN	40S ribosomal protein S16 OS Homo sapiens GN RPS16 PE 1 SV 2	Regular	1810.74	0	16559.4	9	2	18	15.07	36982	55473	4476	12.4263	0.2058	Green
9184	P30613	KPYR_HUMAN	Pyruvate kinase isozymes R L OS Homo sapiens GN PKLR PE 1 SV 2	Regular	1796.29	0	62229.5	30	8	47	8.71	317328	4957.54	92968	1.1105	0.0691	Green	9183
16650	P31948	STIP1_HUMAN	Stress induced phosphoprotein 1 OS Homo sapiens GN STIP1 PE 1 SV 1	Regular	1678.21	0	63266.7	61	18	64	35.91	286320	80380	70451	18.0056	1.1392	Green
17198	P50991	TCPD_HUMAN	T complex protein 1 subunit delta OS Homo sapiens GN CCT4 PE 1 SV 4	Regular	1656.72	0	58437.6	65	15	42	34.32	232408	94098	62104	21.0785	1.2318	Green
17208	P40227	TCPZ_HUMAN	T complex protein 1 subunit zeta OS Homo sapiens GN CCT6A PE 1 SV 3	Regular	1638.41	0	58480.5	52	16	41	30.7	261851	82374	51012	18.4522	1.0791	Green	17207
574	O95433	AHSA1_HUMAN	Activator of 90 kDa heat shock protein ATPase homolog 1 OS Homo sapiens GN AHSA1 PE 1 SV 1	Regular	1617.82	0	38445.5	32	9	29	27.22	106473	53096	21561	11.8938	0.4573	Green
7801	P52597	HNRPF_HUMAN	Heterogeneous nuclear ribonucleoprotein F OS Homo sapiens GN HNRNPF PE 1 SV 3	Regular	1574.22	0	46014.1	31	6	26	15.66	77336	16059.1	21280	3.5973	0.1655	Green	7793
7896	P34932	HSP74_HUMAN	Heat shock 70 kDa protein 4 OS Homo sapiens GN HSPA4 PE 1 SV 4	Regular	1573.86	0	95186.5	74	17	74	23.21	216831	59867	55231	13.4105	1.2765	Green	7872 7860
18945	O75083	WDR1_HUMAN	WD repeat containing protein 1 OS Homo sapiens GN WDR1 PE 1 SV 4	Regular	1489.92	0	66877.9	55	12	43	31.52	213108	114287	43098	25.6009	1.7121	Green
18431	P68036	UB2L3_HUMAN	Ubiquitin conjugating enzyme E2 L3 OS Homo sapiens GN UBE2L3 PE 1 SV 1	Regular	1488.61	0	18032.7	18	5	12	38.96	92809	38058	10281	8.5252	0.1537	Green
12879	P30101	PDIA3_HUMAN	Protein disulfide isomerase A3 OS Homo sapiens GN PDIA3 PE 1 SV 4	Regular	1482.06	0	57181.6	54	15	49	34.06	221671	71705	49182	16.0623	0.9185	Green
15049	P62241	RS8_HUMAN	40S ribosomal protein S8 OS Homo sapiens GN RPS8 PE 1 SV 2	Regular	1470.05	0	24490.3	31	8	16	45.19	112733	64167	25402	14.3738	0.352	Green
17201	Q99832	TCPH_HUMAN	T complex protein 1 subunit eta OS Homo sapiens GN CCT7 PE 1 SV 2	Regular	1446.57	0	59880	52	13	43	27.81	190833	84995	49180	19.0393	1.1401	Green
17076	Q9H4B7	TBB1_HUMAN	Tubulin beta 1 chain OS Homo sapiens GN TUBB1 PE 1 SV 1	Regular	1395.58	0	50897.3	25	5	31	9.98	82019	4844.95	34494	1.0853	0.0552	Green	17082 17081
5439	P14625	ENPL_HUMAN	Endoplasmin OS Homo sapiens GN HSP90B1 PE 1 SV 1	Regular	1383.86	0	92754.2	37	10	82	12.33	203204	36984	65859	8.2846	0.7684	Green	7516 7877 7518 7876
13864	Q06323	PSME1_HUMAN	Proteasome activator complex subunit 1 OS Homo sapiens GN PSME1 PE 1 SV 1	Regular	1359.01	0	28894.2	32	9	26	33.73	149663	87051	28289	19.4999	0.5634	Green
14710	P05388	RLA0_HUMAN	60S acidic ribosomal protein P0 OS Homo sapiens GN RPLP0 PE 1 SV 1	Regular	1358.18	0	34444.7	29	8	20	31.23	87304	57856	18437	12.9601	0.4464	Green
3371	O00299	CLIC1_HUMAN	Chloride intracellular channel protein 1 OS Homo sapiens GN CLIC1 PE 1 SV 4	Regular	1350.69	0	27264.9	20	5	20	27.39	63506	43309	15769	9.7014	0.2645	Green
12721	P57721	PCBP3_HUMAN	Poly rC binding protein 3 OS Homo sapiens GN PCBP3 PE 1 SV 2	Regular	1349.96	0	39750.5	18	4	25	11.32	65312	0	12333			Green	12719 12720
7750	P26583	HMGB2_HUMAN	High mobility group protein B2 OS Homo sapiens GN HMGB2 PE 1 SV 2	Regular	1301.85	0	24204.9	29	6	17	28.23	99929	55407	19465	12.4115	0.3004	Green
15048	P62081	RS7_HUMAN	40S ribosomal protein S7 OS Homo sapiens GN RPS7 PE 1 SV 1	Regular	1288.14	0	22126.9	16	5	21	29.38	52156	46370	8017	10.3871	0.2298	Green
15154	P62304	RUXE_HUMAN	Small nuclear ribonucleoprotein E OS Homo sapiens GN SNRPE PE 1 SV 1	Regular	1265.95	0	10860.7	7	2	4	25	23498	35247	3761	7.8955	0.0858	Green
6836	P31150	GDIA_HUMAN	Rab GDP dissociation inhibitor alpha OS Homo sapiens GN GDI1 PE 1 SV 2	Regular	1250.47	0	51210.1	27	8	35	24.83	88192	5040.55	24752	1.1291	0.0578	Green	6837
18452	P63279	UBC9_HUMAN	SUMO conjugating enzyme UBC9 OS Homo sapiens GN UBE2I PE 1 SV 1	Regular	1228.99	0	18235	24	6	13	36.71	67452	45000	21194	10.0802	0.1838	Green
4727	Q00796	DHSO_HUMAN	Sorbitol dehydrogenase OS Homo sapiens GN SORD PE 1 SV 4	Regular	1213.09	0	38951.9	20	5	32	18.49	42620	33495	14974	7.5031	0.2923	Green
2987	P61604	CH10_HUMAN	10 kDa heat shock protein mitochondrial OS Homo sapiens GN HSPE1 PE 1 SV 2	Regular	1211.41	0	10931.7	9	3	12	30.39	26518	26518	4909	5.9402	0.0649	Green
11792	P19338	NUCL_HUMAN	Nucleolin OS Homo sapiens GN NCL PE 1 SV 3	Regular	1207.39	0	76671.5	71	15	59	15.63	374112	134557	86479	30.1415	2.311	Green	17275 942
4986	Q16555	DPYL2_HUMAN	Dihydropyrimidinase related protein 2 OS Homo sapiens GN DPYSL2 PE 1 SV 1	Regular	1149.21	0	62749.9	61	13	43	32.17	161200	60637	47178	13.583	0.8523	Green
8142	Q6IS14	IF5AL_HUMAN	Eukaryotic translation initiation factor 5A 1 like OS Homo sapiens GN EIF5AL1 PE 1 SV 2	Regular	1128.09	0	17001.3	33	4	13	24.68	136637	73289.9	25869	16.4173	0.2791	Green	8141
13817	O14818	PSA7_HUMAN	Proteasome subunit alpha type 7 OS Homo sapiens GN PSMA7 PE 1 SV 1	Regular	1107.6	0	28058	22	9	23	38.31	121257	52849	13927	11.8385	0.3322	Green
15015	P46783	RS10_HUMAN	40S ribosomal protein S10 OS Homo sapiens GN RPS10 PE 1 SV 1	Regular	1105.14	0	18897.8	16	4	18	23.64	33066	27784	10565	6.2238	0.1176	Green
881	P08758	ANXA5_HUMAN	Annexin A5 OS Homo sapiens GN ANXA5 PE 1 SV 2	Regular	1102.95	0	35993.9	36	11	29	36.56	140932	59800	28409	13.3955	0.4822	Green	878
14701	P36578	RL4_HUMAN	60S ribosomal protein L4 OS Homo sapiens GN RPL4 PE 1 SV 5	Regular	1077.69	0	47982.5	35	9	34	30.21	92596	46833	17983	10.4908	0.5034	Green
18362	O43396	TXNL1_HUMAN	Thioredoxin like protein 1 OS Homo sapiens GN TXNL1 PE 1 SV 3	Regular	1050.86	0	32650.6	15	5	21	31.14	33680	24763	9827	5.547	0.1811	Green
145	P52209	6PGD_HUMAN	6 phosphogluconate dehydrogenase decarboxylating OS Homo sapiens GN PGD PE 1 SV 3	Regular	1036.81	0	53653.3	28	9	36	26.71	116538	67042	26826	15.0178	0.8058	Green
15024	P08708	RS17_HUMAN	40S ribosomal protein S17 OS Homo sapiens GN RPS17 PE 1 SV 2	Regular	1017.41	0	15607.2	10	2	12	32.59	17897	26845.5	9673	6.0135	0.0939	Green
5669	P15311	EZRI_HUMAN	Ezrin OS Homo sapiens GN EZR PE 1 SV 4	Regular	999.88	0	69527	68	19	74	24.57	304939	43070.8	65230	9.6481	0.6708	Green	10632 14158
14304	P49792	RBP2_HUMAN	E3 SUMO protein ligase RanBP2 OS Homo sapiens GN RANBP2 PE 1 SV 2	Regular	997.98	0	362591	57	26	264	7.2	236642	15270	69597	3.4206	1.2403	Green	14501 14498 13526
13815	P60900	PSA6_HUMAN	Proteasome subunit alpha type 6 OS Homo sapiens GN PSMA6 PE 1 SV 1	Regular	991.741	0	27855.7	28	6	20	21.14	88028	55643	27578	12.4643	0.3472	Green
664	P15121	ALDR_HUMAN	Aldose reductase OS Homo sapiens GN AKR1B1 PE 1 SV 3	Regular	976.679	0	36252.6	31	9	22	25.32	114395	52978	15165	11.8674	0.4302	Green
5163	O43491	E41L2_HUMAN	Band 4 1 like protein 2 OS Homo sapiens GN EPB41L2 PE 1 SV 1	Regular	960.557	0	113101	68	22	108	22.49	194513	51349	52357	11.5025	1.3009	Green	38128
8335	P12268	IMDH2_HUMAN	Inosine 5 monophosphate dehydrogenase 2 OS Homo sapiens GN IMPDH2 PE 1 SV 2	Regular	958.914	0	56261.3	70	16	41	39.11	240599	94955	49993	21.2704	1.1967	Green
8131	P38919	IF4A3_HUMAN	Eukaryotic initiation factor 4A III OS Homo sapiens GN EIF4A3 PE 1 SV 4	Regular	931.282	0	47156.3	35	9	48	19.46	111289	17337	26884	3.8836	0.1831	Green	8130 8129
14707	P62917	RL8_HUMAN	60S ribosomal protein L8 OS Homo sapiens GN RPL8 PE 1 SV 2	Regular	930.169	0	28252.8	23	5	21	16.34	54871	38547	23072	8.6347	0.244	Green
15018	P62277	RS13_HUMAN	40S ribosomal protein S13 OS Homo sapiens GN RPS13 PE 1 SV 2	Regular	859.615	0	17222.3	13	4	13	18.54	38478	34845	10455	7.8055	0.1344	Green
5231	P29692	EF1D_HUMAN	Elongation factor 1 delta OS Homo sapiens GN EEF1D PE 1 SV 5	Regular	858.872	0	31235.9	13	5	26	17.79	84705	59634	14781	13.3583	0.4173	Green	5119
7395	P09211	GSTP1_HUMAN	Glutathione S transferase P OS Homo sapiens GN GSTP1 PE 1 SV 2	Regular	854.646	0	23584	16	4	15	23.33	78390	71259	15180	15.9624	0.3765	Green
16228	P30626	SORCN_HUMAN	Sorcin OS Homo sapiens GN SRI PE 1 SV 1	Regular	854.632	0	21961.6	18	5	19	25.76	38420	29006	8528	6.4975	0.1427	Green
17199	P48643	TCPE_HUMAN	T complex protein 1 subunit epsilon OS Homo sapiens GN CCT5 PE 1 SV 1	Regular	823.473	0	60127.4	50	10	49	24.21	182986	86710	56118	19.4235	1.1679	Green
336	P53396	ACLY_HUMAN	ATP citrate synthase OS Homo sapiens GN ACLY PE 1 SV 3	Regular	804.83	0	121752	76	19	92	19.62	237374	70281	50054	15.7433	1.9168	Green
10974	P60660	MYL6_HUMAN	Myosin light polypeptide 6 OS Homo sapiens GN MYL6 PE 1 SV 2	Regular	796.631	0	17101.2	13	3	14	21.85	56769	49731	11830	11.14	0.1905	Green
11102	P43490	NAMPT_HUMAN	Nicotinamide phosphoribosyltransferase OS Homo sapiens GN NAMPT PE 1 SV 1	Regular	777.047	0	55806.3	43	16	47	33.4	112485	32691	27223	7.323	0.4087	Green
15041	P61247	RS3A_HUMAN	40S ribosomal protein S3a OS Homo sapiens GN RPS3A PE 1 SV 2	Regular	768.548	0	30173.1	19	7	28	21.21	86423	56225	26965	12.5947	0.38	Green
11805	Q8WVJ2	NUDC2_HUMAN	NudC domain containing protein 2 OS Homo sapiens GN NUDCD2 PE 1 SV 1	Regular	764.414	0	17847	6	2	14	11.46	18591	20709	4804	4.6389	0.0828	Green
5108	Q13838	DX39B_HUMAN	Spliceosome RNA helicase DDX39B OS Homo sapiens GN DDX39B PE 1 SV 1	Regular	753.052	0	49447.7	37	8	37	26.17	135077	70032	27524	15.6875	0.7757	Green
14294	Q9Y5S9	RBM8A_HUMAN	RNA binding protein 8A OS Homo sapiens GN RBM8A PE 1 SV 1	Regular	740.548	0	19946.1	11	3	12	15.52	17369	24712.5	4735	5.5357	0.1104	Green
14661	P61313	RL15_HUMAN	60S ribosomal protein L15 OS Homo sapiens GN RPL15 PE 1 SV 2	Regular	739.976	0	24260.2	16	5	15	14.71	37202	29124	11353	6.5239	0.1583	Green
10192	Q9NZL9	MAT2B_HUMAN	Methionine adenosyltransferase 2 subunit beta OS Homo sapiens GN MAT2B PE 1 SV 1	Regular	735.893	0	37894	27	6	30	22.46	59907	41196	20479	9.2281	0.3497	Green
5533	P15170	ERF3A_HUMAN	Eukaryotic peptide chain release factor GTP binding subunit ERF3A OS Homo sapiens GN GSPT1 PE 1 SV 1	Regular	726.213	0	56383.3	17	5	47	13.83	30477	22784	15856	5.1037	0.2878	Green
7805	O60506	HNRPQ_HUMAN	Heterogeneous nuclear ribonucleoprotein Q OS Homo sapiens GN SYNCRIP PE 1 SV 2	Regular	697.895	0	69830.8	50	15	50	22.31	189205	63594.2	59299	14.2454	0.9948	Green	7806
14158	P35241	RADI_HUMAN	Radixin OS Homo sapiens GN RDX PE 1 SV 1	Regular	692.021	0	68678.1	46	12	61	17.5	253977	3634.72	44925	0.8142	0.0559	Green	10632 5669
14434	P35244	RFA3_HUMAN	Replication protein A 14 kDa subunit OS Homo sapiens GN RPA3 PE 1 SV 1	Regular	690.332	0	13682.8	12	4	9	51.24	33648	28644	6873	6.4164	0.0878	Green
15016	P62280	RS11_HUMAN	40S ribosomal protein S11 OS Homo sapiens GN RPS11 PE 1 SV 3	Regular	687.191	0	18601.8	11	4	18	14.56	30431	29627	3301	6.6366	0.1235	Green
15047	P62753	RS6_HUMAN	40S ribosomal protein S6 OS Homo sapiens GN RPS6 PE 1 SV 1	Regular	675.191	0	28851.8	15	3	20	13.25	38275	38275	10977	8.5738	0.2474	Green
15039	P15880	RS2_HUMAN	40S ribosomal protein S2 OS Homo sapiens GN RPS2 PE 1 SV 2	Regular	663.802	0	31609.6	27	7	27	21.16	149440	73308	24773	16.4214	0.5191	Green
6118	P49327	FAS_HUMAN	Fatty acid synthase OS Homo sapiens GN FASN PE 1 SV 3	Regular	659.033	0	276050	171	42	178	21.66	458442	62399	145436	13.9777	3.8585	Green
810	Q99873	ANM1_HUMAN	Protein arginine N methyltransferase 1 OS Homo sapiens GN PRMT1 PE 1 SV 2	Regular	656.567	0	42085.9	36	8	31	23.55	80422	46497	20683	10.4156	0.4383	Green
2086	P27797	CALR_HUMAN	Calreticulin OS Homo sapiens GN CALR PE 1 SV 1	Regular	649.342	0	48312.7	25	5	47	18.71	79208	56261	13399	12.6028	0.6089	Green
10967	P35579	MYH9_HUMAN	Myosin 9 OS Homo sapiens GN MYH9 PE 1 SV 4	Regular	648.871	0	227787	139	38	164	19.49	382517	57121	96353	12.7954	2.9146	Green	10955 10957 10954
7860	Q92598	HS105_HUMAN	Heat shock protein 105 kDa OS Homo sapiens GN HSPH1 PE 1 SV 1	Regular	648.515	0	97777.6	54	14	70	22.73	131242	44466	33220	9.9606	0.9739	Green	7872 7896
1798	P20290	BTF3_HUMAN	Transcription factor BTF3 OS Homo sapiens GN BTF3 PE 1 SV 1	Regular	632.984	0	22225	5	2	14	12.14	11197	16899	3641	3.7855	0.0841	Green
14343	P54727	RD23B_HUMAN	UV excision repair protein RAD23 homolog B OS Homo sapiens GN RAD23B PE 1 SV 1	Regular	600.572	0	43228.3	14	6	20	10.02	26713	19482	11856	4.3641	0.1887	Green
8118	P05198	IF2A_HUMAN	Eukaryotic translation initiation factor 2 subunit 1 OS Homo sapiens GN EIF2S1 PE 1 SV 3	Regular	566.369	0	36397.4	31	10	31	20	82407	25955	13617	5.8141	0.2116	Green
2115	Q01518	CAP1_HUMAN	Adenylyl cyclase associated protein 1 OS Homo sapiens GN CAP1 PE 1 SV 5	Regular	563.118	0	52357.8	25	9	44	21.89	49939	29073	11841	6.5125	0.341	Green
13835	Q9UNM6	PSD13_HUMAN	26S proteasome non ATPase regulatory subunit 13 OS Homo sapiens GN PSMD13 PE 1 SV 2	Regular	560.174	0	43230.7	23	7	33	19.95	67759	41443	20947	9.2835	0.4013	Green
6240	P39748	FEN1_HUMAN	Flap endonuclease 1 OS Homo sapiens GN FEN1 PE 1 SV 1	Regular	555.704	0	42935.2	25	7	26	16.58	37338	27923	17022	6.2549	0.2686	Green
16120	Q7KZF4	SND1_HUMAN	Staphylococcal nuclease domain containing protein 1 OS Homo sapiens GN SND1 PE 1 SV 1	Regular	536.348	0	102681	41	13	83	17.36	104480	41551	28199	9.3076	0.9557	Green
18406	Q15029	U5S1_HUMAN	116 kDa U5 small nuclear ribonucleoprotein component OS Homo sapiens GN EFTUD2 PE 1 SV 1	Regular	534.732	0	110405	29	11	73	10.08	95126	12381	29421	2.7734	0.3062	Green	5234
13886	P26599	PTBP1_HUMAN	Polypyrimidine tract binding protein 1 OS Homo sapiens GN PTBP1 PE 1 SV 1	Regular	532.869	0	57392.5	30	8	34	15.82	81547	54768	24362	12.2683	0.7041	Green
15043	P62701	RS4X_HUMAN	40S ribosomal protein S4 X isoform OS Homo sapiens GN RPS4X PE 1 SV 2	Regular	526.568	0	29825.9	16	6	20	23.95	63541	41569	13219	9.3117	0.2777	Green
13810	P25786	PSA1_HUMAN	Proteasome subunit alpha type 1 OS Homo sapiens GN PSMA1 PE 1 SV 1	Regular	518.474	0	29840.8	27	7	25	22.43	53851	28332	19905	6.3465	0.1894	Green
1864	P11586	C1TC_HUMAN	C 1 tetrahydrofolate synthase cytoplasmic OS Homo sapiens GN MTHFD1 PE 1 SV 3	Regular	514.405	0	102244	58	21	73	17.43	197908	54477	43713	12.2031	1.2477	Green
17207	Q92526	TCPW_HUMAN	T complex protein 1 subunit zeta 2 OS Homo sapiens GN CCT6B PE 1 SV 5	Regular	506.025	0	58391.8	27	8	37	9.81	118061	44066.3	25537	9.8711	0.5764	Green	17208
16521	Q01130	SRSF2_HUMAN	Serine arginine rich splicing factor 2 OS Homo sapiens GN SRSF2 PE 1 SV 4	Regular	505.424	0	25476.4	12	3	18	6.33	60385	76963.5	5613	17.2402	0.4392	Green
19125	P13010	XRCC5_HUMAN	X ray repair cross complementing protein 5 OS Homo sapiens GN XRCC5 PE 1 SV 3	Regular	496.037	0	83275	45	11	62	23.77	131798	60692	30132	13.5953	1.1322	Green
14107	Q15286	RAB35_HUMAN	Ras related protein Rab 35 OS Homo sapiens GN RAB35 PE 1 SV 1	Regular	487.442	0	23310.4	7	2	16	10.95	33978	50967	4461	11.4169	0.2661	Green
7028	P34896	GLYC_HUMAN	Serine hydroxymethyltransferase cytosolic OS Homo sapiens GN SHMT1 PE 1 SV 1	Regular	485.507	0	53653	27	10	40	12.63	59745	26887	19276	6.0228	0.3231	Green
14698	P39023	RL3_HUMAN	60S ribosomal protein L3 OS Homo sapiens GN RPL3 PE 1 SV 2	Regular	484.633	0	46394.1	30	9	35	22.08	63417	34627	15369	7.7566	0.3599	Green
7806	O43390	HNRPR_HUMAN	Heterogeneous nuclear ribonucleoprotein R OS Homo sapiens GN HNRNPR PE 1 SV 1	Regular	480.216	0	71228.3	32	11	51	18.48	128638	39069.8	29981	8.7518	0.6234	Green	7805
13797	P35998	PRS7_HUMAN	26S protease regulatory subunit 7 OS Homo sapiens GN PSMC2 PE 1 SV 3	Regular	472.045	0	49033.1	23	9	37	14.78	55680	28179	15007	6.3122	0.3095	Green
13773	P62333	PRS10_HUMAN	26S protease regulatory subunit 10B OS Homo sapiens GN PSMC6 PE 1 SV 1	Regular	452.809	0	44458.2	13	3	40	6.17	17613	25248	8239	5.6557	0.2514	Green
13861	Q15008	PSMD6_HUMAN	26S proteasome non ATPase regulatory subunit 6 OS Homo sapiens GN PSMD6 PE 1 SV 1	Regular	444.565	0	45816.6	18	7	40	15.68	43823	24934	10875	5.5853	0.2559	Green
12604	Q8NC51	PAIRB_HUMAN	Plasminogen activator inhibitor 1 RNA binding protein OS Homo sapiens GN SERBP1 PE 1 SV 2	Regular	441.224	0	45022.5	24	9	40	18.87	61404	28487	15746	6.3812	0.2873	Green
10264	P49736	MCM2_HUMAN	DNA replication licensing factor MCM2 OS Homo sapiens GN MCM2 PE 1 SV 4	Regular	438.266	0	102581	15	5	76	5.64	55452	26828	21465	6.0096	0.6165	Green
15038	P62273	RS29_HUMAN	40S ribosomal protein S29 OS Homo sapiens GN RPS29 PE 1 SV 2	Regular	431.169	0	6904.89	8	2	5	30.36	17123	21726	4256	4.8667	0.0336	Yellow
8333	Q14974	IMB1_HUMAN	Importin subunit beta 1 OS Homo sapiens GN KPNB1 PE 1 SV 2	Regular	421.048	0	98482	24	7	62	11.64	70912	44842	21488	10.0449	0.9892	Green
3687	P31146	COR1A_HUMAN	Coronin 1A OS Homo sapiens GN CORO1A PE 1 SV 4	Regular	418.947	0	51710.7	43	11	36	20.39	100052	47464	26541	10.6322	0.5498	Green
12673	P09874	PARP1_HUMAN	Poly ADP ribose polymerase 1 OS Homo sapiens GN PARP1 PE 1 SV 4	Regular	405.338	0	113882	34	14	83	11.93	139126	60916	19373	13.6455	1.554	Green
11585	Q99733	NP1L4_HUMAN	Nucleosome assembly protein 1 like 4 OS Homo sapiens GN NAP1L4 PE 1 SV 1	Regular	396.471	0.43	42994.6	13	3	23	6.4	33800	17016.2	7294	3.8117	0.1639	Green	11582
17406	Q86V81	THOC4_HUMAN	THO complex subunit 4 OS Homo sapiens GN ALYREF PE 1 SV 3	Regular	389.854	0.43	26887.9	6	2	18	12.45	20874	31311	5940	7.0138	0.1886	Green
14703	Q02878	RL6_HUMAN	60S ribosomal protein L6 OS Homo sapiens GN RPL6 PE 1 SV 3	Regular	383.818	0.42	32785	20	6	24	11.81	63076	31015	11101	6.9475	0.2278	Green
5318	Q13347	EIF3I_HUMAN	Eukaryotic translation initiation factor 3 subunit I OS Homo sapiens GN EIF3I PE 1 SV 1	Regular	374.531	0.42	36901.1	11	5	29	23.38	50243	33122	8119	7.4195	0.2738	Green
7872	O95757	HS74L_HUMAN	Heat shock 70 kDa protein 4L OS Homo sapiens GN HSPA4L PE 1 SV 3	Regular	373.636	0.42	95539.2	24	12	70	10.49	64743	3395	16915	0.7605	0.0727	Green	7896 7860
8327	P52292	IMA2_HUMAN	Importin subunit alpha 2 OS Homo sapiens GN KPNA2 PE 1 SV 1	Regular	370.949	0.42	58204.2	22	8	36	11.72	80603	33100	14884	7.4146	0.4316	Green	19599 23676 23828 18250 37033 13009 4369 28972 11558 39644 16019 25347 31823 30064
7803	P14866	HNRPL_HUMAN	Heterogeneous nuclear ribonucleoprotein L OS Homo sapiens GN HNRNPL PE 1 SV 2	Regular	356.619	0.42	64760.2	17	6	34	12.9	57120	38201	10411	8.5572	0.5542	Green
1497	O95816	BAG2_HUMAN	BAG family molecular chaperone regulator 2 OS Homo sapiens GN BAG2 PE 1 SV 1	Regular	356.567	0.41	23943.1	13	5	19	23.7	19288	13898	6094	3.1132	0.0745	Yellow
16876	P26640	SYVC_HUMAN	Valine tRNA ligase OS Homo sapiens GN VARS PE 1 SV 4	Regular	352.277	0.41	141731	51	15	90	11.39	83082	26973	21930	6.0421	0.8564	Green
11122	P49321	NASP_HUMAN	Nuclear autoantigenic sperm protein OS Homo sapiens GN NASP PE 1 SV 2	Regular	344.899	0.41	85523	27	8	78	7.23	94996	55893	12988	12.5203	1.0708	Green
13834	O00232	PSD12_HUMAN	26S proteasome non ATPase regulatory subunit 12 OS Homo sapiens GN PSMD12 PE 1 SV 3	Regular	340.555	0.41	53303.7	34	10	38	16.23	64306	20280	25828	4.5428	0.2421	Green
15422	Q9UBE0	SAE1_HUMAN	SUMO activating enzyme subunit 1 OS Homo sapiens GN SAE1 PE 1 SV 1	Regular	339.707	0.41	38906.1	11	5	31	12.14	25359	13344	8756	2.9891	0.1163	Green
13795	P17980	PRS6A_HUMAN	26S protease regulatory subunit 6A OS Homo sapiens GN PSMC3 PE 1 SV 3	Regular	337.961	0.41	49488.8	17	7	41	13.21	41256	27254	8260	6.105	0.3021	Green
729	P28838	AMPL_HUMAN	Cytosol aminopeptidase OS Homo sapiens GN LAP3 PE 1 SV 3	Regular	336.496	0.4	56565.6	27	11	44	22.35	139171	70587	30350	15.8119	0.8944	Yellow
9039	Q12840	KIF5A_HUMAN	Kinesin heavy chain isoform 5A OS Homo sapiens GN KIF5A PE 1 SV 2	Regular	304.278	0.8	118234	30	17	95	12.5	82250	21706	24060	4.8623	0.5749	Green	9040 9051
481	P11766	ADHX_HUMAN	Alcohol dehydrogenase class 3 OS Homo sapiens GN ADH5 PE 1 SV 4	Regular	298.823	0.8	40579.7	11	4	21	15.78	19401	18389	4810	4.1192	0.1672	Yellow
10269	Q14566	MCM6_HUMAN	DNA replication licensing factor MCM6 OS Homo sapiens GN MCM6 PE 1 SV 1	Regular	284.752	0.8	93858.9	36	12	74	11.33	149725	44023	32412	9.8614	0.9256	Green
4743	Q08211	DHX9_HUMAN	ATP dependent RNA helicase A OS Homo sapiens GN DHX9 PE 1 SV 4	Regular	275.707	0.79	142270	52	16	99	12.13	204608	46569	36455	10.4317	1.4841	Yellow
8122	P20042	IF2B_HUMAN	Eukaryotic translation initiation factor 2 subunit 2 OS Homo sapiens GN EIF2S2 PE 1 SV 2	Regular	275.611	0.79	38730.6	12	6	43	8.41	24306	12630	11090	2.8292	0.1096	Green
10954	P35580	MYH10_HUMAN	Myosin 10 OS Homo sapiens GN MYH10 PE 1 SV 3	Regular	273.839	0.79	229969	54	23	164	5.77	193945	33839.7	45184	7.5803	1.7432	Green	10955 10957 10967
6739	Q92538	GBF1_HUMAN	Golgi specific brefeldin A resistance guanine nucleotide exchange factor 1 OS Homo sapiens GN GBF1 P	Regular	270.359	0.78	208499	10	7	133	1.4	201398	3135.99	33484	0.7025	0.1465	Green	7877 7876
7535	Q13442	HAP28_HUMAN	28 kDa heat and acid stable phosphoprotein OS Homo sapiens GN PDAP1 PE 1 SV 1	Regular	269.63	0.78	20630	9	2	19	13.26	9509	15246	5494	3.4152	0.0705	Yellow
4585	Q9NR30	DDX21_HUMAN	Nucleolar RNA helicase 2 OS Homo sapiens GN DDX21 PE 1 SV 5	Regular	253.237	1.16	87857.8	18	8	75	7.54	51629	20664	14240	4.6288	0.4067	Green
7804	P52272	HNRPM_HUMAN	Heterogeneous nuclear ribonucleoprotein M OS Homo sapiens GN HNRNPM PE 1 SV 3	Regular	252.808	1.16	77801.1	26	14	62	8.49	125609	32174	19798	7.2071	0.5607	Green
7799	P07910	HNRPC_HUMAN	Heterogeneous nuclear ribonucleoproteins C1 C2 OS Homo sapiens GN HNRNPC PE 1 SV 4	Regular	241.867	1.15	33727.1	24	8	34	7.52	47364	23718	9018	5.313	0.1792	Yellow	7791
5373	Q9HC35	EMAL4_HUMAN	Echinoderm microtubule associated protein like 4 OS Homo sapiens GN EML4 PE 1 SV 3	Regular	240.253	1.15	110000	27	12	76	7.65	80240	39326	17916	8.8092	0.969	Green
13983	P30520	PURA2_HUMAN	Adenylosuccinate synthetase isozyme 2 OS Homo sapiens GN ADSS PE 1 SV 3	Regular	232.641	1.15	50496.6	8	4	32	7.02	14987	9225	7481	2.0664	0.1043	Yellow
16846	P49591	SYSC_HUMAN	Serine tRNA ligase cytoplasmic OS Homo sapiens GN SARS PE 1 SV 3	Regular	230.359	1.14	59290.6	27	9	45	10.12	71843	33210	16911	7.4392	0.4411	Yellow
3369	Q00610	CLH1_HUMAN	Clathrin heavy chain 1 OS Homo sapiens GN CLTC PE 1 SV 5	Regular	226.207	1.14	193383	43	18	133	8.3	90321	26902	32246	6.0262	1.1654	Green	3370
9051	P33176	KINH_HUMAN	Kinesin 1 heavy chain OS Homo sapiens GN KIF5B PE 1 SV 1	Regular	225.75	1.13	110426	30	17	94	8.1	74088	4012.13	21825	0.8987	0.0992	Green	9039 9040
8427	O00410	IPO5_HUMAN	Importin 5 OS Homo sapiens GN IPO5 PE 1 SV 4	Regular	224.66	1.13	125113	14	5	78	6.56	26436	13620	7137	3.051	0.3817	Yellow
9454	P05455	LA_HUMAN	Lupus La protein OS Homo sapiens GN SSB PE 1 SV 2	Regular	223.907	1.12	47008.2	12	5	46	11.27	54105	38298	6119	8.579	0.4033	Yellow	15173
5140	P00374	DYR_HUMAN	Dihydrofolate reductase OS Homo sapiens GN DHFR PE 1 SV 2	Regular	221.84	1.12	21509.8	8	4	19	21.93	23358	20719	17348	4.6412	0.0998	Red
14369	P46063	RECQ1_HUMAN	ATP dependent DNA helicase Q1 OS Homo sapiens GN RECQL PE 1 SV 3	Regular	221.567	1.12	74484	16	8	52	10.17	42073	23008	8719	5.1539	0.3839	Yellow
2189	P52907	CAZA1_HUMAN	F actin capping protein subunit alpha 1 OS Homo sapiens GN CAPZA1 PE 1 SV 3	Regular	220.083	1.11	33093.9	11	3	21	18.18	13782	13782	6882	3.0872	0.1022	Yellow
10957	Q7Z406	MYH14_HUMAN	Myosin 14 OS Homo sapiens GN MYH14 PE 1 SV 2	Regular	215.856	1.11	228840	60	25	171	7.97	150377	26616	54812	5.9621	1.3644	Green	18629 10955 31191 10954 10967
13977	P22102	PUR2_HUMAN	Trifunctional purine biosynthetic protein adenosine 3 OS Homo sapiens GN GART PE 1 SV 1	Regular	208.945	1.1	109022	29	10	77	7.52	57752	21391	22868	4.7917	0.5224	Green
3493	Q16281	CNGA3_HUMAN	Cyclic nucleotide gated cation channel alpha 3 OS Homo sapiens GN CNGA3 PE 1 SV 2	Regular	203.394	1.1	79237.4	14	7	50	3.89	209786	151869	16097	34.0195	2.6956	Green
8529	Q96CN7	ISOC1_HUMAN	Isochorismatase domain containing protein 1 OS Homo sapiens GN ISOC1 PE 1 SV 3	Regular	202.806	1.09	32521.9	5	3	18	12.75	15757	18451.5	2931	4.1332	0.1344	Yellow
5119	Q8TE73	DYH5_HUMAN	Dynein heavy chain 5 axonemal OS Homo sapiens GN DNAH5 PE 1 SV 3	Regular	197.079	1.09	532843	40	30	386	2.36	198575	28973	55002	6.4901	3.4582	Green	5122 5123 5115 5231
9040	O60282	KIF5C_HUMAN	Kinesin heavy chain isoform 5C OS Homo sapiens GN KIF5C PE 1 SV 1	Regular	191.45	1.44	110065	17	11	97	7.21	102305	72579.4	12627	16.2582	1.7895	Green	9039 9051
9653	P09960	LKHA4_HUMAN	Leukotriene A 4 hydrolase OS Homo sapiens GN LTA4H PE 1 SV 2	Regular	179.846	1.79	69912.7	15	6	54	8.35	104789	24117	17493	5.4023	0.3777	Yellow
8754	Q7RTS7	K2C74_HUMAN	Keratin type II cytoskeletal 74 OS Homo sapiens GN KRT74 PE 1 SV 2	Regular	179.773	1.79	58264.7	22	8	50	9.83	105464	79521.9	11424	17.8133	1.0379	Yellow	8751 8753
18537	P45974	UBP5_HUMAN	Ubiquitin carboxyl terminal hydrolase 5 OS Homo sapiens GN USP5 PE 1 SV 2	Regular	176.829	2.13	96698.9	24	9	62	7.46	42569	20313	12789	4.5502	0.44	Yellow
8318	Q12906	ILF3_HUMAN	Interleukin enhancer binding factor 3 OS Homo sapiens GN ILF3 PE 1 SV 3	Regular	169.244	2.46	95737.7	26	10	57	10.63	100904	46042	23684	10.3137	0.9874	Yellow
13669	P32119	PRDX2_HUMAN	Peroxiredoxin 2 OS Homo sapiens GN PRDX2 PE 1 SV 5	Regular	167.494	2.46	22063	12	4	17	10.61	60333	15187.5	13329	3.4021	0.0751	Green	13668
16651	O94804	STK10_HUMAN	Serine threonine protein kinase 10 OS Homo sapiens GN STK10 PE 1 SV 1	Regular	167.112	2.45	112820	28	15	96	6.4	65818	27737	22634	6.2132	0.701	Yellow	8737
16669	P16949	STMN1_HUMAN	Stathmin OS Homo sapiens GN STMN1 PE 1 SV 3	Regular	163.446	2.78	17302.5	12	5	24	22.82	44282	38147	11461	8.5451	0.1479	Red
943	Q9UJX5	APC4_HUMAN	Anaphase promoting complex subunit 4 OS Homo sapiens GN ANAPC4 PE 1 SV 2	Regular	157.256	3.44	92915	18	6	58	6.93	162179	151421	16583	33.9191	3.1516	Yellow
18542	Q9UHD9	UBQL2_HUMAN	Ubiquilin 2 OS Homo sapiens GN UBQLN2 PE 1 SV 2	Regular	156.873	3.42	65696.3	8	4	25	5.93	12583	10536	6173	2.3601	0.1551	Yellow
14432	P27694	RFA1_HUMAN	Replication protein A 70 kDa DNA binding subunit OS Homo sapiens GN RPA1 PE 1 SV 2	Regular	154.226	3.41	68765.6	11	5	40	8.6	17348	9284	9754	2.0797	0.143	Red
7328	P43250	GRK6_HUMAN	G protein coupled receptor kinase 6 OS Homo sapiens GN GRK6 PE 1 SV 2	Regular	152.287	4.05	67245.7	18	7	48	11.98	25710	17277	10858	3.8701	0.2603	Yellow
12118	O60313	OPA1_HUMAN	Dynamin like 120 kDa protein mitochondrial OS Homo sapiens GN OPA1 PE 1 SV 3	Regular	148.709	4.68	112201	26	12	87	4.38	82985	47261	16641	10.5867	1.1878	Green
10397	Q00266	METK1_HUMAN	S adenosylmethionine synthase isoform type 1 OS Homo sapiens GN MAT1A PE 1 SV 2	Regular	143.76	5.3	44218.3	16	3	29	6.58	39676	18958.2	12487	4.2467	0.1878	Green	10398
10955	P35749	MYH11_HUMAN	Myosin 11 OS Homo sapiens GN MYH11 PE 1 SV 3	Regular	141.195	5.28	228195	36	15	161	4.31	106513	6139.35	35989	1.3752	0.3138	Green	20467 10957 26604 2346 10954 10967
13798	P62195	PRS8_HUMAN	26S protease regulatory subunit 8 OS Homo sapiens GN PSMC5 PE 1 SV 1	Regular	135.79	5.57	45797.2	9	5	33	7.39	11563	5320.5	3880	1.1918	0.0546	Red
942	O95996	APC2_HUMAN	Adenomatous polyposis coli protein 2 OS Homo sapiens GN APC2 PE 1 SV 1	Regular	134.029	5.56	246116	41	15	203	3.86	84734	11146	33850	2.4968	0.6145	Green	11792 17275 948
8428	O95373	IPO7_HUMAN	Importin 7 OS Homo sapiens GN IPO7 PE 1 SV 1	Regular	133.218	5.54	120828	23	7	69	6.36	26214	14027	16605	3.1421	0.3797	Yellow
86	P30153	2AAA_HUMAN	Serine threonine protein phosphatase 2A 65 kDa regulatory subunit A alpha isoform OS Homo sapiens GN	Regular	132.532	5.52	66107.1	17	6	50	5.26	51664	20333	9436	4.5547	0.3011	Yellow
656	P49189	AL9A1_HUMAN	4 trimethylaminobutyraldehyde dehydrogenase OS Homo sapiens GN ALDH9A1 PE 1 SV 3	Regular	131.686	5.5	54714.5	7	3	42	2.43	14121	26118	3782	5.8506	0.3201	Yellow
2991	P10809	CH60_HUMAN	60 kDa heat shock protein mitochondrial OS Homo sapiens GN HSPD1 PE 1 SV 2	Regular	130.109	5.48	61225.9	16	9	53	12.57	49446	26672	16340	5.9747	0.3658	Yellow
7791	O60812	HNRCL_HUMAN	Heterogeneous nuclear ribonucleoprotein C like 1 OS Homo sapiens GN HNRNPCL1 PE 1 SV 1	Regular	130.063	5.47	32199.5	19	7	35	4.1	46143	0	10191			Yellow	7799
16385	Q9HCB6	SPON1_HUMAN	Spondin 1 OS Homo sapiens GN SPON1 PE 1 SV 2	Regular	129.186	5.45	93596.9	12	6	56	3.97	41284	16081.5	9253	3.6023	0.3372	Yellow
9852	Q5S007	LRRK2_HUMAN	Leucine rich repeat serine threonine protein kinase 2 OS Homo sapiens GN LRRK2 PE 1 SV 2	Regular	128.644	5.43	289753	43	19	195	4.71	466496	384262	167122	86.0767	24.941	Green	31440
18786	Q00341	VIGLN_HUMAN	Vigilin OS Homo sapiens GN HDLBP PE 1 SV 2	Regular	126.674	6.6	142083	25	10	116	3.23	98717	46725	19042	10.4667	1.4871	Green
14608	Q9NVN3	RIC8B_HUMAN	Synembryn B OS Homo sapiens GN RIC8B PE 1 SV 2	Regular	126.52	6.58	59623.2	13	5	41	6.73	190702	269386	36267	60.344	3.5979	Red
6032	Q9BQN1	FA83C_HUMAN	Protein FAM83C OS Homo sapiens GN FAM83C PE 1 SV 3	Regular	123.594	6.85	81590.9	9	5	57	3.75	56740	72648	11490	16.2735	1.3278	Yellow
5636	Q9H790	EXO5_HUMAN	Probable exonuclease V OS Homo sapiens GN DEM1 PE 2 SV 1	Regular	122.793	6.83	42158.4	11	7	40	11.53	48815	28512	11175	6.3868	0.2693	Red
198	Q9UDR5	AASS_HUMAN	Alpha aminoadipic semialdehyde synthase mitochondrial OS Homo sapiens GN AASS PE 1 SV 1	Regular	121.224	6.81	102873	20	11	69	6.05	106179	15282	24594	3.4232	0.3522	Red
13833	O00231	PSD11_HUMAN	26S proteasome non ATPase regulatory subunit 11 OS Homo sapiens GN PSMD11 PE 1 SV 3	Regular	120.614	6.79	47749	10	5	38	6.64	43939	18811.5	5718	4.2139	0.2012	Red
11830	P52948	NUP98_HUMAN	Nuclear pore complex protein Nup98 Nup96 OS Homo sapiens GN NUP98 PE 1 SV 4	Regular	120.518	6.77	198720	46	20	105	3.96	96349	36073	29054	8.0805	1.6058	Yellow
16627	P42224	STAT1_HUMAN	Signal transducer and activator of transcription 1 alpha beta OS Homo sapiens GN STAT1 PE 1 SV 2	Regular	118.593	6.75	87905.2	10	3	61	4.93	21755	19598	4969	4.3901	0.3859	Yellow
18692	O75691	UTP20_HUMAN	Small subunit processome component 20 homolog OS Homo sapiens GN UTP20 PE 1 SV 3	Regular	117.884	6.73	321009	31	16	208	2.55	126183	29152	31531	6.5302	2.0963	Green	14021 8551 36711 13020 18114
15888	O60292	SI1L3_HUMAN	Signal induced proliferation associated 1 like protein 3 OS Homo sapiens GN SIPA1L3 PE 1 SV 3	Regular	117.107	6.71	195922	23	15	144	3.59	56340	23013	23250	5.155	1.01	Yellow
11413	Q5T2W1	NHRF3_HUMAN	Na H exchange regulatory cofactor NHE RF3 OS Homo sapiens GN PDZK1 PE 1 SV 2	Regular	116.267	7.25	57414.5	9	4	50	3.47	26236	9225	7362	2.0664	0.1186	Red
12042	Q15646	OASL_HUMAN	2 5 oligoadenylate synthase like protein OS Homo sapiens GN OASL PE 1 SV 2	Regular	115.817	7.23	59739.3	9	4	44	1.36	23968	36705	11949	8.2221	0.4912	Yellow
13114	O14986	PI51B_HUMAN	Phosphatidylinositol 4 phosphate 5 kinase type 1 beta OS Homo sapiens GN PIP5K1B PE 1 SV 2	Regular	115.666	7.21	61264.6	11	5	35	5	33533	29237.8	23267	6.5494	0.4012	Red	13113
10962	Q9Y623	MYH4_HUMAN	Myosin 4 OS Homo sapiens GN MYH4 PE 1 SV 2	Regular	115.374	7.19	224041	58	26	163	6.03	163541	16632.1	51131	3.7257	0.8347	Yellow	10961 10966 10956 10963 10964 10960 10959 10965
14135	Q15276	RABE1_HUMAN	Rab GTPase binding effector protein 1 OS Homo sapiens GN RABEP1 PE 1 SV 2	Regular	113.246	7.99	99689.8	25	19	103	11.83	63653	12734	30189	2.8525	0.2844	Red	19647 10644 1590 24992 18790
19722	Q9BRH9	ZN251_HUMAN	Zinc finger protein 251 OS Homo sapiens GN ZNF251 PE 2 SV 4	Regular	113.192	7.96	77474.3	9	5	62	4.77	25177	15255	5640	3.4172	0.2647	Yellow
13978	O15067	PUR4_HUMAN	Phosphoribosylformylglycinamidine synthase OS Homo sapiens GN PFAS PE 1 SV 4	Regular	112.719	7.94	146388	27	9	95	4.41	58760	20780	16593	4.6548	0.6814	Red	10983
4604	Q86TM3	DDX53_HUMAN	Probable ATP dependent RNA helicase DDX53 OS Homo sapiens GN DDX53 PE 1 SV 3	Regular	111.196	7.92	71553.6	25	8	61	1.74	34659	55527	13380	12.4383	0.89	Red
16501	O76094	SRP72_HUMAN	Signal recognition particle 72 kDa protein OS Homo sapiens GN SRP72 PE 1 SV 3	Regular	110.596	7.89	75176.6	14	7	54	6.56	39915	15586	9982	3.4913	0.2625	Red
18095	Q15643	TRIPB_HUMAN	Thyroid receptor interacting protein 11 OS Homo sapiens GN TRIP11 PE 1 SV 3	Regular	110.192	8.14	228271	40	19	212	2.83	890976	834944	101105	187.032	42.694	Yellow	7565 8780 2770 12812
6299	B1AJZ9	FHAD1_HUMAN	Forkhead associated domain containing protein 1 OS Homo sapiens GN FHAD1 PE 2 SV 2	Regular	108.283	8.65	162760	45	21	172	6.52	103208	17362	25050	3.8892	0.633	Red	21477 4731
13246	Q9Y446	PKP3_HUMAN	Plakophilin 3 OS Homo sapiens GN PKP3 PE 1 SV 1	Regular	106.314	9.14	87538.5	16	7	66	6.65	49241	24948	14863	5.5885	0.4892	Red
18272	Q8N0Z6	TTC5_HUMAN	Tetratricopeptide repeat protein 5 OS Homo sapiens GN TTC5 PE 1 SV 2	Regular	105.802	9.38	49269.8	8	3	32	2.5	7847	3063	4220	0.6861	0.0338	Red
957	Q8IW19	APLF_HUMAN	Aprataxin and PNK like factor OS Homo sapiens GN APLF PE 1 SV 1	Regular	105.438	9.6	57640.2	10	4	43	8.02	76820	71496	7093	16.0155	0.9231	Red
17421	Q9BTF0	THUM2_HUMAN	THUMP domain containing protein 2 OS Homo sapiens GN THUMPD2 PE 2 SV 2	Regular	104.84	9.83	57003.5	12	8	48	10.54	39352	26829	12556	6.0098	0.3426	Red
4564	Q16531	DDB1_HUMAN	DNA damage binding protein 1 OS Homo sapiens GN DDB1 PE 1 SV 1	Regular	104.423	10.06	128223	27	11	84	3.42	58656	15735	18416	3.5247	0.4519	Yellow
18114	O15050	TRNK1_HUMAN	TPR and ankyrin repeat containing protein 1 OS Homo sapiens GN TRANK1 PE 2 SV 4	Regular	104.4	10.03	340556	37	22	256	3.11	145222	33738	36209	7.5575	2.5737	Green	14021 6378 13020 18692 9407
17506	Q9Y490	TLN1_HUMAN	Talin 1 OS Homo sapiens GN TLN1 PE 1 SV 3	Regular	104.079	10	271935	56	22	208	6.53	126776	32040	56216	7.1771	1.9517	Yellow	17507
1268	O14983	AT2A1_HUMAN	Sarcoplasmic endoplasmic reticulum calcium ATPase 1 OS Homo sapiens GN ATP2A1 PE 1 SV 1	Regular	103.775	10.47	111621	22	11	72	6.89	36542	11872	16342	2.6594	0.2968	Red	2345
8751	Q3SY84	K2C71_HUMAN	Keratin type II cytoskeletal 71 OS Homo sapiens GN KRT71 PE 1 SV 3	Regular	103.57	10.44	57804.9	21	12	45	8.99	76443	6676.19	14241	1.4955	0.0864	Red	8754 8753
17183	Q5QJ38	TCHL1_HUMAN	Trichohyalin like protein 1 OS Homo sapiens GN TCHHL1 PE 2 SV 1	Regular	103.372	10.41	99788.5	18	7	77	6.75	92033	45021	29186	10.0849	1.0064	Red
17825	P45379	TNNT2_HUMAN	Troponin T cardiac muscle OS Homo sapiens GN TNNT2 PE 1 SV 3	Regular	103.159	10.38	35923.6	4	2	28	6.38	5605	4104	1868	0.9193	0.033	Red
16053	Q14683	SMC1A_HUMAN	Structural maintenance of chromosomes protein 1A OS Homo sapiens GN SMC1A PE 1 SV 2	Regular	103.116	10.35	143860	15	10	137	6.49	273478	235189	12411	52.6836	7.5791	Yellow
6733	Q9H227	GBA3_HUMAN	Cytosolic beta glucosidase OS Homo sapiens GN GBA3 PE 1 SV 2	Regular	102.888	10.57	54037.9	7	4	32	1.92	14185	8505	7670	1.9052	0.103	Red
11729	Q08J23	NSUN2_HUMAN	tRNA cytosine 34 C 5 methyltransferase OS Homo sapiens GN NSUN2 PE 1 SV 2	Regular	102.401	10.54	87269.3	6	4	70	2.74	12817	9141	3468	2.0476	0.1787	Red
13322	O00469	PLOD2_HUMAN	Procollagen lysine 2 oxoglutarate 5 dioxygenase 2 OS Homo sapiens GN PLOD2 PE 1 SV 2	Regular	102.051	10.75	85427.1	14	8	59	4.61	29726	11885	9300	2.6623	0.2274	Red
12626	Q9NVE7	PANK4_HUMAN	Pantothenate kinase 4 OS Homo sapiens GN PANK4 PE 1 SV 1	Regular	101.851	10.72	86675.4	14	8	65	3.36	26970	10978.5	10752	2.4592	0.2132	Red
18059	Q9BRZ2	TRI56_HUMAN	E3 ubiquitin protein ligase TRIM56 OS Homo sapiens GN TRIM56 PE 1 SV 3	Regular	101.533	10.7	83198.6	17	8	64	4.24	28588	17271	17168	3.8688	0.3219	Yellow
19370	Q56UN5	YSK4_HUMAN	SPS1 STE20 related protein kinase YSK4 OS Homo sapiens GN YSK4 PE 1 SV 1	Regular	101.523	10.67	152077	13	8	123	3.46	25381	6658	10857	1.4914	0.2268	Yellow
15468	Q15020	SART3_HUMAN	Squamous cell carcinoma antigen recognized by T cells 3 OS Homo sapiens GN SART3 PE 1 SV 1	Regular	101.495	10.64	110790	20	11	75	3.12	38774	6792	16300	1.5214	0.1686	Red	36832 10557 33533
8126	O60841	IF2P_HUMAN	Eukaryotic translation initiation factor 5B OS Homo sapiens GN EIF5B PE 1 SV 4	Regular	100.949	10.85	139283	19	9	103	2.95	38320	6110	12385	1.3687	0.1906	Red
12877	P07237	PDIA1_HUMAN	Protein disulfide isomerase OS Homo sapiens GN P4HB PE 1 SV 3	Regular	100.882	10.82	57515.6	16	9	50	8.27	59170	15999	12620	3.5839	0.2061	Red
11197	Q969V3	NCLN_HUMAN	Nicalin OS Homo sapiens GN NCLN PE 1 SV 2	Regular	100.857	10.79	63145.6	13	7	40	4.97	36628	6905	10437	1.5468	0.0977	Yellow
7288	Q4V328	GRAP1_HUMAN	GRIP1 associated protein 1 OS Homo sapiens GN GRIPAP1 PE 1 SV 1	Regular	100.006	10.99	96331.8	17	10	90	5.23	67562	37605	16941	8.4237	0.8115	Red
9734	P42704	LPPRC_HUMAN	Leucine rich PPR motif containing protein mitochondrial OS Homo sapiens GN LRPPRC PE 1 SV 3	Regular	99.9732	10.97	159103	23	13	130	6.6	36900	11631	25450	2.6054	0.4145	Red
4708	P49448	DHE4_HUMAN	Glutamate dehydrogenase 2 mitochondrial OS Homo sapiens GN GLUD2 PE 1 SV 2	Regular	98.8558	11.4	61776.3	15	9	44	7.71	49955	12676.2	9368	2.8395	0.1754	Red	4707
3842	Q9P2I0	CPSF2_HUMAN	Cleavage and polyadenylation specificity factor subunit 2 OS Homo sapiens GN CPSF2 PE 1 SV 2	Regular	98.2649	11.6	89342.3	17	6	65	3.32	39211	23007	17388	5.1537	0.4604	Red
6360	P21333	FLNA_HUMAN	Filamin A OS Homo sapiens GN FLNA PE 1 SV 4	Regular	98.0141	11.57	283477	42	23	176	6.23	85248	18364	30260	4.1136	1.1661	Red	6361
16842	P47897	SYQ_HUMAN	Glutamine tRNA ligase OS Homo sapiens GN QARS PE 1 SV 1	Regular	97.7242	11.99	88711.3	15	6	68	6.32	16290	10586	11249	2.3713	0.2104	Red
5375	Q6ZMW3	EMAL6_HUMAN	Echinoderm microtubule associated protein like 6 OS Homo sapiens GN EML6 PE 2 SV 2	Regular	97.3565	12.18	220409	41	20	169	3.88	99325	37237	26870	8.3413	1.8385	Yellow
12919	Q8NEN9	PDZD8_HUMAN	PDZ domain containing protein 8 OS Homo sapiens GN PDZD8 PE 1 SV 1	Regular	97.3408	12.15	129761	10	4	111	3.12	11245	13138.5	6473	2.9431	0.3819	Red
4752	Q9NSV4	DIAP3_HUMAN	Protein diaphanous homolog 3 OS Homo sapiens GN DIAPH3 PE 1 SV 4	Regular	96.9458	12.34	138238	15	10	104	5.45	31796	9699	10998	2.1726	0.3003	Red
775	Q9UKU9	ANGL2_HUMAN	Angiopoietin related protein 2 OS Homo sapiens GN ANGPTL2 PE 2 SV 1	Regular	96.8006	12.31	57617.8	10	4	42	8.72	121614	118716	24638	26.593	1.5322	Red
12633	Q5JQF8	PAP1M_HUMAN	Polyadenylate binding protein 1 like 2 OS Homo sapiens GN PABPC1L2A PE 1 SV 1	Regular	95.9508	12.72	22970.2	7	3	16	12.5	5972	6864	5832	1.5376	0.0353	Red
6033	Q9H4H8	FA83D_HUMAN	Protein FAM83D OS Homo sapiens GN FAM83D PE 1 SV 3	Regular	95.7444	12.69	64880.8	14	6	48	1.2	99141	24888	15505	5.575	0.3617	Red
13892	O75127	PTCD1_HUMAN	Pentatricopeptide repeat containing protein 1 OS Homo sapiens GN PTCD1 PE 1 SV 2	Regular	94.7851	13.09	79483.2	6	7	60	4.71	35793	8269	9519	1.8523	0.1472	Yellow
12462	O14753	OVOL1_HUMAN	Putative transcription factor Ovo like 1 OS Homo sapiens GN OVOL1 PE 2 SV 3	Regular	94.781	13.05	31171.3	4	2	25	7.87	10023	18411	6378	4.1242	0.1286	Red
394	P12814	ACTN1_HUMAN	Alpha actinin 1 OS Homo sapiens GN ACTN1 PE 1 SV 2	Regular	92.6474	13.66	103628	16	11	76	4.15	58378	7685.8	17005	1.7217	0.1784	Red	397
6788	Q8IWJ2	GCC2_HUMAN	GRIP and coiled coil domain containing protein 2 OS Homo sapiens GN GCC2 PE 1 SV 4	Regular	92.3407	13.63	196993	40	23	203	4.39	130258	39693	43875	8.8914	1.7516	Red
9849	Q32MZ4	LRRF1_HUMAN	Leucine rich repeat flightless interacting protein 1 OS Homo sapiens GN LRRFIP1 PE 1 SV 2	Regular	92.0562	13.59	89880.5	21	7	89	5.32	648278	635340	124897	142.32	12.7917	Red
4580	Q92771	DDX12_HUMAN	Putative ATP dependent RNA helicase DDX12 OS Homo sapiens GN DDX12P PE 5 SV 3	Regular	91.1096	13.77	107374	12	8	80	4.63	26733	7853	7308	1.7591	0.1889	Red
11848	Q969Y0	NXPE3_HUMAN	NXPE family member 3 OS Homo sapiens GN NXPE3 PE 2 SV 1	Regular	90.2607	14.35	64426.9	12	5	38	5.55	24913	14626.5	9083	3.2764	0.2111	Red
12793	O94913	PCF11_HUMAN	Pre mRNA cleavage complex 2 protein Pcf11 OS Homo sapiens GN PCF11 PE 1 SV 3	Regular	90.1982	14.32	173735	29	15	120	2.19	207038	96970	38225	21.7218	3.7738	Yellow
15706	O43175	SERA_HUMAN	D 3 phosphoglycerate dehydrogenase OS Homo sapiens GN PHGDH PE 1 SV 4	Regular	90.0182	14.29	57392	8	4	36	6.38	15952	15012	4650	3.3628	0.193	Red
19808	Q86V71	ZN429_HUMAN	Zinc finger protein 429 OS Homo sapiens GN ZNF429 PE 1 SV 2	Regular	89.7831	14.25	80547.6	9	3	56	2.52	53932	5824.44	7546	1.3047	0.1051	Yellow	20070 19942
9457	P18428	LBP_HUMAN	Lipopolysaccharide binding protein OS Homo sapiens GN LBP PE 1 SV 3	Regular	89.3929	14.42	53554.8	2	2	23	3.95	7461	11191.5	4223	2.507	0.1343	Yellow
1427	Q5T1B0	AXDN1_HUMAN	Axonemal dynein light chain domain containing protein 1 OS Homo sapiens GN AXDND1 PE 1 SV 1	Regular	89.2162	14.39	118711	28	13	106	6.32	44644	7243	19926	1.6225	0.1926	Yellow
3983	Q5TZA2	CROCC_HUMAN	Rootletin OS Homo sapiens GN CROCC PE 1 SV 1	Regular	88.7072	14.55	228923	36	19	219	5.8	75004	28219	26024	6.3212	1.4471	Red
558	Q9HCK5	AGO4_HUMAN	Protein argonaute 4 OS Homo sapiens GN EIF2C4 PE 1 SV 2	Regular	87.3349	15.12	98237.6	10	4	64	5.23	34070	9576	8669	2.1451	0.2107	Red
2770	O15078	CE290_HUMAN	Centrosomal protein of 290 kDa OS Homo sapiens GN CEP290 PE 1 SV 2	Regular	87.1475	15.28	291071	60	39	293	3.31	179450	19886	52207	4.4546	1.2966	Red	7565 18095 8780 2820 12812
8746	P19013	K2C4_HUMAN	Keratin type II cytoskeletal 4 OS Homo sapiens GN KRT4 PE 1 SV 4	Regular	87.0061	15.63	57684.5	8	5	42	9.36	15773	4944	4726	1.1075	0.0639	Red
9781	Q8IUZ0	LRC49_HUMAN	Leucine rich repeat containing protein 49 OS Homo sapiens GN LRRC49 PE 2 SV 2	Regular	86.7223	15.6	79407.5	19	7	50	5.69	118588	16820	30275	3.7678	0.2992	Red
11702	Q9ULB1	NRX1A_HUMAN	Neurexin 1 alpha OS Homo sapiens GN NRXN1 PE 2 SV 1	Regular	86.4111	15.75	164164	27	13	97	3.93	64402	14050	23292	3.1473	0.5167	Red	11703
12621	Q504Q3	PAN2_HUMAN	PAB dependent poly A specific ribonuclease subunit 2 OS Homo sapiens GN PAN2 PE 1 SV 3	Regular	85.425	16.67	136851	24	12	76	6.24	137503	89919	33454	20.1423	2.7565	Red
7603	Q7Z353	HDX_HUMAN	Highly divergent homeobox OS Homo sapiens GN HDX PE 1 SV 1	Regular	85.391	16.63	77890.2	14	7	49	5.51	14521	5222	17035	1.1698	0.0911	Red
2821	P49454	CENPF_HUMAN	Centromere protein F OS Homo sapiens GN CENPF PE 1 SV 2	Regular	85.3724	16.59	371073	58	36	346	3.64	224003	60639	65393	13.5835	5.0404	Red	16055 13944
10959	P12882	MYH1_HUMAN	Myosin 1 OS Homo sapiens GN MYH1 PE 1 SV 3	Regular	84.836	16.74	224115	48	21	162	3.56	156216	8232.69	42680	1.8442	0.4133	Red	10962 10961 10966 10956 10963 10964 10960 10965
10960	Q9UKX2	MYH2_HUMAN	Myosin 2 OS Homo sapiens GN MYH2 PE 1 SV 1	Regular	84.3804	17.44	224071	43	17	162	3.3	129170	13129.2	44179	2.941	0.659	Yellow	10962 10961 10966 10956 10963 10964 10959 10965
6404	Q8TF40	FNIP1_HUMAN	Folliculin interacting protein 1 OS Homo sapiens GN FNIP1 PE 1 SV 3	Regular	84.0392	17.58	132552	10	4	95	2.57	46657	35435	17242	7.9376	1.0521	Yellow
18250	Q96AE7	TTC17_HUMAN	Tetratricopeptide repeat protein 17 OS Homo sapiens GN TTC17 PE 1 SV 1	Regular	83.9369	17.54	130756	35	16	85	4.12	94970	17362	28204	3.8892	0.5085	Red	19599 23676 23828 37033 13009 4369 28972 11558 8327 39644 16019 25347 31823 30064
18553	Q8TF42	UBS3B_HUMAN	Ubiquitin associated and SH3 domain containing protein B OS Homo sapiens GN UBASH3B PE 1 SV 2	Regular	83.8524	17.51	73836.6	12	5	49	6.78	58735	55328	11267	12.3938	0.9151	Red
10857	Q9Y216	MTMR7_HUMAN	Myotubularin related protein 7 OS Homo sapiens GN MTMR7 PE 1 SV 3	Regular	81.663	18.71	76802.3	17	6	56	5.45	26053	15484	13730	3.4685	0.2664	Red
12842	Q53EL6	PDCD4_HUMAN	Programmed cell death protein 4 OS Homo sapiens GN PDCD4 PE 1 SV 2	Regular	81.1997	18.67	52134.5	7	3	40	5.33	18446	13050	7069	2.9233	0.1524	Red
15860	O15357	SHIP2_HUMAN	Phosphatidylinositol 3 4 5 trisphosphate 5 phosphatase 2 OS Homo sapiens GN INPPL1 PE 1 SV 2	Regular	81.1475	18.8	139397	19	11	103	2.86	68209	9208	14815	2.0626	0.2875	Yellow
4245	Q13619	CUL4A_HUMAN	Cullin 4A OS Homo sapiens GN CUL4A PE 1 SV 3	Regular	80.9565	18.76	88193.7	17	7	84	3.03	41577	10884	27565	2.4381	0.215	Red
9769	Q1X8D7	LRC36_HUMAN	Leucine rich repeat containing protein 36 OS Homo sapiens GN LRRC36 PE 2 SV 2	Regular	80.3031	18.72	84335.9	18	8	63	5.44	38969	5574	12458	1.2486	0.1053	Red	13299
10992	B0I1T2	MYO1G_HUMAN	Unconventional myosin Ig OS Homo sapiens GN MYO1G PE 1 SV 2	Regular	80.0727	18.68	117469	15	10	78	4.91	74201	35556.6	13565	7.9649	0.9356	Red	10989
4707	P00367	DHE3_HUMAN	Glutamate dehydrogenase 1 mitochondrial OS Homo sapiens GN GLUD1 PE 1 SV 2	Regular	80.0567	18.64	61740.1	13	9	44	4.12	47426	28348.2	8600	6.3501	0.3921	Red	4708
7161	Q5T848	GP158_HUMAN	Probable G protein coupled receptor 158 OS Homo sapiens GN GPR158 PE 1 SV 1	Regular	79.8575	18.6	136972	15	6	109	5.1	37722	22730	16489	5.0916	0.6974	Red
4755	Q9BTC0	DIDO1_HUMAN	Death inducer obliterator 1 OS Homo sapiens GN DIDO1 PE 1 SV 5	Regular	79.4332	18.91	245584	30	18	192	5.67	53007	11406	23987	2.555	0.6275	Red
17291	Q8IWB6	TEX14_HUMAN	Inactive serine threonine protein kinase TEX14 OS Homo sapiens GN TEX14 PE 1 SV 2	Regular	79.1357	18.87	169213	22	13	123	4.54	83628	28594	35344	6.4052	1.0838	Yellow	8660
8991	Q96Q89	KI20B_HUMAN	Kinesin like protein KIF20B OS Homo sapiens GN KIF20B PE 1 SV 3	Regular	79.0864	18.83	211998	42	24	197	5.22	172391	34142	28609	7.648	1.6214	Yellow
5770	Q05DH4	F16A1_HUMAN	Protein FAM160A1 OS Homo sapiens GN FAM160A1 PE 2 SV 2	Regular	78.9461	19.13	117819	14	5	84	3.75	33355	15699	12282	3.5167	0.4143	Red
18629	O14795	UN13B_HUMAN	Protein unc 13 homolog B OS Homo sapiens GN UNC13B PE 1 SV 2	Regular	78.9436	19.09	182789	22	12	143	4.02	79988	9613.31	19583	2.1534	0.3936	Yellow	10957 31191 18630 18628
2665	O00311	CDC7_HUMAN	Cell division cycle 7 related protein kinase OS Homo sapiens GN CDC7 PE 1 SV 1	Regular	78.6888	19.38	64686.7	9	6	52	9.93	14851	9752	5238	2.1845	0.1413	Red
9148	Q86Z14	KLOTB_HUMAN	Beta klotho OS Homo sapiens GN KLB PE 1 SV 1	Regular	78.5282	19.34	120549	22	11	73	4.89	59114	9813	14459	2.1982	0.265	Red
8987	Q96L93	KI16B_HUMAN	Kinesin like protein KIF16B OS Homo sapiens GN KIF16B PE 1 SV 2	Regular	77.7175	19.8	152582	14	9	143	3.87	55850	19418	14412	4.3497	0.6637	Green	8130 31217 8129
4701	P56937	DHB7_HUMAN	3 keto steroid reductase OS Homo sapiens GN HSD17B7 PE 1 SV 1	Regular	77.0119	19.92	38662.5	5	3	20	7.92	33429	46494	3816	10.4149	0.4027	Red
5625	Q92817	EVPL_HUMAN	Envoplakin OS Homo sapiens GN EVPL PE 1 SV 3	Regular	76.8854	19.88	232916	46	25	210	4.18	200719	67479	37316	15.1157	3.5207	Red	30382 16074
9678	Q8WWI1	LMO7_HUMAN	LIM domain only protein 7 OS Homo sapiens GN LMO7 PE 1 SV 3	Regular	76.8437	19.84	194122	28	16	173	5.11	88897	54981	21183	12.316	2.3908	Red
18683	Q9BVJ6	UT14A_HUMAN	U3 small nucleolar RNA associated protein 14 homolog A OS Homo sapiens GN UTP14A PE 1 SV 1	Regular	76.5525	20.12	88149	15	7	73	1.95	50973	33631.5	8069	7.5336	0.6641	Red
6760	Q8N8V2	GBP7_HUMAN	Guanylate binding protein 7 OS Homo sapiens GN GBP7 PE 2 SV 2	Regular	76.1443	20.87	73140.7	13	7	58	7.21	35976	11735	14479	2.6287	0.1923	Red
11692	Q7Z2Y5	NRK_HUMAN	Nik related protein kinase OS Homo sapiens GN NRK PE 2 SV 2	Regular	75.5794	21.15	179620	17	10	120	3.16	81606	23971	16219	5.3696	0.9645	Yellow
8785	Q7Z3B3	KANL1_HUMAN	KAT8 regulatory NSL complex subunit 1 OS Homo sapiens GN KANSL1 PE 1 SV 2	Regular	75.487	21.1	121823	19	8	78	3.17	48609	31049	13672	6.9551	0.8473	Red
4908	Q96N67	DOCK7_HUMAN	Dedicator of cytokinesis protein 7 OS Homo sapiens GN DOCK7 PE 1 SV 4	Regular	75.321	21.06	244443	42	23	159	6.31	173623	22293.4	32093	4.9938	1.2207	Red	4907
10185	Q6P0Q8	MAST2_HUMAN	Microtubule associated serine threonine protein kinase 2 OS Homo sapiens GN MAST2 PE 1 SV 2	Regular	75.2668	21.02	197691	24	13	134	2.61	36215	10608	30040	2.3762	0.4698	Red	10187 10186
13739	Q6P2Q9	PRP8_HUMAN	Pre mRNA processing splicing factor 8 OS Homo sapiens GN PRPF8 PE 1 SV 2	Regular	75.0718	20.98	274913	29	15	180	5.05	55249	27668	28238	6.1978	1.7038	Yellow
8765	Q01813	K6PP_HUMAN	6 phosphofructokinase type C OS Homo sapiens GN PFKP PE 1 SV 2	Regular	75.0391	20.94	86508.7	11	5	51	5.1	18968	13092	7127	2.9327	0.2537	Red
2820	Q02224	CENPE_HUMAN	Centromere associated protein E OS Homo sapiens GN CENPE PE 1 SV 2	Regular	74.7751	20.9	317784	60	33	342	3.96	283741	118014	74681	26.4358	8.4009	Red	2770
8136	Q04637	IF4G1_HUMAN	Eukaryotic translation initiation factor 4 gamma 1 OS Homo sapiens GN EIF4G1 PE 1 SV 4	Regular	74.5099	21.01	176233	17	10	121	3.88	88996	21736	9502	4.869	0.8581	Yellow
2828	Q96H22	CENPN_HUMAN	Centromere protein N OS Homo sapiens GN CENPN PE 1 SV 2	Regular	74.2944	20.97	39725.7	5	3	27	12.39	6149	6149	1769	1.3774	0.0547	Red
17992	Q9UPV9	TRAK1_HUMAN	Trafficking kinesin binding protein 1 OS Homo sapiens GN TRAK1 PE 1 SV 1	Regular	74.2207	20.93	107009	16	9	89	1.57	132520	280956	32994	62.9356	6.7347	Red
9741	Q8ND23	LR16B_HUMAN	Leucine rich repeat containing protein 16B OS Homo sapiens GN LRRC16B PE 2 SV 2	Regular	73.8699	21.04	151827	22	8	99	4.08	36133	21725	11905	4.8665	0.7389	Red
3771	Q9BV73	CP250_HUMAN	Centrosome associated protein CEP250 OS Homo sapiens GN CEP250 PE 1 SV 2	Regular	73.7177	21.15	282050	53	31	280	3.97	164388	21235	54979	4.7568	1.3416	Red
11558	P29475	NOS1_HUMAN	Nitric oxide synthase brain OS Homo sapiens GN NOS1 PE 1 SV 2	Regular	73.376	21.11	162339	23	12	115	1.88	56933	12178.5	16184	2.728	0.4429	Red	23676 23828 18250 37033 13009 4369 28972 19599 8327 39644 16019 25347 31823 30064
4369	Q7L576	CYFP1_HUMAN	Cytoplasmic FMR1 interacting protein 1 OS Homo sapiens GN CYFIP1 PE 1 SV 1	Regular	73.3607	21.07	146837	31	12	95	4.23	205813	161376	37529	36.1491	5.308	Yellow	19599 23676 23828 18250 37033 13009 28972 11558 8327 39644 16019 25347 31823 30064
10179	P27448	MARK3_HUMAN	MAP microtubule affinity regulating kinase 3 OS Homo sapiens GN MARK3 PE 1 SV 4	Regular	73.1101	21.48	85002	13	8	66	2.12	35420	16995	8632	3.807	0.3236	Red
3240	Q96SN8	CK5P2_HUMAN	CDK5 regulatory subunit associated protein 2 OS Homo sapiens GN CDK5RAP2 PE 1 SV 5	Regular	72.9173	21.59	216578	25	17	174	3.91	98229	23805	24688	5.3324	1.1549	Red
7409	P78347	GTF2I_HUMAN	General transcription factor II I OS Homo sapiens GN GTF2I PE 1 SV 2	Regular	72.732	21.85	112930	15	12	84	4.01	27784	4212	8079	0.9435	0.1066	Red
10963	P13533	MYH6_HUMAN	Myosin 6 OS Homo sapiens GN MYH6 PE 1 SV 5	Regular	72.4567	21.95	224534	39	21	159	3.46	152962	19379.2	33694	4.3411	0.9747	Red	10962 10961 10966 10956 10964 10960 10959 10965
10961	P11055	MYH3_HUMAN	Myosin 3 OS Homo sapiens GN MYH3 PE 1 SV 3	Regular	72.1892	22.2	224989	33	17	158	3.97	121499	6258.13	27681	1.4019	0.3154	Yellow	10962 10966 10956 10963 10964 10960 10959 10965
14249	Q8TDY2	RBCC1_HUMAN	RB1 inducible coiled coil protein 1 OS Homo sapiens GN RB1CC1 PE 1 SV 3	Regular	72.1644	22.16	185201	23	11	149	4.83	77067	34103	20080	7.6393	1.4148	Red
7528	O43593	HAIR_HUMAN	Protein hairless OS Homo sapiens GN HR PE 1 SV 5	Regular	71.9421	22.12	130061	22	11	86	5.38	46193	6191	16801	1.3868	0.1804	Red
14164	P15918	RAG1_HUMAN	V D J recombination activating protein 1 OS Homo sapiens GN RAG1 PE 1 SV 2	Regular	71.2371	22.51	121036	18	10	85	4.6	691922	19752	99798	4.4246	0.5355	Red
13299	Q15149	PLEC_HUMAN	Plectin OS Homo sapiens GN PLEC PE 1 SV 3	Regular	70.8521	22.75	533787	94	49	468	3.16	439605	25402.7	169383	5.6903	3.0374	Red	4662 9769 5497 8993
2509	Q8WWL7	CCNB3_HUMAN	G2 mitotic specific cyclin B3 OS Homo sapiens GN CCNB3 PE 1 SV 2	Regular	70.7364	22.71	159114	29	14	179	4.8	71473	18795	25045	4.2102	0.6699	Red
17816	O95271	TNKS1_HUMAN	Tankyrase 1 OS Homo sapiens GN TNKS PE 1 SV 2	Regular	70.5547	22.95	143808	31	18	100	6.33	87451	32276	22176	7.23	1.0397	Red
18681	Q5W0Q7	USPL1_HUMAN	Ubiquitin specific peptidase like protein 1 OS Homo sapiens GN USPL1 PE 2 SV 1	Regular	70.139	23.33	122208	21	10	71	5.4	56009	33405	23283	7.4829	0.9145	Red
1319	Q96BY7	ATG2B_HUMAN	Autophagy related protein 2 homolog B OS Homo sapiens GN ATG2B PE 1 SV 5	Regular	70.0425	23.29	234645	31	17	148	3.9	64070	29907	20842	6.6993	1.572	Red	1318
6787	Q96CN9	GCC1_HUMAN	GRIP and coiled coil domain containing protein 1 OS Homo sapiens GN GCC1 PE 1 SV 1	Regular	70.0148	23.24	88038.9	18	12	77	2.58	49565	4693.5	13865	1.0514	0.0926	Red
6863	P14136	GFAP_HUMAN	Glial fibrillary acidic protein OS Homo sapiens GN GFAP PE 1 SV 1	Regular	69.9685	23.2	49937.3	6	6	48	6.25	128839	10083	7846	2.2586	0.1128	Red
11411	O14745	NHRF1_HUMAN	Na H exchange regulatory cofactor NHE RF1 OS Homo sapiens GN SLC9A3R1 PE 1 SV 4	Regular	69.4656	23.3	39153.6	9	6	34	7.54	40109	16195	18117	3.6278	0.142	Red
16055	O95347	SMC2_HUMAN	Structural maintenance of chromosomes protein 2 OS Homo sapiens GN SMC2 PE 1 SV 2	Regular	69.4398	23.26	136170	24	16	115	4.93	82429	41104	25075	9.2075	1.2538	Red	2821
18630	Q8NB66	UN13C_HUMAN	Protein unc 13 homolog C OS Homo sapiens GN UNC13C PE 1 SV 3	Regular	68.7754	23.35	252851	42	24	176	1.31	394642	3629.18	83686	0.813	0.2056	Red	18629 18628
4829	P11532	DMD_HUMAN	Dystrophin OS Homo sapiens GN DMD PE 1 SV 3	Regular	68.5128	23.72	428803	50	25	318	3.39	305646	30182	74024	6.7609	2.8991	Red
14505	O14827	RGRF2_HUMAN	Ras specific guanine nucleotide releasing factor 2 OS Homo sapiens GN RASGRF2 PE 1 SV 2	Regular	68.3533	23.81	142247	18	9	81	2.26	82536	37562	19670	8.4141	1.1969	Red
1631	Q96G01	BICD1_HUMAN	Protein bicaudal D homolog 1 OS Homo sapiens GN BICD1 PE 1 SV 3	Regular	68.2319	24.04	111320	17	12	91	4.51	89211	18677	15636	4.1837	0.4657	Red	1632
11560	P29474	NOS3_HUMAN	Nitric oxide synthase endothelial OS Homo sapiens GN NOS3 PE 1 SV 3	Regular	68.1118	23.99	134943	26	13	86	4.24	83180	49532	32733	11.0954	1.4972	Red
16629	P40763	STAT3_HUMAN	Signal transducer and activator of transcription 3 OS Homo sapiens GN STAT3 PE 1 SV 2	Regular	67.6564	24.35	88866.4	12	7	58	2.6	28482	12435	6875	2.7855	0.2475	Red
13857	Q13200	PSMD2_HUMAN	26S proteasome non ATPase regulatory subunit 2 OS Homo sapiens GN PSMD2 PE 1 SV 3	Regular	67.559	24.31	100941	15	7	85	5.4	50438	30635	7682	6.8624	0.6927	Red
5148	Q86Y13	DZIP3_HUMAN	E3 ubiquitin protein ligase DZIP3 OS Homo sapiens GN DZIP3 PE 1 SV 2	Regular	67.4339	24.39	140144	18	10	115	2.65	37619	6478	13290	1.4511	0.2034	Red
1808	Q6UXG8	BTNL9_HUMAN	Butyrophilin like protein 9 OS Homo sapiens GN BTNL9 PE 2 SV 1	Regular	67.2891	24.35	60172.3	6	4	32	11.03	7066	6239	7453	1.3976	0.0841	Red
14426	Q9UBZ9	REV1_HUMAN	DNA repair protein REV1 OS Homo sapiens GN REV1 PE 1 SV 1	Regular	67.1706	24.31	139446	20	7	86	3.2	55360	28538	19373	6.3927	0.8914	Red
10916	Q8N9H8	MUT7_HUMAN	Probable exonuclease mut 7 homolog OS Homo sapiens GN EXD3 PE 1 SV 3	Regular	67.1108	24.4	98138	18	8	66	4.79	56737	15372	11309	3.4434	0.3379	Red
8224	Q8N9C0	IGS22_HUMAN	Immunoglobulin superfamily member 22 OS Homo sapiens GN IGSF22 PE 1 SV 2	Regular	66.9684	24.36	100971	18	10	76	4.43	46757	14020.5	12635	3.1407	0.3171	Red
7913	Q8NDA8	HTR7A_HUMAN	HEAT repeat containing protein 7A OS Homo sapiens GN HEATR7A PE 1 SV 3	Regular	66.8135	24.44	183816	19	9	128	1.89	29978	16640	10531	3.7274	0.6852	Yellow
846	Q8N283	ANR35_HUMAN	Ankyrin repeat domain containing protein 35 OS Homo sapiens GN ANKRD35 PE 2 SV 2	Regular	66.638	24.53	110878	18	11	87	4.9	45867	10318	16208	2.3113	0.2563	Red
5321	Q9Y262	EIF3L_HUMAN	Eukaryotic translation initiation factor 3 subunit L OS Homo sapiens GN EIF3L PE 1 SV 1	Regular	66.5602	24.49	66955.2	6	2	38	5.32	5154	7731	2816	1.7318	0.116	Red
20065	Q3KP31	ZN791_HUMAN	Zinc finger protein 791 OS Homo sapiens GN ZNF791 PE 2 SV 1	Regular	66.1614	24.58	69152.8	9	5	46	7.29	16907	4753	4491	1.0647	0.0736	Red	1828 1830
10504	Q99797	MIPEP_HUMAN	Mitochondrial intermediate peptidase OS Homo sapiens GN MIPEP PE 1 SV 2	Regular	66.1262	24.53	81439.3	11	7	62	3.37	60207	40572	10255	9.0883	0.7401	Red
8749	P04259	K2C6B_HUMAN	Keratin type II cytoskeletal 6B OS Homo sapiens GN KRT6B PE 1 SV 5	Regular	65.9939	24.49	60352.2	19	10	44	3.55	40606	8025	13690	1.7976	0.1085	Red
10943	Q7Z401	MYCPP_HUMAN	C myc promoter binding protein OS Homo sapiens GN DENND4A PE 1 SV 2	Regular	65.5466	24.58	211925	32	13	133	3.17	188961	130300	43666	29.1879	6.1856	Red
16436	P02549	SPTA1_HUMAN	Spectrin alpha chain erythrocytic 1 OS Homo sapiens GN SPTA1 PE 1 SV 5	Regular	64.7823	25.17	281212	37	21	234	2.32	220665	108768	46608	24.3646	6.8516	Red
5121	Q8WXX0	DYH7_HUMAN	Dynein heavy chain 7 axonemal OS Homo sapiens GN DNAH7 PE 1 SV 2	Regular	64.7607	25.12	464696	56	32	327	2.88	152172	31405	51836	7.0349	3.2691	Red	5118 21968 2375
7565	Q9Y450	HBS1L_HUMAN	HBS1 like protein OS Homo sapiens GN HBS1L PE 1 SV 1	Regular	64.7405	25.08	75986.3	14	7	60	1.17	32466	4767	13366	1.0678	0.0811	Red	18095 8780 2770 12812
17949	P12270	TPR_HUMAN	Nucleoprotein TPR OS Homo sapiens GN TPR PE 1 SV 3	Regular	64.5871	25.04	267692	56	27	200	3.39	184578	11513	66598	2.579	0.6904	Red
3377	P30622	CLIP1_HUMAN	CAP Gly domain containing linker protein 1 OS Homo sapiens GN CLIP1 PE 1 SV 2	Regular	64.4796	25.12	162988	29	14	142	4.38	80835	29738	33011	6.6615	1.0857	Red	31214 3378
16446	Q9H254	SPTN4_HUMAN	Spectrin beta chain non erythrocytic 4 OS Homo sapiens GN SPTBN4 PE 1 SV 2	Regular	64.3959	25.21	290183	40	23	245	3.94	322183	16175	36938	3.6233	1.0514	Red	16438 16445 16439
5045	Q9Y4J8	DTNA_HUMAN	Dystrobrevin alpha OS Homo sapiens GN DTNA PE 1 SV 2	Regular	64.1244	25.41	84699.6	12	6	59	4.17	40049	11535	8438	2.5839	0.2189	Red
13009	P98160	PGBM_HUMAN	Basement membrane specific heparan sulfate proteoglycan core protein OS Homo sapiens GN HSPG2 PE 1 S	Regular	63.9288	25.61	479552	51	21	260	2.94	260821	46958	43693	10.5188	5.0443	Red	19599 23676 23828 18250 37033 4369 28972 11558 8327 39644 16019 25347 31823 30064
4516	P43146	DCC_HUMAN	Netrin receptor DCC OS Homo sapiens GN DCC PE 1 SV 2	Regular	63.8567	25.57	159369	20	7	80	6.43	46273	21418	13934	4.7977	0.7646	Yellow
15166	P28702	RXRB_HUMAN	Retinoic acid receptor RXR beta OS Homo sapiens GN RXRB PE 1 SV 2	Regular	63.3505	26.13	57834.4	5	4	49	6.75	16146	10745	6510	2.4069	0.1392	Red
10956	Q9UKX3	MYH13_HUMAN	Myosin 13 OS Homo sapiens GN MYH13 PE 1 SV 2	Regular	63.1827	26.21	224746	32	14	160	4.23	121454	28399	27265	6.3615	1.4297	Red	10962 10961 10966 10963 10964 10960 10959 10965
13283	Q4KWH8	PLCH1_HUMAN	1 phosphatidylinositol 4 5 bisphosphate phosphodiesterase eta 1 OS Homo sapiens GN PLCH1 PE 1 SV 1	Regular	62.5389	26.75	191333	17	10	124	2.72	94884	11959	17349	2.6789	0.5126	Red
16260	Q9H0E3	SP130_HUMAN	Histone deacetylase complex subunit SAP130 OS Homo sapiens GN SAP130 PE 1 SV 1	Regular	62.5036	26.71	110495	6	2	47	2.58	11440	17160	3818	3.8439	0.4247	Red
7109	Q14789	GOGB1_HUMAN	Golgin subfamily B member 1 OS Homo sapiens GN GOLGB1 PE 1 SV 2	Regular	62.1874	26.9	377445	70	36	362	3.04	129228	12917	56636	2.8935	1.0921	Red
13113	Q99755	PI51A_HUMAN	Phosphatidylinositol 4 phosphate 5 kinase type 1 alpha OS Homo sapiens GN PIP5K1A PE 1 SV 1	Regular	62.0456	27.09	63089.7	9	6	47	7.83	44077	16316.1	5961	3.6549	0.2306	Red	13114
7621	Q9ULI3	HEG1_HUMAN	Protein HEG homolog 1 OS Homo sapiens GN HEG1 PE 1 SV 3	Regular	61.5988	27.39	149115	11	6	79	2.82	22324	6993	6987	1.5665	0.2336	Red
5120	Q9C0G6	DYH6_HUMAN	Dynein heavy chain 6 axonemal OS Homo sapiens GN DNAH6 PE 1 SV 3	Regular	61.4857	27.57	479975	61	33	314	3.05	248108	56622	56851	12.6836	6.0878	Red	5125
17047	Q9H2D6	TARA_HUMAN	TRIO and F actin binding protein OS Homo sapiens GN TRIOBP PE 1 SV 3	Regular	61.4317	27.64	264284	25	13	220	2.58	119840	16455	18800	3.686	0.9742	Red	10716
17884	Q9H497	TOR3A_HUMAN	Torsin 3A OS Homo sapiens GN TOR3A PE 1 SV 1	Regular	61.2653	27.71	46769.4	2	2	38	4.53	7369	11053.5	2533	2.476	0.1158	Red
18801	Q76NI1	VKIND_HUMAN	Protein very KIND OS Homo sapiens GN KNDC1 PE 2 SV 2	Regular	61.1027	27.78	193621	23	11	116	4.69	30858	16279	15017	3.6466	0.7061	Red	18260
8644	Q14159	K0146_HUMAN	Uncharacterized protein KIAA0146 OS Homo sapiens GN KIAA0146 PE 2 SV 2	Regular	60.8823	28.07	102198	15	5	71	5.03	20196	13032	8701	2.9192	0.2983	Red
868	Q7Z6G8	ANS1B_HUMAN	Ankyrin repeat and sterile alpha motif domain containing protein 1B OS Homo sapiens GN ANKS1B PE 1 S	Regular	60.8456	28.02	139321	14	8	87	0.8	38732	6588	12770	1.4757	0.2056	Red
1828	A2RUR9	C144A_HUMAN	Coiled coil domain containing protein 144A OS Homo sapiens GN CCDC144A PE 1 SV 1	Regular	60.8237	27.98	166551	22	10	140	2.8	48052	4982.74	11266	1.1162	0.1859	Red	20065 1830
11500	Q05586	NMDZ1_HUMAN	Glutamate NMDA receptor subunit zeta 1 OS Homo sapiens GN GRIN1 PE 1 SV 1	Regular	60.7277	27.94	106057	15	7	80	2.99	300304	5572.5	70040	1.2483	0.1324	Red
19197	Q9ULM3	YETS2_HUMAN	YEATS domain containing protein 2 OS Homo sapiens GN YEATS2 PE 1 SV 2	Regular	60.6386	28.01	151694	20	10	99	2.18	137733	12863	33726	2.8814	0.4371	Red
10716	Q6WCQ1	MPRIP_HUMAN	Myosin phosphatase Rho interacting protein OS Homo sapiens GN MPRIP PE 1 SV 3	Regular	60.384	27.96	117332	15	9	102	4	47586	12483	25708	2.7963	0.3281	Red	17047
2433	Q8NA47	CCD63_HUMAN	Coiled coil domain containing protein 63 OS Homo sapiens GN CCDC63 PE 1 SV 1	Regular	60.3096	27.92	66364.5	10	4	48	3.73	21196	10833	7100	2.4266	0.161	Red
4910	Q9BZ29	DOCK9_HUMAN	Dedicator of cytokinesis protein 9 OS Homo sapiens GN DOCK9 PE 1 SV 2	Regular	60.2729	27.88	238670	28	19	167	4.01	87404	28155	25527	6.3069	1.5053	Red
10449	O43451	MGA_HUMAN	Maltase glucoamylase intestinal OS Homo sapiens GN MGAM PE 1 SV 5	Regular	60.1937	27.84	211164	8	6	108	4.47	20151	9983	7409	2.2362	0.4722	Red
3122	Q9P1Z9	CI174_HUMAN	Uncharacterized protein C9orf174 OS Homo sapiens GN C9orf174 PE 1 SV 2	Regular	60.1746	27.79	192526	31	11	155	3.58	37038	11175	23460	2.5033	0.4819	Red
18616	Q8TAS1	UHMK1_HUMAN	Serine threonine protein kinase Kist OS Homo sapiens GN UHMK1 PE 1 SV 2	Regular	59.7932	27.97	47173.6	5	3	33	4.77	8059	3882	8491	0.8696	0.041	Red
2599	Q5ZPR3	CD276_HUMAN	CD276 antigen OS Homo sapiens GN CD276 PE 1 SV 1	Regular	59.4026	28.14	57976.9	2	1	28	4.87	5248	10779	3974	2.4146	0.14	Red
13182	Q8TC59	PIWL2_HUMAN	Piwi like protein 2 OS Homo sapiens GN PIWIL2 PE 1 SV 1	Regular	59.3198	28.1	111161	16	10	93	3.7	35401	17282	12218	3.8713	0.4303	Red
17475	Q9UNS1	TIM_HUMAN	Protein timeless homolog OS Homo sapiens GN TIMELESS PE 1 SV 2	Regular	59.0837	28.38	139685	15	7	100	4.72	26807	13757	6188	3.0816	0.4305	Red
18980	Q8TBY9	WDR66_HUMAN	WD repeat containing protein 66 OS Homo sapiens GN WDR66 PE 1 SV 2	Regular	59.04	28.34	131207	12	9	108	2.96	32312	13681.5	8914	3.0647	0.4021	Red
15624	Q7Z5N4	SDK1_HUMAN	Protein sidekick 1 OS Homo sapiens GN SDK1 PE 1 SV 3	Regular	59.0236	28.3	243139	27	15	129	3.03	92674	28565	24025	6.3987	1.5558	Red
8256	Q14005	IL16_HUMAN	Pro interleukin 16 OS Homo sapiens GN IL16 PE 1 SV 4	Regular	58.9	28.25	143064	14	9	110	5.86	86638	26480	10225	5.9317	0.8486	Red
12402	Q9BXW6	OSBL1_HUMAN	Oxysterol binding protein related protein 1 OS Homo sapiens GN OSBPL1A PE 1 SV 2	Regular	58.86	28.32	109839	11	7	79	4.95	39298	13116	15823	2.9381	0.3227	Red
17114	Q86TI0	TBCD1_HUMAN	TBC1 domain family member 1 OS Homo sapiens GN TBC1D1 PE 1 SV 2	Regular	58.8328	28.28	134396	27	11	98	5.05	54767	10004	29220	2.2409	0.3012	Red
14498	A6NKT7	RGPD3_HUMAN	RanBP2 like and GRIP domain containing protein 3 OS Homo sapiens GN RGPD3 PE 2 SV 2	Regular	58.7311	28.24	198856	25	14	139	3.92	185471	6889.73	55284	1.5433	0.3069	Green	14304 14501
19128	Q9H0D6	XRN2_HUMAN	5 3 exoribonuclease 2 OS Homo sapiens GN XRN2 PE 1 SV 1	Regular	58.7178	28.19	109495	23	9	83	1.68	65077	8674.5	11273	1.9431	0.2128	Red
2416	Q9UFE4	CCD39_HUMAN	Coiled coil domain containing protein 39 OS Homo sapiens GN CCDC39 PE 2 SV 3	Regular	58.5364	28.15	110414	15	10	103	3.51	57986	38389	13222	8.5993	0.9495	Red
14013	P11498	PYC_HUMAN	Pyruvate carboxylase mitochondrial OS Homo sapiens GN PC PE 1 SV 2	Regular	58.3228	28.11	130375	21	9	89	3.31	68727	17223	15032	3.858	0.503	Red
3370	P53675	CLH2_HUMAN	Clathrin heavy chain 2 OS Homo sapiens GN CLTCL1 PE 1 SV 2	Regular	58.1909	28.28	189140	19	11	133	3.84	44625	14813.8	18290	3.3184	0.6276	Yellow	3369
11025	O14974	MYPT1_HUMAN	Protein phosphatase 1 regulatory subunit 12A OS Homo sapiens GN PPP1R12A PE 1 SV 1	Regular	58.1801	28.24	115680	17	11	110	5.15	51760	7194	12463	1.6115	0.1864	Red
5388	A4GXA9	EME2_HUMAN	Probable crossover junction endonuclease EME2 OS Homo sapiens GN EME2 PE 1 SV 2	Regular	58.0771	28.2	41777.3	10	5	28	3.96	122917	4233	23428	0.9482	0.0396	Red
11533	Q9BZE4	NOG1_HUMAN	Nucleolar GTP binding protein 1 OS Homo sapiens GN GTPBP4 PE 1 SV 3	Regular	58.0434	28.16	74363.9	10	3	57	3	64028	15856.5	10097	3.5519	0.2641	Red
17517	Q9NR96	TLR9_HUMAN	Toll like receptor 9 OS Homo sapiens GN TLR9 PE 1 SV 2	Regular	57.9709	28.22	117514	15	10	68	3.2	63783	14179	33222	3.1762	0.3732	Red
9613	Q13136	LIPA1_HUMAN	Liprin alpha 1 OS Homo sapiens GN PPFIA1 PE 1 SV 1	Regular	57.6166	28.39	136349	25	15	118	3.74	98213	25543	28117	5.7218	0.7802	Red
16577	O60284	ST18_HUMAN	Suppression of tumorigenicity 18 protein OS Homo sapiens GN ST18 PE 1 SV 1	Regular	57.3955	28.55	116923	21	15	95	3.44	123412	38290	36831	8.5772	1.0029	Red
15466	Q6SZW1	SARM1_HUMAN	Sterile alpha and TIR motif containing protein 1 OS Homo sapiens GN SARM1 PE 1 SV 1	Regular	57.328	28.51	80414.8	17	11	67	5.94	31304	4546	16900	1.0183	0.0819	Red
15441	Q8IVG5	SAM9L_HUMAN	Sterile alpha motif domain containing protein 9 like OS Homo sapiens GN SAMD9L PE 1 SV 2	Regular	57.1155	28.57	186244	17	10	146	2.65	30556	11171.9	19991	2.5026	0.4661	Red	15448
2682	Q14004	CDK13_HUMAN	Cyclin dependent kinase 13 OS Homo sapiens GN CDK13 PE 1 SV 2	Regular	56.9206	28.53	165665	14	8	125	2.18	18172	7914	12380	1.7728	0.2937	Red
5125	Q8NCM8	DYHC2_HUMAN	Cytoplasmic dynein 2 heavy chain 1 OS Homo sapiens GN DYNC2H1 PE 1 SV 4	Regular	56.7435	28.59	496101	37	23	346	2.46	181793	19579	63433	4.3858	2.1758	Yellow	5120
4178	O60716	CTND1_HUMAN	Catenin delta 1 OS Homo sapiens GN CTNND1 PE 1 SV 1	Regular	56.4302	28.55	108740	8	5	83	2.89	33528	12547.5	7599	2.8107	0.3056	Red
13637	Q96QH2	PRAM_HUMAN	PML RARA regulated adapter molecule 1 OS Homo sapiens GN PRAM1 PE 1 SV 2	Regular	56.3518	28.51	79359	11	6	85	2.79	26718	15991.5	7415	3.5822	0.2843	Red
11674	Q86VF7	NRAP_HUMAN	Nebulin related anchoring protein OS Homo sapiens GN NRAP PE 2 SV 2	Regular	56.3223	28.47	198044	34	20	168	1.85	170823	12794	35521	2.8659	0.5676	Red
11052	Q14CX7	NAA25_HUMAN	N alpha acetyltransferase 25 NatB auxiliary subunit OS Homo sapiens GN NAA25 PE 1 SV 1	Regular	56.2096	28.53	113205	13	8	80	3.19	53856	19676	6143	4.4075	0.499	Red
16444	Q13813	SPTN1_HUMAN	Spectrin alpha chain non erythrocytic 1 OS Homo sapiens GN SPTAN1 PE 1 SV 3	Regular	56.0966	28.59	285338	46	24	272	3.56	128341	33020	39097	7.3967	2.1105	Red
2375	Q6TFL3	CC171_HUMAN	Coiled coil domain containing protein 171 OS Homo sapiens GN CCDC171 PE 2 SV 1	Regular	56.066	28.55	154179	29	19	148	4.9	111376	26251	27625	5.8804	0.9066	Red	5118 21968 5121
618	Q99996	AKAP9_HUMAN	A kinase anchor protein 9 OS Homo sapiens GN AKAP9 PE 1 SV 3	Regular	55.8923	28.71	456006	53	41	411	2.94	163603	15181	47413	3.4006	1.5507	Red	5117
18405	O75643	U520_HUMAN	U5 small nuclear ribonucleoprotein 200 kDa helicase OS Homo sapiens GN SNRNP200 PE 1 SV 2	Regular	55.8708	28.67	246162	28	16	177	2.81	79391	20406	43721	4.5711	1.1252	Red
16812	Q15046	SYK_HUMAN	Lysine tRNA ligase OS Homo sapiens GN KARS PE 1 SV 3	Regular	55.7646	29.03	68504.4	6	4	45	3.18	12685	9159	3877	2.0517	0.1405	Red
16438	P11277	SPTB1_HUMAN	Spectrin beta chain erythrocytic OS Homo sapiens GN SPTB PE 1 SV 5	Regular	55.6915	28.99	247324	31	20	217	2.62	64139	16912	28203	3.7884	0.937	Red	16445 16439 16446
7106	Q13439	GOGA4_HUMAN	Golgin subfamily A member 4 OS Homo sapiens GN GOLGA4 PE 1 SV 1	Regular	55.6567	29.05	262053	46	29	278	3.81	128500	31056	34770	6.9567	1.823	Red	29277 18549
4731	Q7Z478	DHX29_HUMAN	ATP dependent RNA helicase DHX29 OS Homo sapiens GN DHX29 PE 1 SV 2	Regular	55.5923	29.2	156319	17	10	112	3.65	69036	15258	15280	3.4179	0.5343	Red	21477 6299
14021	P27708	PYR1_HUMAN	CAD protein OS Homo sapiens GN CAD PE 1 SV 3	Regular	55.4675	29.26	245322	36	18	141	3.28	91259	8811	27907	1.9737	0.4842	Red	13020 18692 18114
18790	P18206	VINC_HUMAN	Vinculin OS Homo sapiens GN VCL PE 1 SV 4	Regular	55.4325	29.22	124370	15	14	107	5.73	50737	16980	11478	3.8036	0.4731	Red	19647 10644 1590 14135 24992
13226	Q9ULM0	PKHH1_HUMAN	Pleckstrin homology domain containing family H member 1 OS Homo sapiens GN PLEKHH1 PE 2 SV 2	Regular	55.0092	29.18	152829	16	10	104	1.61	52922	24104	9203	5.3994	0.8252	Red
12666	Q8TEW0	PARD3_HUMAN	Partitioning defective 3 homolog OS Homo sapiens GN PARD3 PE 1 SV 2	Regular	54.8601	29.43	151937	23	12	118	4.57	45818	10224	15275	2.2902	0.348	Red
11703	P58400	NRX1B_HUMAN	Neurexin 1 beta OS Homo sapiens GN NRXN1 PE 1 SV 2	Regular	54.6677	29.39	47088.7	5	3	29	3.39	6504	0	2676			Red	11702
1084	Q9Y4B4	ARIP4_HUMAN	Helicase ARIP4 OS Homo sapiens GN RAD54L2 PE 1 SV 4	Regular	54.6567	29.35	164138	20	9	104	3.14	57875	27106	14058	6.0719	0.9966	Red
2092	Q5T5Y3	CAMP1_HUMAN	Calmodulin regulated spectrin associated protein 1 OS Homo sapiens GN CAMSAP1 PE 1 SV 2	Regular	54.5827	29.31	179341	19	12	154	5.49	74503	24011	15925	5.3786	0.9646	Red
1674	P13497	BMP1_HUMAN	Bone morphogenetic protein 1 OS Homo sapiens GN BMP1 PE 1 SV 2	Regular	54.5784	29.36	113587	11	5	77	2.94	14615	4233	6293	0.9482	0.1077	Red
6853	P57678	GEMI4_HUMAN	Gem associated protein 4 OS Homo sapiens GN GEMIN4 PE 1 SV 2	Regular	54.4386	29.32	121805	14	6	77	2.93	22010	20197.5	7365	4.5243	0.5511	Red
8658	A3KMH1	K0564_HUMAN	Uncharacterized protein KIAA0564 OS Homo sapiens GN KIAA0564 PE 1 SV 2	Regular	54.366	29.28	215851	28	14	176	1.73	169934	43029	27181	9.6387	2.0805	Red
2346	Q96JN2	CC136_HUMAN	Coiled coil domain containing protein 136 OS Homo sapiens GN CCDC136 PE 2 SV 3	Regular	54.3259	29.25	135699	22	12	118	1.04	48405	3045	16639	0.6821	0.0926	Red	20467 10955 26604
10776	P52701	MSH6_HUMAN	DNA mismatch repair protein Msh6 OS Homo sapiens GN MSH6 PE 1 SV 2	Regular	54.1433	29.3	154611	11	5	98	1.1	10135	6786	3977	1.5201	0.235	Red
7345	Q7LDG7	GRP2_HUMAN	RAS guanyl releasing protein 2 OS Homo sapiens GN RASGRP2 PE 1 SV 1	Regular	54.1213	29.26	70104	8	3	49	6.24	47685	57585	6829	12.8994	0.9043	Red
1535	Q9NRL2	BAZ1A_HUMAN	Bromodomain adjacent to zinc finger domain protein 1A OS Homo sapiens GN BAZ1A PE 1 SV 2	Regular	54.1201	29.22	180356	24	14	124	4.76	50480	26534	17027	5.9438	1.072	Red
3536	Q9NXG0	CNTLN_HUMAN	Centlein OS Homo sapiens GN CNTLN PE 2 SV 5	Regular	53.899	29.18	162231	21	11	163	3.2	52728	21811	25201	4.8858	0.7926	Red
9850	Q9Y608	LRRF2_HUMAN	Leucine rich repeat flightless interacting protein 2 OS Homo sapiens GN LRRFIP2 PE 1 SV 1	Regular	53.8414	29.24	82399.7	10	7	70	1.53	44458	3546	7797	0.7943	0.0655	Red
14016	P11216	PYGB_HUMAN	Glycogen phosphorylase brain form OS Homo sapiens GN PYGB PE 1 SV 5	Regular	53.6926	29.39	97380.5	22	8	79	3.08	47351	9160	12898	2.0519	0.1998	Red
18355	Q8N427	TXND3_HUMAN	Thioredoxin domain containing protein 3 OS Homo sapiens GN NME8 PE 1 SV 2	Regular	53.6212	29.35	67726.3	11	6	54	9.69	64719	38421	20372	8.6065	0.5829	Red
17209	O14776	TCRG1_HUMAN	Transcription elongation regulator 1 OS Homo sapiens GN TCERG1 PE 1 SV 2	Regular	53.5337	29.31	124129	18	8	107	3.1	58657	48985	11774	10.9729	1.3621	Red
7075	Q6P2S7	GNN_HUMAN	Tetratricopeptide repeat protein GNN OS Homo sapiens GN GNN PE 2 SV 3	Regular	53.2946	29.37	153338	14	7	97	3.26	27250	9245	9231	2.0709	0.3176	Red
8660	Q9Y4D8	K0614_HUMAN	Probable E3 ubiquitin protein ligase C12orf51 OS Homo sapiens GN C12orf51 PE 1 SV 5	Regular	53.1509	29.51	444990	37	18	277	1.58	68641	14908	26957	3.3395	1.486	Yellow	17291
4923	Q9Y3R5	DOP2_HUMAN	Protein dopey 2 OS Homo sapiens GN DOPEY2 PE 1 SV 5	Regular	52.812	30.03	260512	27	16	173	3.52	81766	29353	25398	6.5752	1.7129	Red
7159	Q8NFN8	GP156_HUMAN	Probable G protein coupled receptor 156 OS Homo sapiens GN GPR156 PE 2 SV 2	Regular	52.7102	30.17	90465.9	13	6	57	1.84	72033	15384	7266	3.4461	0.3118	Red	5111
690	Q8TCU4	ALMS1_HUMAN	Alstrom syndrome protein 1 OS Homo sapiens GN ALMS1 PE 1 SV 3	Regular	52.5883	30.13	463360	48	28	329	4.3	202057	34784	41432	7.7918	3.6104	Red
5024	Q8TD84	DSCL1_HUMAN	Down syndrome cell adhesion molecule like protein 1 OS Homo sapiens GN DSCAML1 PE 1 SV 2	Regular	52.4849	30.27	226288	19	11	149	1.32	47950	8302	15282	1.8597	0.4208	Red
7312	P48058	GRIA4_HUMAN	Glutamate receptor 4 OS Homo sapiens GN GRIA4 PE 2 SV 2	Regular	52.449	30.23	101613	9	5	62	2	20047	21486	3212	4.813	0.4891	Red
1296	Q6PL18	ATAD2_HUMAN	ATPase family AAA domain containing protein 2 OS Homo sapiens GN ATAD2 PE 1 SV 1	Regular	52.1277	30.46	159923	18	11	116	3.53	109905	7035	16086	1.5759	0.252	Red
14418	P10745	RET3_HUMAN	Retinol binding protein 3 OS Homo sapiens GN RBP3 PE 1 SV 2	Regular	51.8226	30.6	135819	9	6	68	2.73	36012	18606	16004	4.1678	0.5661	Red
15585	P51170	SCNNG_HUMAN	Amiloride sensitive sodium channel subunit gamma OS Homo sapiens GN SCNN1G PE 1 SV 4	Regular	51.4023	30.83	75525	6	3	41	4.78	50316	68581.5	5346	15.3626	1.1603	Red
6939	Q8ND71	GIMA8_HUMAN	GTPase IMAP family member 8 OS Homo sapiens GN GIMAP8 PE 1 SV 2	Regular	51.355	30.79	75745.7	14	7	66	5.41	35241	27511	10029	6.1626	0.4668	Red
17684	O94876	TMCC1_HUMAN	Transmembrane and coiled coil domains protein 1 OS Homo sapiens GN TMCC1 PE 1 SV 3	Regular	51.2618	30.84	72482.3	8	7	58	5.05	25064	8584	4811	1.9229	0.1394	Red
17264	P24821	TENA_HUMAN	Tenascin OS Homo sapiens GN TNC PE 1 SV 3	Regular	51.2412	30.8	246499	27	13	153	4.68	124448	35325	22311	7.913	1.9505	Red
2921	Q9HAC7	CG010_HUMAN	CaiB baiF CoA transferase family protein C7orf10 OS Homo sapiens GN C7orf10 PE 1 SV 2	Regular	51.1111	31.02	48804.1	6	4	26	1.35	12305	17067	4501	3.8231	0.1866	Red
3573	P02452	CO1A1_HUMAN	Collagen alpha 1 I chain OS Homo sapiens GN COL1A1 PE 1 SV 5	Regular	51.0338	30.98	139968	29	16	93	4.58	116862	33472	32689	7.4979	1.0495	Red	3577
13944	P23467	PTPRB_HUMAN	Receptor type tyrosine protein phosphatase beta OS Homo sapiens GN PTPRB PE 1 SV 3	Regular	50.8946	30.94	225727	24	14	156	2.65	46869	13108	14233	2.9363	0.6628	Red	2821
8780	O60229	KALRN_HUMAN	Kalirin OS Homo sapiens GN KALRN PE 1 SV 2	Regular	50.7973	30.99	343311	46	24	246	2.31	95914	40860	41551	9.1529	3.1423	Yellow	7565 18095 2770 12812
17873	Q02880	TOP2B_HUMAN	DNA topoisomerase 2 beta OS Homo sapiens GN TOP2B PE 1 SV 3	Regular	50.7165	30.95	184237	31	14	139	3.69	61627	27286	17014	6.1122	1.1261	Red
16797	Q6PI48	SYDM_HUMAN	Aspartate tRNA ligase mitochondrial OS Homo sapiens GN DARS2 PE 1 SV 1	Regular	50.67	30.91	74133.1	24	11	61	6.36	66703	10815	21243	2.4226	0.1796	Red
11206	O75376	NCOR1_HUMAN	Nuclear receptor corepressor 1 OS Homo sapiens GN NCOR1 PE 1 SV 2	Regular	50.5592	30.96	271123	24	13	206	1.31	132773	63871	24079	14.3074	3.8791	Red
1248	O60312	AT10A_HUMAN	Probable phospholipid transporting ATPase VA OS Homo sapiens GN ATP10A PE 2 SV 2	Regular	50.4364	31.09	169913	18	10	84	4.4	141683	8157	28228	1.8272	0.3105	Red
6476	A0AVI2	FR1L5_HUMAN	Fer 1 like protein 5 OS Homo sapiens GN FER1L5 PE 2 SV 2	Regular	50.4173	31.06	244130	25	14	175	2.58	174459	126403	31188	28.3149	6.9125	Red
15448	Q5K651	SAMD9_HUMAN	Sterile alpha motif domain containing protein 9 OS Homo sapiens GN SAMD9 PE 1 SV 1	Regular	50.4074	31.02	185821	21	14	135	2.14	59777	5095.13	18724	1.1413	0.2121	Red	15441
8753	Q86Y46	K2C73_HUMAN	Keratin type II cytoskeletal 73 OS Homo sapiens GN KRT73 PE 1 SV 1	Regular	50.2557	31.15	59493.7	7	7	45	5.74	23546	10817.5	4861	2.4232	0.1442	Red	8751 8754
3383	P49761	CLK3_HUMAN	Dual specificity protein kinase CLK3 OS Homo sapiens GN CLK3 PE 1 SV 3	Regular	50.2051	31.11	74313.5	4	4	54	5.17	26145	23067	7803	5.1671	0.384	Red
397	O43707	ACTN4_HUMAN	Alpha actinin 4 OS Homo sapiens GN ACTN4 PE 1 SV 2	Regular	50.0366	31.24	105310	10	7	86	2.31	63379	44596.8	7988	9.9899	1.052	Red	394
12061	Q01968	OCRL_HUMAN	Inositol polyphosphate 5 phosphatase OCRL 1 OS Homo sapiens GN OCRL PE 1 SV 3	Regular	49.905	31.37	105459	4	7	74	5.33	25075	8401	10237	1.8819	0.1985	Red
3168	Q711Q0	CJ071_HUMAN	Uncharacterized protein C10orf71 OS Homo sapiens GN C10orf71 PE 2 SV 2	Regular	49.8373	31.33	157845	23	12	119	1.32	46200	5857.5	16438	1.3121	0.2071	Red
11020	Q14324	MYPC2_HUMAN	Myosin binding protein C fast type OS Homo sapiens GN MYBPC2 PE 1 SV 2	Regular	49.344	31.71	128927	14	8	99	3.33	24119	13500	6939	3.0241	0.3899	Red
12954	O60437	PEPL_HUMAN	Periplakin OS Homo sapiens GN PPL PE 1 SV 4	Regular	49.2793	31.76	205317	40	21	197	1.31	140089	14517	42934	3.2519	0.6677	Red
5655	Q01780	EXOSX_HUMAN	Exosome component 10 OS Homo sapiens GN EXOSC10 PE 1 SV 2	Regular	49.1337	31.8	101630	12	5	83	2.6	61640	50250	9588	11.2563	1.144	Red
13282	P16885	PLCG2_HUMAN	1 phosphatidylinositol 4 5 bisphosphate phosphodiesterase gamma 2 OS Homo sapiens GN PLCG2 PE 1 SV 4	Regular	48.6941	32.09	149068	11	7	107	2.53	32780	7152	11080	1.6021	0.2388	Red
18357	Q86XW9	TXND6_HUMAN	Thioredoxin domain containing protein 6 OS Homo sapiens GN NME9 PE 1 SV 1	Regular	48.6673	32.13	37255	6	2	33	2.42	26106	69897	18543	15.6573	0.5833	Red
16447	Q9NRC6	SPTN5_HUMAN	Spectrin beta chain non erythrocytic 5 OS Homo sapiens GN SPTBN5 PE 1 SV 1	Regular	48.5839	32.18	419516	50	29	327	3.38	139889	35947	36566	8.0523	3.3781	Red
14557	A1A4S6	RHG10_HUMAN	Rho GTPase activating protein 10 OS Homo sapiens GN ARHGAP10 PE 1 SV 1	Regular	48.4641	32.62	90002.1	8	6	77	2.93	23291	9207	4443	2.0624	0.1856	Red
11140	Q8NFP9	NBEA_HUMAN	Neurobeachin OS Homo sapiens GN NBEA PE 1 SV 3	Regular	48.3703	32.82	330274	26	15	222	2.72	72734	23510	30590	5.2664	1.7393	Red	9749
14470	Q8HWS3	RFX6_HUMAN	DNA binding protein RFX6 OS Homo sapiens GN RFX6 PE 1 SV 2	Regular	48.3588	32.78	103544	9	4	48	3.56	12850	15331.5	4544	3.4343	0.3556	Red
6170	Q8N4B4	FBX39_HUMAN	F box only protein 39 OS Homo sapiens GN FBXO39 PE 2 SV 1	Regular	48.3483	32.74	53444.5	6	3	32	2.94	7687	9409.5	2635	2.1078	0.1126	Red
16058	Q8IY18	SMC5_HUMAN	Structural maintenance of chromosomes protein 5 OS Homo sapiens GN SMC5 PE 1 SV 2	Regular	48.3223	32.71	130061	14	13	97	4.45	61667	27469	16806	6.1532	0.8003	Red
16218	Q9Y4B5	SOGA2_HUMAN	Protein SOGA2 OS Homo sapiens GN SOGA2 PE 1 SV 5	Regular	48.1774	32.83	210781	18	11	170	4.25	56674	11061	17101	2.4777	0.5223	Red
727	Q07075	AMPE_HUMAN	Glutamyl aminopeptidase OS Homo sapiens GN ENPEP PE 1 SV 3	Regular	47.9841	32.94	109758	14	8	74	8.25	35651	20221	9045	4.5296	0.4972	Red
10997	Q9ULV0	MYO5B_HUMAN	Unconventional myosin Vb OS Homo sapiens GN MYO5B PE 1 SV 3	Regular	47.9616	32.91	215270	17	15	169	3.63	88572	13667	21390	3.0615	0.659	Red
3590	P01031	CO5_HUMAN	Complement C5 OS Homo sapiens GN C5 PE 1 SV 4	Regular	47.8633	33.02	190016	24	15	135	4.59	64977	15288	34136	3.4246	0.6507	Red
20148	Q15937	ZNF79_HUMAN	Zinc finger protein 79 OS Homo sapiens GN ZNF79 PE 1 SV 2	Regular	47.845	33.06	57003.8	9	4	38	5.82	42278	11061	3875	2.4777	0.1412	Red
16232	Q07890	SOS2_HUMAN	Son of sevenless homolog 2 OS Homo sapiens GN SOS2 PE 1 SV 2	Regular	47.8339	33.02	154348	20	13	114	2.03	115045	30905	18826	6.9229	1.0685	Red
10601	Q13201	MMRN1_HUMAN	Multimerin 1 OS Homo sapiens GN MMRN1 PE 1 SV 3	Regular	47.8136	32.99	139308	21	10	102	2.93	58839	24184	14764	5.4173	0.7547	Red
19321	Q6ZTK2	YP015_HUMAN	Putative uncharacterized protein LOC400499 OS Homo sapiens PE 2 SV 1	Regular	47.7633	32.95	62389.8	4	4	36	5.45	18551	11080.5	4920	2.4821	0.1549	Red
7321	Q7Z2K8	GRIN1_HUMAN	G protein regulated inducer of neurite outgrowth 1 OS Homo sapiens GN GPRIN1 PE 1 SV 2	Regular	47.7431	32.91	103198	18	12	113	3.87	40178	13624.5	13936	3.052	0.315	Red
2920	P13569	CFTR_HUMAN	Cystic fibrosis transmembrane conductance regulator OS Homo sapiens GN CFTR PE 1 SV 3	Regular	47.682	32.87	169168	14	7	106	2.84	36240	7384	8062	1.6541	0.2798	Red
4641	Q5VZ89	DEN4C_HUMAN	DENN domain containing protein 4C OS Homo sapiens GN DENND4C PE 1 SV 2	Regular	47.6138	32.91	188682	22	13	126	2.33	53152	15909	16608	3.5637	0.6724	Red
6496	Q9P2Q2	FRM4A_HUMAN	FERM domain containing protein 4A OS Homo sapiens GN FRMD4A PE 1 SV 3	Regular	47.5728	33.03	116029	14	7	87	2.21	71494	58539	16564	13.1131	1.5215	Red
13073	Q8WWQ0	PHIP_HUMAN	PH interacting protein OS Homo sapiens GN PHIP PE 1 SV 2	Regular	47.5344	32.99	208457	22	13	136	3.68	128808	30279.5	11617	6.7828	1.4139	Red	1762
12541	Q9H3D4	P63_HUMAN	Tumor protein 63 OS Homo sapiens GN TP63 PE 1 SV 1	Regular	47.5266	32.95	77698.1	3	3	47	5.15	9448	9448	3281	2.1164	0.1644	Red
15298	Q9Y2P4	S27A6_HUMAN	Long chain fatty acid transport protein 6 OS Homo sapiens GN SLC27A6 PE 1 SV 1	Regular	47.4738	32.91	70910.1	14	11	52	7.59	58264	16661	14344	3.7322	0.2646	Red
14217	Q86YV0	RASL3_HUMAN	RAS protein activator like 3 OS Homo sapiens GN RASAL3 PE 1 SV 2	Regular	47.1716	33.11	112811	11	8	87	2.57	20368	6928.5	5221	1.552	0.1751	Red
10061	O60336	MABP1_HUMAN	Mitogen activated protein kinase binding protein 1 OS Homo sapiens GN MAPKBP1 PE 2 SV 4	Regular	47.129	33.07	165643	19	7	92	2.84	146024	8976	20921	2.0107	0.3331	Red
7116	Q3T8J9	GON4L_HUMAN	GON 4 like protein OS Homo sapiens GN GON4L PE 1 SV 1	Regular	47.0998	33.03	250617	16	10	169	1.34	34790	18808.5	16188	4.2132	1.0559	Red	19404
1249	O94823	AT10B_HUMAN	Probable phospholipid transporting ATPase VB OS Homo sapiens GN ATP10B PE 2 SV 2	Regular	46.9962	32.99	167786	13	6	94	1.85	39768	36439.5	13254	8.1626	1.3696	Red
9322	Q86UP2	KTN1_HUMAN	Kinectin OS Homo sapiens GN KTN1 PE 1 SV 1	Regular	46.6479	33.48	156561	9	11	166	3.32	69975	21756	8807	4.8735	0.763	Red
904	P63010	AP2B1_HUMAN	AP 2 complex subunit beta OS Homo sapiens GN AP2B1 PE 1 SV 1	Regular	46.5746	33.52	105465	10	6	71	2.56	70001	65116.5	21142	14.5864	1.5384	Red
9466	Q86VQ0	LCA5_HUMAN	Lebercilin OS Homo sapiens GN LCA5 PE 1 SV 2	Regular	46.569	33.48	80725.4	8	6	63	2.15	57809	71535	8857	16.0242	1.2936	Red
1590	A6H8Y1	BDP1_HUMAN	Transcription factor TFIIIB component B homolog OS Homo sapiens GN BDP1 PE 1 SV 3	Regular	46.4841	33.45	295539	23	17	255	2.78	62355	13662	18852	3.0604	0.9045	Red	19647 10644 14135 24992 18790
2330	Q96M63	CC114_HUMAN	Coiled coil domain containing protein 114 OS Homo sapiens GN CCDC114 PE 2 SV 3	Regular	46.3488	33.63	75217.4	9	4	53	1.64	38243	8490	5356	1.9018	0.143	Red
10498	Q8N4C8	MINK1_HUMAN	Misshapen like kinase 1 OS Homo sapiens GN MINK1 PE 1 SV 2	Regular	46.3336	33.67	150506	12	10	97	3.15	55958	3686.7	9165	0.8258	0.1243	Red	17811 8584
9381	P32004	L1CAM_HUMAN	Neural cell adhesion molecule L1 OS Homo sapiens GN L1CAM PE 1 SV 2	Regular	46.3115	33.63	140972	24	12	93	4.14	70651	15882	25323	3.5577	0.5015	Red
17316	Q12789	TF3C1_HUMAN	General transcription factor 3C polypeptide 1 OS Homo sapiens GN GTF3C1 PE 1 SV 4	Regular	46.2909	33.59	241213	20	10	171	1.75	48020	15805	10357	3.5404	0.854	Red
11816	Q9UHK0	NUFP1_HUMAN	Nuclear fragile X mental retardation interacting protein 1 OS Homo sapiens GN NUFIP1 PE 1 SV 2	Regular	46.2455	33.55	56698.9	8	3	31	2.42	13647	11133	4281	2.4939	0.1414	Red
10646	Q14149	MORC3_HUMAN	MORC family CW type zinc finger protein 3 OS Homo sapiens GN MORC3 PE 1 SV 3	Regular	46.1655	33.52	108311	16	7	69	2.13	32199	51768	9158	11.5963	1.256	Red
7672	A2PYH4	HFM1_HUMAN	Probable ATP dependent DNA helicase HFM1 OS Homo sapiens GN HFM1 PE 1 SV 2	Regular	45.9594	33.7	163808	11	7	129	0.91	36938	22230	7654	4.9796	0.8157	Red
4738	Q8IY37	DHX37_HUMAN	Probable ATP dependent RNA helicase DHX37 OS Homo sapiens GN DHX37 PE 1 SV 1	Regular	45.9452	33.66	130629	8	9	81	2.85	26988	4887	7543	1.0947	0.143	Red
5526	Q03468	ERCC6_HUMAN	DNA excision repair protein ERCC 6 OS Homo sapiens GN ERCC6 PE 1 SV 1	Regular	45.8772	33.7	169557	21	11	107	2.34	41603	4718	17858	1.0569	0.1792	Yellow
10964	A7E2Y1	MYH7B_HUMAN	Myosin 7B OS Homo sapiens GN MYH7B PE 2 SV 3	Regular	45.715	33.81	222529	39	19	162	1.13	103644	1853.03	36552	0.4151	0.0924	Red	10962 10961 10966 10956 10963 10960 10959 10965
17894	Q12888	TP53B_HUMAN	Tumor suppressor p53 binding protein 1 OS Homo sapiens GN TP53BP1 PE 1 SV 2	Regular	45.5638	33.99	215628	17	11	146	4.36	39964	12873	13531	2.8836	0.6218	Red
14300	Q9H1K0	RBNS5_HUMAN	Rabenosyn 5 OS Homo sapiens GN ZFYVE20 PE 1 SV 2	Regular	45.562	33.95	89668.2	15	8	78	1.4	142605	18616.5	7595	4.1702	0.3739	Red
18354	Q86VQ3	TXND2_HUMAN	Thioredoxin domain containing protein 2 OS Homo sapiens GN TXNDC2 PE 1 SV 4	Regular	45.5487	33.91	60746.3	11	6	61	3.25	52148	16503	8752	3.6968	0.2246	Red
7295	Q9C091	GRB1L_HUMAN	GREB1 like protein OS Homo sapiens GN GREB1L PE 2 SV 2	Regular	45.3132	34.09	216636	22	11	126	4.06	39725	14701	11329	3.2931	0.7134	Red
6595	Q9Y2I7	FYV1_HUMAN	1 phosphatidylinositol 3 phosphate 5 kinase OS Homo sapiens GN PIKFYVE PE 1 SV 3	Regular	45.258	34.13	239760	28	16	176	1.62	86208	10870	32277	2.4349	0.5838	Red
18622	Q13564	ULA1_HUMAN	NEDD8 activating enzyme E1 regulatory subunit OS Homo sapiens GN NAE1 PE 1 SV 1	Regular	45.174	34.16	60702.7	8	4	42	4.31	10093	10498.5	2976	2.3517	0.1428	Red
3695	P57737	CORO7_HUMAN	Coronin 7 OS Homo sapiens GN CORO7 PE 1 SV 2	Regular	45.1502	34.12	101689	8	3	57	3.14	14912	10897	4245	2.441	0.2482	Red
6031	Q5T0W9	FA83B_HUMAN	Protein FAM83B OS Homo sapiens GN FAM83B PE 1 SV 1	Regular	45.0402	34.23	115256	11	6	84	1.98	26171	12336	7756	2.7633	0.3185	Red
14993	Q9P2E9	RRBP1_HUMAN	Ribosome binding protein 1 OS Homo sapiens GN RRBP1 PE 1 SV 4	Regular	44.9994	34.19	152872	27	13	178	2.77	72267	27455	23014	6.1501	0.9402	Red
4967	O75417	DPOLQ_HUMAN	DNA polymerase theta OS Homo sapiens GN POLQ PE 1 SV 2	Regular	44.9952	34.15	292471	31	14	214	2.97	77257	11747	19218	2.6314	0.7696	Red
5117	Q9P225	DYH2_HUMAN	Dynein heavy chain 2 axonemal OS Homo sapiens GN DNAH2 PE 1 SV 3	Regular	44.9799	34.12	511121	63	36	364	2.91	196079	24238	62079	5.4294	2.7751	Red	618
8551	P06756	ITAV_HUMAN	Integrin alpha V OS Homo sapiens GN ITGAV PE 1 SV 2	Regular	44.9608	34.15	117122	23	10	79	1.53	56766	7800	23503	1.7472	0.2046	Red	36711 18692
19404	Q9H869	YYAP1_HUMAN	YY1 associated protein 1 OS Homo sapiens GN YY1AP1 PE 1 SV 2	Regular	44.9555	34.12	88856.7	8	5	51	3.77	24742	0	13271			Red	7116
5598	Q9NY74	ETAA1_HUMAN	Ewing s tumor associated antigen 1 OS Homo sapiens GN ETAA1 PE 1 SV 2	Regular	44.9529	34.08	104524	15	8	71	3.13	11663	4794	13072	1.0739	0.1122	Red
4503	Q66K64	DCA15_HUMAN	DDB1 and CUL4 associated factor 15 OS Homo sapiens GN DCAF15 PE 1 SV 1	Regular	44.9488	34.04	67433	2	1	39	4.33	1091	3273	1494	0.7332	0.0494	Red
11818	Q14980	NUMA1_HUMAN	Nuclear mitotic apparatus protein 1 OS Homo sapiens GN NUMA1 PE 1 SV 2	Regular	44.747	34.22	239343	25	17	209	2.27	96364	36980	17968	8.2837	1.9827	Red
18628	Q9UPW8	UN13A_HUMAN	Protein unc 13 homolog A OS Homo sapiens GN UNC13A PE 2 SV 4	Regular	44.6417	34.18	195010	17	10	154	3.58	88961	6106.69	15720	1.3679	0.2668	Red	18629 18630
9164	Q93100	KPBB_HUMAN	Phosphorylase b kinase regulatory subunit beta OS Homo sapiens GN PHKB PE 1 SV 3	Regular	44.6201	34.14	126025	11	7	80	2.29	46938	31228.5	13901	6.9953	0.8816	Red
616	Q13023	AKAP6_HUMAN	A kinase anchor protein 6 OS Homo sapiens GN AKAP6 PE 1 SV 3	Regular	44.4356	34.18	259344	19	12	162	0.78	40564	6228	15828	1.3951	0.3618	Red
8807	Q674X7	KAZRN_HUMAN	Kazrin OS Homo sapiens GN KAZN PE 1 SV 2	Regular	44.4341	34.14	86807.6	11	7	73	3.1	43174	5128	4278	1.1487	0.0997	Red
6378	Q68DA7	FMN1_HUMAN	Formin 1 OS Homo sapiens GN FMN1 PE 1 SV 3	Regular	44.3088	34.11	158890	21	11	136	2.75	134376	80756	24576	18.0898	2.8743	Red	18114 9407
16328	A6NJR5	SPDL3_HUMAN	Putative speedy protein like protein 3 OS Homo sapiens PE 5 SV 3	Regular	44.2298	34.14	34984	3	3	27	3.1	7563	5052	2436	1.1317	0.0396	Red
3938	P23508	CRCM_HUMAN	Colorectal mutant cancer protein OS Homo sapiens GN MCC PE 1 SV 2	Regular	44.1905	34.1	93882.9	16	7	75	2.65	31693	6019.5	11315	1.3484	0.1266	Red
16100	P53814	SMTN_HUMAN	Smoothelin OS Homo sapiens GN SMTN PE 1 SV 7	Regular	44.1323	34.14	99572.1	11	6	84	1.96	32028	26164.5	4217	5.861	0.5836	Red
1513	O94812	BAIP3_HUMAN	BAI1 associated protein 3 OS Homo sapiens GN BAIAP3 PE 1 SV 2	Regular	44.0732	34.1	133212	6	5	75	1.77	9955	6412.5	3073	1.4364	0.1914	Red
10935	Q8TBZ2	MYBPP_HUMAN	MYCBP associated protein OS Homo sapiens GN MYCBPAP PE 1 SV 2	Regular	44.0523	34.06	108666	7	7	83	2.01	27439	8860.5	6429	1.9848	0.2157	Red
1762	Q6RI45	BRWD3_HUMAN	Bromodomain and WD repeat containing protein 3 OS Homo sapiens GN BRWD3 PE 1 SV 2	Regular	44.0473	34.03	205366	24	13	129	3.39	87907	52831.4	20933	11.8345	2.4304	Red	13073
12812	O95613	PCNT_HUMAN	Pericentrin OS Homo sapiens GN PCNT PE 1 SV 4	Regular	44.0208	33.99	380832	48	28	342	2.01	121655	12453	36205	2.7895	1.0623	Red	7565 18095 8780 2770
19093	A4UGR9	XIRP2_HUMAN	Xin actin binding repeat containing protein 2 OS Homo sapiens GN XIRP2 PE 1 SV 2	Regular	43.9982	34.03	384125	44	24	302	2.25	141534	25902	46777	5.8022	2.2288	Red	5124
10729	Q5VT25	MRCKA_HUMAN	Serine threonine protein kinase MRCK alpha OS Homo sapiens GN CDC42BPA PE 1 SV 1	Regular	43.9773	33.99	199474	21	12	159	1.85	31755	6683	14549	1.497	0.2986	Red
9013	P46013	KI67_HUMAN	Antigen KI 67 OS Homo sapiens GN MKI67 PE 1 SV 2	Regular	43.9361	34.09	360918	33	19	333	1.81	116384	51779	33738	11.5988	4.1862	Red
10706	Q99550	MPP9_HUMAN	M phase phosphoprotein 9 OS Homo sapiens GN MPHOSPH9 PE 1 SV 3	Regular	43.9313	34.06	116705	9	7	83	3.3	168666	190088	13598	42.5806	4.9694	Red
2390	A6NC98	CC88B_HUMAN	Coiled coil domain containing protein 88B OS Homo sapiens GN CCDC88B PE 1 SV 1	Regular	43.9229	34.02	165266	18	15	154	4.95	80394	17517	21581	3.9239	0.6485	Red
16877	Q5ST30	SYVM_HUMAN	Valine tRNA ligase mitochondrial OS Homo sapiens GN VARS2 PE 1 SV 2	Regular	43.8847	33.99	119631	8	4	71	2.45	19765	21547.5	5723	4.8268	0.5774	Red
4679	Q9Y6T7	DGKB_HUMAN	Diacylglycerol kinase beta OS Homo sapiens GN DGKB PE 2 SV 2	Regular	43.8294	33.95	92192.3	4	4	48	1.99	13283	6531	4615	1.463	0.1349	Red
10965	P12883	MYH7_HUMAN	Myosin 7 OS Homo sapiens GN MYH7 PE 1 SV 5	Regular	43.7735	34.05	223896	37	19	161	2.38	111992	3070.57	25091	0.6878	0.154	Red	10962 10961 10966 10956 10963 10964 10960 10959
12079	P10515	ODP2_HUMAN	Dihydrolipoyllysine residue acetyltransferase component of pyruvate dehydrogenase complex mitochond	Regular	43.7403	34.02	69510	6	3	44	4.48	18204	10002	3312	2.2405	0.1557	Red
18019	Q07283	TRHY_HUMAN	Trichohyalin OS Homo sapiens GN TCHH PE 1 SV 2	Regular	43.701	33.98	254382	16	7	224	3.6	71264	46994	22224	10.5269	2.6779	Red
8364	Q9NXR8	ING3_HUMAN	Inhibitor of growth protein 3 OS Homo sapiens GN ING3 PE 1 SV 2	Regular	43.6806	34.02	47256	3	3	34	7.89	10887	2604	4435	0.5833	0.0276	Red
19599	Q96KR1	ZFR_HUMAN	Zinc finger RNA binding protein OS Homo sapiens GN ZFR PE 1 SV 2	Regular	43.5659	33.98	118153	23	11	71	5.87	139435	8554	21124	1.9161	0.2264	Red	23676 23828 18250 37033 13009 4369 28972 11558 8327 39644 16019 25347 31823 30064
1261	P50993	AT1A2_HUMAN	Sodium potassium transporting ATPase subunit alpha 2 OS Homo sapiens GN ATP1A2 PE 1 SV 1	Regular	43.4006	34.08	113577	12	5	76	0.88	58831	48858	7131	10.9445	1.243	Red
11011	Q5VU43	MYOME_HUMAN	Myomegalin OS Homo sapiens GN PDE4DIP PE 2 SV 1	Regular	43.3929	34.05	266506	32	21	217	3.67	85710	26240	20426	5.8779	1.5665	Red
6611	Q7L622	G2E3_HUMAN	G2 M phase specific E3 ubiquitin protein ligase OS Homo sapiens GN G2E3 PE 1 SV 1	Regular	43.3611	34.08	82671.3	6	2	56	1.7	9565	6306	3422	1.4126	0.1168	Red
3584	Q14031	CO4A6_HUMAN	Collagen alpha 6 IV chain OS Homo sapiens GN COL4A6 PE 2 SV 3	Regular	43.2669	34.11	165005	20	10	93	2.9	145190	127465	29319	28.5528	4.7113	Red
2812	Q9NYQ7	CELR3_HUMAN	Cadherin EGF LAG seven pass G type receptor 3 OS Homo sapiens GN CELSR3 PE 1 SV 2	Regular	43.1469	34.21	363090	20	12	226	3.14	47641	26870	23012	6.019	2.1854	Red
11008	P52179	MYOM1_HUMAN	Myomesin 1 OS Homo sapiens GN MYOM1 PE 1 SV 2	Regular	43.1172	34.24	189109	33	21	148	3.68	81595	11489	20892	2.5736	0.4867	Red
13079	Q86UU1	PHLB1_HUMAN	Pleckstrin homology like domain family B member 1 OS Homo sapiens GN PHLDB1 PE 1 SV 1	Regular	42.9066	34.34	152132	12	6	113	1.89	41211	9526	8338	2.1339	0.3246	Red
20070	Q5CZA5	ZN805_HUMAN	Zinc finger protein 805 OS Homo sapiens GN ZNF805 PE 2 SV 3	Regular	42.9006	34.31	73139.3	8	6	40	3.03	47390	1817.88	5716	0.4072	0.0298	Red	19808 19942
16871	Q8TDW5	SYTL5_HUMAN	Synaptotagmin like protein 5 OS Homo sapiens GN SYTL5 PE 1 SV 1	Regular	42.8984	34.27	82207.3	8	4	57	1.23	11411	9450	4757	2.1169	0.174	Red
8604	P52333	JAK3_HUMAN	Tyrosine protein kinase JAK3 OS Homo sapiens GN JAK3 PE 1 SV 2	Regular	42.6995	34.24	126924	13	7	94	1.96	90605	12295.5	19492	2.7543	0.3496	Red
9412	P55268	LAMB2_HUMAN	Laminin subunit beta 2 OS Homo sapiens GN LAMB2 PE 1 SV 2	Regular	42.6601	34.2	203110	14	9	130	2.61	106251	82486	29946	18.4773	3.7529	Red
5112	Q96DT5	DYH11_HUMAN	Dynein heavy chain 11 axonemal OS Homo sapiens GN DNAH11 PE 1 SV 3	Regular	42.6312	34.23	525207	45	25	354	1.81	196187	11983	30643	2.6843	1.4098	Red	5115
9406	P25391	LAMA1_HUMAN	Laminin subunit alpha 1 OS Homo sapiens GN LAMA1 PE 1 SV 2	Regular	42.5079	34.27	346551	28	20	223	2.15	103860	11143	30790	2.4961	0.865	Red
1830	Q8IYA2	C144C_HUMAN	Coiled coil domain containing protein 144C OS Homo sapiens GN CCDC144C PE 2 SV 3	Regular	42.4487	34.36	144195	13	8	123	2.1	48446	14200.3	7086	3.1809	0.4587	Red	1828 20065
6593	Q9BQS8	FYCO1_HUMAN	FYVE and coiled coil domain containing protein 1 OS Homo sapiens GN FYCO1 PE 1 SV 3	Regular	42.3752	34.33	168694	21	12	150	3.18	36647	7645	12439	1.7125	0.2889	Red
5852	Q5VWN6	F208B_HUMAN	Protein FAM208B OS Homo sapiens GN FAM208B PE 1 SV 1	Regular	42.2999	34.36	271865	27	11	180	0.74	151947	6582	22583	1.4744	0.4008	Red
8501	O14654	IRS4_HUMAN	Insulin receptor substrate 4 OS Homo sapiens GN IRS4 PE 1 SV 1	Regular	42.0934	34.58	134794	10	5	100	1.67	38992	26353.5	7020	5.9033	0.7957	Red
19562	P15822	ZEP1_HUMAN	Zinc finger protein 40 OS Homo sapiens GN HIVEP1 PE 1 SV 3	Regular	42.0494	34.55	299488	23	12	171	2.83	44364	8028	18523	1.7983	0.5386	Red	19563
14241	Q8IUD2	RB6I2_HUMAN	ELKS Rab6 interacting CAST family member 1 OS Homo sapiens GN ERC1 PE 1 SV 1	Regular	41.9909	34.58	128315	20	9	132	2.6	500408	691384	32835	154.874	19.8726	Red
1018	Q96P48	ARAP1_HUMAN	Arf GAP with Rho GAP domain ANK repeat and PH domain containing protein 1 OS Homo sapiens GN ARAP1	Regular	41.9769	34.55	163846	15	10	109	4.62	112770	28523	12295	6.3893	1.0469	Red
11198	Q15788	NCOA1_HUMAN	Nuclear receptor coactivator 1 OS Homo sapiens GN NCOA1 PE 1 SV 3	Regular	41.7675	34.77	158069	17	8	87	1.39	65795	13095	8948	2.9333	0.4637	Red
7609	Q86WZ0	HEAT4_HUMAN	HEAT repeat containing protein 4 OS Homo sapiens GN HEATR4 PE 1 SV 2	Regular	41.7443	34.8	118031	8	6	92	1.27	20332	10392	6039	2.3279	0.2748	Red
14892	Q9HCK4	ROBO2_HUMAN	Roundabout homolog 2 OS Homo sapiens GN ROBO2 PE 1 SV 2	Regular	41.5416	34.83	152055	15	11	94	3.27	41810	10184	13210	2.2813	0.3469	Red
12725	Q9P2E7	PCD10_HUMAN	Protocadherin 10 OS Homo sapiens GN PCDH10 PE 2 SV 2	Regular	41.5234	34.8	114305	11	5	73	5.1	10960	5272.5	7033	1.1811	0.135	Red
14820	Q63HN8	RN213_HUMAN	E3 ubiquitin protein ligase RNF213 OS Homo sapiens GN RNF213 PE 1 SV 3	Regular	41.5119	34.76	598936	48	36	438	3.73	130877	14476	38368	3.2427	1.9422	Red
19647	Q5VZL5	ZMYM4_HUMAN	Zinc finger MYM type protein 4 OS Homo sapiens GN ZMYM4 PE 1 SV 1	Regular	41.4701	34.73	176267	12	11	125	5.04	35313	19546	10291	4.3784	0.7718	Red	10644 1590 14135 24992 18790
15678	Q02383	SEMG2_HUMAN	Semenogelin 2 OS Homo sapiens GN SEMG2 PE 1 SV 1	Regular	41.3145	34.88	65558.6	5	3	50	1.89	16207	32391	5301	7.2558	0.4757	Red
9020	Q9NS87	KIF15_HUMAN	Kinesin like protein KIF15 OS Homo sapiens GN KIF15 PE 1 SV 1	Regular	41.2953	34.85	161130	26	13	132	4.9	38073	6925	13109	1.5512	0.25	Red
18754	Q96JH7	VCIP1_HUMAN	Deubiquitinating protein VCIP135 OS Homo sapiens GN VCPIP1 PE 1 SV 2	Regular	41.0654	35.07	135689	11	6	110	1.31	45486	68967	26433	15.449	2.0963	Red
1637	Q9Y6D6	BIG1_HUMAN	Brefeldin A inhibited guanine nucleotide exchange protein 1 OS Homo sapiens GN ARFGEF1 PE 1 SV 2	Regular	40.9947	35.03	210992	32	16	132	3.62	38654	5559.15	15404	1.2453	0.2627	Red	1638
4907	Q96HP0	DOCK6_HUMAN	Dedicator of cytokinesis protein 6 OS Homo sapiens GN DOCK6 PE 1 SV 3	Regular	40.7669	35.25	231440	23	15	158	2.49	132416	10432.6	27310	2.337	0.5409	Red	4908
15977	Q5T5P2	SKT_HUMAN	Sickle tail protein homolog OS Homo sapiens GN SKT PE 1 SV 2	Regular	40.5508	35.52	214743	26	16	160	2.01	63429	15107	35635	3.384	0.7267	Red
13863	O00233	PSMD9_HUMAN	26S proteasome non ATPase regulatory subunit 9 OS Homo sapiens GN PSMD9 PE 1 SV 3	Regular	40.3389	35.49	24852.9	4	3	20	9.42	18584	13113	4504	2.9374	0.073	Red
5519	Q15303	ERBB4_HUMAN	Receptor tyrosine protein kinase erbB 4 OS Homo sapiens GN ERBB4 PE 1 SV 1	Regular	40.3039	35.46	150116	6	5	95	4.36	30230	15029	3845	3.3666	0.5054	Red
20232	O43149	ZZEF1_HUMAN	Zinc finger ZZ type and EF hand domain containing protein 1 OS Homo sapiens GN ZZEF1 PE 1 SV 6	Regular	40.2947	35.42	335980	21	11	210	1.69	53609	12225	18522	2.7385	0.9201	Red
9431	Q659C4	LAR1B_HUMAN	La related protein 1B OS Homo sapiens GN LARP1B PE 1 SV 2	Regular	40.2646	35.39	105836	7	8	78	4.05	36624	18668	9859	4.1817	0.4426	Red
13677	Q8TCU6	PREX1_HUMAN	Phosphatidylinositol 3 4 5 trisphosphate dependent Rac exchanger 1 protein OS Homo sapiens GN PREX1	Regular	40.247	35.36	188884	19	13	130	1.87	69590	16021.5	18382	3.5889	0.6779	Red
11042	O75113	N4BP1_HUMAN	NEDD4 binding protein 1 OS Homo sapiens GN N4BP1 PE 1 SV 4	Regular	40.2398	35.32	101291	6	8	80	1.67	28538	2568	5969	0.5752	0.0583	Red
763	Q5JPF3	AN36C_HUMAN	Ankyrin repeat domain containing protein 36C OS Homo sapiens GN ANKRD36C PE 2 SV 3	Regular	40.1929	35.29	201516	20	14	187	3.15	44995	8157.93	16116	1.8274	0.3683	Red	761
5656	Q8NEV8	EXPH5_HUMAN	Exophilin 5 OS Homo sapiens GN EXPH5 PE 1 SV 3	Regular	40.1201	35.38	223888	20	17	175	1.51	60748	6050	19554	1.3552	0.3034	Red
16019	Q14BN4	SLMAP_HUMAN	Sarcolemmal membrane associated protein OS Homo sapiens GN SLMAP PE 1 SV 1	Regular	40.095	35.4	96053.8	10	7	102	3.62	45455	9429	15111	2.1121	0.2029	Red	19599 23676 23828 18250 37033 13009 4369 28972 11558 8327 39644 25347 31823 30064
10304	P21439	MDR3_HUMAN	Multidrug resistance protein 3 OS Homo sapiens GN ABCB4 PE 1 SV 2	Regular	39.9435	35.49	142094	16	9	89	3.27	23424	4346.5	9977	0.9736	0.1383	Red	10303
18853	Q9H270	VPS11_HUMAN	Vacuolar protein sorting associated protein 11 homolog OS Homo sapiens GN VPS11 PE 1 SV 1	Regular	39.7577	35.58	109148	9	4	83	4.46	12052	9676	3836	2.1675	0.2366	Red
15822	Q9NRF2	SH2B1_HUMAN	SH2B adapter protein 1 OS Homo sapiens GN SH2B1 PE 1 SV 3	Regular	39.6313	35.61	79822.8	9	5	40	2.25	84512	114656	10183	25.6834	2.0501	Red
13509	P37231	PPARG_HUMAN	Peroxisome proliferator activated receptor gamma OS Homo sapiens GN PPARG PE 1 SV 3	Regular	39.4351	35.75	58190.6	7	6	28	4.16	34797	8892	6920	1.9919	0.1159	Red
15688	Q9BQF6	SENP7_HUMAN	Sentrin specific protease 7 OS Homo sapiens GN SENP7 PE 1 SV 4	Regular	39.4064	35.78	120741	12	7	76	0.67	42489	22545	12021	5.0502	0.6098	Red
18281	Q9UNY4	TTF2_HUMAN	Transcription termination factor 2 OS Homo sapiens GN TTF2 PE 1 SV 2	Regular	39.3751	35.75	130843	14	9	104	1.64	30811	13684.5	14841	3.0654	0.4011	Red
10316	Q93074	MED12_HUMAN	Mediator of RNA polymerase II transcription subunit 12 OS Homo sapiens GN MED12 PE 1 SV 4	Regular	39.3649	35.71	245819	25	11	144	4.04	228944	18879	45917	4.229	1.0396	Red	5431
10983	Q9UKN7	MYO15_HUMAN	Unconventional myosin XV OS Homo sapiens GN MYO15A PE 1 SV 2	Regular	39.3045	35.74	397859	39	21	251	0.54	115659	12469.5	32965	2.7932	1.1113	Red	13978
12465	Q6IE37	OVOS1_HUMAN	Ovostatin homolog 1 OS Homo sapiens GN OVOS1 PE 2 SV 2	Regular	39.2856	35.71	136324	12	6	77	3.04	49975	39933	6414	8.9452	1.2194	Red	23573 2372 11139
10152	P27816	MAP4_HUMAN	Microtubule associated protein 4 OS Homo sapiens GN MAP4 PE 1 SV 3	Regular	39.281	35.67	121518	11	10	133	5.73	22398	9793	10105	2.1937	0.2666	Red
5122	Q96JB1	DYH8_HUMAN	Dynein heavy chain 8 axonemal OS Homo sapiens GN DNAH8 PE 1 SV 2	Regular	39.2692	35.64	518315	48	27	367	1.8	119717	59566	38521	13.3431	6.9159	Red	5123 5115 5119
2769	Q8TEP8	CE192_HUMAN	Centrosomal protein of 192 kDa OS Homo sapiens GN CEP192 PE 1 SV 2	Regular	39.2312	35.61	215313	19	10	124	2.11	42808	22737	11607	5.0932	1.0966	Red
9297	Q9NSB2	KRT84_HUMAN	Keratin type II cuticular Hb4 OS Homo sapiens GN KRT84 PE 1 SV 2	Regular	39.1724	35.58	65983	13	6	47	3.83	20228	4677	13970	1.0477	0.0691	Red
13349	Q9HCM2	PLXA4_HUMAN	Plexin A4 OS Homo sapiens GN PLXNA4 PE 1 SV 4	Regular	39.118	35.54	215820	15	9	126	2.64	54612	12452.2	13149	2.7894	0.602	Red	13346 13348 13347
10502	Q9NXC5	MIO_HUMAN	WD repeat containing protein mio OS Homo sapiens GN MIOS PE 1 SV 2	Regular	38.9423	35.63	100295	10	5	71	1.71	32449	53964	7293	12.0882	1.2124	Red
9699	P18054	LOX12_HUMAN	Arachidonate 12 lipoxygenase 12S type OS Homo sapiens GN ALOX12 PE 1 SV 4	Regular	38.9228	35.6	76663.7	7	4	56	3.17	32574	25794	6440	5.778	0.443	Red
8745	P12035	K2C3_HUMAN	Keratin type II cytoskeletal 3 OS Homo sapiens GN KRT3 PE 1 SV 3	Regular	38.9171	35.56	64588.2	14	7	43	3.5	71265	5652	12802	1.2661	0.0818	Red
14501	O14715	RGPD8_HUMAN	RANBP2 like and GRIP domain containing protein 8 OS Homo sapiens GN RGPD8 PE 1 SV 2	Regular	38.8787	35.53	200305	28	13	136	3.23	183498	5422.29	53851	1.2146	0.2433	Green	14304 14498
13591	Q5THK1	PR14L_HUMAN	Protein PRR14L OS Homo sapiens GN PRR14L PE 1 SV 1	Regular	38.8329	35.56	241292	15	12	215	2.32	66804	25248	12756	5.6557	1.3647	Red
6034	Q2M2I3	FA83E_HUMAN	Protein FAM83E OS Homo sapiens GN FAM83E PE 2 SV 2	Regular	38.6749	35.76	52008	10	6	35	3.35	15518	3615	5499	0.8098	0.0421	Red
588	Q12904	AIMP1_HUMAN	Aminoacyl tRNA synthase complex interacting multifunctional protein 1 OS Homo sapiens GN AIMP1 PE 1	Regular	38.5765	35.79	34637.9	5	3	27	8.65	13026	11308.5	4673	2.5332	0.0877	Red
13695	P78527	PRKDC_HUMAN	DNA dependent protein kinase catalytic subunit OS Homo sapiens GN PRKDC PE 1 SV 3	Regular	38.5517	35.75	474051	48	27	352	2.98	97530	34036	46853	7.6242	3.6143	Red
17431	Q13009	TIAM1_HUMAN	T lymphoma invasion and metastasis inducing protein 1 OS Homo sapiens GN TIAM1 PE 1 SV 2	Regular	38.5486	35.72	178820	24	14	134	2.45	189077	15035	30768	3.3679	0.6023	Red
5115	Q9UFH2	DYH17_HUMAN	Dynein heavy chain 17 axonemal OS Homo sapiens GN DNAH17 PE 2 SV 2	Regular	38.5012	35.86	515609	49	30	374	1.43	121462	9781	33281	2.191	1.1297	Red	5112 5122 5123 5119
13279	Q9P212	PLCE1_HUMAN	1 phosphatidylinositol 4 5 bisphosphate phosphodiesterase epsilon 1 OS Homo sapiens GN PLCE1 PE 1 SV	Regular	38.4539	35.89	261909	24	12	164	3.61	71205	37115	11718	8.314	2.1775	Red
18132	Q96QT4	TRPM7_HUMAN	Transient receptor potential cation channel subfamily M member 7 OS Homo sapiens GN TRPM7 PE 1 SV 1	Regular	38.3496	35.91	214807	14	10	142	1.66	28857	10776	10399	2.4139	0.5185	Red	18131
1985	Q9NY47	CA2D2_HUMAN	Voltage dependent calcium channel subunit alpha 2 delta 2 OS Homo sapiens GN CACNA2D2 PE 1 SV 2	Regular	38.3106	35.88	131015	7	5	87	4.7	20202	6068	5811	1.3593	0.1781	Red
2766	O94986	CE152_HUMAN	Centrosomal protein of 152 kDa OS Homo sapiens GN CEP152 PE 1 SV 3	Regular	38.3092	35.85	191124	17	12	158	2.9	62901	20294	31290	4.546	0.8688	Red
9019	Q15058	KIF14_HUMAN	Kinesin like protein KIF14 OS Homo sapiens GN KIF14 PE 1 SV 1	Regular	38.1776	35.87	187861	18	14	141	3.64	83835	39522	20289	8.8531	1.6632	Red
6794	Q14397	GCKR_HUMAN	Glucokinase regulatory protein OS Homo sapiens GN GCKR PE 1 SV 6	Regular	38.1181	35.9	69198.6	6	3	43	3.68	16503	16146	2317	3.6168	0.2503	Red
9870	P22888	LSHR_HUMAN	Lutropin choriogonadotropic hormone receptor OS Homo sapiens GN LHCGR PE 1 SV 4	Regular	38.0578	35.92	80068.8	4	4	47	4.29	9397	10642.5	4086	2.384	0.1909	Red
16480	Q9C0H9	SRCN1_HUMAN	SRC kinase signaling inhibitor 1 OS Homo sapiens GN SRCIN1 PE 1 SV 3	Regular	38.0343	35.95	112739	22	9	96	2.65	44051	16168.5	14097	3.6218	0.4083	Red
10958	Q9Y2K3	MYH15_HUMAN	Myosin 15 OS Homo sapiens GN MYH15 PE 1 SV 5	Regular	38.0059	35.92	226045	32	19	170	4.47	71805	18392	25847	4.1199	0.9313	Red
1956	Q5RHP9	CA173_HUMAN	Uncharacterized protein C1orf173 OS Homo sapiens GN C1orf173 PE 2 SV 1	Regular	37.9508	35.89	169151	10	9	165	1.57	111090	16474.5	20595	3.6904	0.6242	Red
18549	Q5T4S7	UBR4_HUMAN	E3 ubiquitin protein ligase UBR4 OS Homo sapiens GN UBR4 PE 1 SV 1	Regular	37.7968	35.91	580913	40	27	368	2.26	243294	82531	37171	18.4874	10.7396	Red	7106 29277
9837	O75581	LRP6_HUMAN	Low density lipoprotein receptor related protein 6 OS Homo sapiens GN LRP6 PE 1 SV 2	Regular	37.6495	36.11	183452	15	10	105	1.8	50835	4582	10807	1.0264	0.1883	Red
8699	Q9BY89	K1671_HUMAN	Uncharacterized protein KIAA1671 OS Homo sapiens GN KIAA1671 PE 1 SV 2	Regular	37.5556	36.19	197738	29	13	165	3.99	63566	19116	24677	4.2821	0.8467	Red
3593	P12111	CO6A3_HUMAN	Collagen alpha 3 VI chain OS Homo sapiens GN COL6A3 PE 1 SV 5	Regular	37.4017	36.27	345381	29	21	237	3.02	99345	9032	27547	2.0232	0.6988	Red
3616	O75128	COBL_HUMAN	Protein cordon bleu OS Homo sapiens GN COBL PE 1 SV 2	Regular	37.3727	36.24	136529	13	10	98	4.04	55056	14337	19730	3.2116	0.4385	Red
3403	Q9H078	CLPB_HUMAN	Caseinolytic peptidase B protein homolog OS Homo sapiens GN CLPB PE 1 SV 1	Regular	37.3464	36.2	79242.2	9	6	59	1.27	21906	4164	4488	0.9328	0.0739	Red
8727	Q7Z3Y8	K1C27_HUMAN	Keratin type I cytoskeletal 27 OS Homo sapiens GN KRT27 PE 1 SV 2	Regular	37.2776	36.28	50449.7	2	3	34	6.54	8637	6201	4114	1.3891	0.0701	Red
17272	P22105	TENX_HUMAN	Tenascin X OS Homo sapiens GN TNXB PE 1 SV 3	Regular	37.1763	36.31	471340	31	21	325	3.05	479036	112253	78896	25.1453	11.852	Red
16372	Q2M3C7	SPKAP_HUMAN	A kinase anchor protein SPHKAP OS Homo sapiens GN SPHKAP PE 1 SV 1	Regular	36.9649	36.39	189194	15	12	142	2.59	95168	16985	21184	3.8047	0.7198	Red
14935	P24928	RPB1_HUMAN	DNA directed RNA polymerase II subunit RPB1 OS Homo sapiens GN POLR2A PE 1 SV 2	Regular	36.9207	36.41	218545	22	12	132	1.47	69566	26574	13177	5.9527	1.3009	Red
370	Q96CM8	ACSF2_HUMAN	Acyl CoA synthetase family member 2 mitochondrial OS Homo sapiens GN ACSF2 PE 1 SV 2	Regular	36.91	36.38	69037.4	8	8	41	3.25	15932	3922.5	5348	0.8787	0.0607	Red
232	O95342	ABCBB_HUMAN	Bile salt export pump OS Homo sapiens GN ABCB11 PE 1 SV 2	Regular	36.8732	36.35	147548	17	10	90	0.91	29623	3348	21670	0.75	0.1107	Red
14850	Q9BXT8	RNF17_HUMAN	RING finger protein 17 OS Homo sapiens GN RNF17 PE 1 SV 3	Regular	36.8172	36.32	187324	17	13	122	3.39	65802	16322	21105	3.6562	0.6849	Red
8467	Q9NWZ3	IRAK4_HUMAN	Interleukin 1 receptor associated kinase 4 OS Homo sapiens GN IRAK4 PE 1 SV 1	Regular	36.8052	36.34	51986.1	8	4	46	3.7	43254	49515	13580	11.0916	0.5766	Red
7105	Q08378	GOGA3_HUMAN	Golgin subfamily A member 3 OS Homo sapiens GN GOLGA3 PE 1 SV 2	Regular	36.7406	36.47	167868	13	9	146	1.87	63915	4788	8260	1.0725	0.18	Red
18536	Q70EL1	UBP54_HUMAN	Inactive ubiquitin carboxyl terminal hydrolase 54 OS Homo sapiens GN USP54 PE 1 SV 4	Regular	36.7274	36.5	189727	16	12	132	3.03	45283	6633	13585	1.4858	0.2819	Red
3617	Q99715	COCA1_HUMAN	Collagen alpha 1 XII chain OS Homo sapiens GN COL12A1 PE 1 SV 2	Regular	36.6975	36.52	334345	30	22	204	2.94	97044	17877	26162	4.0045	1.3389	Red
11141	Q6ZS30	NBEL1_HUMAN	Neurobeachin like protein 1 OS Homo sapiens GN NBEAL1 PE 2 SV 3	Regular	36.5351	36.54	310431	24	12	187	2.23	161696	101825	70896	22.8093	7.0807	Red
3594	A8TX70	CO6A5_HUMAN	Collagen alpha 5 VI chain OS Homo sapiens GN COL6A5 PE 1 SV 1	Regular	36.527	36.51	291979	29	16	217	2.18	134138	19068	35682	4.2713	1.2471	Red
10989	O94832	MYO1D_HUMAN	Unconventional myosin Id OS Homo sapiens GN MYO1D PE 1 SV 2	Regular	36.5086	36.48	117001	12	10	89	3.08	28385	3188.45	12611	0.7142	0.0836	Red	10992
523	P55196	AFAD_HUMAN	Afadin OS Homo sapiens GN MLLT4 PE 1 SV 3	Regular	36.4521	36.45	207831	41	17	147	1.86	249289	10789.5	56496	2.4169	0.5023	Red
18066	A6NGJ6	TRI64_HUMAN	Tripartite motif containing protein 64 OS Homo sapiens GN TRIM64 PE 2 SV 4	Regular	36.3393	36.42	52764	6	2	33	2.9	10347	3558	5011	0.797	0.0421	Red
9160	P01042	KNG1_HUMAN	Kininogen 1 OS Homo sapiens GN KNG1 PE 1 SV 2	Regular	36.2834	36.39	73041	4	4	61	5.9	6448	5033	2713	1.1274	0.0823	Red
15806	Q562F6	SGOL2_HUMAN	Shugoshin like 2 OS Homo sapiens GN SGOL2 PE 1 SV 2	Regular	36.2163	36.36	145880	20	10	138	3	51141	16093	21449	3.6049	0.5259	Red
9161	P50748	KNTC1_HUMAN	Kinetochore associated protein 1 OS Homo sapiens GN KNTC1 PE 1 SV 1	Regular	36.1214	36.49	253372	26	16	173	1.86	182236	107948	38721	24.1809	6.1268	Red
5124	Q14204	DYHC1_HUMAN	Cytoplasmic dynein 1 heavy chain 1 OS Homo sapiens GN DYNC1H1 PE 1 SV 5	Regular	36.0973	36.46	535146	62	38	379	2.82	124472	18914	44434	4.2368	2.2673	Red	19093
13314	Q9NYY3	PLK2_HUMAN	Serine threonine protein kinase PLK2 OS Homo sapiens GN PLK2 PE 1 SV 3	Regular	35.9959	36.48	79320.2	7	3	57	1.61	10356	9723	8246	2.178	0.1728	Red
15876	Q9ULL8	SHRM4_HUMAN	Protein Shroom4 OS Homo sapiens GN SHROOM4 PE 1 SV 3	Regular	35.9742	36.5	167139	12	8	97	2.08	32974	14199	9196	3.1807	0.5316	Red
2369	Q96MC2	CC164_HUMAN	Coiled coil domain containing protein 164 OS Homo sapiens GN CCDC164 PE 2 SV 2	Regular	35.9176	36.47	87533.5	3	4	65	4.59	18924	4766	6583	1.0676	0.0935	Red
1358	Q04656	ATP7A_HUMAN	Copper transporting ATPase 1 OS Homo sapiens GN ATP7A PE 1 SV 3	Regular	35.8046	36.49	164857	5	4	90	1.87	20001	14736	5517	3.3009	0.5442	Red
16445	O15020	SPTN2_HUMAN	Spectrin beta chain non erythrocytic 2 OS Homo sapiens GN SPTBN2 PE 1 SV 3	Regular	35.7432	36.46	272694	27	21	221	1.72	115288	13166	30092	2.9493	0.8042	Red	16438 16439 16446
15171	P21817	RYR1_HUMAN	Ryanodine receptor 1 OS Homo sapiens GN RYR1 PE 1 SV 3	Regular	35.6804	36.54	570879	48	27	357	2.56	132840	28327	35698	6.3454	3.6225	Red	15173 15172
18308	Q9BSA4	TTYH2_HUMAN	Protein tweety homolog 2 OS Homo sapiens GN TTYH2 PE 1 SV 3	Regular	35.6454	36.56	59856	5	1	27	1.5	271104	813312	24063	182.186	10.9049	Red
7301	Q3V6T2	GRDN_HUMAN	Girdin OS Homo sapiens GN CCDC88A PE 1 SV 2	Regular	35.4783	36.64	216726	18	15	178	3.1	59568	21619	15319	4.8428	1.0496	Red
3437	Q8N3K9	CMYA5_HUMAN	Cardiomyopathy associated protein 5 OS Homo sapiens GN CMYA5 PE 1 SV 3	Regular	35.4243	36.61	451036	28	20	347	2.9	82593	23256	33759	5.2095	2.3497	Red
2150	P42574	CASP3_HUMAN	Caspase 3 OS Homo sapiens GN CASP3 PE 1 SV 2	Regular	35.3593	36.58	32064.2	9	4	27	10.11	16789	5247	4904	1.1754	0.0377	Red
3579	P02462	CO4A1_HUMAN	Collagen alpha 1 IV chain OS Homo sapiens GN COL4A1 PE 1 SV 3	Regular	35.1174	36.6	161756	19	9	89	3.71	31806	3354	9233	0.7513	0.1215	Red
5118	Q8TD57	DYH3_HUMAN	Dynein heavy chain 3 axonemal OS Homo sapiens GN DNAH3 PE 2 SV 1	Regular	35.0215	36.57	474080	55	29	343	1.26	145227	26304	51878	5.8922	2.7934	Red	21968 5121 2375
1507	Q9P281	BAHC1_HUMAN	BAH and coiled coil domain containing protein 1 OS Homo sapiens GN BAHCC1 PE 1 SV 3	Regular	34.8488	36.64	279726	24	15	169	2.15	147039	20375	18604	4.5641	1.2767	Red
11417	Q6T4R5	NHS_HUMAN	Nance Horan syndrome protein OS Homo sapiens GN NHS PE 1 SV 1	Regular	34.7751	36.67	178012	8	7	108	1.96	40490	25386	9654	5.6866	1.0123	Red
5111	Q8IVF4	DYH10_HUMAN	Dynein heavy chain 10 axonemal OS Homo sapiens GN DNAH10 PE 1 SV 4	Regular	34.7515	36.64	518035	65	34	370	2.37	174202	16970	41467	3.8014	1.9692	Red	7159
530	Q9UHB7	AFF4_HUMAN	AF4 FMR2 family member 4 OS Homo sapiens GN AFF4 PE 1 SV 1	Regular	34.7317	36.61	127859	7	5	105	4.39	41279	12813	7675	2.8702	0.367	Red
7911	Q86XA9	HTR5A_HUMAN	HEAT repeat containing protein 5A OS Homo sapiens GN HEATR5A PE 1 SV 2	Regular	34.7171	36.58	225312	13	7	148	0.83	35430	14382	7660	3.2216	0.7259	Red
14564	Q5T5U3	RHG21_HUMAN	Rho GTPase activating protein 21 OS Homo sapiens GN ARHGAP21 PE 1 SV 1	Regular	34.5663	36.6	218700	21	12	170	0.82	48161	13822	15258	3.0962	0.6771	Red
3016	Q8NE62	CHDH_HUMAN	Choline dehydrogenase mitochondrial OS Homo sapiens GN CHDH PE 2 SV 2	Regular	34.4127	36.72	66099.9	3	3	49	1.35	51826	2826	2583	0.633	0.0418	Red
3742	Q8IYS4	CP071_HUMAN	Uncharacterized protein C16orf71 OS Homo sapiens GN C16orf71 PE 2 SV 3	Regular	34.3864	36.75	56195.1	14	7	37	2.69	42207	5856	11383	1.3118	0.0737	Red
15470	Q6UVJ0	SAS6_HUMAN	Spindle assembly abnormal protein 6 homolog OS Homo sapiens GN SASS6 PE 1 SV 1	Regular	34.3508	36.82	74910	7	5	68	5.48	30032	18837	8154	4.2196	0.3161	Red
3378	Q9UDT6	CLIP2_HUMAN	CAP Gly domain containing linker protein 2 OS Homo sapiens GN CLIP2 PE 1 SV 1	Regular	34.1104	36.89	116294	19	12	100	2.96	61025	22968	17877	5.145	0.5983	Red	3377
16261	Q9Y5B9	SP16H_HUMAN	FACT complex subunit SPT16 OS Homo sapiens GN SUPT16H PE 1 SV 1	Regular	34.0351	36.92	120484	14	7	101	4.01	31075	13746	10982	3.0792	0.371	Red	10024
16934	P48775	T23O_HUMAN	Tryptophan 2 3 dioxygenase OS Homo sapiens GN TDO2 PE 1 SV 1	Regular	33.915	36.89	48042.7	9	4	38	2.22	6319	4398	3858	0.9852	0.0473	Red
4608	O95786	DDX58_HUMAN	Probable ATP dependent RNA helicase DDX58 OS Homo sapiens GN DDX58 PE 1 SV 2	Regular	33.8584	36.91	108083	15	10	86	5.08	48678	20439	10455	4.5784	0.4948	Red
968	P04114	APOB_HUMAN	Apolipoprotein B 100 OS Homo sapiens GN APOB PE 1 SV 2	Regular	33.8243	36.93	516974	54	38	351	2.48	189716	12836	60128	2.8753	1.4865	Red	27500
13353	O60486	PLXC1_HUMAN	Plexin C1 OS Homo sapiens GN PLXNC1 PE 1 SV 1	Regular	33.6805	37.05	178537	11	6	124	2.93	43230	12245	8141	2.7429	0.4897	Red
761	A6QL64	AN36A_HUMAN	Ankyrin repeat domain containing protein 36A OS Homo sapiens GN ANKRD36 PE 2 SV 3	Regular	33.632	37.02	219290	22	16	216	2.27	57314	5604.07	18705	1.2553	0.2753	Red	763
5174	P48664	EAA4_HUMAN	Excitatory amino acid transporter 4 OS Homo sapiens GN SLC1A6 PE 2 SV 1	Regular	33.6255	37.04	61679.7	2	2	28	2.3	14347	7767	2835	1.7398	0.1073	Red
18825	Q5THJ4	VP13D_HUMAN	Vacuolar protein sorting associated protein 13D OS Homo sapiens GN VPS13D PE 1 SV 1	Regular	33.6055	37.01	495609	38	21	334	1.5	114273	41246	22091	9.2393	4.5791	Red
18900	Q502W6	VWA3B_HUMAN	von Willebrand factor A domain containing protein 3B OS Homo sapiens GN VWA3B PE 2 SV 3	Regular	33.4503	37.09	147117	17	10	117	4.17	37985	16996	19449	3.8072	0.5601	Red
12728	Q96JQ0	PCD16_HUMAN	Protocadherin 16 OS Homo sapiens GN DCHS1 PE 2 SV 1	Regular	33.4369	37.11	346923	15	10	182	2.3	35800	12862	10043	2.8812	0.9995	Red
18989	Q9H967	WDR76_HUMAN	WD repeat containing protein 76 OS Homo sapiens GN WDR76 PE 1 SV 2	Regular	33.3172	37.28	70510.7	13	5	46	3.99	24984	15384	10366	3.4461	0.243	Red
16439	Q01082	SPTB2_HUMAN	Spectrin beta chain non erythrocytic 1 OS Homo sapiens GN SPTBN1 PE 1 SV 2	Regular	33.3048	37.25	275408	32	20	240	0.97	95400	1842.75	26717	0.4128	0.1137	Green	16438 16445 6627 16446
787	Q01484	ANK2_HUMAN	Ankyrin 2 OS Homo sapiens GN ANK2 PE 1 SV 4	Regular	33.0917	37.32	436224	46	24	326	2.3	135774	15991	37531	3.5821	1.5626	Red
9994	Q99698	LYST_HUMAN	Lysosomal trafficking regulator OS Homo sapiens GN LYST PE 1 SV 3	Regular	33.0656	37.34	434443	25	15	273	1.5	71735	20053	24863	4.492	1.9515	Red
12667	Q86W56	PARG_HUMAN	Poly ADP ribose glycohydrolase OS Homo sapiens GN PARG PE 1 SV 1	Regular	33.0518	37.31	112536	7	8	82	3.18	31321	11899	11126	2.6654	0.3	Red
13956	Q9UMZ3	PTPRQ_HUMAN	Phosphotidylinositol phosphatase PTPRQ OS Homo sapiens GN PTPRQ PE 1 SV 2	Regular	32.9769	37.33	262293	13	9	132	2.14	22859	4453	11631	0.9975	0.2616	Red
607	Q02952	AKA12_HUMAN	A kinase anchor protein 12 OS Homo sapiens GN AKAP12 PE 1 SV 4	Regular	32.9007	37.4	192052	22	11	164	2.3	37271	7691	20739	1.7228	0.3309	Red
11498	Q14957	NMDE3_HUMAN	Glutamate NMDA receptor subunit epsilon 3 OS Homo sapiens GN GRIN2C PE 2 SV 3	Regular	32.8473	37.42	135692	10	7	78	1.38	45503	42348	6207	9.4862	1.2872	Red
3012	Q8TD26	CHD6_HUMAN	Chromodomain helicase DNA binding protein 6 OS Homo sapiens GN CHD6 PE 1 SV 4	Regular	32.6388	37.59	308264	33	20	227	1.95	97090	9351	30301	2.0947	0.6457	Yellow
13109	P42356	PI4KA_HUMAN	Phosphatidylinositol 4 kinase alpha OS Homo sapiens GN PI4KA PE 1 SV 3	Regular	32.6229	37.56	233772	8	6	186	1.42	23875	9973.5	5683	2.2341	0.5223	Red
2771	Q5VT06	CE350_HUMAN	Centrosome associated protein 350 OS Homo sapiens GN CEP350 PE 1 SV 1	Regular	32.47	37.68	352527	36	22	278	1.48	112016	13322	24287	2.9842	1.052	Red
10998	Q9NQX4	MYO5C_HUMAN	Unconventional myosin Vc OS Homo sapiens GN MYO5C PE 1 SV 2	Regular	32.4354	37.65	204122	15	14	147	2.76	64549	11300	11536	2.5313	0.5167	Red
5828	Q5W0A0	F194B_HUMAN	Protein FAM194B OS Homo sapiens GN FAM194B PE 2 SV 1	Regular	32.3745	37.62	81856.8	6	3	77	1.58	7601	7869	3939	1.7627	0.1443	Red
14457	A6NLU0	RFPLA_HUMAN	Ret finger protein like 4A OS Homo sapiens GN RFPL4A PE 1 SV 3	Regular	32.3059	37.64	33036.6	6	2	23	5.23	3335	5002.5	3120	1.1206	0.037	Red
10966	P13535	MYH8_HUMAN	Myosin 8 OS Homo sapiens GN MYH8 PE 1 SV 3	Regular	32.0628	37.85	223732	29	11	158	1.03	105693	0	28252			Red	10962 10961 10956 10963 10964 10960 10959 10965
16828	O15061	SYNEM_HUMAN	Synemin OS Homo sapiens GN SYNM PE 1 SV 2	Regular	32.0401	37.82	173110	16	16	164	2.62	71822	7655	16560	1.7148	0.2968	Red
17003	Q13148	TADBP_HUMAN	TAR DNA binding protein 43 OS Homo sapiens GN TARDBP PE 1 SV 1	Regular	31.9911	37.79	45082.1	6	4	19	4.59	16670	20431.5	7290	4.5768	0.2063	Red
4737	Q9H2U1	DHX36_HUMAN	Probable ATP dependent RNA helicase DHX36 OS Homo sapiens GN DHX36 PE 1 SV 2	Regular	31.7833	38.1	115673	6	5	88	3.08	17909	14356.5	2729	3.2159	0.372	Red
18979	Q96MR6	WDR65_HUMAN	WD repeat containing protein 65 OS Homo sapiens GN WDR65 PE 1 SV 3	Regular	31.7404	38.12	145931	12	8	118	2.64	30490	4617	12026	1.0342	0.1509	Red
16870	Q96C24	SYTL4_HUMAN	Synaptotagmin like protein 4 OS Homo sapiens GN SYTL4 PE 1 SV 2	Regular	31.6676	38.24	76651	10	5	59	2.98	47356	4108.5	6298	0.9203	0.0705	Red
1383	Q8TE57	ATS16_HUMAN	A disintegrin and metalloproteinase with thrombospondin motifs 16 OS Homo sapiens GN ADAMTS16 PE 1 S	Regular	31.663	38.21	140367	17	8	81	3.19	28418	18925	18964	4.2393	0.5951	Red
839	Q9UPS8	ANR26_HUMAN	Ankyrin repeat domain containing protein 26 OS Homo sapiens GN ANKRD26 PE 1 SV 3	Regular	31.618	38.18	197521	22	19	165	3.92	113916	14464	20334	3.24	0.64	Red
6485	Q5SZK8	FREM2_HUMAN	FRAS1 related extracellular matrix protein 2 OS Homo sapiens GN FREM2 PE 1 SV 2	Regular	31.5398	38.29	352811	23	16	197	2.84	79799	54166	20242	12.1335	4.2808	Red
2811	Q9HCU4	CELR2_HUMAN	Cadherin EGF LAG seven pass G type receptor 2 OS Homo sapiens GN CELSR2 PE 2 SV 1	Regular	31.5379	38.26	322414	28	13	181	2.12	61331	39874	15101	8.932	2.8798	Red
18131	Q9BX84	TRPM6_HUMAN	Transient receptor potential cation channel subfamily M member 6 OS Homo sapiens GN TRPM6 PE 1 SV 2	Regular	31.5077	38.23	233875	14	7	143	1.34	41983	18433	8912	4.1291	0.9657	Red	18132
7740	Q8NDA2	HMCN2_HUMAN	Hemicentin 2 OS Homo sapiens GN HMCN2 PE 2 SV 2	Regular	31.4836	38.25	550079	35	21	319	1.76	92759	31038	34190	6.9527	3.8245	Red
16443	Q96JI7	SPTCS_HUMAN	Spatacsin OS Homo sapiens GN SPG11 PE 1 SV 3	Regular	31.2227	38.46	282860	22	14	182	1.06	52334	21376.5	20530	4.7884	1.3545	Red
7930	Q7Z6Z7	HUWE1_HUMAN	E3 ubiquitin protein ligase HUWE1 OS Homo sapiens GN HUWE1 PE 1 SV 3	Regular	31.1437	38.47	485826	33	28	305	2.67	120886	45523	27256	10.1974	4.9542	Red
4801	P78352	DLG4_HUMAN	Disks large homolog 4 OS Homo sapiens GN DLG4 PE 1 SV 3	Regular	31.0407	38.49	80837.6	6	3	71	2.21	8817	3099	3402	0.6942	0.0561	Red
11002	B2RTY4	MYO9A_HUMAN	Unconventional myosin IXa OS Homo sapiens GN MYO9A PE 1 SV 2	Regular	30.9699	38.65	295101	42	19	235	2.9	147014	10750	28421	2.4081	0.7106	Red
20082	Q17R98	ZN827_HUMAN	Zinc finger protein 827 OS Homo sapiens GN ZNF827 PE 2 SV 1	Regular	30.9607	38.62	120762	16	7	87	2.68	78913	15148.5	15260	3.3933	0.4098	Red
631	Q12802	AKP13_HUMAN	A kinase anchor protein 13 OS Homo sapiens GN AKAP13 PE 1 SV 2	Regular	30.7498	38.68	310573	17	12	272	1.21	38632	15145	14336	3.3926	1.0536	Red
3595	A6NMZ7	CO6A6_HUMAN	Collagen alpha 6 VI chain OS Homo sapiens GN COL6A6 PE 1 SV 2	Regular	30.7439	38.65	248828	27	17	179	4.77	44429	15205	25226	3.406	0.8475	Red
7083	P15586	GNS_HUMAN	N acetylglucosamine 6 sulfatase OS Homo sapiens GN GNS PE 1 SV 3	Regular	30.5328	38.81	62880.6	4	4	32	2.17	13888	19887	2429	4.4548	0.2801	Red
8687	Q8NCU4	K1407_HUMAN	Coiled coil domain containing protein KIAA1407 OS Homo sapiens GN KIAA1407 PE 2 SV 1	Regular	30.5101	38.87	111081	9	7	82	0.53	27512	31575	4244	7.073	0.7857	Red
18623	O75385	ULK1_HUMAN	Serine threonine protein kinase ULK1 OS Homo sapiens GN ULK1 PE 1 SV 2	Regular	30.4683	38.89	113658	6	4	63	1.14	11131	17094	3624	3.8291	0.4352	Red
12544	O15350	P73_HUMAN	Tumor protein p73 OS Homo sapiens GN TP73 PE 1 SV 1	Regular	30.4216	38.95	70250.8	7	4	44	4.09	20411	25825.5	9590	5.785	0.4064	Red
5310	Q14152	EIF3A_HUMAN	Eukaryotic translation initiation factor 3 subunit A OS Homo sapiens GN EIF3A PE 1 SV 1	Regular	30.3958	38.92	166969	11	8	250	0.65	35170	51804	8767	11.6044	1.9376	Red
5497	P58107	EPIPL_HUMAN	Epiplakin OS Homo sapiens GN EPPK1 PE 1 SV 2	Regular	30.357	38.89	558017	43	23	438	2.14	165403	56343.3	43954	12.6212	7.0428	Red	4662 13299
7310	P42262	GRIA2_HUMAN	Glutamate receptor 2 OS Homo sapiens GN GRIA2 PE 1 SV 3	Regular	30.2823	39.05	99448.6	4	4	64	3.4	15039	5749.5	4249	1.2879	0.1281	Red
4806	Q9Y2H0	DLGP4_HUMAN	Disks large associated protein 4 OS Homo sapiens GN DLGAP4 PE 1 SV 3	Regular	30.2272	39.02	108982	11	7	71	1.61	18383	5073	9532	1.1364	0.1238	Red
7713	O00291	HIP1_HUMAN	Huntingtin interacting protein 1 OS Homo sapiens GN HIP1 PE 1 SV 5	Regular	30.19	38.99	117305	16	9	104	4.44	54669	23514	16402	5.2673	0.6179	Red
12655	Q460N5	PAR14_HUMAN	Poly ADP ribose polymerase 14 OS Homo sapiens GN PARP14 PE 1 SV 3	Regular	30.093	39	204853	20	13	168	3.66	61856	9373	14913	2.0996	0.4301	Red
13177	Q9BZ71	PITM3_HUMAN	Membrane associated phosphatidylinositol transfer protein 3 OS Homo sapiens GN PITPNM3 PE 1 SV 2	Regular	30.0461	38.98	107865	7	4	61	5.85	13833	11618	3793	2.6025	0.2807	Red
3336	P35523	CLCN1_HUMAN	Chloride channel protein 1 OS Homo sapiens GN CLCN1 PE 1 SV 3	Regular	29.8215	38.99	109653	7	5	61	2.33	33982	4723.5	14635	1.0581	0.116	Red
12515	O00443	P3C2A_HUMAN	Phosphatidylinositol 4 phosphate 3 kinase C2 domain containing subunit alpha OS Homo sapiens GN PIK3	Regular	29.8073	38.96	192277	21	14	150	2.19	56805	5908	14869	1.3234	0.2545	Red
6993	Q14410	GLPK2_HUMAN	Glycerol kinase 2 OS Homo sapiens GN GK2 PE 2 SV 2	Regular	29.7624	39.02	61449.3	3	3	44	3.62	21563	22012.5	1743	4.9309	0.303	Red
19092	Q702N8	XIRP1_HUMAN	Xin actin binding repeat containing protein 1 OS Homo sapiens GN XIRP1 PE 1 SV 1	Regular	29.4973	39.13	199759	29	15	153	2.12	252457	29662	25845	6.6444	1.3273	Red
19579	Q86UP3	ZFHX4_HUMAN	Zinc finger homeobox protein 4 OS Homo sapiens GN ZFHX4 PE 1 SV 1	Regular	29.3599	39.19	398407	35	17	254	1.99	178483	108232	24634	24.2445	9.6592	Red	19578
10869	P42345	MTOR_HUMAN	Serine threonine protein kinase mTOR OS Homo sapiens GN MTOR PE 1 SV 1	Regular	29.2497	39.21	290945	19	10	204	2.63	33871	17112	11034	3.8332	1.1152	Red
4253	O14529	CUX2_HUMAN	Homeobox protein cut like 2 OS Homo sapiens GN CUX2 PE 1 SV 4	Regular	29.2482	39.18	162190	17	14	115	4.1	49844	5731	14679	1.2838	0.2082	Red
2352	Q8IYE0	CC146_HUMAN	Coiled coil domain containing protein 146 OS Homo sapiens GN CCDC146 PE 2 SV 2	Regular	29.2238	39.15	113206	8	5	124	1.47	43457	32865	7922	7.3619	0.8334	Red
5291	Q9H223	EHD4_HUMAN	EH domain containing protein 4 OS Homo sapiens GN EHD4 PE 1 SV 1	Regular	29.2031	39.12	61403.4	7	6	47	3.51	17743	8752.5	6460	1.9606	0.1204	Red
14566	Q9P227	RHG23_HUMAN	Rho GTPase activating protein 23 OS Homo sapiens GN ARHGAP23 PE 1 SV 2	Regular	29.1927	39.14	163447	16	11	122	0.54	74928	18063	10483	4.0462	0.6613	Red
5123	Q9NYC9	DYH9_HUMAN	Dynein heavy chain 9 axonemal OS Homo sapiens GN DNAH9 PE 1 SV 3	Regular	29.1446	39.11	515927	50	30	367	1.72	335764	21257	45608	4.7617	2.4567	Red	36307 5122 5115 5119
7169	Q6PRD1	GP179_HUMAN	Probable G protein coupled receptor 179 OS Homo sapiens GN GPR179 PE 1 SV 2	Regular	28.9967	39.17	260785	15	9	173	1.44	34414	18176	16575	4.0715	1.0618	Red
5580	Q14674	ESPL1_HUMAN	Separin OS Homo sapiens GN ESPL1 PE 1 SV 3	Regular	28.9926	39.14	236711	16	11	149	2.41	183470	31679	26656	7.0963	1.6798	Red
17938	Q96Q05	TPPC9_HUMAN	Trafficking protein particle complex subunit 9 OS Homo sapiens GN TRAPPC9 PE 1 SV 2	Regular	28.9228	39.11	129899	9	6	77	2.44	19657	5814	3818	1.3024	0.1692	Red
15172	Q92736	RYR2_HUMAN	Ryanodine receptor 2 OS Homo sapiens GN RYR2 PE 1 SV 3	Regular	28.8922	39.13	569701	48	26	397	1.49	176393	22653	43287	5.0744	2.8909	Red	15173 15171
18102	Q7Z2T5	TRM1L_HUMAN	TRMT1 like protein OS Homo sapiens GN TRMT1L PE 1 SV 2	Regular	28.884	39.1	82945.1	8	3	60	1.36	6092	9804	8035	2.1961	0.1822	Red
15937	Q96ST3	SIN3A_HUMAN	Paired amphipathic helix protein Sin3a OS Homo sapiens GN SIN3A PE 1 SV 2	Regular	28.8584	39.07	145974	18	10	107	2.2	32545	5089	11388	1.14	0.1664	Red
3008	O14647	CHD2_HUMAN	Chromodomain helicase DNA binding protein 2 OS Homo sapiens GN CHD2 PE 1 SV 2	Regular	28.8259	39.04	212313	17	7	150	1.86	49997	4287	11997	0.9603	0.2039	Red
4425	Q96NX9	DACH2_HUMAN	Dachshund homolog 2 OS Homo sapiens GN DACH2 PE 2 SV 1	Regular	28.772	39.01	65665.2	4	4	42	3.17	23236	3430.5	3682	0.7685	0.0505	Red
215	Q99758	ABCA3_HUMAN	ATP binding cassette sub family A member 3 OS Homo sapiens GN ABCA3 PE 1 SV 2	Regular	28.6886	39.12	192959	21	10	123	1.76	34684	10419	14583	2.3339	0.4503	Red
17811	Q9UKE5	TNIK_HUMAN	TRAF2 and NCK interacting protein kinase OS Homo sapiens GN TNIK PE 1 SV 1	Regular	28.588	39.22	155457	11	8	112	1.54	34531	13116.8	8048	2.9382	0.4568	Red	10498
520	Q8N4X5	AF1L2_HUMAN	Actin filament associated protein 1 like 2 OS Homo sapiens GN AFAP1L2 PE 1 SV 1	Regular	28.4926	39.28	92212.2	5	4	63	1.71	12605	9816	4624	2.1988	0.2028	Red
5807	Q9ULE4	F184B_HUMAN	Protein FAM184B OS Homo sapiens GN FAM184B PE 2 SV 3	Regular	28.4584	39.3	121956	9	6	111	2.08	26021	31386	6052	7.0306	0.8574	Red
9831	Q07954	LRP1_HUMAN	Prolow density lipoprotein receptor related protein 1 OS Homo sapiens GN LRP1 PE 1 SV 2	Regular	28.3268	39.4	523483	25	17	301	2.55	95752	28642	18858	6.416	3.3586	Red
5404	Q8N8S7	ENAH_HUMAN	Protein enabled homolog OS Homo sapiens GN ENAH PE 1 SV 2	Regular	28.1918	39.5	66624.4	7	3	39	2.88	21429	12127.5	5105	2.7166	0.181	Red
5298	Q9UI10	EI2BD_HUMAN	Translation initiation factor eIF 2B subunit delta OS Homo sapiens GN EIF2B4 PE 1 SV 2	Regular	28.1171	39.6	58070.6	6	4	42	1.72	17216	7314	5786	1.6384	0.0951	Red
5501	O95208	EPN2_HUMAN	Epsin 2 OS Homo sapiens GN EPN2 PE 1 SV 3	Regular	28.0844	39.62	68709.8	6	4	47	3.28	12072	7737	5306	1.7331	0.1191	Red
11132	Q8IVL1	NAV2_HUMAN	Neuron navigator 2 OS Homo sapiens GN NAV2 PE 1 SV 3	Regular	27.8724	39.84	269479	27	16	173	2.37	56989	5825	24395	1.3048	0.3516	Red
15540	Q9BY12	SCAPE_HUMAN	S phase cyclin A associated protein in the endoplasmic reticulum OS Homo sapiens GN SCAPER PE 1 SV 1	Regular	27.822	39.86	159810	15	10	116	1.29	58826	28806	19968	6.4527	1.0312	Red
1734	P51587	BRCA2_HUMAN	Breast cancer type 2 susceptibility protein OS Homo sapiens GN BRCA2 PE 1 SV 2	Regular	27.7988	39.83	388560	34	21	290	2.72	77537	26147	28782	5.8571	2.2758	Red
1209	Q9NR48	ASH1L_HUMAN	Histone lysine N methyltransferase ASH1L OS Homo sapiens GN ASH1L PE 1 SV 2	Regular	27.7417	39.89	336383	18	11	241	0.84	43371	4656	15668	1.043	0.3508	Red
7616	Q9ULT8	HECD1_HUMAN	E3 ubiquitin protein ligase HECTD1 OS Homo sapiens GN HECTD1 PE 1 SV 3	Regular	27.723	39.86	292407	28	13	210	2.61	105608	9250	23688	2.072	0.6059	Red
10303	P08183	MDR1_HUMAN	Multidrug resistance protein 1 OS Homo sapiens GN ABCB1 PE 1 SV 3	Regular	27.7161	39.83	141878	9	6	89	2.58	21758	10980.5	7101	2.4597	0.349	Red	10304
10937	O75592	MYCB2_HUMAN	Probable E3 ubiquitin protein ligase MYCBP2 OS Homo sapiens GN MYCBP2 PE 1 SV 3	Regular	27.6329	39.89	518183	28	19	330	2.05	161935	11379	31178	2.549	1.3208	Red
5030	Q8IZU8	DSEL_HUMAN	Dermatan sulfate epimerase like protein OS Homo sapiens GN DSEL PE 2 SV 2	Regular	27.5522	39.99	139865	10	5	69	0.66	14871	7644	6546	1.7123	0.2395	Red
12857	Q14432	PDE3A_HUMAN	cGMP inhibited 3 5 cyclic phosphodiesterase A OS Homo sapiens GN PDE3A PE 1 SV 3	Regular	27.5027	40.04	126519	5	3	78	4.65	9567	9567	5500	2.1431	0.2711	Red
3577	P02461	CO3A1_HUMAN	Collagen alpha 1 III chain OS Homo sapiens GN COL3A1 PE 1 SV 4	Regular	27.4619	40.1	139819	17	9	83	1.77	46379	8526	14240	1.9099	0.267	Red	3573
8993	O75037	KI21B_HUMAN	Kinesin like protein KIF21B OS Homo sapiens GN KIF21B PE 1 SV 2	Regular	27.3134	40.24	184430	10	10	134	0.61	43390	19890	11180	4.4555	0.8217	Red	13299
19025	Q9P202	WHRN_HUMAN	Whirlin OS Homo sapiens GN WHRN PE 1 SV 3	Regular	27.3051	40.21	96814	6	3	66	1.65	22612	27714	4078	6.2081	0.601	Red
4898	Q96BY6	DOC10_HUMAN	Dedicator of cytokinesis protein 10 OS Homo sapiens GN DOCK10 PE 1 SV 3	Regular	27.293	40.18	251984	23	15	167	1.6	95720	13422	14746	3.0066	0.7576	Red
225	Q86UQ4	ABCAD_HUMAN	ATP binding cassette sub family A member 13 OS Homo sapiens GN ABCA13 PE 2 SV 3	Regular	27.2407	40.15	580894	37	23	352	2.49	244790	107823	43818	24.1529	14.0303	Red
1359	P35670	ATP7B_HUMAN	Copper transporting ATPase 2 OS Homo sapiens GN ATP7B PE 1 SV 4	Regular	27.1647	40.17	158917	11	5	80	2.39	38765	13061	7270	2.9257	0.4649	Red
6644	O75899	GABR2_HUMAN	Gamma aminobutyric acid type B receptor subunit 2 OS Homo sapiens GN GABBR2 PE 1 SV 1	Regular	27.1324	40.22	106848	4	4	61	2.55	17188	11385	6680	2.5503	0.2725	Red
17507	Q9Y4G6	TLN2_HUMAN	Talin 2 OS Homo sapiens GN TLN2 PE 1 SV 4	Regular	26.911	40.23	273952	28	15	201	1.14	67212	15426	25776	3.4555	0.9466	Red	17506
8801	Q8WYB5	KAT6B_HUMAN	Histone acetyltransferase KAT6B OS Homo sapiens GN KAT6B PE 1 SV 3	Regular	26.9013	40.21	234287	16	9	139	3.14	110131	95901	59376	21.4823	5.033	Red
11589	O60287	NPA1P_HUMAN	Nucleolar pre ribosomal associated protein 1 OS Homo sapiens GN URB1 PE 1 SV 4	Regular	26.8507	40.18	256671	25	14	175	2.11	141849	10842	17067	2.4287	0.6234	Red
424	Q9UKJ8	ADA21_HUMAN	Disintegrin and metalloproteinase domain containing protein 21 OS Homo sapiens GN ADAM21 PE 2 SV 2	Regular	26.8229	40.15	83457	6	3	50	1.39	11134	9780	4094	2.1908	0.1828	Red
1377	Q13535	ATR_HUMAN	Serine threonine protein kinase ATR OS Homo sapiens GN ATR PE 1 SV 3	Regular	26.82	40.12	304960	12	10	206	0.57	53092	10782	9792	2.4152	0.7365	Red
15173	Q15413	RYR3_HUMAN	Ryanodine receptor 3 OS Homo sapiens GN RYR3 PE 1 SV 3	Regular	26.7534	40.18	558145	47	23	363	0.72	169600	21868	51087	4.8985	2.7341	Red	9454 15172 15171
8138	O43432	IF4G3_HUMAN	Eukaryotic translation initiation factor 4 gamma 3 OS Homo sapiens GN EIF4G3 PE 1 SV 2	Regular	26.7296	40.19	177793	15	11	142	1.39	97362	43901	19841	9.8341	1.7484	Red
1832	Q86VB7	C163A_HUMAN	Scavenger receptor cysteine rich type 1 protein M130 OS Homo sapiens GN CD163 PE 1 SV 2	Regular	26.624	40.25	129671	11	7	72	3.72	18972	8544	7338	1.9139	0.2482	Red
16511	Q9UQ35	SRRM2_HUMAN	Serine arginine repetitive matrix protein 2 OS Homo sapiens GN SRRM2 PE 1 SV 2	Regular	26.5644	40.26	300357	21	8	189	1.71	68572	18829	16030	4.2178	1.2668	Red
16625	Q9P2P6	STAR9_HUMAN	StAR related lipid transfer protein 9 OS Homo sapiens GN STARD9 PE 1 SV 3	Regular	26.4239	40.44	522161	24	16	377	1.6	83666	31572	24451	7.0723	3.6929	Red
9749	P50851	LRBA_HUMAN	Lipopolysaccharide responsive and beige like anchor protein OS Homo sapiens GN LRBA PE 1 SV 4	Regular	26.419	40.41	321789	16	11	205	1.78	52326	23002	10171	5.1526	1.658	Red	11140
12434	Q7RTW8	OTOAN_HUMAN	Otoancorin OS Homo sapiens GN OTOA PE 1 SV 1	Regular	26.393	40.38	129616	12	5	87	1.82	39703	34999.5	6872	7.8401	1.0162	Red
19829	Q96JM2	ZN462_HUMAN	Zinc finger protein 462 OS Homo sapiens GN ZNF462 PE 1 SV 3	Regular	26.2711	40.39	289650	30	16	189	1.8	159443	12422	28212	2.7826	0.806	Red
2765	Q6ZU80	CE128_HUMAN	Centrosomal protein of 128 kDa OS Homo sapiens GN CEP128 PE 1 SV 2	Regular	26.1489	40.41	128643	13	6	123	3.2	42973	25093	8492	5.621	0.7231	Red
19452	A8MT70	ZBBX_HUMAN	Zinc finger B box domain containing protein 1 OS Homo sapiens GN ZBBX PE 2 SV 3	Regular	26.1271	40.38	92509.7	15	8	78	3.75	28635	9815	8472	2.1986	0.2034	Red
18822	Q96RL7	VP13A_HUMAN	Vacuolar protein sorting associated protein 13A OS Homo sapiens GN VPS13A PE 1 SV 2	Regular	26.0607	40.39	362102	20	12	226	1.51	51311	9105	17201	2.0396	0.7385	Red
2580	Q5M9N0	CD158_HUMAN	Coiled coil domain containing protein 158 OS Homo sapiens GN CCDC158 PE 2 SV 2	Regular	25.9731	40.41	127654	4	5	116	2.61	34178	31492	5781	7.0544	0.9005	Red
12517	O75747	P3C2G_HUMAN	Phosphatidylinositol 4 phosphate 3 kinase C2 domain containing subunit gamma OS Homo sapiens GN PIK3	Regular	25.89	40.42	167540	19	8	106	2.08	71044	6545	13470	1.4661	0.2456	Red
692	Q86TB3	ALPK2_HUMAN	Alpha protein kinase 2 OS Homo sapiens GN ALPK2 PE 1 SV 3	Regular	25.7594	40.43	240035	16	10	171	4.61	21628	8950	7997	2.0048	0.4812	Red
1245	Q76L83	ASXL2_HUMAN	Putative Polycomb group protein ASXL2 OS Homo sapiens GN ASXL2 PE 1 SV 1	Regular	25.718	40.44	155132	8	5	114	0.7	12547	4947	6450	1.1082	0.1719	Red
16731	P14410	SUIS_HUMAN	Sucrase isomaltase intestinal OS Homo sapiens GN SI PE 1 SV 6	Regular	25.658	40.46	210879	11	7	117	0.99	8914	2469	7874	0.5531	0.1166	Red
8459	P46940	IQGA1_HUMAN	Ras GTPase activating like protein IQGAP1 OS Homo sapiens GN IQGAP1 PE 1 SV 1	Regular	25.5211	40.59	189880	8	10	116	2.9	37777	13550	6554	3.0353	0.5763	Red
16229	Q92673	SORL_HUMAN	Sortilin related receptor OS Homo sapiens GN SORL1 PE 1 SV 2	Regular	25.4704	40.56	253958	6	6	164	2.03	21899	10596	6431	2.3736	0.6028	Red
1376	P46100	ATRX_HUMAN	Transcriptional regulator ATRX OS Homo sapiens GN ATRX PE 1 SV 5	Regular	25.3639	40.61	285038	20	12	217	2.41	59361	17265	17978	3.8675	1.1024	Red
1174	Q9ULH1	ASAP1_HUMAN	Arf GAP with SH3 domain ANK repeat and PH domain containing protein 1 OS Homo sapiens GN ASAP1 PE 1	Regular	25.2482	40.67	126468	11	7	80	0.97	134038	3696	13022	0.8279	0.1047	Red
1197	Q8N3C0	ASCC3_HUMAN	Activating signal cointegrator 1 complex subunit 3 OS Homo sapiens GN ASCC3 PE 1 SV 3	Regular	25.1088	40.68	253058	18	13	171	1.59	69971	20736	18918	4.645	1.1754	Red
6361	O75369	FLNB_HUMAN	Filamin B OS Homo sapiens GN FLNB PE 1 SV 2	Regular	24.9719	40.73	280331	32	18	186	1.08	80992	4152	19801	0.9301	0.2607	Red	6360
6291	P22607	FGFR3_HUMAN	Fibroblast growth factor receptor 3 OS Homo sapiens GN FGFR3 PE 1 SV 1	Regular	24.9464	40.7	88679.2	4	4	50	2.23	12643	9429	7992	2.1121	0.1873	Red
14477	Q8NET4	RGAG1_HUMAN	Retrotransposon gag domain containing protein 1 OS Homo sapiens GN RGAG1 PE 1 SV 1	Regular	24.9186	40.68	144965	14	8	67	2.59	31456	5554.5	10340	1.2442	0.1804	Red
11575	Q96PH1	NOX5_HUMAN	NADPH oxidase 5 OS Homo sapiens GN NOX5 PE 1 SV 1	Regular	24.9082	40.69	87408.5	8	5	52	3.66	49612	41925	7618	9.3914	0.8209	Red
6122	Q6V0I7	FAT4_HUMAN	Protocadherin Fat 4 OS Homo sapiens GN FAT4 PE 1 SV 2	Regular	24.8653	40.7	546622	39	24	299	1.41	140639	8672	41393	1.9426	1.0619	Red	12776 12774
16033	Q8IY92	SLX4_HUMAN	Structure specific endonuclease subunit SLX4 OS Homo sapiens GN SLX4 PE 1 SV 3	Regular	24.8176	40.67	201837	9	6	126	0.71	69270	81453	9291	18.2459	3.6827	Red
1107	P04424	ARLY_HUMAN	Argininosuccinate lyase OS Homo sapiens GN ASL PE 1 SV 4	Regular	24.7685	40.69	51943.2	1	2	37	4.09	5363	8044.5	1705	1.802	0.0936	Red
19578	Q15911	ZFHX3_HUMAN	Zinc finger homeobox protein 3 OS Homo sapiens GN ZFHX3 PE 1 SV 2	Regular	24.6762	40.7	409096	37	25	242	1.08	127491	7224	33413	1.6182	0.662	Red	19579
10984	Q9Y6X6	MYO16_HUMAN	Unconventional myosin XVI OS Homo sapiens GN MYO16 PE 1 SV 3	Regular	24.6717	40.67	208296	5	9	128	1.08	55034	26656.5	6885	5.9712	1.2438	Red
11379	P19838	NFKB1_HUMAN	Nuclear factor NF kappa B p105 subunit OS Homo sapiens GN NFKB1 PE 1 SV 2	Regular	24.6445	40.65	105983	4	4	72	2.38	13567	6813	2267	1.5261	0.1617	Red
18142	Q9Y4A5	TRRAP_HUMAN	Transformation transcription domain associated protein OS Homo sapiens GN TRRAP PE 1 SV 3	Regular	24.6097	40.66	442049	38	21	318	1.81	204589	12381	46704	2.7734	1.226	Red
4952	P28340	DPOD1_HUMAN	DNA polymerase delta catalytic subunit OS Homo sapiens GN POLD1 PE 1 SV 2	Regular	24.5666	40.67	125114	10	8	104	2.44	48110	18920	7555	4.2382	0.5303	Red
10993	Q8N1T3	MYO1H_HUMAN	Unconventional myosin Ih OS Homo sapiens GN MYO1H PE 2 SV 2	Regular	24.5367	40.64	120120	12	7	80	1.84	44199	11535	9054	2.5839	0.3104	Red
11359	Q14494	NF2L1_HUMAN	Nuclear factor erythroid 2 related factor 1 OS Homo sapiens GN NFE2L1 PE 1 SV 1	Regular	24.5127	40.62	85046.1	6	3	44	4.4	40110	22674	6248	5.0791	0.432	Red
786	P16157	ANK1_HUMAN	Ankyrin 1 OS Homo sapiens GN ANK1 PE 1 SV 3	Regular	24.4936	40.59	207463	14	8	142	2.82	23959	4783	10678	1.0714	0.2223	Red
3104	Q5JU67	CI117_HUMAN	Uncharacterized protein C9orf117 OS Homo sapiens GN C9orf117 PE 2 SV 1	Regular	24.4762	40.56	60704.6	4	4	66	1.35	15436	25713	4427	5.7598	0.3496	Red
11144	O60934	NBN_HUMAN	Nibrin OS Homo sapiens GN NBN PE 1 SV 1	Regular	24.4106	40.54	85643.5	11	7	66	2.79	52339	9183	12102	2.057	0.1762	Red
13269	Q9NQ66	PLCB1_HUMAN	1 phosphatidylinositol 4 5 bisphosphate phosphodiesterase beta 1 OS Homo sapiens GN PLCB1 PE 1 SV 1	Regular	24.4018	40.51	139423	11	8	95	2.71	75556	32376	12836	7.2524	1.0111	Red
12774	Q9Y5G4	PCDG9_HUMAN	Protocadherin gamma A9 OS Homo sapiens GN PCDHGA9 PE 2 SV 1	Regular	24.3307	40.56	102257	8	5	53	2.04	26451	4887	3317	1.0947	0.1119	Red	6122 12776
18961	Q5JSH3	WDR44_HUMAN	WD repeat containing protein 44 OS Homo sapiens GN WDR44 PE 1 SV 1	Regular	24.2964	40.57	101937	5	6	75	0.99	25646	14496	4493	3.2472	0.331	Red
20135	Q02386	ZNF45_HUMAN	Zinc finger protein 45 OS Homo sapiens GN ZNF45 PE 2 SV 2	Regular	24.2693	40.55	80523	5	3	62	1.91	3651	4983	12167	1.1162	0.0899	Red
10024	Q99683	M3K5_HUMAN	Mitogen activated protein kinase kinase kinase 5 OS Homo sapiens GN MAP3K5 PE 1 SV 1	Regular	24.2168	40.52	155849	20	11	112	2.62	60162	18714	18100	4.192	0.6533	Red	16261
15570	P35499	SCN4A_HUMAN	Sodium channel protein type 4 subunit alpha OS Homo sapiens GN SCN4A PE 1 SV 4	Regular	24.1721	40.49	210286	15	8	102	2.45	45204	11280	25932	2.5268	0.5313	Red
11089	Q86W24	NAL14_HUMAN	NACHT LRR and PYD domains containing protein 14 OS Homo sapiens GN NLRP14 PE 2 SV 1	Regular	24.1154	40.47	127699	11	6	83	2.1	35666	30775.5	5198	6.8939	0.8803	Red
1992	Q9Y6J0	CABIN_HUMAN	Calcineurin binding protein cabin 1 OS Homo sapiens GN CABIN1 PE 1 SV 1	Regular	24.1071	40.44	248862	20	10	160	2.03	77751	36102	18545	8.087	2.0126	Red
16899	Q6IEE7	T132E_HUMAN	Transmembrane protein 132E OS Homo sapiens GN TMEM132E PE 2 SV 1	Regular	24.0572	40.42	107665	8	3	66	1.02	22349	10119	4859	2.2667	0.244	Red
6120	Q9NYQ8	FAT2_HUMAN	Protocadherin Fat 2 OS Homo sapiens GN FAT2 PE 1 SV 2	Regular	24.0472	40.39	482397	22	13	276	1.22	67260	17738	22132	3.9734	1.9168	Red
3160	Q86WR7	CJ047_HUMAN	Uncharacterized protein C10orf47 OS Homo sapiens GN C10orf47 PE 1 SV 2	Regular	23.9515	40.48	46144.2	7	3	30	4.14	8448	9910.5	5341	2.22	0.1024	Red
10500	Q96T58	MINT_HUMAN	Msx2 interacting protein OS Homo sapiens GN SPEN PE 1 SV 1	Regular	23.9187	40.49	403275	22	17	286	1.58	75216	17555	16825	3.9324	1.5858	Red
8020	Q4G0P3	HYDIN_HUMAN	Hydrocephalus inducing protein homolog OS Homo sapiens GN HYDIN PE 1 SV 3	Regular	23.8054	40.58	581311	42	23	346	0.68	149181	10633	33438	2.3818	1.3846	Red
2767	Q9UPV0	CE164_HUMAN	Centrosomal protein of 164 kDa OS Homo sapiens GN CEP164 PE 1 SV 3	Regular	23.7322	40.67	164827	13	9	146	3.29	43520	27647	9093	6.1931	1.0208	Red
16059	Q96SB8	SMC6_HUMAN	Structural maintenance of chromosomes protein 6 OS Homo sapiens GN SMC6 PE 1 SV 2	Regular	23.7282	40.64	127295	17	10	104	3.02	41229	12749	8525	2.8558	0.3635	Red
18260	Q96AY4	TTC28_HUMAN	Tetratricopeptide repeat protein 28 OS Homo sapiens GN TTC28 PE 1 SV 4	Regular	23.635	40.73	272824	35	23	169	2.02	93821	12238	22544	2.7414	0.7479	Red	18801
9683	Q8IWU2	LMTK2_HUMAN	Serine threonine protein kinase LMTK2 OS Homo sapiens GN LMTK2 PE 1 SV 2	Regular	23.5866	40.74	166098	6	4	95	1.26	8379	5361	2671	1.2009	0.1995	Red
1380	Q76LX8	ATS13_HUMAN	A disintegrin and metalloproteinase with thrombospondin motifs 13 OS Homo sapiens GN ADAMTS13 PE 1 S	Regular	23.4705	40.79	158281	11	7	90	0.49	52697	2574	15747	0.5766	0.0913	Red
16274	Q8IW75	SPA12_HUMAN	Serpin A12 OS Homo sapiens GN SERPINA12 PE 2 SV 1	Regular	23.4412	40.8	47289.2	4	3	32	3.86	17159	24570	4830	5.5038	0.2603	Red
15875	Q8TF72	SHRM3_HUMAN	Protein Shroom3 OS Homo sapiens GN SHROOM3 PE 1 SV 2	Regular	23.32	40.93	218454	22	15	174	3.36	95810	26011	18581	5.8266	1.2728	Red
11464	P30414	NKTR_HUMAN	NK tumor recognition protein OS Homo sapiens GN NKTR PE 1 SV 2	Regular	23.2971	40.94	166703	12	7	102	2.46	34084	3405	8106	0.7627	0.1272	Red
8783	Q6NY19	KANK3_HUMAN	KN motif and ankyrin repeat domain containing protein 3 OS Homo sapiens GN KANK3 PE 2 SV 1	Regular	23.2941	40.91	89052.8	7	4	60	2.62	25424	6321	6316	1.4159	0.1261	Red
17017	O00268	TAF4_HUMAN	Transcription initiation factor TFIID subunit 4 OS Homo sapiens GN TAF4 PE 1 SV 2	Regular	23.2685	40.89	110400	6	4	62	2.21	39093	17536.5	4182	3.9283	0.4337	Red
13566	Q5T8A7	PPR26_HUMAN	Protein phosphatase 1 regulatory subunit 26 OS Homo sapiens GN PPP1R26 PE 1 SV 1	Regular	23.1626	40.94	128435	6	5	106	0.58	26291	3021	4337	0.6767	0.0869	Red
10644	Q86VD1	MORC1_HUMAN	MORC family CW type zinc finger protein 1 OS Homo sapiens GN MORC1 PE 2 SV 2	Regular	23.1498	40.91	114250	2	5	80	1.12	169737	9867	16289	2.2103	0.2525	Red	19647 1590 14135 24992 18790
5902	Q5VVP1	F75A6_HUMAN	Protein FAM75A6 OS Homo sapiens GN FAM75A6 PE 1 SV 1	Regular	23.1406	40.92	149529	13	9	94	3.05	66614	14832	10562	3.3224	0.4968	Red
19754	Q5VUA4	ZN318_HUMAN	Zinc finger protein 318 OS Homo sapiens GN ZNF318 PE 1 SV 2	Regular	23.0623	40.97	252766	21	12	182	1.89	54411	16024	16662	3.5895	0.9073	Red
11139	A2RRP1	NBAS_HUMAN	Neuroblastoma amplified sequence OS Homo sapiens GN NBAS PE 1 SV 2	Regular	23.0326	40.98	271879	26	15	158	1.31	97040	16119	15882	3.6107	0.9817	Red	23573 12465 2372
5616	P57679	EVC_HUMAN	Ellis van Creveld syndrome protein OS Homo sapiens GN EVC PE 1 SV 1	Regular	22.9545	41.03	112960	5	8	80	5.95	22514	5707	13405	1.2784	0.1444	Red
1242	O75129	ASTN2_HUMAN	Astrotactin 2 OS Homo sapiens GN ASTN2 PE 2 SV 2	Regular	22.9319	41.01	150696	9	4	96	2.91	33896	10953	10014	2.4535	0.3697	Red
8559	P26010	ITB7_HUMAN	Integrin beta 7 OS Homo sapiens GN ITGB7 PE 1 SV 1	Regular	22.7898	41.05	90039.8	5	3	51	2.38	11038	14314.5	3965	3.2065	0.2887	Red
5043	Q6ZMT9	DTHD1_HUMAN	Death domain containing protein 1 OS Homo sapiens GN DTHD1 PE 2 SV 3	Regular	22.6993	41.14	89241.4	5	3	73	1.92	6667	4944	2174	1.1075	0.0988	Red
6086	Q53R41	FAKD1_HUMAN	FAST kinase domain containing protein 1 OS Homo sapiens GN FASTKD1 PE 1 SV 1	Regular	22.5633	41.22	98437.4	5	4	57	1.18	15161	5067	4459	1.135	0.1117	Red
3300	O75122	CLAP2_HUMAN	CLIP associating protein 2 OS Homo sapiens GN CLASP2 PE 1 SV 2	Regular	22.4893	41.2	141931	14	10	112	0.54	126134	8736	13217	1.9569	0.2777	Red
11430	Q9Y2I6	NINL_HUMAN	Ninein like protein OS Homo sapiens GN NINL PE 1 SV 2	Regular	22.4876	41.17	157541	12	8	129	1.45	21548	3817.5	7630	0.8551	0.1347	Red
10187	O15021	MAST4_HUMAN	Microtubule associated serine threonine protein kinase 4 OS Homo sapiens GN MAST4 PE 1 SV 3	Regular	22.4625	41.15	286602	16	10	202	2.09	28140	11023	12565	2.4692	0.7077	Red	10185
3400	O15516	CLOCK_HUMAN	Circadian locomoter output cycles protein kaput OS Homo sapiens GN CLOCK PE 1 SV 1	Regular	22.3103	41.27	95817.2	7	4	46	3.19	24440	24150	12599	5.4097	0.5183	Red
5794	Q8IX21	F178A_HUMAN	Protein FAM178A OS Homo sapiens GN FAM178A PE 1 SV 2	Regular	22.1367	41.35	132786	18	11	91	1.96	44507	7740	17765	1.7338	0.2302	Red
10557	Q03164	MLL1_HUMAN	Histone lysine N methyltransferase MLL OS Homo sapiens GN MLL PE 1 SV 5	Regular	22.1298	41.33	436327	29	22	260	1.44	226057	4930	38244	1.1043	0.4819	Red	15468 25350 36832 33533
10980	Q15746	MYLK_HUMAN	Myosin light chain kinase smooth muscle OS Homo sapiens GN MYLK PE 1 SV 4	Regular	21.8773	41.45	213453	23	12	138	2.04	45990	19085	15393	4.2751	0.9125	Red
17263	Q6N022	TEN4_HUMAN	Teneurin 4 OS Homo sapiens GN ODZ4 PE 2 SV 2	Regular	21.7067	41.49	312576	18	8	164	0.76	98513	30258	15658	6.778	2.1186	Red
13346	Q9UIW2	PLXA1_HUMAN	Plexin A1 OS Homo sapiens GN PLXNA1 PE 1 SV 3	Regular	21.6862	41.47	214261	13	8	126	1.58	85893	4792.18	13861	1.0735	0.23	Red	13349 13348 13347
10996	Q9Y4I1	MYO5A_HUMAN	Unconventional myosin Va OS Homo sapiens GN MYO5A PE 1 SV 2	Regular	21.6299	41.48	217116	11	5	161	0.7	31525	31242	14075	6.9984	1.5195	Red
1728	Q12830	BPTF_HUMAN	Nucleosome remodeling factor subunit BPTF OS Homo sapiens GN BPTF PE 1 SV 3	Regular	21.5736	41.45	341000	29	16	225	1.44	98487	4952	26600	1.1093	0.3783	Red
788	Q12955	ANK3_HUMAN	Ankyrin 3 OS Homo sapiens GN ANK3 PE 1 SV 3	Regular	21.5362	41.5	482692	31	24	361	1.46	85254	14269	24046	3.1963	1.5428	Red
6119	Q14517	FAT1_HUMAN	Protocadherin Fat 1 OS Homo sapiens GN FAT1 PE 1 SV 2	Regular	21.5111	41.47	509695	23	16	292	1.31	54310	9606	12643	2.1518	1.0968	Red
1072	O14497	ARI1A_HUMAN	AT rich interactive domain containing protein 1A OS Homo sapiens GN ARID1A PE 1 SV 3	Regular	21.4875	41.45	242958	10	9	117	3.28	41959	13340	15706	2.9882	0.726	Red
18990	Q5VTH9	WDR78_HUMAN	WD repeat containing protein 78 OS Homo sapiens GN WDR78 PE 2 SV 1	Regular	21.4661	41.42	95314.1	4	2	66	1.18	25981	22797	1382	5.1066	0.4867	Red
5968	Q5VSL9	FA40A_HUMAN	Protein FAM40A OS Homo sapiens GN FAM40A PE 1 SV 1	Regular	21.4403	41.4	96317.4	16	7	58	1.19	26859	12966	7320	2.9045	0.2797	Red
8674	Q2LD37	K1109_HUMAN	Uncharacterized protein KIAA1109 OS Homo sapiens GN KIAA1109 PE 1 SV 2	Regular	21.3677	41.41	559703	40	23	336	0.46	96665	7650	35598	1.7136	0.9591	Red
6894	A6NEM1	GG6L9_HUMAN	Golgin subfamily A member 6 like protein 9 OS Homo sapiens GN GOLGA6L9 PE 2 SV 3	Regular	21.3548	41.38	49380.9	5	3	30	4.86	57477	23976	4000	5.3708	0.2652	Red
1632	Q8TD16	BICD2_HUMAN	Protein bicaudal D homolog 2 OS Homo sapiens GN BICD2 PE 1 SV 1	Regular	21.2999	41.39	93761.4	8	6	84	1.21	43087	0	9413			Red	1631
17876	Q92547	TOPB1_HUMAN	DNA topoisomerase 2 binding protein 1 OS Homo sapiens GN TOPBP1 PE 1 SV 3	Regular	21.2158	41.4	172789	16	10	121	1.84	63527	10135	12442	2.2703	0.3923	Red
1318	Q2TAZ0	ATG2A_HUMAN	Autophagy related protein 2 homolog A OS Homo sapiens GN ATG2A PE 1 SV 3	Regular	21.1662	41.38	215027	15	9	127	0.88	267121	6731.76	14832	1.508	0.3243	Red	1319
8955	Q7LBC6	KDM3B_HUMAN	Lysine specific demethylase 3B OS Homo sapiens GN KDM3B PE 1 SV 2	Regular	21.0708	41.42	193292	13	7	132	1.53	167879	5955	17797	1.334	0.2578	Red
6169	Q6PIJ6	FBX38_HUMAN	F box only protein 38 OS Homo sapiens GN FBXO38 PE 1 SV 3	Regular	21.0554	41.4	135826	5	4	80	2.44	15218	6325.5	3781	1.4169	0.1925	Red
5469	Q96L91	EP400_HUMAN	E1A binding protein p400 OS Homo sapiens GN EP400 PE 1 SV 4	Regular	20.8512	41.44	344915	13	9	176	0.82	56722	16681.5	24485	3.7367	1.2889	Red
19876	O15090	ZN536_HUMAN	Zinc finger protein 536 OS Homo sapiens GN ZNF536 PE 1 SV 3	Regular	20.7742	41.42	143185	13	6	97	1.46	74053	68518.5	9598	15.3485	2.1977	Red
9147	P03952	KLKB1_HUMAN	Plasma kallikrein OS Homo sapiens GN KLKB1 PE 1 SV 1	Regular	20.5532	41.54	73479.8	10	7	54	1.41	34522	2331	5778	0.5222	0.0384	Red
16066	Q8TEV9	SMCR8_HUMAN	Smith Magenis syndrome chromosomal region candidate gene 8 protein OS Homo sapiens GN SMCR8 PE 1 SV	Regular	20.5428	41.55	105935	6	4	63	1.39	11485	3555	4647	0.7963	0.0844	Red
10559	Q8NEZ4	MLL3_HUMAN	Histone lysine N methyltransferase MLL3 OS Homo sapiens GN MLL3 PE 1 SV 3	Regular	20.5359	41.52	548613	21	13	320	0.61	52876	16596	18241	3.7176	2.0395	Red
15836	Q96B97	SH3K1_HUMAN	SH3 domain containing kinase binding protein 1 OS Homo sapiens GN SH3KBP1 PE 1 SV 2	Regular	20.4388	41.64	73297.5	7	6	66	1.65	57340	110436	12380	24.7383	1.8133	Red
2345	Q8IY82	CC135_HUMAN	Coiled coil domain containing protein lobo homolog OS Homo sapiens GN CCDC135 PE 2 SV 3	Regular	20.4308	41.61	104581	8	5	78	2.86	19836	12957	4426	2.9024	0.3035	Red	1268
17794	O15417	TNC18_HUMAN	Trinucleotide repeat containing gene 18 protein OS Homo sapiens GN TNRC18 PE 1 SV 3	Regular	20.1974	41.69	316173	28	16	200	1.28	155439	10915	23076	2.445	0.773	Red
4968	O60673	DPOLZ_HUMAN	DNA polymerase zeta catalytic subunit OS Homo sapiens GN REV3L PE 1 SV 2	Regular	20.0555	41.74	356198	20	13	222	1.6	49331	12951	14870	2.9011	1.0334	Red
19067	Q9P2S5	WRP73_HUMAN	WD repeat containing protein WRAP73 OS Homo sapiens GN WRAP73 PE 2 SV 1	Regular	19.952	41.71	52672.1	3	3	36	5	3981	3391.5	2780	0.7597	0.04	Red
7404	Q9UHL9	GT2D1_HUMAN	General transcription factor II I repeat domain containing protein 1 OS Homo sapiens GN GTF2IRD1 PE	Regular	19.9294	41.69	106970	10	6	91	3.02	21130	7551	7228	1.6915	0.1809	Red
18992	Q562E7	WDR81_HUMAN	WD repeat containing protein 81 OS Homo sapiens GN WDR81 PE 1 SV 2	Regular	19.8208	41.7	213522	14	8	121	2.11	25753	8535	17918	1.9119	0.4082	Red
16017	O75094	SLIT3_HUMAN	Slit homolog 3 protein OS Homo sapiens GN SLIT3 PE 2 SV 3	Regular	19.7486	41.71	173758	17	9	100	1.97	33390	15952.5	16253	3.5734	0.6209	Red
2768	Q5SW79	CE170_HUMAN	Centrosomal protein of 170 kDa OS Homo sapiens GN CEP170 PE 1 SV 1	Regular	19.7429	41.68	175692	26	9	142	0.95	55144	39249	11926	8.792	1.5447	Red	39170
14572	Q52LW3	RHG29_HUMAN	Rho GTPase activating protein 29 OS Homo sapiens GN ARHGAP29 PE 1 SV 2	Regular	19.691	41.66	143604	14	11	107	1.03	79869	95922	23549	21.487	3.0856	Red
18676	O75445	USH2A_HUMAN	Usherin OS Homo sapiens GN USH2A PE 1 SV 3	Regular	19.6458	41.63	586664	37	21	290	2.33	102195	11042	24493	2.4735	1.4511	Red
9408	Q16787	LAMA3_HUMAN	Laminin subunit alpha 3 OS Homo sapiens GN LAMA3 PE 1 SV 2	Regular	19.6231	41.61	375888	25	13	257	0.75	60347	9617	16017	2.1543	0.8098	Red
10154	Q14244	MAP7_HUMAN	Ensconsin OS Homo sapiens GN MAP7 PE 1 SV 1	Regular	19.5258	41.65	84165.9	5	4	65	4.81	45268	5777	4868	1.2941	0.1089	Red
5022	Q14574	DSC3_HUMAN	Desmocollin 3 OS Homo sapiens GN DSC3 PE 1 SV 3	Regular	19.5204	41.63	101281	8	7	74	1.12	29048	18885	7328	4.2303	0.4285	Red
12437	Q6ZRI0	OTOG_HUMAN	Otogelin OS Homo sapiens GN OTOG PE 2 SV 3	Regular	19.4804	41.6	326542	17	10	158	0.85	25686	4404	10807	0.9865	0.3221	Red
10647	Q8TE76	MORC4_HUMAN	MORC family CW type zinc finger protein 4 OS Homo sapiens GN MORC4 PE 1 SV 2	Regular	19.3728	41.61	107147	13	7	77	2.03	72441	12942	13234	2.8991	0.3106	Red
9302	P51812	KS6A3_HUMAN	Ribosomal protein S6 kinase alpha 3 OS Homo sapiens GN RPS6KA3 PE 1 SV 1	Regular	19.3379	41.59	84078.3	4	3	69	1.22	16919	6297	2614	1.4106	0.1186	Red
5570	Q8TE68	ES8L1_HUMAN	Epidermal growth factor receptor kinase substrate 8 like protein 1 OS Homo sapiens GN EPS8L1 PE 1 SV	Regular	19.2871	41.6	80536.3	8	5	60	1.66	18863	2727	3888	0.6109	0.0492	Red
18719	Q8TAA9	VANG1_HUMAN	Vang like protein 1 OS Homo sapiens GN VANGL1 PE 1 SV 1	Regular	19.2851	41.57	60260.2	2	4	44	3.63	7320	7257	4410	1.6256	0.098	Red
3624	Q05707	COEA1_HUMAN	Collagen alpha 1 XIV chain OS Homo sapiens GN COL14A1 PE 1 SV 3	Regular	19.2222	41.62	194599	15	8	106	0.5	48252	78228	10052	17.5235	3.4101	Red
15735	Q9C0A6	SETD5_HUMAN	SET domain containing protein 5 OS Homo sapiens GN SETD5 PE 1 SV 2	Regular	19.0612	41.7	159112	7	5	100	3.74	34686	21513	6699	4.819	0.7668	Red
4688	Q9Y4D2	DGLA_HUMAN	Sn1 specific diacylglycerol lipase alpha OS Homo sapiens GN DAGLA PE 1 SV 3	Regular	18.8828	41.84	116492	8	3	73	2.3	11788	8536.5	4609	1.9122	0.2228	Red
1390	O15072	ATS3_HUMAN	A disintegrin and metalloproteinase with thrombospondin motifs 3 OS Homo sapiens GN ADAMTS3 PE 2 SV	Regular	18.8399	41.85	138797	7	4	86	2.99	10127	8314.5	5221	1.8625	0.2585	Red
9407	P24043	LAMA2_HUMAN	Laminin subunit alpha 2 OS Homo sapiens GN LAMA2 PE 1 SV 4	Regular	18.7972	41.83	353201	30	10	243	0.64	69056	4086	16855	0.9153	0.3233	Red	6378 18114
15732	Q9BYW2	SETD2_HUMAN	Histone lysine N methyltransferase SETD2 OS Homo sapiens GN SETD2 PE 1 SV 3	Regular	18.7678	41.8	290619	13	12	191	1.91	54174	17184	13360	3.8493	1.1187	Red
19963	O15015	ZN646_HUMAN	Zinc finger protein 646 OS Homo sapiens GN ZNF646 PE 1 SV 1	Regular	18.7307	41.85	205381	12	8	127	2.57	38168	18551	10125	4.1555	0.8535	Red
1649	Q9NR09	BIRC6_HUMAN	Baculoviral IAP repeat containing protein 6 OS Homo sapiens GN BIRC6 PE 1 SV 2	Regular	18.6986	41.82	536529	32	18	290	1.46	122290	34386	34075	7.7026	4.1327	Red
18612	Q9NYU2	UGGG1_HUMAN	UDP glucose glycoprotein glucosyltransferase 1 OS Homo sapiens GN UGGT1 PE 1 SV 3	Regular	18.6812	41.8	177931	12	7	116	2.51	36307	7367	9288	1.6502	0.2936	Red
15748	O75533	SF3B1_HUMAN	Splicing factor 3B subunit 1 OS Homo sapiens GN SF3B1 PE 1 SV 3	Regular	18.4964	41.81	146572	13	9	94	2.53	49973	25069	8543	5.6156	0.8231	Red
9830	Q9NZR2	LRP1B_HUMAN	Low density lipoprotein receptor related protein 1B OS Homo sapiens GN LRP1B PE 1 SV 2	Regular	18.4543	41.78	535173	30	18	302	1.8	62793	15414	21277	3.4528	1.8479	Red
214	Q9BZC7	ABCA2_HUMAN	ATP binding cassette sub family A member 2 OS Homo sapiens GN ABCA2 PE 1 SV 3	Regular	18.3002	41.79	272211	16	10	149	1.31	101061	64426	22615	14.4318	3.9285	Red
948	P25054	APC_HUMAN	Adenomatous polyposis coli protein OS Homo sapiens GN APC PE 1 SV 2	Regular	18.2983	41.77	313813	28	15	233	1.51	83710	6166	16955	1.3812	0.4334	Red	942
10165	Q9Y4F3	MARF1_HUMAN	Meiosis arrest female protein 1 OS Homo sapiens GN KIAA0430 PE 1 SV 6	Regular	18.286	41.74	195939	15	8	126	2.18	24173	9565	9000	2.1426	0.4198	Red
18504	Q9UPU5	UBP24_HUMAN	Ubiquitin carboxyl terminal hydrolase 24 OS Homo sapiens GN USP24 PE 1 SV 3	Regular	18.2653	41.75	297388	19	13	195	1.98	105769	35343	10789	7.917	2.3544	Red
19742	Q2VY69	ZN284_HUMAN	Zinc finger protein 284 OS Homo sapiens GN ZNF284 PE 2 SV 1	Regular	18.2502	41.73	71243	6	4	49	3.04	21565	4893	5399	1.0961	0.0781	Red
16224	P18583	SON_HUMAN	Protein SON OS Homo sapiens GN SON PE 1 SV 4	Regular	18.234	41.71	264230	15	8	123	2.39	34237	4043	13585	0.9057	0.2393	Red
750	Q9BXX3	AN30A_HUMAN	Ankyrin repeat domain containing protein 30A OS Homo sapiens GN ANKRD30A PE 1 SV 3	Regular	18.2015	41.68	160546	12	8	134	1.07	45434	15510	12234	3.4743	0.5578	Red
1638	Q9Y6D5	BIG2_HUMAN	Brefeldin A inhibited guanine nucleotide exchange protein 2 OS Homo sapiens GN ARFGEF2 PE 1 SV 3	Regular	18.1902	41.66	204548	19	13	143	2.41	54379	7836.85	11852	1.7555	0.3591	Red	1637
7918	A6NES4	HTRB1_HUMAN	HEAT repeat containing protein 7B1 OS Homo sapiens GN HEATR7B1 PE 4 SV 3	Regular	18.1629	41.63	195344	11	7	121	0.59	79197	182313	15245	40.8391	7.9777	Red
568	Q5TGY3	AHDC1_HUMAN	AT hook DNA binding motif containing protein 1 OS Homo sapiens GN AHDC1 PE 1 SV 1	Regular	18.1367	41.61	170060	4	5	100	0.75	43351	2994	8598	0.6707	0.1141	Red
2032	Q9H251	CAD23_HUMAN	Cadherin 23 OS Homo sapiens GN CDH23 PE 1 SV 1	Regular	18.0279	41.58	370324	23	14	203	1.61	56463	16499	19650	3.6959	1.3687	Red	39979
15009	Q14690	RRP5_HUMAN	Protein RRP5 homolog OS Homo sapiens GN PDCD11 PE 1 SV 3	Regular	17.9792	41.63	210070	19	10	147	2.57	49361	18601	13057	4.1667	0.8753	Red
13347	O75051	PLXA2_HUMAN	Plexin A2 OS Homo sapiens GN PLXNA2 PE 1 SV 4	Regular	17.8197	41.64	214355	11	6	128	1.32	81564	9228.37	8720	2.0672	0.4431	Red	13349 13346 13348
8963	P41229	KDM5C_HUMAN	Lysine specific demethylase 5C OS Homo sapiens GN KDM5C PE 1 SV 2	Regular	17.8117	41.61	178401	10	6	139	0.9	20555	19917	8803	4.4615	0.7959	Red	8964
5061	Q9NRD9	DUOX1_HUMAN	Dual oxidase 1 OS Homo sapiens GN DUOX1 PE 1 SV 1	Regular	17.7811	41.59	178832	22	13	136	0.52	62525	9408	20361	2.1074	0.3769	Red
18823	Q7Z7G8	VP13B_HUMAN	Vacuolar protein sorting associated protein 13B OS Homo sapiens GN VPS13B PE 1 SV 2	Regular	17.7164	41.63	454596	22	17	262	1.44	95510	29673	18908	6.6469	3.0217	Red
13644	P48634	PRC2A_HUMAN	Protein PRRC2A OS Homo sapiens GN PRRC2A PE 1 SV 3	Regular	17.6593	41.71	229320	20	13	161	0.79	195719	18564	36972	4.1584	0.9536	Red
6329	P02751	FINC_HUMAN	Fibronectin OS Homo sapiens GN FN1 PE 1 SV 4	Regular	17.6071	41.69	266218	9	4	145	1.22	21559	11991	13654	2.686	0.7151	Red
18516	Q70CQ2	UBP34_HUMAN	Ubiquitin carboxyl terminal hydrolase 34 OS Homo sapiens GN USP34 PE 1 SV 2	Regular	17.5864	41.66	409994	21	13	278	1.41	59482	9176	15174	2.0555	0.8427	Red
17015	Q5VWG9	TAF3_HUMAN	Transcription initiation factor TFIID subunit 3 OS Homo sapiens GN TAF3 PE 1 SV 1	Regular	17.4299	41.67	104323	10	5	70	2.15	18977	5058	5470	1.133	0.1182	Red
6758	Q96PP8	GBP5_HUMAN	Guanylate binding protein 5 OS Homo sapiens GN GBP5 PE 2 SV 1	Regular	17.3381	41.65	67187.3	4	3	44	2.05	20222	5922	3910	1.3266	0.0891	Red
8737	Q5QGS0	K2022_HUMAN	Uncharacterized protein KIAA2022 OS Homo sapiens GN KIAA2022 PE 2 SV 1	Regular	17.2852	41.62	169262	14	8	105	1.85	33376	13329	13178	2.9858	0.5054	Red	16651
8596	Q6IE81	JADE1_HUMAN	Protein Jade 1 OS Homo sapiens GN PHF17 PE 1 SV 1	Regular	17.2659	41.6	97130.3	7	5	72	1.78	18601	13039.5	6378	2.9209	0.2837	Red
2666	Q69YH5	CDCA2_HUMAN	Cell division cycle associated protein 2 OS Homo sapiens GN CDCA2 PE 1 SV 2	Regular	17.2633	41.58	114216	7	7	85	2.44	12720	5976	5847	1.3387	0.1529	Red
14894	Q8WZ75	ROBO4_HUMAN	Roundabout homolog 4 OS Homo sapiens GN ROBO4 PE 1 SV 1	Regular	17.2591	41.55	108484	9	4	62	0.99	21639	19278	5492	4.3184	0.4685	Red
1768	Q9UPA5	BSN_HUMAN	Protein bassoon OS Homo sapiens GN BSN PE 1 SV 4	Regular	17.2226	41.53	418580	17	12	276	1.07	84609	21461	14864	4.8074	2.0123	Red
416	Q13444	ADA15_HUMAN	Disintegrin and metalloproteinase domain containing protein 15 OS Homo sapiens GN ADAM15 PE 1 SV 4	Regular	17.1692	41.51	95696.6	7	4	50	1.16	32921	3708	5562	0.8306	0.0795	Red
1551	Q9C0K0	BC11B_HUMAN	B cell lymphoma leukemia 11B OS Homo sapiens GN BCL11B PE 1 SV 1	Regular	17.162	41.48	97059.3	10	5	58	4.47	22256	12353	8859	2.7671	0.2686	Red
10116	Q86UL8	MAGI2_HUMAN	Membrane associated guanylate kinase WW and PDZ domain containing protein 2 OS Homo sapiens GN MAGI	Regular	17.1504	41.46	159553	14	8	107	3.02	42790	8184	12577	1.8333	0.2925	Red
4246	Q13620	CUL4B_HUMAN	Cullin 4B OS Homo sapiens GN CUL4B PE 1 SV 4	Regular	16.958	41.47	104552	13	8	95	1.31	37610	4287	5736	0.9603	0.1004	Red
19794	Q9C0G0	ZN407_HUMAN	Zinc finger protein 407 OS Homo sapiens GN ZNF407 PE 2 SV 2	Regular	16.7316	41.64	251816	15	11	173	1.56	25042	7430	16040	1.6644	0.4191	Red
5246	A8K855	EFCB7_HUMAN	EF hand calcium binding domain containing protein 7 OS Homo sapiens GN EFCAB7 PE 2 SV 1	Regular	16.7114	41.62	73064.9	7	3	51	2.07	6608	2643	5398	0.592	0.0433	Red
14936	P30876	RPB2_HUMAN	DNA directed RNA polymerase II subunit RPB2 OS Homo sapiens GN POLR2B PE 1 SV 1	Regular	16.6124	41.69	135323	8	4	102	1.87	18436	15570	5291	3.4878	0.472	Red
10148	P78559	MAP1A_HUMAN	Microtubule associated protein 1A OS Homo sapiens GN MAP1A PE 1 SV 6	Regular	16.5414	41.7	306968	11	9	232	1.96	75646	17590	7284	3.9403	1.2095	Red
12435	Q9HC10	OTOF_HUMAN	Otoferlin OS Homo sapiens GN OTOF PE 1 SV 3	Regular	16.493	41.68	228350	7	6	149	0.65	19596	30168	5308	6.7578	1.5431	Red
19942	Q08AN1	ZN616_HUMAN	Zinc finger protein 616 OS Homo sapiens GN ZNF616 PE 2 SV 2	Regular	16.4722	41.66	93124.5	5	4	63	2.82	59865	1570.68	5090	0.3518	0.0328	Red	19808 20070
1538	Q9UIF8	BAZ2B_HUMAN	Bromodomain adjacent to zinc finger domain protein 2B OS Homo sapiens GN BAZ2B PE 1 SV 3	Regular	16.417	41.67	242227	16	9	152	0.92	28579	15417	13463	3.4535	0.8365	Red	20662
13661	Q13029	PRDM2_HUMAN	PR domain zinc finger protein 2 OS Homo sapiens GN PRDM2 PE 1 SV 3	Regular	16.3892	41.64	191254	12	9	129	2.1	179168	5315	6372	1.1906	0.2277	Red
1393	Q9UKP5	ATS6_HUMAN	A disintegrin and metalloproteinase with thrombospondin motifs 6 OS Homo sapiens GN ADAMTS6 PE 2 SV	Regular	16.3003	41.72	128980	8	4	75	2.69	8707	3174	4558	0.711	0.0917	Red
3666	Q17RW2	COOA1_HUMAN	Collagen alpha 1 XXIV chain OS Homo sapiens GN COL24A1 PE 2 SV 2	Regular	16.2843	41.69	176352	10	6	106	1.98	24859	3538.5	10789	0.7926	0.1398	Red
10558	O14686	MLL2_HUMAN	Histone lysine N methyltransferase MLL2 OS Homo sapiens GN MLL2 PE 1 SV 2	Regular	16.09	41.77	599948	32	22	270	2.2	120537	26287	24582	5.8884	3.5328	Red
6854	Q8TEQ6	GEMI5_HUMAN	Gem associated protein 5 OS Homo sapiens GN GEMIN5 PE 1 SV 3	Regular	16.0439	41.78	170928	12	8	114	0.66	32801	15891	10569	3.5597	0.6084	Red
11347	Q96JN8	NEUL4_HUMAN	Neuralized like protein 4 OS Homo sapiens GN NEURL4 PE 1 SV 2	Regular	15.9582	41.76	168675	9	5	93	0.64	11687	19143	3361	4.2881	0.7233	Red
4662	P15924	DESP_HUMAN	Desmoplakin OS Homo sapiens GN DSP PE 1 SV 3	Regular	15.8622	41.76	334227	27	19	266	0.84	143345	10120	24976	2.2669	0.7577	Red	5497 13299
19732	Q14587	ZN268_HUMAN	Zinc finger protein 268 OS Homo sapiens GN ZNF268 PE 1 SV 2	Regular	15.7057	41.77	111796	6	5	65	1.8	31536	8424	5395	1.887	0.211	Red	21871
19563	P31629	ZEP2_HUMAN	Transcription factor HIVEP2 OS Homo sapiens GN HIVEP2 PE 1 SV 2	Regular	15.5864	41.78	271278	18	9	170	0.41	38434	2850	14521	0.6384	0.1732	Red	19562
13603	Q9BYK8	PR285_HUMAN	Peroxisomal proliferator activated receptor A interacting complex 285 kDa protein OS Homo sapiens GN	Regular	15.5704	41.76	298472	20	9	197	1.47	34752	11063	12262	2.4782	0.7397	Red
1274	P23634	AT2B4_HUMAN	Plasma membrane calcium transporting ATPase 4 OS Homo sapiens GN ATP2B4 PE 1 SV 2	Regular	15.5054	41.74	139118	11	7	91	1.93	46262	15493.5	13193	3.4706	0.4828	Red
13645	Q5JSZ5	PRC2B_HUMAN	Protein PRRC2B OS Homo sapiens GN PRRC2B PE 1 SV 2	Regular	15.4929	41.71	244107	16	11	175	1.26	41262	8067	37961	1.8071	0.4411	Red
9410	O15230	LAMA5_HUMAN	Laminin subunit alpha 5 OS Homo sapiens GN LAMA5 PE 1 SV 8	Regular	15.2708	41.88	412284	18	14	235	1.19	72636	4586	14504	1.0273	0.4235	Red
6139	Q75N90	FBN3_HUMAN	Fibrillin 3 OS Homo sapiens GN FBN3 PE 2 SV 3	Regular	14.9252	42.02	320658	7	6	164	0.36	40808	41784	4379	9.3598	3.0013	Red
10186	O60307	MAST3_HUMAN	Microtubule associated serine threonine protein kinase 3 OS Homo sapiens GN MAST3 PE 1 SV 2	Regular	14.9038	42	143936	6	4	89	1.76	20474	2719.68	20227	0.6092	0.0877	Red	10185
4797	Q9Y238	DLEC1_HUMAN	Deleted in lung and esophageal cancer protein 1 OS Homo sapiens GN DLEC1 PE 2 SV 2	Regular	14.5677	42.1	197851	14	11	103	2.79	58417	10553	10054	2.3639	0.4677	Red
19707	Q9NZL3	ZN224_HUMAN	Zinc finger protein 224 OS Homo sapiens GN ZNF224 PE 1 SV 3	Regular	14.4939	42.08	84960.5	10	4	62	1.56	11296	5973	6412	1.338	0.1137	Red
1582	Q6W2J9	BCOR_HUMAN	BCL 6 corepressor OS Homo sapiens GN BCOR PE 1 SV 1	Regular	14.4679	42.09	193729	9	9	135	1.25	30408	8047.5	4407	1.8027	0.3492	Red
13646	Q9Y520	PRC2C_HUMAN	Protein PRRC2C OS Homo sapiens GN PRRC2C PE 1 SV 4	Regular	14.3521	42.13	317539	9	9	281	1.04	14897	6933	7741	1.553	0.4931	Red
4856	Q96M86	DNHD1_HUMAN	Dynein heavy chain domain containing protein 1 OS Homo sapiens GN DNHD1 PE 1 SV 2	Regular	14.3493	42.11	539804	28	19	288	0.8	99880	9007	27082	2.0176	1.0891	Red
13127	Q9H5I5	PIEZ2_HUMAN	Piezo type mechanosensitive ion channel component 2 OS Homo sapiens GN PIEZO2 PE 2 SV 2	Regular	14.0877	42.27	320859	34	15	211	0.69	113501	39475.5	17861	8.8427	2.8373	Red
19377	Q9H6S0	YTDC2_HUMAN	Probable ATP dependent RNA helicase YTHDC2 OS Homo sapiens GN YTHDC2 PE 1 SV 2	Regular	13.9543	42.28	161674	9	7	115	0.63	56507	91395	10735	20.473	3.31	Red
16074	Q9UPR3	SMG5_HUMAN	Protein SMG5 OS Homo sapiens GN SMG5 PE 1 SV 3	Regular	13.9089	42.32	115525	8	4	65	0.79	26604	23082	7144	5.1705	0.5973	Red	30382 5625
15991	Q5TAH2	SL9C2_HUMAN	Sodium hydrogen exchanger 11 OS Homo sapiens GN SLC9C2 PE 2 SV 1	Regular	13.8761	42.3	130650	15	8	70	0.8	44161	14313	9955	3.2062	0.4189	Red
1382	Q8TE58	ATS15_HUMAN	A disintegrin and metalloproteinase with thrombospondin motifs 15 OS Homo sapiens GN ADAMTS15 PE 2 S	Regular	13.8737	42.27	105967	5	5	69	2	16233	10197	2940	2.2842	0.242	Red
8584	Q14573	ITPR3_HUMAN	Inositol 1 4 5 trisphosphate receptor type 3 OS Homo sapiens GN ITPR3 PE 1 SV 2	Regular	13.858	42.25	307016	26	18	202	1.98	586920	25848	35824	5.7901	1.7776	Red	10498 8583
7131	Q8IZF7	GP111_HUMAN	Probable G protein coupled receptor 111 OS Homo sapiens GN GPR111 PE 2 SV 1	Regular	13.8253	42.23	79823.2	6	5	41	0.99	12768	4083	4174	0.9146	0.073	Red
10999	Q9UM54	MYO6_HUMAN	Unconventional myosin VI OS Homo sapiens GN MYO6 PE 1 SV 4	Regular	13.6389	42.24	151060	8	4	110	2.55	19169	9937.5	3073	2.2261	0.3363	Red
9840	Q7Z2Q7	LRR70_HUMAN	Leucine rich repeat containing protein 70 OS Homo sapiens GN LRRC70 PE 2 SV 1	Regular	13.5769	42.21	71156.9	2	2	39	2.25	2071	3345	1401	0.7493	0.0533	Red
13190	Q7Z442	PK1L2_HUMAN	Polycystic kidney disease protein 1 like 2 OS Homo sapiens GN PKD1L2 PE 1 SV 4	Regular	13.3503	42.25	275769	9	7	137	0.49	21749	4794	8602	1.0739	0.2961	Red
911	O00203	AP3B1_HUMAN	AP 3 complex subunit beta 1 OS Homo sapiens GN AP3B1 PE 1 SV 3	Regular	13.1883	42.32	121891	5	5	95	0.91	23350	36777	3793	8.2382	1.0042	Red
18797	Q69YN4	VIR_HUMAN	Protein virilizer homolog OS Homo sapiens GN KIAA1429 PE 1 SV 2	Regular	13.0865	42.3	203679	11	6	137	1.16	26233	17013	10590	3.811	0.7762	Red
2372	Q8NDH2	CC168_HUMAN	Coiled coil domain containing protein 168 OS Homo sapiens GN CCDC168 PE 2 SV 2	Regular	12.9411	42.31	279776	27	14	221	0.73	38613	6484.5	18453	1.4526	0.4064	Red	23573 12465 11139
6048	Q6ZTR7	FA92B_HUMAN	Protein FAM92B OS Homo sapiens GN FAM92B PE 2 SV 1	Regular	12.8168	42.32	35069.8	2	2	20	4.61	11697	6465	2255	1.4482	0.0508	Red
13200	P98161	PKD1_HUMAN	Polycystin 1 OS Homo sapiens GN PKD1 PE 1 SV 3	Regular	12.6999	42.33	467947	23	19	206	1.51	61574	16099	20969	3.6063	1.6875	Red
16677	Q6ZVD7	STOX1_HUMAN	Storkhead box protein 1 OS Homo sapiens GN STOX1 PE 1 SV 2	Regular	12.3366	42.37	111931	10	6	74	1.72	17127	7425	8727	1.6632	0.1862	Red
3598	P10643	CO7_HUMAN	Complement component C7 OS Homo sapiens GN C7 PE 1 SV 2	Regular	12.3064	42.34	96711.9	4	2	63	0.83	6763	3090	6206	0.6922	0.0669	Red
8583	Q14571	ITPR2_HUMAN	Inositol 1 4 5 trisphosphate receptor type 2 OS Homo sapiens GN ITPR2 PE 1 SV 2	Regular	12.1672	42.35	311258	31	23	217	1	157334	11449	34537	2.5646	0.7983	Red	8584
11173	O15394	NCAM2_HUMAN	Neural cell adhesion molecule 2 OS Homo sapiens GN NCAM2 PE 1 SV 2	Regular	12.1157	42.36	93844.8	12	8	71	2.63	36885	27973.5	10416	6.2662	0.5881	Red
12776	Q9Y5H2	PCDGB_HUMAN	Protocadherin gamma A11 OS Homo sapiens GN PCDHGA11 PE 1 SV 1	Regular	12.0515	42.34	101942	7	5	49	0.96	33174	2841	4744	0.6364	0.0649	Red	6122 12774
13348	P51805	PLXA3_HUMAN	Plexin A3 OS Homo sapiens GN PLXNA3 PE 1 SV 2	Regular	11.8742	42.34	211182	11	10	119	2.03	76862	13311.6	11864	2.9819	0.6297	Red	13349 13346 13347
1556	O75363	BCAS1_HUMAN	Breast carcinoma amplified sequence 1 OS Homo sapiens GN BCAS1 PE 1 SV 2	Regular	11.8673	42.35	61994.1	11	5	59	3.08	29505	2568	4250	0.5752	0.0357	Red
8673	Q9UPP5	K1107_HUMAN	Uncharacterized protein KIAA1107 OS Homo sapiens GN KIAA1107 PE 1 SV 2	Regular	11.7925	42.36	157335	8	6	119	1.7	43598	7567.5	5904	1.6952	0.2667	Red
13216	P08F94	PKHD1_HUMAN	Fibrocystin OS Homo sapiens GN PKHD1 PE 1 SV 1	Regular	11.752	42.37	452405	16	10	217	1.01	49925	26196	10414	5.868	2.6547	Red
15625	Q58EX2	SDK2_HUMAN	Protein sidekick 2 OS Homo sapiens GN SDK2 PE 1 SV 3	Regular	11.6022	42.41	240309	6	10	141	1.61	86054	17892	19724	4.0079	0.9631	Red
7912	Q9P2D3	HTR5B_HUMAN	HEAT repeat containing protein 5B OS Homo sapiens GN HEATR5B PE 1 SV 2	Regular	11.5723	42.39	226983	13	9	146	1.11	54016	9557	13078	2.1408	0.4859	Red
8468	P48200	IREB2_HUMAN	Iron responsive element binding protein 2 OS Homo sapiens GN IREB2 PE 1 SV 3	Regular	11.5647	42.36	106071	11	5	67	1.14	95083	3786	15130	0.8481	0.09	Red
1246	Q9C0F0	ASXL3_HUMAN	Putative Polycomb group protein ASXL3 OS Homo sapiens GN ASXL3 PE 2 SV 3	Regular	11.4218	42.34	244485	18	12	140	1.51	84934	13482	15053	3.02	0.7384	Red
6211	Q9Y6R7	FCGBP_HUMAN	IgGFc binding protein OS Homo sapiens GN FCGBP PE 1 SV 3	Regular	10.9739	42.56	596824	9	7	249	0.89	271014	12114	34425	2.7136	1.6195	Red
9387	O60309	L37A3_HUMAN	Leucine rich repeat containing protein 37A3 OS Homo sapiens GN LRRC37A3 PE 2 SV 2	Regular	10.89	42.54	181762	13	7	79	2.39	44997	17726	8159	3.9707	0.7217	Red
1231	Q12797	ASPH_HUMAN	Aspartyl asparaginyl beta hydroxylase OS Homo sapiens GN ASPH PE 1 SV 3	Regular	10.8307	42.52	86318.9	5	3	49	1.19	12378	4134	2011	0.926	0.0799	Red
12966	O75420	PERQ1_HUMAN	PERQ amino acid rich with GYF domain containing protein 1 OS Homo sapiens GN GIGYF1 PE 1 SV 2	Regular	10.7438	42.53	115115	6	5	78	1.16	22628	7230	5979	1.6196	0.1864	Red
18121	Q13507	TRPC3_HUMAN	Short transient receptor potential channel 3 OS Homo sapiens GN TRPC3 PE 1 SV 3	Regular	10.5186	42.68	96808	6	3	60	2.03	63164	2640	2649	0.5914	0.0572	Red
8964	Q9BY66	KDM5D_HUMAN	Lysine specific demethylase 5D OS Homo sapiens GN KDM5D PE 1 SV 2	Regular	10.2757	42.72	176868	5	6	128	1.04	51000	40969.5	11402	9.1774	1.6232	Red	8963
7743	P04035	HMDH_HUMAN	3 hydroxy 3 methylglutaryl coenzyme A reductase OS Homo sapiens GN HMGCR PE 1 SV 1	Regular	10.1913	42.73	99073.1	5	2	60	1.24	14442	14313	2768	3.2062	0.3176	Red
15845	Q9UPX8	SHAN2_HUMAN	SH3 and multiple ankyrin repeat domains protein 2 OS Homo sapiens GN SHANK2 PE 1 SV 3	Regular	10.1659	42.74	159335	15	9	102	1.7	57825	5409	29281	1.2116	0.1931	Red
10320	Q9Y2X0	MED16_HUMAN	Mediator of RNA polymerase II transcription subunit 16 OS Homo sapiens GN MED16 PE 1 SV 2	Regular	10.1186	42.71	98504.2	5	4	55	1.6	13200	5389.5	3882	1.2073	0.1189	Red
3109	Q5VYM1	CI131_HUMAN	Uncharacterized protein C9orf131 OS Homo sapiens GN C9orf131 PE 2 SV 3	Regular	10.0193	42.69	119207	5	3	74	0.83	4491	2253	5378	0.5047	0.0602	Red
14367	O95980	RECK_HUMAN	Reversion inducing cysteine rich protein with Kazal motifs OS Homo sapiens GN RECK PE 1 SV 1	Regular	9.7601	42.73	111533	10	5	66	2.37	20596	14752.5	8193	3.3046	0.3686	Red
13778	Q8N3Z0	PRS35_HUMAN	Inactive serine protease 35 OS Homo sapiens GN PRSS35 PE 2 SV 2	Regular	9.648	42.71	47554.3	3	2	35	3.63	5005	3090	2843	0.6922	0.0329	Red
19956	Q14966	ZN638_HUMAN	Zinc finger protein 638 OS Homo sapiens GN ZNF638 PE 1 SV 2	Regular	9.452	42.72	222051	8	6	152	0.51	16334	6222	6067	1.3938	0.3095	Red
4392	Q69YQ0	CYTSA_HUMAN	Cytospin A OS Homo sapiens GN SPECC1L PE 1 SV 2	Regular	9.4024	42.69	125001	7	6	91	0.9	20358	8061	4226	1.8057	0.2257	Red
15421	Q9NZJ4	SACS_HUMAN	Sacsin OS Homo sapiens GN SACS PE 1 SV 2	Regular	9.3913	42.67	526830	22	19	378	0.76	132099	25140	19627	5.6315	2.9668	Red
17261	Q9NT68	TEN2_HUMAN	Teneurin 2 OS Homo sapiens GN ODZ2 PE 1 SV 3	Regular	9.3528	42.65	312236	13	14	170	1.44	89989	22076	22049	4.9451	1.5441	Red
4058	Q7Z408	CSMD2_HUMAN	CUB and sushi domain containing protein 2 OS Homo sapiens GN CSMD2 PE 1 SV 2	Regular	9.3221	42.63	387738	18	10	179	0.6	39131	14719.5	20310	3.2972	1.2785	Red
6138	P35556	FBN2_HUMAN	Fibrillin 2 OS Homo sapiens GN FBN2 PE 1 SV 3	Regular	9.3179	42.6	335476	9	5	171	0.21	20410	9888	3535	2.215	0.7431	Red
2093	Q08AD1	CAMP2_HUMAN	Calmodulin regulated spectrin associated protein 2 OS Homo sapiens GN CAMSAP2 PE 1 SV 3	Regular	9.2796	42.61	169287	8	5	123	0.81	14163	9306	6417	2.0846	0.3529	Red
18505	Q9UHP3	UBP25_HUMAN	Ubiquitin carboxyl terminal hydrolase 25 OS Homo sapiens GN USP25 PE 1 SV 4	Regular	9.1881	42.62	122902	3	4	98	1.04	16022	17742	4545	3.9743	0.4885	Red
7762	Q92619	HMHA1_HUMAN	Minor histocompatibility protein HA 1 OS Homo sapiens GN HMHA1 PE 1 SV 2	Regular	8.8025	42.63	125926	8	5	75	1.06	75124	14895	8203	3.3366	0.4202	Red
18080	Q7L0X0	TRIL_HUMAN	TLR4 interactor with leucine rich repeats OS Homo sapiens GN TRIL PE 1 SV 2	Regular	8.7415	42.61	89692.3	5	3	49	2.47	22289	2565	7161	0.5746	0.0515	Red
11768	P49790	NU153_HUMAN	Nuclear pore complex protein Nup153 OS Homo sapiens GN NUP153 PE 1 SV 2	Regular	8.729	42.58	155535	5	3	93	1.42	16038	18750	5967	4.2001	0.6533	Red
14615	A6NNM3	RIM3B_HUMAN	RIMS binding protein 3B OS Homo sapiens GN RIMBP3B PE 2 SV 3	Regular	8.5938	42.56	183347	8	6	131	0.55	26541	2832	5275	0.6344	0.1163	Red
16792	Q9BX26	SYCP2_HUMAN	Synaptonemal complex protein 2 OS Homo sapiens GN SYCP2 PE 2 SV 2	Regular	8.0596	42.66	177350	7	9	143	2.29	39031	15949	9942	3.5727	0.6336	Red
18643	Q9P2D8	UNC79_HUMAN	Protein unc 79 homolog OS Homo sapiens GN UNC79 PE 2 SV 3	Regular	8.0318	42.64	299875	7	6	182	1.4	30005	16939.5	9560	3.7945	1.1379	Red
14970	P04843	RPN1_HUMAN	Dolichyl diphosphooligosaccharide protein glycosyltransferase subunit 1 OS Homo sapiens GN RPN1 PE	Regular	7.0495	42.79	68683.6	8	3	49	2.14	11475	4665	7200	1.045	0.0718	Red
4922	Q5JWR5	DOP1_HUMAN	Protein dopey 1 OS Homo sapiens GN DOPEY1 PE 1 SV 1	Regular	6.8369	42.86	279579	6	6	149	0.41	43455	40761	9346	9.1307	2.5527	Red
649	P51648	AL3A2_HUMAN	Fatty aldehyde dehydrogenase OS Homo sapiens GN ALDH3A2 PE 1 SV 1	Regular	6.8218	42.84	55304.1	5	4	38	1.65	18492	45486	3799	10.1891	0.5635	Red
928	O14727	APAF_HUMAN	Apoptotic protease activating factor 1 OS Homo sapiens GN APAF1 PE 1 SV 2	Regular	6.5792	42.87	144178	9	9	103	0.72	19683	6558	6416	1.469	0.2118	Red
17424	P01266	THYG_HUMAN	Thyroglobulin OS Homo sapiens GN TG PE 1 SV 5	Regular	6.2873	42.88	311805	9	5	180	0.83	22655	15367.5	4677	3.4424	1.0734	Red
12807	Q15154	PCM1_HUMAN	Pericentriolar material 1 protein OS Homo sapiens GN PCM1 PE 1 SV 4	Regular	6.2151	42.86	230187	8	6	151	0.99	15078	6180	3530	1.3844	0.3187	Red
5212	Q92611	EDEM1_HUMAN	ER degradation enhancing alpha mannosidase like 1 OS Homo sapiens GN EDEM1 PE 1 SV 1	Regular	6.1535	42.84	74224.4	9	4	46	4.41	40702	4317	14124	0.967	0.0718	Red
1244	Q8IXJ9	ASXL1_HUMAN	Putative Polycomb group protein ASXL1 OS Homo sapiens GN ASXL1 PE 1 SV 3	Regular	5.918	42.87	167102	13	7	114	0.45	37045	5739	7770	1.2856	0.2148	Red
4684	O75912	DGKI_HUMAN	Diacylglycerol kinase iota OS Homo sapiens GN DGKI PE 1 SV 1	Regular	5.5963	42.85	118765	5	5	68	0.75	17095	7596	4211	1.7015	0.2021	Red
11396	Q8N5V2	NGEF_HUMAN	Ephexin 1 OS Homo sapiens GN NGEF PE 2 SV 2	Regular	5.4287	42.86	83180.9	6	4	61	0.99	12060	24813	5189	5.5582	0.4623	Red
4753	Q9UPY3	DICER_HUMAN	Endoribonuclease Dicer OS Homo sapiens GN DICER1 PE 1 SV 3	Regular	5.1756	42.86	221419	16	7	148	1.09	38819	3336	11704	0.7473	0.1655	Red
606	Q9UKA4	AKA11_HUMAN	A kinase anchor protein 11 OS Homo sapiens GN AKAP11 PE 1 SV 1	Regular	5.0649	42.84	213079	6	4	122	0.58	11909	9255	6857	2.0732	0.4417	Red
12831	Q99447	PCY2_HUMAN	Ethanolamine phosphate cytidylyltransferase OS Homo sapiens GN PCYT2 PE 1 SV 1	Regular	4.2117	42.88	44291.8	4	2	32	2.31	2118	2322	1595	0.5201	0.023	Red
20011	Q8N972	ZN709_HUMAN	Zinc finger protein 709 OS Homo sapiens GN ZNF709 PE 2 SV 1	Regular	3.3512	42.92	77503.9	13	5	48	1.4	174173	8391	14511	1.8796	0.1457	Red
3814	O75881	CP7B1_HUMAN	25 hydroxycholesterol 7 alpha hydroxylase OS Homo sapiens GN CYP7B1 PE 1 SV 2	Regular	2.7633	42.92	58769.3	4	2	36	1.78	40215	7230	4203	1.6196	0.0952	Red
13974	Q14671	PUM1_HUMAN	Pumilio homolog 1 OS Homo sapiens GN PUM1 PE 1 SV 3	Regular	1.9436	42.9	127158	7	5	59	0.93	149467	90447	30258	20.2606	2.5763	Red
19874	Q9HCE3	ZN532_HUMAN	Zinc finger protein 532 OS Homo sapiens GN ZNF532 PE 1 SV 2	Regular	1.8412	42.88	144091	3	4	110	0.61	15228	7029	2868	1.5745	0.2269	Red
614	Q5JQC9	AKAP4_HUMAN	A kinase anchor protein 4 OS Homo sapiens GN AKAP4 PE 1 SV 1	Regular	1.5299	42.86	95903.1	5	3	84	1.17	6010	2916	1920	0.6532	0.0626	Red
10136	Q96JK9	MAML3_HUMAN	Mastermind like protein 3 OS Homo sapiens GN MAML3 PE 1 SV 3	Regular	0.9093	42.86	122237	3	2	47	0.79	16060	24930	3269	5.5845	0.6826	Red
29277	RANDOM9044	RANDOM9044	Random Sequence 9044	Random	0.9643	0	87947.9	1	1	62	0	16413	0	683			Red	7106 18549
31217	RANDOM10984	RANDOM10984	Random Sequence 10984	Random	9.3453	0	396054	2	1	269	0.14	2807	0	2898			Green	8130 8987 8129
30837	RANDOM10604	RANDOM10604	Random Sequence 10604	Random	201.842	0	116498	4	1	86	0.49	25939	0	2934			Green	15042
38128	RANDOM17895	RANDOM17895	Random Sequence 17895	Random	5.3102	0	223042	2	1	158	0.25	6463	0	646			Yellow	5163
23676	RANDOM3443	RANDOM3443	Random Sequence 3443	Random	7.4732	0	118259	3	1	79	0	22936	0	5814			Red	19599 23828 18250 37033 13009 4369 28972 11558 8327 39644 16019 25347 31823 30064
23828	RANDOM3595	RANDOM3595	Random Sequence 3595	Random	7.4732	0	294082	3	1	198	0	22936	0	5814			Red	19599 23676 18250 37033 13009 4369 28972 11558 8327 39644 16019 25347 31823 30064
37033	RANDOM16800	RANDOM16800	Random Sequence 16800	Random	7.4732	0	172334	3	1	124	0	22936	0	5814			Red	19599 23676 23828 18250 13009 4369 28972 11558 8327 39644 16019 25347 31823 30064
28972	RANDOM8739	RANDOM8739	Random Sequence 8739	Random	7.4732	0	237030	3	1	152	0	22936	0	5814			Red	19599 23676 23828 18250 37033 13009 4369 11558 8327 39644 16019 25347 31823 30064
39644	RANDOM19411	RANDOM19411	Random Sequence 19411	Random	7.4732	0	58818.9	3	1	45	0	22936	0	5814			Red	19599 23676 23828 18250 37033 13009 4369 28972 11558 8327 16019 25347 31823 30064
25347	RANDOM5114	RANDOM5114	Random Sequence 5114	Random	7.4732	0	348947	3	1	235	0	22936	0	5814			Red	19599 23676 23828 18250 37033 13009 4369 28972 11558 8327 39644 16019 31823 30064
31823	RANDOM11590	RANDOM11590	Random Sequence 11590	Random	7.4732	0	253909	3	1	181	0	22936	0	5814			Red	19599 23676 23828 18250 37033 13009 4369 28972 11558 8327 39644 16019 25347 30064
30064	RANDOM9831	RANDOM9831	Random Sequence 9831	Random	7.4732	0	518848	3	1	337	0	22936	0	5814			Red	19599 23676 23828 18250 37033 13009 4369 28972 11558 8327 39644 16019 25347 31823
31191	RANDOM10958	RANDOM10958	Random Sequence 10958	Random	11.8016	0	225905	3	1	141	0.2	5440	0	2333			Yellow	18629 10957
20467	RANDOM234	RANDOM234	Random Sequence 234	Random	3.2096	0	177526	2	1	114	0	13052	0	454			Red	10955 26604 2346
26604	RANDOM6371	RANDOM6371	Random Sequence 6371	Random	3.2096	0	113195	2	1	84	0	13052	0	454			Red	20467 10955 2346
31440	RANDOM11207	RANDOM11207	Random Sequence 11207	Random	30.7128	0	273253	6	1	179	0.25	68920	0	14769			Green	9852
36711	RANDOM16478	RANDOM16478	Random Sequence 16478	Random	0.1313	0	363112	1	1	225	0	8893	0	158			Red	8551 18692
24992	RANDOM4759	RANDOM4759	Random Sequence 4759	Random	1.0369	0	179822	0	1	137	0	3365	0	999			Red	19647 10644 1590 14135 18790
21477	RANDOM1244	RANDOM1244	Random Sequence 1244	Random	22.2356	0	79662.3	2	1	61	0.71	33303	0	827			Red	4731 6299
36832	RANDOM16599	RANDOM16599	Random Sequence 16599	Random	2.3775	0	46143.2	2	1	32	0	2306	0	1982			Red	15468 10557 33533
33533	RANDOM13300	RANDOM13300	Random Sequence 13300	Random	2.3775	0	530318	2	1	376	0	2306	0	1982			Red	15468 36832 10557
30382	RANDOM10149	RANDOM10149	Random Sequence 10149	Random	0.5805	0	315122	2	1	225	0	3382	0	1189			Red	5625 16074
21968	RANDOM1735	RANDOM1735	Random Sequence 1735	Random	7.4085	0	388176	4	2	256	0.15	26073	0	9013			Red	5118 5121 2375
31214	RANDOM10981	RANDOM10981	Random Sequence 10981	Random	12.0187	0	214490	3	1	162	0.26	13596	0	875			Red	3377
23573	RANDOM3340	RANDOM3340	Random Sequence 3340	Random	1.9512	0	85919.2	2	1	48	0	7254	0	1086			Red	12465 2372 11139
27500	RANDOM7267	RANDOM7267	Random Sequence 7267	Random	2.1027	0	170282	1	1	113	0.33	1749	0	398			Red	968
36307	RANDOM16074	RANDOM16074	Random Sequence 16074	Random	1.6066	0	410433	2	1	255	0	1148	0	514			Red	5123
25350	RANDOM5117	RANDOM5117	Random Sequence 5117	Random	2.6958	0	486552	2	1	339	0	7686	0	490			Red	10557
39170	RANDOM18937	RANDOM18937	Random Sequence 18937	Random	1.8102	0	359515	2	1	245	0	9097	0	555			Red	2768
39979	RANDOM19746	RANDOM19746	Random Sequence 19746	Random	0.0553	0	307261	0	1	198	0	1065	0	442			Red	2032
20662	RANDOM429	RANDOM429	Random Sequence 429	Random	2.6593	0	91397.3	2	1	62	0	2580	0	961			Red	1538
21871	RANDOM1638	RANDOM1638	Random Sequence 1638	Random	0.5002	0	207785	1	1	138	0.27	3865	0	587			Red	19732
